# Supplementary material for: PASSIFOR: A reference library of DNA barcodes for French saproxylic beetles (Insecta, Coleoptera)
Source: Biodivers Data J. 2015 Mar 4;(3):e4078. doi: 10.3897/BDJ.3.e4078 (PMC4355675; doi:10.3897/BDJ.3.e4078)
Supplement: Supplementary material 2 — PASSIFOR library - DNA sequences [file biodiversity_data_journal-3-e4078-s002.fasta]

>PSFOR361-13|BC-PNEF-PSFOR0333|Abdera bifasciata|COI-5P
-------------------------------------------------------------------------------------GGTTCTTTAATTGGAGATGATCAAATTTATAATGTTATTGTTACTGCTCATGCATTTATTATAATTTTTTTTATAGTAATACCTATTATAATAGGAGGATTTGGAAATTGGTTAGTTCCTTTGATATTAGGAGCCCCTGATATAGCTTTTCCTCGTATGAATAATATAAGATTTTGATTATTACCCCCTTCCTTAATTTTATTAATTATAAGAAGAATCGTAGAAAATGGAGCAGGAACAGGATGAACTGTTTACCCACCTCTCTCTTCAAATATTGCTCATAGAGGGTCTTCTGTAGACTTAGCTATTTTCAGTCTTCATTTAGCAGGAGTTTCTTCAATCTTAGGCGCTGTAAATTTTATTACTACTATTATTAATATACGGCCTGTAGGAATAACTTTTGATCGAATACCTCTTTTTGTTTGATCTGTTGGTATCACTGCTGTACTTCTTTTACTTTCTTTACCAGTTTTAGCTGGAGCTATTACTATATTATTAACTGACCGTAATTTAAATACATCTTTCTTTG--------------------------------------------
>PSFOR029-13|BC-PNEF-PSFOR0001|Acanthocinus aedilis|COI-5P
AACATTATATTTTATTTTTGGTGCTTGATCTGGTATAGTAGGAACTTCACTAAGAATATTAATTCGTTCAGAATTAGGAAACCCCGGAACTTTAATTGGCAATGATCAAATTTATAATACTATTGTTACTGCCCATGCTTTTATTATGATTTTTTTCATAGTTATACCAATCATAATTGGAGGATTTGGAAATTGATTAATCCCACTAATACTTGGAGCCCCAGATATAGCTTTCCCTCGAATAAATAATATAAGATTTTGATTATTACCGCCTTCATTAACTTTATTAATCATAAGAAGAATTGTAGAAAATGGAGCAGGAACAGGATGAACAGTTTATCCCCCTTTATCTAGAAATATCGCCCATTCAGGATCTTCTGTAGACCTGGCTATTTTTAGTTTACATTTAGCTGGAATTTCCTCTATTCTAGGAGCAGTAAATTTTATTACAACAATTATTAATATACGTCCCATAGGAATAACCTTTGATCGTATACCTTTATTTGTTTGAGCAGTAAAAATTACTGCAATTTTACTTTTATTGTCATTACCTGTATTAGCAGGAGCTATTACTATATTACTTACTGATCGAAATATTAATACTTCTTTTTTTGATCCCGCTGGAGGTGGAGATCCAATTCTTTATCAACATTTATTT
>PSFOR030-13|BC-PNEF-PSFOR0002|Acanthocinus reticulatus|COI-5P
AACATTATATTTCATTTTTGGTGCTTGATCAGGTATAGTAGGAACTTCTTTAAGGATATTAATTCGTTCAGAATTAGGAAACCCTGGAACTTTAATTGGAAATGATCAAATTTATAATACTATTGTTACTGCTCATGCCTTTATCATAATTTTTTTTATAGTTATACCAATTATAATTGGAGGGTTTGGGAATTGATTAGTTCCTTTAATATTAGGAGCCCCAGATATAGCTTTCCCTCGAATAAATAATATAAGATTTTGATTACTTCCACCTTCATTAACTTTATTAATTATAAGAAGTATTGTAGAAAACGGAGCTGGTACTGGATGAACAGTATATCCACCTTTATCTAGAAATATTGCCCATGCAGGATCTTCTGTTGATTTAGCTATTTTTAGATTACATTTAGCCGGAATTTCTTCTATTTTAGGAGCAGTAAATTTCATTACTACAATTATTAATATACGACCAGTTGGTATAACATTTGATCGAATACCTTTATTTGTTTGAGCTGTAAAAATTACTGCTATTTTACTTTTATTGTCGCTACCTGTATTAGCTGGAGCTATTACAATATTACTAACTGACCGAAATATTAATACTTCCTTTTTTGACCCTGCTGGAGGAGGAGATCCAATTCTTTATCAACATTTATTT
>PSFOR098-13|BC-PNEF-PSFOR0070|Acmaeops marginatus|COI-5P
AATATTATATTTTATTTTTGGTGCTTGAGCAGGAATAGTTGGAACTTCTCTAAGTTTACTTATTCGATCTGAATTAGGAAACCCAGGTTCTTTAATTGGTAATGATCAAATTTATAATGTTATTGTTACAGCTCATGCTTTTATCATAATTTTTTTTATAGTTATACCTGTTATAATTGGAGGTTTTGGAAATTGATTAGTCCCTTTAATACTGGGTGCTCCTGATATAGCCTTCCCTCGATTGAATAATATAAGATTTTGATTATTACCCCCATCATTAACTTTATTGATTATAAGAAGAGTAGTTGAAAGAGGGGCAGGAACAGGTTGAACAGTTTACCCTCCTCTTTCTTCCAATATTGCTCATGGAGGATCTTCAGTAGATTTAGCTATTTTTAGTCTTCATTTAGCTGGAATTTCATCAATTTTAGGAGCAATTAATTTTATTACTACAGTTATTAATATACGTCCTAAAGGTATAACTTTTGATCGTATACCTCTTTTTGTTTGAGCAGTTGTAATTACAGCAATTCTTCTTTTATTATCTTTACCAGTTTTAGCTGGAGCAATTACTATATTATTAACAGATCGAAATTTAAATACTTCATTTTTTGATCCGGCAGGTGGAGGTGATCCCATTTTATACCAGCATTTATTT
>PSFOR809-13|BC-PNEF-PSFOR0686|Aegomorphus clavipes|COI-5P
-----------------------------------------------------------------------------------------------------------------------------------------------------------------------------------------------------------------------------------------------------------TAAGATTTTGATTACTCCCGCCCTCATTAACTTTGTTAATTATAAGAAGAATTGTAGAAACTGGAGCAGGAACCGGATGAACTGTTTACCCCCCACTTTCAGCTAATATCGCCCATAGGGGGTCATCAGTAGATTTAGCAATTTTTAGATTACATCTTGCCGGAATCTCTTCAATCCTGGGGGCAGTAAATTTTATTACTACAGTAATTAATATGCGACCACAGGGGATATCATTTGATCGTTTACCTCTTTTTGTCTGAGCTGTAAAAATTACAGCAATTTTACTTCTCTTATCTTTACCAGTTTTAGCAGGGGCAATTACTATACTTTTAACAGATCGAAATTTAAACACATCCTTTTTTGACCCGGCAAGAGGGGGAGATCC----------------------
>PSFOR031-13|BC-PNEF-PSFOR0003|Aegosoma scabricorne|COI-5P
AACATTATATTTAATCTTTGGAGCATGATCAGGAATAGTGGGAACCTCAATAAGAGTTTTAATTCGATCTGAACTAGGAAATCCTGGATCCTTAATTGGAGACGACCAAATTTACAACGTAATTGTTACTGCTCATGCTTTCATTATAATTTTTTTTATAGTTATGCCAGTCATAATTGGAGGATTTGGTAATTGATTAGTCCCCCTTATATTAGGAGCCCCTGATATAGCATTCCCCCGAATAAATAATATAAGGTTTTGACTTTTACCACCATCCTTAACTCTTCTTGTAATAAGAAGAATTGTAGAAAAAGGAGCCGGAACAGGATGAACCGTTTATCCACCTTTAGCAGCAAATGTTGCCCATGCAGGAGCATCTGTTGATTTAGCAATTTTCAGATTACACCTAGCAGGAATCTCTTCAATTCTAGGAGCAGCAAATTTTATTACAACAGTAATCAATATACAACCAACAGGAATAAACGCAGACCAAATACCTTTATTTGTATGAGCAGTAACAATTACTGCAATTCTTCTCCTTTTATCTCTTCCGGTTCTTGCTGGAGCTATCACTATATTATTAACAGACCGAAATCTGAATACATCATTCTTTGACCCTGCAGGAGGAGGAGATCCTATTCTTTACCAACACCTATTT
>PSFOR255-13|BC-PNEF-PSFOR0227|Aesalus scarabaeoides|COI-5P
AACTTTGTACTTCCTATTTGGGGGGTGAGCAGGAATAGTAGGAACATCCCTTAGAATCTTAATCCGGGCTGAATTAGGAAATCCAGGATCTCTAATTGGAGATGATCAAATTTACAACGTAATTGTAACTGCACATGCATTTGTTATAATTTTTTTTATAGTTATACCTACATTAATTGGAGGGTTCGGAAATTGACTTGTACCATTAATATTAGGAGCCCCTGATATAGCATTCCCCCGAATAAACAACATAAGATTTTGATTACTCCCCCCATCAATTACACTCTTATTAACAAGAAGCCTGGTAGAAAGAGGAGTTGGGACAGGTTGAACAGTATATCCACCCCTCTCTGCAAATATCGCGCATAGAGGTGCATCAGTTGATTTAGCCATCTTCAGATTACATTTAGCAGGAATCTCATCAATTTTAGGAGCAGTTAATTTCATTACAACTATATTAAATATGCGATCCCCGGGAATCACATTTGATCGAACACCATTATTTGTTTGAGCAGTAGTAATCACTGCAGTCCTTTTACTTTTATCTTTACCAGTGTTAGCAGGAGCAATTACAATACTATTAACAGATCGTAATTTAAACACCTCATTTTTTGACCCTGCAGGAGGGGGAGATCCCATTTTATACCAACATTTATTT
>PSFOR576-13|BC-PNEF-PSFOR0453|Agrilus biguttatus|COI-5P
---------------------------------------AGGAACCGCTTTAAGATTATTAATCCGAGCTGAACTAGGAAATCCTGGAGCTTTAATTGGAAATGACCAGATTTATAATGTTATTGTTACTGCACATGCCTTTATTATGATTTTTTTTATAGTTATGCCCATCATAATAGGTGGATTTGGTAACTGATTAGTTCCTCTAATATTAGGGGCCCCTGATATAGCTTTCCCCCGAATAAACAATATAAGATTTTGATTACTCCCACCTTCGTTAACTCTTCTTTTAATGAGAAGAATAGTAGAAAGAGGGGCAGGAACTGGTTGAACAGTTTACCCCCCATTAGCGGCGAATATTGCTCATAGAGGGGCATCTGTAGACCTGGCAATTTTTAGGCTTCATTTGGCAGGTATTTCTTCAATTTTGGGTGCAATTAACTTTATCACGACCGTAATTAATATGCGAGCACCTGGAATAACTTTAGACCGAACTCCTTTATTGGTCTGATCAATTGCTATCACAGCCCTGTTGTTGCTTCTATCATTACCCGTTCTAGCAGGAGCTATTACTATACTACTAACAGACCGAAATTTAAATACATCATTCTTTGACCCTGCAGGAGGAGGGGACCCTATTCTATACCAACATTTATTT
>PSFOR1053-14|PASSIFOR-NM13-073|Agriotes acuminatus|COI-5P
AACTTTATACTTCCTTTTTGGTGCCTGAGCAGGAATGCTAGGAACATCATTAAGATTATTAATTCGTGCTGAATTAGGAAACCCTGGGTCATTAATCGGTAATGACCAAATTTATAATGTTATTGTAACCGCCCATGCTTTTATCATAATTTTCTTTATAGTTATACCAATCATAATTGGAGGATTCGGAAATTGATTAGTTCCATTAATGCTAGGAGCCCCTGATATAGCATTCCCACGAATAAACAATATAAGATTCTGATTTTTACCCCCCTCATTATCTCTTCTATTAATAAGAAGAATTGTTGAAAATGGAGCAGGAACAGGATGAACAGTGTACCCCCCACTGTCATCTAATATTGCACACAGAGGATCATCAGTAGATTTAGCAATTTTCAGTCTTCACTTGGCAGGAATCTCTTCTATTTTAGGTGCCGTAAACTTTATTTCAACTGTAATTAATATACGATCAGCTGGAATCACATTTGATCGTATACCTTTATTTGTATGGGCAGTAGCTATTACTGCATTATTACTTCTTTTATCTTTACCGGTTCTAGCTGGAGCAATTACAATATTATTAACTGACCGAAACTTAAATACTTCGTTTTTTGACCCAGCAGGAGGAGGAGACCCCATCCTATACCAACACTTATTC
>PSFOR1075-14|PASSIFOR-NM13-095|Agriotes pallidulus|COI-5P
AACTCTATACTTCCTTTTTGGAGCTTGAGCTGGGATACTGGGCACATCACTAAGATTGCTAATTCGTGCTGAATTAGGAAACCCCGGATCATTAATCGGAAATGATCAAATTTATAATGTAATCGTAACTGCCCATGCCTTCATTATAATTTTCTTCATAGTTATACCAATTATAATTGGAGGATTCGGAAACTGGTTAGTCCCATTAATGCTTGGCGCCCCTGACATAGCATTCCCACGGATAAACAATATAAGATTCTGATTTTTACCACCTTCTTTATCTCTCCTATTAATAAGAAGAATTGTCGAAAATGGAGCAGGAACAGGATGAACAGTGTACCCCCCACTATCATCTAATATTGCCCATAGAGGATCATCTGTAGATCTTGCAATTTTTAGTCTACACTTAGCAGGAATCTCTTCTATTCTAGGAGCCGTAAATTTTATTTCAACTGTAATCAATATGCGATCAACTGGAATCACTTTTGACCGTATACCTTTATTTGTATGAGCAGTAGCAATTACTGCTTTATTACTTCTTTTATCTTTACCAGTTCTTGCTGGAGCAATTACTATGTTATTAACCGATCGAAATTTAAATACCTCATTCTTCGACCCAGCAGGGGGAGGAGACCCTATTCTTTATCAACACCTGTTC
>PSFOR766-13|BC-PNEF-PSFOR0643|Agriotes pilosellus|COI-5P
AACCCTATACTTCCTTTTTGGTGCTTGGGCAGGAATGCTAGGAACATCACTAAGACTGCTAATCCGTGCTGAATTAGGTAACCCTGGGTCACTAATTGGAAATGACCAGATTTATAATGTTATTGTAACAGCACATGCTTTCATTATAATTTTCTTTATAGTAATGCCCATCATAATTGGAGGATTCGGAAACTGACTAGTCCCCTTAATATTAGGGGCTCCAGACATAGCATTCCCCCGAATAAACAATATAAGATTCTGATTCTTACCCCCTTCCCTCTCACTACTTCTAATGAGAAGAATTGTAGAAAATGGTGCAGGAACAGGATGAACAGTGTACCCCCCACTATCATCCAATATCGCCCACAGAGGATCTTCAGTAGATCTAGCAATTTTTAGCCTACACTTAGCAGGAATCTCTTCAATTCTAGGAGCAGTAAACTTCATCTCTACAGTAATTAATATACGATCAACAGGAATCACATTTGATCGTATGCCCCTATTCGTTTGAGCAGTAGCAATCACTGCCCTCCTATTGCTGCTATCGCTTCCAGTCTTAGCAGGAGCTATTACAATATTATTAACTGACCGAAACCTCAACACCTCATTCTTTGACCCCGCAGGAGGAGGTGACCCAATTCTTTATCAACATTTATTC
>PSFOR1052-14|PASSIFOR-NM13-072|Agriotes pilosellus|COI-5P
-------------------------------------------------------CTGCTAATCCGTGCTGAATTAGGTAACCCTGGGTCACTAATTGGAAATGACCAGATTTATAATGTTATTGTAACAGCACATGCTTTCATTATAATTTTCTTTATAGTAATGCCCATCATAATTGGAGGATTCGGAAACTGACTAGTCCCCTTAATATTAGGGGCTCCAGACATAGCATTCCCCCGAATAAACAATATAAGATTCTGATTCTTACCCCCTTCCCTCTCACTACTTCTAATGAGAAGAATTGTAGAAAATGGTGCAGGAACAGGATGAACAGTGTACCCCCCACTATCATCCAATATCGCCCACAGAGGATCTTCAGTAGATCTAGCAATTTTTAGCCTACACTTAGCAGGAATCTCTTCAATTCTAGGAGCAGTAAACTTCATCTCTACAGTAATTAATATACGATCAACAGGAATCACATTTGATCGTATGCCCCTATTCGTTTGAGCAGTAGCAATCACTGCCCTCCTATTGCTGCTATCGCTTCCAGTCTTAGCAGGAGCTATTACAATATTATTAACTGACCGAAACCTCAACACCTCATTCTTTGACCCCGCAGGAGGAGGTGACCCAATTCTTTATCAACATTTATTC
>PSFOR176-13|BC-PNEF-PSFOR0148|Allandrus therondi|COI-5P
GACCTTATATTTTATTTTCGGCGCCTGAGCCGGGATACTAGGAACCTCATTGAGTATTTTAATTCGAACTGAACTAGGAAATCCTGGGTCATTAATCGGTAATGACCAAATTTATAATGTTATTGTGACAGCCCATGCTTTTATTATAATTTTTTTTATAGTAATGCCAACAATAATTGGAGGATTTGGAAACTGATTAGTTCCCCTTATACTATCAGCTCCTGACATAGCATTCCCCCGATTAAACAATATAAGATTCTGACTATTACCTCCCTCTTTAATTTTGTTGGTAATAAGAAGATTAGTGGAAAGAGGGGCCGGAACAGGATGAACAGTTTACCCTCCCCTTTCTTCCAATATTGCACATGGGGGTTCTTCTGTAGATTTAGCAATTTTTAGCCTTCATTTAGCAGGAGTATCTTCTATTCTTGGGGCTGTAAATTTCATTACAACGATTCTAAATATACGACCCTCAGGTATATCAATAGATCGAATACCCTTATTTGTTTGAGCAGTAGGAATCACTGCCCTCCTTCTACTTCTTTCTCTGCCTGTACTTGCAGGAGCAATCACAATACTTTTAACTGATCGTAATTTAAATACATCATTTTTTGATCCTGCAGGAGGGGGAGACCCTATTCTTTATCAGCACTTATTT
>PSFOR448-13|BC-PNEF-PSFOR0420|Alosterna tabacicolor|COI-5P
AACTCTTTACTTTATTTTCGGGGCTTGAGCGGGGATAGTAGGAACATCTCTAAGACTTTTAATTCGATCTGAACTTGGAAGGCCCGGTTCTTTTATTGGTGATGATCAAATTTATAATGTAATTGTTACTGCCCATGCTTTTATCATAATTTTTTTTATAGTAATACCAATTATAATTGGAGGATTTGGTAATTGATTAATTCCCCTAATATTAGGGGCCCCTGATATGGCATTCCCACGAATAAACAATATAAGATTTTGGTTATTACCTCCTTCATTAACTCTTTTAATTATAAGAAGTATTGTAGAAAGAGGGGCTGGTACAGGATGAACTGTTTATCCCCCTCTTTCTAGAAATATCGCACATGGGGGATCTTCTGTAGATTTAGCAATTTTTAGACTACATTTAGCAGGTATTTCGTCAATTTTGGGGGCCGTAAATTTTATTACTACAGTAATTAATATACGGCCCGTGGGAATAACCTTAGACCGAATGCCTTTATTTGTTTGAGCTGTTATTATTACAGCAATTTTATTACTTCTTTCACTTCCTGTTCTAGCAGGAGCAATTACTATGCTCTTAACTGATCGAAATCTAAATACCTCTTTTTTTGATCCAGCTGGGGGAGGTGACCCAATTTTATACCAACACTTATTT
>PSFOR103-13|BC-PNEF-PSFOR0075|Alosterna tabacicolor|COI-5P
AACTCTTTATTTTATTTTTGGAGCATGGGCAGGTATAGTAGGAATATCTTTAAGACTTTTAATTCGATCTGAACTTGGAAGCCCCGGTTCCTTTATCGGTGATGACCAAGTCTACAATGTAATTGTCACTGCCCATGCTTTCATTATAATTTTTTTTATAGTTATACCAATTATAATTGGAGGATTTGGTAATTGATTAGTACCTTTAATATTAGGTGCTCCTGATATAGCATTCCCACGAATAAACAATATGAGATTTTGATTACTCCCTCCTTCACTGACTCTTTTAATTATAAGAAGAATTGTAGAAAGTGGTGCTGGCACAGGATGAACTGTTTACCCCCCCTTATCTTCGAATATTGCTCATGGAGGATCTTCTGTAGATTTAGCAATCTTTAGACTACATTTGGCAGGTATCTCATCAATCTTGGGGGCAGTAAATTTTATTACAACAGTAATTAATATACGACCTATAGGAATAAACCTAGACCGTATACCTTTATTTGTTTGAGCTGTTGTTATTACAGCTATTTTATTACTTCTTTCACTCCCTGTTTTAGCAGGAGCTATTACCATACTTTTAACAGATCGAAATCTAAATACCTCTTTTTTTGACCCTGCCGGAGGAGGGGATCCAATTTTATACCAACACTTATTT
>PSFOR467-13|BC-PASSIFOR0040|Alosterna tabacicolor|COI-5P
-------------------------------------------------------------------------------------------------------------------------------------------------------------------------------------------------------------------------------------------------------------------------------------------------------------------------------------------------------------------------------GGGGGATCTTCTGTAGATTTAGCAATTTTTAGACTACATTTAGCAGGTATTTCGTCAATTTTGGGGGCCGTAAATTTTATTACTACAGTAATTAATATACGGCCCGTGGGAATAACCTTAGACCGAATGCCTTTATTTGTTTGAGCTGTTATTATTACAGCAATTTTATTACTTCTTTCACTTCCTGTTCTAGCAGGAGCAATTACTATGCTCTTAACTGATCGAAATCTAAATACCTCTTTTTTTGATCCA---------------------------------------
>PSFOR619-13|BC-PNEF-PSFOR0496|Amorphocephala coronata|COI-5P
-----------------------------------------------------------------------------------------------------------------------------------------------------------------------------------------------------------------------------------------------------------TAAGTTTTTGGCTTCTTCCCCCGTCACTAACTTTACTTTTAATAAGAAGAATTGCTGAAAAAGGAGCAGGAACTGGATGAACAGTATATCCGCCCCTAGCTTCTAATATTGCCCATAGAGGAGCCTCAGTTGATTTAGCTATCTTTAGCCTCCATTTAGCTGGAGTTTCATCAATTCTGGGAGCAGTAAATTTTATTTCCACTATCATAAATATACAACCAAAAAGAATACAAATAGACCAAACTCCCCTATTTGTCTGAGCAGTTGGTTTAACAGCTCTATTACTCTTATTATCCCTTCCCGTATTAGCGGGGGCAATCACCATACTTCTCACANATCGAAATATTAATACTTCATTTTTTGATCC----------------------------------------
>PSFOR721-13|BC-PNEF-PSFOR0598|Ampedus aurilegulus|COI-5P
--------------------------GAGCCGGAATACTAGGAACATCCCTAAGCCTGTTAATCCGTGCCGAATTAGGAAACCCAGGATCTCTAATCGGTAATGACCAAATCTACAATGTTATTGTAACTGCACACGCATTCATCATAATTTTCTTTATAGTTATACCAATCATAATTGGAGGTTTTGGAAATTGATTAGTTCCTCTAATACTAGGAGCCCCAGATATAGCTTTCCCACGAATAAACAATATGAGATTCTGACTCCTACCACCCTCACTAAGACTTCTACTAATAAGAAGAATTGTAGAAAATGGAGCAGGAACAGGATGAACTGTATACCCGCCTCTATCATCTAATATTGCCCACAGAGGTTCCTCAGTAGATCTTGCTATTTTCAGACTCCACCTAGCTGGTATCTCATCAATCCTAGGTGCAGTAAATTTCATCTCAACAGTAATCAATATGCGATCAACAGGAATCACATTCGACCGAATACCCCTGTTTGTATGAGCAGTAGCAATTACTGCTCTACTCCTATTGTTATCACTACCAGTTCTAGCAGGAGCAATCACAATACTTTTAACAGATCGGAATCTTAATACCTCATTCTTTGATCCAGCAGGAGGAGGAGACCCAATTCTCTACCAACACCTGTTC
>PSFOR852-13|BC-PSFOR-JD0081|Ampedus aurilegulus|COI-5P
AACTTTGTACTTTATCTTTGGCGCATGAGCCGGAATACTAGGAACATCCCTAAGCCTATTAATCCGTGCCGAATTAGGAAACCCAGGATCTCTAATCGGTAATGACCAAATCTACAATGTTATTGTAACTGCACACGCATTCATCATAATTTTCTTTATAGTTATACCAATCATAATTGGAGGTTTTGGAAATTGATTAGTTCCTCTAATACTAGGAGCCCCAGATATAGCTTTCCCACGAATAAACAATATGAGATTCTGACTCCTACCACCCTCACTAAGGCTCCTACTAATAAGAAGAATTGTAGAAAATGGGGCAGGAACAGGATGAACTGTATACCCGCCTCTATCATCTAATATTGCCCACAGAGGTTCCTCAGTTGATCTTGCTATTTTCAGACTACACCTAGCTGGTATCTCATCAATCCTAGGTGCAGTAAATTTCATCTCAACAGTAATCAATATGCGATCAACAGGAATCACATTCGACCGAATACCCCTGTTTGTATGAGCAGTAGCAATTACTGCTTTACTCCTATTGTTATCACTACCAGTTCTAGCAGGAGCAATCACAATACTTTTAACAGATCGGAATCTTAATACCTCATTCTTTGATCCAGCAGGAGGAGGAGACCCAATTCTCTACCAACACCTGTTC
>PSFOR957-14|BC-PSFOR-JD0111|Ampedus balteatus|COI-5P
AACTTTATACTTTATCTTCGGCGCATGGGCCGGTATACTAGGAACATCCCTAAGCCTATTAATCCGTGCTGAATTAGGAAACCCCGGATCCTTAATCGGCAACGACCAAATCTATAATGTTATTGTTACTGCACACGCATTCATTATAATCTTCTTCATAGTTATACCAATCATAATCGGAGGATTTGGAAATTGATTAGTACCATTAATGCTAGGAGCCCCAGATATAGCTTTCCCCCGAATAAACAACATAAGATTCTGACTATTACCTCCTTCTCTAAGACTACTACTAATAAGAAGAATTGTAGAAAACGGAGCAGGAACAGGATGAACTGTTTACCCACCATTATCATCTAATATTGCCCATAGAGGTTCCTCAGTAGATCTTGCAATCTTTAGCTTACACCTAGCTGGTATCTCGTCAATCCTAGGAGCAGTAAACTTTATCTCAACAGTAATCAATATACGATCAACAGGAATCACATTTGACCGAATACCATTATTTGTGTGAGCAGTAGCAATTACAGCCCTTCTCCTTCTATTATCACTTCCGGTTCTAGCCGGAGCAATCACGATACTTTTAACAGACCGAAATCTAAATACCTCGTTCTTTGACCCAGCAGGAGGAGGAGATCCAATTCTATACCAACACTTATTT
>PSFOR838-13|BC-PSFOR-JD0067|Ampedus balteatus|COI-5P
AACTTTATACTTTATCTTCGGCGCATGGGCCGGTATACTAGGAACATCCCTAAGCCTATTAATNCGTGCTGAATTAGGAAACCCCGGATCCTTAATCGGCAACGACCAAATCTATAATGTTATTGTTACTGCACACGCATTCATTATAATCTTCTTCATAGTTATACCAATCATAATCGGAGGATTTGGAAATTGATTAGTACCATTAATGCTAGGAGCCCCAGATATAGCTTTCCCCCGAATAAACAACATAAGATTCTGACTATTACCTCCTTCTCTAAGNCTATTACTAATAAGAAGAATTGTAGAAAACGGAGCAGGAACAGGATGAACTGTTTACCCACCATTATCATCTAATATTGCCCATAGAGGTTCCTCAGTAGATCTTGCAATCTTTAGCTTACACCTAGCTGGTATCTCGTCAATCCTAGGAGCAGTAAACTTTATCTCAACAGTAATCAATATACGATCAACAGGAATCACNTTTGACCGAATACCATTATTTGTATGAGCAGTAGCAATTACAGCCCTTCTCCTTCTATTATCACTTCCGGTTCTAGCCGGAGCAATCACGATACTTTTAACAGACCGAAATCTAAATACCTCNTTCTTTGACCCAGCAGGAGGAGGAGATCCCATTCTATACCAACACTTATTT
>PSFOR722-13|BC-PNEF-PSFOR0599|Ampedus balteatus|COI-5P
AACTTTATACTTTATCTTCGGCGCATGGGCCGGTATACTAGGAACATCCCTAAGCCTATTAATCCGTGCTGAATTAGGAAACCCCGGATCCTTAATCGGCAACGACCAAATCTATAATGTTATTGTTACTGCACACGCATTCATTATAATCTTCTTCATAGTTATACCAATCATAATCGGAGGATTTGGAAATTGATTAGTACCATTAATGCTAGGAGCCCCAGATATAGCTTTCCCCCGAATAAACAACATAAGATTCTGACTATTACCTCCTTCTCTAAGACTACTACTAATAAGAAGAATTGTAGAAAACGGAGCAGGAACAGGATGAACTGTTTACCCACCATTATCATCTAATATTGCCCATAGAGGTTCCTCAGTAGATCTTGCAATCTTTAGCTTACACCTAGCTGGTATCTCGTCAATCCTAGGAGCAGTAAACTTTATCTCAACAGTAATCAATATACGATCAACAGGAATCACATTTGACCGAATACCATTATTTGTATGAGCAGTAGCAATTACAGCCCTTCTCCTTCTATTATCACTTCCGGTTCTAGCCGGAGCAATCACGATACTTTTAACAGACCGAAATCTAAATACCTCGTTCTTTGACCCAGCAGGAGGAGGAGATCCCATTCTATACCAACACTTATTT
>PSFOR1056-14|PASSIFOR-NM13-076|Ampedus balteatus|COI-5P
AACTTTATACTTTATCTTCGGCGCATGGGCCGGTATACTAGGAACATCCCTAAGCCTATTAATTCGTGCTGAATTAGGAAACCCCGGATCCTTAATCGGCAACGACCAAATCTATAATGTTATTGTTACTGCACACGCATTCATTATAATCTTCTTCATAGTTATACCAATCATAATCGGAGGATTTGGAAATTGATTAGTACCATTAATGCTAGGAGCCCCAGATATAGCTTTCCCCCGAATAAACAACATAAGATTCTGACTATTACCTCCTTCTCTAAGCCTATTACTAATAAGAAGAATTGTAGAAAACGGAGCAGGAACAGGATGAACTGTTTACCCACCATTATCATCTAATATTGCCCATAGAGGTTCCTCAGTAGATCTTGCAATCTTTAGCTTACACCTAGCTGGTATCTCGTCAATCCTAGGGGCAGTAAACTTTATCTCAACAGTAATAAATATACGATCAACAGGAATCACGTTTGACCGAATACCATTATTTGTATGAGCAGTAGCAATTACAGCCCTTCTCCTTCTATTATCACTTCCGGTTCTAGCCGGAGCAATCACGATACTTTTAACAGACCGAAATCTAAATACCTCATTCTTTGACCCAGCAGGAGGAGGAGATCCCATTCTATACCAACACTTATTT
>PSFOR835-13|BC-PSFOR-JD0064|Ampedus brunnicornis|COI-5P
-----------------------------------------------------------------------------------------------------------------------------------------------------------------------------------------------------------------------------------------------------------TAAGATTCTGACTCTTACCACCTTCCCTAAGATTACTTCTAATAAGAAGAATTGTAGAAAATGGGGCAGGAACAGGGTGAACTGTATACCCACCGCTCTCATCAAACATTGCCCATAGAGGTTCCTCAGTAGACCTTGCAATCTTCAGTCTACACCTAGCTGGTATCTCATCAATTCTAGGAGCAGTAAATTTTATCTCAACGGTAATCAATATACGATCAACAGGAATCACATTTGACCG----------------------------------------------------------------------------------------------------------------------------------------------------------------------
>PSFOR736-13|BC-PNEF-PSFOR0613|Ampedus brunnicornis|COI-5P
-----------------------------------------------------------------------------------------------------------------------------------------------------------------------------------------------------------------------------------------------------------TAAGATTCTGACTCTTACCACCTTCCCTAAGATTACTTCTAATAAGAAGAATTGTAGAAAATGGGGCAGGAACAGGGTGAACTGTATACCCACCGCTCTCATCAAACATTGCCCATAGAGGTTCCTCAGTAGACCTTGCAATCTTCAGTCTACACCTAGCTGGTATCTCATCAATTCTAGGAGCAGTAAATTTTATCTCAACGGTAATCAATATACGATCAACAGGAATCACATTTGACCGAATACCACTATTCGTATGAGCAGTAGCAATTACAGCCCTCCTGCTACTATTATCACTCCCAGTTCTAGCCGGAGCAATCACGATACTTTTAACAGACCGAAATCTAAAT---------------------------------------------------------
>PSFOR834-13|BC-PSFOR-JD0063|Ampedus brunnicornis|COI-5P
AACTCTTTACTTTATCTTCGGCGCATGAGCCGGTATACTAGGAACATCCCTAAGCCTATTGATCCGTGCCGAATTAGGGAACCCCGGATCTTTAATCGGTAACGATCAAATCTATAATGTTATTGTTACTGCACACGCATTCATTATAATCTTCTTCATAGTTATACCTATCATAATCGGAGGATTTGGAAATTGATTAGTACCACTAATGCTAGGAGCCCCAGATATAGCTTTTCCCCGAATAAACAATATAAGATTCTGACTCTTACCACCTTCCCTAAGATTACTTCTAATAAGAAGAATTGTAGAAAATGGGGCAGGAACAGGGTGAACTGTATACCCACCGCTCTCATCAAACATTGCCCATAGAGGTTCCTCAGTAGACCTTGCAATCTTCAGTCTACACCTAGCTGGTATCTCATCAATTCTAGGAGCAGTAAATTTTATCTCAACGGTAATCAATATACGATCAACAGGAATCACATTTGACCGAATACCACTATTCGTATGAGCAGTAGCAATTACAGCCCTCCTGCTACTATTATCACTCCCAGTTCTAGCCGGAGCAATCACGATACTTTTAACAGACCGAAATCTAAATACCTCATTCTTTGACCCAGCAGGAGGAGGAGACCCTATTCTATACCAACACCTATTT
>PSFOR737-13|BC-PNEF-PSFOR0614|Ampedus brunnicornis|COI-5P
AACTCTTTACTTTATCTTCGGCGCATGAGCCGGTATACTAGGAACATCCCTAAGCCTATTGATCCGTGCCGAATTAGGGAACCCCGGATCTTTAATCGGTAACGATCAAATCTATAATGTTATTGTTACTGCACACGCATTCATTATAATCTTCTTCATAGTTATACCTATCATAATCGGAGGATTTGGAAATTGATTAGTACCACTAATGCTAGGAGCCCCAGATATAGCTTTTCCCCGAATAAACAATATAAGATTCTGACTCTTACCACCTTCCCTAAGATTACTTCTAATAAGAAGAATTGTAGAAAATGGGGCAGGAACAGGGTGAACTGTATACCCACCGCTCTCATCAAACATTGCCCATAGAGGTTCCTCAGTAGACCTTGCAATCTTCAGTCTACACCTAGCTGGTATCTCATCAATTCTAGGAGCAGTAAATTTTATCTCAACGGTAATCAATATACGATCAACAGGAATCACATTTGACCGAATACCACTATTCGTATGAGCAGTAGCAATTACAGCCCTCCTGCTACTATTATCACTCCCAGTTCTAGCCGGAGCAATCACGATACTTTTAACAGACCGAAATCTAAATACCTCATTCTTTGACCCAGCAGGAGGAGGAGACCCTATTCTATACCAACACCTATTT
>PSFOR723-13|BC-PNEF-PSFOR0600|Ampedus cardinalis|COI-5P
AACCTTATACTTTATCTTTGGAGCATGGGCCGGTATACTAGGAACATCCCTAAGCCTCTTAATCCGTGCCGAATTAGGAAACCCAGGATCTCTAATCGGTAACGACCAAATCTATAATGTTATTGTAACTGCACATGCATTCATTATAATCTTCTTCATAGTTATACCCATCATAATCGGAGGATTTGGAAATTGATTAGTACCATTAATGCTAGGAGCCCCAGATATAGCTTTCCCCCGAATAAACAACATAAGATTCTGACTTTTACCACCTTCACTAAGATTGCTTCTAATAAGAAGAATTGTAGAAAACGGAGCAGGAACAGGATGAACTGTGTACCCACCACTTTCATCAAACATTGCCCACAGAGGTTCCTCAGTAGATCTAGCAATCTTTAGTTTACACCTAGCTGGTATCTCATCAATTCTAGGAGCAGTAAATTTTATTTCAACAGTAATCAACATACGATCAACAGGAATCACATTTGACCGAATACCATTATTCGTCTGAGCAGTAGCAATTACAGCCCTCCTCCTGCTGCTATCACTACCAGTCCTTGCCGGAGCAATCACGATACTTCTAACAGACCGAAATCTAAACACCTCATTCTTTGACCCAGCAGGGGGAGGAGATCCTATTCTATACCAACACCTATTT
>PSFOR847-13|BC-PSFOR-JD0076|Ampedus cardinalis|COI-5P
AACCTTATACTTTATCTTTGGAGCATGGGCCGGTATACTAGGAACATCCCTAAGCCTCTTAATCCGTGCCGAATTAGGAAACCCAGGATCTCTAATTGGTAACGACCAAATCTATAATGTTATTGTAACTGCACATGCATTCATTATAATCTTCTTCATAGTTATACCCATCATAATCGGAGGATTTGGAAATTGATTAGTACCATTAATGCTAGGAGCCCCAGATATAGCTTTCCCCCGAATAAACAACATAAGATTCTGACTTTTACCACCTTCCCTAAGATTGCTTCTAATAAGAAGAATTGTAGAAAACGGAGCAGGAACAGGATGAACTGTGTACCCACCACTTTCATCAAACATTGCCCACAGAGGTTCCTCAGTAGATCTAGCAATCTTTAGTTTACACCTAGCTGGTATCTCATCAATTCTAGGAGCAGTAAATTTTATTTCAACAGTAATCAACATACGATCAACAGGAATCACATTTGACCGAATACCATTATTCGTCTGAGCAGTAGCAATTACAGCCCTCCTCCTGCTGCTATCACTACCAGTCCTTGCCGGAGCAATCACGATACTTCTAACAGACCGAAATCTAAACACCTCATTCTTTGACCCAGCAGGGGGAGGAGACCCTATTCTATACCAACACCTATTT
>PSFOR850-13|BC-PSFOR-JD0079|Ampedus cardinalis|COI-5P
-----------------------------------------------------------------------------------------------------------------------------------------------------------------------------------------------------------------------------------------------------------TAAGATTCTGACTTTTACCACCTTCCCTAAGATTGCTTCTAATAAGAAGAATTGTAGAAAACGGAGCAGGAACAGGATGAACTGTGTACCCACCACTTTCATCAAACATTGCCCACAGAGGTTCCTCAGTAGATCTAGCAATCTTTAGTTTACACCTAGCTGGTATCTCATCAATTCTAGGAGCAGTAAATTTTATCTCAACAGTAATCAACATACGATCAACAGGAATCACATTTGACCGAATACCATTATTCGTATGAGCAGTAGCAATTACAGCCCTCCTCCTGCTACTATCACTACCAGTCCTAGCCGGAGCAATCACAATACTTCTAACAGACCGAAATCTAAACACCTCATTCTT----------------------------------------------
>PSFOR734-13|BC-PNEF-PSFOR0611|Ampedus cinnabarinus|COI-5P
AACTTTGTACTTTATCTTTGGCGCATGAGCGGGTATACTAGGTACATCCCTAAGCCTACTAATCCGTGCCGAATTAGGAAACCCAGGATCACTAATTGGTAATGACCAAATCTACAACGTTATTGTAACCGCACACGCATTCATTATAATTTTCTTCATAGTTATGCCAATCATAATCGGAGGATTTGGAAATTGATTAGTGCCATTAATATTAGGAGCTCCAGACATAGCTTTTCCCCGAATAAACAACATAAGATTCTGACTCTTACCACCTTCCTTAAGCTTACTTCTAATAAGAAGAATCGTAGAAAATGGAGCAGGAACAGGATGAACTGTATACCCACCCCTATCATCCAATATTGCTCATAGAGGCTCATCAGTAGATCTTGCCATTTTTAGACTTCACCTAGCTGGTATCTCGTCAATTCTAGGTGCAGTAAATTTTATCTCAACAGTAATCAATATACGATCAACAGGAATCACATTCGACCGAATACCCCTATTTGTATGAGCAGTAGCAATCACTGCTCTACTACTATTATTGTCACTTCCAGTCCTAGCAGGAGCAATCACTATACTTTTAACAGACCGAAATCTTAACACCTCATTCTTTGACCCAGCAGGAGGAGGAGACCCAATCCTTTATCAACACCTATTT
>PSFOR725-13|BC-PNEF-PSFOR0602|Ampedus elegantulus|COI-5P
-----------------------------------------------------------------------------------------------------------------------------------------------------------------------------------------------------------------------------------------------------------TAAGATTCTGGCTACTACCACCCTCGTTAAGACTTCTCCTAATAAGAAGAATTGTAGAAAACGGGGCAGGAACAGGATGAACTGTTTACCCACCCCTATCATCCAACATTGCTCATAGAGGTTCCTCAGTAGATCTTGCTATTTTTAGTCTTCACCTAGCTGGTATTTCATCAATTCTTGGAGCAGTAAACTTCATCTCAACAGTAATCAATATGCGATCAACAGGAATTACATTCGACCGAATACCCCTATTCGTTTGAGCAGTAGCAATCACCGCCCTTCTCCTACTTTTATCACTTCCAGTTCTAGCAGGAGCAATCACTATACTTTTAACAGACCGAAATCTAAATACCTCCTTNTTTGACCCAGCAGGAGGAGGAG--------------------------
>PSFOR730-13|BC-PNEF-PSFOR0607|Ampedus elongatulus|COI-5P
-----------------------------------------------------------------------------------------------------------------------------------------------------------------------------------------------------------------------------------------------------------TAAGATTCTGGCTTTTACCACCCTCGCTAAGACTTCTTCTAATAAGAAGAATTGTAGAAAACGGAGCAGGAACAGGATGAACTGTGTATCCACCCCTATCATCTAACATTGCCCATAGAGGTTCCTCAGTAGATCTTGCTATTTTCAGACTTCACCTAGCTGGTATCTCATCAATTCTAGGAGCAGTAAACTTCATTTCAACAGTAATCAATATACGATCAACAGGAATTACATTCGACCGAATGCCTCTATTCGTTTGAGCAGTAGCAATTACTGCTCTTCTTCTTCTACTGTCACTTCCAGTCCTAGCAGGAGCAATTACAATACTTTTAACAGATCGAAATCTAAATACCTCCTTCTTTG--------------------------------------------
>PSFOR933-14|BC-PSFOR-JD0087|Ampedus elongatulus|COI-5P
AACTTTGTATTTTATCTTCGGCGCATGAGCCGGTATACTAGGAACATCCTTAAGACTTTTAATCCGTGCCGAATTAGGAAATCCTGGATCTTTAATTGGTAATGATCAAATCTACAATGTTATTGTTACTGCTCATGCATTCATCATAATCTTCTTCATAGTTATGCCAATCATAATTGGAGGATTTGGAAATTGATTAGTCCCATTAATGCTAGGAGCCCCAGACATAGCTTTNCCCCGAATAAATAACATAAGATTCTGGCTTTTACCACCCTCGCTAAGACTTCTTCTAATAAGAAGAATTGTAGAAAACGGAGCAGGAACAGGATGAACTGTGTATCCACCCCTATCATCTAACATTGCCCATAGAGGTTCCTCAGTAGATCTTGCTATTTTCAGACTTCACCTAGCTGGTATTTCATCAATTCTAGGAGCNGTAAACTTCATTTCAACAGTAATCAATATACGATCAACAGGAATTACATTCGANCGAATGCCTCTATTCGTTTGAGCAGTAGCAATTACTGCTCTTCTTCTTCTACTGTCACTTCCAGTCCTAGCAGGAGCAATTACAATACTTTTAACAGATCGAAATCTAAATACCTCCTTCTTTGACCCAGCAGGAGGAGGAGACCCAATTCTATACCAACATCTATTC
>PSFOR543-13|BS-PSFOR-BD0004|Ampedus elongatulus|COI-5P
-----------------------------------------------------------------------------------------------------------------------------------------------------------------------------------------------------------------------------------------------------------TAAGATTCTGGCTTTTACCACCCTCGCTAAGACTTCTTCTAATAAGAAGAATTGTAGAAAACGGAGCAGGAACAGGATGAACTGTGTATCCACCCCTATCATCTAACATTGCCCATAGAGGTTCCTCAGTAGATCTTGCTATTTTCAGACTTCACCTAGCTGGTATTTCATCAATTCTAGGAGCCGTAAACTTCATTTCAACAGTAATCAATATACGATCAACAGGAATTACATTCGATCGAATGCCTCTATTCGTTTGAGCAGTAGCAATCACTGCTCTTCTTCTTCTACTATCACTTCCAGTCCTAGCAGGAGCAATTACAATACTTTTAACAGATCGAAATCTAAATACCTCCTTCTTTGACCCAGCAGGAGGAGGAGACCCAATCCTATACCAACATCTATTC
>PSFOR827-13|BC-PSFOR-JD0056|Ampedus elongatulus|COI-5P
AACTTTGTATTTTATCTTCGGCGCATGAGCCGGTATACTAGGAACATCCTTAAGACTTTTAATCCGTGCCGAATTAGGTAATCCTGGATCTTTAATTGGTAATGATCAAATCTACAATGTTATTGTTACTGCTCATGCATTCATCATAATCTTCTTCATAGTTATGCCAATCATAATTGGAGGATTTGGAAATTGATTAGTCCCATTAATGCTAGGAGCCCCAGACATAGCTTTCCCCCGAATAAATAACATAAGATTCTGGCTTTTACCACCCTCGCTAAGACTTCTTCTAATAAGAAGAATTGTAGAAAACGGAGCAGGAACAGGATGAACTGTGTATCCACCCCTATCATCTAACATTGCCCATAGAGGTTCCTCAGTAGATCTTGCTATTTTCAGACTTCACCTAGCTGGTATCTCATCAATTCTAGGAGCAGTAAACTTCATTTCAACAGTAATCAATATACGATCAACAGGAATTACATTCGACCGAATGCCTCTATTCGTTTGAGCAGTAGCAATTACTGCTCTTCTTCTTCTACTGTCACTTCCAGTCCTAGCAGGAGCAATTACAATACTTTTAACAGATCGAAATCTAAATACCTCCTTCTTTGACCCAGCAGGAGGAGGAGACCCAATTCTATACCAACATCTATTC
>PSFOR727-13|BC-PNEF-PSFOR0604|Ampedus elongatulus|COI-5P
-----------------------------------------------------------------------------------------------------------------------------------------------------------------------------------------------------------------------------------------------------------TAAGATTCTGGCTTTTACCACCCTCGCTAAGACTTCTTCTAATAAGAAGAATTGTAGAAAACGGAGCAGGAACAGGATGAACTGTGTATCCACCCCTATCATCTAACATTGCCCATAGAGGTTCCTCAGTAGATCTTGCTATTTTCAGACTTCACCTAGCTGGTATTTCATCAATTCTAGGAGCCGTAAACTTCATTTCAACAGTAATCAATATACGATCAACAGGAATTACATTTGATCGAATGCCTCTATTCGTTTGAGCAGTAGCAATCACTGCTCTTCTTCTTCTACTATCACTTCCAGTCCTAGCAGGAGCAATTACAATACTTTTAACAGATCGAAATCTAAATACCTCCTTCTTTG--------------------------------------------
>PSFOR849-13|BC-PSFOR-JD0078|Ampedus elongatulus|COI-5P
--------------------------------------------------------------------------------------------------------------------------------------------------------------------------------------------------------------------------------------------------------------GATTCTGGCTTTTACCACCCTCGCTAAGACTTCTTCTAATAAGAAGAATTGTAGAAAACGGAGCAGGAACAGGATGAACTGTGTATCCACCCCTATCATCTAACATTGCCCATAGAGGTTCCTCAGTAGATCTTGCTATTTTCAGACTTCACCTAGCTGGTATTTCATCAATTCTAGGAGCCGTAAACTTCATTTCAACAGTAATCAATATACGATCAACAGGAATTACATTCGATCGAATGCCTCTATTCGTTTGAGCAGTAGCAATCACTGCT---------------------------------------------------------------------------------------------------------------------------------
>PSFOR853-13|BC-PSFOR-JD0082|Ampedus erythrogonus|COI-5P
----------------------------------------------TCCCTAAGACTACTAATCCGAGCTGAACTAGGAAACCCCGGATCCTTAATCGGCAACGACCAAATCTATAACGTCATTGTTACTGCACACGCATTCATTATAATTTTCTTCATAGTAATACCAATCATAATTGGTGGATTTGGAAATTGATTAGTTCCACTAATACTAGGAGCACCAGATATAGCGTTCCCCCGAATGAACAACATAAGATTCTGGCTCCTACCACCATCATTAAGTCTCCTCCTTATAAGAAGAATTGTAGAAAATGGAGCAGGAACAGGATGAACTGTCTACCCCCCCTTATCATCCAACATTGCCCATAGAGGTTCATCAGTTGACCTAGCAATTTTCAGCCTGCACCTAGCAGGAATCTCCTCGATTCTAGGCGCAGTAAATTTTATTTCAACAGTAATTAATATACGATCAACAGGAATCACATTTGATCGGATACCCTTATTTGTGTGAGCAGTAGCCATCACAGCCCTTCTACTCCTACTCTCACTTCCAGTTCTTGCCGGTGCAATCACAATACTTTTAACAGACCGAAATCTAAACACCTCCTTCTTTGACCCAGCTGGGGGAGGAGACCCTATTCTATACCAACACCTATTC
>PSFOR854-13|BC-PSFOR-JD0083|Ampedus erythrogonus|COI-5P
AACTCTTTACTTCATTTTTGGTGCATGAGCAGGAATACTAGGCACCTCCCTAAGACTACTAATCCGAGCTGAACTAGGAAACCCCGGATCCTTAATCGGCAACGACCAAATCTATAACGTCATTGTTACTGCACACGCATTCATTATAATTTTCTTCATAGTAATACCAATCATAATTGGTGGATTTGGAAATTGATTAGTTCCACTAATACTAGGAGCACCAGATATAGCGTTCCCCCGAATGAACAACATAAGATTCTGGCTCCTACCACCATCATTAAGTCTCCTCCTTATAAGAAGAATTGTAGAAAATGGAGCAGGAACAGGATGAACTGTCTACCCCCCCTTATCATCCAACATTGCCCATAGAGGTTCATCAGTTGACCTAGCAATTTTCAGCCTGCACCTAGCAGGAATCTCCTCGATTCTAGGCGCAGTAAATTTTATTTCAACAGTAATTAATATACGATCAACAGGAATCACATTTGATCGGATACCCTTATTTGTGTGAGCAGTAGCCATCACAGCCCTTCTGCTCCTACTCTCACTTCCAGTTCTTGCCGGTGCAATCACAATACTTTTAACAGACCGAAATCTAAACACCTCCTTCTTTGACCCAGCTGGGGGAGGAGACCCTATTCTATACCAACACCTATTC
>PSFOR726-13|BC-PNEF-PSFOR0603|Ampedus erythrogonus|COI-5P
AACTCTTTACTTCATTTTTGGTGCATGAGCAGGAATACTAGGCACCTCCCTAAGACTACTAATCCGAGCTGAACTAGGAAACCCCGGATCCTTAATCGGCAACGACCAAATCTATAACGTCATTGTTACTGCACACGCATTCATTATAATTTTCTTCATAGTAATACCAATCATAATTGGTGGATTTGGAAATTGATTAGTTCCACTAATACTAGGAGCACCAGATATAGCGTTCCCCCGAATGAACAACATAAGATTCTGGCTCCTACCACCATCATTAAGTCTCCTCCTTATAAGAAGAATTGTAGAAAATGGAGCAGGAACAGGATGAACTGTCTACCCCCCCTTATCATCCAACATTGCCCATAGAGGTTCATCAGTTGACCTAGCAATTTTCAGCCTGCACCTAGCAGGAATCTCCTCGATTCTAGGGGCAGTAAATTTTATTTCAACAGTAATTAATATACGATCAACAGGAATCACATTTGATCGGATACCCTTATTTGTGTGAGCAGTAGCCATCACAGCCCTTCTACTCCTACTCTCACTTCCAGTTCTTGCCGGTGCAATCACAATACTTTTAACAGACCGAAATCTAAACACCTCCTTCTTTGACCCAGCTGGGGGAGGAGACCCTATTCTATACCAACACCTATTC
>PSFOR728-13|BC-PNEF-PSFOR0605|Ampedus melanurus|COI-5P
-----------------------------------------------------------------------------------------------------------------------------------------------------------------------------------------------------------------------------------------------------------TAAGATTTTGATTATTACCCCCCTCTCTAAGATTACTTCTTATAAGAAGAATTGTAGAAAACGGAGCCGGAACAGGATGAACCGTCTACCCACCTCTATCATCAAATATTGCCCATAGAGGTTCATCAGTAGACCTTGCAATCTTCAGTCTACACCTGGCCGGAATCTCCTCAATTCTAGGAGCAGTAAATTTTATTTCAACAGTAATTAATATACGATCAACAGGAATCACATTTGATCGAATACCTCTTTTTGTATGAGCAGTAGCAATTACTGCCCTACTACTTCTGTTATCACTTCCAGTTCTAGCCGGAGCTATTACAATACTATTAACAGATCGGAACCTAAACACCTCTTTCTTTGACCCAGCAGGAGGAGGAGACCCA---------------------
>PSFOR936-14|BC-PSFOR-JD0090|Ampedus melonii|COI-5P
AACCTTATACTTTATCTTTGGAGCATGGGCCGGTATACTAGGAACATCCCTAAGCCTCTTGATCCGTGCCGAATTAGGAAACCCAGGATCTCTAATCGGTAACGACCAAATCTATAATGTTATTGTAACTGCACACGCATTCATTATAATCTTCTTCATAGTTATACCCATCATAATCGGAGGATTTGGAAATTGATTAGTACCATTAATGCTAGGAGCCCCAGATATAGCTTTCCCCCGAATAAACAACATAAGATTCTGACTTTTACCACCTTCCCTAAGATTGCTTCTAATAAGAAGAATTGTAGAAAACGGAGCAGGAACAGGATGAACTGTGTACCCACCACTTTCATCAAACATTGCCCACAGAGGTTCCTCAGTAGATCTAGCAATCTTTAGTTTACACCTAGCTGGTATCTCATCAATTCTAGGAGCAGTAAATTTTATCTCAACAGTAATCAACATACGATCAACAGGAATCACATTTGACCGAATACCATTATTCGTATGAGCAGTAGCAATTACAGCCCTCCTCCTGCTACTATCACTACCAGTCCTAGCCGGAGCAATCACAATACTTCTAACAGACCGAAATCTAAACACCTCATTCTTTGACCCAGCAGGGGGAGGAGATCCTATTCTATACCAACACCTATTT
>PSFOR542-13|BS-PSFOR-BD0003|Ampedus nemoralis|COI-5P
AACTTTATACTTTATCTTCGGCGCATGAGCCGGTATACTAGGAACATCCTTAAGACTTTTAATCCGTGCCGAATTAGGAAACCCTGGATCCCTTATTGGTAATGACCAAATCTACAATGTTATTGTTACTGCACATGCATTCATCATAATTTTCTTTATAGTTATGCCAATCATAATTGGAGGATTCGGAAATTGATTAGTCCCATTAATGCTAGGAGCCCCAGACATAGCATTCCCCCGAATAAACAACATAAGATTCTGACTTTTACCGCCCTCCTTAAGACTCCTTCTAATAAGAAGAATCGTAGAAAATGGAGCAGGAACAGGATGAACTGTATACCCGCCCCTTTCATCTAATATTGCCCATAGAGGTTCTTCAGTAGATCTTGCTATTTTCAGACTTCACCTAGCCGGTATTTCATCAATTCTAGGAGCAGTAAACTTTATCTCAACAGTAATCAATATACGATCAACAGGAATTACATTCGACCGAATACCTCTATTCGTTTGAGCAGTAGCAATCACTGCTCTTCTACTACTCTTGTCACTCCCAGTCCTAGCAGGAGCAATTACAATACTTTTAACAGACCGAAATCTAAATACCTCCTTCTTTGACCCAGCAGGAGGAGGTGATCCAATCCTATACCAACACCTATTC
>PSFOR528-13|BC-PSFOR-JD0033|Ampedus nemoralis|COI-5P
AACTTTATACTTTATCTTCGGCGCATGAGCCGGTATACTAGGAACATCCTTAAGACTTTTAATCCGTGCCGAATTAGGAAACCCTGGATCCCTTATTGGTAATGACCAAATCTACAATGTTATTGTTACTGCACATGCATTCATCATAATTTTCTTTATAGTTATGCCAATCATAATTGGAGGATTCGGAAATTGATTAGTCCCATTAATGCTAGGAGCCCCAGACATAGCATTNCCNCGAATAAACAACATAAGATTCTGACTTTTACCGCCCTCCTTAAGACTCCTTCTAATAAGAAGAATCGTAGAAAATGGAGCAGGAACAGGATGAACTGTATACCCGCCCCTTTCATCTAATATTGCCCATAGAGGTTCTTCAGTAGATCTTGCTATTTTCAGACTTCACCTAGCCGGTATTTCATCAATTCTAGGAGCAGTAAACTTTATCTCAACAGTAATCAATATACGATCAACAGGAATTACATTCGACCGAATACCTCTATTCGTTTGAGCAGTAGCAATCACTGCTCTTCTACTACTCTTGTCACTCCCAGTCCTAGCAGGAGCAATTACAATACTTTTAACAGACCGAAATCTAAATACCTCCTTCTTTGACCCAGCAGGAGGAGGTGATCCAATCCTATACCAACACCTATTC
>PSFOR932-14|BC-PSFOR-JD0086|Ampedus nemoralis|COI-5P
AACTTTATACTTTATCTTCGGCGCATGAGCCGGTATACTAGGAACATCCTTAAGACTTTTAATCCGTGCCGAATTAGGAAACCCTGGATCCCTTATTGGTAATGACCAAATCTACAACGTTATTGTTACTGCACATGCATTCATCATAATTTTCTTTATAGTTATGCCAATCATAATTGGAGGATTCGGAAATTGATTAGTCCCATTAATGCTAGGAGCCCCAGACATAGCATTCCCCCGAATAAACAACATAAGATTCTGACTTTTACCGCCCTCCTTAAGACTCCTTCTAATAAGAAGAATCGTAGAAAATGGAGCAGGAACAGGATGAACTGTATACCCGCCCCTTTCATCTAATATTGCCCATAGAGGTTCTTCAGTAGATCTTGCTATTTTCAGACTTCACCTAGCCGGTATTTCATCAATTCTAGGAGCAGTAAACTTTATCTCAACAGTAATCAATATACGATCAACAGGAATTACATTCGACCGAATACCTCTATTCGTTTGAGCAGTAGCAATCACTGCTCTTCTACTACTCTTGTCACTCCCAGTCCTAGCAGGAGCAATTACAATACTTTTAACAGACCGAAATCTAAATACCTCCTTCTTTGACCCAGCAGGAGGAGGTGATCCAATCCTATACCAACACCTATTC
>PSFOR851-13|BC-PSFOR-JD0080|Ampedus nigerrimus|COI-5P
AACTCTATACTTCATCTTTGGTGCATGAGCAGGAATACTAGGAACATCCCTAAGCCTCTTAATCCGTGCCGAATTAGGAAACCCCGGATCTCTAATTGGTAATGACCAAATCTACAACGTTATTGTTACTGCACATGCATTCATCATAATTTTCTTTATAGTTATGCCAATTATAATCGGAGGATTTGGAAATTGATTAGTCCCATTAATGCTAGGAGCCCCAGACATAGCTTTCCCCCGAATAAATAACATAAGATTCTGACTCTTACCCCCTTCTCTAAGACTTCTACTAATAAGAAGAATCGTAGAAAATGGAGCAGGAACAGGATGAACCGTTTACCCACCCCTATCATCTAACATTGCCCATAGAGGTTCCTCAGTAGATCTTGCCATTTTTAGCCTTCACCTAGCAGGAATCTCATCAATCCTAGGTGCAGTAAATTTCATCTCAACAGTAATTAATATACGATCAACAGGAATTACATTTGATCGAATACCTCTGTTTGTATGAGCAGTAGCAATCACAGCCCTTCTCCTACTATTATCACTACCAGTGCTTGCAGGAGCAATCACAATACTTTTAACAGATCGAAATCTAAACACTTCTTTCTTTGACCCAGCAGGGGGTGGAGACCCAATTCTTTACCAACACCTATTC
>PSFOR855-13|BC-PSFOR-JD0084|Ampedus nigerrimus|COI-5P
AACTCTATACTTCATCTTTGGTGCATGAGCAGGAATACTAGGAACATCCCTAAGCCTCTTAATCCGTGCCGAATTAGGAAACCCCGGATCTCTAATTGGTAATGACCAAATCTACAACGTTATTGTTACTGCACATGCATTCATCATAATTTTCTTTATAGTTATGCCAATTATAATCGGAGGATTTGGAAATTGATTAGTCCCATTAATGCTAGGAGCCCCAGACATAGCTTTCCCCCGAATAAATAACATAAGATTCTGACTCTTACCCCCTTCTCTAAGACTTCTACTAATAAGAAGAATCGTAGAAAATGGAGCAGGAACAGGATGAACCGTTTACCCACCCCTATCATCTAACATTGCCCATAGAGGTTCCTCAGTAGATCTTGCCATTTTTAGCCTTCACCTAGCAGGAATCTCATCAATCCTAGGTGCAGTAAATTTCATCTCAACAGTAATTAATATACGATCAACAGGAATTACATTTGATCGAATACCTCTGTTTGTATGAGCAGTAGCAATCACAGCCCTTCTCCTACTATTATCACTACCAGTGCTTGCAGGAGCAATCACAATACTTTTAACAGATCGAAATCTAAACACTTCTTTCTTTGACCCAGTAGGGGGTGGAGACCCAATTCTTTACCAACACCTATTC
>PSFOR828-13|BC-PSFOR-JD0057|Ampedus nigerrimus|COI-5P
AACTCTATACTTCATCTTTGGTGCATGAGCAGGAATACTAGGAACATCCCTAAGCCTCTTAATCCGTGCCGAATTAGGAAACCCCGGATCTCTAATTGGTAATGACCAAATCTACAACGTTATTGTTACTGCACATGCATTCATCATAATTTTCTTTATAGTTATGCCAATTATAATCGGAGGATTTGGAAATTGATTAGTCCCATTAATGCTAGGAGCCCCAGACATAGCTTTCCCCCGAATAAATAACATAAGATTCTGACTTTTACCCCCTTCACTAAGACTTCTACTAATAAGAAGAATCGTAGAAAATGGAGCAGGAACAGGATGAACCGTTTACCCACCCCTATCATCTAACATTGCCCATAGAGGTTCCTCAGTAGATCTTGCCATTTTTAGCCTTCACCTAGCAGGAATCTCATCAATCCTAGGTGCAGTAAATTTCATCTCAACAGTAATTAATATACGATCAACAGGAATTACATTTGATCGAATACCTCTGTTTGTATGAGCAGTAGCAATCACAGCCCTTCTCCTACTATTATCACTACCAGTGCTTGCAGGAGCAATCACAATACTTTTAACAGATCGAAATCTAAACACTTCTTTCTTTGACCCAGCAGGAGGTGGAGACCCAATTCTTTACCAACACCTATTC
>PSFOR338-13|BC-PNEF-PSFOR0310|Ampedus nigerrimus|COI-5P
AACTCTATACTTCATCTTTGGTGCATGAGCAGGAATACTAGGAACATCCCTAAGCCTCTTAATCCGTGCCGAATTAGGAAACCCCGGATCTCTAATTGGTAATGACCAAATCTACAACGTTATTGTTACTGCACATGCATTCATCATAATTTTCTTTATAGTTATGCCAATTATAATCGGAGGATTTGGAAATTGATTAGTCCCATTAATGCTAGGAGCCCCAGACATAGCTTTCCCCCGAATAAATAACATAAGATTCTGACTCTTACCCCCTTCTCTAAGACTTCTACTAATAAGAAGAATCGTAGAAAATGGAGCAGGAACAGGATGAACCGTTTACCCACCCCTATCATCTAACATTGCCCATAGAGGTTCCTCAGTAGATCTTGCCATTTTTAGCCTTCACCTAGCAGGAATCTCATCAATCCTAGGTGCAGTAAATTTCATCTCAACAGTAATTAATATACGATCAACAGGAATTACATTTGATCGAATACCTCTGTTTGTATGAGCAGTAGCAATCACAGCCCTTCTCCTACTATTATCACTACCAGTGCTTGCAGGAGCAATCACAATACTTTTAACAGATCGAAATCTAAACACTTCTTTCTTTGACCCAGCAGGGGGTGGAGACCCAATTCTTTACCAACACCTATTC
>PSFOR738-13|BC-PNEF-PSFOR0615|Ampedus nigrinus|COI-5P
AACTTTATACTTTATCTTTGGTGCATGGGCAGGTATACTAGGAACCTCTCTTAGCCTTCTAATCCGCGCTGAATTAGGGAACCCTGGATCTTTAATTGGCAACGATCAAATCTACAATGTTATTGTAACTGCCCATGCATTCATTATAATTTTCTTCATAGTTATACCAATCATAATCGGAGGATTTGGAAATTGACTAGTCCCATTAATGTTAGGAGCCCCAGATATAGCATTCCCACGAATAAACAATATAAGATTCTGGCTATTACCTCCTTCACTAAGATTACTTCTAATAAGAAGAATTGTAGAAAATGGAGCAGGAACAGGATGAACTGTTTACCCTCCCCTCTCATCTAATATTGCCCACAGAGGTTCCTCAGTAGACCTGGCAATTTTCAGGTTACACTTAGCTGGAATTTCATCAATTCTAGGAGCAGTAAATTTTATCTCAACAGTGATCAATATACGATCAACAGGAATTTCATTCGACCGAATACCTTTGTTTGTTTGAGCAGTAGCCATCACTGCTCTTCTCCTTCTATTATCACTCCCAGTTCTTGCTGGAGCAATTACAATACTTTTAACAGACCGAAATCTAAATACTTCATTCTTTGACCCAGCAGGAGGAGGCGACCCAATCCTATACCAACACCTATTT
>PSFOR959-14|BC-PSFOR-JD0113|Ampedus nigrinus|COI-5P
AACTTTATACTTTATCTTTGGTGCATGGGCAGGTATACTAGGAACCTCTCTTAGCCTTCTAATCCGCGCTGAATTAGGAAACCCTGGATCTTTAATTGGCAACGATCAAATCTACAATGTTATTGTAACTGCCCATGCATTCATTATAATTTTCTTCATAGTTATACCAATCATAATCGGAGGATTTGGAAATTGACTAGTCCCATTAATGTTAGGAGCCCCAGATATAGCATTCCCACGAATAAACAATATAAGATTCTGGCTATTACCTCCTTCACTAAGATTACTTCTAATAAGAAGAATTGTAGAAAATGGAGCAGGAACAGGATGAACTGTTTACCCTCCCCTCTCATCCAATATTGCCCACAGAGGTTCCTCAGTAGACCTGGCAATCTTCAGGTTACACTTAGCTGGAATTTCATCAATTCTAGGAGCAGTAAATTTTATCTCAACAGTGATCAATATACGATCAACAGGAATTTCATTCGACCGAATACCTTTGTTTGTTTGAGCAGTAGCCATCACTGCTCTTCTCCTTCTCTTATCACTCCCAGTTCTTGCTGGAGCAATTACAATACTTTTAACAGACCGAAATCTAAATACTTCATTTTTTGACCCAGCAGGAGGAGGCGACCCAATCCTATACCAACACCTATTT
>PSFOR837-13|BC-PSFOR-JD0066|Ampedus pomonae|COI-5P
----------------------------------------------TCCCTAAGTCTATTAATCCGTGCCGAATTAGGAAACCCCGGATCACTAATTGGTAACGACCAAATTTATAACGTTATTGTAACTGCACATGCATTCATCATAATTTTCTTTATAGTTATGCCAATCATAATCGGAGGATTTGGAAATTGATTAGTCCCATTAATGCTAGGAGCCCCAGACATAGCTTTTCCCCGAATAAACAACATAAGATTCTGACTCTTACCACCCTCATTAAGACTTCTCCTAATAAGAAGAATTGTAGAAAANGGAGCAGGAACAGGATGAACTGTATACCCACCCCTTTCATCCAACATTGCCCATAGAGGTTCCTCAGTAGATCTAGCAATTTTCAGACTTCACCTAGCTGGTATCTCATCAATTCTAGGAGCAGTAAATTTCATCTCTACAGTAATTAATATACGATCAACAGGAATTACATTTGATCGTATACCTCTATTTGTATGAGCAGTAGCAATCACTGCTCTGCTTCTGTTATTATCTCTTCCAGTTCTTGCAGGAGCAATCACGATACTTTTAACAGACCGGAATTTAAATACCTCCTTTTTCGACCCAGCAGGAGGAGGGGACCCAATTCTTTATCAGCATTTATTC
>PSFOR529-13|BC-PSFOR-JD0034|Ampedus pomorum|COI-5P
AACTTTATACTTTATCTTCGGCGCATGAGCCGGTATACTAGGAACATCCTTAAGACTTTTAATCCGTGCCGAATTAGGAAACCCTGGATCCCTTATTGGTAATGACCAAATCTACAATGTTATTGTTACTGCACATGCATTCATCATAATTTTCTTTATAGTTATGCCAATCATAATTGGAGGATTCGGAAATTGATTAGTCCCATTAATGCTAGGAGCCCCAGACATAGCATTCCCCCGAATAAACAACATAAGATTCTGACTTTTACCGCCCTCCTTAAGACTCCTTCTAATAAGAAGAATCGTAGAAAATGGAGCAGGAACAGGATGAACTGTATACCCGCCCCTTTCATCTAATATTGCCCATAGAGGTTCTTCAGTAGATCTTGCTATTTTCAGACTTCACCTAGCCGGTATTTCATCAATTCTAGGAGCAGTAAACTTTATCTCAACAGTAATCAATATACGATCAACAGGAATTACATTCGACCGAATACCTCTATTCGTTTGAGCAGTAGCAATCACTGCTCTTCTACTACTCTTGTCACTCCCAGTCCTAGCAGGAGCAATTACAATACTTTTAACAGACCGAAATCTAAATACCTCCTTCTTTGACCCAGCAGGAGGAGGTGATCCAATCCTATACCAACACCTATTC
>PSFOR550-13|BS-PSFOR-BD0011|Ampedus pomorum|COI-5P
-----------------------------------------------------------------------------------------------------------------------------------------------------------------------------------------------------------------------------------------------------------TAAGATTCTGACTTTTACCGCCCTCCTTAAGACTCCTTCTAATAAGAAGAATCGTAGAAAATGGAGCAGGAACAGGATGAACTGTATACCCGCCCCTTTCATCTAATATTGCCCATAGAGGTTCTTCAGTAGATCTTGCTATTTTCAGACTTCACCTAGCCGGTATTTCATCAATTCTAGGAGCAGTAAACTTTATCTCAACAGTAATCAATATACGATCAACAGGAATTACATTCGACCGAATACCTCTATTCGTTTGAGCAGTAGCAATCACTGCTCTTCTACTACTCTTGTCACTCCCAGTCCTAGCAGGAGCAATTACAATACTTTTAACAGACCGAAATCTAAATACCTCCTTCTTTGACCCAGCAGGAGGAGGTGATCCAATCCTATACCAACACCTATTC
>PSFOR544-13|BS-PSFOR-BD0005|Ampedus pomorum|COI-5P
AACTTTATACTTTATCTTCGGCGCATGAGCCGGTATACTAGGAACATCCTTAAGACTTTTAATCCGTGCCGAATTAGGAAACCCTGGATCCCTTATTGGTAATGACCAAATCTACAATGTTATTGTTACTGCACATGCATTCATCATAATTTTCTTTATAGTTATGCCAATCATAATTGGAGGATTCGGAAATTGATTAGTCCCATTAATGCTAGGAGCCCCAGACATAGCATTCCCCCGAATAAACAACATAAGATTCTGACTTTTACCGCCCTCCTTAAGACTCCTCCTAATAAGAAGAATCGTAGAAAATGGAGCAGGAACAGGATGAACTGTATACCCGCCCCTTTCATCTAATATTGCCCATAGAGGTTCTTCAGTAGATCTTGCTATTTTCAGACTTCACCTAGCCGGTATTTCATCAATTCTAGGAGCAGTAAACTTTATCTCAACAGTAATCAATATACGATCAACAGGAATTACATTCGACCGAATACCTCTATTCGTTTGAGCAGTAGCAATCACTGCTCTTCTATTACTCTTGTCACTCCCAGTCCTAGCAGGAGCAATTACAATACTTTTAACAGACCGAAATCTAAATACCTCCTTCTTTGACCCAGCAGGAGGAGGTGA-------------------------
>PSFOR546-13|BS-PSFOR-BD0007|Ampedus pomorum|COI-5P
AACTTTATACTTTATCTTCGGCGCATGAGCCGGTATACTAGGAACATCCTTAAGACTTTTAATCCGTGCCGAATTAGGAAACCCTGGATCCCTTATTGGTAATGACCAAATCTACAATGTTATTGTTACTGCACATGCATTCATCATAATTTTCTTTATAGTTATGCCAATCATAATTGGAGGATTCGGAAATTGATTAGTCCCATTAATGCTAGGAGCCCCAGACATAGCATTCCCCCGAATAAACAACATAAGATTCTGACTTTTACCGCCCTCCTTAAGACTCCTCCTAATAAGAAGAATCGTAGAAAATGGAGCAGGAACAGGATGAACTGTATACCCGCCCCTTTCATCTAATATTGCCCATAGAGGTTCTTCAGTAGATCTTGCTATTTTCAGACTTCACCTAGCCGGTATTTCATCAATTCTAGGAGCAGTAAACTTTATCTCAACAGTAATCAATATACGATCAACAGGAATTACATTCGACCGAATACCTCTATTCGTTTGAGCAGTAGCAATCACTGCTCTTCTATTACTCTTGTCACTCCCAGTCCTAGCAGGAGCAATTACAATACTTTTAACAGACCGAAATCTAAATACCTCCTTCTTTGACCCAGCAGGAGGAGGTGATCCAATCCTATACCAACACCTATTC
>PSFOR530-13|BC-PSFOR-JD0035|Ampedus pomorum|COI-5P
-----------------------------------------------------------------------------------------------------------------------------------------------------------------------------------------------------------------------------------------------------------TAAGATTCTGACTTTTACCGCCCTCCTTAAGACTCCTTCTAATAAGAAGAATCGTAGAAAATGGAGCAGGAACAGGATGAACTGTATACCCGCCCCTTTCATCTAATATTGCCCATAGAGGTTCTTCAGTAGATCTTGCTATTTTCAGACTTCACCTAGCCGGTATTTCATCAATTCTAGGAGCAGTAAACTTTATCTCAACAGTAATCAATATACGATCAACAGGAATTACATTCGACCGAATACCTCTATTCGTTTGAGCAGTAGCAATCACTGCTCTTCTACTACTCTTGTCACTCCCAGTCCTAGCAGGAGCAATTACAATACTTTTAACAGACCGAAATCTAAATACCTCCTTCTTTGACCCAGCAGGAGGAGGTGATCCAATCCTATACCAACACCTATTC
>PSFOR532-13|BC-PSFOR-JD0037|Ampedus pomorum|COI-5P
AACTTTATACTTTATCTTCGGCGCATGAGCCGGTATACTAGGAACATCCTTAAGACTTTTAATCCGTGCCGAATTAGGAAACCCTGGATCCCTTATTGGTAATGACCAAATCTACAATGTTATTGTTACTGCACATGCATTCATCATAATTTTCTTTATAGTTATACCAATCATAATTGGAGGATTCGGAAATTGATTAGTCCCATTAATGCTAGGAGCCCCAGACATAGCCTTTCCTCGAATAAACAACATAAGATTCTGACTTTTACCGCCCTCCTTAAGACTCCTTCTAATAAGAAGAATTGTAGAAAATGGAGCAGGAACAGGATGAACTGTATACCCACCCCTTTCATCTAATATTGCCCATAGAGGTTCTTCAGTAGATCTTGCTATTTTCAGACTTCACCTAGCCGGTATTTCATCAATTCTAGGAGCAGTAAACTTTATTTCAACAGTAATCAATATACGATCAACAGGAATCACATTCGACCGAATACCCCTATTCGTTTGAGCAGTAGCAATCACTGCCCTTCTTCTACTATTATCACTTCCAGTTCTAGCAGGAGCAATTACAATACTTTTAACAGACCGAAATCTAAATACCTCCTTCTTTGACCCAGCAGGAGGAGGTGATCCAATCCTATACCAACACTTATTC
>PSFOR548-13|BS-PSFOR-BD0009|Ampedus pomorum|COI-5P
AACTTTATACTTTATCTTCGGCGCATGAGCCGGTATACTAGGAACATCCTTAAGACTTTTAATCCGTGCCGAATTAGGAAACCCTGGATCCCTTATTGGTAATGACCAAATCTACAATGTTATTGTTACTGCACATGCATTCATCATAATTTTCTTTATAGTTATGCCAATCATAATTGGAGGATTCGGAAATTGATTAGTCCCATTAATGCTAGGAGCCCCAGACATAGCATTCCCCCGAATAAACAACATAAGATTCTGACTTTTACCGCCCTCCTTAAGACTCCTTCTAATAAGAAGAATCGTAGAAAATGGAGCAGGAACAGGATGAACTGTATACCCGCCCCTTTCATCTAATATTGCCCATAGAGGTTCTTCAGTAGATCTTGCTATTTTCAGACTTCACCTAGCCGGTATTTCATCAATTCTAGGAGCAGTAAACTTTATCTCAACAGTAATCAATATACGATCAACAGGAATTACATTCGACCGAATACCTCTATTCGTTTGAGCAGTAGCAATCACTGCTCTTCTACTACTCTTGTCACTCCCAGTCCTAGCAGGAGCAATTACAATACTTTTAACAGACCGAAATCTAAATACCTCCTTCTTTGACCCAGCAGGAGGAGGTGATCCAATCCTATACCAACACCTATTC
>PSFOR537-13|BC-PSFOR-JD0042|Ampedus pomorum|COI-5P
--------------------------------------------------------------------------------------------------------------------------------------------------------------------------------------------------------------------------------------------------------------------------------------------TCCTTTTAATAAGAAGAATCGTAGAAAATGGAGCAGGAACAGGATGAACTGTATACCCGCCCCTTTCATCTAATATTGCCCATAGAGGTTCTTCAGTAGATCTTGCTATTTTCAGACTTCACCTAGCCGGTATTTCATCAATTCTAGGAGCAGTAAACTTTATCTCAACAGTAATCAATATACGATCAACAGGAATTACATTCGACCGAATACCTCTATTCGTTTGAGCAGTAGCAATCACTGCTCTTCTACTACTCTTGTCACTCCCAGTCCTAGCAGGAGCAATTACAATACTTTTAACAGACCGAAATCTAAATACCTCCTTCTTTGACCCAGCAGGAGGAGGTGATCCAATCCTATACCAACACCTATTC
>PSFOR547-13|BS-PSFOR-BD0008|Ampedus pomorum|COI-5P
AACTTTATACTTTATCTTCGGCGCATGAGCCGGTATACTAGGAACATCCTTAAGACTTTTAATCCGTGCCGAATTAGGAAACCCTGGATCCCTTATTGGTAATGACCAAATCTACAATGTTATTGTTACTGCACATGCATTCATCATAATTTTCTTTATAGTTATGCCAATCATAATTGGAGGATTCGGAAATTGATTAGTCCCATTAATGCTAGGAGCCCCAGACATAGCATTCCCCCGAATAAACAACATAAGATTCTGACTTTTACCGCCCTCCTTAAGACTCCTTCTAATAAGAAGAATCGTAGAAAATGGAGCAGGAACAGGATGAACTGTATACCCGCCCCTTTCATCTAATATTGCCCATAGAGGTTCTTCAGTAGATCTTGCTATTTTCAGACTTCACCTAGCCGGTATTTCATCAATTCTAGGAGCAGTAAACTTTATCTCAACAGTAATCAATATACGATCAACAGGAATTACATTCGACCGAATACCTCTATTCGTTTGAGCAGTAGCAATCACTGCTCTTCTACTACTCTTGTCACTCCCAGTCCTAGCAGGAGCAATTACAATACTTTTAACAGACCGAAATCTAAATACCTCCTTCTTTGACCCAGCAGGAGGAGGTGATCCAATCCTATACCAACACCTATTC
>PSFOR848-13|BC-PSFOR-JD0077|Ampedus praestus|COI-5P
AACCTTATACTTTATCTTTGGAGCATGGGCCGGTATACTAGGAACATCCCTAAGCCTCTTGATCCGTGCCGAATTAGGAAACCCAGGATCTCTAATCGGTAACGACCAAATCTATAATGTTATTGTAACTGCACACGCATTCATTATAATCTTCTTCATAGTTATACCCATCATAATCGGAGGATTTGGAAATTGATTAGTACCATTAATGCTAGGAGCCCCAGATATAGCTTTCCCCCGAATAAACAACATAAGATTCTGACTTTTACCACCTTCCCTAAGATTGCTTCTAATAAGAAGAATTGTAGAAAACGGAGCAGGAACAGGATGAACTGTGTACCCACCACTTTCATCAAACATTGCCCACAGAGGTTCCTCAGTAGATCTAGCAATCTTTAGTTTACACCTAGCTGGTATCTCATCAATTCTAGGAGCAGTAAATTTTATCTCAACAGTAATCAACATACGATCAACAGGAATCACATTTGACCGAATACCATTATTCGTGTGAGCAGTAGCAATTACAGCCCTCCTCCTGCTACTATCACTACCAGTCCTAGCCGGAGCAATCACAATACTTCTAACAGACCGAAATCTAAACACCTCATTCTTTGACCCAGCAGGGGGAGGAGATCCTATTCTATACCAACACCTATTT
>PSFOR735-13|BC-PNEF-PSFOR0612|Ampedus praestus|COI-5P
AACCTTATACTTTATCTTTGGAGCATGGGCCGGTATACTAGGAACATCCCTAAGCCTCTTGATCCGTGCCGAATTAGGAAACCCAGGATCTCTAATCGGTAACGACCAAATCTATAATGTTATTGTAACTGCACACGCATTCATTATAATCTTCTTCATAGTTATACCCATCATAATCGGAGGATTTGGAAATTGATTAGTACCATTAATGCTAGGAGCCCCAGATATAGCTTTCCCCCGAATAAACAACATAAGATTCTGACTTTTACCACCTTCCCTAAGATTGCTTCTAATAAGAAGAATTGTAGAAAACGGAGCAGGAACAGGATGAACTGTGTACCCACCACTTTCATCAAACATTGCCCACAGAGGTTCCTCAGTAGATCTAGCAATCTTTAGTTTACACCTAGCTGGTATCTCATCAATTCTAGGAGCAGTAAATTTTATCTCAACAGTAATCAACATACGATCAACAGGAATCACATTTGACCGAATACCATTATTCGTATGAGCAGTAGCAATTACAGCCCTCCTCCTGCTACTATCACTACCAGTCCTAGCCGGAGCAATCACAATACTTCTAACAGACCGAAATCTAAACACCTCATTCTTTGACCCAGCAGGGGGAGGAGATCCTATTCTATACCAACACCTATTT
>PSFOR539-13|BC-PSFOR-JD0044|Ampedus quercicola|COI-5P
-----------------------------------------------------------------------------------------------------------------------------------------------------------------------------------------------------------------------------------------------------------TAAGATTCTGACTCTTACCACCNTCNTTAAGNCTTCTACTAATAAGAAGAATCGTAGAAAATGGAGCAGGAACAGGATGAACTGTATACCCACCCCTATCATCCAATATTGCCCATAGAGGTTCCTCAGTTGATCTTGCCATCTTTAGACTTCACCTAGCTGGTATCTCATCAATTTTAGGTGCAGTAAATTTTATCTCAACAGTNATCAATATACGATCAACAGGANTTACATTTGATCGTATACCCCTATTTGTATGAGCAGTAGCAATTACTGCTCTACTCCTACTATTATCACTTCCAGTTCTAGCAGGAGCAATCACAATACTTCTAACAGATCGAAACCTTAATACCTCTTTCTTTGACCCAGCAGGAGGAGGAGACCCAATCCTATACCAACATCTATTC
>PSFOR1004-14|PASSIFOR-NM13-024|Ampedus quercicola|COI-5P
AACTTTGTACTTTATTTTTGGCGCGTGAGCAGGTATACTAGGAACCTCTCTAAGCCTATTAATCCGTGCCGAATTAGGAAACCCTGGTTCTCTGATTGGTAACGATCAAATCTACAACGTTATTGTAACCGCACACGCATTCATTATGATTTTCTTTATAGTAATGCCAATCATAATCGGAGGATTTGGAAATTGACTAGTCCCATTAATGCTAGGAGCCCCAGATATAGCTTTCCCCCGAATAAACAACATAAGATTCTGACTCTTACCACCTTCCTTAAGTCTTCTACTAATAAGAAGAATCGTAGAAAATGGAGCAGGAACAGGATGAACTGTATACCCACCCCTATCATCCAATATTGCCCATAGAGGTTCCTCAGTTGATCTTGCCATCTTTAGACTTCACCTAGCTGGTATCTCATCAATTTTAGGTGCAGTAAATTTTATCTCAACAGTGATCAATATACGATCAACAGGAGTCACATTTGATCGTATACCCCTATTTGTATGAGCAGTAGCAATTACTGCTCTACTCCTACTATTATCACTTCCAGTTCTAGCAGGAGCAATCACAATACTTCTAACAGATCGAAACCTTAATACCTCTTTCTTTGACCCAGCAGGAGGAGGAGACCCAATCCTATATCAACATCTATTC
>PSFOR540-13|BS-PSFOR-BD0001|Ampedus quercicola|COI-5P
AACTTTGTACTTTATTTTTGGCGCGTGAGCAGGTATACTAGGAACCTCTCTAAGCCTATTAATCCGTGCCGAATTAGGAAACCCTGGTTCTCTGATTGGTAACGATCAAATCTACAACGTTATTGTAACCGCACACGCATTCATTATGATTTTCTTTATAGTAATGCCAATCATAATCGGAGGATTTGGAAATTGACTAGTCCCATTAATGCTAGGAGCCCCAGATATAGCTTTCCCCCGAATAAACAACATAAGATTCTGACTCTTACCACCTTCCTTAAGTCTTCTACTAATAAGAAGAATCGTAGAAAATGGAGCAGGAACAGGATGAACTGTATACCCACCCCTATCATCCAATATTGCCCATAGAGGTTCCTCAGTTGATCTTGCCATCTTTAGACTTCACCTAGCTGGTATCTCATCAATTTTAGGTGCAGTAAATTTTATCTCAACAGTGATCAATATACGATCAACAGGAGTTACATTTGATCGTATACCCCTATTTGTATGAGCAGTAGCAATTACTGCTCTACTCCTACTATTATCACTTCCAGTTCTAGCAGGAGCAATCACAATACTTCTAACAGATCGAAACCTTAATACCTCTTTCTTTGACCCAGCAGGAGGAGGAGACCCAATCCTATATCAACATCTATTC
>PSFOR342-13|BC-PNEF-PSFOR0314|Ampedus quercicola|COI-5P
-----------------------------------------------------------------------------------------------------------------------------------------------------------------------------------------------------------------------------------------------------------TAAGATTCTGGCTCTTACCACCTTCCTTAAGCCTTCTACTAATAAGAAGAATCGTAGAAAATGGAGCAGGAACAGGATGAACTGTATACCCACCCCTATCATCCAATATTGCCCATAGAGGTTCCTCAGTTGATCTTGCCATTTTTAGGCTTCACCTAGCTGGTATCTCATCAATTTTAGGTGCAGTAAATTTTATCTCAACAGTAATCAATATACGATCAACAGGAATTACATTTGATCGTATACCCCTATTTGTATGAGCAGTAGCAATTACTGCTCTACTCCTACTATTATCACTTCCAGTTCTAGCAGGAGCAATCACAATACTTCTAACAGATCGAAACCTTAATACCTCTTTCTTT---------------------------------------------
>PSFOR843-13|BC-PSFOR-JD0072|Ampedus quercicola|COI-5P
AACTTTGTACTTTATTTTTGGCGCGTGAGCAGGTATACTAGGAACCTCTCTAAGCCTATTAATCCGTGCCGAATTAGGAAACCCTGGTTCTCTAATTGGTAACGATCAAATCTACAACGTTATTGTAACCGCACACGCATTCATTATGATTTTCTTTATAGTAATGCCAATCATAATCGGAGGATTTGGAAATTGACTAGTCCCATTAATGCTAGGAGCCCCAGATATAGCTTTCCCCCGAATAAACAACATAAGATTCTGGCTCTTACCACCTTCCTTAAGCCTTCTACTAATAAGAAGAATCGTAGAAAATGGAGCAGGAACAGGATGAACTGTATACCCACCCCTATCATCCAATATTGCCCATAGAGGTTCCTCAGTTGATCTTGCCATTTTTAGGCTTCACCTAGCTGGTATCTCATCAATTTTAGGTGCAGTAAATTTTATCTCAACAGTAATCAATATACGATCAACAGGAATTACATTTGATCGTATACCCCTATTTGTATGAGCAGTAGCAATTACTGCTCTACTCCTACTATTATCACTTCCAGTTCTAGCAGGAGCAATCACAATACTTCTAACAGATCGA------------------------------------------------------------------
>PSFOR937-14|BC-PSFOR-JD0091|Ampedus quercicola|COI-5P
----------------------------------------------------------------------------------CCTGGTTCTCTAATTGGTAACGATCAAATCTACAACGTTATTGTAACCGCACACGCATTCATTATGATTTTCTTTATAGTAATGCCAATCATAATCGGAGGATTTGGAAATTGACTAGTCCCATTAATGCTAGGAGCCCCAGATATAGCTTTCCCCCGAATAAACAACATAAGATTCTGGCTCTTACCACCTTCCTTAAGCCTTCTACTAATAAGAAGAATCGTAGAAAATGGAGCAGGAACAGGATGAACTGTATACCCACCCCTATCATCCAATATTGCCCATAGAGGTTCCTCAGTTGATCTTGCCATTTTTAGGCTTCACCTAGCTGGTATCTCATCAATTTTAGGTGCAGTAAATTTTATCTCAACAGTAATCAATATACGATCAACAGGAATTACATTTGATCGTATACCCCTATTTGTATGAGCAGTAGCAATTACTGCTCTACTCCTACTATTATCACTTCCAGTTCTAGCAGGANCAATCACAATACTTCTAA--------------------------------------------------------------------------
>PSFOR841-13|BC-PSFOR-JD0070|Ampedus quercicola|COI-5P
-------TACTTTATTTTTGGCGCGTGAGCAGGTATACTAGGAACCTCTCTAAGCCTATTAATCCGTGCCGAATTAGGAAACCCTGGATCTCTAATTGGTAACGATCAAATCTACAACGTTATTGTAACCGCACACGCATTCATTATGATTTTCTTTATAGTAATGCCAATCATAATCGGAGGATTTGGAAATTGACTAGTCCCATTAATGCTAGGAGCCCCAGATATAGCTTTCCCCCGAATAAACAACATAAGATTCTGGCTCTTACCACCTTCCTTAAGCCTTCTACTAATAAGAAGAATCGTAGAAAATGGAGCAGGAACAGGATGAACTGTATACCCACCCCTATCATCCAATATTGCCCATAGAGGTTCCTCAGTTGATCTTGCCATTTTTAGGCTTCACCTAGCTGGTATCTCATCAATTTTAGGTGCAGTAAATTTTATCTCAACAGTAATCAATATACGATCAACAGGAATTACATTTGATCGTATACCCCTATTTGTATGAGCAGTAGCAATTACTGCTCTACTCCTACTATTATCACTTCCAGTTCTAGCAGGAGCAATCACAATACTTCTAACAGATCGAAACCTTAATACCTCTTTCTTTGACCCAGCAGGAGGAGGTGACCCAATCCTTTACCAACATCTATTC
>PSFOR842-13|BC-PSFOR-JD0071|Ampedus quercicola|COI-5P
AACTTTGTACTTTATTTTTGGCGCGTGAGCAGGTATACTAGGAACCTCTCTAAGCCTATTAATCCGTGCCGAATTAGGAAACCCTGGTTCTCTGATTGGTAACGATCAAATCTACAACGTTATTGTAACCGCACACGCATTCATTATGATTTTCTTTATAGTAATGCCAATCATAATCGGAGGATTTGGAAATTGACTAGTCCCATTAATGCTAGGAGCCCCAGATATAGCTTTCCCCCGAATAAACAACATAAGATTCTGACTCTTACCACCTTCCTTAAGTCTTCTACTAATAAGAAGAATCGTAGAAAATGGAGCAGGAACAGGATGAACTGTATACCCACCCCTATCATCCAATATTGCCCATAGAGGTTCCTCAGTTGATCTTGCCATCTTTAGACTTCACCTAGCTGGTATCTCATCAATTTTAGGTGCAGTAAATTTTATCTCAACAGTGATCAATATACGATCAACAGGAGTTACATTTGATCGTATACCCCTATTTGTATGAGCNGTAGCAATTACTGCTCTACTCCTACTATTATCACTTCCAGTTCTAGCAGGAGCAATCACAATACTTCTAACAGATCGAAACCTTAATACCTCTTTCTTTGACCCAGCAGGAGGAGGAGACCCAATCCTATATCAACATCTATTC
>PSFOR1006-14|PASSIFOR-NM13-026|Ampedus quercicola|COI-5P
AACTTTGTACTTTATTTTTGGCGCGTGAGCAGGTATACTAGGAACCTCTTTAAGCCTATTAATCCGTGCCGAATTAGGAAACCCTGGTTCTCTGATTGGTAACGATCAAATCTACAACGTTATTGTAACCGCACACGCATTCATTATGATTTTCTTTATAGTAATGCCAATCATAATCGGAGGATTTGGAAATTGACTAGTCCCATTAATGCTAGGAGCCCCAGATATAGCTTTCCCCCGAATAAACAACATAAGATTCTGACTCTTACCACCTTCCTTAAGTCTTCTACTAATAAGAAGAATCGTAGAAAATGGAGCAGGAACAGGATGAACTGTATACCCACCCCTATCATCCAATATTGCCCATAGAGGTTCCTCAGTTGATCTTGCCATCTTTAGACTTCACCTAGCTGGTATCTCATCAATTTTAGGTGCAGTAAATTTTATCTCAACAGTGATCAATATACGATCAACAGGAGTTACATTTGATCGTATACCCCTATTTGTATGAGCAGTAGCAATTACTGCTCTACTCCTACTATTATCACTTCCAGTTCTAGCAGGAGCAATCACAATACTTCTAACAGATCGAAACCTTAATACCTCTTTCTTTGACCCAGCAGGAGGAGGAGACCCAATCCTATATCAACATCTATTC
>PSFOR538-13|BC-PSFOR-JD0043|Ampedus quercicola|COI-5P
AACTTTGTACTTTATTTTTGGCGCGTGAGCAGGTATACTAGGAACCTCTCTAAGCCTATTAATCCGTGCCGAATTAGGAAACCCTGGTTCTCTGATTGGTAACGATCAAATCTACAACGTTATTGTAACCGCACACGCATTCATTATGATTTTCTTTATAGTAATGCCAATCATAATCGGAGGATTTGGAAATTGACTAGTCCCATTAATGCTAGGAGCCCCAGATATAGCTTTCCCCCGAATAAACAACATAAGATTCTGACTCTTACCACCTTCCTTAAGNCTTCTACTAATAAGAAGAATCGTAGAAAATGGAGCAGGAACAGGATGAACTGTATACCCACCCCTATCATCCAATATTGCCCATAGAGGTTCCTCAGTTGATCTTGCCATCTTTAGACTTCACCTAGCTGGTATCTCATCAATTTTAGGTGCAGTAAATTTTATCTCAACAGTGATCAATATACGATCAACAGGANTTACATTTGATCGTATACCCCTATTTGTATGAGCAGTAGCAATTACTGCTCTACTCCTACTATTATCACTTCCAGTTCTAGCAGGAGCAATCACAATACTTCTAACAGATCGAAACCTTAATACCTCTTTCTTTGACCCAGCAGGAGGAGGAGACCCAATCCTATA-------------
>PSFOR1005-14|PASSIFOR-NM13-025|Ampedus quercicola|COI-5P
AACTTTGTACTTTATTTTTGGCGCGTGAGCAGGTATACTAGGAACCTCTCTAAGCCTATTAATCCGTGCCGAATTAGGAAACCCTGGTTCTCTGATTGGTAACGATCAAATCTACAACGTTATTGTAACCGCACACGCATTCATTATGATTTTCTTTATAGTAATGCCAATCATAATCGGAGGATTTGGAAATTGACTAGTCCCATTAATGCTAGGAGCCCCAGATATAGCTTTCCCCCGAATAAACAACATAAGATTCTGACTCTTACCACCTTCCTTAAGTCTTCTACTAATAAGAAGAATCGTAGAAAATGGAGCAGGAACAGGATGAACTGTATACCCACCCCTATCATCCAATATTGCCCATAGAGGTTCCTCAGTTGATCTTGCCATCTTTAGACTTCACCTAGCTGGTATCTCATCAATTTTAGGTGCAGTAAATTTTATCTCAACAGTGATCAATATACGATCAACAGGAGTCACATTTGATCGTATACCCCTATTTGTATGAGCAGTAGCAATTACTGCTCTACTCCTACTATTATCACTTCCAGTTCTAGCAGGAGCAATCACAATACTTCTAACAGATCGAAACCTTAATACCTCTTTCTTTGACCCAGCAGGAGGAGGAGACCCAATCCTATATCAACATCTATTC
>PSFOR829-13|BC-PSFOR-JD0058|Ampedus quercicola|COI-5P
-----------------------------------------------------------------------------------------------------------------------------------------------------------------------------------------------------------------------------------------------------------TAAGATTCTGGCTCTTACCACCTTCCTTAAGCCTTCTACTAATAAGAAGAATCGTAGAAAATGGAGCAGGAACAGGATGAACTGTATACCCACCCCTATCATCCAATATTGCCCATAGAGGTTCCTCAGTTGATCTTGCCATTTTTAGGCTTCACCTAGCTGGTATCTCATCAATTTTAGGTGCAGTAAATTTTATCTCAACAGTAATCAATATACGATCAACAGGAATTACATTTGATCGTATACCCCTATTTGTATGAGCAGTAGCAATTACTGCTCTACTCCTACT----------------------------------------------------------------------------------------------------------------------
>PSFOR549-13|BS-PSFOR-BD0010|Ampedus quercicola|COI-5P
AACTTTGTACTTTATTTTTGGCGCGTGAGCAGGTATACTAGGAACCTCTCTAAGCCTATTAATCCGTGCCGAATTAGGAAACCCTGGTTCTCTAATTGGTAACGATCAAATCTACAACGTTATTGTAACCGCACACGCATTCATTATGATTTTCTTTATAGTAATGCCAATCATAATCGGAGGATTTGGAAATTGACTAGTCCCATTAATGCTAGGAGCCCCAGATATAGCTTTCCCCCGAATAAACAACATAAGATTCTGGCTCTTACCACCTTCCTTAAGCCTTCTACTAATAAGAAGAATCGTAGAAAATGGAGCAGGAACAGGATGAACTGTATACCCACCCCTATCATCCAATATTGCCCATAGAGGTTCCTCAGTTGATCTTGCCATTTTTAGGCTTCACCTAGCTGGTATCTCATCAATTTTAGGTGCAGTAAATTTTATCTCAACAGTAATCAATATACGATCAACAGGAATTACATTTGATCGTATACCCCTATTTGTATGAGCAGTAGCAATTACTGCTCTACTCCTACTATTATCACTTCCAGTTCTAGCAGGAGCAATCACAATACTTCTAACAGATCGAAACCTTAATACCTCTTTCTTTGACCCAGCAGGAGGAGGTGACCCAATCCTTTACCAACATCTATTC
>PSFOR1002-14|PASSIFOR-NM13-022|Ampedus quercicola|COI-5P
AACTTTGTACTTTATTTTTGGCGCGTGAGCAGGTATACTAGGAACCTCTCTAAGCCTATTAATCCGTGCCGAATTAGGAAACCCTGGTTCTCTGATTGGTAACGATCAAATCTACAACGTTATTGTAACCGCACACGCATTCATTATGATTTTCTTTATAGTAATGCCAATCATAATCGGAGGATTTGGAAATTGACTAGTCCCATTAATGCTAGGAGCCCCAGATATAGCTTTCCCCCGAATAAACAACATAAGATTCTGACTCTTACCACCTTCCTTAAGTCTTCTACTAATAAGAAGAATCGTAGAAAATGGAGCAGGAACAGGATGAACTGTATACCCACCCCTATCATCCAATATTGCCCATAGAGGTTCCTCAGTTGATCTTGCCATCTTTAGACTTCACCTAGCTGGTATCTCATCAATTTTAGGTGCAGTAAATTTTATCTCAACAGTGATCAATATACGATCAACAGGAGTCACATTTGATCGTATACCCCTATTTGTATGAGCAGTAGCAATTACTGCTCTACTCCTACTATTATCACTTCCAGTTCTAGCAGGAGCAATCACAATACTTCTAACAGATCGAAACCTTAATACCTCTTTCTTTGACCCAGCAGGAGGAGGAGACCC----------------------
>PSFOR541-13|BS-PSFOR-BD0002|Ampedus quercicola|COI-5P
AACTTTGTACTTTATTTTTGGCGCGTGAGCAGGTATACTAGGAACCTCTCTAAGCCTATTAATCCGTGCCGAATTAGGAAACCCTGGTTCTCTGATTGGTAACGATCAAATCTACAACGTTATTGTAACCGCACACGCATTCATTATGATTTTCTTTATAGTAATGCCAATCATAATCGGAGGATTTGGAAATTGACTAGTCCCATTAATGCTAGGAGCCCCAGATATAGCTTTCCCCCGAATAAACAACATAAGATTCTGACTCTTACCACCTTCCTTAAGTCTTCTACTAATAAGAAGAATCGTAGAAAATGGAGCAGGAACAGGATGAACTGTATACCCACCCCTATCATCCAATATTGCCCATAGAGGTTCCTCAGTTGATCTTGCCATCTTTAGACTTCACCTAGCTGGTATCTCATCAATTTTAGGTGCAGTAAATTTTATCTCAACAGTGATCAATATACGATCAACAGGAGTTACATTTGATCGTATACCCCTATTTGTATGAGCAGTAGCAATTACTGCTCTACTCCTACTATTATCACTTCCAGTTCTAGCAGGAGCAATCACAATACTTCTAACAGATCGAAACCTTAATACCTCTTTCTTTGACCCAGCAGGAGGAGGAGACCCAATCCTATATCAACATCTATTC
>PSFOR833-13|BC-PSFOR-JD0062|Ampedus rufipennis|COI-5P
AACTTTGTACTTTATCTTTGGCGCATGAGCCGGTATACTAGGTACATCCCTAAGCCTACTAATTCGCGCCGAACTAGGAAACCCCGGATCTCTAATCGGTAATGACCAAATCTACAACGTTATTGTCACTGCACACGCATTCATCATAATTTTCTTCATAGTTATGCCAATCATAATCGGAGGATTCGGAAATTGATTAGTCCCATTAATACTAGGAGCCCCAGATATAGCTTTTCCCCGAATAAACAACATAAGATTCTGACTCTTACCACCCTCATTAAGACTTCTTCTAATAAGAAGAATTGTAGAAAATGGAGCAGGAACAGGATGAACTGTGTACCCACCCCTGTCATCTAATATTGCCCACAGAGGTTCCTCAGTAGATCTTGCCATTTTCAGACTCCACCTAGCTGGTATCTCATCAATCCTAGGAGCAGTAAATTTCATCTCAACAGTAATCAACATACGATCAACAGGAATTACATTCGATCGAATACCCCTATTTGTGTGAGCAGTAGCAATCACAGCTCTACTTCTGTTATTATCACTTCCGGTTCTAGCAGGAGCAATCACAATACTTTTAACAGACCGAAATCTAAACACCTCATTCTTTGACCCAGCAGGAGGAGGAGACCCAATTCTTTACCAACACCTATTC
>PSFOR840-13|BC-PSFOR-JD0069|Ampedus rufipennis|COI-5P
AACTTTGTACTTTATCTTTGGCGCATGAGCCGGTATACTAGGTACATCCCTAAGCCTACTAATTCGCGCCGAACTAGGAAACCCCGGATCTCTAATCGGTAATGACCAAATCTACAACGTTATTGTCACTGCACACGCATTCATCATAATTTTCTTCATAGTTATGCCAATCATAATCGGAGGATTCGGAAATTGATTAGTCCCATTAATACTAGGAGCCCCAGATATAGCTTTTCCCCGAATAAACAACATAAGATTCTGACTCTTACCACCCTCATTAAGACTTCTTCTAATAAGAAGAATTGTAGAAAATGGAGCAGGAACAGGATGAACTGTGTACCCACCCCTGTCATCTAATATTGCCCACAGAGGTTCCTCAGTAGATCTTGCCATTTTCAGACTCCACCTAGCTGGTATCTCATCAATCCTAGGAGCAGTAAATTTCATCTCAACAGTAATCAACATACGATCAACAGGAATTACATTCGATCGAATACCCCTATTTGTGTGAGCAGTAGCAATCACAGCTCTACTTCTGTTATTATCACTTCCGGTTCTAGCAGGAGCAATCACAATACTTTTAACAGACCGAAATCTAAACACCTCATTCTTTGACCCAGCAGGAGGAGGAGACCCAATTCTTTACCAACACCTATTC
>PSFOR962-14|BC-PSFOR-JD0116|Ampedus rufipennis|COI-5P
AACTTTGTACTTTATCTTTGGCGCATGAGCCGGTATACTAGGTACATCCCTAAGCCTACTAATTCGCGCCGAACTAGGAAACCCCGGATCTCTAATCGGTAATGACCAAATCTACAACGTTATTGTCACTGCACACGCATTCATCATAATTTTCTTCATAGTTATGCCAATCATAATCGGAGGATTCGGAAATTGATTAGTCCCATTAATACTAGGAGCCCCAGATATAGCTTTTCCCCGAATAAACAACATAAGATTCTGACTCTTACCACCCTCATTAAGACTTCTTCTAATAAGAAGAATTGTAGAAAATGGAGCAGGAACAGGATGAACTGTGTACCCACCCCTGTCATCTAATATTGCCCACAGAGGTTCCTCAGTAGATCTTGCCATTTTCAGACTCCACCTAGCTGGTATCTCATCAATCCTAGGAGCAGTAAATTTCATCTCAACAGTAATCAACATACGATCAACAGGAATTACATTCGATCGAATACCCCTATTTGTGTGAGCAGTAGCAATCACAGCTCTACTTCTGTTATTATCACTTCCGGTTCTAGCAGGAGCAATCACAATACTTTTAACAGACCGAAATCTAAACACCTCATTCTTTGACCCAGCAGGAGGAGGAGACCCAATTCTTTACCAACACCTATTC
>PSFOR832-13|BC-PSFOR-JD0061|Ampedus rufipennis|COI-5P
------------------------------------------------------------------------------AAACCCCGGATCTCTAATAGGTAATGACCAAATCTACAACGTTATTGTCACTGCACACGCATTCATCATAATTTTCTTCATAGTTATGCCAATCATAATCGGAGGATTCGGAAATTGATTAGTCCCATTAATACTAGGAGCCCCAGACATAGCTTTCCCTCGAATGAACAACATAAGATTCTGACTCTTACCACCCTCATTAAGACTTCTTCTAATAAGAAGAATTGTAGAAAATGGAGCAGGAACAGGATGAACTGTGTACCCACCCCTGTCATCTAATATCGCCCACAGAGGTTCCTCAGTAGATCTTGCCATTTTCAGACTCCACCTAGCTGGTATCTCATCAATCCTAGGAGCAGTAAATTTCATCTCAACAGTAATCAACATACGATCAACAGGAATTACATTCGATCGAATACCCCTATTTGTGTGAGCAGTAGCAATCACAGCTCTACTTCTGTTNTTATCACTTCCGGTTCTAGCAGGAGCAATCACAATACTTTTAACAGACCGAAATCTAAACACCTCATTCTTTGACCCAGCAGGAGGAGGAGACCCAATTCTTTACCAACACCTATTC
>PSFOR941-14|BC-PSFOR-JD0095|Ampedus rufipennis|COI-5P
AACTTTGTACTTTATCTTTGGCGCATGAGCCGGTATACTAGGTACATCCCTAAGCCTACTAATTCGCGCCGAACTAGGAAACCCCGGGTCTCTAATCGGTAATGACCAAATCTACAACGTTATTGTCACTGCACACGCATTCATCATAATTTTCTTCATAGTTATGCCAATCATAATCGGAGGATTCGGAAATTGATTAGTCCCATTAATGCTAGGAGCCCCAGATATAGCTTTCCCCCGAATGAACAACATAAGATTCTGACTCTTACCACCCTCATTAAGACTTCTTCTAATAAGAAGAATTGTAGAAAATGGAGCAGGAACAGGATGAACTGTGTACCCACCCCTGTCATCTAATATTGCCCACAGAGGTTCCTCAGTAGATCTTGCCATTTTCAGACTCCACCTAGCTGGTATCTCATCAATCCTAGGAGCAGTAAATTTCATCTCAACAGTAATCAACATACGATCAACAGGAATTACATTCGATCGAATACCCCTATTTGTGTGAGCAGTGGCAATCACAGCTCTACTTCTGTTATTATCACTTCCGGTTCTAGCAGGAGCAATCACAATACTTTTAACAGACCGAAATCTAAACACCTCATTCTTTGACCCAGCAGGAGGAGGAGACCCAATTCTTTACCAACACCTATTC
>PSFOR339-13|BC-PNEF-PSFOR0311|Ampedus rufipennis|COI-5P
-------------------------------------------------------------------------------------------------------------------------------------------------------------------------------------------GGAAATTGATTAGTCCCATTAATACTAGGAGCCCCAGATATAGCTTTTCCCCGAATAAACAACATAAGATTCTGACTCTTACCACCCTCATTAAGACTTCTTCTAATAAGAAGAATTGTAGAAAATGGAGCAGGAACAGGATGAACTGTGTACCCACCCCTGTCATCTAATATTGCCCACAGAGGTTCCTCAGTAGATCTTGCCATTTTCNGACTCCACCTAGCTGGTATCTCATCAATCCTAGGAGCAGTAAATTTCATCTCAACAGTAATCAACATACGATCAACAGGAATTACATTCGATCGAATACCCCTATTTGTGTGAGCAGTAGCAATCACAGCTCTACTTCTGTTATTATCACTTCCGGTTCTAGCAGGAGCAATCACAATACTTTTAACAGACCGAAATCTAAA----------------------------------------------------------
>PSFOR1057-14|PASSIFOR-NM13-077|Ampedus sanguineus|COI-5P
AACTTTGTACTTTATCTTTGGCGCATGAGCTGGAATACTAGGAACATCCCTAAGCCTGTTAATCCGTGCCGAATTAGGAAACCCAGGATCTCTAATCGGTAATGACCAAATCTACAATGTTATTGTAACTGCACACGCATTCATCATAATTTTCTTTATAGTTATACCAATCATAATTGGAGGTTTTGGAAATTGATTAGTTCCTCTAATACTAGGAGCCCCAGATATAGCTTTCCCACGAATGAACAATATAAGATTCTGACTCCTGCCACCCTCACTAAGACTTCTACTAATAAGAAGAATTGTAGAAAATGGGGCAGGAACAGGATGAACTGTATACCCACCTCTATCATCTAATATCGCCCACAGAGGTTCCTCAGTAGATCTTGCTATTTTCAGACTTCACCTAGCTGGTATCTCATCAATCCTAGGAGCAGTAAATTTCATCTCAACAGTAATCAATATGCGATCAACAGGAATCACATTTGACCGAATACCCCTGTTTGTATGAGCAGTAGCAATTACTGCTTTACTCCTATTGCTATCACTACCGGTTCTAGCAGGAGCAATTACAATACTTTTAACAGATCGGAATCTTAATACCTCATTCTTTGATCCAGCAGGAGGAGGAGACCCAATTCTCTACCAACACCTATTC
>PSFOR845-13|BC-PSFOR-JD0074|Ampedus sanguineus|COI-5P
AACTTTGTACTTTATCTTTGGCGCATGAGCTGGAATACTAGGAACATCCCTAAGCCTGTTAATCCGTGCCGAATTAGGAAACCCAGGATCTCTAATCGGTAATGACCAAATCTACAATGTTATTGTAACTGCACACGCATTCATCATAATTTTCTTTATAGTTATACCAATCATAATTGGAGGTTTTGGAAATTGATTAGTTCCTCTAATACTAGGAGCCCCAGATATAGCTTTCCCACGAATGAACAATATAAGATTCTGACTCCTGCCACCCTCACTAAGACTTCTACTAATAAGAAGAATTGTAGAAAATGGGGCAGGAACAGGATGAACTGTATACCCACCTCTATCATCTAATATCGCCCACAGAGGTTCCTCAGTAGATCTTGCTATTTTCAGACTTCACCTAGCTGGTATCTCATCAATCCTAGGAGCAGTAAATTTCATCTCAACAGTAATCAATATGCGATCAACAGGAATCACATTTGACCGAATACCCCTGTTTGTATGAGCAGTAGCAATTACTGCTTTACTCCTATTGCTATCACTACCGGTTCTAGCAGGAGCAATTACAATACTTTTAACAGATCGGAATCTTAATACCTCATTCTTTGATCCAGCAGGAGGAGGAGACCCAATTCTCTACCAACACCTATTC
>PSFOR731-13|BC-PNEF-PSFOR0608|Ampedus sanguineus|COI-5P
-----------------------------------------------------------------------------------------------------------------------------------------------------------------------------------------------------------------------------------------------------------TAAGATTCTGACTCCTGCCACCCTCACTAAGACTTCTACTAATAAGAAGAATTGTAGAAAATGGGGCAGGAACAGGATGAACTGTATACCCACCTCTATCATCTAATATCGCCCACAGAGGTTCCTCAGTAGATCTTGCTATTTTCAGACTTCACCTAGCTGGTATCTCATCAATCCTAGGAGCAGTAAATTTCATCTCAACAGTAATCAATATGCGATCAACAGGAATCACATTTGACCGAATACCCCTGTTTGTATGAGCAGTAGCAATTACTGCTTTACTCCTATTGCTATCACTACCGGTTCTAGCAGGAGCAATTACAATACTTTTA---------------------------------------------------------------------------
>PSFOR844-13|BC-PSFOR-JD0073|Ampedus sanguineus|COI-5P
AACTTTGTACTTTATCTTTGGCGCATGAGCTTGAATACTAGGAACATCCCTAAGCCTGTTAATCCGTGCCGAATTAGGAAACCCAGGATCTCTAATCGGTAATGACCAAATCTACAATGTTATTGTAACTGCACACGCATTCATCATAATTTTCTTTATAGTTATACCAATCATAATTGGAGGTTTTGGAAATTGATTAGTTCCTCTAATACTAGGAGCCCCAGATATAGCTTTCCCACGAATGAACAATATAAGATTCTGACTCCTGCCACCCTCACTGAGACTTCTACTAATAAGAAGAATTGTAGAAAATGGGGCAGGAACAGGATGAACTGTATACCCACCTCTATCATCTAATATCGCCCACAGAGGTTCCTCAGTAGATCTTGCTATTTTCAGACTTCACCTAGCTGGTATCTCATCAATCCTAGGAGCAGTAAATTTCATCTCAACAGTAATCAATATGCGATCAACAGGAATCACATTTGACCGAATACCCCTGTTTGTATGAGCAGTAGCAATTACTGCTTTACTCCTATTGCTATCACTACCGGTTCTAGCAGGAGCAATTACAATACTTTTAACAGATCGGAATCTTAATACCTCATTCTTTGATCCAGCAGGAGGAGGAGACCCAATTCTCTACCAACACCTGTTC
>PSFOR1003-14|PASSIFOR-NM13-023|Ampedus sanguineus|COI-5P
AACTTTGTACTTTATCTTTGGCGCATGAGCTGGAATACTAGGAACATCCCTAAGCCTGTTAATCCGTGCCGAATTAGGAAACCCAGGATCTCTAATCGGTAATGACCAAATCTACAATGTTATTGTAACTGCACACGCATTCATCATAATTTTCTTTATAGTTATACCAATCATAATTGGAGGTTTTGGAAATTGATTAGTTCCTCTAATACTAGGAGCCCCAGATATAGCTTTCCCACGAATGAACAATATAAGATTCTGACTCCTGCCACCCTCACTAAGACTTCTACTAATAAGAAGAATTGTAGAAAATGGGGCAGGAACAGGATGAACTGTATACCCACCTCTATCATCTAATATCGCCCACAGAGGTTCCTCAGTAGATCTTGCTATTTTCAGACTTCACCTAGCTGGTATCTCATCAATCCTAGGAGCAGTAAATTTCATCTCAACAGTAATCAATATGCGATCAACAGGAATCACATTTGACCGAATACCCCTGTTTGTATGAGCAGTAGCAATTACTGCTTTACTCCTATTGCTATCACTACCGGTTCTAGCAGGAGCAATTACAATACTTTTAACAGATCGGAATCTTAATACCTCATTCTTTGATCCAGCAGGAGGAGGAGACCCAATTCTCTACCAACACCTATTC
>PSFOR839-13|BC-PSFOR-JD0068|Ampedus sanguinolentus|COI-5P
AACTTTATACTTTATTTTTGGTGCATGGGCAGGTATACTAGGAACATCCCTAAGTCTATTAATCCGTGCCGAATTAGGAAACCCCGGATCACTAATTGGTAACGACCAAATTTATAACGTTATTGTAACTGCACATGCATTCATCATAATTTTCTTTATAGTTATGCCAATCATAATCGGAGGATTTGGAAATTGATTAGTCCCATTAATGCTAGGAGCCCCAGACATAGCTTTCCCCCGAATAAACAACATAAGATTCTGACTCTTACCACCCTCATTAAGACTTCTCCTAATAAGAAGAATTGTAGAAAACGGAGCAGGAACAGGATGAACTGTATACCCACCCCTTTCATCCAACATTGCCCACAGAGGTTCCTCAGTAGATCTGGCTATTTTCAGTCTTCACCTAGCTGGTATCTCGTCAATTCTAGGAGCAGTAAATTTCATCTCCACAGTAATTAATATACGATCAACAGGAATTACATTTGATCGTATACCTCTATTTGTATGAGCAGTAGCAATCACTGCTCTACTTCTGTTATTATCCCTTCCAGTTCTTGCAGGAGCAATCACGATACTTTTAACAGACCGGAATTTAAATACCTCCTTTTTCGACCCAGCAGGAGGAGGAGACCCAATTCTTTATCAACATTTATTC
>PSFOR516-13|BC-PSFOR-JD0021|Ampedus scrofa|COI-5P
-----------------------------------------------------------------------------------------------------------------------------------------------------------------------------------------------------------------------------------------------------------TAAGATTCTGACTCTTACCACCTTCCCTAAGATTACTTCTAATAAGAAGAATTGTAGAAAACGGCGCAGGAACAGGATGAACTGTGTACCCACCACTTTCATCAAACATTGCCCATAGAGGTTCCTCAGTAGATTTAGCAATCTTTAGCTTACATCTAGCTGGTATCTCATCAATTCTAGGAGCCGTAAATTTTATCTCAACAGTAATCAACATACGATCAACAGGAATCACATTTGACCGAATACCATTATTCGTGTGAGCAGTAGCAATTACAGCCCTACTCCTACTATTATCACTCCCAGTCCTTGCCGGAGCAATCACAATACTTCTAACAGACCGAAATCTGAATACCTCATTCTTTGACCCGGCAGGAGGAGGAGATCCTATTCTGTACCAACACCTATTT
>PSFOR508-13|BC-PSFOR-JD0013|Ampedus scrofa|COI-5P
AACTTTATACTTTATCTTTGGAGCATGGGCCGGTATACTAGGAACATCCCTAAGCCTCTTAATCCGTGCCGAATTAGGAAACCCCGGATCCTTAATCGGTAACGACCAAATCTATAATGTTATTGTAACTGCACATGCATTCATTATAATCTTCTTCATAGTTATACCCATCATAATCGGAGGATTTGGAAATTGATTAGTACCATTAATGCTAGGAGCCCCAGATATAGCTTTCCCCCGAATAAACAACATAAGATTCTGACTCTTACCACCTTCCCTAAGATTACTTCTAATAAGAAGAATTGTAGAAAACGGGGCAGGAACAGGATGAACTGTGTACCCACCACTTTCATCAAACATTGCCCATAGAGGTTCCTCAGTAGATTTAGCAATCTTTAGCTTACATCTAGCTGGTATCTCATCAATTCTAGGAGCCGTAAATTTTATCTCAACAGTAATCAACATACGATCAACAGGAATCACATTTGACCGAATACCATTATTCGTGTGAGCAGTAGCAATTACAGCCCTCCTCCTACTATTATCACTCCCAGTCCTTGCCGGAGCAATCACAATACTTCTAACAGACCGAAATCTGAATACCTCATTCTTTGACCCAGCAGGAGGAGGAGATCCTATTCTGTACCAACACCTATTT
>PSFOR512-13|BC-PSFOR-JD0017|Ampedus scrofa|COI-5P
-----------------------------------------------------------------------------------------------------------------------------------------------------------------------------------------------------------------------------------------------------------TAAGATTCTGACTCTTACCACCTTCCCTAAGATTACTTCTAATAAGAAGAATTGTAGAAAACGGCGCAGGAACAGGATGAACTGTGTACCCACCACTTTCATCAAACATTGCCCATAGAGGTTCCTCAGTAGATTTAGCAATCTTTAGCTTACATCTAGCTGGTATCTCATCAATTCTAGGAGCCGTAAATTTTATCTCAACAGTAATCAACATACGATCAACAGGAATCACATTTGACCGAATACCATTATTCGTGTGAGCAGTAGCAATTACAGCCCTACTCCTACTATTATCACTCCCAGTCCTTGCCGGAGCAATCACAATACTTCTAACAGACCGAAATCTGAATACCTCATTCTTTGACCCAGCAGGAGGAGGAGATCCTATTCTGTACCAACACCTATTT
>PSFOR502-13|BC-PSFOR-JD0007|Ampedus scrofa|COI-5P
-----------------------------------------------------------------------------------------------------------------------------------------------------------------------------------------------------------------------------------------------------------TAAGATTCTGACTCTTACCACCTTCCCTAAGATTACTTCTAATAAGAAGAATTGTAGAAAACGGCGCAGGAACAGGATGAACTGTGTACCCACCACTTTCATCAAACATTGCCCATAGAGGTTCCTCAGTAGATTTAGCAATCTTTAGCTTACATCTAGCTGGTATCTCATCAATTCTAGGAGCCGTAAATTTTATCTCAACAGTAATCAACATACGATCAACAGGAATCACATTTGACCGAATACCATTATTCGTGTGAGCAGTAGCAATTACAGCCCTACTCCTACTATTATCACTCCCAGTCCTTGCCGGAGCAATCACAATACTTCTAACAGACCGAAATCTGAATACCTCATTCTTTGACCCAGCAGGA---------------------------------
>PSFOR522-13|BC-PSFOR-JD0027|Ampedus scrofa|COI-5P
AACCTTATACTTTATCTTTGGAGCATGGGCCGGTATACTAGGAACATCCCTAAGCCTCTTAATCCGTGCCGAATTAGGAAACCCCGGATCCTTAATCGGTAACGACCAAATCTATAATGTTATCGTAACTGCACATGCATTCATTATAATCTTCTTCATAGTTATACCCATCATAATCGGAGGATTTGGAAATTGATTAGTACCATTAATGCTAGGAGCCCCAGATATAGCTTTCCCCCGAATAAACAACATAAGATTCTGACTCTTACCACCTTCCCTAAGATTACTTCTAATAAGAAGAATTGTAGAAAACGGCGCAGGAACAGGATGAACTGTGTACCCACCACTTTCATCAAACATTGCCCATAGAGGTTCCTCAGTAGATTTAGCAATCTTTAGCTTACATCTAGCTGGTATCTCATCAATTCTAGGAGCCGTAAATTTTATCTCAACAGTAATCAACATACGATCAACAGGAATCACATTTGACCGAATACCATTATTCGTGTGAGCAGTAGCAATTACAGCCCTACTCCTACTATTATCACTCCCAGTCCTTGCCGGAGCAATCACAATACTTCTAACAGACCGAAATCTGAATACCTCATTCTTTGACCCAGCAGGAGGAGGAGATCCTATTCTGTACCAACACCTATTT
>PSFOR521-13|BC-PSFOR-JD0026|Ampedus scrofa|COI-5P
AACCTTATACTTTATCTTTGGAGCATGGGCCGGTATACTAGGAACATCCCTAAGCCTCTTAATCCGTGCCGAATTAGGAAACCCCGGATCCTTAATCGGTAACGACCAAATCTATAATGTTATCGTAACTGCACATGCATTCATTATAATCTTCTTCATAGTTATACCCATCATAATCGGAGGATTTGGAAATTGATTAGTACCATTAATGCTAGGAGCCCCAGATATAGCTTTCCCCCGAATAAACAACATAAGATTCTGACTCTTACCACCTTCCCTAAGATTACTTCTAATAAGAAGAATTGTAGAAAACGGCGCAGGAACAGGATGAACTGTGTACCCACCACTTTCATCAAACATTGCCCATAGAGGTTCCTCAGTAGATTTAGCAATCTTTAGCTTACATCTAGCTGGTATCTCATCAATTCTAGGAGCCGTAAATTTTATCTCAACAGTAATCAACATACGATCAACAGGAATCACATTTGACCGAATACCATTATTCGTGTGAGCAGTAGCAATTACAGCCCTACTCCTACTATTATCACTCCCAGTCCTTGCCGGAGCAATCACAATACTTCTAACAGACCGAAATCTGAATACCTCATTCTTTGACCCAGCAGGAGGAGGAGATCCTATTCTGTACCAACACCTATTT
>PSFOR518-13|BC-PSFOR-JD0023|Ampedus scrofa|COI-5P
------------------------------CGGTATACTAGGAACATCCCTAAGCCTCTTAATCCGTGCCGAATTAGGAAACCCCGGATCCTTAATCGGTAACGACCAAATCTATAATGTTATTGTAACTGCACATGCATTCATTATAATCTTCTTCATAGTTATACCCATCATAATCGGAGGATTTGGAAATTGATTAGTACCATTAATGCTAGGAGCCCCAGATATAGCTTTCCCCCGAATAAACAACATAAGATTCTGACTCTTACCACCTTCCCTAAGATTACTTCTAATAAGAAGAATTGTAGAAAACGGGGCAGGAACAGGATGAACTGTGTACCCACCACTTTCATCAAACATTGCCCATAGAGGTTCCTCAGTAGATTTAGCAATCTTTAGCTTACATCTAGCTGGTATCTCATCAATTCTAGGAGCCGTAAATTTTATCTCAACAGTAATCAACATACGATCAACAGGAATCACATTTGACCGAATACCATTATTCGTGTGAGCAGTAGCAATTACAGCCCTCCTCCTACTATTATCACTCCCAGTCCTTGCCGGAGCAATCACAATACTTCTAACAGACCGAAATCTGAATACCTCATTCTTTGACC-----------------------------------------
>PSFOR520-13|BC-PSFOR-JD0025|Ampedus scrofa|COI-5P
-----------------------------------------------------------------------------------------------------------------------------------------------------------------------------------------------------------------------------------------------------------TAAGATTCTGACTCTTACCACCTTCCCTAAGGTTACTTCTAATAAGAAGAATTGTAGAAAACGGAGCAGGAACAGGATGAACTGTGTACCCACCACTTTCATCAAACATTGCCCATAGAGGTTCCTCAGTAGATTTAGCAATCTTTAGCTTACATCTAGCTGGTATCTCATCAATTCTAGGAGCCGTAAATTTTATCTCAACAGTAATCAACATACGATCAACAGGAATCACATTTGACCGAATACCATTATTCGTGTGAGCAGTAGCAATTACAGCCCTCCTCCTACTATTATCACTCCCAGTCCTTGCCGGAGCAATCACAATACTTCTAACAGACCGAAATCTGAATACCTCATTCTTTGACCCAGCAGGAGGAGGAGATCCTATTCTGTACCAACACCTATTT
>PSFOR818-13|BC-PSFOR-JD0047|Ampedus scrofa|COI-5P
-----------------------------------------------------------------------------------------------------------------------------------------------------------------------------------------------------------------------------------------------------------TAAGATTCTGACTCTTACCACCTTCCCTAAGATTACTTCTAATAAGAAGAATTGTAGAAAACGGCGCAGGAACAGGATGAACTGTGTACCCACCACTTTCATCAAACATTGCCCATAGAGGTTCCTCAGTAGATTTAGCAATCTTTAGCTTACATCTAGCTGGTATCTCATCAATCCTAGGAGCCGTAAATTTTATCTCAACAGTAATCAACATACGATCAACAGGAATCACATTTGACCGAATACCATTATTCGTGTGAGCAGTAGCAATTACAGCCCTACTCCTACTATTATCACTCCCAGTCCTTGCCGGAGCAATCACAATACTTCTAACAGACCGAAATCTGAATACCTC----------------------------------------------------
>PSFOR524-13|BC-PSFOR-JD0029|Ampedus scrofa|COI-5P
-----------------------------------------------------------------------------------------------------------------------------------------------------------------------------------------------------------------------------------------------------------TAAGATTCTGACTCTTACCACCTTCCCTAAGATTACTTCTAATAAGAAGAATTGTAGAAAACGGCGCAGGAACAGGATGAACTGTGTACCCACCACTTTCATCAAACATTGCCCATAGAGGTTCCTCAGTAGATTTAGCAATCTTTAGCTTACATCTAGCTGGTATCTCATCAATTCTAGGAGCCGTAAATTTTATCTCAACAGTAATCAACATACGATCAACAGGAATCACATTTGACCGAATACCATTATTCGTGTGAGCAGTAGCAATTACAGCCCTCCTCCTACTATTATCACTCCCAGTCCTTGCCGGAGCAATCACAATACTTCTAACAGACCGAAATCTGAATACCTCATTCTTTGACCCGGCAGGAGGAGGAGATCCTATTCTGTACCAACACCTATTT
>PSFOR819-13|BC-PSFOR-JD0048|Ampedus scrofa|COI-5P
AACCTTATACTTTATCTTTGGAGCATGGGCCGGTATACTAGGAACATCCCTAAGCCTCTTAATCCGTGCCGAATTAGGAAACCCAGGATCTTTAATCGGTAACGACCAAATCTATAATGTTATTGTAACTGCACATGCATTCATTATAATCTTCTTCATAGTTATACCCATCATAATCGGAGGATTTGGAAATTGATTAGTACCATTAATGCTAGGAGCCCCAGATATAGCTTTCCCCCGAATAAACAACATAAGATTCTGACTCTTACCGCCTTCCCTAAGATTACTTCTAATAAGAAGAATTGTAGAAAACGGGGCAGGAACAGGATGAACTGTGTACCCACCACTTTCATCAAACATTGCCCATAGAGGTTCCTCAGTAGATTTAGCAATCTTTAGCTTACATCTAGCTGGTATCTCATCAATTCTAGGAGCCGTAAATTTTATCTCAACAGTAATCAACATACGATCAACAGGAATCACATTTGACCGAATACCATTATTCGTGTGAGCAGTAGCAATTACAGCCCTCCTCCTACTATTATCACTTCCAGTCCTAGCCGGAGCAATCACAATACTTCTAACAGACCGAAATCTGAATACCTCATTCTTTGACCCAGCAGGAGGAGGAGATCCTATTCTATACCAACACCTATTT
>PSFOR504-13|BC-PSFOR-JD0009|Ampedus scrofa|COI-5P
-----------------------------------------------------------------------------------------------------------------------------------------------------------------------------------------------------------------------------------------------------------TAAGATTCTGACTCTTACCACCTTCCCTAAGATTACTTCTAATAAGAAGAATTGTAGAAAACGGCGCAGGAACAGGATGAACTGTGTACCCACCACTTTCATCAAACATTGCCCATAGAGGTTCCTCAGTAGATTTAGCAATCTTTAGCTTACATCTAGCTGGTATCTCATCAATTCTAGGAGCCGTAAATTTTATCTCAACAGTAATCAACATACGATCAACAGGAATCACATTTGACCGAATACCATTATTCGTGTGAGCAGTAGCAATTACAGCCCTACTCCTACTATTATCACTCCCAGTCCTTGCCGGAGCAATCACAATACTTCTAACAGACCGAAATCTGAATACCTCATTCTTTGACCCAGCAGGA---------------------------------
>PSFOR517-13|BC-PSFOR-JD0022|Ampedus scrofa|COI-5P
-----------------------------------------------------------------------------------------------------------------------------------------------------------------------------------------------------------------------------------------------------------TAAGATTCTGACTCTTACCACCTTCCCTAAGATTACTTCTAATAAGAAGAATTGTAGAAAACGGCGCAGGAACAGGATGAACTGTGTACCCACCACTTTCATCAAACATTGCCCATAGAGGTTCCTCAGTAGATTTAGCAATCTTTAGCTTACATCTAGCTGGTATCTCATCAATTCTAGGAGCCGTAAATTTTATCTCAACAGTAATCAACATACGATCAACAGGAATCACATTTGACCGAATACCATTATTCGTGTGAGCAGTAGCAATTACAGCCCTACTCCTACTATTATCACTCCCAGTCCTTGCCGGAGCAATCACAATACTTCTAACAGACCGAAATCTGAATACCTCATTCTTTGACCCGGCAGGAGGAGGAGATCCTATTCTGTACCAACACCTATTT
>PSFOR510-13|BC-PSFOR-JD0015|Ampedus scrofa|COI-5P
AACCTTATACTTTATCTTTGGAGCATGGGCCGGTATACTAGGAACATCCCTAAGCCTCTTAATCCGTGCCGAATTAGGAAACCCCGGATCCTTAATCGGTAACGACCAAATCTATAATGTTATCGTAACTGCACATGCATTCATTATAATCTTCTTCATAGTTATACCCATCATAATCGGAGGATTTGGAAATTGATTAGTACCATTAATGCTAGGAGCCCCAGATATAGCTTTCCCCCGAATAAACAACATAAGATTCTGACTCTTACCACCTTCCCTAAGATTACTTCTAATAAGAAGAATTGTAGAAAACGGCGCAGGAACAGGATGAACTGTGTACCCACCACTTTCATCAAACATTGCCCATAGAGGTTCCTCAGTAGATTTAGCAATCTTTAGCTTACATCTAGCTGGTATCTCATCAATTCTAGGAGCCGTAAATTTTATCTCAACAGTAATCAACATACGATCAACAGGAATCACATTTGACCGAATACCATTATTCGTGTGAGCAGTAGCAATTACAGCCCTACTCCTACTATTATCACTCCCAGTCCTTGCCGGAGCAATCACAATACTTCTAACAGACCGAAATCTGAATACCTCATTCTTTGACCCAGCAGGAGGAGGAGATCCTATTCTGTACCAACACCTATTT
>PSFOR503-13|BC-PSFOR-JD0008|Ampedus scrofa|COI-5P
AACCTTATACTTTATCTTTGGAGCATGGGCCGGTATACTAGGAACATCCCTAAGCCTCTTAATCCGTGCCGAATTAGGAAACCCCGGATCCTTAATCGGTAACGACCAAATCTATAATGTTATCGTAACTGCACATGCATTCATTATAATCTTCTTCATAGTTATACCCATCATAATCGGAGGATTTGGAAATTGATTAGTACCATTAATGCTAGGAGCCCCAGATATAGCTTTCCCCCGAATAAACAACATAAGATTCTGACTCTTACCACCTTCCCTAAGATTACTTCTAATAAGAAGAATTGTAGAAAACGGCGCAGGAACAGGATGAACTGTGTACCCACCACTTTCATCAAACATTGCCCATAGAGGTTCCTCAGTAGATTTAGCAATCTTTAGCTTACATCTAGCTGGTATCTCATCAATTCTAGGAGCCGTAAATTTTATCTCAACAGTAATCAACATACGATCAACAGGAATCACATTTGACCGAATACCATTATTCGTGTGAGCAGTAGCAATTACAGCCCTACTCCTACTATTATCACTCCCAGTCCTTGCCGGAGCAATCACAATACTTCTAACAGACCGAAATCTGAATACCTCATTCTTTGACCCAGCAGGAGGAGGAGATCCTATTCTGTACCAACACCTATTT
>PSFOR511-13|BC-PSFOR-JD0016|Ampedus scrofa|COI-5P
-----------------------------------------------------------------------------------------------------------------------------------------------------------------------------------------------------------------------------------------------------------------------------------------------------------------TAGAAAACGGCGCAGGAACAGGATGAACTGTGTACCCNCCACTTTCATCAAACATTGCCCATAGAGGTTCCTCAGTAGATTTAGCAATCTTTAGCTTACATCTAGCTGGTATNTCATCAATTNTAGGAGCCGTAAATTTTATCTCAACAGTAATCAACATACGATCAACAGGAATCACATTTGACCGAATACCATTATTCGTGTGAGCAGTAGCAATTACAGCCCTACTCCTACTATTATCACTCCCAGTCCTNGCCGGAGCAATCACAATACTTCTAACAGACCGAAATCTGAATACCT-----------------------------------------------------
>PSFOR507-13|BC-PSFOR-JD0012|Ampedus scrofa|COI-5P
AACTTTATACTTTATCTTTGGAGCATGGGCCGGTATACTAGGAACATCCCTAAGCCTCTTAATCCGTGCCGAATTAGGAAACCCCGGATCCTTAATCGGTAACGACCAAATCTATAATGTTATTGTAACTGCACATGCATTCATTATAATCTTCTTCATAGTTATACCCATCATAATCGGAGGATTTGGAAATTGATTAGTACCATTAATGCTAGGAGCCCCAGATATAGCTTTCCCCCGAATAAACAACATAAGATTCTGACTCTTACCACCTTCCCTAAGATTACTTCTAATAAGAAGAATTGTAGAAAACGGGGCAGGAACAGGATGAACTGTGTACCCACCACTTTCATCAAACATTGCCCATAGAGGTTCCTCAGTAGATTTAGCAATCTTTAGCTTACATCTAGCTGGTATCTCATCAATTCTAGGAGCCGTAAATTTTATCTCAACAGTAATCAACATACGATCAACAGGAATCACATTTGACCGAATACCATTATTCGTGTGAGCAGTAGCAATTACAGCCCTCCTCCTACTATTATCACTCCCAGTCCTTGCCGGAGCAATCACAATACTTCTAACAGACCGAAATCTGAATACCTCATTCTTTGACCCAGCAGGAGGAGGAGATCCTATTCTGTACCAACACCTATTT
>PSFOR519-13|BC-PSFOR-JD0024|Ampedus scrofa|COI-5P
AACCTTATACTTTATCTTTGGAGCATGGGCCGGTATACTAGGAACATCCCTAAGCCTCTTAATCCGTGCCGAATTAGGAAACCCCGGATCCTTAATCGGTAACGACCAAATCTATAATGTTATCGTAACTGCACATGCATTCATTATAATCTTCTTCATAGTTATACCCATCATAATCGGAGGATTTGGAAATTGATTAGTACCATTAATGCTAGGAGCCCCAGATATAGCTTTCCCCCGAATAAACAACATAAGATTCTGACTCTTACCACCTTCCCTAAGATTACTTCTAATAAGAAGAATTGTAGAAAACGGCGCAGGAACAGGATGAACTGTGTACCCACCACTTTCATCAAACATTGCCCATAGAGGTTCCTCAGTAGATTTAGCAATCTTTAGCTTACATCTAGCTGGTATCTCATCAATTCTAGGAGCCGTAAATTTTATCTCAACAGTAATCAACATACGATCAACAGGAATCACATTTGACCGAATACCATTATTCGTGTGAGCAGTAGCAATTACAGCCCTACTCCTACTATTATCACTCCCAGTCCTTGCCGGAGCAATCACAATACTTCTAACAGACCGAAATCTGAATACCTCATTCTTTGACCCAGCAGGAGGAGGAGATCCTATTCTGTACCAACACCTATTT
>PSFOR733-13|BC-PNEF-PSFOR0610|Ampedus sinuatus|COI-5P
AACTCTATACTTCATCTTTGGAGCATGGGCAGGTATGCTAGGTACATCCCTAAGCCTACTAATTCGTGCCGAATTAGGAAACCCCGGATCCTTAATTGGCAATGATCAGATCTATAATGTTATTGTTACCGCACATGCATTCATCATAATTTTCTTCATAGTTATACCAATTATAATCGGTGGATTCGGAAATTGATTAGTACCATTAATGCTAGGAGCCCCAGACATAGCATTCCCCCGAATAAACAACATAAGATTTTGACTACTACCCCCCTCGCTAAGGTTACTTCTAATAAGAAGAATCGTAGAAAACGGAGCAGGAACAGGATGAACAGTGTACCCCCCACTTTCATCAAATATTGCCCACAGAGGATCCTCAGTAGACCTTGCAATTTTCAGACTACACCTAGCAGGAATTTCATCAATCCTAGGAGCAGTAAATTTCATCTCAACCGTAATCAACATACGATCAACAGGAATTTCATTTGACCGAATACCCCTATTTGTATGAGCAGTAGCAATCACAGCTCTACTCCTCCTTCTATCACTACCTGTCCTTGCCGGAGCAATCACAATACTTTTAACAGACCGGAACCTAAATACCTCATTCTTTGACCCAGCTGGGGGAGGTGACCCCAT-------------------
>PSFOR032-13|BC-PNEF-PSFOR0004|Anaesthetis testacea|COI-5P
-----------------------------------------------------------TTATTCGTTCAGAATTAGGAAATCCAGGTTCATTAATTGGAGACGATCAAATTTATAATGTTATTGTCACTGCCCATGCTTTTATTATAATTTTTTTTATAGTAATACCTATTATAATTGGAGGATTTGGAAATTGATTAGTTCCTTTAATATTAGGAGCCCCAGATATAGCCTTTCCCCGAATAAATAATATAAGATTTTGACTTTTACCACCTTCATTAACTTTATTAATTATAAGAAGAATCGTTGAGAATGGAGCAGGAACAGGATGAACTGTATATCCACCTCTTTCAGCCAATATCGCCCATAATGGATCATCAGTTGATTTAGCAATTTTTAGCCTTCACTTAGCAGGAATTTCTTCAATTTTAGGAGCAGTAAATTTTATTACAACAGTAATTAATATACGACCTAAAGGAATAACCTTTGACCGTTTACCATTATTTGTATGAGCAGTAAAAATTACTGCAATTCTTCTATTACTTTCTTTGCCTGTATTAGCAGGTGCAATTACCATGCTTTTAACAGACCGAAATTTAAATACCTCCTTTTTTGAC------------------------------------------
>PSFOR018-13|BC-PASSIFOR0018|Anaglyptus mysticus|COI-5P
AACACTATATTTCATCTTTGGTGCATGAGCCGGGATAGTAGGAACCTCCCTAAGTATATTAATTCGATCAGAACTGGGTAACCCAGGATCCCTAATCGGAGATGATCAAATCTACAATGTTATCGTTACAGCACATGCATTTATTATAATTTTCTTCATAGTTATACCAATTATAATTGGTGGATTCGGAAATTGACTAGTACCACTAATATTAGGAGCCCCTGATATAGCATTCCCACGTATAAATAATATAAGATTTTGACTACTCCCGCCCTCACTAACCTTATTAATTATAAGAAGTATTGTTGAAAATGGAGCAGGAACAGGATGAACAGTTTATCCCCCTTTATCTGCAAATGTAGCCCATAGAGGATCATCTGTAGATTTAGCAATTTTTAGATTACATTTAGCAGGAATTTCATCAATCCTAGGGGCAGTAAATTTTATTTCTACAGTAATTAATATACGACCAACAGGTATAACCCCTGAACAAATACCTTTATTTGTATGAGCAGTAGTAATTACAGCAATCCTACTTTTATTATCTCTACCAGTTCTAGCAGGAGCTATTACTATACTCCTAACAGATCGAAATATTAATACATCTTTCTTTGACCCAGCAGGAGGGGGAGACCCAATTCTTTACCAACATTTATTC
>PSFOR026-13|BC-PASSIFOR0026|Anaglyptus mysticus|COI-5P
AACACTATATTTCATCTTTGGTGCATGAGCCGGGATAGTAGGAACCTCCCTAAGTATATTAATTCGATCAGAACTGGGTAACCCAGGATCCCTAATCGGAGATGATCAAATCTACAATGTTATCGTTACAGCACATGCATTTATTATAATTTTCTTCATAGTTATACCAATTATAATTGGTGGATTCGGAAATTGACTAGTACCACTAATATTAGGAGCCCCTGATATAGCATTCCCACGTATAAATAATATAAGATTTTGACTACTCCCGCCCTCACTAACCTTATTAATTATAAGAAGTATTGTTGAAAATGGAGCAGGAACAGGATGAACAGTTTATCCCCCTTTATCTGCAAATGTAGCCCATAGAGGATCATCTGTAGATTTAGCAATTTTTAGATTACATTTAGCAGGAATTTCATCAATCCTAGGGGCAGTAAATTTTATTTCTACAGTAATTAATATACGACCAACAGGTATAACCCCTGAACAAATACCTTTATTTGTATGAGCAGTAGTAATTACAGCAATCCTACTTTTATTATCTCTACCAGTTCTAGCAGGAGCTATTACTATACTCCTAACAGATCGAAATATTAATACATCTTTCTTTGACCCAGCAGGAGGGGGAGACCCAATTCTTTACCAACATTTATTC
>PSFOR441-13|BC-PNEF-PSFOR0413|Anaglyptus mysticus|COI-5P
AACACTATATTTCATCTTTGGTGCATGAGCCGGGATAGTAGGAACCTCCCTAAGTATATTAATTCGATCAGAACTGGGTAACCCAGGATCCCTAATCGGAGATGATCAAATCTACAATGTTATCGTTACAGCACATGCATTTATTATAATTTTCTTCATAGTTATACCAATTATAATTGGTGGATTCGGAAATTGACTAGTACCACTAATATTAGGAGCCCCTGATATAGCATTCCCACGTATAAATAATATAAGATTTTGACTACTCCCGCCCTCACTAACCTTATTAATTATAAGAAGTATTGTTGAAAATGGAGCAGGAACAGGATGAACAGTTTATCCCCCTTTATCTGCAAATGTAGCCCATAGAGGATCATCTGTAGATTTAGCAATTTTTAGATTACATTTAGCAGGAATTTCATCAATCCTAGGGGCAGTAAATTTTATTTCTACAGTAATTAATATACGACCAACAGGTATAACCCCTGAACAAATACCTTTATTTGTATGAGCAGTAGTAATTACAACAATCCTACTTTTATTATCTCTACCAGTTCTAGCAGGAGCTATTACTATACTCCTAACAGATCGAAATATTAATACATCTTTCTTTGACCCAGCAGGAGGGGGAGACCCAATTCTTTACCAACATTTATTC
>PSFOR035-13|BC-PNEF-PSFOR0007|Anaglyptus mysticus|COI-5P
AACACTATATTTCATCTTTGGTGCATGAGCCGGGATAGTAGGAACCTCCCTAAGTATATTAATTCGATCAGAACTGGGTAACCCAGGATCCCTAATCGGAGATGATCAAATCTACAATGTTATCGTTACAGCACATGCATTTATTATAATTTTCTTCATAGTTATACCAATTATAATTGGTGGATTCGGAAATTGACTAGTACCACTAATATTAGGAGCCCCTGATATAGCATTCCCACGTATAAATAATATAAGATTTTGACTACTCCCGCCCTCACTAACCTTATTAATTATAAGAAGTATTGTTGAAAATGGAGCAGGAACAGGATGAACAGTTTATCCCCCTTTATCTGCAAATGTAGCCCATAGAGGATCATCTGTAGATTTAGCAATTTTTAGATTACATTTAGCAGGAATTTCATCAATCCTAGGGGCAGTAAATTTTATTTCTACAGTAATTAATATACGACCAACAGGTATAACCCCTGAACAAATACCTTTATTTGTATGAGCAGTAGTAATTACAGCAATCCTACTTTTATTATCTCTACCAGTTCTAGCAGGAGCTATTACTATACTCCTAACAGATCGAAATATTAATACATCTTTCTTTGACCCAGCAGGAGGGGGAGACCCAATTCTTTACCAACATTTATTC
>PSFOR034-13|BC-PNEF-PSFOR0006|Anaglyptus mysticus|COI-5P
AACACTATATTTCATCTTTGGTGCATGAGCCGGGATAGTAGGAACCTCCCTAAGTATATTAATTCGATCAGAACTGGGTAACCCAGGATCCCTAATCGGAGATGATCAAATCTACAATGTTATCGTTACAGCACATGCATTTATTATAATTTTCTTCATAGTTATACCAATTATAATTGGTGGATTCGGAAATTGACTAGTACCACTAATATTAGGAGCCCCTGATATAGCATTCCCACGTATAAATAATATAAGATTTTGACTACTCCCGCCCTCACTAACCTTATTAATTATAAGAAGTATTGTTGAAAATGGAGCAGGAACAGGATGAACAGTTTATCCCCCTTTATCTGCAAATGTAGCCCATAGAGGATCATCTGTAGATTTAGCAATTTTTAGATTACATTTAGCAGGAATTTCATCAATCCTAGGGGCAGTAAATTTTATTTCTACAGTAATTAATATACGACCAACAGGTATAACCCCTGAACAAATACCTTTATTTGTATGAGCAGTAGTAATTACAGCAATCCTACTTTTATTATCTCTACCAGTTCTAGCAGGAGCTATTACTATACTCCTAACAGATCGAAATATTAATACATCTTTCTTTGACCCAGCAGGAGGGGGAGACCCAATTCTTTACCAACATTTATTC
>PSFOR102-13|BC-PNEF-PSFOR0074|Anastrangalia dubia|COI-5P
TACTTTATATTTTATTTTTGGAGCTTGGGCAAGAATAGTAGGAACATCCTTAAGACTCCTAATTCGTTCTGAATTAGGAAATCCCGGATCATTAATTGGTGATGACCAAATTTATAATGTTATTGTTACAGCTCACGCATTTGTAATAATTTTCTTTATAGTAATACCAATTATAATTGGAGGATTCGGAAATTGATTAGTTCCATTGATATTGGGAGCACCAGATATAGCATTCCCTCGAATAAACAATATAAGATTTTGACTTTTACCACCTTCACTAACATTATTAATTATAAGAAGAATTGTAGAAAGTGGGGCTGGAACAGGTTGAACAGTCTACCCTCCTTTATCTTCTAATATTGCTCATGGCGGATCTTCCGTAGATTTAGCTATTTTTAGACTTCATTTAGCAGGTATTTCCTCAATTTTAGGAGCAGTAAATTTTATTACGACTGTAATTAATATACG----------------------------------------------------------------------------------------------------------------------------------------------------------------------------------------------
>PSFOR864-14|BC-PASSIFOR0082|Anastrangalia dubia|COI-5P
TACTTTATATTTTATTTTTGGAGCTTGGGCAAGAATAGTAGGAACATCCTTAAGACTCCTAATTCGTTCTGAATTAGGAAATCCCGGATCATTAATTGGTGATGACCAAATTTATAATGTTATTGTTACAGCTCACGCATTTGTAATAATTTTCTTTATAGTAATACCAATTATAATTGGAGGATTCGGAAATTGATTAGTTCCATTGATATTGGGAGCACCAGATATAGCATTCCCTCGAATAAACAATATAAGATTTTGACTTTTACCACCTTCACTAACATTATTAATTATAAGAAGAATTGTAGAAAGTGGGGCTGGAACAGGTTGAACAGTCTACCCTCCTTTATCTTCTAATATTGCTCATGGCGGATCTTCCGTAGATTTAGCTATTTTTAGACTTCATTTAGCAGGTATTTCCTCAATTTTAGGAGCAGTAAATTTTATTACGACTGTAATTAATATACGACCTGTTGGGATAAGACCTGAACGAATACCCCTATTTGTTTGAGCTGTTGTAATTACAGCAGTTCTTCTTCTTTTATCTCTACCAGTATTAGCTGGGGCAATTACTATACTTTTAACAGATCGAAATCTTAATACTTCTTTCTTTGACCCAGCAGGGGGTGGAGATCCAATTCTCTATCAACATTTATTT
>PSFOR101-13|BC-PNEF-PSFOR0073|Anastrangalia dubia|COI-5P
TACTTTATATTTTATTTTTGGAGCTTGGGCAAGAATAGTAGGAACATCCTTAAGACTCCTAATTCGTTCTGAATTAGGAAATCCCGGATCATTAATTGGTGATGACCAAATTTATAATGTTATTGTTACAGCTCACGCATTTGTAATAATTTTCTTTATAGTAATACCAATTATAATTGGAGGATTCGGAAATTGATTAGTTCCATTGATATTGGGAGCACCAGATATAGCATTCCCTCGAATAAACAATATAAGATTTTGACTTTTACCACCTTCACTAACATTATTAATTATAAGAAGAATTGTAGAAAGTGGGGCTGGAACAGGTTGAACAGTCTACCCTCCTTTATCTTCTAATATTGCTCATGGCGGATCTTCCGTAGATTTAGCTATTTTTAGACTTCATTTAGCAGGTATTTCCTCAATTTTAGGAGCAGTAAATTTTATTACGACTGTAATTAATATACGACCTGTTGGAATAAGACCTGAACGAATACCCCTATTTGTTTGAGCTGTTGTAATTACAGCAGTTCTTCTTCTTTTATCTCTACCAGTATTAGCTGGGGCAATTACTATACTTTTAACAGATCGAAATCTTAATACTTCTTTCTTTGACCCAGCAGGGGGTGGAGATCCAATTCTCTATCAACATTTATTT
>PSFOR810-13|BC-PNEF-PSFOR0687|Anastrangalia reyi|COI-5P
TACTTTATATTTTATTTTTGGAGCTTGGGGAAGAATAGTAGGAACATCCTTAAGACTCCTAATTCGTTCTGAATTAGGAAATCCTGGATCATTAATTGGTGATGACCAAATTTATAATGTTATTGTTACAGCTCACGCATTTGTAATAATTTTCTTTATAGTAATACCAATTATAATTGGAGGATTCGGAAATTGATTAGTTCCATTGATATTGGGAGCACCAGATATAGCATTCCCTCGAATAAACAATATAAGATTTTGACTTTTACCACCTTCACTAACATTATTAATTATAAGAAGAATTGTAGAAAGTGGGGCTGGAACAGGTTGAACAGTCTACCCTCCTTTATCTTCTAATATTGCTCATGGCGGATCTTCCGTAGATTTAGCTATTTTTAGACTTCATTTAGCAGGTATTTCCTCAATTTTAGGAGCAGTAAATTTTATTACGACTGTAATTAATATACGACCTGTTGGAATAAGACCTGAACGAATACCCCTATTTGTTTGAGCTGTTGTAATTACAGCAGTTCTTCTTCTTTTATCTCTACCAGTATTAGCTGGGGCAATTACTATACTTTTAACAGATCGAAATCTTAATACTTCTTTCTTTGACCCAGCAGGGGGTGGAGATCCAA--------------------
>PSFOR104-13|BC-PNEF-PSFOR0076|Anastrangalia sanguinolenta|COI-5P
AACTTTATATTTCATTTTTGGAGCTTGAGCGAGAATAGTAGGAACTTCATTAAGATTATTGATTCGTTCAGAATTAGGAAATCCAGGATCTTTGATTGGAAATGATCAAATTTATAATGTTATTGTAACAGCCCATGCATTTGTAATAATTTTCTTTATAGTAATACCTATTATAATTGGAGGCTTTGGAAATTGATTAGTTCCATTAATATTAGGAGCTCCAGATATAGCTTTCCCTCGAATAAATAATATAAGATTTTGATTATTACCACCTTCACTAACTTTATTAATTATAAGAAGAATTGTAGAAAGGGGGGCTGGAACAGGATGAACTGTATATCCTCCCCTATCTTCTAATATTGCTCATAGAGGTTCTTCTGTTGATTTAGCTATTTTTAGACTTCATTTAGCTGGAATTTCTTCAATTCTTGGAGCAGTTAATTTTATTACCACTGTTATTAATATACGACCTGCTGGTTTAAAACCTGAACAAATGCCCTTATTTGTCTGAGCTGTAGTAATTACCGCAGTTCTTCTCCTTTTATCTTTACCTGTCCTAGCTGGAGCAATTACTATACTTTTAACAGATCGGAATCTAAATACTTCATTTTTTGATCCTGCAGGTGGAGGAGATCCTATTTTATATCAACATTTATTT
>PSFOR036-13|BC-PNEF-PSFOR0008|Anisorus quercus|COI-5P
AACTTTATACTTTATTTTTGGAGCTTGAGCTGGAATAGTCGGAACTTCCCTAAGAATTTTAATTCGCTCAGAACTTGGAAATCCAGGAACTTTAATTGGAGATGATCAAATTTATAATGTTATTGTTACAGCTCATGCCTTTGTAATAATTTTTTTCATAGTAATACCTATTATAATTGGGGGTTTTGGAAACTGATTAGTTCCTCTAATACTAGGAGCCCCTGATATAGCATTCCCTCGAATAAATAATATAAGATTTTGACTTTTACCACCATCTTTAACATTACTTTTAATAAGAAGAATTGTTGAAAATGGAGCAGGAACAGGTTGAACTGTTTATCCCCCTCTCTCATCTAATATTGCTCACGGTGGATCTTCTGTTGATTTAGCAATTTTCAGACTTCACCTTGCTGGAATTTCCTCAATTTTAGGAGCTGTAAATTTTATTACAACAGTAATTAATATACGACCTTCAGGAATAACCTTAGATCGTTTACCTTTATTTGTTTGAGCTGTTGTAATTACTGCTATTTTATTATTATTATCTTTACCTGTACTTGCCGGAGCAATTACTATACTTTTAACTGATCGTAATATTAACACCTCATTTTTTGACCCTGCTGGTGGAGGAGACCCAATTTTATATCAACATTTATTT
>PSFOR297-13|BC-PNEF-PSFOR0269|Anisotoma humeralis|COI-5P
AACTTTATATTTTATTTTTGGGGCTTGATCTGGAATAGTTGGAACCTCACTTAGAATCTTAATTCGAGCTGAATTAGGAACTCCTGGGAGATTAATTGGAGATGATCAAATTTATAATGTTATTGTAACAGCACATGCTTTTGTAATAATTTTTTTTATAGTAATACCAATTATAATTGGGGGTTTCGGAAATTGATTAGTCCCATTAATATTAGGGGCTCCTGATATAGCTTTCCCTCGAATAAATAATATAAGATTTTGACTTTTACCTCCTTCTTTAACTTTACTACTTATGAGAAGAATAGTTGAAAATGGAGCTGGAACAGGATGAACTGTTTACCCTCCTTTATCAGCAAATATTTCCCATAGAGGTTCATCTGTTGATTTAGCAATTTTCAGTCTTCATTTAGCTGGTATTTCTTCAATTTTAGGTGCTGTAAATTTTATTACAACAGTAATTAATATACGAAGAATTGGAATAACTTTTGATAAAATACCATTATTTGTTTGATCTGTAGTAATTACTGCATTATTATTACTTTTATCTCTTCCTGTTTTAGCTGGAGCAATTACTATACTTTTAACTGATCGAAATTTAAATACATCTTTTTTTGATCCAGCTGGAGGAGGAGACCCTATTTTATACCAACATTTATTT
>PSFOR871-14|BC-PASSIFOR0089|Anisotoma humeralis|COI-5P
AACTTTATATTTTATTTTTGGGGCTTGATCTGGAATAGTTGGAACCTCACTTAGAATCTTAATTCGAGCTGAATTAGGAACTCCTGGGAGATTAATTGGAGATGATCAAATTTATAATGTTATTGTANCAGCACATGCTTTTGTAATAATTTTTTTTATAGTAATACCAATTATAATTGGGGGTTTCGGAAATTGATTAGTCCCATTAATATTAGGGGCTCCTGATATAGCTTTCCCTCGAATAAATAATATAAGATTTTGACTTTTNCCTCCTTCTTTAACTTTACTACTTATGAGAAGAATAGTTGAAAATGGAGCTGGAACAGGATGAACTGTTTNCCCTCCTTTATCAGCAAATATTTCCCATAGAGGTTCATCTATTGATTTAGCAATTTTCAGTCTTCATTTAGCTGGTATTTCTTCAATTTTAGGTGCTGTAAATTTTATTACAACAGTAATTAATATACGAAGAATTGGAATAACTTTTGATAAAATACCATTATTTGTTTGATCTGTAGTAATTACTGCATTATTATTACTTTTATCTCTTCCTGTTTTAGCTGGAGCAATTACTATACTTTTAACTGATCGAAATTTAAATACATCTTTTT-----------------------------------------------
>PSFOR694-13|BC-PNEF-PSFOR0571|Anobium hederae|COI-5P
-------------------------------------------ACTTCCCTAAGAATTCTAATTCGATCTGAGTTAGGAAACCCTGGTGCCCTAATTGGAGATGATCAAATTTATAACGTAATTGTTACGGCCCACGCTTTCGTTATAATTTTTTTTATAGTTATACCCATCATAATTGGAGGATTCGGAAATTGATTAGTTCCCCTTATATTAGGAGCCCCTGATATAGCATTCCCTCGAATAAATAACATAAGATTTTGATTATTGCCTCCATCTTTATCATTATTACTTATAAGAAGAATTGTTAATACAGGTGCAGGCACTGGATGAACAGTTTATCCCCCCCTATCATCCAATATTGCCCATAGAGGGGCATCAGTTGATTTAGCAATTTTTAGACTCCATTTAGCAGGAGCTTCTTCTATTCTTGGCGCCGTAAATTTTATTACTACAGTAATTAATATACGACCCACAGGAATATCTTTTGACTGTATACCTTTATTTGTATGATCAGTAGTAATTACAGCTCTCCTATTGCTTTTATCATTACCGGTTTTGGCTGGTGCTATTACAATATTACTAACAGATCGCAATTTAAATACATCATTCTTTGACCCTGCTGGGGGAGGAGATCCTATTTTATACCAACATTTATTT
>PSFOR695-13|BC-PNEF-PSFOR0572|Anobium inexspectatum|COI-5P
-----------------------------------------------------------------------------------------------------------------------------------------------------------------------------------------------------------------------------------------------------------TAAGATTTTGGTTACTACCGCCGTCTTTATCCCTACTATTAATAAGTAGAATTGTAAATACAGGGGCAGGCACAGGATGAACTGTTTATCCCCCCTTATCATCTAATATTGCCCACAGAGGGGCGTCAGTTGATTTAGCTATTTTCAGGCTTCATTTGGCGGGTGCTTCCTCAATTCTTGGTGCAGTAAATTTTATTACTACAGTAATTAACATGCGACCTATAGGAATATCTTTTGATCGTATGCCCTTATTTGTATGATCAGTAGCAATCACGGCTCTCTTGCTTCTTTTATCACTACCAGTTTTAGCCGGAGCCATTACAATGTTATTAACAGATCGTAATCTAAATACATCGTTCTTTGACCCTGCTGGTGGAGGAGACCCTATCTTGTATCAACATCTATTT
>PSFOR105-13|BC-PNEF-PSFOR0077|Anoplodera rufipes|COI-5P
AACTTTATACTTCCTATTTGGAGCTTGAGCTAGAATAGTAGGAACCTCGTTAAGACTATTAATTCGATCTGAATTAGGCAATCCCGGATCTTTAATTGGTGACGATCAAATTTATAATGTAATCGTTACAGCTCATGCTTTTATTATAATTTTTTTTATAGTAATACCTATTATAATTGGAGGATTTGGAAATTGATTAGTCCCTTTAATATTAGGGGCTCCTGACATAGCTTTCCCTCGAATAAATAATATAAGATTTTGGTTACTCCCACCTTCACTTACATTACTAATTATAAGAAGAGTGGTAGAAAGAGGTGCTGGAACAGGATGAACTGTTTACCCACCATTATCATCAAATATTGCTCATAGAGGATCTTCTGTTGATTTGGCAATTTTTAGATTACATTTGGCTGGAATTTCTTCAATTTTAGGCGCTGTTAATTTTATTACAACTGTTATTAATATACGACCTGCCGGAATAGATTTAGATTGTATACCTTTATTTGTCTGAGCTGTAGTGATTACAGCTATTTTATTACTTTTATCTTTACCTGTCTTAGCTGGAGCAATTACTATACTTTTAACAGATCGAAATCTTAATACTTCTTTTTTTGACCCCGCAGGAGGAGGAGATCCAATTTTATATCAACACTTATTT
>PSFOR430-13|BC-PNEF-PSFOR0402|Anoplodera sexguttata|COI-5P
-------------------------------------------------ATAAGACTTTTAATTCGATCAGAATTAGGTAATCCAGGATCTTTAATTGGAGATGATCAAATTTATAATGTAATTGTTACAGCTCACGCTTTTGTAATAATTTTCTTTATAGTAATACCTATTATAATTGGGGGATTCGGAAATTGATTAGTCCCTTTAATACTAGGTGCTCCAGATATAGCTTTCCCCCGAATAAATAATATAAGATTTTGATTACTTCCACCTTCGCTTACATTATTAATTATAAGAAGAGTAGTAGAAAGTGGAGCTGGAACAGGATGAACTGTATATCCCCCTTTATCATCAAATATTGCCCATAGAGGTTCTTCTGTAGACTTAGCTATTTTTAGATTACATTTAGCAGGAATTTCTTCAATTTTAGGAGCTGTAAATTTTATTACAACTGTTATTAATATACGACCTATAGGAATAAATTTAGATCGAATACCTTTATTTGTTTGAGCTGTAGTTGTTACAGCTATTTTATTACTTTTATCTTTACCTGTTTTAGCTGGAGCAATTACTATACTTTTAACAGATCGTAATCTTAATACCTCTTTTTTCGACCCCGCGGGAGGAGGAGATCCAATCTTATACCAACACTTATTT
>PSFOR580-13|BC-PNEF-PSFOR0457|Anthaxia umbellatarum|COI-5P
AACTTTATATTTTATCTTTGGTGCCTGATCTGGAATAGTCGGAACAGCCCTTAGATTATTAATTCGAGCAGAATTAGGTAATCCTGGTACACTTATTGGAAATGACCAAATTTATAACGTAATTGTTACAGCACACGCTTTTATTATAATTTTCTTTATAGTTATACCCATTATAATAGGAGGATTTGGAAACTGACTTGTCCCCTTAATATTAGGAGCACCAGATATAGCCTTTCCACGAATAAACAATATAAGATTTTGACTTCTACCACCATCATTAACCCTTCTTCTTATAAGAAGAGTAGTTGAAAGTGGAGCAGGAACAGGCTGAACAGTTTATCCTCCCCTTGCTAGAAATATTGCCCATAGAGGGGCATCTGTTGATTTAGCCATCTTTAGATTACACTTGGCAGGAATCTCATCAATTTTAGGAGCAATTAATTTTATTACAACTGTTATCAATATACGATCAGTAGGAATAACATTTGACCGAATACCTCTATTTGTTTGATCAGTAGCTATCACTGCAGTACTACTCCTCCTATCTTTACCAGTTTTAGCTGGAGCTATTACAATACTTTTAACAGATCGAAATTTAAATACTTCCTTCTTTGATCCTGCTGGAGGAGGAGATCCAATTTTATATCAACATCTATTT
>PSFOR177-13|BC-PNEF-PSFOR0149|Anthribus fasciatus|COI-5P
AACTTTATATTTTATCTTTGGAGCTTGAGCAGGAATAATAGGAACCTCGCTAAGAATTTTAATTCGTATAGAATTAGGAAACCCGGGTTCCTTAATTGGTGACGACCAAATTTACAATGTGATTGTCACAGCCCACGCTTTTGTAATAATTTTTTTTATAGTTATACCAACAATAATTGGAGGCTTTGGTAATTGACTAGTTCCCCTCATACTAGGCGCACCAGACATAGCTTTCCCGCGAATAAATAATATAAGATTTTGGCTTCTCCCCCCCTCATTAACTCTACTTATATTAAGAAGAATTGTAGAAAGAGGAGCTGGTACAGGTTGAACTGTTTACCCGCCGTTATCTTCCAATATTGCTCATGGAGGATCTTCTGTAGATTTAGCTATTTTCAGACTTCATCTAGCGGGGGTCTCATCAATTCTAGGAGCCGTAAACTTTATCACTACAATTATTAATATACGGCCTGAAGGGATAAGATTCGACCGAATACCTCTATTTGTTTGAGCTGTTGGAATTACTGCTCTTCTTCTTCTTCTGTCCCTGCCTGTTTTAGCAGGTGCTATTACTATATTATTAACAGATCGAAATTTAAACACTTCTTTCTTTGACCCTGCAGGAGGAGGTGACCCAATTTTATATCAACACTTATTT
>PSFOR106-13|BC-PNEF-PSFOR0078|Arhopalus ferus|COI-5P
AACATTATATTTTATTTTTGGGGCATGGGCAAGAATAGTTGGAACTTCTTTGAGTCTTTTAATTCGTTCAGAATTAGGTAGCCCTGGATCTTTAATTGGGGATGATCAAATTTATAATGTTATTGTTACAGCTCATGCTTTTGTTATAATTTTTTTTATAGTAATACCCATTATAATTGGGGGATTCGGAAATTGATTAGTTCCTTTAATACTTGGGGCACCTGATATAGCTTTTCCCCGAATAAATAATATAAGATTTTGACTTTTACCTCCTTCTTTAACTTTATTAATTATAAGAAGAATTGTTGAAAATGGGGCAGGGACTGGGTGAACTGTATACCCTCCTCTTTCTGCTAATATTGCTCATAGAGGAGCTTCTGTAGATTTAGCTATTTTTAGACTTCATTTAGCAGGAATTTCATCAATTTTAGGGGCTGTAAATTTTATCACAACAGTTATTAATATACGGCCAAACGGAATAACTTTAGATCGTATACCTTTATTTGTATGGGCAGTAATTATTACTGCAATTTTACTTCTTCTTTCTTTACCGGTATTAGCTGGTGCAATCACTATACTTTTAACGGACCGAAATTTAAATACTTCATTTTTTGATCCAGCAGGTGGAGGTGACCCAATTTTATACCAACATTTGTTT
>PSFOR107-13|BC-PNEF-PSFOR0079|Arhopalus rusticus|COI-5P
TACACTTTACTTTATTTTTGGGGCATGGGCCAGAATAGTCGGAACTTCATTAAGATTATTGATTCGATCTGAACTAGGGAGGCCGGGATCTTTAATTGGGGACGATCAAATTTATAATGTTATTGTTACTGCTCACGCTTTTGTAATAATTTTTTTTATGGTTATACCAATTATAATTGGAGGCTTCGGAAATTGATTAGTGCCGTTAATACTGGGAGCCCCAGATATGGCTTTCCCTCGAATAAATAATATAAGATTTTGGCTTTTACCCCCCTCATTGACTTTACTTATTATAAGAAGAATTGTTGAAAGCGGGGCAGGAACAGGATGAACTGTTTACCCACCACTATCCTCTAATATTGCTCATAGAGGGGCTTCTGTAGATTTAGCAATTTTTAGTTTACATTTAGCAGGAATTTCATCTATTTTAGGGGCCGTAAATTTTATTACTACAGTAATTAATATACGTCCTAGAGGAATAACACTAGACCGAATACCCCTTTTTGTATGGGCAGTTGTTATTACAGCAATTTTACTTTTACTTTCTCTGCCGGTACTGGCAGGAGCAATCACAATATTATTAACAGATCGAAATTTAAATACTTCATTTTTTGATCCTTCAGGAGGAGGAGACCCCATCCTCTATCAACATCTATTT
>PSFOR108-13|BC-PNEF-PSFOR0080|Arhopalus syriacus|COI-5P
TACACTTTACTTTATTTTTGGGGCATGGGCTAGAATAGTCGGAACTTCATTAAGATTATTGATTCGATCTGAACTAGGGAGGCCGGGATCTTTAATTGGGGATGATCAAATTTATAATGTTATTGTTACTGCTCACGCTTTTGTAATAATTTTTTTTATAGTTATACCAATTATAATTGGAGGCTTCGGAAATTGATTAGTGCCGTTAATACTGGGAGCCCCAGATATGGCTTTCCCTCGAATAAACAATATAAGATTTTGGCTTTTACCCCCCTCATTGACTTTACTTATTATAAGAAGAATTGTTGAAAGCGGGGCAGGAACAGGATGAACTGTTTACCCACCATTATCCTCTAATATTGCTCATAGGGGGGCTTCTGTAGATTTAGCAATTTTTAGTTTACATTTAGCAGGAATTTCATCTATTTTAGGAGCTGTAAATTTTATTACTACAGTAATTAATATACGTCCTAGGGGAATAACGCTAGACCGAATACCCCTTTTTGTATGAGCAGTTGTTATCACAGCAATTTTACTTTTACTTTCTCTGCCGGTACTGGCAGGAGCAATCACAATATTATTAACAGATCGAAATTTAAATACTTCATTTTTTGATCCTTCAGGAGGAGGAGATCCCATCCTCTATCAACATCTATTT
>PSFOR040-13|BC-PNEF-PSFOR0012|Asemum striatum|COI-5P
AACTTTATACTTTATTTTTGGTGCTTGATCAGGAATAGTTGGAACATCGTTAAGAATACTAATTCGTTCAGAATTAGGAAATCCTGGATCTTTAATTGGTGATGATCAAATTTATAATGTTATTGTCACAGCTCATGCTTTTATTATAATTTTCTTTATAGTTATGCCTATTATAATTGGAGGATTTGGAAATTGATTAGTTCCTTTAATATTAGGGGCTCCTGATATGGCTTTTCCACGAATAAATAATATAAGATTTTGACTTTTACCCCCCTCATTAACACTTTTAATTATAAGAAGAATTGTTGAAAACGGTGCAGGTACTGGATGAACAGTTTACCCCCCATTATCAGCAAATATTGCTCACAGAGGATCATCTGTAGATTTAGCTATTTTCAGGCTTCATCTAGCTGGAATTTCTTCTATTTTAGGAGCAGTTAATTTTATCACAACTGTAATTAATATGCGTCCTAAAGGAATAATATTAGATCGAATACCTTTATTTGTTTGAGCTGTTGTTATTACAGCAATTCTTTTACTTTTATCTTTACCCGTATTAGCGGGGGCTATCACTATACTTTTAACTGATCGAAATTTAAATACTTCATTTTTTGACCCAATCGGAGGAGGGGATCCAATTTTATATCAACATTTATTT
>PSFOR041-13|BC-PNEF-PSFOR0013|Asemum striatum|COI-5P
AACTTTATACTTTATTTTTGGTGCTTGATCAGGAATAGTTGGAACATCGTTAAGAATACTAATTCGTTCAGAATTAGGAAATCCTGGATCTTTAATTGGTGATGATCAAATTTATAATGTTATTGTCACAGCTCATGCTTTTATTATAATTTTCTTTATAGTTATGCCTATTATAATTGGAGGATTTGGAAATTGATTAGTTCCTTTAATATTAGGGGCTCCTGATATGGCTTTTCCACGAATAAATAATATAAGATTTTGACTTTTACCCCCCTCATTAACACTTTTAATTATAAGAAGAATTGTTGAAAACGGTGCAGGTACTGGATGAACAGTTTACCCCCCATTATCAGCAAATATTGCTCACAGAGGATCATCTGTAGATTTAGCTATTTTCAGGCTTCATCTAGCTGGAATTTCTTCTATTTTAGGAGCAGTTAATTTTATCACAACTGTAATTAATATGCGTCCTAAAGGAATAATATTAGATCGAATACCTTTATTTGTTTGAGCTGTTGTTATTACAGCAATTCTTTTACTTTTATCTTTACCCGTATTAGCAGGGGCTATCACTATACTTTTAACTGATCGAAATTTAAATACTTCATTTTTTGACCCAATCGGAGGAGGGGATCCAATTTTATATCAACATTTATTT
>PSFOR1058-14|PASSIFOR-NM13-078|Athous haemorrhoidalis|COI-5P
AACCCTTTACTTCCTTTTTGGAGCCTGAGCAGGAATGCTTGGAACTTCATTAAGACTACTAATCCGAGCAGAACTAGGAAACCCTGGATCTCTAATTGGAAATGATCAAATTTACAATGTTATTGTCACAGCTCATGCTTTCATTATAATTTTCTTTATAGTAATGCCTATTATAATCGGAGGATTCGGAAACTGACTAGTCCCCCTTATACTAGGAGCACCAGATATAGCCTTCCCTCGAATAAACAACATAAGATTCTGGTTCTTACCACCATCACTATCACTTCTTCTAATAAGAAGAATCGTAGAAAACGGAGCAGGAACTGGATGAACCGTCTACCCACCCTTATCAGCCAATATTGCCCATAGAGGATCATCTGTCGATCTAGCTATTTTCAGACTACATTTAGCTGGAATTTCATCAATTCTTGGAGCAGTAAACTTCATTTCAACAGTAATTAATATACGATCAACCGGAATTACATTCGACCGAATACCATTATTTGTATGAGCAGTAGTAATCACTGCACTCCTCCTACTCCTATCTCTACCCGTCCTAGCAGGTGCTATCACAATATTATTAACGGATCGAAATCTAAATACATCATTCTTCGACCCAGCAGGTGGAGGTGACCCAATCCTTTACCAACACTTATTC
>PSFOR1054-14|PASSIFOR-NM13-074|Athous vittatus|COI-5P
AACACTTTATTTCCTTTTTGGAGCCTGAGCAGGAATGCTTGGAACTTCATTAAGACTATTAATCCGAGCAGAACTAGGTAACCCTGGATCTCTAATTGGAAATGATCAAATCTACAATGTTATTGTAACAGCCCACGCTTTCATTATAATTTTCTTCATAGTTATGCCTATCATAATTGGAGGATTCGGAAACTGATTAGTACCTCTTATACTAGGAGCTCCAGACATAGCATTCCCCCGAATAAACAATATAAGATTCTGATTCTTACCTCCATCTCTTTCCCTTCTACTAATAAGAAGAATTGTAGAAAATGGGGTAGGAACCGGATGAACCGTCTATCCACCTTTATCAGCCAATATTGCCCACAGAGGATCATCCGTTGACTTAGCAATCTTCAGCCTACACCTGGCTGGAATCTCATCAATCCTTGGTGCAGTAAATTTTATCTCAACCGTAATCAATATACGATCAACCGGAATTACATTTGACCGAATACCTCTATTTGTATGGGCAGTAGTAATCACCGCACTACTACTTCTGCTATCATTACCTGTACTAGCAGGAGCAATTACAATACTACTAACAGACCGAAACCTAAATACATCATTCTTTGACCCAGCTGGAGGAGGAGACCCTATTCTTTACCAACACCTATTC
>PSFOR978-14|BC-PSFOR-JD0132|Athous vittatus|COI-5P
---------------------------------------------TTCATTAAGACTATTAATCCGAGCAGAACTAGGTAACCCTGGATCTCTAATTGGAAATGATCAAATCTACAATGTTATTGTAACAGCCCACGCTTTCATTATAATTTTCTTCATAGTTATGCCTATCATAATTGGAGGATTCGGAAACTGATTAGTACCTCTTATACTAGGAGCTCCAGACATAGCATTCCCCCGAATAAACAATATAAGATTCTGATTCTTACCTCCATCTCTTTCCCTTCTACTAATAAGAAGAATTGTAGAAAATGGGGCAGGAACCGGATGAACCGTCTATCCACCTTTATCAGCCAATATTGCCCACAGAGGATCATCCGTTGACTTAGCAATCTTCAGCCTACACCTGGCTGGAATCTCATCAATCCTTGGTGCAGTAAATTTTATCTCAACCGTAATCAATATACGATCAACCGGAATTACATTTGACCGAATACCTCTATTTGTATGGGCAGTAGTAATCACCGCACTACTACTTCTGCTATCATTACCTGTACTAGCAGGAGCAATTACAATACTACTAACAGACCGAAACCTAAATACATCATTCTTTGACCCAGCTGGAGGAGGAGACCCTATTCTTTACCAACACCTATTC
>PSFOR767-13|BC-PNEF-PSFOR0644|Athous vittatus|COI-5P
-----------------------------------------------------------------------------------------------------------------------------------------------------------------------------------------------------------------------------------------------------------TAAGATTCTGATTCTTACCTCCATCTCTTTCCCTTCTACTAATAAGAAGAATTGTAGAAAATGGGGCAGGAACCGGATGAACCGTCTATCCACCTTTATCAGCCAATATTGCCCACAGAGGGTCATCCGTTGACTTAGCAATCTTCAGCCTACACCTGGCTGGAATCTCATCAATCCTTGGTGCAGTAAATTTTATCTCAACCGTAATCAATATACGATCAACCGGAATTACATTTGACCGAATACCTCTATTTGTATGGGCAGTAGTAATCACCGCACTACTACTTCTTCTATCATTACCTGTACTAGCAGGAGCAATTACAATACTACTAACAGACCGAAACCTAAATACATCATTCTTTGNCCCAGCTGGAGGAGGAGA-------------------------
>PSFOR638-13|BC-PNEF-PSFOR0515|Benibotarus alternatus|COI-5P
AACATTATACTTCATTCTTGGAACATGAGCAGGTATATTGGGAACCTCATTAAGACTACTAATTCGAGCAGAATTAGGAACCCCTGGTACACTAATTGGGAATGACCAAATTTATAATGTTATTGTTACTGCTCATGCATTCATCATAATTTTCTTCATAGTAATGCCAATAATAATTGGAGGATTTGGAAATTGACTAGTACCACTGATATTAGGAGCCCCAGATATAGCATTTCCACGAATAAATAATATAAGATTTTGACTTCTACCCCCCTCACTATCTTTATTAATCTCTAGAAGACTAGTAGAAACGGGATCAGGCACAGGATGAACTGTATACCCCCCACTATCATCTAATATCGCCCATAGAGGAGCCTCAGTTGATTTAGCAATCTTTAGCCTTCATTTAGCAGGAATCTCCTCTATTCTAGGTGCTGTAAACTTTATCTCAACGATTATTAACATAAAATCAGCAAGAATAACATATGAACAAATACCCTTATTTGTATGAGCTGTAGGAATCACTGCCCTACTATTACTTCTATCTTTACCTGTATTAGCAGGTGCTATTACAATATTATTAACCGACCGTAATCTAAATACATCATTTTTTGATCCCACGGGAGGTGGAGATCCAATTCTATATCAGCATTTATTT
>PSFOR607-13|BC-PNEF-PSFOR0484|Biphyllus lunatus|COI-5P
AACTCTTTATTTTATCTTTGGAGCTTGATCAGGAATAGTGGGAACATCTCTTAGACTTTTAATTCGTTCCGAACTTGGAAATCCTGGGTCTTTAATTGGAGATGATCAAATTTACAATGTTATTGTAACAGCTCATGCCTTTATTATAATTTTTTTTATAGTTATACCTATTATAATAGGAGGGTTTGGAAATTGATTAGTACCATTAATATTAGGAGCCCCTGATATAGCATTTCCTCGAATAAATAACATAAGATTTTGACTTTTACCACCTTCTTTAACTTTATTAATTATAAGAAGAATTGTAGAAAGAGGAGCAGGGACAGGATGAACTGTTTATCCCCCTCTATCATCAAATATTGCCCATAGAGGATCATCAGTAGATTTAGCTATTTTTAGTCTTCATTTAGCAGGAATTTCCTCTATTCTAGGTGCAGTAAATTTCATTACAACAGTAATTAATATACGACCTATAGGAATAACTCTTGATCGAATACCTCTATTTGTGTGAGCAGTAACTATCACAGCTATTTTATTATTACTATCTCTCCCTGTTTTAGCAGGAGCTATTACAATATTACTTACAGATCGTAATTTAAATACATCATTTTTTGATCCTGCAGGAGGAGGAGACCCTATTTTATATCAACATTTATTT
>PSFOR1007-14|PASSIFOR-NM13-027|Biphyllus lunatus|COI-5P
AACTCTTTATTTTATCTTTGGAGCTTGATCAGGAATAGTAGGAACATCTCTTAGACTTTTAATTCGTTCCGAACTTGGAAATCCTGGATCTTTAATTGGAGATGATCAAATTTACAATGTTATTGTAACAGCTCATGCCTTTATTATAATTTTTTTTATAGTTATACCTATTATAATAGGAGGGTTTGGAAATTGATTAGTACCATTAATATTGGGAGCCCCTGATATAGCATTTCCTCGAATAAATAACATAAGATTTTGACTTTTACCACCTTCTTTAACTTTATTAATTATAAGAAGAATTGTAGAAAGAGGGGCAGGGACAGGATGAACTGTTTATCCCCCTCTATCATCAAATATTGCCCATAGAGGATCATCAGTAGATTTAGCTATTTTTAGTCTTCATTTAGCAGGAATTTCCTCTATTTTAGGTGCAGTAAATTTCATTACAACAGTAATTAATATACGACCAATAGGAATAACTCTTGATCGAATACCTTTATTTGTATGAGCTGTAACTATTACAGCTATTTTATTATTATTATCTCTCCCTGTTTTAGCAGGAGCTATTACAATATTACTTACAGATCGTAATTTAAATACATCATTTTTTGATCCTGCAGGAGGAGGAGACCCTATTTTATACCAACATTTATTT
>PSFOR1033-14|PASSIFOR-NM13-053|Bolitophagus reticulatus|COI-5P
AACCCTATATTTCATTTTCGGAGCATGAGCTGGAATAGTAGGAACTTCCTTAAGATTACTAATCCGAACAGAGCTTGGAAATCCTGGATCACTTATTGGAGATGACCAAATTTATAATGTTATTGTTACTGCACACGCATTTGTAATAATTTTCTTTATAGTTATACCTATTATAATCGGCGGATTTGGTAATTGACTAGTTCCATTAATACTAGGAGCACCAGATATAGCATTCCCTCGAATAAATAATATAAGATTTTGATTATTACCTCCCTCTTTAACACTTCTCCTAATGAGAAGAATTGTTGAAAATGGTGCAGGAACTGGTTGAACAGTATATCCTCCCCTTTCAGCAAATATTGCTCATAGAGGAGCATCAGTTGATCTCGCAATTTTTAGTCTACATCTTGCAGGTATTTCATCAATTTTAGGTGCAGTAAATTTCATTACAACAGTAATTAATATACGACCTCAAGGCATAACTCTTGACCGTATACCTTTATTTGTTTGAGCTGTAGTAATTACAGCATTATTACTTCTATTATCCTTACCCGTTCTTGCAGGTGCAATTACAATGCTCCTTACCGACCGAAATATTAATACATCTTTCTTTGATCCTGCTGGTGGGGGAGATCCTATTTTATACCAACATTTATTT
>PSFOR191-13|BC-PNEF-PSFOR0163|Bolitophagus reticulatus|COI-5P
AACCCTATATTTCATTTTCGGAGCATGAGCTGGAATAGTAGGAACTTCCTTAAGATTACTAATCCGAACAGAGCTTGGAAATCCTGGATCACTTATTGGAGATGACCAAATTTATAATGTTATTGTTACTGCACACGCATTTGTAATAATTTTCTTTATAGTTATACCTATTATAATCGGCGGATTTGGTAATTGACTAGTTCCATTAATACTAGGAGCACCAGATATAGCATTCCCTCGAATAAATAATATAAGATTTTGATTATTACCTCCCTCTTTAACACTTCTCCTAATGAGAAGAATTGTTGAAAATGGTGCAGGAACTGGTTGAACAGTATATCCTCCCCTTTCAGCAAATATTGCTCATAGAGGAGCATCAGTTGATCTCGCAATTTTTAGTCTACATCTTGCAGGTATTTCATCAATTTTAGGTGCAGTAAATTTCATTACAACAGTAATTAATATACGACCTCAAGGCATAACTCTTGACCGTATACCTTTATTTGTTTGAGCTGTAGTAATTACAGCATTATTACTTCTATTATCCTTACCCGTTCTTGCAGGTGCAATTACAATGCTCCTTACCGACCGAAATATTAATACATCTTTCTTTGATCCTGCTGGTGGGGGGAGTCCTTATTTTTACCCACATTTATTT
>PSFOR740-13|BC-PNEF-PSFOR0617|Brachygonus campadelli|COI-5P
AACCCTTTACTTCATCTTCGGTGCATGAGCAGGAATACTAGGCACCTCCTTAAGACTTTTAATTCGTGCTGAATTAGGAAACCCCGGATCCCTAATCGGCAATGACCAAATTTACAATGTTATCGTAACTGCACACGCATTCATCATAATTTTCTTTATAGTTATACCAATTATAATCGGAGGATTTGGAAATTGATTAGTTCCATTAATGTTAGGAGCCCCAGACATAGCCTTCCCCCGAATAAACAATATAAGATTTTGATTACTACCCCCGTCCTTAAGACTTCTCCTGATAAGAAGAATTGTAGAAAACGGAGCAGGAACAGGATGAACCGTGTACCCACCCCTATCATCAAACATTGCTCACAGAGGTTCCTCAGTTGATCTAGCAATCTTCAGTCTTCACCTAGCCGGAATCTCATCAATTCTGGGAGCCGTAAACTTCATCTCAACAGTAATCAATATACGATCAACAGGAATCTCATTTGATCGCATACCCCTCTTCGTATGAGCAGTAGCAATCACAGCTCTACTCCTCCTCCTTTCACTTCCAGTACTTGCAGGAGCAATCACCATACTTCTAACAGACCGAAATCTAAACACTTCATTCTTTGACCCTGCAGGAGGAGGAGACCCAATCCTTTACCAACACTTGTTC
>PSFOR741-13|BC-PNEF-PSFOR0618|Brachygonus megerlei|COI-5P
AACTCTTTACTTCATCTTCGGTGCATGGGCAGGAATACTAGGCACCTCCTTAAGACTTCTAATCCGTGCTGAATTGGGAAACCCCGGATCCTTAATCGGCAATGATCAAATCTACAACGTTATTGTTACTGCACATGCATTCATTATAATTTTCTTCATAGTTATACCAATCATAATTGGAGGATTCGGAAATTGGCTAGTCCCACTAATGTTGGGAGCCCCAGACATAGCCTTCCCCCGAATAAACAATATAAGATTTTGGTTACTCCCACCTTCACTTAGACTCCTCCTAATAAGAAGAATTGTAGAAAACGGAGCAGGAACAGGATGAACTGTCTACCCACCCCTCTCATCCAACATTGCNCACAGAGGTTCTTCAGTTGATCTAGCAATTTTCAGCCTTCATCTAGCCGGAATCTCATCAATCCTAGGAGCCGTAAACTTTATCTCAACAGTAATCAATATACGATCAACAGGAATCACGTTTGATCGGATACCTCTATTTGTATGAGCAGTAGCAATCACAGCCCTCCTTCTCCTCCTTTCACTACCAGTACTAGCAGGAGCAATTACTATACTTCTAACAGACCGAAACCTAAACACTTCATTCTTTGACCCTGCCGGAGGAGGAGACCCTATCCTTTACCAACACTTGTTC
>PSFOR814-13|BC-PNEF-PSFOR0691|Brachygonus ruficeps|COI-5P
AACACTATACTTCATCTTTGGTGCATGGGCAGGTATACTAGGCACATCCTTAAGCCTTCTAATTCGAGCCGAATTAGGTAACCCAGGATCCTTAATTGGAAACGACCAAATCTATAATGTTATTGTAACAGCACATGCATTTATCATGATTTTCTTCATAGTAATACCAATCATAATTGGAGGATTCGGAAACTGATTAGTTCCCCTTATACTAGGAGCACCTGATATAGCATTCCCACGAATAAACAACATAAGATTCTGATTACTACCCCCATCCTTAAGCCTTCTACTAATAAGAAGAATTGTAGAAAACGGAGCAGGAACAGGATGAACAGTCTACCCACCCCTCTCATCCAATATCGCCCACAGAGGATCATCAGTTGATTTAGCAATTTTCAGGCTTCATCTTGCAGGTATCTCATCAATTCTAGGTGCAGTAAATTTTATTTCAACAGTAATCAATATACGATCCCCTGGAATCTCATTTGATCGTATACCCTTATTTGTTTGAGCAGTAGCTATCACAGCTCTTCTTCTACTACTTTCACTCCCAGTACTAGCAGGAGCAATCACAATACTTTTAACAGACCGTAACCTAAATACCTCATTCTTTGACCCAGCAGGAGGGGGAGACCCAATCCTCTACCAACACCTATTC
>PSFOR971-14|BC-PSFOR-JD0125|Brachygonus ruficeps|COI-5P
----------------TTTGGTGCATGGGCAGGTATACTAGGCACATCCTTAAGCCTTCTAATTCGAGCCGAATTAGGTAACCCAGGATCCTTAATTGGAAACGACCAAATCTATAATGTTATTGTAACAGCACATGCATTTATCATGATTTTCTTCATAGTAATACCAATCATAATTGGAGGATTCGGAAACTGATTAGTTCCCCTTATACTAGGAGCACCTGATATAGCATTCCCACGAATAAACAACATAAGATTCTGATTACTACCCCCATCCTTAAGCCTTCTACTAATAAGAAGAATTGTAGAAAACGGAGCAGGAACAGGATGAACAGTCTACCCACCCCTNTCATCCAATATCGCCCACAGAGGATCATCAGTTGATTTAGCAATTTTCAGGCTTCATCTTGCAGGTATNTCATCAATTCTAGGTGCAGTAAATTTTATTTCAACAGTAATCAATATACGATCCCCTGGAATCTCATTTGATCGTATACCCTTATTTGTTTGAGCAGTAGCTATCACAGCTCTTCTTCTACTACTTTC----------------------------------------------------------------------------------------------------------------
>PSFOR582-13|BC-PNEF-PSFOR0459|Buprestis octoguttata|COI-5P
TACATTATACTTTATTTTTGGAGCCTGATCAGGAATAGTAGGAACAGCCTTAAGACTTTTAATCCGAGCAGAACTCGGGAATCCTGGTGCACTCATTGGAGATGACCAAGTATACAATGTAATTGTAACTGCCCACGCATTTGTAATAATTTTTTTTATAGTTATACCCATTATAATAGGTGGATTCGGAAACTGATTAGTACCCTTAATATTAGGGGCACCTGATATAGCTTTTCCACGTATAAATAATATAAGATTTTGACTTCTACCCCCTTCACTAACCCTTTTATTAATAAGTAGGGTAGTAGAGAATGGAGCAGGAACAGGATGAACTGTTTATCCCCCTCTTGCAGCAAACATTGCTCATAGAGGAGCCTCTGTTGATTTAGCTATTTTTAGTCTTCATTTAGCAGGTGTTTCATCAATTCTAGGGGCTGTAAATTTCATTACTACAGTTATTAATATACGATCCACAGGAATAACATTTGACCGAATACCTTTATTTGTATGATCAGTAGCAATTACTGCTTTATTATTACTTCTTTCATTACCTGTTCTGGCAGGAGCAATTACAATACTTCTTACAGATCGAAATTTCAATACATCATTCTTTGACCCTGCAGGGGGAGGAGATCCTATTCTTTATCAACATTTATTT
>PSFOR583-13|BC-PNEF-PSFOR0460|Buprestis rustica|COI-5P
TACATTATACTTCATTTTTGGGGCTTGATCAGGAATGGTAGGAACTGCTTTAAGTCTTTTAATTCGAGCTGAATTAGGAAACCCGGGTGCACTAATTGGGGATGACCAAGTTTACAACGTAATTGTTACTGCTCACGCATTTGTTATAATTTTCTTCATAGTAATACCTGTAATAATAGGGGGTTTTGGTAATTGATTAGTACCATTAATATTAGGAGCACCTGATATAGCCTTCCCTCGTATAAACAATATAAGATTTTGACTTCTCCCTCCTTCCTTAACTCTTCTTTTAATAAGAAGAGTAGTAGAAAATGGGGCCGGGACAGGATGAACTGTATATCCTCCTCTTGCAGCAAATATTGCTCATAGAGGGGCTTCTGTTGATTTAGCCATTTTTAGTCTGCATTTAGCAGGTGTTTCATCAATTTTAGGAGCTGTCAACTTTATTACTACAGTAATCAATATACGATCAGTAGGGATAACATTTGATCGTATACCATTATTTGTATGATCAGTAGCAATTACTGCTCTACTATTACTCTTGTCATTACCAGTTTTAGCAGGAGCTATTACAATACTTCTCACAGACCGAAATTTTAATACATCTTTCTTTGATCCTGCTGGGGGAGGAGACCCAATCCTTTATCAACACTTATTT
>PSFOR999-14|PASSIFOR-NM13-019|Calambus bipustulatus|COI-5P
AACTCTATACTTCCTATTCGGAGCATGAGCAGGAATGCTAGGAACTTCACTAAGCCTTCTAATTCGAGCTGAACTAGGAAACCCTGGATCTTTAATTGGAAATGATCAAATTTATAACGTAATTGTTACAGCACATGCCTTTATTATAATTTTCTTCATAGTAATACCAATTATAATTGGAGGATTCGGAAACTGATTAATTCCCCTAATACTTGGTGCTCCCGATATAGCATTCCCACGAATAAATAACATAAGATTCTGATTTTTACCTCCTTCACTAAGCCTTCTTTTAATAAGAAGAATTGTTGAAAACGGTGCAGGAACAGGATGAACAGTGTACCCCCCACTTTCAGCCAACATTGCCCACAGAGGATCATCAGTTGATCTCGCAATTTTCAGTTTACATCTAGCTGGGATCTCCTCTATTCTAGGAGCCGTAAATTTTATTTCAACCGTCATCAATATACGAACAACTGGAATTACTTTTGACCGAATACCCCTATTCGTCTGAGCAGTAGTAATTACAGCCCTCCTTCTACTATTATCACTACCAGTATTAGCAGGAGCAATCACTATACTATTAACTGATCGAAACTTAAATACCTCCTTCTTTGACCCTGCAGGAGGTGGAGACCCAATTCTTTATCAACATCTATTC
>PSFOR465-13|BC-PASSIFOR0038|Calambus bipustulatus|COI-5P
------------------------------------------AACTTCACTAAGCCTTCTAATTCGAGCTGAACTAGGAAACCCTGGATCTTTAATTGGAAATGATCAAATTTATAACGTAATTGTTACAGCACATGCCTTTATTATAATTTTCTTCATAGTAATACCAATTATAATTGGAGGATTCGGAAACTGATTAATTCCCCTAATACTTGGTGCTCCCGATATAGCATTCCCACGAATAAATAACATAAGATTCTGATTTTTACCTCCTTCACTAAGCCTTCTTTTAATAAGAAGAATTGTTGAAAACGGTGCAGGAACAGGATGAACAGTGTACCCCCCACTTTCAGCCAACATTGCCCACAGAGGATCATCAGTTGATCTCGCAATTTTCAGTTTACATCTAGCTGGGATCTCCTCTATTCTAGGAGCCGTAAATTTTATTTCAACCGTCATCAATATACGAACAACTGGAATTACTTTTGACCGAATACCCCTATTCGTCTGAGCAGTAGTAATTACAGCCCTCCTTCTACTATTATCACTACCAGTATTAGCAGGAGCAATCACTATACTATTAACTGATCGAAACTTAAATACCTCCTTCTTTGACCCTGCAGGAGGTGGAGACCCAATTCTTTATCAACATCTATTC
>PSFOR559-13|BC-PNEF-PSFOR0436|Calitys scabra|COI-5P
AACCTTATACTTCATTTTTGGGGCTTGATCAGGAATAGTAGGAACTTCTTTAAGTTTACTGGTTCGATCAGAATTAGGAAACCCCGGCTCACTAATTGGAAATGACCAAATTTATAACGTAATTGTTACGGCTCATGCCTTTATCATAATTTTCTTTATAGTTATACCAATCATAATTGGGGGATTTGGAAACTGATTAGTTCCTTTGATACTTGGAGCACCTGATATAGCTTTTCCCCGAATAAACAATATAAGATTTTGACTTTTACCCCCGTCTCTAACACTACTTTTACTAAGAAGCATTGTAGAAAAAGGGGCTGGAACTGGATGAACAGTTTATCCTCCTCTATCCTCTAATATTGCCCATAGAGGATCCTCAGTAGATTTAGCCATTTTTAGCCTTCATTTAGCGGGAATCTCCTCTATTCTAGGGGCAGTAAATTTTATTACTACTGTAATTAACATACGTCCTAAGGGCATATCATTTGATCGAATTCCCCTATTTGTTTGATCTGTTTCTATTACAGCCCTTTTACTTTTACTTTCCCTTCCTGTTTTAGCTGGTGCAATTACTATACTTTTAACGGACCGAAATTTAAATACCTCCTTTTTTGATCCTACAGGAGGAGGTGACCCAATTCTTTACCAACATCTTTTT
>PSFOR042-13|BC-PNEF-PSFOR0014|Callidium aeneum|COI-5P
AACTTTATATTTTATTTTTGGTGCATGGGCTAGAATAGTAGGAACATCCTTAAGAATACTAATTCGAACTGAACTAGGAAACCCCGGATCTCTAATTGGAGATGACCAAATTTATAACGTTATTGTCACAGCCCACGCTTTCATTATAATTTTTTTTATGGTTATACCTATTATAATTGGGGGATTCGGAAACTGACTAGTTCCTTTAATACTTGGAGCACCTGATATAGCTTTTCCTCGAATAAATAATTTAAGATTTTGGTTACTGCCCCCTTCATTAACTCTTTTAATTTTAAGAAGAATTGTAGAAAATGGAGCTGGAACAGGATGAACTGTTTACCCCCCTCTTTCAGCCAACATTGCTCATGGAGGATCTTCTGTAGATTTGGCAATTTTTAGCCTTCACCTGGCGGGAATTTCTTCAATTTTAGGGGCAGTAAATTTTATTTCTACAATTATTAATATACGACCAATAGGAATAACTCTAGAACGAATACCCCTATTTGTTTGAGCAGTAGTAATTACTGCTATTTTACTTCTTCTTTCATTACCAGTCCTAGCTGGAGCTATTACCATATTATTAACTGACCGAAATATTAATACATCCTTCTTTGATCCTGCAGGAGGAGGAGACCCAATTCTATACCAGCACTTATTC
>PSFOR901-14|BC-PASSIFOR0120|Callidium aeneum|COI-5P
AACTTTATATTTTATTTTTGGTGCATGGGCTAGAATAGTAGGAACATCCTTAAGAATACTAATTCGAACTGAACTAGGAAACCCCGGATCTCTAATTGGAGATGACCAAATTTATAACGTTATTGTCACAGCCCACGCTTTCATTATAATTTTTTTTATGGTTATACCTATTATAATTGGGGGATTCGGAAACTGACTAGTTCCTTTAATACTTGGAGCACCTGATATAGCTTTTCCTCGAATAAATAATTTAAGATTTTGGTTACTACCCCCTTCATTAACTCTTTTAATTTTAAGAAGAATTGTAGAAAATGGAGCTGGAACAGGATGAACTGTTTACCCCCCTCTTTCAGCCAACATTGCTCATGGAGGATCTTCTGTAGATTTGGCAATTTTTAGCCTTCACCTGGCGGGAATTTCTTCAATTTTAGGGGCAGTAAATTTTATTTCTACAATTATTAATATACGACCAATAGGAATAACTCTAGAACGAATACCCCTATTTGTTTGAGCAGTAGTAATTACTGCTATTTTACTTCTTCTTTCATTACCAGTCCTAGCTGGAGCTATTACCATATTATTAACTGACCGAAATATTAATACATCCTTCTTTGACCCTGCAGGAGGAGGAGACCCAATTTTATACCAGCACTTATTC
>PSFOR429-13|BC-PNEF-PSFOR0401|Callidium aeneum|COI-5P
--------------------------GGGCTAGAATAGTAGGAACATCCTTAAGAATACTAATTCGAACTGAACTAGGAAACCCCGGATCTCTAATTGGAGATGACCAAATTTATAACGTTATTGTCACAGCCCACGCTTTCATTATAATTTTTTTTATGGTTATACCTATTATAATTGGGGGATTCGGAAACTGACTAGTTCCTTTAATACTTGGAGCACCTGATATAGCTTTTCCTCGAATAAATAATTTAAGATTTTGGTTACTACCCCCTTCATTAACTCTTTTAATTTTAAGAAGAATTGTAGAAAATGGAGCTGGAACAGGATGAACTGTTTACCCCCCTCTTTCAGCCAACATTGCTCATGGAGGATCTTCTGTAGATTTGGCAATTTTTAGCCTTCACCTGGCGGGAATTTCTTCAATTTTAGGGGCAGTAAATTTTATTTCTACAATTATTAATATACGACCAATAGGAATAACTCTAGAACGAATACCCCTATTTGTTTGAGCAGTAGTAATTACTGCTATTTTACTTCTTCTTTCATTACCAGTCCTAGCTGGAGCTATTACCATATTATTAACTGACCGAAATATTAATACATCCTTCTTTGACCCTGCAGGAGGAGGAGACCCAATTTTATACCAGCACTTATTC
>PSFOR109-13|BC-PNEF-PSFOR0081|Callimus abdominalis|COI-5P
AACGCTGTACTTCATTTTCGGAGCGTGGGCCGGAATAGTCGGGACCTCCCTAAGCGTTCTAATTCGATCGGAGCTAGGCACCCCCGGATCATTAATCGGAAATGATCAAATCTATAACGTTATTGTAACGGCCCACGCATTCATTATAATTTTCTTCATAGTAATGCCCATTATAATTGGTGGATTTGGAAATTGATTAGTCCCCCTAATGCTTGGGGCCCCGGACATAGCGTTCCCACGAATAAACAACATAAGATTTTGGCTACTACCTCCCTCCATCACTTTTTTAATTATAAGGAGAGTAGTAGAGAGCGGGGCGGGCACTGGGTGAACAGTCTATCCCCCACTATCCGGTAACGTGGCCCACAGAGGGGCATCAGTTGACCTGGCAATTTTCAGACTTCACTTAGCCGGAGTGTCGTCAATTCTGGGAGCAGTAAACTTTATTTCAACAGTTATTAACATACGCCCAGCAGGAATAGACCCCGATCGAATGCCGCTTTTTGTATGGGCCGTAGTAATCACAGCAGTTCTCCTTTTACTATCCCTACCTGTTCTGGCAGGGGCCATCACCATACTGCTGACAGACCGAAATATCAATACAACCTTTTTTGATCCGGCAGGAGGGGGAGACCCAATCCTGTATCAACACCTTTTC
>PSFOR744-13|BC-PNEF-PSFOR0621|Cardiophorus anticus|COI-5P
AACTTTATACTTTTTATTCGGCGCATGATCAGGAATACTAGGGACTTCATTAAGACTATTAATTCGAGCAGAATTAGGAAGACCTGGGTCATTAATTGGCAATGATCAAATCTACAACGTAATTGTTACCGCACATGCTTTTATTATAATTTTTTTCATAGTTATACCTATCATAATTGGAGGATTTGGAAACTGATTAATCCCCTTAATACTTGGAGCTCCTGATATAGCTTTCCCACGAATAAACAATATGAGATTCTGATTTTTACCCCCTTCATTAAGTCTTCTTCTAATAAGAAGAATTGTAGAAAATGGAGCAGGAACTGGTTGAACAGTTTACCCTCCTTTATCTTCTAATATTGCTCATAGAGGATCATCAGTAGATCTTGCAATTTTCAGACTTCACCTTGCAGGAATCTCCTCAATTCTAGGAGCAGTAAATTTTATCTCCACAGTAATTAATATGCGATCCACAGGTATAACCTTTGAACGTATGCCTCTATTTGTATGGGCAGTTGTAATTACTGCCCTTCTTTTACTTTTATCTTTACCTGTCCTAGCCGGAGCCATCACTATACTATTGACAGATCGAAACTTAAACACCTCATTTTTTGATCCTGCTGGAGGTGGAGACCCAATTCTTTACCAACATCTTTTC
>PSFOR344-13|BC-PNEF-PSFOR0316|Cardiophorus anticus|COI-5P
-----------------------------------------------------------------------------------------------------------------------------------------------------------------------------------------------------------------------------------------------------------TGAGATTCTGATTTTTACCCCCTTCATTAAGTCTTCTTCTAATAAGAAGAATTGTAGAAAATGGAGCAGGAACTGGTTGAACAGTTTACCCTCCTTTATCTTCTAATATTGCTCATAGAGGATCATCAGTAGATCTTGCAATTTTCAGACTTCACCTTGCAGGAATCTCCTCAATTCTAGGAGCAGTAAATTTTATCTCCACAGTAATTAATATGCGATCCACAGGTATAACCTTTGAACGTATGCCTCTATTTGTATGGGCAGTTGTAATTACTGCCCTTCTTTTACTTTTATCTTTACCTGTCCTA---------------------------------------------------------------------------------------------------
>PSFOR746-13|BC-PNEF-PSFOR0623|Cardiophorus ruficollis|COI-5P
AACACTTTACTTCTTATTCGGAGCATGATCCGGAATACTGGGAACCTCTTTAAGCCTTTTAATTCGAGCAGAACTAGGAAGTCCTGGCTCACTAATTGGTAACGACCAAATCTATAATGTAATCGTTACAGCTCACGCCTTTATCATAATTTTCTTTATAGTTATACCAATCATAATCGGAGGATTCGGAAACTGACTAATACCTCTAATATTAGGAGCACCTGATATAGCATTCCCACGAATAAATAACATAAGATTCTGATTCCTACCACCTTCCTTAAGACTCCTCTTAATGAGAAGAATTGTAGAAAATGGAGCAGGAACAGGCTGAACAGTTTACCCTCCTCTTTCATCAAATATTGCCCATAGAGGTTCTTCAGTAGATCTAGCCATTTTCAGACTACACCTAGCCGGGATCTCCTCAATCCTAGGAGCAGTCAATTTCATTTCAACTGTAATTAATATACGATCCCCAGGAATAACTTTTGAACGAATACCTTTATTTGTATGGGCAGTTGTAATCACAGCCCTCCTTCTACTATTATCATTACCTGTATTGGCAGGGGCAATCACTATATTACTAACTGATCGAAACCTAAATACTTCGTTCTTTGACCCCGCAGGTGGAGGAGACCCAATCTTATACCAACACTTGTTC
>PSFOR773-13|BC-PNEF-PSFOR0650|Cardiophorus rufipes|COI-5P
-----------------------------------------------------------------------------------------------------------------------------------------------------------------------------------------------------------------------------------------------------------TGAGATTCTGATTCCTTCCTCCATCATTAAGACTTCTTCTAATAAGAAGAATTGTTGAAAACGGTGCAGGAACTGGTTGAACAGTATACCCACCACTATCCTCAAATATCGCCCACAGAGGGTCATCAGTAGATCTCGCTATTTTTAGCCTTCACCTAGCAGGAATCTCGTCAATTCTGGGAGCAGTAAACTTTATTTCAACCGTAATTAATATACGATCCACAGGAATAACCTTTGAACGTATGCCACTATTTGTATGAGCAGTTGTTATTACAGCCCTACTTCTTTTACTATCATTACCTGTATTAGCCGGTGCCATTACTATACTATTAACTGATCGAAATTTAAACACTTCATTCTTTGACCCTGCTGGAGG-------------------------------
>PSFOR975-14|BC-PSFOR-JD0129|Cardiophorus rufipes|COI-5P
AACTTTATACTTCTTATTCGGCGCATGATCAGGTATACTTGGAACTTCCCTGAGACTTTTAATTCGAGCAGAATTAGGAAGACCTGGATCACTAATTGGAAACGATCAAATCTACAACGTTATTGTTACTGCCCACGCCTTTATCATAATTTTCTTTATAGTTATACCCATTATAATTGGAGGATTCGGAAACTGACTAATCCCATTAATACTAGGAGCTCCTGATATAGCTTTCCCACGAATAAATAATATGAGATTCTGATTCCTTCCTCCATCATTAAGACTTCTTCTAATAAGAAGAATTGTTGAAAACGGTGCAGGAACTGGTTGAACAGTATACCCACCACTATCCTCAAATATTGCCCACAGAGGGTCATCAGTAGATCTCGCTATTTTTAGCCTTCACCTAGCAGGAATCTCGTCAATNCTGGGAGCAGTAAACTTTATTTCAACCGTAATTAATATACGATCCACAGGAATAACCTTTGAACGTATACCACTATTTGTATGAGCAGTTGTTATTACAGCCCTACTTCTTTTACTATCATTACCTGTATTAGCCGGTGCCATTACTATACTATTAACTGATCGAAATTTAAACACTTCATTCTTTGACCCTGCTGGAGGTGGAGACCCAATTCTTTACCAACATCTTTTC
>PSFOR774-13|BC-PNEF-PSFOR0651|Cardiophorus vestigialis|COI-5P
AACTTTATACTTCTTATTCGGTGCATGATCAGGGATACTCGGCACTTCTCTGAGACTTTTAATTCGAGCAGAATTAGGAAGACCTGGATCACTAATTGGAAATGATCAAATCTACAACGTTATTGTTACTGCCCACGCCTTTATTATAATTTTCTTCATAGTTATACCTATCATAATTGGAGGATTCGGAAATTGGTTAATTCCTTTAATACTTGGAGCCCCTGATATAGCTTTTCCACGAATAAACAATATAAGATTTTGATTCCTTCCTCCATCACTAAGTCTTCTTCTAATGAGAAGAATTGTAGAAAATGGAGCAGGAACTGGCTGAACAGTTTATCCCCCTCTTTCTTCAAATATTGCACATAGAGGATCATCAGTAGATCTAGCTATTTTCAGCCTCCACCTAGCAGGAATTTCATCAATTCTGGGTGCAGTAAATTTTATCTCGACTGTAATCAATATACGATCAACAGGTATAACCTTTGAACGTATACCANTATTTGTTTGAGCAGTTGTAATTACAGCCCTTCTACTACTTTTATCATTACCTGTATTAGCTGGAGCTATCACTATACTATTAACAGACCGAAATTTAAACACTTCATTCTTTGACCCTGCTGGAGGGGGAGACCCAATTCTTTACCAACATCTTTTC
>PSFOR095-13|BC-PNEF-PSFOR0067|Cerambyx cerdo|COI-5P
TACCTTATACTTTATTTTTGGTGCCTGAGCAAGAATAGTGGGAACTTCACTAAGAATACTAATTCGAACAGAATTAGGAACTCCAGGATCATTAATTGGAAATGATCAAATCTATAATGTTATTGTAACCGCCCATGCATTCATTATAATTTTTTTCATAGTAATACCAATTATAATTGGAGGATTCGGCAATTGATTGCTACCACTAATATTAGGAGCGCCAGATATAGCATTCCCTCGAATAAACAACATAAGATTCTGACTTTTACCTCCTTCATTAACACTTCTCATCATAAGAAGAATCGTTGAAAATGGAGCAGGGACGGGCTGAACAGTGTACCCACCGCTTTCAGCCAACGTAGCCCACAGAGGTTCCTCTGTAGATTTAGCAATCTTCAGATTACATCTAGCAGGAATTTCTTCCATTTTAGGAGCTGTGAATTTCATTTCTACTGTTATTAACATACGACCAAAAGGCATAAACCCCGATCGTCTAACTCTTTTCGCATGAGCCGTAACAATCACAGCAATCCTACTTCTACTTTCCTTGCCTGTTCTAGCAGGGGCTATCACTATATTGTTAACCGATCGAAACATTAATACATCATTCTTCGACCCAGCAGGAGGAGGAGACCCTATTCTTTACCAACATTTATTT
>PSFOR044-13|BC-PNEF-PSFOR0016|Cerambyx cerdo|COI-5P
-------------------------TGAGCAAGAATAGTGGGAACTTCACTAAGAATACTAATTCGAACAGAATTAGGAACTCCAGGATCATTAATTGGAAATGATCAAATCTATAATGTTATTGTAACCGCCCATGCATTCATTATAATTTTTTTCATAGTAATACCAATTATAATTGGAGGATTCGGCAATTGATTGCTACCACTAATATTAGGAGCGCCAGATATAGCATTCCCTCGAATAAACAACATAAGATTCTGACTTTTACCCCCTTCATTAACACTTCTCATCATAAGAAGAATCGTTGAAAATGGAGCAGGGACGGGCTGAACAGTGTACCCACCGCTTTCAGCCAACGTAGCCCACAGAGGTTCCTCTGTAGATTTAGCAATCTTCAGATTACATCTAGCAGGAATTTCTTCCATTTTAGGAGCTGTGAATTTCATTTCTACTGTTATTAACATACGACCAAAAGGCATAAACCCCGATCGTCTAACTCTTTTCGCATGAGCCGTAACAATCACAGCAATCCTACTTCTACTTTCCTTGCCTGTTCTAGCAGGAGCTATCACTATATTGTTAACCGATCGAAACATTAATACATCATTCTTCGACCCAGCAGGAGGAGGAGACCCTATTCTTTACCAACATTTATTT
>PSFOR111-13|BC-PNEF-PSFOR0083|Cerambyx miles|COI-5P
CACTCTTTACTTTATCCTTGGCGCTTGAGCAGGAATAGTAGGAACATCTTTAAGTATACTAATTCGTACAGAATTAGGCACTCCGGGATCCCTAATTGGAGACGATCAAATCTATAATGTAATTGTAACCGCCCATGCATTCATTATGATTTTTTTCATAGTAATACCAATTATAATTGGAGGATTCGGAAATTGATTAGTTCCACTAATATTAGGAGCACCTGATATAGCATTCCCCCGAATAAACAATATAAGATTCTGGCTTCTACCCCCCTCATTAATTCTCCTAATCATAAGAAGAATTGTAGAAAATGGGGCAGGAACAGGCTGAACTGTGTACCCCCCTCTCTCAGCCAATGTAGCCCATAGTGGGTCTTCTGTAGATCTAGCTATTTTTAGACTACACCTAGCAGGAATCTCATCAATTCTAGGAGCCGTAAACTTTATTTCCACCGCTATTAACATACGACCGCCCAAAACATCCCCTGATCAACTCCCTCTTTTTGTCTGAGCTGTAGTAATCACAGCAGTTTTACTATTACTCTCTTTACCAGTTTTAGCAGGAGCTATTACTATACTCCTAACTGACCGAAACATTAATACATCCTTTTTCGACCCTGCAGGGGGTGGAGACCCTATTCTTTATCAACATTTATTT
>PSFOR439-13|BC-PNEF-PSFOR0411|Cerambyx scopolii|COI-5P
-ACTCTTTACTTTATTTTTGGAGCTTGAGCAGGAATAGTAGGAACATCTTTAAGAATACTAATTCGTTCAGAATTAGGAACTCCCGGATCACTAATTGGAGACGATCAAATTTATAATGTTATTGTAACTGCCCATGCATTCATTATAATTTTTTTCATAGTAATACCAATTATAATTGGAGGATTCGGAAATTGATTAGTACCACTAATATTAGGAGCCCCTGATATAGCATTCCCCCGAATAAACAATATAAGATTCTGATTACTACCCCCTTCACTAATTCTCCTAATCATAAGAAGAATCGTAGAAAATGGAGCAGGAACAGGCTGAACTGTATACCCCCCTCTTTCAGCTAATGTGGCCCATAGTGGATCTTCTGTAGATCTAGCTATTTTTAGGTTACACCTTGCTGGAATCTCGTCGATTCTGGGTGCTGTAAACTTCATTTCTACTGCCATTAACATACGGCCCCCCAAAACATCTCCAGACCAACTTCCTCTTTTTGTGTGAGCTGTAGTAATCACAGCAATTCTACTTTTGTTATCTTTACCAGTTTTAGCTGGAGCTATCACTATACTCCTAACTGATCGAAACATTAATACATCCTTTTTTGATCCCGCAGGAGGAGGAGACCCTATTCTCTATCAACATTTATTC
>PSFOR045-13|BC-PNEF-PSFOR0017|Cerambyx scopolii|COI-5P
TACTCTTTACTTTATTTTTGGAGCTTGAGCAGGAATAGTAGGAACATCTTTAAGAATACTAATTCGTTCAGAATTAGGAACTCCCGGATCACTAATTGGAGACGATCAAATTTATAATGTTATTGTAACTGCCCATGCATTCATTATAATTTTTTTCATAGTAATACCAATTATAATTGGAGGATTCGGAAATTGATTAGTACCACTAATATTAGGAGCCCCTGATATAGCATTCCCCCGAATAAACAATATAAGATTCTGATTACTACCCCCTTCACTAATTCTCCTAATCATAAGAAGAATCGTAGAAAATGGAGCAGGAACAGGCTGAACTGTATACCCCCCTCTTTCAGCTAATGTAGCCCATAGTGGATCTTCTGTAGATCTAGCTATTTTTAGGTTACACCTTGCTGGAATCTCGTCGATTCTGGGTGCTGTAAACTTCATTTCTACTGCCATTAACATACGGCCCCCCAAAACATCTCCAGACCAACTTCCTCTTTTTGTGTGAGCTGTAGTAATCACAGCAATTCTACTTTTGTTATCTTTACCAGTTTTAGCTGGAGCTATCACTATACTCCTAACTGATCGAAACATTAATACATCCTTTTTTGATCCCGCAGGAGGAGGAGACCCTATTCTCTATCAACATTTATTC
>PSFOR023-13|BC-PASSIFOR0023|Cerambyx scopolii|COI-5P
TACTCTTTACTTTATTTTTGGAGCTTGAGCAGGAATAGTAGGAACATCTTTAAGAATACTAATTCGTTCAGAATTAGGAACTCCCGGATCACTAATTGGAGACGATCAAATTTATAATGTTATTGTAACTGCCCATGCATTCATTATAATTTTTTTCATAGTAATACCAATTATAATTGGAGGATTCGGAAATTGATTAGTACCATTAATATTAGGAGCCCCTGATATAGCATTCCCCCGAATAAACAATATAAGATTCTGATTACTACCCCCTTCACTAATTCTCCTAATCATAAGAAGAATCGTAGAAAATGGAGCAGGAACAGGCTGAACTGTATACCCCCCTCTTTCAGCTAATGTGGCCCATAGTGGATCTTCTGTAGATCTAGCTATTTTTAGGCTACACCTTGCCGGAATCTCGTCGATTCTGGGTGCTGTAAACTTCATTTCTACTGCCATTAACATACGGCCCCCCAAAACATCTCCAGACCAACTTCCTCTTTTTGTGTGAGCTGTAGTAATCACAGCAATTCTACTTTTGTTATCTTTACCAGTTTTAGCTGGAGCTATCACTATACTCCTAACTGATCGAAACATTAATACATCCTTTTTTGATCCCGCGGGAGGAGGAGACCCTATTCTCTATCAACATTTATTC
>PSFOR046-13|BC-PNEF-PSFOR0018|Cerambyx welensii|COI-5P
------ATACTTTATTTTTGGTGCCTGAGCAAGAATAGTGGGAACTTCACTAAGAATACTAATTCGAACAGAATTAGGAACTCCAGGGTCATTAATTGGAAATGATCAAATTTATAATGTTATTGTAACCGCCCATGCATTCATTATAATTTTTTTCATAGTAATACCAATTATAATTGGAGGATTCGGCAATTGATTACTACCACTAATATTAGGAGCGCCAGATATAGCATTCCCCCGAATAAACAACATAAGATTCTGACTTTTACCTCCTTCATTAACACTTCTCATCATAAGAAGAATCGTTGAAAATGGGGCCGGAACCGGATGAACAGTATACCCGCCGCTTTCAGCCAACGTAGCCCACAGAGGCTCCTCTGTAGATTTAGCAATCTTCAGATTACATCTAGCAGGAATTTCTTCCATTTTAGGAGCTGTGAATTTCATTTCTACTGTTATTAACATACGACCAAAAGGCATAAACCCCGATCGTCTTACTCTTTTCGTATGAGCCGTAACAATCACAGCAATCTTACTCCTACTTTCCCTACCGGTTCTAGCAGGAGCTATCACTATATTATTAACCGATCGAAACATTAATACATCATTCTTCGACCCTGCAGGGGGAGGAGACCCAATTCTTTACCAACATTTATTT
>PSFOR1048-14|PASSIFOR-NM13-068|Cerophytum elateroides|COI-5P
TACATTATATTTTTTATTTGGATTTTGAAGAGCAATGGTTGGAAGATCAATAAGAATAATTATTCGTATTGAATTAAATAATCCTGGATCTTTTATTAGAAATGATCAAATTTATAACACATTTGTTACAGCTCATGCTTTTGTAATAATTTTTTTTATAGTTATACCTTTAATAATTGGTGGATTTGGAAATTGACTTGTTCCATTAATATTAGGATCTCCAGACATAGCATTTCCTCGAATAAATAATATAAGATTTTGATTACTTCCCCCAAGTTTATCATTATTATTTATAAGTAGATTAAATGAAATGGGTATAGGAACAGGATGAACTGTTTATCCTCCTTTATCTTCTAATATTGCTCATAGAAGATATTCTGTTGATTTATCAATTTTTAGTCTTCATTTGGCTGGAATTTCTTCAATTTTAGGAGCTATTAATTTTATTAGAACTGTTATTAATATACGTCCCTTAATAATAAAATTTGATATTATTCCTTTATTTGTTTGATCAGTTTTAATTACTGCTTTTTTATTATTGCTTTCCTTACCTGTTTTAGCTGGAGCTATTACAATATTATTAACTGATCGAAACTTTAATACATCTTTTTTTGATCCTGTTGGTGGAGGTGACCCTATTCTTTATCAACATTTATTT
>PSFOR478-13|BC-PASSIFOR0051|Cetonia aurata|COI-5P
AACCTTATACTTTTTATTTGGAAGTTGAGCAGGAATAGTAGGCACATCCCTTAGCCTACTCATTCGAGCTGAACTTGGAAATCCCGGATCTTTAATTGGTGATGACCAAATTTATAATGTTATTGTAACAGCTCATGCTTTCATTATAATTTTTTTCATAGTAATACCGGTTATAATTGGTGGATTTGGGAATTGACTTGTACCTTTAATATTAGGAGCCCCTGACATAGCATTTCCCCGAATAAATAACATGAGATTTTGATTATTACCCCCATCGTTAACTTTACTCTTAATGAGAAGATTAGTAGAAAGAGGAGCAGGCACTGGATGAACTGTTTACCCCCCTCTCTCTAGTAACATTGCTCACAGAGGAGCTTCAGTAGATCTAGCTATTTTTAGTTTACACTTAGCAGGGATTTCATCAATTTTAGGAGCAGTAAATTTCATTACTACTGTAATTAACATACGATCAACAGGAATAACATTTGATCGAATACCTTTATTTGTTTGATCAGTTGTATTAACTGCATTATTACTTTTATTATCACTTCCGGTTTTAGCTGGAGCTATTACAATACTTTTAACAGATCGAAATATTAATACCTCATTTTTTGACCCTGCAGGAGGAGGTGACCCAATTTTATACCAACATTTATTT
>PSFOR238-13|BC-PNEF-PSFOR0210|Cetonia aurata|COI-5P
AACCTTATACTTTTTATTTGGAAGTTGAGCAGGAATAGTAGGCACATCCCTTAGCCTACTCATTCGAGCTGAACTTGGAAATCCCGGATCTTTAATTGGTGATGACCAAATTTATAATGTTATTGTAACAGCTCATGCTTTCATTATAATTTTTTTCATAGTAATACCGGTTATAATTGGTGGATTTGGAAATTGACTTGTACCTTTAATATTAGGAGCCCCTGACATAGCATTTCCCCGAATAAATAACATGAGATTTTGATTATTACCCCCATCGTTAACTTTACTCTTAATGAGAAGATTAGTAGAAAGAGGAGCAGGCACTGGATGAACTGTTTACCCCCCTCTCTCTAGTAATATTGCTCATAGAGGAGCTTCAGTAGATCTAGCTATTTTTAGTTTACACTTAGCAGGGATTTCATCAATTTTAGGAGCAGTAAATTTCATTACTACTGTAATTAACATACGATCAACAGGAATAACATTTGATCGAATACCTTTATTTGTTTGATCAGTTGTATTAACTGCATTATTACTTTTATTATCACTTCCGGTTTTAGCTGGAGCTATTACAATACTTTTAACAGATCGAAATATTAATACCTCATTTTTTGACCCTGCAGGAGGAGGTGACCCAATTTTATACCAACATTTATTT
>PSFOR112-13|BC-PNEF-PSFOR0084|Chlorophorus glabromaculatus|COI-5P
AACACTATATTTTATCTTTGGAGCATGAGCAGGAATAGTAGGAACCTCCTTAAGAGTCTTAATTCGGTCAGAACTAGGAAACCCGGGATCCCTGATTGGAGATGATCAAATTTATAATGTTATTGTCACAGCCCATGCATTCATTATAATTTTCTTTATAGTTATGCCAATTATAATTGGTGGATTTGGGAATTGACTAGTACCTCTGATATTGGGAGCCCCAGATATAGCTTTTCCACGAATAAATAATATAAGATTTTGACTTCTACCCCCATCCTTAAGACTTTTGATTATAAGAAGAGTAGTAGAAAATGGTGCAGGAACAGGGTGAACTGTATATCCACCCCTGTCAGCCAACATCGCTCACAGAGGATCGTCTGTAGATTTAGCTATTTTCAGACTTCACTTAGCTGGTATTTCATCAATTCTAGGAGCAGTTAATTTTATCTCAACAGTTATTAATATGCGACCAACAGGAATAAACCTTGAACAAATACCTCTATTTGTATGAGCAGTAGTAATTACAGCCATCCTTTTATTACTGTCTCTTCCCGTTTTAGCAGGAGCAATTACCATATTATTAACAGATCGAAATATCAATACTTCATTTTTTGACCCAGCAGGGGGAGGAGATCCTATTCTATATCAACACTTATTC
>PSFOR114-13|BC-PNEF-PSFOR0086|Chlorophorus ruficornis|COI-5P
CACATTATATTTCATTTTTGGTGCATGAGCAGGAATAGTTGGAACATCATTAAGAATATTAATTCGAACAGAATTAGGAAATCCAGGATCACTAATTGGAAATGATCAAATTTATAATGTAATTGTAACAGCACATGCTTTCATTATAATTTTCTTTATAGTAATACCTATTATAATTGGAGGATTTGGAAATTGACTAGTACCCCTAATACTAGGTGCCCCAGATATAGCATTCCCTCGAATAAACAATATAAGATTCTGGTTACTCCCCCCCTCACTAGGATTATTAATTTTGAGAAGAATTATTGAAAATGGTGCAGGAACAGGTTGAACAATCTATCCTCCATTATCTGCAAATATTTCCCATAGAGGATCTTCTGTAGATCTAGCAATTTTTAGGTTACACTTAGCAGGTATTTCCTCGATTCTAGGAGCAGTAAATTTTATTTCTACAGTAATTAATATACGACCATCAGGAATAAATTTAGAACAAATACCACTATTTGTATGAGCTGTGGTAATCACAGCCATTTTACTATTATTATCATTACCAGTTCTTGCCGGTGCAATTACTATATTATTAACAGACCGAAACATTAATACATCTTTTTTTGACCCAGCAGGAGGAGGTGATCCTATTTTATATCAGCATTTATTC
>PSFOR115-13|BC-PNEF-PSFOR0087|Chlorophorus sartor|COI-5P
--------------TTTTTGGTGCATGAGCAGGAATAGTTGGAACATCATTAAGAATATTAATTCGAACAGAATTAGGAAATCCAGGATCACTAATTGGAAATGATCAAATTTATAATGTAATTGTTACAGCACATGCTTTCATTATAATTTTCTTTATAGTAATACCTATTATAATTGGAGGATTTGGAAATTGACTAGTACCCCTAATACTAGGTGCCCCAGATATAGCATTCCCTCGAATAAACAACATAAGATTCTGGTTACTCCCCCCCTCACTAGGATTATTAATTTTGAGAAGAATTATTGAAAATGGTGCAGGAACAGGTTGAACAGTATATCCTCCATTATCTGCAAATATTTCCCATAGAGGATCTTCTGTAGATCTAGCAATTTTTAGATTACACTTAGCAGGTATTTCCTCGATTCTAGGAGCAGTAAATTTTATTTCTACAGTAATTAATATACGACCATCAGGAATAAATTTAGAACAAATACCACTATTTGTATGAGCTGTGGTAATCACAGCCATTTTACTATTATTATCATTACCAGTTCTCGCCGGTGCAATTACTATATTATTAACAGACCGAAACATTAATACATCTTTTTTTGACCCAGCAGGAGGGGGTGATCCTATTTTATATCAGCATTTATTC
>PSFOR116-13|BC-PNEF-PSFOR0088|Chlorophorus trifasciatus|COI-5P
GACGCTATATTTTATCTTTGGAGCATGAGCAGGAATAGTGGGAACCTCATTGAGAGTATTGATTCGATCAGAATTAGGTAACCCCGGCTCTTTAATTGGAGACGATCAAATTTACAATGTAATCGTTACAGCTCATGCATTTATTATAATTTTCTTCATAGTAATACCCATTATAATTGGAGGATTTGGAAATTGGCTCGTCCCCCTTATATTAGGTGCCCCGGATATGGCATTTCCCCGAATAAACAATATAAGATTTTGACTTCTTCCCCCATCGCTAACATTACTAATCATAAGAAGAATTGTAGAAAACGGAGCTGGAACAGGATGAACAGTTTATCCACCTCTTTCTGCTAACATTGCTCATAGAGGAGCATCAGTAGACTTAGCCATTTTCAGACTACACTTAGCCGGAATCTCCTCAATTCTTGGAGCAGTAAATTTTATTTCTACAGTTATTAATATACGGCCCTCAGGAATAAATCTTGAACAAATACCCCTATTTGTTTGAGCTGTAGTGATTACAGCAATTCTATTGCTTCTTTCTCTTCCTGTTTTAGCAGGAGCCATTACAATACTTTTGACAGACCGAAACATTAATACATCATTCTTTGATCCAGCTGGAGGGGGAGACCCAATTCTATACCAACACCTGTTC
>PSFOR048-13|BC-PNEF-PSFOR0020|Chlorophorus varius|COI-5P
AACCTTGTACTTTATTTTTGGTGCATGAGCAGGAATAGTAGGAACCTCATTAAGAGTTTTAATCCGTTCAGAATTAGGAAACCCCGGATCTCTAATTGGAGATGACCAAATCTATAATGTAATTGTTACAGCCCACGCATTTATTATAATTTTCTTCATAGTTATACCAATTATAATTGGGGGATTTGGAAATTGACTAGTACCACTAATATTAGGAGCACCAGATATAGCATTCCCGCGAATAAACAACATAAGATTCTGACTTCTACCCCCATCACTAAGACTACTAATCATGAGAAGAGTAGTAGAAAACGGAGCAGGTACAGGATGAACAGTTTACCCACCACTATCTTCAAATATTGCTCACAGAGGGTCTTCTGTAGACCTAGCCATCTTCAGACTACACCTAGCAGGAATTTCCTCAATCCTAGGGGCAGTAAATTTTATTTCAACAGTAATTAATATACGACCCGCAGGGATAAATTTAGAACAAATACCCTTATTTGTATGAGCAGTAGTAATTACTGCAATTCTTCTCCTCCTATCCTTACCAGTACTGGCAGGAGCTATTACCATATTATTAACTGATCGAAACATTAACACATCATTTTTCGACCCAGCAGGAGGGGGAGACCCTATCTTATATCAACACTTATTC
>PSFOR703-13|BC-PNEF-PSFOR0580|Choragus sheppardi|COI-5P
---------------------------------------------------------CCTGATTCGTACAGAATTAGGAAACCCCGGATCTTTAATTGGAGATGACCAAATTTATAATGTTATTGTAACTGCTCATGCTTTTATTATAATTTTTTTCATGGTAATACCCACAATAATTGGTGGATTTGGGAATTGACTAGTACCCTTAATACTAGGCGCCCCAGATATGGCTTTTCCTCGAATAAATAATATAAGATTTTGACTTCTCCCTCCCTCATTAACCTTACTTTTACTAAGAAGATTAGTAGAAAGAGGGGCAGGAACAGGGTGAACAGTCTACCCCCCTTTATCTTCAAATATTGCTCACGGAGGCTCTTCTGTTGATTTAGCAATTTTCAGCCTTCATCTAGCCGGAATTTCCTCTATTTTAGGGGCCGTAAATTTTATTACTACAATCATTAATATACGACCTGTTGGAATAACCCCTGATCGAATTCCACTCTTTGTATGAGCAGTAGGAATCACAGCCTTACTTCTTCTTCTTTCTTTACCAGTTTTAGCGGGGGCTATTACTATATTATTAACAGATCGAAATTTAAATACTTCTTTTTTTGACCCTGCTGGAGGGGGTGATCCTATTTTATATCAACATTTATTT
>PSFOR652-13|BC-PNEF-PSFOR0529|Chrysanthia viridissima|COI-5P
TACATTATACTTAATTTTCGGAGCTTGGGCCGGTATAGTTGGAACTTCCCTTAGATTGTTAATCCGAACAGAACTAAGAAATCCTGGTTCATTAATTGGTGATGATCAAATTTACAATGTAATTGTTACAGCTCACGCTTTTATCATAATTTTCTTTATAGTTATACCTATTATAATTGGAGGATTTGGAAATTGATTAGTTCCTTTAATATTAGGAGCCCCTGATATAGCATTCCCTCGAATGAATAATATAAGATTTTGATTGCTCCCCCCATCATTAACTTTATTAATCATGAGAAGAATTGTTGAAAACGGTGCAGGTACTGGATGAACGGTGTACCCCCCACTATCGTCTAATATTGCACATTCAGGATCTTCAGTGGATCTTGCTATTTTTAGCCTTCATTTAGCTGGTATTTCCTCAATTTTAGGAGCAGTTAATTTCATTACTACTATTATTAATATACGGCCTGCAGGTATAACTCTTGATCGAATACCTCTTTTTGTTTGAGCTGTAGTAATTACTGCAGTTCTTCTTCTTCTTTCTCTCCCTGTTTTAGCTGGAGCTATTACTATGCTTTTAACAGATCGAAATTTAAATACTTCTTTTTTTGACCCTGCCGGGGGTGGTGACCCTATTTTATACCAACATTTATTT
>PSFOR584-13|BC-PNEF-PSFOR0461|Chrysobothris affinis|COI-5P
TACATTATACTTTATTTTTGGAGCATGATCCGGAATAGTAGGAACAGCTTTAAGACTTCTAATTCGCGCAGAATTAGGAAATCCTGGAGCTTTAATTGGTGATGATCAAATTTATAATGTAATTGTAACAGCTCATGCTTTTGTTATAATTTTTTTTATAGTTATACCTATTATAATAGGGGGATTTGGTAATTGATTAGTTCCTTTAATATTAGGAGCTCCTGATATAGCTTTCCCTCGAATAAATAATATAAGATTTTGACTTTTACCCCCTTCTTTAACATTTCTATTAATAAGAAGAATTGTAGAAAATGGAGCAGGAACAGGATGAACTGTTTATCCCCCATTAGCTGCTAATATTGCCCACAGAGGAGCATCTGTTGATCTTGCTATTTTTAGTTTACATTTAGCAGGAATTTCATCAATTCTTGGAGCAGTAAATTTTATTACTACTGTAATTAATATACGTTCAATTGGAATATCATTTGATCGAATACCTCTATTTGTATGATCAGTAGCAATTACAGCTTTACTACTTCTTTTATCTCTTCCAGTTTTAGCTGGAGCTATCACTATATTATTAACTGATCGAAATTTAAATACCTCATTTTTTGACCCAGCTGGAGGAGGGGATCCTATTCTTTATCAACACTTATTT
>PSFOR1062-14|PASSIFOR-NM13-082|Cis boleti|COI-5P
AATCCTATATTTTATCTTTGGAACATGATCAGGTATAGTAGGAACATCAATAAGAATATTAATTCGTTCAGAATTAGGTACACCAGGTTCATTAATTGGAAACGACCAAATCTATAACGTAATCGTAACCGCTCATGCATTCGTAATAATTTTCTTCATAGTTATACCAATCATAATTGGTGGATTTGGAAATTGATTAATCCCATTAATATTAGGAGCACCAGATATAGCTTTTCCTCGAATAAATAATATAAGATTTTGATTACTGCCCCCATCATTATCATTATTATTAATAAGAAGAATTGTAGAAAACGGTGCGGGTACAGGTTGAACCGTATACCCTCCTCTCTCATCAAATATTGCACATTCCGGATCATCTGTAGATCTAGCAATTTTCAGGCTTCATCTAGCAGGTATTTCATCAATTCTAGGAGCGGTAAATTTTATTTCAACTGTAATCAATATACGACCTCAAGGAATAAATCTTGACCGAATACCCTTATTTGTATGGGCTGTAGTAATTACAGCAGTACTATTATTATTATCTTTACCTGTATTAGCAGGAGCTATTACAATACTATTAACCGACCGTAATTTCAATACATCATTTTTTGATCCAGCAGGAGGAGGAGATCCTATTCTATATCAACATTTATTT
>PSFOR202-13|BC-PNEF-PSFOR0174|Clamoris crenata|COI-5P
AACCCTTTATTTTATTTTTGGCGCCTGATCCGGTATAGTAGGAACATCCCTCAGAATATTAATTCGTACAGAATTAGGTAACCCCGGATCTCTTATTGGAGACGATCAAATTTATAATGTTATTGTTACAGCCCATNCCTTCATTATAATTTTTTTTATAGTTATACCCATTATAATTGGAGGCTTCGGAAACTGATTAATTCCACTTATACTCGGAGCCCCTGATATAGCGTTCCCTCGAATGAATAATATAAGATTCTGGCTTCTGCCCCCATCTCTTACTCTTCTAATTATAAGAAGAGTAGTAGAAAATGGAGCCGGCACAGGATGAACAGTGTACCCCCCACTGTCATCCAATATTTCTCATAGAGGCTCTTCAGTCGATTTAGCTATTTTTAGTCTTCACTTAGCTGGAGTATCATCAATTTTAGGAGCAGTTAACTTCATTACTACCGTTATTAACATACGACCTCAAGCTATAACATTTGATCGAATACCTTTATTTGTATGAGCTGTAGTAATTACTGCTGTTTTATTACTTCTATCTCTGCCGGTCTTAGCCGGAGCCATCACTATACTTTTAACAGACCGAAATTTAAACACCTCATTCTTTGACCCTGCAGGAGGAGGTGACCCGATTCTATA-------------
>PSFOR990-14|PASSIFOR-NM13-010|Clerus mutillarius|COI-5P
AACATTATATTTCCTTTTCGGCGCTTGAGCAGGAATAGTGGGGACATCTTTAAGATTATTAATTCGATCAGAGCTTGGAACCCCTGGAACCTTAATTGGTAATGATCAAATTTACAATGTAATTGTTACAGCTCATGCTTTTATTATAATTTTCTTTATAGTTATACCTATTATAATCGGTGGATTTGGTAATTGATTAGTACCTTTAATATTAGGAGCCCCTGATATAGCTTTTCCTCGAATAAATAATATAAGATTTTGATTGTTGCCCCCTTCATTAACTTTATTATTAATAAGAAGAATAGTAGAAAGCGGAGCTGGTACAGGATGAACTGTTTACCCGCCTCTGTCTTCTAATATCGCACATGGTGGCTCTTCTGTAGATCTTGCTATTTTTAGCTTACATTTAGCAGGAGTCTCCTCTATTCTAGGGGCTGTAAATTTTATTACAACAGTAATTAATATGCGACCTGAAGGAATAACTTTAGATCGAACACCCTTATTTGTTTGAGCTGTCGCAATTACTGCTCTTTTACTACTACTTTCATTACCTGTATTAGCGGGCGCAATTACAATATTATTAACAGACCGTAATTTAAATACATCTTTTTTTGATCCAGCCGGTGGAGGAGACCCTATTTTATACCAACATTTATTT
>PSFOR436-13|BC-PNEF-PSFOR0408|Clytus arietis|COI-5P
GACCTTATATTTCATTTTTGGAGCATGAGCAGGAATAGTAGGAACATCCCTTAGAGTTCTAATTCGATCAGAACTAGGAAATCCTGGATCCCTGATTGGAGATGATCAAATTTACAATGTAATTGTTACAGCCCACGCATTCATTATAATTTTCTTTATAGTAATACCCATCATAATTGGAGGATTCGGGAATTGACTGGTACCACTAATATTAGGAGCACCAGATATAGCTTTTCCACGAATAAATAATATAAGATTTTGATTATTACCTCCATCCCTCGCGCTACTGATCATGAGAAGAGTTGTTGAAAGAGGAGCAGGAACAGGTTGAACAGTGTACCCCCCACTGTCTGCCAATGTAGCCCACAGAGGGTCATCTGTTGATTTAGCAATTTTTAGACTCCATTTAGCAGGAGTATCATCTATTCTAGGTGCTGTAAATTTTATTTCTACAGTTATTAATATACGACCAACAAAAATAAGACCTGAGCAAATACCCCTATTTGTTTGGGCAGTAGCAATTACAGCCCTTTTACTTCTTCTATCACTTCCAGTATTAGCTGGAGCAATTACTATACTCCTTACAGACCGAAATATTAATACTTCCTTCTTCGACCCAGCAGGAGGAGGTGATCCAATCCTATACCAACATTTATTT
>PSFOR890-14|BC-PASSIFOR0109|Clytus arietis|COI-5P
GACCTTATATTTCATTTTTGGAGCATGAGCAGGAATAGTAGGAACATCCCTTAGAGTTCTAATTCGATCAGAACTAGGAAATCCCGGATCCCTGATTGGAGATGATCAAATTTACAATGTAATTGTTACAGCCCACGCATTCATTATAATTTTCTTTATAGTAATACCCATCATAATTGGAGGATTCGGGAATTGACTGGTACCACTAATATTAGGAGCACCAGATATAGCTTTTCCACGAATAAATAATATAAGATTTTGATTATTACCTCCATCCCTCGCGCTACTGATCATGAGAAGAGTTGTTGAAAGAGGAGCAGGAACAGGTTGAACAGTGTACCCCCCACTGTCTGCCAATGTAGCCCACAGAGGGTCATCTGTTGATTTAGCAATTTTTAGACTCCATTTAGCAGGAGTATCATCTATTCTAGGTGCTGTAAATTTTATTTCTACAGTTATTAATATACGACCAACAAAAATAAGACCTGAGCAAATACCCCTATTTGTTTGGGCAGTAGCAATTACAGCCCTTTTACTTCTTCTATCACTTCCAGTATTAGCTGGAGCAATTACTATACTCCTTACAGACCGAAATATTAATACTTCCTTCTTCGACCCAGCAGGAGGAGGTGATCCAATCCTATACCAACATTTATTT
>PSFOR118-13|BC-PNEF-PSFOR0090|Clytus lama|COI-5P
AACCTTATATTTCATTTTTGGAGCATGAGCAGGAATGGTAGGAACATCTCTTAGAGTTTTAATTCGATCAGAACTAGGAAATCCCGGATCCTTAATTGGAGATGATCAAATTTACAATGTAATCGTTACAGCCCATGCATTCATTATAATTTTCTTTATAGTTATACCCATCATAATTGGAGGATTTGGAAATTGATTAGTACCACTAATATTAGGTGCACCAGATATAGCTTTCCCACGAATAAACAATATAAGATTTTGATTATTACCTCCATCCCTTGCACTACTAATCATAAGAAGAATTGTTGAAAGAGGGGCAGGAACGGGTTGAACAGTGTATCCCCCACTGTCTGCCAACGTAGCTCACAGAGGATCATCTGTTGATTTAGCAATTTTTAGACTCCATCTAGCAGGAGTATCTTCTATTCTAGGTGCCGTAAATTTTATTTCTACAGTTATTAATATACGACCAACAAAAATAAGACCTGAACAAATACCTTTATTTGTTTGAGCCGTAGCAATCACAGCACTCCTTCTTCTCCTATCACTCCCAGTATTGGCTGGAGCCATTACTATACTTCTTACAGACCGAAATATCAATACTTCCTTCTTTGACCCAGCAGGAGGGGGTGATCCAATCTTATATCAACATCTATTT
>PSFOR119-13|BC-PNEF-PSFOR0091|Clytus rhamni|COI-5P
AACTTTATATTTCATCTTTGGGGCATGAGCAGGAATAGTAGGAACATCTTTAAGAGTATTAATTCGATCAGAACTCGGAAATCCGGGCTCTTTAATCGGAGACGACCAAATTTACAATGTAATCGTTACAGCTCATGCATTTATTATAATTTTCTTCATAGTTATACCTATTATAATTGGAGGATTTGGAAATTGATTAGTCCCATTAATATTAGGAGCACCTGATATAGCATTTCCCCGAATAAATAATATAAGATTCTGATTACTCCCCCCGTCCCTAGCGCTGCTAATTATAAGAAGAATTGTCGAAAGAGGAGCAGGAACAGGTTGAACAGTTTACCCCCCACTGTCAGCCAATGTAGCCCACAGAGGATCTTCTGTAGATTTAGCAATTTTTAGATTACATTTAGCAGGAGTATCTTCTATCCTAGGTGCAGTAAACTTTATTTCTACAGTTATCAATATACGACCAACAAAAATAAGATCTGAACAAATACCATTATTTGTATGAGCTGTAGCAATTACAGCCCTACTACTTCTTCTATCCCTTCCGGTTCTAGCTGGAGCGATCACTATACTACTTACGGATCGAAACATCAATACCTCATTCTTTGACCCAGCAGGAGGAGGAGACCCAATTCTCTACCAACACTTATTC
>PSFOR437-13|BC-PNEF-PSFOR0409|Clytus tropicus|COI-5P
AACTTTATATTTCATTTTTGGAGCATGAGCAGGAATAGTTGGAACTTCAATAAGAGTTCTAATTCGAACAGAATTAGGAAATCCTGGATCCTTAATTGGAGATGATCAAATTTACAATGTTATTGTCACAGCCCATGCATTTATTATAATTTTCTTCATAGTTATACCAATTATAATAGGAGGATTCGGAAACTGGTTAGTACCTTTAATATTAGGAGCTCCAGATATAGCATTCCCTCGAATAAATAATATAAGATTTTGATTACTCCCCCCATCTCTAACACTCCTAATTATAAGAAGAATTGTAGAAAGAGGAGCAGGAACAGGTTGAACAGTTTACCCCCCGCTGTCCGCCAATGTAGCCCATAGAGGCTCTTCTGTAGATCTAGCAATTTTTAGACTTCACTTAGCAGGAATCTCTTCAATTTTAGGCGCTGTAAATTTTATTTCTACAGTAATTAATATACGACCAGCAAATATAAGACCCGAACAAATACCTTTATTTGTTTGAGCCGTAATTATTACAGCAATTCTACTTCTTCTTTCCCTCCCAGTATTAGCAGGAGCTATTACAATACTTTTAACAGATCGAAATATTAATACCTCATTCTTTGACCCAGCAGGAGGAGGTGATCCTATTCTTTATCAACATTTATTT
>PSFOR789-13|BC-PNEF-PSFOR0666|Colobicus hirtus|COI-5P
TACATTATATTTCATTTTCGGTGCCTGATCAGGCATGGTCGGCACCTCTCTAAGATTACTGATTCGTACAGAATTAGGTAACCCTGGTTCTTTAATTGGAGATGACCAGATTTATAATGTTATTGTTACAGCCCATGCATTTATTATAATTTTTTTTATAGTAATACCAGTTATAATAGGTGGATTTGGAAATTGACTAGTACCCCTAATACTAGGAGCCCCCGATATAGCATTTCCTCGAATGAACAATATAAGATTTTGGCTTTTACCCCCATCGCTTACTTTATTGATCATAAGAAGAATTGTAGAAAACGGAGCAGGGACAGGATGGACAGTTTACCCCCCACTTTCATCCAATATTGCTCACGGAGGTTCATCTGTAGATTTAGCAATTTTCAGCCTTCACCTAGCAGGTATTTCGTCTATTCTAGGTGCAGTAAATTTCATTACAACTGTCATTAATATACGACCTAAGGGAATAACCTTAGACCGAATACCGTTATTTGTGTGAGCAGTTACTCTTACTGCCATTCTTCTTCTTCTTTCTCTCCCTGTTCTTGCTGGGGCAATTACTATATTACTTACAGATCGAAATTTAAATACCTCTTTCTTTGACCCCGCCGGAGGAGGAGATCCTATTCTTTATCAACATTTATTT
>PSFOR911-14|BC-PASSIFOR0130|Colon latum|COI-5P
----------------------------------------GGAACTTCCCTTAGACTACTAATTCGAGCAGAGCTTGGAAATCCCGGATCTTTAATCGGAGATGATCAAATTTATAATGTAATTGTCACTGCACATGCATTTGTTATGATTTTCTTCATAGTAATACCTATTGTTATTGGAGGCTTTGGAAATTGATTAGTTCCATTAATGCTAGGTGCCCCAGACATAGCATTCCCTCGAATAAACAATATAAGATTTTGATTACTCCCTCCATCCTTAACTCTACTTTTAATAAGAAGATTAGTAGAAAGAGGAGCAGGAACTGGATGAACAGTGTATCCCCCACTTTCATCAAATATTGCTCACGGAGGCTCTTCAGTTGACTTAGCTATTTTTAGATTACATTTAGCAGGTATTTCATCAATTTTAGGAGCAGTAAATTTTATTACCACTGTAATTAATATGCGATCTCAAGGAATAGGGTTTGACCAAATACCTTTATTTGTATGATCAGTTATTATTACTGCTTTACTTTTACTTTTATCTTTACCTGTTTTAGCTGGTGCAATTACTATACTATTAACTGACCGGAATTTAAATACTTCTTTTTTTGATCCCGCAGGTGGTGGAGATCCAATTTTATACCAACATTTATTT
>PSFOR784-13|BC-PNEF-PSFOR0661|Colposis mutilatus|COI-5P
CACTTTGTATTTCATTTTTGGTGCTTGATCAGGCATAGTTGGAACGTCTCTTAGACTTTTAATTCGAGCAGAATTAGGTAATCCCGGATCTTTAATTGGTGATGACCAGATTTATAATGTTATTGTCACAGCCCATGCTTTTGTAATAATTTTTTTTATAGTTATGCCCATTATAATTGGTGGATTCGGAAACTGGCTAGTTCCATTAATATTAGGAGCCCCAGATATAGCTTTTCCTCGAATAAATAATATAAGATTTTGACTACTTCCCCCTTCCCTAACCCTTTTAATTATAAGCAGTATTGTTGAAAGAGGGGCAGGCACTGGGTGAACAGTCTACCCTCCTTTAGCTGCAAATATTGCCCATGGAGGTTCTTCAGTTGACCTCGCAATTTTTAGGCTTCATCTAGCAGGAATTTCTTCTATTTTAGGAGCCGTAAATTTTATTACTACAGTTATTAATATACGGCCTTTAGGTATAAGATTCGATCGTATACCTCTTTTTGTATGAGCTGTTGTAATTACTGCAGTTCTTCTTTTACTCTCCTTACCAGTTCTTGCGGGAGCAATCACTATACTTTTAACTGACCGGAATTTAAATACTTCATTTTTTGACCCAGCAGGAGGCGGTGATCCAATTCTTTACCAACACTTATTT
>PSFOR791-13|BC-PNEF-PSFOR0668|Colydium elongatum|COI-5P
AACTTTATATTTTATTTTTGGAGCTTGATCTGGAATAGTAGGAACTTCTATAAGACTTTTAATTCGAGCTGAATTAGGGAATCCAGGCTCATTAATTGGAGACGATCAAATTTATAATGTAATTGTTACAGCTCATGCCTTTATTATAATTTTCTTTATAGTAATACCAATTATAATTGGAGGATTTGGAAATTGATTAGTTCCTTTAATATTAGGAGCACCTGATATAGCTTTTCCTCGAATAAATAATATAAGATTTTGATTATTACCTCCCTCACTAACTCTTCTTTTAATAAGAAGAGTAGTAGAAAATGGAGCAGGAACAGGATGAACAGTATACCCTCCTCTTTCATCCAATATTGCCCATAGAGGATCTTCAGTTGATTTAGCTATTTTTAGATTACATTTAGCTGGAATTTCATCAATTTTAGGAGCTGTAAATTTTATTACTACTGTTATTAATATACGTCCTATTGGAATAAGATTTGATCGAATACCTTTATTTGTTTGAGCAGTAGTAATTACTGCAATTCTATTATTATTATCATTACCAGTATTAGCAGGAGCAATTACAATACTTTTAACAGATCGAAATTTAAATACCTCATTTTTTGATCCAGCTGGAGGAGGTGATCCAATTTTATATCAACATTTATTT
>PSFOR264-13|BC-PNEF-PSFOR0236|Conopalpus brevicollis|COI-5P
AACTCTCTATTTCATCTTTGGTGCTTGATCTGGTATAGTAGGTACTTCTTTAAGACTTTTAATTCGTTCAGAACTCGGAAATCCCGGATCTTTAATTGGAGATGACCAAATTTATAATGTAATTGTTACCGCTCATGCTTTTATTATAATTTTTTTTATAGTTATACCAATTTTAATTGGTGGATTTGGAAATTGACTAGTTCCTCTAATACTAGGAGCCCCTGATATAGCCTTTCCTCGAATAAACAATATAAGATTTTGGCTCCTCCCTCCTTCATTAACACTCTTAATTATAAGAAGAGTAGTTGAAAATGGGGCTGGAACTGGTTGAACAGTTTATCCTCCTTTAGCTTCAAATATTGCCCATAGAGGAGCCTCAGTTGATTTGGCTATTTTTAGTTTACATTTAGCTGGAGTGTCTTCAATTTTAGGGGCAGTAAATTTTATTACAACCGTAATTAATATACGACCTCCCGGAATATCTTTTGATCAAATACCCTTATTTGTCTGAGCTGTAGTTATTACTGCAGTTTTATTATTACTTTCTCTCCCTGTTCTTGCAGGAGCAATCACTATACTTTTAACAGACCGAAATTTAAACACCTCTTTTTTTGACCCCGCTGGAGGCGGTGACCCAATCCTTTACCAACATTTATTT
>PSFOR863-14|BC-PASSIFOR0081|Conopalpus testaceus|COI-5P
AACTTTATATTTCATTTTTGGTGCCTGATCAGGAATAGTAGGAACATCTTTAAGATTACTAATTCGATCTGAACTAGGAAATCCCGGCTCTTTAATTGGAGATGATCAAATTTACAATGTAATCGTAACTGCCCATGCATTTATTATAATTTTCTTTATAGTTATACCAATTTTAATTGGAGGGTTTGGAAATTGACTTGTCCCATTAATATTAGGGGCTCCCGATATAGCATTTCCTCGAATAAATAATATAAGATTTTGATTGCTCCCACCTTCACTAACTTTATTGATTATAAGAAGAGTTGTTGAAAATGGTGCTGGAACTGGATGAACAGTATATCCTCCTTTAGCTTCAAATATTGCTCATAGAGGAGCTTCAGTTGATTTAGCAATTTTCAGTTTACATTTAGCAGGTGCTTCTTCCATTTTAGGTGCTGTAAACTTCATTACTACAGTAATTAATATGCGACCTCCTGGAATATCTTTCGACCAAATACCTTTGTTTGTTTGAGCAGTAGTAATTACTGCAATTTTATTACTTCTTTCTTTACCCGTTCTTGCGGGAGCAATTACTATACTACTTACTGACCGAAATTTAAATACTTCTTTTTTTGATCCTGCTGGAGGAGGAGATCCAATTCTTTACCAACATCTATTT
>PSFOR367-13|BC-PNEF-PSFOR0339|Conopalpus testaceus|COI-5P
AACTTTATATTTCATTTTTGGTGCCTGATCAGGAATAGTAGGAACATCTTTAAGATTACTAATTCGATCTGAACTAGGAAATCCCGGCTCTTTAATTGGAGATGATCAAATTTACAATGTAATCGTAACTGCCCATGCATTTATTATAATTTTCTTTATAGTTATNCCAATTNTAATTGGAGGGTTTGGAAATTGACTTGTCCCATTAATATTAGGGGCTCCCGATATAGCATTTCCTCGAATAAATAATATAAGATTTTGATTGCTCCCACCTTCACTAACTTTATTGATTATAAGAAGAGTTGTTGAAAATGGTGCTGGAACTGGATGAACAGTATATCCTCCTTTAGCTTCAAATATTGCTCATAGAGGAGCTTCAGTTGATTTAGCAATTTTCAGTTTACATTTAGCAGGTGCTTCTTCCATTTTAGGTGCTGTAAACTTCATTACTACAGTAATTAATATGCGACCTCCTGGAATATCTTTCGACCAAAT-------------------------------------------------------------------------------------------------------------------------------------------------------------------
>PSFOR192-13|BC-PNEF-PSFOR0164|Corticeus bicolor|COI-5P
AACCCTTTACTTCATTTTTGGTGCATGATCCGGAATAATCGGAACATCTTTAAGACTCCTAATTCGAGCAGAACTTGGCAACCCTGGTTCACTTATTGGGGACGATCAAATTTATAACGTTATCGTTACAGCCCATGCATTCATTATAATTTTTTTCATAGTTATACCAATCATAATAGGAGGATTCGGAAACTGACTAGTACCACTTATACTGGGTGCACCAGACATAGCCTTCCCCCGAATAAACAACATAAGATTTTGACTCCTACCCCCATCCTTAACACTTTTATTAATAAGAAGTATTGTAGAAAGAGGAGCAGGAACAGGATGAACAGTGTACCCCCCACTGTCATCTAATATTGCTCACGGTGGAGCCTCAGTCGATTTAGCTATTTTTAGGCTCCATTTAGCTGGAATTTCTTCAATTCTAGGAGCAGTTAATTTTATTACTACAGTAATTAACATACGGCCTATAGGAATAACTTTTGATCGAATACCTCTATTTGTGTGAGCTGTAGTATTAACGGCAGTACTTCTTCTTCTCTCACTTCCTGTTCTAGCAGGAGCAATTACAATGCTATTAACAGATCGAAACCTAAATACATCATTTTTTGACCCCGCAGGAGGTGGAGACCCAATTTTATACCAACACTTGTTT
>PSFOR194-13|BC-PNEF-PSFOR0166|Corticeus linearis|COI-5P
AACTCTATACTTTATTTTTGGAGCTTGATCAGGAATAATTGGAACATCCCTTAGACTATTAATTCGAGCAGAATTAGGAAATCCAGGATCTCTAATTGGAGACGATCAAATTTATAATGTAATCGTCACAGCTCATGCTTTTATTATAATTTTCTTTATAGTTATGCCAATTATAATAGGAGGATTTGGAAATTGATTGGTACCATTGATATTAGGTGCACCAGATATAGCTTTCCCTCGAATAAATAATATAAGATTTTGATTACTTCCACCTTCATTAACTCTTCTTTTAATAAGAAGAGTTGTAGAAAGAGGAGCAGGTACAGGATGAACAGTTTACCCCCCACTTTCATCTAATATTGCTCATGGAGGAGCCTCAGTTGACCTTGCTATTTTTAGTCTTCACTTAGCTGGAATCTCGTCTATTCTTGGAGCTGTAAACTTTATTACAACAGTAATTAATATACGACCCCAAGGAATAACTTTCGACCGAATACCATTATTTGTATGAGCAGTAGTATTAACTGCTATTCTATTGCTATTATCACTTCCAGTTCTAGCTGGAGCAATTACTATACTACTAACTGATCGAAATTTAAATACCTCATTCTTTGATCCCGCAGGAGGTGGAGACCCAATTCTTTACAAGCATTTATTT
>PSFOR232-13|BC-PNEF-PSFOR0204|Corticeus pini|COI-5P
AACACTTTACTTTATTTTTGGAGCTTGATCAGGAATAGTGGGCACATCACTAAGACTTTTAATTCGAGCTGAATTAGGAAACCCTGGATCATTAATTGGGGACGATCAAATTTATAATGTAATCGTTACAGCTCATGCATTCATTATAATTTTCTTTATAGTTATACCAATCATAATAGGAGGATTTGGGAATTGGTTGGTTCCTCTTATATTAGGAGCACCGGATATAGCTTTCCCACGAATAAATAACATAAGATTTTGATTATTACCTCCTTCACTAACCCTTTTACTTATAAGAAGAGTAGTAGAGAGAGGAGCAGGAACTGGATGAACAGTTTACCCCCCACTTTCATCCAATATTGCACATGGAGGAGCATCTGTTGATTTAGCAATTTTTAGTCTACATCTAGCTGGAATCTCATCAATTTTAGGGGCTGTTAATTTTATTACTACTGTAATTAATATGCGACCTCAAGGAATAACTTTTGATCGAATACCTTTATTTGTTTGAGCAGTTGTATTAACAGCAGTTCTTCTTCTATTATCACTACCAGTTCTAGCAGGTGCCATTACAATATTACTAACAGATCGAAATTTAAATACCTCATTCTTTGATCCAGCAGGAGGAGGAGATCCTATTTTATACCAGCATTTATTC
>PSFOR233-13|BC-PNEF-PSFOR0205|Corticeus pini|COI-5P
AACACTTTACTTTATTTTTGGAGCTTGATCAGGAATAGTGGGCACATCACTAAGACTTTTAATTCGAGCTGAATTAGGAAACCCTGGATCATTAATTGGGGACGATCAAATTTATAATGTAATCGTTACAGCTCATGCATTCATTATAATTTTCTTTATAGTTATACCAATCATAATAGGAGGATTTGGAAATTGGTTGGTTCCTCTTATATTAGGAGCACCGGATATAGCTTTCCCACGAATAAATAACATAAGATTTTGATTATTACCTCCTTCACTAACCCTTTTACTTATAAGAAGAGTAGTAGAGAGAGGAGCAGGAACTGGATGAACAGTTTACCCCCCACTTTCATCCAATATTGCACATGGAGGAGCATCTGTTGATTTAGCAATTTTTAGTCTACATCTAGCTGGAATCTCATCAATTTTAGGGGCTGTTAATTTTATTACTACTGTAATTAATATGCGACCTCAAGGAATAACTTTTGATCGAATACCTTTATTTGTTTGAGCAGTTGTATTAACAGCAGTTCTTCTTCTATTATCACTACCAGTTCTAGCAGGTGCCATTACAATATTACTAACAGATCGAAATTTAAATACCTCATTCTTTGATCCAGCAGGAGGAGGAGATCCTATTTTATACCAGCACTTATTC
>PSFOR204-13|BC-PNEF-PSFOR0176|Corticeus unicolor|COI-5P
AACATTATATTTCATTTTTGGAGCATGATCTGGAATAGTAGGAACTTCATTAAGACTCCTGATTCGTGCAGAGCTGGGAAACCCAGGATCGTTAATTGGAGATGACCAAATTTATAATGTTATTGTAACAGCCCATGCCTTTATTATAATTTTCTTTATAGTTATACCTATCATAATAGGAGGATTTGGAAATTGATTAGTTCCCTTAATACTCGGTGCCCCAGATATAGCATTTCCTCGAATAAATAACATAAGATTTTGGCTTCTACCCCCATCTCTTTCATTGCTATTAATAAGAAGAATAGTAGAGAGAGGAGCAGGAACTGGATGAACAGTATACCCCCCGCTTTCATCCAACATTGCTCATAGAGGGTCTTCAGTAGATTTAGCAATTTTTAGGTTACATTTAGCAGGAATTTCATCCATTCTTGGGGCAGTAAATTTTATCACTACAGTGATTAATATACGTCCACTAGGAATATCATTTGATCGAATGCCTTTATTTGTTTGAGCTGTAGCTATCACAGCAGTTCTTCTCCTTTTATCTCTTCCAGTTCTAGCAGGAGCTATCACAATATTATTAACAGATCGAAATTTAAATACTTCATTTTTTGACCCCGCAGGAGGGGGAGATCCAATTTTATATCAACATTTATTC
>PSFOR393-13|BC-PNEF-PSFOR0365|Corticeus unicolor|COI-5P
----------------------------------------------------------------------------GGAAACCCAGGATCGTTAATTGGAGATGACCAAATTTATAATGTTATTGTAACAGCCCATGCCTTTATTATAATTTTCTTTATAGTTATACCTATCATAATAGGAGGATTTGGAAATTGATTAGTTCCCTTAATACTCGGTGCCCCAGATATAGCATTTCCTCGAATAAATAACATAAGATTTTGGCTTCTACCCCCATCTCTTTCATTGCTATTAATAAGAAGAATAGTAGAGAGAGGAGCAGGAACTGGATGAACAGTATACCCCCCGCTTTCATCCAACATTGCTCATAGAGGGTCTTCAGTAGATTTAGCAATTTTTAGGTTACATTTAGCAGGAATTTCATCCATTCTTGGGGCAGTAAATTTTATCACTACAGTGATTAATATACGTCCACTAGGAATATCATTTGATCGAATGCCTTTATTTGTTTGAGCTGTAGCTATCACAGCAGTTCTTCTCCTTTTATCTCTTCCAGTTCTAGCAGGAGCTATCACAATATTATTAACAGATCGAAATTTAAATACTTCATTTTTTGACCCCGCAGGAGGGGGAGATCCAATTTTATATCAACATTTATTC
>PSFOR120-13|BC-PNEF-PSFOR0092|Cortodera femorata|COI-5P
AACTCTATATTTTATCTTTGGGGCTTGGGCTGGAATAGTCGGGACATCTTTAAGTTTATTAATTCGATCAGAATTAGGTAACCCTGGTTCATTAATTGGTGATGATCAAATTTATAATGTTATTGTTACAGCACATGCTTTTATCATAATTTTTTTTATAGTTATACCTATTATAATTGGTGGATTTGGAAATTGATTAGTTCCTTTAATATTAGGGGCTCCAGATATAGCCTTCCCTCGAATAAATAATATAAGATTCTGATTATTGCCACCCTCATTAACTTTACTTATTATAAGAAGAATCGTAGAAAAAGGTGCTGGAACAGGATGAACAGTTTACCCTCCCCTATCATCAAATATTGCCCATGGTGGTTCATCAGTTGATTTGGCTATTTTTAGCCTCCATTTAGCAGGAATTTCATCTATTTTAGGTGCAGTAAATTTTATCACCACAGTAATTAATATACGACCAAGAGGAATAACTTTAGACCGAATACCCTTATTTGTTTGAGCAGTTGTAATTACTGCTATTCTTTTATTATTGTCTTTACCTGTTTTAGCTGGGGCAATTACTATACTTCTAACAGACCGAAATCTTAATACATCATTTTTTGACCCAGCTGGAGGGGGTGATCCTATTCTTTATCAACATTTATTT
>PSFOR446-13|BC-PNEF-PSFOR0418|Cortodera humeralis|COI-5P
AACTCTATATTTTATCTTTGGAGCTTGGGCTGGGATAGTTGGTACATCTTTAAGATTATTAATTCGTTCAGAATTAGGTAATCCTGGTTCACTAATTGGGGATGACCAGATTTATAATGTTATTGTTACAGCACATGCTTTTATTATAATTTTTTTTATAGTTATACCTATTATAATTGGTGGATTTGGTAACTGATTAGTTCCATTAATATTAGGGGCCCCAGATATAGCCTTTCCTCGAATAAACAATATAAGATTCTGGTTATTACCCCCCTCATTAACTTTACTTATTATAAGGAGAATTGTAGAAAAGGGTGCAGGAACAGGATGAACAGTTTACCCTCCTCTATCATCAAATATTGCTCACGGTGGCTCATCAGTTGATTTAGCTATTTTTAGTCTTCATTTAGCAGGAATCTCATCTATTTTAGGTGCAGTTAATTTTATTACTACTGTAATCAATATACGACCTAAAGGAATAACCTTAGATCGAATACCCCTATTTGTTTGAGCAGTTGTAATTACTGCTATTCTTTTATTACTATCTTTACCTGTATTAGCTGGGGCTATTACTATACTTCTAACAGATCGAAATTTAAATACATCATTTTTTGATCCGGCTGGAGGAGGTGACCCTATTCTTTATCAGCACTTATTT
>PSFOR121-13|BC-PNEF-PSFOR0093|Cortodera humeralis|COI-5P
AACTCTATATTTTATCTTTGGTGCTTGGGCTGGGATAGTTGGTACATCTTTAAGATTATTAATTCGTTCAGAATTAGGTAATCCTGGTTCACTAATTGGGGATGACCAGATTTATAATGTTATTGTTACAGCACATGCTTTTATTATAATTTTTTTTATAGTTATACCTATTATAATTGGTGGATTTGGTAACTGATTAGTTCCATTAATATTAGGGGCCCCAGATATAGCCTTTCCTCGAATAAACAATATAAGATTCTGGTTATTACCCCCTTCATTAACTTTACTTATTATAAGGAGAATTGTAGAAAAGGGTGCAGGAACAGGATGAACAGTTTACCCTCCTCTATCATCAAATATTGCTCACGGTGGCTCATCAGTTGATTTAGCTATTTTTAGTCTTCATTTAGCAGGAATCTCATCTATTTTAGGTGCAGTTAATTTTATTACTACTGTAATCAATATACGACCTAAAGGAATAACCTTAGATCGAATACCTCTATTTGTTTGAGCAGTTGTAATTACTGCTATTCTTTTATTACTATCTTTACCTGTATTAGCTGGGGCTATTACTATACTTCTAACAGATCGAAATTTAAATACATCATTTTTTGATCCGGCTGGAGGAGGTGACCCCATTCTTTATCAGCACTTATTT
>PSFOR025-13|BC-PASSIFOR0025|Cortodera humeralis|COI-5P
AACTCTATATTTTATCTTTGGTGCTTGGGCTGGGATAGTTGGTACATCTTTAAGATTATTAATTCGTTCAGAATTAGGTAATCCTGGTTCACTAATTGGGGATGACCAGATTTATAATGTTATTGTTACAGCACATGCTTTTATTATAATTTTTTTTATAGTTATACCTATTATAATTGGTGGATTTGGTAACTGATTAGTTCCATTAATATTAGGGGCCCCAGATATAGCCTTTCCTCGAATAAACAATATAAGATTCTGGTTATTACCCCCCTCATTAACTTTACTTATTATAAGGAGAATTGTAGAAAAGGGTGCAGGAACAGGATGAACAGTTTACCCTCCTCTATCATCAAATATTGCTCACGGTGGCTCATCAGTTGATTTAGCTATTTTTAGTCTTCATTTAGCAGGAATCTCATCTATTTTAGGTGCAGTTAATTTTATTACTACTGTAATCAATATACGACCTAAAGGAATAACCTTAGATCGAATACCTCTATTTGTTTGAGCAGTTGTAATTACTGCTATTCTTTTATTACTATCTTTACCTGTATTAGCTGGGGCTATTACTATACTTCTAACAGATCGAAATTTAAATACATCATTTTTTGATCCGGCTGGAGGAGGTGACCCCATTCTTTATCAGCACTTATTT
>PSFOR002-13|BC-PASSIFOR0002|Coxelus pictus|COI-5P
GACCTTATATTTTATTTTTGGGGCCTGATCAGGCATACTTGGCACCTCTTTAAGCCTTCTTATTCGCGCAGAATTAGGCAATCCCGGATCTCTTATTGGGGACGATCAAATTTATAACGTAATTGTAACCGCCCATGCTTTTGTTATAATTTTTTTTATAGTAATGCCTATCATAATCGGAGGCTTTGGTAATTGATTAGTCCCATTAATGCTTGGTGCCCCTGATATAGCATTTCCGCGAATAAATAATATAAGATTTTGATTATTGCCACCATCCTTAACATTGCTAGTAATAAGTAGAATTGTTGAAAATGGCGCAGGAACCGGATGAACGGTATACCCTCCCTTATCAGCAAATATTGCTCATAGAGGCCCATCTGTAGACCTTGCGATTTTTAGTCTCCACCTTGCAGGAATCTCATCAATTCTGGGAGCAGTAAATTTCATTACAACAGTAATTAATATGCGCCCTGTTGGTATAACTTTAGATCGAATACCACTGTTTGTTTGAGCTGTTGTAATTACGGCAATTTTACTACTTCTATCCCTCCCTGTTTTAGCAGGGGCTATTACTATACTCCTAACAGACCGTAACTTGAATACATCTTTCTTCGACCCAGCCGGAGGAGGAGACCCTATTCTATACCAACACCTATTC
>PSFOR330-13|BC-PNEF-PSFOR0302|Coxelus pictus|COI-5P
AACCTTATATTTTATTTTTGGGGCCTGATCAGGCATACTAGGCACCTCCTTAAGCCTTCTTATTCGCGCAGAATTAGGAAATCCCGGATCTCTTATTGGAGACGATCAAATTTATAACGTAATTGTAACCGCCCATGCTTTTATTATAATTTTTTTTATAGTAATGCCTATCATAATTGGAGGCTTTGGTAATTGATTAGTCCCATTAATGCTCGGTGCCCCTGATATAGCATTTCCGCGAATAAATAATATAAGATTTTGATTATTGCCACCATCCTTAACATTACTAGTAATAAGTAGAATTGTTGAAAATGGCGCAGGAACCGGATGAACGGTATACCCCCCCTTATCAGCAAACATTGCTCATAGAGGCCCATCTGTAGACCTTGCGATTTTTAGTCTCCACCTTGCAGGAATCTCATCAATTCTGGGAGCAGTAAATTTCATTACAACAGTAATTAACATACGCCCTGTTGGTATAACTTTAGATCGAATACCGCTGTTTGTTTGAGCTGTTGTAATTACAGCAATTTTACTACTTCTATCCCTCCCTGTTTTAGCAGGAGCTATTACTATGCTCCTAACGGACCGTAACTTAAATACATCTTTCTTCGACCCAGCCGGGGGAGGAGACCCTATTCTATACCAACACCTATTC
>PSFOR421-13|BC-PNEF-PSFOR0393|Cryphalus abietis|COI-5P
AACATTATATTTTATTTTTGGAGCATGATCTGGTATAGTAGGCACATCGATAAGATTAATTATTCGAACAGAACTAGGAACCCCTGGAAGATTAATTGGAGATGATCAAATTTATAATACTATTGTAACAGCACATGCTTTCATCATAATTTTCTTTATAGTTATACCAATCCTTATTGGAGGGTTTGGTAATTGATTGGTCCCTTTAATATTAGGGGCACCTGATATAGCTTTCCCTCGCTTAAATAATATAAGATTTTGATTACTCCCACCTTCATTAATTTTTCTAGTTATAAGAAGAATTATTAATAAAGGAGCAGGAACAGGTTGAACTGTTTACCCCCCATTAGCATCAAACATTGCTCACGAAGGAGCATCAGTAGATTTCGCAATTTTTAGTCTACATATAGCTGGGATTTCTTCAATTTTAGGAGCAATAAATTTTATCTCTACAATTATTAATATACACCCTAGGGGAATAAAGCCAGAACAGCTTTCATTATTTTCATGAGCTGTAAAAATCACAGCCATCCTTTTATTACTCTCTCTACCAGTTTTAGCTGGGGCAATCACAATATTACTTACAGACCGAAATATTAACACCTCATTTTTTGACCCTGCAGGCGGTGGGGATCCAATTCTTTATCAACACTTATTT
>PSFOR422-13|BC-PNEF-PSFOR0394|Cryphalus piceae|COI-5P
AACACTATATTTTATTTTTGGAGCATGATCTGGAATAGTAGGAACATCCATAAGATTAATTATTCGGACAGAATTAGGAACCCCCGGAAGATTAATTGGGGATGACCAAATTTATAATACTATTGTAACAGCACATGCTTTTATCATAATTTTCTTTATAGTCATACCCATTCTTATCGGGGGATTTGGTAATTGATTAGTCCCACTAATACTTGGAGCACCTGATATGGCCTTCCCCCGCTTAAATAATATAAGATTTTGATTACTCCCCCCTTCACTTATTTTCCTAATTATAAGAAGAGTAATTAATAAGGGTGCAGGAACAGGTTGAACTGTTTATCCACCACTAGCATCAAACATTGCCCATGAAGGAGCATCTGTAGATTTCGCAATTTTTAGTTTACATATAGCCGGAATTTCTTCAATCTTGGGAGCAATAAATTTTATCTCTACAATCATCAATATACATCCCAGAGGGATAAAACCAGAACAACTATCATTATTTTCATGAGCTGTAAAAATCACGGCTATCCTCCTCTTACTATCCCTCCCTGTTCTTGCCGGAGCAATCACCATACTGCTCACAGATCGAAACATTAACACCTCATTCTTTGATCCGGCAGGAGGGGGAGATCCTATTCTTTACCAACATTTATTC
>PSFOR286-13|BC-PNEF-PSFOR0258|Cryptarcha strigata|COI-5P
AACCTTATATTTCATTTTTGGAGCTTGGGCAGGAATAGTAGGGACTTCTTTAAGACTACTAATCCGATCGGAATTAGGAAACCCAGGATCATTGATTGGTGATGACCAAATTTATAATGTTATTGTCACAGCCCATGCTTTTATCATAATTTTTTTTATAGTAATGCCTTTCATAATTGGAGGTTTTGGAAACTGATTAGTGCCTTTAATGTTAGGAGCCCCCGACATAGCATTCCCTCGATTAAATAATATAAGATTTTGATTACTCCCTCCATCAATTTCTTTATTATTGATGAGTAGAATTGTCGAAAGAGGAGCAGGAACAGGATGAACAGTGTACCCTCCACTATCATCCAACATTGCTCATGGCGGTTCTTCTGTTGATTTAGCTATTTTTAGATTACACTTAGCAGGAATTAGATCTATTTTAGGTGCTGTAAATTTTATTACTACAGTTATTAACATACGACCAACAGGAATAACCTTTGACCGTATACCTCTTTTTGTTTGAGCAGTAGTAATTACTGCTGTACTACTTTTACTTTCACTCCCTGTTTTAGCCGGGGCTATTACAATACTTTTAACGGATCGAAATTTAAATACCTCATTTTTTGACCCTGCAGGAGGGGGAGACCCTATTTTATACCAACACTTATTT
>PSFOR1025-14|PASSIFOR-NM13-045|Cryptarcha strigata|COI-5P
CCTTATATTTCATTTTTTGGAGCTTTGGGCAGGAATAGTAGGGACTTCTTTAAGACTACTAATCCGATCGGAATTAGGAAACCCAGGATCATTGATTGGTGATGACCAAATTTATAATGTTATTGTCACAGCCCATGCTTTTATCATAATTTTTTTTATAGTAATGCCTTTCATAATTGGAGGTTTTGGAAACTGATTAGTGCCTTTAATGTTAGGAGCCCCCGACATAGCATTCCCTCGATTAAATAATATAAGATTTTGATTACTCCCTCCATCAATTTCTTTATTATTGATGAGTAGAATTGTCGAAAGAGGAGCAGGAACAGGATGAACAGTGTACCCTCCACTATCATCCAACATTGCTCATGGCGGTTCTTCTGTTGATTTAGCTATTTTTAGATTACACTTAGCAGGAATTAGATCTATTTTAGGTGCTGTAAATTTTATTACTACAGTTATTAACATACGACCAACAGGAATAACCTTTGACCGTATACCTCTTTTTGTTTGAGCAGTAGTAATTACTGCTGTACTACTTTTACTTTCACTCCCTGTTTTAGCCGGGGCTATTACAATACTTTTAACGGATCGAAATTTAAATACCTCATTTTTTGACCCTGCAGGAGGGGGAGACCCTATTTTATACCAACACTTATTT
>PSFOR287-13|BC-PNEF-PSFOR0259|Cryptarcha undata|COI-5P
-----------------------------------------------------------------------------------------------------------------------------------------------------------------------------------------------------------------------------------------------------------TAAGATTTTGATTATTACCCCCGTCAATTTCTTTGTTGTTAATAAGAAGAATTGTAGAAAGAGGTGTGGGAACAGGATGAACTGTTTATCCTCCTTTATCATCTAATATTGCTCACGGGGGATCTTCAGTTGATTTAGCTATTTTTAGTCTTCATTTAGCAGGAATTAGATCAATTCTTGGGGCTGTAAATTTTATTACTACAGTTATTAACATGCGACCTGCAGGAATAAGCTTTGACCGAATACCTTTGTTTGTATGAGCAGTAGTTATTACTGCTATTTTACTTCTCTTATCATTACCAGTTTTAGCAGGAGCTATTACT------------------------------------------------------------------------------------
>PSFOR195-13|BC-PNEF-PSFOR0167|Cteniopus sulphureus|COI-5P
AACACTTTATTTCATTTTCGGGGCCTGATCAGGAATAGTAGGAACTTCTCTTAGACTACTTATTCGAGCAGAGTTAGGAAACCCTGGTTCATTAATTGGAGATGATCAAATCTACAATGTAATTGTTACAGCTCACGCATTTGTAATAATTTTCTTCATAGTTATACCTATTATAATCGGAGGATTTGGAAACTGACTTGTACCGCTTATACTAGGGGCACCAGATATAGCATTCCCACGAATAAACAATATAAGATTCTGATTATTACCACCCTCGTTAACTCTTCTACTAATAAGAAGAATTGTAGAAAGTGGAGCAGGAACTGGATGAACAGTTTACCCCCCCTTGGCTTCTAATATTGCTCACGGAGGAGCATCTGTTGATTTAGCTATTTTCAGACTCCATTTGGCAGGAATTTCCTCAATTTTAGGAGCTGTAAATTTTATTACTACTGTAATTAATATACGACCAGAAGGAATATCATTTGACCGAATACCCTTATTTGTATGAGCTGTTGTAATTACAGCAGTTCTTCTACTATTGTCTCTACCAGTACTAGCAGGAGCCATCACTATACTATTAACAGATCGTAATATTAATACTTCATTCTTCGACCCCGCGGGGGGTGGAGATCCCATCTTATACCAACACCTATTC
>PSFOR196-13|BC-PNEF-PSFOR0168|Cteniopus sulphureus|COI-5P
AACACTTTATTTCATTTTCGGGGCCTGATCAGGAATAGTAGGAACTTCTCTTAGACTACTTATTCGAGCAGAGTTAGGAAACCCTGGTTCATTAATTGGAGATGATCAAATCTACAATGTAATTGTTACAGCTCACGCATTTGTAATAATTTTCTTCATAGTTATACCTATTATAATCGGAGGATTTGGAAACTGACTTGTACCGCTTATACTAGGGGCACCAGATATAGCATTCCCACGAATAAACAATATAAGATTCTGATTATTACCACCCTCGTTAACTCTTCTACTAATAAGAAGAATTGTAGAAAGTGGAGCAGGAACTGGATGAACAGTTTACCCCCCCTTGGCTTCTAATATTGCTCACGGAGGAGCATCTGTTGATTTAGCTATTTTCAGACTCCATTTGGCAGGAATTTCCTCAATTTTAGGAGCTGTAAATTTTATTACTACTGTAATTAATATACGACCAGAAGGAATATCATTTGACCGAATACCCTTATTTGTATGAGCTGTTGTAATTACAGCAGTTCTTCTACTATTGTCTCTACCAGTACTAGCAGGAGCCATCACTATACTATTAACAGATCGTAATATTAATACTTCATTCTTCGACCCCGCGGGGGGTGGAGATCCCATCTTATACCAACACCTATTC
>PSFOR289-13|BC-PNEF-PSFOR0261|Cychramus luteus|COI-5P
TACTTTATACTTCATTTTCGGAGCATGGTCAGGAATAGTAGGGACTTCCCTGAGAATCTTAATTCGGACTGAATTAGGAAATCCTGGCTCATTAATTGGGAATGACCAAATTTATAACGTAATTGTTACAGCTCATGCTTTCATCATAATTTTCTTCATGGTAATGCCTTTTATAATTGGTGGGTTTGGGAATTGACTTGTCCCACTAATATTAGGAGCCCCAGATATAGCATTTCCACGAATAAACAATATGAGATTTTGGCTTTTACCTCCTTCCCTTTCTCTCCTTCTAATAAGAAGAATCGTAGAAAGAGGGGCCGGGACAGGATGAACAGTCTATCCCCCCCTTTCGTCTAATATTGCCCATGGGGGATCTTCAGTTGATTTAGCTATTTTTAGACTTCACTTAGCTGGTATCTCTTCTATTTTAGGGGCTGTAAATTTCATTACAACTGTAATTAATATGCAACCGAATGGAATGTCATTCGACCGAATGCCTTTATTCGTATGAGCCGTAGTAATTACAGCAATTCTTCTTTTATTATCTCTACCTGTTTTAGCTGGAGCTATTACAATATTACTAACAGATCGAAATTTAAATACTACATTTTTTGACCCTTCAGGTGGTGG----------------------------
>PSFOR644-13|BC-PNEF-PSFOR0521|Cychramus variegatus|COI-5P
AACCTTATATTTTATTTTTGGTGCTTGATCAGGAATAGTGGGAACTTCTTTAAGAATACTAATTCGAACTGAATTAGGAAATCCCGGATCATTAATTGGAAATGACCAAATTTATAATGTTATTGTTACTGCCCATGCATTTATTATAATTTTTTTTATAGTTATACCCTTTATAATTGGAGGATTTGGAAACTGATTAGTTCCCCTAATACTAGGGGCCCCTGATATGGCCTTTCCTCGAATAAATAACATAAGATTCTGGCTTTTACCACCATCTTTATCCCTTCTTTTAATGAGAAGAATTGTTGAAAGAGGGGCAGGAACGGGGTGAACAGTATATCCACCCCTATCATCTAATATTGCTCACGGGGGTTCATCAGTAGACTTAGCTATTTTTAGTCTTCATTTAGCGGGAATTTCTTCTATTTTAGGAGCCGTAAATTTTATTACAACAGTAATTAATATACGACCTAAGGGAATAACTTTTGACCGAATACCCCTATTTGTTTGAGCAGTTATTATTACAGCTATTCTTCTTCTACTTTCTCTTCCTGTATTAGCAGGAGCTATCACAATATTACTTACTGACCGTAATTTAAATACTACATTTTTTGACCCCCTCGGGGGAGGGGATCCTATTTTATACCAACATTTATTT
>PSFOR716-13|BC-PNEF-PSFOR0593|Cyclorhipidion bodoanus|COI-5P
-------------------------------------------------------------------------------------------------------------------------------------------------------------------------------------------------------------------------------------------------------------------------------------TTATCACTTCTTTTAATAAGAAGAATAATTGATAAAGGAGCAGGAACAGGATGAACAGTATACCCACCATTAGCTGCTAATCTGGCCCATGAGGGAGCATCTGTAGACTTAGCAATTTTTAGTCTTCATATATCAGGAGCATCATCAATTCTTGGAGCAATTAACTTTATCTCAACCATTATTAATATACACCCCTCAGGAATAAAGCCTGAACAACTATCCCTATTTACATGAGCAGTAAAAATTACTGCTATTCTCCTTCTTCTTTCATTACCAGTTTTGGCGGGAGGTATTACTATATTACTAACAGACCGAAACATCAACACTTCATTTTTT---------------------------------------------
>PSFOR1055-14|PASSIFOR-NM13-075|Dalopius marginatus|COI-5P
TACCTTATACTTCATTTTTGGTGCTTGAGCAGGAATGCTAGGGACATCATTAAGATTACTAATTCGTGCTGAATTAGGTAACCCAGGATCATTAATTGGAAATGATCAAATTTATAACGTTATTGTAACAGCACATGCATTCATTATAATTTTCTTCATGGTTATACCCATCATAATTGGAGGATTCGGAAATTGATTAGTTCCATTAATATTAGGAGCCCCAGATATAGCCTTCCCTCGAATAAACAATATAAGATTCTGATTTTTACCACCTTCATTATCCCTTCTTCTAATAAGAAGAATTGTTGAAAATGGGGCAGGAACAGGTTGAACTGTTTATCCTCCACTATCCTCAAATATTGCACACAGAGGCTCGTCAGTTGATTTAGCAATTTTTAGTTTACACTTAGCAGGTATTTCATCAATTCTAGGAGCTGTAAATTTTATTTCGACAGTAATTAATATACGATCAACTGGAATTACCTTTGACCGAATACCTCTATTTGTTTGAGCAGTTGCAATTACTGCCCTACTTTTATTACTTTCACTACCAGTACTAGCTGGAGCTATTACTATACTATTAACAGACCGAAATCTGAATACATCATTTTTTGACCCAGCAGGTGGTGGAGATCCAATTCTTTATCAACATCTATTC
>PSFOR747-13|BC-PNEF-PSFOR0624|Danosoma fasciata|COI-5P
AACTCTATATTTTTTATTTGGAGCATGAGCTGGTATACTAGGAACTTCCCTGAGCCTACTTATCCGGGCAGAACTAGGAAACCCCGGCTCATTAATCGGTAATGACCAAATTTACAATGTAGTTGTAACCGCTCATGCATTTGTAATAATTTTCTTCATAGTAATACCAGTTATAATTGGAGGATTCGGAAATTGACTTGTTCCTCTTATACTAGGTGCCCCTGATATAGCATTCCCTCGAATAAACAATATAAGATTTTGACTTCTTCCTCCCTCATTATCACTTCTATTAATAAGAAGAATTGTTGAAAACGGAGCAGGTACTGGATGAACAGTATACCCTCCCCTATCAGCAAATATTGCCCACAGAGGATCATCCGTAGACTTAGCAATTTTCAGTCTTCATCTAGCAGGTATCTCATCAATTCTAGGAGCTGTAAATTTTATTTCAACCGTAATTAACATACGATCAACAGGGATAACTTTCGACCGTATACCTCTATTTGTATGAGCAGTTGCAATTACAGCTCTTCTACTTCTTCTTTCTCTTCCAGTATTAGCAGGAGCTATTACAATATTATTGACAGATCGAAATCTTAATACTACATTCTTTGATCCAGCAGGAGGGGGAGACCCTATTTTATACCAACATTTATTC
>PSFOR969-14|BC-PSFOR-JD0123|Danosoma fasciata|COI-5P
AACTCTATATTTTTTATTTGGAGCATGAGCTGGTATACTAGGAACTTCCCTGAGCCTACTTATCCGGGCAGAACTAGGAAACCCCGGCTCATTAATCGGTAATGACCAAATTTACAATGTAGTTGTAACCGCTCATGCATTTGTAATAATTTTCTTCATAGTAATACCAGTTATAATTGGAGGATTCGGAAATTGACTTGTTCCTCTTATACTAGGTGCCCCTGATATAGCATTCCCTCGAATAAACAATATAAGATTTTGACTTCTTCCTCCCTCATTATCACTTCTATTAATAAGAAGAATTGTTGAAAACGGAGCAGGTACTGGATGAACAGTATACCCTCCCCTATCAGCAAATATTGCCCACAGAGGATCATCCGTAGACTTAGCAATTTTCAGTCTTCATCTAGCAGGTATCTCATCAATTCTAGGAGCTGTAAATTTTATTTCAACCGTAATTAACATACGATCAACAGGGATAACTTTCGACCGTATACCTCTATTTGTATGAGCAGTTGCAATTACAGCTCTTCTACTTCTTCTTTCTCTTCCAGTATTAGCAGGAGCTATTACAATATTATTGACAGATCGAAATCTTAATACTACATTCTTTGATCCAGCAGGAGGGGGAGACCCTATTTTATACCAACATTTATTC
>PSFOR049-13|BC-PNEF-PSFOR0021|Deilus fugax|COI-5P
-------------------------------------------------------------------------------------------------------------------------------------------------------------------------------------------------------------TTAATACTAGGGGCACCAGACATAGCATTTCCTCGTATGAACAATATAAGATTCTGGTTACTTCCTCCATCTCTTACCTTGTTAATTTTAAGGAGAATTGTAGAAAGTGGGGCAGGAACCGGATGAACTGTTTATCCCCCGCTTTCCTCAAATATTGCACATGGGGGATCATCGGTTGACTTGGCAATCTTTAGACTTCACTTAGCAGGAATTTCATCAATTCTTGGAGCAGTAAATTTTATTTCTACAGTAATTAACATACGACCTATACAAATAAATCCTGATCAAATACCCCTTTTTGTTTGAGCAGTAGTAATTACTGCTATTTTGTTATTATTATCATTACCAGTACTGGCAGGAGCTATTACTATATTACTAACTGATCGTAATATTAATACATCATTCTTTGATCCCGCGGGAGGTGGTGACCCAATTCTCTATCAACACTTATTT
>PSFOR748-13|BC-PNEF-PSFOR0625|Denticollis linearis|COI-5P
AACACTTTATTTTCTTTTTGGAGCCTGAGCTGGAATACTTGGAACTTCTTTAAGACTATTAATTCGAGCCGAATTAGGAAATCCTGGTTCTCTAATCGGTAATGATCAAATCTATAATGTTATTGTTACAGCACATGCTTTTATTATAATTTTCTTCATAGTTATACCAATTATAATTGGGGGATTTGGAAATTGATTAGTCCCACTAATATTGGGAGCTCCTGACATAGCTTTCCCACGAATAAACAACATAAGATTCTGATTTTTACCCCCCTCTCTTTCTTTGTTACTAATAAGAAGAATTGTAGAAAATGGGGCAGGAACAGGTTGAACTGTTTACCCCCCTCTTTCAGCAAACATTGCTCATAGAGGATCATCTGTAGATTTAGCTATTTTTAGCCTTCATTTAGCTGGAATCTCTTCAATTTTAGGAGCAGTAAATTTTATTTCAACAGTAATTAATATACGATCAACCGGAATTACTTTTGATCGTATACCTCTGTTTGTATGGGCAGTTGTAATTACAGCTTTACTATTACTACTGTCACTACCAGTATTAGCAGGAGCTATTACTATATTATTAACAGACCGAAATTTAAATACATCATTCTTCGACCCAGCAGGAGGCGGAGACCCAATTCTTTATCAACATTTATTT
>PSFOR979-14|BC-PSFOR-JD0133|Denticollis linearis|COI-5P
AACACTTTATTTTCTTTTTGGAGCCTGAGCTGGAATACTTGGAACTTCTTTAAGACTATTAATTCGAGCCGAATTAGGAAATCCTGGTTCTCTAATCGGTAATGATCAAATCTATAATGTTATTGTTACAGCACATGCTTTTATTATAATTTTCTTCATAGTTATACCAATTATAATTGGGGGATTTGGAAATTGATTAGTCCCACTAATATTGGGAGCTCCTGACATAGCTTTCCCACGAATAAACAACATAAGATTCTGATTTTTACCCCCCTCTCTTTCTTTGTTACTAATAAGAAGAATTGTAGAAAATGGGGCAGGAACAGGTTGAACTGTTTACCCCCCTCTTTCAGCAAACATTGCTCATAGAGGATCATCTGTAGATTTAGCTATTTTTAGCCTTCATTTAGCTGGAATCTCTTCAATTTTAGGAGCAGTAAATTTTATTTCAACAGTAATTAATATACGATCAACCGGAATTACTTTTGATCGTATACCTCTGTTTGTATGGGCAGTTGTAATTACAGCTTTACTATTACTACTGTCACTACCAGTATTAGCAGGAGCTATTACTATATTATTAACAGACCGAAATTTAAATACATCATTCTTCGACCCAGCAGGAGGCGGAGACCCAATTCTTTATCAACATTTATTT
>PSFOR865-14|BC-PASSIFOR0083|Denticollis linearis|COI-5P
-------------------------TGAGCTGGAATAACTGGAACTTCTTTAAGATTATTAATTCGAGCCGAATTAGGAAATCCTGGTTCTCTAATCGGTAATGATCAAATCTATAATGTTATTGTTACAGCACATGCTTTTATTATAATTTTCTTCATAGTTATACCAATTATAATTGGGGGATTTGGAAATTGATTAGTCCCACTAATATTAGGAGCTCCTGACATAGCTTTCCCACGAATAAACAACATAAGATTCTGATTTTTACCTCCCTCTCTTTCTTTGTTACTAATAAGAAGAATTGTAGAAAATGGAGCAGGAACAGGTTGAACTGTTTACCCCCCCCTTTCAGCAAACATTGCTCATAGAGGGTCATCTGTAGATTTAGCTATTTTTAGCCTTCATTTAGCTGGAATCTCTTCAATTTTAGGAGCTGTAAATTTTATTTCAACAGTAATTAATATACGATCAACCGGAATTACTTTTGATCGTATACCCTTATTTGTATGAGCGGTTGTAATTACAGCTTTAC-----------------------------------------------------------------------------------------------------------------------------
>PSFOR332-13|BC-PNEF-PSFOR0304|Denticollis linearis|COI-5P
-----------------------------------------------------------------------------------------------------------------------------------------------------------------------------------------------------------------------------------------------------------TAAGATTCTGATTTTTACCCCCCTCTCTTTCTTTGTTACTAATAAGAAGAATTGTAGAAAATGGGGCAGGAACAGGTTGAACTGTTTACCCCCCTCTTTCAGCAAACATTGCTCATAGAGGATCATCTGTAGATTTAGCTATTTTTAGCCTTCATTTAGCTGGAATCTCTTCAATTTTAGGAGCAGTAAATTTTATTTCAACAGTAATTAATATACGATCAACCGGAATTACTTTTGATCGTATACCTCTGTTTGTATGGGCAGTTGTAATTACAGCTTTACTATTACTACTGTCACTACCAGTATTAGCAGGAGCTATTACTATATTATTAACAGACCGAAATTTAAATACATCATTCTTCGACCCAGCAGG----------------------------------
>PSFOR870-14|BC-PASSIFOR0088|Denticollis rubens|COI-5P
AACACTTTATTTTCTTTTTGGAGCCTGGGCTGGAATACTCGGAACTTCATTAAGACTTTTAATTCGAGCTGAATTAGGAAATCCTGGCTCTCTAATTGGAAATGATCAAATTTATAATGTGATTGTTACAGCTCATGCCTTTATTATAATTTTCTTTATAGTTATACCAATCATAATTGGGGGATTCGGAAATTGACTTGTACCCCTCATATTAGGAGCGCCTGATATAGCTTTTCCACGAATAAACAATATAAGATTTTGATTTTTACCACCATCTCTTTCTTTGTTATTAATAAGAAGAATTGTAGAAAATGGAGCAGGAACAGGATGAACAGTATACCCACCCCTTTCAGCAAATATTGCCCATAGAGGTTCATCTGTTGATCTAGCTATTTTCAGATTACATTTAGCAGGAATTTCATCAATTTTAGGAGCAGTAAATTTTATTTCAACAGTAATTAATATACGATCAACTGGAATTACATTTGATCGTATACCATTATTTGTATGAGCTGTGGTAATTACAGCTTTACTTCTTCTTCTTTCTCTTCCAGTTTTAGCAGGAGCTATTACAATATTATTAACAGATCGAAATCTAAATACATCCTTCTTTGATCCAGCTGGTGGTGGTGACCCAATTCTTTACCAACACTTATTT
>PSFOR749-13|BC-PNEF-PSFOR0626|Denticollis rubens|COI-5P
AACACTTTATTTTCTTTTTGGAGCCTGGGCTGGAATACTCGGAACTTCATTAAGACTTTTAATTCGAGCTGAATTAGGAAATCCTGGCTCTCTAATTGGAAATGATCAAATTTATAATGTGATTGTTACAGCTCATGCCTTTATTATAATTTTCTTTATAGTTATACCAATCATAATTGGGGGATTCGGAAATTGACTTGTACCCCTCATATTAGGAGCGCCTGATATAGCTTTTCCACGAATAAACAATATAAGATTTTGATTTTTACCACCATCTCTTTCTTTGTTATTAATAAGAAGAATTGTAGAAAATGGAGCAGGAACAGGATGAACAGTATACCCACCCCTTTCAGCAAATATTGCCCATAGAGGTTCATCTGTTGATCTAGCTATTTTCAGATTACATTTAGCAGGAATTTCATCAATTTTAGGAGCAGTAAATTTTATTTCAACAGTAATTAATATACGATCAACTGGAATTACATTTGATCGTATACCATTATTTGTATGAGCTGTGGTAATTACAGCTTTACTTCTTCTTCTTTCTCTTCCAGTTTTAGCAGGAGCTATTACAATATTATTAACAGATCGAAATCTAAATACATCCTTCTTTGATCCAGCTGGTGGTGGTGACCCAATTCTTTACCAACACTTATTT
>PSFOR340-13|BC-PNEF-PSFOR0312|Denticollis rubens|COI-5P
AACACTTTATTTTCTTTTTGGAGCCTGGGCTGGAATACTCGGAACTTCATTAAGACTTTTAATTCGAGCTGAATTAGGAAATCCTGGCTCTCTAATTGGAAATGATCAAATTTATAATGTGATTGTTACAGCTCATGCCTTTATTATAATTTTCTTTATAGTTATACCAATCATAATTGGGGGATTCGGAAATTGACTTGTACCCCTCATATTAGGAGCGCCTGATATAGCTTTTCCACGAATAAACAATATAAGATTTTGATTTTTACCACCATCTCTTTCTTTGTTATTAATAAGAAGAATTGTAGAAAATGGAGCAGGAACAGGATGAACAGTATACCCACCCCTTTCAGCAAATATTGCCCATAGAGGTTCATCTGTTGATCTAGCTATTTTCAGATTACATTTAGCAGGAATTTCATCAATTTTAGGAGCAGTAAATTTTATTTCAACAGTAATTAATATACGATCAACTGGAATTACATTTGATCGTATACCATTATTTGTATGAGCTGTGGTAATTACAGCTTTACTTCTTCTTCTTTCTCTTCCAGTTTTAGCAGGAGCTATTACAATATTATTAACAGATCGAAATCTAAATACATCCTTCTTTGATCCAGCTGGTGGTGGTGACCCAATTCTTTACCAACACTTATTT
>PSFOR750-13|BC-PNEF-PSFOR0627|Diacanthous undulatus|COI-5P
AACTCTATACTTCCTATTTGGAGCATGAGCTGGAATACTAGGAACATCACTAAGATTACTAATTCGTGCCGAACTAGGAAACCCCGGATCACTAATCGGGAATGATCAAATTTATAACGTAATTGTAACAGCCCATGCCTTTATCATAATTTTCTTCATAGTAATACCAATTATAATTGGAGGATTCGGAAATTGACTAGTACCTCTAATACTAGGAGCACCAGATATGGCCTTTCCACGAATAAATAACATAAGATTTT--------------------------------------------------------------------------------------------------------------------------------------------------------------------------------------------------------------------------------------------------------------------------------------------------------------------------------------------------------------------------------------------------------------
>PSFOR198-13|BC-PNEF-PSFOR0170|Diaperis boleti|COI-5P
GACTCTTTACTTCATCTTTGGAGCATGATCAGGAATAGTGGGAACATCCCTTAGACTATTAATTCGTGCAGAACTTGGAAATCCTGGATCCTTAATTGGAGACGACCAAATTTATAATGTAATTGTAACTGCCCATGCATTTATTATAATTTTCTTTATAGTTATACCAATTATAATTGGAGGCTTCGGAAACTGACTAGTTCCCTTAATATTAGGAGCCCCAGATATAGCATTTCCTCGAATAAACAACATAAGATTTTGACTTCTCCCACCCTCATTAACTTTACTATTAATAAGAAGAATCGTAGAAAATGGAGCAGGAACAGGATGAACAGTTTACCCCCCACTCTCGTCCAATATTGCTCATGGAGGTTCTTCTGTAGATTTAGCTATTTTTAGACTTCACTTAGCAGGAATCTCGTCAATTCTAGGAGCAGTAAATTTCATTACCACAATCATTAACATACGACCACAAGGAATAACCTTTGATCGAATACCACTATTTGTATGAGCAGTAATCATTACTGCTGTTCTTCTACTTTTATCACTTCCAGTACTAGCTGGTGCCATTACTATATTACTAACAGACCGAAATATTAATACATCCTTCTTTGATCCTGCAGGAGGAGGAGATCCTATTCTTTATCAACACTTATTT
>PSFOR1034-14|PASSIFOR-NM13-054|Diaperis boleti|COI-5P
GACTCTTTACTTCATCTTTGGAGCATGATCAGGAATAGTGGGAACATCCCTTAGACTATTAATTCGTGCAGAACTTGGAAATCCTGGATCCTTAATTGGAGACGACCAAATTTATAATGTAATTGTAACTGCCCATGCATTTATTATAATTTTCTTTATAGTTATACCAATTATAATTGGAGGCTTCGGAAACTGACTAGTTCCCTTAATATTAGGAGCCCCAGATATAGCATTTCCTCGAATAAACAACATAAGATTTTGACTTCTCCCACCCTCATTAACTTTACTATTAATAAGAAGAATCGTAGAAAATGGAGCAGGAACAGGATGAACAGTTTACCCCCCACTCTCGTCCAATATTGCTCATGGAGGTTCTTCTGTAGATTTAGCTATTTTTAGACTTCATTTAGCAGGAATCTCGTCAATTCTAGGAGCAGTAAATTTCATTACCACAATCATTAACATACGACCACAAGGAATAACCTTTGATCGAATACCACTATTTGTATGAGCAGTAATCATTACTGCTGTTCTTCTACTTTTATCACTTCCAGTACTAGCTGGTGCCATTACTATATTACTAACAGACCGAAATATTAATACATCCTTCTTTGATCCTGCAGGAGGAGGAGATCCTATTCTTTATCAACACTTATTT
>PSFOR868-14|BC-PASSIFOR0086|Dictyopterus aurora|COI-5P
AACTTTATATTTTATTCTGGGAGCTTGGGCAGGTATAATAGGAACTGCCTTAAGTTTATTAATCCGAGCAGAATTAGGAACCCCCGGAACATTGATTGGAAATGATCAAATTTATAATGTTATTGTAACCGCCCATGCATTCATTATAATTTTCTTTATAGTAATACCAATAATAATTGGAGGATTTGGAAATTGATTAATTCCTCTAATACTTGGAGCCCCTGACATAGCCTACCCACGAATAAACAATATAAGATATTGGCTCCTACCCCCTGCCCTATCTTTATTAACTATAGGAAGAATGATCGAATCTGGTGCAGGAACAGGTTGAACAGTTTACCCCCCCCTAGCCTCTAATATTGCCCATAGAGGAGGATCTGTTGACTTAACAATCTTTAGACTTCATTTAGCAGGAATCTCTTCTATTTTAGGAGCAGTTAATTTTATCTCCACTATTATCAATATAAAATCTAAAGAAATAACATTTGAACAAATACCCCTATTTGTTTGAGCAGTCGGAATCACAGCCTTACTTTTACTTCTATCCCTTCCTGTTTTGGCAGGAGCCATCACGATATTATTAACTGATCGTAATTTAAACACATCTTTTTTTGATCCCATAGGAGGGGGAGACCCTATTCTTTACCAACACTTATTT
>PSFOR050-13|BC-PNEF-PSFOR0022|Dinoptera collaris|COI-5P
AATATTATATTTTATTTTTGGGGCTTGAGCAGGAATAGTAGGAACTTCATTAAGTTTATTAATTCGATCAGAATTAGGAAATCCTGGATCTTTAATTGGTAATGATCAAATTTACAATGTTATTGTTACAGCTCATGCTTTTATTATAATTTTTTTTATAGTTATACCTATTATAATTGGTGGATTTGGAAATTGATTAGTTCCTTTAATATTAGGGGCTCCTGATATAGCTTTTCCACGATTAAATAATATAAGATTTTGATTATTACCCCCATCTTTAACTTTATTAATTATAAGAAGAGCTGTAGAAAGAGGAGCTGGAACAGGATGAACAGTTTATCCACCACTTTCTTCTAATATTGCTCATGGAGGTTCTTCAGTTGATTTAGCTATTTTTAGTCTTCATTTAGCTGGAATTTCCTCAATTTTAGGAGCTATTAATTTTATTACAACAGTAATTAATATACGTCCTAAAGGTATAACCTTTGACCGAATACCTCTTTTTGTTTGAGCTGTTGTTATTACAGCAATTTTATTACTTTTATCTTTACCTGTTTTAGCTGGAGCTATTACTATATTATTAACTGATCGAAATTTAAATACATCATTTTTTGATCCAGCCGGAGGAGGTGATCCTATTTTATATCAACATTTATTT
>PSFOR1017-14|PASSIFOR-NM13-037|Dircaea australis|COI-5P
AACTTTATACTTAATTTTTGGTGCTTGAGCTGGTATAGTAGGAACATCTCTAAGATTATTGATTCGTTCAGAATTAGGAAATCCAGGATCTTTAATTGGAGATGATCAAATTTATAATGTTATTGTCACTGCTCATGCCTTTATTATAATTTTTTTTATAGTTATACCTATTATAATAGGGGGATTTGGAAATTGAATAGTACCTTTAATGTTAGGTGCCCCAGATATAGCCTTTCCCCGTATAAATAATATAAGATTTTGGCTACTACCCCCATCCTTAACTTTACTTATCATAAGAAGAATCGTAGAAAATGGAGCTGGCACTGGTTGAACAGTTTATCCACCTTTATCATCTAATATTGCTCATGCTGGAGCTTCTGTTGATTTAGCAATTTTTAGTCTTCACTTAGCTGGAGTTTCTTCAATTTTAGGGGCAGCAAATTTTATTACTACTATTATTAATATACGACCCTTAGGAATAACATTTGATCGAATACCTCTTTTTGTTTGATCAGTAGCTATTACCGCAGTATTACTCCTTTTATCATTACCAGTATTAGCTGGTGCTATTACCATACTCTTAACTGATCGAAATTTAAATACATCTTTTTTTGATCCAGCAGGAGGAGGAGACCCTATTTTATATCAACATCTCTTT
>PSFOR493-13|BC-PASSIFOR0066|Dissoleucas niveirostris|COI-5P
-----------------------------------------------------------------------------------------------------------------------------------------------------------------------------------------------------------------------------------------------------------TAAGATTCTGACTTTTACCCCCTTCACTCACTTTATTAATAATAAGAAGTGTAGTAGAAAGAGGGGCTGGGACAGGTTGAACTGTTTATCCCCCCCTTTCATCAAATATTGCTCATGGAGGAGCTTCTGTTGATTTAGCAATTTTTAGTTTACATTTAGCAGGAGTTTCGTCAATTTTAGGAGCTGTAAATTTTATTACAACAGTTGTTAATATACGCCCAGTAGGGATAACTCTCGACCGAACCCCTTTATTCGTTTGAGCAGTTAGAATCACCGCCCTTCTTCTATTACTTTCTCTCCCTGTATTAGCAGGAGCAATTACAATACTTCTTACTGATCGTAATTTAAATACATCATTTTTTGACCCTGCTGGAGGTGGAG--------------------------
>PSFOR179-13|BC-PNEF-PSFOR0151|Dissoleucas niveirostris|COI-5P
AACATTATATTTTATTTTCGGAGCTTGAGCTGGAATAATAGGTATATCCCTTAGCCTATTAATCCGGACAGAGCTCGGAAATCCTGGGTCATTAATTGGAGATGACCAAATTTATAACGTTATTGTAACTGCTCATGCTTTTATTATAATTTTTTTTATAGTTATACCAACTATAATTGGCGGATTCGGTAATTGACTAGTACCCTTAATACTAGGAGCACCCGATATAGCCTTCCCTCGAATAAATAATATAAGATTCTGACTTTTACCCCCTTCACTCACTTTATTAATAATAAGAAGTGTAGTAGAAAGAGGGGCTGGGACAGGTTGAACTGTTTATCCCCCCCTTTCATCAAATATTGCTCATGGAGGAGCTTCTGTTGATTTAGCAATTTTTAGTTTACATTTAGCAGGAGTTTCGTCAATTTTAGGAGCTGTAAATTTTATTACAACAGTTGTTAATATACGCCCAGTAGGGATAACTCTCGACCGAACCCCTTTATTCGTTTGAGCAGTTAGAATCACCGCCCTTCTTCTATTACTTTCTCTCCCTGTATTAGCAGGAGCAATTACTATACTTCTTACTGATCGTAATTTAAATACATCATTTTTTGACCCTGCTGGGGGTGGAGATCCCATTCTTTATCAA---------
>PSFOR256-13|BC-PNEF-PSFOR0228|Dorcus parallelipipedus|COI-5P
AACACTTTACTTTCTTTTAGGAAGCTGATCAGGAATAGTAGGAACTTCCCTGAGAATCCTTATTCGAGCTGAATTAGGAAATCCTGGATCCCTTATTGGTGATGATCAAATTTATAATGTAATTGTAACTGCCCATGCATTCATTATAATTTTCTTCATAGTGATACCAATCATGATTGGGGGATTTGGAAACTGATTAGTTCCCCTAATATTGGGAGCACCTGATATAGCATTTCCACGAATAAACAACATAAGATTTTGACTTCTACCCCCTTCCCTCACATTCCTTCTAATGAGAAGAATAGTTGAAAACGGAGCAGGAACAGGATGAACTGTATATCCACCTTTATCCTCTAATATTGCCCATAGAGGAGCTTCAGTTGATTTAGCTATCTTCAGACTCCATTTAGCAGGAATTTCTTCCATTCTAGGAGCCGTTAATTTCATCACCACTGTAATTAATATACGAGCAACTGGAATTACATTTGATCGAATACCTCTATTTGTGTGAGCTGTAGTATTAACTGCCCTTTTACTACTCCTATCTCTCCCTGTACTTGCAGGTGCAATCACAATGCTTCTTACAGATCGAAACATCAATACAACCTTCTTCGACCCAGCTGGTGGTGGGGATCCTATTTTATACCAACACTTATTC
>PSFOR1018-14|PASSIFOR-NM13-038|Dorcus parallelipipedus|COI-5P
-------------------------TGATCAGGAATAGTAGGAACTTCCCTGAGAATCCTTATTCGAGCTGAATTAGGAAATCCTGGATCCCTTATTGGTGATGATCAAATTTATAATGTAATTGTAACTGCCCATGCATTCATTATAATTTTCTTCATAGTGATACCAATCATGATTGGGGGATTTGGAAACTGATTAGTTCCCCTAATATTGGGAGCACCTGATATAGCATTTCCACGAATAAACAACATAAGATTTTGACTTCTACCCCCTTCCCTCACATTCCTTCTAATGAGAAGAATAGTTGAAAACGGAGCAGGAACAGGATGAACTGTATATCCACCTTTATCCTCTAATATTGCCCATAGAGGAGCTTCAGTTGATTTAGCTATCTTCAGACTCCATTTAGCAGGAATTTCTTCCATTCTAGGAGCCGTTAATTTCATCACCACTGTAATTAATATACGAGCAACTGGAATTACATTTGATCGAATACCTCTATTTGTGTGAGCTGTAGTATTAACTGCCCTTTTACTACTCCTATCTCTCCCTGTACTTGCAGGTGCAATCACAATGCTTCTTACAGATCGAAACATCAATACAACCTTCTTCGACCCAGCTGGTGGTGGGGATCCTATTTTATACCAACACTTATTC
>PSFOR751-13|BC-PNEF-PSFOR0628|Drapetes mordelloides|COI-5P
-----------------------------------------------------------------------------------------------------------------------------------------------------------------------------------------------------------------------------------------------------------TAAGATTTTGACTGCNGCCCCCATCAATCTCTTTATTATTAATAAGAAGAATAGTAGAAAATGGAGCAGGAACTGGATGAACAGTTTATCCCCCTCTATCATCAAATATTGCCCATAGAGGTTCCTCAGTTGATTTAGCAATTTTTAGTCTTCATCTAGCTGGAATTTCTTCCATTNTAGGAGCTGTTAATTTCATTTCTACCGTAATTAACATACGATCTCCTGGAATTTCTTTTGACCAAATACCTCTTTTTGTATGAGCAGTAGTAATTACAGCTCTTCTCCTCCTACTTTCACTTCCTGTTCTGGCTGGAGCCATTACAATACTGTTAAC-------------------------------------------------------------------------
>PSFOR425-13|BC-PNEF-PSFOR0397|Dryocoetes autographus|COI-5P
AACTTTATATTTTATTTTTGGAGTATGGTCTGGGATAGTAGGAACCTCCCTTAGAGTTTTAATTCGGACAGAATTAGGAACCCCAGGAAGATTAATTGGAGATGATCAAATTTTTAACACTATTGTTACAGCCCACGCTTTTATTATAATTTTTTTTATAGTCATACCAATTTTAATTGGAGGGTTTGGAAATTGATTAGTTCCACTTATATTAGGGGCCCCAGATATAGCGTTTCCTCGATTAAATAATATAAGATTTTGACTTCTTCCACCTAGATTATCCCTTCTATTAATAAGAAGAATTATTGACAAAGGAGCAGGAACCGGATGAACTGTTTACCCACCACTAGCAAGAAATATTGCCCACGAAGGAGCATCTGTTGATTTAGCTATTTTTAGTCTTCACATAACAGGTGTTTCATCAATCTTAGGGGCCATCAACTTTATCTCAACAATTATTAATATACATCCTGCAGGAGTAAAACCCGAACAACTTTCCCTTTTTACTTGATCAGTTAAAATTACAGCAATTCTACTTCTTCTATCTCTACCTGTTCTAGCAGGAGGAATCACTATATTATTGACAGATCGAAATATTAACACATCATTTTTTGACCCAGCCGGAGGAGGGGATCCAATTCTATACCAGCATCTATTT
>PSFOR405-13|BC-PNEF-PSFOR0377|Dryocoetes villosus|COI-5P
AACTTTATACTTTATTTTTGGAACTTGATCAGGAATAGTAGGAACCTCTTTAAGAGTTCTAATTCGAACAGAATTAGGAACCCCTGGTAGATTAATTGGAGATGATCAAATTTTTAATACCATCGTAACAGCCCACGCCTTTATCATAATTTTCTTTATAGTTATACCAATTCTAATTGGAGGGTTTGGAAATTGACTAGTACCTCTAATATTAGGAGCCCCAGATATAGCATTTCCACGCTTAAATAATATAAGATTCTGACTTTTACCTCCATCATTAACCCTTCTTCTAATAAGAAGAATTATAGATAAAGGTGCAGGAACAGGTTGAACAGTTTACCCACCCCTAGCAAGAAATATTGCCCATAGAGGAACATCAGTAGATCTAGCCATTTTTAGTCTTCATATAGCAGGAATTTCCTCTATCCTCGGGGCAGTTAACTTTATTTCAACAATTATCAACATACACCCAGCAGGAATAAAGCCTGAACAACTTTCTTTATTTACTTGAGCTGTAAAAATTACAGCAATTCTTCTTTTATTATCCCTCCCAGTTTTAGCGGGAGGAATTACTATACTATTAACTGATCGAAATATCAATACCTCATTTTTTGATCCTGCAGGAGGAGGAGATCCAATTCTATATCAACACTTATTC
>PSFOR411-13|BC-PNEF-PSFOR0383|Dryocoetes villosus|COI-5P
--CTTTATACTTTATTTTTGGAACTTGATCAGGAATAGTAGGAACCTCTTTAAGAATTCTAATTCGAACAGAATTAGGAACCCCTGGTAGATTAATTGGAGATGATCAAATTTTTAATACCATCGTAACAGCCCACGCCTTTATCATAATTTTCTTTATAGTTATACCAATTCTAATTGGAGGGTTTGGAAATTGACTAGTACCTCTAATACTAGGAGCCCCAGATATAGCATTTCCACGCTTAAATAATATAAGATTCTGACTTCTACCTCCATCATTAACCCTTCTTCTAATAAGAAGAATTATAGATAAAGGTGCAGGAACAGGTTGAACAGTTTATCCACCCCTAGCAAGAAATATTGCCCATGAAGGAGCATCAGTAGATCTAGCCATTTTTAGTCTTCATATAGCAGGAATTTCCTCTATCCTCGGGGCAGTTAACTTTATTTCAACAATTAACAACATACACCCAGCAGGAATAAAGCCTGAACAACTTTCTTTATTTACTTGAGCTGTAAAAATTACAGCAATTCTTCTTTTATTATCCCTCCCAGTTCTAGCAGGAGGAATTACTATACTATTAACTGATCGAAATATCAATACCTCATTTTTTGATCCTGCAGGAGGAGGGGATCCAATTCTATATCAACACTTATTC
>PSFOR861-14|BC-PASSIFOR0079|Endomychus coccineus|COI-5P
AACTTTATATTTTATATTTGGTTTATGAGCTGGTATATTAGGAACTTCCTTAAGAATAATAATTCGTTTAGAATTAGGTAATACAATACAATTAATTGGAAATGATCAAATTTTTAATGTAATTGTTACTGCTCATGCTTTTGTAATAATTTTTTTTATAGTTATACCAATTATAATTGGAGGATTTGGAAACTGGTTAGTGCCTTTAATATTAGGAGCTCCAGATATGGCTTTTCCTCGAATAAATAATATAAGATTTTGACTTCTTCCCCCTTCTTTAACATTATTAATTTTAAGAAGAATTAGAGAAAGAGGAGTAGGAACAGGTTGAACCGTCTACCCTCCATTATCATCAAATATTGCCCACAGAGGTTCATCTGTAGATTTAGCAATTTTTAGATTACATTTAGCTGGAATTTCTTCAATTTTAGGTGCAATTAATTTTATTACAACAATCATTAATATACGACCTACTGGAATAACTTTAGAAAAAATACCTTTATTTGTCTGATCTGTTTTTATTACTGCTATCCTTTTACTTCTTTCATTACCAGTCTTAGCTGGTGCAATTACTATACTTTTAACAGATCGAAATTTAAATACTTCTTTTTTTGACCCTGCAGGAGGTGGAGATCCTATTTTATATCAACATCTCTTT
>PSFOR1063-14|PASSIFOR-NM13-083|Endomychus coccineus|COI-5P
--------------ATTTTGGTTTATGAGCTGGTATATTAGGAACTTCCTTAAGAATAATAATTCGTTTAGAATTAGGTAATACAATACAATTAATTGGAAATGATCAAATTTTTAATGTAATTGTTACTGCTCATGCTTTTGTAATAATTTTTTTTATAGTTATACCAATTATAATTGGAGGATTTGGAAACTGGTTAGTGCCTTTAATATTAGGAGCTCCAGATATGGCTTTTCCTCGAATAAATAATATAAGATTTTGACTTCTTCCCCCTTCTTTAACATTATTAATTTTAAGAAGAATTAGAGAAAGAGGAGTAGGAACAGGTTGAACCGTCTACCCTCCATTATCATCAAATATTGCCCACAGAGGTTCATCTGTAGATTTAGCAATTTTTAGATTACATTTAGCTGGAATTTCTTCAATTTTAGGTGCAATTAATTTTATTACAACAATCATTAATATACGACCTACTGGAATAACTTTAGAAAAAATACCTTTATTTGTCTGATCTGTTTTTATTACTGCTATCCTTTTACTTCTTTCATTACCAGTCTTAGCTGGTGCAATTACTATACTTTTAACAGATCGAAATTTAAATACTTCTTTTTTTGATCCTGCAGGAGGTGGAGATCCTATTTTATATCAACATCTCTTT
>PSFOR329-13|BC-PNEF-PSFOR0301|Endophloeus markovichianus|COI-5P
AACTCTTTATTTCATTTTCGGGTCCTGAGCAGGAATAGTAGGTACATCACTTAGTCTACTAATTCGAACAGAGCTCGGAAATCCTGGTTCCCTAATTGGTGACGACCAAATTTATAATGTAATCGTTACAGCTCATGCTTTCATCATAATTTTTTTTATAGTTATACCTATCATAATTGGAGGTTTTGGTAATTGATTAGTTCCTTTAATACTAGGCGCCCCTGATATAGCATTTCCACGAATAAATAATATAAGGTTTTGACTTCTCCCCCCCTCATTAACTTTATTAATTATAAGTAGAATTGTAGAAAATGGTGCAGGAACCGGATGAACAGTGTATCCCCCGCTTTCATCTAATATTGCCCACAGAGGGTCCTCTGTAGATCTTGCCATTTTTAGACTTCACTTAGCTGGAATCTCATCTATTCTAGGAGCAATTAATTTTATTACTACAGTAATTAATATACGACCTTTAGGAATATCTTTTGATCGAATACCTTTATTTGTATGAGCAGTAGCTATTACAGCATTACTTCTACTATTATCCCTACCTGTATTAGCAGGAGCTATTACAATATTACTTACAGATCGAAACTTAAATACATCTTTCTTTGATCCTGCTGGAGGAGGTGACCCCATTCTCTATCAACACTTATTT
>PSFOR377-13|BC-PNEF-PSFOR0349|Enedreytes sepicola|COI-5P
AACATTATATTTTATCTTTGGGGCTTGAGCTGGAATAATAGGAACCTCTTTAAGTATCCTTATTCGAACAGAATTAAGTAATCCAGGCTCCTTAATTGGAGATGACCAAATTTATAATGTTATTGTTACTGCTCATGCTTTTATCATAATTTTTTTTATAGTAATACCCGTAATAATTGGAGGTTTCGGAAATTGACTTGTCCCGTTAATGCTAGGAGCCCCTGATATAGCTTTCCCCCGAATAAACAATATAAGATTCTGGCTTCTCCCACCCTCATTAACTCTTTTAGTTATAAGAAGAGTAGTAGAAAATGGAGCCGGAACAGGTTGAACAGTTTATCCCCCCCTTTCATCCAATATTGCTCATGGCGGATCCTCCGTCGACCTAGCTATTTTCAGATTACACTTAGCTGGAATCTCTTCTATTTTAGGTGCTGTAAATTTTATTACAACAATTATTAATATACGACCAAGAGGATCAACATTAGACCGTATGCCTTTATTCGTCTGAGCTGTTGGAATTACTGCTTTATTACTTTTATTATCCCTACCCGTCCTTGCTGGAGCAATTACCATACTTTTAACAGATCGAAATTTAAATACGTCATTTTTTGACCCTTCAGG----------------------------------
>PSFOR427-13|BC-PNEF-PSFOR0399|Ernoporicus fagi|COI-5P
AACCCTATACTTTATTTTTGGGGGCTGGTCAGGTCTGGTAGGAACATCTCTTAGTGTATTAATCCGAACAGAGTTGGGAACCCCAAGAAGACTAATTGGAGATGACCAAATTTATAACACCATTGTAACTTCCCATGCCTTTATTATAATTTTCTTTATAGTTATGCCCATCATAATTGGGGGATTTGGTAATTGGTTAGTTCCACTAATACTAGGAGCACCAGACATAGCATTCCCACGACTTAATAATATAAGATTTTGACTACTTCCCCCATCCCTAACCCTATTATTAATAAGATCAATTTCAGATAAAGGGGCCGGGACAGGTTGAACAGTTTACCCACCTTTATCAATAAATGTAGCCCATAGAGGCCCTTCAGTAGATTTAGCCATCTTTAGACTACATATAGCAGGAGTATCCTCAATTCTTGGGGCAATTAATTTTATTTCTACTATTTACAACATGCATCCAGAAGGGGTTAAACCTGAACAACTAACCCTATTTGCATGAGCAGTTAAAATTACAGCAATTCTACTTTTATTATCCCTCCCAGTGCTGGCCGGAGCTATCACTATACTACTAACAGATCGAAATATTAATACCTCATTTTTTGACCCATCCGGAGGGGGGGATCCAGTCTTATACCAACACCTATTC
>PSFOR426-13|BC-PNEF-PSFOR0398|Ernoporicus fagi|COI-5P
AACCCTATACTTTATTTTTGGGGGCTGGTCAGGTCTGGTAGGAACATCTCTTAGTGTATTAATCCGAACAGAGTTGGGAACCCCAAGAAGACTAATTGGAGATGACCAAATTTATAACACCATTGTAACTTCCCATGCCTTTATTATAATTTTCTTTATAGTTATGCCCATCATAATTGGGGGATTTGGTAATTGGTTAGTTCCACTAATACTAGGAGCACCAGACATAGCATTCCCACGACTTAATAATATAAGATTTTGACTACTTCCCCCATCCCTAACCCTATTATTAATAAGATCAATTTCAGATAAAGGGGCCGGGACAGGTTGAACAGTTTACCCACCTTTATCAATAAATGTAGCCCATAGAGGCCCTTCAGTAGATTTAGCCATCTTTAGACTACATATAGCAGGAGTATCCTCAATTCTTGGGGCAATTAATTTTATTTCTACTATTTACAACATGCATCCAGAAGGGGTTAAACCTGAACAACTAACCCTATTTGCATGAGCAGTTAAAATTACAGCAATTCTACTTTTATTATCCCTCCCAGTGCTGGCCGGAGCTATCACTATACTACTAACAGATCGAAATATTAATACCTCATTTTTTGACCCATCCGGAGGGGGGGATCCAGTCTTATACCAACACCTATTC
>PSFOR407-13|BC-PNEF-PSFOR0379|Ernoporicus fagi|COI-5P
AACCCTATACTTTATTTTTGGGGGCTGGTCAGGTCTGGTAGGAACATCTCTTAGTGTATTAATCCGAACAGAGTTGGGAACCCCAAGAAGACTAATTGGAGATGACCAAATTTATAACACCATTGTAACTTCCCATGCCTTTATTATAATTTTCTTTATAGTTATGCCCATCATAATTGGGGGATTTGGTAATTGGTTAGTTCCACTAATACTAGGAGCACCAGACATAGCATTCCCACGACTTAATAATATAAGATTTTGACTACTTCCCCCATCCCTAACCCTATTATTAATAAGATCAATTTCAGATAAAGGGGCCGGGACAGGTTGAACAGTTTACCCACCTTTATCAATAAATGTAGCCCATAGAGGCCCTTCAGTAGATTTAGCCATCTTTAGACTACATATAGCAGGAGTATCCTCAATTCTTGGGGCAATTAATTTTATTTCTACTATTTACAACATGCATCCAGAAGGGGTTAAACCTGAACAACTAACCCTATTTGCATGAGCAGTTAAAATTACAGCAATTCTACTTTTATTATCCCTCCCAGTGCTGGCCGGAGCTATCACTATACTACTAACAGATCGAAATATTAATACCTCATTTTTTGACCCATCCGGAGGGGGGGATCCAGTCTTATACCAACACCTATTC
>PSFOR996-14|PASSIFOR-NM13-016|Eucnemis capucina|COI-5P
TACCTTATACTTTATTTTTGGAATTTTCTCTGGAATAATAGGAACTTCACTAAGATTATTAATTCGATCCGAATTAGCTACACCAAGAGCATTAATTGGTAATGACCAAATTTATAATGTTATTGTAACTACCCATGCATTCATCATAATTTTTTTTATAGTAATACCTGTTATAATAGGGGGATTTGGAAACTGATTAGTACCCCTAATACTCGGGGCTCCTGATATAGCTTTCCCTCGTATAAATAACATGAGATTCTGATTGCTACCCCCTTCTCTATCTCTTCTATTAATAAGAAGAATAGTGGAAAGAGGATCAGGGACTGGATGAACAGTTTACCCTCCTTTAGCTTCTAATATTGCCCATAGAGGGTCCTCAGTTGACTTAACAATTTTTAGTCTTCATATCGCCGGTATTTCATCTATTTTAGGTGCAATTAACTTTATTGCTACCATTATTAATATACACCCTAAGGCTATAACTATAGAAAAAATACCCTTATTTATTTGGTCAATCTTACTCACTGCAATTTTATTACTGCTAGCCCTTCCAGTATTGGCTGGGGCAATCACAATATTACTAACTGATCGAAACTTAAATACCTCTTTCTTTGATCCTGCTGGAGGAGGTGACCCAATCCTTTATCAACACTTATTT
>PSFOR351-13|BC-PNEF-PSFOR0323|Eulagius filicornis|COI-5P
-----------------------------------------------------------------------------------------------------------------------------------------------------------------------------------------------------------------------------------------------------------TAAGATTTTGACTTCTCCCCCCTTCACTAACTCTTTTAATTATAAGAAGAGTAGTAGAAAATGGAGCAGGAACTGGATGAACAGTATACCCGCCACTTTCGTCTAATATTGCCCATAGAGGATCCTCAGTAGATCTAGCCATTTTTAGCCTCCATTTAGCAGGAATCTCATCAATTTTAGGAGCAATTAATTTTATCACTACAGTAATTAATATACGCCCAAAAGGAATAACATTTGACCGAATACCTTTATTTGTATGATCTATCGCTATTACTGCTTTATTATTACTTTTATCATTACCAGTTTTAGCAGGAGCAATTACAATACTACTCACTGATCGAAATTTAAATACATCTTTTT-----------------------------------------------
>PSFOR1019-14|PASSIFOR-NM13-039|Eulagius filicornis|COI-5P
TACATTATATTTTATTTTTGGTGCTTGATCAGGAATAGTAGGTACTTCATTGAGAATCCTAATCCGAACAGAGCTGAGAAATCCTGGAGCATTAATTGGTGACGATCAAATTTATAATGTTATCGTTACAGCTCATGCTTTTATTATAATTTTCTTTATGGTTATGCCAATCATAATAGGAGGTTTTGGAAATTGATTAGTTCCTTTAATGCTTGGAGCACCTGATATAGCTTTCCCTCGAATAAATAATATAAGATTTTGACTTCTCCCCCCTTCACTAACTCTTTTAATTATAAGAAGAGTAGTAGAAAATGGAGCAGGAACTGGATGAACAGTATACCCGCCACTTTCGTCTAATATTGCCCATAGAGGATCCTCAGTAGATCTAGCCATTTTTAGCCTCCATTTAGCAGGAATCTCATCAATTTTAGGAGCAATTAATTTTATCACTACAGTAATTAATATACGCCCAAAAGGAATAACATTTGACCGAATACCTTTATTTGTATGATCTATCGCTATTACTGCTTTATTATTACTTTTATCATTACCAGTTTTAGCAGGAGCAATTACAATACTACTCACTGATCGAAATTTAAATACATCTTTTTTTGACCCAGCTGGTGGGGGGGACCCAATTTTATACCAACATTTATTT
>PSFOR350-13|BC-PNEF-PSFOR0322|Eulagius filicornis|COI-5P
TACATTATATTTTATTTTTGGTGCTTGATCAGGAATAGTAGGTACTTCATTGAGAATCCTAATCCGAACAGAGCTGAGAAATCCTGGAGCATTAATTGGTGACGATCAAATTTATAATGTTATCGTTACAGCTCATGCTTTTATTATAATTTTCTTTATGGTTATGCCAATCATAATAGGAGGTTTTGGAAATTGATTAGTTCCTTTAATGCTTGGAGCACCTGATATAGCTTTCCCTCGAATAAATAATATAAGATTTTGACTTCTCCCCCCTTCACTAACTCTTTTAATTATAAGAAGAGTAGTAGAAAATGGAGCAGGAACTGGATGAACAGTATACCCGCCACTTTCGTCTAATATTGCCCATAGAGGATCCTCAGTAGATCTAGCCATTTTTAGCCTCCATTTAGCAGGAATCTCATCAATTTTAGGAGCAATTAATTTTATCACTACAGTAATTAATATACGCCCAAAAGGAATAACATTTGACCGAATACCTTTATTTGTATGATCTATCGCTATTACTGCTTTATTATTACTTTTATCATTACCAGTTTTAGCAGGAGCAATTACAATACTACTCACTGATCGAAATTTAAATACATCTTTTTTTGACCCAGCTGGTGGGGGGGACCCAATTTTATACCAACATTTATTT
>PSFOR356-13|BC-PNEF-PSFOR0328|Eulagius filicornis|COI-5P
TACATTATATTTTATTTTTGGTGCTTGATCAGGAATAGTAGGTACTTCATTGAGAATCCTAATCCGAACAGAGCTGAGAAATCCTGGAGCATTAATTGGTGACGATCAAATTTATAATGTTATCGTTACAGCTCATGCTTTTATTATAATTTTCTTTATGGTTATGCCAATCATAATAGGAGGTTTTGGAAATTGATTAGTTCCTTTAATGCTTGGAGCACCTGATATAGCTTTCCCTCGAATAAATAATATAAGATTTTGACTTCTCCCCCCTTCACTAACTCTTTTAATTATAAGAAGAGTAGTAGAAAATGGAGCAGGAACTGGATGAACAGTATACCCGCCACTTTCGTCTAATATTGCCCATAGAGGATCCTCAGTAGATCTAGCCATTTTTAGCCTCCATTTAGCAGGAATCTCATCAATTTTAGGAGCAATTAATTTTATCACTACAGTAATTAATATACGCCCAAAAGGAATAACATTTGACCGAATACCTTTATTTGTATGATCTATCGCTATTACTGCTTTATTATTACTTTTATCATTACCAGTTTTAGCAGGAGCAATTACAATACTACTCACTGATCGAAATTTAAATACATCTTTTTTTGACCCAGCTGGTGGGGGGGACCCAATTTTATACCAACATTTATTT
>PSFOR349-13|BC-PNEF-PSFOR0321|Eulagius filicornis|COI-5P
TACATTATATTTTATTTTTGGTGCTTGATCAGGAATAGTAGGTACTTCATTGAGAATCCTAATCCGAACAGAGCTGAGAAATCCTGGAGCATTAATTGGTGACGATCAAATTTATAATGTTATCGTTACAGCTCATGCTTTTATTATAATTTTCTTTATGGTTATGCCAATCATAATAGGAGGTTTTGGAAATTGATTAGTTCCTTTAATGCTTGGAGCACCTGATATAGCTTTCCCTCGAATAAATAATATAAGATTTTGACTTCTCCCCCCTTCACTAACTCTTTTAATTATAAGAAGAGTAGTAGAAAATGGAGCAGGAACTGGATGAACAGTATACCCGCCACTTTCGTCTAATATTGCCCATAGAGGATCCTCAGTAGATCTAGCCATTTTTAGCCTCCATTTAGCAGGAATCTCATCAATTTTAGGAGCAATTAATTTTATCACTACAGTAATTAATATACGCCCAAAAGGAATAACATTTGACCGAATACCTTTATTTGTATGATCTATCGCTATTACTGCTTTATTATTACTTTTATCATTACCAGTTTTAGCAGGAGCAATTACAATACTACTCACTGATCGAAATTTAAATACATCTTT-------------------------------------------------
>PSFOR051-13|BC-PNEF-PSFOR0023|Evodinus clathratus|COI-5P
---TCTTTACTTTATTTTCGGTGCTTGAGCAGGAATGGTGGGAACATCACTTAGAATATTAATTCGTTCAGAATTAGGAAACCCTGGATCTTTAATTGGAGATGATCAAATTTACAATGTAATTGTTACTGCGCATGCTTTTGTAATAATTTTTTTTATAGTTATACCTATTATAATTGGAGGATTTGGAAATTGATTAGTACCCCTTATACTAGGGGCTCCTGATATAGCTTTCCCTCGAATAAATAATATAAGATTTTGATTATTACCACCATCTTTAATTCTTCTGATTATAAGCAGGGTAGTAGAAAATGGTGCAGGTACAGGCTGAACTGTTTATCCCCCACTTTCGTCTAATATTGCTCATAGCGGATCTTCTGTAGATTTAGCTATTTTTAGACTTCACCTAGCCGGTATCTCATCAATTTTAGGAGCAGTAAATTTCATTACAACTGTTATTAAT---------------------------------------------------------------------------------------------------------------------------------------------------------------------------------------------------
>PSFOR122-13|BC-PNEF-PSFOR0094|Exocentrus adspersus|COI-5P
TACTTTGTATTTTTTATTTGGAGCATGAGCTGCTATGGTAGGAACATCCCTAAGATTATTAATTCGTTCTGAATTAGGAAATCCTGGATCTTTAATTGGAGATGATCAAATTTATAATGTAATTGTAACTGCTCATGCTTTTATTATAATTTTTTTTATAGTTATACCCATTATAATTGGTGGATTTGGTAATTGATTAGTTCCTTTAATATTAGGCGCTCCTGATATGGCCTTTCCTCGAATAAATAATATAAGATTCTGATTATTACCGCCTTCTTTAAGATTATTAATTATAAGAAGAATTGTTGATAATGGAGCAGGAACAGGATGAACAGTATATCCTCCTTTATCTGCTAATATTGCTCATAGAGGTTCATCAGTAGATTTAGCTATCTTTAGATTACATTTAGCAGGAATTTCCTCAATTTTAGGAGCAGTAAATTTTATTACAACAGTAATTAATATACGTCCAAAAGGAATAACCTTTGATCGTCTTTCATTATTTATTTGGGCAGTAAAAATTACTGCAATTTTATTATTACTATCTTTACCTGTTTTAGCAGGAGCAATTACTATATTATTAACAGATCGAAATTTAAATACATCTTTTTTTGATCCTGCTGGAGGTGGAGATCCTATTCTTTATCAACACTTATTT
>PSFOR123-13|BC-PNEF-PSFOR0095|Exocentrus lusitanus|COI-5P
AACATTATACTTTATTTTTGGTGCCTGAGCTGCTATAGTAGGAACTTCATTAAGTTTATTAATTCGTTCCGAATTAGGCTCTCCTGGATCCCTGATTGGAGACGATCAAATTTACAATGTGATCGTTACAGCTCATGCCTTTATTATAATTTTTTTTATAGTAATACCAATCATAATTGGAGGATTTGGAAATTGATTAATTCCACTAATACTTGGAGCCCCTGATATAGCATTTCCTCGTATAAATAATATAAGATTTTGATTACTCCCCCCATCATTAAGTTTATTAATTATAAGAAGAATTGTTGAAAATGGAGCTGGTACTGGTTGAACTGTATACCCACCACTATCTGCAAATATTGCTCATAGTGGATCTTCAGTTGATCTTGCTATTTTTAGATTACATTTAGCAGGAATCTCTTCAATTCTAGGTGCAGTAAATTTTATTACTACTGTAATTAATATACGCCCCATAGGTATAATATTTGATCGATTATCTTTATTTATCTGAGCCGTAAAAATTACTGCAATTTTATTATTACTTTCATTACCTGTATTAGCAGGCGCAATTACTATACTTTTAACAGATCGTAACTTAAATACATCCTTCTTTGACCCCGCAGGAGGAGGAGACCCAATCCTCTATCAACATCTTTTT
>PSFOR124-13|BC-PNEF-PSFOR0096|Exocentrus punctipennis|COI-5P
TACATTATACTTTATCTTTGGAGCATGAGCTGCAATAGTAGGTACTTCCCTTAGATTATTAATTCGTTCTGAACTAGGAAATCCCGGATCTTTAATTGGAGATGATCAAATTTACAATGTAATCGTTACTGCCCATGCCTTTATTATAATTTTTTTTATGGTAATACCTATTATAATTGGAGGATTTGGAAATTGACTAGTGCCTTTAATACTTGGTGCTCCTGATATAGCATTCCCTCGAATAAATAACATAAGATTTTGATTACTTCCACCCTCTCTAAGATTATTAATTATAAGTAGAATTGTTGAAAATGGTGCTGGAACAGGATGAACTGTTTATCCTCCTTTATCTGCTAATATCGCTCATAGAGGTTCTTCTGTTGACTTGGCAATTTTTAGATTACATTTAGCTGGAATTTCCTCTATTCTTGGTGCAGTAAATTTTATTACTACAGCAATTAATATACGACCAATAGGAATAATATTTGATCGTTTATCTCTTTTTATCTGAGCCGTAAAAATTACTGCAATTCTTCTCTTATTATCCTTACCTGTTCTTGCTGGTGCAATCACAATACTCTTAACAGATCGTAATTTAAATACATCTTTTTTCGATCCCGCTGGAGGAGGGGACCCAATTCTTTACCAACATTTATTT
>PSFOR697-13|BC-PNEF-PSFOR0574|Gastrallus knizeki|COI-5P
TACTTTATATTTTATCTTCGGAGCCTGATCAGGTATAGTAGGAACCTCTTTAAGAATATTAATTCGATCAGAATTAGGAAACCCTGGAGCATTAATTGGAGACGATCAAATTTATAATGTTATTGTTACAGCTCATGCCTTCATTATAATTTTCTTTATAGTAATACCTATTATAATTGGAGGATTTGGTAATTGATTAGTACCATTAATACTTGGAGCCCCTGATATAGCTTTTCCACGAATAAATAATATAAGATTTTGATTATTACCCCCCTCATTATCACTTTTATTAATAAGAAGAATAGTAAATAAAGGAGCAGGAACAGGATGAACAGTATACCCCCCACTTTCATCAAATATTGCTCATAGAGGAGCATCTGTAGATTTAGCTATTTTTAGATTACATTTAGCTGGGATTTCTTCAATTCTAGGTGCTGTAAATTTTATTACTACAGTAATCAATATACGACCAATAGAAATAACTTTTGATCGTATACCTTTACTTGTTTGATCAGTTGTTATTACAGCCCTGTTATTATTACTTTCTTTACCAGTATTAGCAGGAGCTATTACTATATTACTAACAGATCGTAATTTAAATACATCCTTCTTTGACCCTGCAGGAGGAGGAGATCCTATTCTGTACCAACACTTATTT
>PSFOR1040-14|PASSIFOR-NM13-060|Gastrallus laevigatus|COI-5P
TACCTTATATTTTATCTTCGGAGCCTGATCAGGTATAGTAGGAACTTCTTTAAGAATATTAATTCGATCAGAATTAGGAAACCCTGGAGCATTAATTGGAGACGATCAAATTTATAATGTTATTGTTACAGCTCATGCCTTCATTATAATTTTCTTTATAGTAATACCTATTATAATTGGAGGATTTGGTAATTGATTAGTACCATTAATACTTGGAGCTCCTGATATAGCTTTTCCCCGAATAAATAATATAAGATTTTGATTATTGCCTCCCTCATTATCACTTTTATTAATAAGAAGAATAGTAAATAAAGGAGCAGGAACAGGATGAACAGTATACCCCCCACTTTCATCAAATATTGCTCATAGAGGAGCATCTGTAGACTTAGCTATTTTTAGATTACACTTAGCTGGGATTTCTTCAATTCTAGGTGCTGTAAATTTTATTACTACAGTAATCAATATACGACCAATAGAAATAACTTTTGATCGTATACCTTTACTTGTTTGATCAGTTGTAATTACAGCCTTATTATTACTACTCTCTTTACCAGTGTTAGCAGGAGCAATTACTATATTATTAACAGATCGTAATTTAAATACATCCTTTTTTGACCCTGCAGGGGGAGGAGATCCTATTCTCTACCAACACCTATTT
>PSFOR442-13|BC-PNEF-PSFOR0414|Glaphyra umbellatarum|COI-5P
AACTTTATATTTTATTTTTGGAGCATGGGCCGGAATAGTAGGAACCGCAATGAGAATATTAATTCGTACTGAATTGGGAAATCCCGGCTCACTAATTGGAGATGACCAGATCTATAATGTAATTGTTACAGCTCATGCTTTTGTAATAATTTTCTTCATAGTTATGCCCATTATAATCGGGGGGTTTGGAAATTGATTAGTCCCTTTAATATTAGGGGCCCCAGATATAGCATTCCCACGAATAAATAATATAAGATTTTGATTACTGCCCCCCTCATTAACTCTTCTAATTTTAAGAAGAATTGTAGAAAGAGGGGCTGGGACAGGATGAACAGTTTATCCCCCCCTTTCTTCCAATATTGCTCACGGAGGTTCTTCTGTAGATTTGGCTATTTTTAGACTTCATTTAGCGGGAATTTCATCAATTTTAGGTGCAGTTAATTTTATTTCTACTGTAATTAACATACGGCCTGTAGGTATAAGTTTAGAACGAATACCGTTATTTGTATGGGCCGTAGTAATTACAGCCATTTTATTACTTCTATCATTACCTGTATTAGCCGGAGCTATTACAATACTATTAACAGACCGAAATATTAACACATCATTTTTTGACCCAGCAAGAGGGGGGGACCCAATTTTATACCAGCACTTATTC
>PSFOR239-13|BC-PNEF-PSFOR0211|Gnorimus nobilis|COI-5P
AACTCTTTATTTCCTATTTGGTAGCTGAGCCGGAATAGTAGGAACATCCCTAAGATTACTAATTCGAGCCGAACTGGGTAACCCCGGGTCACTAATTGGAGACGATCAGATTTATAACGTTATTGTTACTGCTCATGCTTTCATCATAATTTTTTTCATAGTAATACCAATTATAATTGGGGGATTCGGAAATTGACTTGTCCCATTAATACTAGGTGCCCCTGATATAGCATTCCCTCGAATAAATAACATAAGATTCTGACTACTTCCCCCCTCTTTAACTTTATTATTAATAAGAAGATTAGTAGAAAATGGAGCAGGCACAGGATGGACTGTTTATCCCCCCCTCTCTAGAAACCTGGCACACAGAGGAGCTTCAGTCGATCTAGCCATTTTTAGCCTCCATTTAGCAGGAATTTCATCAATTCTAGGAGCTGTAAATTTTATTACTACAGTAATCAATATACGATCTACCGGAATATCATTTGATCGAATACCTTTATTTGTTTGATCAGTTGCATTAACGGCCCTACTTTTACTTCTATCCTTACCTGTTCTAGCTGGAGCAATCACTATACTTCTAACAGACCGTAATATTAATACTTCATTCTTCGACCCAGCAGGAGGTGGTGACCCTATTTTATACCAACATTTATTT
>PSFOR240-13|BC-PNEF-PSFOR0212|Gnorimus variabilis|COI-5P
AACACTTTATTTCCTATTTGGTAGATGAGCTGGAATAGTAGGTACATCCCTAAGATTACTAATCCGAGCTGAACTAGGTAACCCTGGGTCACTAATTGGAGACGATCAAATCTACAACGTAATTGTCACAGCACATGCTTTTATCATAATTTTTTTCATGGTAATACCTATTATAATTGGTGGATTCGGAAATTGACTTGTTCCTCTAATATTGGGGGCCCCTGACATAGCATTTCCCCGAATAAACAATATAAGATTTTGATTACTACCCCCTTCTCTAACTCTCCTTTTAATAAGAAGCTTAGTAGAAAATGGAGCAGGAACAGGATGAACTGTTTACCCCCCCCTCTCCAGAAATCTCGCCCATAGAGGAGCTTCAGTAGATTTAGCTATCTTTAGACTTCATTTAGCAGGAATCTCTTCAATTCTAGGAGCTGTAAATTTTATTACTACTGTAATTAACATACGATCTACTGGTATAACATTTGACCGAATGCCTTTGTTTGTTTGATCAGTTGCATTAACGGCCTTACTTTTACTGCTATCTTTACCCGTACTTGCGGGAGCAATCACAATATTATTAACAGACCGTAATATCAATACCTCATTCTTTGACCCAGCAGGCGGCGGAGATCCAATTTTATACCAACATTTATTT
>PSFOR390-13|BC-PNEF-PSFOR0362|Gonodera luperus|COI-5P
AACACTTTATTTTATCTTCGGGGCATGAGCTGGAATAGTAGGGACATCACTTAGTCTATTAATCCGTGCAGAATTAGGAAACCCCGGTTCTCTAATTGGAGATGACCAAATCTACAACGTGATCGTTACCGCTCATGCATTCGTTATAATTTTCTTCATAGTTATACCAATTATAATTGGAGGGTTTGGTAACTGGCTAGTCCCGTTAATATTAGGGGCACCCGACATAGCATTCCCACGAATAAATAATATAAGATTCTGACTACTACCTCCGTCTCTTACCCTCTTACTTATAAGAAGAGTAGTAGAAAGAGGGGCTGGAACTGGGTGAACAGTATACCCACCCCTATCATCTAATATTGCCCATGGAGGAGCCTCAGTAGACTTAGCAATTTTTAGATTACATTTAGCTGGAATTTCTTCAATTCTTGGAGCAGTTAATTTTATTACTACTGTAATCAACATACGACCACAAGGAATAACTTTTGACCGAATACCTTTATTTGTATGAGCAGTAGTAATCACCGCTGTACTTCTACTTCTATCCCTCCCAGTTCTTGCAGGGGCTATTACTATGTTGCTAACCGACCGAAATATCAATACATCCTTTTTTGACCCAGCAGGAGGAGGAGACCCAATTCTTTATCAACACTTATTC
>PSFOR205-13|BC-PNEF-PSFOR0177|Gonodera luperus|COI-5P
AACACTTTATTTTATCTTCGGGGCATGAGCTGGAATAGTAGGGACATCACTTAGTCTATTAATCCGTGCAGAATTAGGAAACCCCGGTTCTCTAATTGGAGATGACCAAATCTACAACGTGATCGTTACCGCTCATGCATTCGTTATAATTTTCTTCATAGTTATACCAATTATAATTGGAGGGTTTGGTAACTGGCTAGTCCCGTTAATATTAGGGGCACCCGACATAGCATTCCCACGAATAAATAATATAAGATTCTGACTACTACCTCCGTCTCTTACCCTCTTACTTATAAGAAGAGTAGTAGAAAGAGGGGCTGGAACTGGGTGAACAGTATACCCACCCCTATCATCTAATATTGCCCATGGAGGAGCCTCAGTAGACTTAGCAATTTTTAGATTACATTTAGCTGGAATTTCTTCAATTCTTGGAGCAGTTAATTTTATTACTACTGTAATCAACATACGACCACAAGGAATAACTTTTGACCGAATACCTTTATTTGTATGAGCAGTAGTAATCACCGCTGTACTTCTACTTCTATCCCTCCCAGTTCTTGCAGGGGCTATTACTATGTTGCTAACCGACCGAAATATCAATACATCCTTTTTTGACCCAGCAGGAGGAGGAGACCCAATTCTTTATCAACACTTATTC
>PSFOR985-14|PASSIFOR-NM13-005|Grammoptera abdominalis|COI-5P
TACATTATATTTTATTTTTGGTGCTTGAGCAGGAATAGTAGGAACATCTCTTAGTTTATTAATTCGTTCAGAATTAGGTAATCCTGGTTCTTTAATTGGTGATGATCAAATTTATAATGTAATTGTTACAGCTCATGCATTTGTAATAATTTTCTTTATGGTTATACCTATTATAATTGGAGGATTTGGAAATTGATTAGTACCTTTAATATTAGGTGCTCCTGATATAGCTTTCCCTCGAATAAATAATATGAGATTTTGATTATTACCTCCATCTTTAACTTTACTTATTATAAGAAGAATTACTGAAAGAGGGGCTGGTACAGGTTGAACAGTTTACCCACCTCTTTCATCTAATATTGCACATGGTGGATCTTCAGTAGATTTAGCAATTTTCAGATTACATTTAGCCGGAATTTCATCAATTCTTGGAGCTGTAAATTTTATTACTACTGTTATTAATATGCGACCTGTTGGAATAAGACTTGAACGAATACCTTTATTTGTTTGGGCTGTTGTAATTACCGCTATTTTACTTCTGTTATCCTTACCAGTATTAGCAGGAGCTATTACTATACTTTTAACAGATCGAAACTTAAACACTTCTTTTTTTGATCCTGCTGGAGGTGGTGATCCTATTTTATATCAACATTTATTT
>PSFOR984-14|PASSIFOR-NM13-004|Grammoptera ruficornis|COI-5P
CACATTATACTTCATTTTTGGGGCATGGGCAGGAATAGTTGGAACATCCCTAAGAATTTTAATCCGAACTGAACTCGGAAATCCAGGCTCTTTAATTGGTGATGATCAAATTTATAATGTTATTGTTACAGCTCATGCATTTATTATAATTTTCTTTATAGTAATACCTATTATAATTGGCGGTTTTGGAAATTGATTAGTGCCTCTAATATTAGGGGCTCCAGATATGGCATTTCCACGAATAAATAATATAAGATTCTGATTATTACCTCCTTCTTTAACTCTCTTAATTATAAGGAGAATTGTTGAAAGAGGAGCAGGAACAGGATGAACTGTTTACCCACCTCTCTCTTCAAATATTGCCCATGGGGGATCTTCTGTTGATTTAGCTATCTTCAGCCTACATTTAGCTGGAATTTCATCAATTTTAGGAGCAGTAAATTTTATTACAACAGTAATTAATATACGACCTACAGGTATAAGTCTAGAACGAATACCTTTATTTGTTTGAGCAGTAGTAATCACAGCAATTTTATTATTACTATCTCTACCCGTTCTAGCAGGTGCTATTACAATATTATTAACCGATCGAAATTTAAACA--------------------------------------------------------
>PSFOR434-13|BC-PNEF-PSFOR0406|Grammoptera ustulata|COI-5P
TACATTATATTTTATTTTTGGAGCTTGAGCAGGAATAGTAGGAACATCCCTTAGTCTATTGATTCGTTCAGAATTAGGTAATCCTGGTTCTTTAATTGGTGATGATCAAATCTATAACGTGATTGTTACAGCTCATGCATTCGTAATAATTTTTTTTATAGTTATACCTATTATAATTGGAGGATTTGGAAATTGATTAGTACCCTTAATATTAGGTGCCCCTGATATAGCTTTCCCTCGAATAAATAATATAAGATTTTGATTATTACCCCCTTCTTTAACTTTACTTATTATAAGAAGAATTACTGAAAGAGGGGCTGGAACAGGTTGAACAGTATACCCACCCTTATCATCTAATATTGCCCATGGTGGATCTTCAGTAGATTTAGCAATCTTTAGATTGCATTTAGCAGGAATTTCTTCAATTCTAGGAGCTGTAAACTTTATCACTACTGTAATTAATATACGACCTGTAGGTATAAGGCTTGAACGAATACCTTTATTTGTTTGAGCTGTTGTAATTACTGCTATTTTACTTCTTTTATCTTTACCAGTATTAGCAGGAGCTATTACTATACTTTTAACTGATCGAAATTTAAATACTTCTTTTTTTGATCCTGCTGGAGGTGGTGATCCTATTTTATACCAACATTTATTT
>PSFOR692-13|BC-PNEF-PSFOR0569|Grynobius planus|COI-5P
-----------------------------------------------------------------------------------------------------------------------------------------------------------------------------------------------------------------------------------------------------------TAAGATTCTGACTACTACCTCCCTCGTTATCTCTTCTATTAACAAGAAGAATTGTAGAAAGAGGAGCAGGGACAGGATGAACTGTATACCCACCTCTTTCATCAAACATCGCACACAGAGGAGCATCTGTAGATCTAGCAATCTTTAGACTTCACCTTGCTGGCGTATCATCAATTCTAGGAGCCGTAAACTTCATCACAACAGTGATCAACATACGACCTGCTGGTATAAAATTTGACCGAATACCCCTATTCGTTTGATCAGTTGCCATTACGGCACTATTACTACTCCTATCACTACCTGTTCTTGCCGGAGCAATTACCATATTGTTAACTGACCGTAACCTAAACACGTCATTCTTCGACCCAGCAGGAGGAGGAGACCCTATCCTGTACCAGCACCTATTT
>PSFOR557-13|BC-PNEF-PSFOR0434|Grynocharis oblonga|COI-5P
AACTCTCTATTTCATTTTTGGAGCATGAGCAGGGATAGTAGGAACATCTATAAGACTTTTAATTCGTACAGAATTAGGTAATCCTGGGACATTAATTGGTAATGACCAAATCTATAATGTTATTGTTACAGCTCATGCATTTATCATAATTTTTTTTATAGTTATACCCATTATAATTGGGGGTTTTGGAAACTGACTAGTTCCCTTAATATTAGGGGCCCCTGATATAGCTTTTCCCCGAATAAATAACATAAGATTTTGACTACTACCTCCTTCTTTAACTCTTCTAATTATAAGAAGAATTGTAGAAAGAGGAGCAGGAACAGGTTGAACTGTATACCCCCCTTTATCATCCAATATTGCTCATGGAGGATCTTCTGTAGATTTAGCAATTTTTAGATTACATTTAGCAGGTGTATCATCAATTCTAGGAGCAGTAAATTTTATTACTACAGTAATTAATATACGCCCAGCCGGAATAACTTTTGACCGAATACCTTTATTTGTATGAGCCGTAGCAATTACAGCTTTATTATTATTATTATCCCTTCCTGTCCTTGCAGGAGCAATCACTATACTTTTAACTGACCGAAACTTAAATACATCTTTTTTTGATCCAGCAGGAGGGGGTGACCCTATTCTTTATCAACATTTATTT
>PSFOR698-13|BC-PNEF-PSFOR0575|Hadrobregmus denticollis|COI-5P
-----------------------------------------------------------------------------------------------------------------------------------------------------------------------------------------------------------------------------------------------------------TAAGATTTTGATTACTCCCCCCTTCATTATCCTTATTATTAATAAGAAGAATAGTAGATAGAGGAGCAGGAACAGGATGAACCGTTTATCCCCCCCTATCATCCAATATTGCTCACTCAGGGCCATCTATTGATTTAGCAATTTTTAGACTACACTTGGCTGGAATCTCTTCAATTCTTGGAGCAGTAAATTTTATTACTACAGTAATTAATATGCGTCCTATTGAAATAGTATTTGAACGTATACCTCTATTTACTTGATCAGTAGTAATTACAGCTCTTCTCCTCCTTTTATCTTTACCAGTTTTAGCAGGAGCTATCACCATACTTTTAACAGATCGAAATATTAACACATCTTTTTTTGACCCCTCTGGAGGGGGAGATCCAATTCTTTACCAGCATTTATTT
>PSFOR1047-14|PASSIFOR-NM13-067|Hadrobregmus denticollis|COI-5P
----------------------------------------------------------------------GAATTAAGTAACTCCGGCTCACTAATTGGAAATGATCAAATTTATAACGTAATCGTTACCGCTCATGCATTTATTATAATTTTTTTTATAGTTATACCAATTATAATTGGAGGGTTCGGAAATTGAATCTTACCTTTACTAATTGGAGCCCCAGATATAGCATTTCCTCGAATAAATAATATAAGATTTTGATTACTCCCCCCTTCATTATCCTTATTATTAATAAGAAGAATAGNAGATAGAGGAGCAGGAACAGGATGAACCGTTTATCCCCCCCTATCATCCAATATTGCTCACTCAGGGCCATCTATTGATTTAGCAATTTTTAGACTACACTTGGCTGGAATCTCTTCAATTCTTGGAGCAGTAAATTTTATTACTACAGTAATTAATATGCGTCCTATTGAAATAGTATTTGAACGTATACCTCTATTTACTTGATCAGTAGTAATTACAGCTCTTCTCCTCCTTTTATCTTTACCNGTTTTAGCAGGAGCTATCACCATACTTTTANCAGATCGAAATATTAACACATCTTTTTTTGACCCCTCNGGAGGGGGAGATCCAATTCTTTACCAGCATTTATTT
>PSFOR699-13|BC-PNEF-PSFOR0576|Hadrobregmus pertinax|COI-5P
-----------------------------------------------------------------------------------------------------------------------------------------------------------------------------------------------------------------------------------------------------------TGAGATTTTGATTACTTCCTCCCTCACTGTCACTCCTTTTAATAAGAAGGTCTGTTGATAGAGGAGCAGGTACAGGTTGAACTGTTTATCCTCCGCTATCTTCTAATATTGCCCATAGAGGGGCATCTGTAGATTTAGCAATTTTTAGATTACATCTTGCAGGTATTTCTTCAATTCTTGGGGCAGTAAATTTTATTAGTACTGTAATTAATATACGACCTGTGGGGTTATCGTTTGATCAAATACCTTTATTTGTGTGAAGTGTAGTTATTACCGCTTTTCTTCTATTACTTTCTTTACCAGTATTAGCTGGGGCAATTACTATATTATTAACTGATCGAAATATTAATACGTCATTTTTTGATCCAGCAGGTGGGGGTGACCCAATTTTGTACCAACATCTATTT
>PSFOR894-14|BC-PASSIFOR0113|Hallomenus binotatus|COI-5P
AACCTTATATTTTATTTTTGGATCATGATCTGGAATAGTAGGTACTTCTTTAAGAATACTAATTCGATCAGAACTAGGAAACCCTGGATCTCTAATTGGTAATGACCAAATTTATAATGTAATCGTTACTGCTCATGCATTCATCATAATTTTTTTTATAGTTATACCAATTATATTAGGAGGCTTTGGAAACTGATTAGTTCCATTAATATTAGGAGCTCCTGATATGGCTTTCCCTCGAATAAATAATATAAGATTTTGGTTACTCCCCCCTTCTTTAACCTTACTAATTATAAGAAGAATAGTAGAAAATGGTGCAGGAACAGGATGAACTGTTTACCCCCCTCTTTCTTCTAATATTGCCCATAGAGGATCCTCTGTTGATCTAGCTATTTTTAGTCTTCATCTAGCTGGTATTTCTTCTATTTTAGGGGCAATTAATTTTATTACTACTATTATTAATATACGTCCAATCGGAATAACTTTAGATCGAATACCATTATTTGTGTGAGCAGTTTTAATTACAGCAATTTTATTATTATTATCATTACCTGTTCTTGCCGGAGCAATCACTATACTTCTAACAGATCGTAATTTAAATACATCATTTTTTGACCCAGCAGGAGGGGGAGATCCAATTCTTTACCAACATTTATTC
>PSFOR673-13|BC-PNEF-PSFOR0550|Hedobia pubescens|COI-5P
-----------------------------------------------------------------------------------------------------------------------------------------------------------------------------------------------------------------------------------------------------------TAAGATTTTGATTACTTCCCCCTTCAATTTCCCTTCTTCTTGCAAGAAGAGTAGTTGAAAGAGGTGCTGGTACTGGTTGAACTGTTTATCCGCCTTTAGCAGCAAATATTGCCCACAGAGGAGCTTCAGTTGATTTAGCAATTTTTAGACTTCACTTAGCTGGAATCTCGTCCATTCTAGGAGCAGTGAATTTCATTACTACAGTAATTAATATACGGTCCGTGGGAATATCATTTGACCGAATACCATTATTCGTATGATCAGTAGCAATCACTGCATTATTATTACTTCTATCTTTACCAGTATTAGCAGGAGCAATTACAATGTTACTTACAGATCGAAATTTAAATACATCATTTTTTGACCCTGCTGGAGGAGGTGATCCAATTCTTTACCAACATTTATTT
>PSFOR206-13|BC-PNEF-PSFOR0178|Helops coeruleus|COI-5P
AACACTTTACTTCATCTTCGGCGCATGGTCAGGAATAGTTGGTACCTCCCTTAGACTCCTAATTCGAGCAGAATTAGGCAACCCCGGGTCCTTAATCGGAGACGACCAAACATACAACGTCATCGTCACAGCACACGCATTCATCATAATTTTCTTCATAGTCATGCCCATCATAATTGGGGGATTTGGAAACTGGCTCGTACCCCTAATACTAGGAGCCCCTGACATGGCATTCCCACGAATAAATAATATAAGATTTTGACTTCTACCACCCTCACTAACCCTCTTACTAATAAGAAGAATTGTAGAAAACGGAGCAGGAACGGGATGAACAGTGTACCCCCCACTATCATCTAATATTGCACACAGAGGATCCTCAGTTGATCTCGCAATTTTCAGGCTTCATCTAGCAGGAATCTCTTCAATCCTAGGAGCAGTAAACTTCATTACAACAGTAATTAATATACGACCACAAGGAATATCTTTCGATCGAATACCACTATTTGTTTGATCAGTAGTAATTACCGCAGTACTACTGCTACTTTCCCTCCCAGTCCTTGCAGGCGCAATCACAATACTGCTCACAGACCGAAACATTAATACATCCTTCTTCGACCCTGCTGGGGGCGGAGACCCAATCCTATACCAACACTTATTT
>PSFOR700-13|BC-PNEF-PSFOR0577|Hemicoelus canaliculatus|COI-5P
AACTTTATATTTTATTTTTGGTGCATGGTCAGGAATAATTGGAACATCTTTAAGAATTTTAATTCGATCAGAACTTGGAAATCCGGGAGCTTTAATTGGAGACGATCAAATTTATAATGTAATTGTAACAGCTCACGCCTTTATTATGATTTTTTTTATAGTTATACCCATTATAATTGGGGGGTTTGGTAATTGATTAGTACCTTTAATATTAGGAGCACCAGATATAGCATTTCCCCGGATAAACAATATAAGATTTTGATTATTACCTCCTTCCTTATCATTATTGTTAATAAGAAGAGTTATTGATAAAGGTGTAGGTACAGGATGAACTGTTTATCCTCCTTTATCTTCAAATACAGCTCATAGTGGGCCATCAGTTGATTTAGCGATTTTCAGTCTTCATTTAGCCGGAGCTTCTTCAATTCTAGGAGCAGTAAATTTCATTACTACAACAATTAATATACGACCTATAGGAATAAGTTTTGATTGTATACCTTTATTAGTATGAGCTGTAGTAATTACTGCTTTACTTTTATTATTATCCCTACCTGTATTAGCAGGTGCTATTACAATATTATTGACTGATCGTAATCTTAATACTTCTTTTTTTGATCCCGCAGGAGGAGGTGACCCTGTTTTATATCAACATTTATTT
>PSFOR702-13|BC-PNEF-PSFOR0579|Hemicoelus fulvicornis|COI-5P
GACCTTATACTTTATTTTTGGTTCTTGGTCTGGGATAGTTGGTACTTCTTTGAGAATTTTGATTCGTTCTGAACTTGGAAACCCTGGTGCTTTAATTGGAGACGATCAAATTTATAATGTGATTGTAACTGCTCATGCTTTTATTATAATTTTTTTTATAGTTATGCCAATTATAATTGGAGGATTTGGTAATTGATTAGTTCCGTTAATACTGGGAGCTCCTGATATAGCATTCCCTCGAATAAATAATATAAGATTTTGGTTGTTACCCCCATCCTTATCTTTGTTATTAATAAGAAGAATTGTTAACACAGGAGCAGGTACCGGATGAACGGTTTATCCCCCCTTATCTTCAAATACTGCTCATAGTGGGGCATCAGTAGATTTAGCTATTTTTAGTCTACATTTAGCAGGTGCTTCTTCAATTTTAGGAGCTGTAAATTTTATTACTACAGTAATTAATATACGTCCTATAGGAATATCTTTTGATTGTACGCCTTTATTTGTTTGATCCGTAATTATTACAGCTCTTCTTCTTTTGTTATCTTTACCGGTTTTAGCTGGAGCGATTACGATATTATTGACAGATCGAAATTTAAACACATCATTTTTTGACCCTGCTGGAGGGGGGGACCCCATTTTATATCAACACTTATTT
>PSFOR775-13|BC-PNEF-PSFOR0652|Hemicrepidius hirtus|COI-5P
AACACTTTACTTTCTATTTGGAGCCTGATCAGGAATATTAGGAACCTCTTTAAGACTATTAATCCGTGCAGAACTTGGTAACCCGGGATCACTTATTGGGAATGACCAAATTTATAATGTTATTGTTACAGCTCATGCCTTTATCATAATTTTCTTTATAGTTATACCGATTATAATTGGAGGCTTCGGAAACTGGTTAGTTCCACTAATACTTGGAGCTCCAGATATAGCCTTCCCCCGAATAAACAACATAAGATTCTGATTTTTACCGCCTTCTCTCTCACTTTTATTAATAAGAAGAATTGTAGAAAACGGGGCAGGAACAGGATGAACAGTATACCCTCCCCTTTCAGCTAATATTGCTCATAGAGGATCCTCTGTAGACCTAGCTATTTTTAGCCTCCATTTAGCTGGAATCTCGTCAATCCTTGGTGCAGTAAATTTCATTTCAACAGTAATTAACATACGATCCACCGGGATCACGTTTGACCGGATACCTTTATTTGTGTGAGCTGTAGCTATCACGGCACTCTTACTTCTTCTGTCTCTCCCAGTTCTAGCAGGAGCTATCACTATACTTCTAACTGATCGAAATTTAAACACCTCATTCTTTGACCCAGCCGGAGGAGGTGACCCAATTCTTTATCAACATCTATTC
>PSFOR1044-14|PASSIFOR-NM13-064|Hemicrepidius hirtus|COI-5P
AACACTTTACTTTCTATTTGGAGCCTGATCAGGAATATTAGGAACCTCTTTAAGACTACTAATCCGTGCAGAACTTGGTAACCCGGGATCACTTATTGGGAATGACCAAATTTATAATGTTATTGTTACAGCTCATGCCTTTATCATAATTTTCTTTATAGTTATACCGATTATAATTGGAGGCTTCGGAAACTGGTTAGTTCCACTAATACTTGGAGCTCCAGATATAGCCTTCCCCCGAATAAACAACATAAGATTCTGATTTTTACCGCCTTCTCTCTCACTTTTATTAATAAGAAGAATTGTAGAAAACGGGGCAGGAACAGGATGAACAGTATACCCTCCCCTTTCAGCTAATATTGCTCATAGAGGATCCTCTGTAGACCTAGCTATTTTTAGCCTCCATTTAGCTGGAATCTCGTCAATCCTTGGTGCAGTAAATTTCATTTCAACAGTAATTAACATACGATCCACCGGGATCACGTTTGACCGGATACCTTTATTTGTGTGAGCTGTAGCTATCACGGCACTCTTACTTCTTCTGTCTCTCCCAGTTCTAGCAGGAGCTATCACTATACTTCTAACTGATCGAAATTTAAACACCTCATTCTTTGACCCAGCCGGAGGAGGTGACCCAATTCTTTATCAACATCTATTC
>PSFOR919-14|BC-PNEF-PSFOR0694|Hylastes angustatus|COI-5P
TACATTATATTTTATTTTTGGGGGTTGGTCAGGAATAGTGGGAACATCTTTAAGAATATTAATTCGAACAGAATTGGGCACTCCTGGTTCTTTAATTGGGGACGACCAAATTTATAATACTATAGTGACAAGTCATGCCTTCATCATAATTTTTTTTATAGTTATACCAATTATAATTGGGGGTTTCGGTAATTGATTAGTACCCTTAATATTAGGAGCCCCTGATATAGCTTTCCCTCGATTAAATAATCTAAGATTCTGATTATTACCACCTTCAATTACTTTACTATTAATAAGAAGAATTATTGATAAAGGAGTAGGAACTGGGTGAACTGTGTACCCTCCTTTAGCTTCTAATATTTCTCATGAAGGGGCTTCAGTAGATTTAGCTATTTTTAGACTCCATATAGCAGGAATCTCATCAATTTTAGGAGCTATAAATTTTATTTCAACTATTATTAATATATACCCTACAGGAATAAAACCAGACCAGCTCTCATTATTTACTTGATCCGTAAAAATTACGGCAATTTTACTTTTATTGTCTCTCCCAGTTCTTGCAGGTGCTATTACAATATTATTAACAGATCGTAATATTAATACAACATTTTTTGATCCTGCTGGTGGAGGTGACCCTATTTTATACCAACATTTATTT
>PSFOR420-13|BC-PNEF-PSFOR0392|Hylastes attenuatus|COI-5P
CACTCTATATTTTATTTTTGGGGGCTGGTCTGGGATAGTCGGAACCTCCTTAAGAATATTAATTCGTACAGAATTAGGGACCCCCGGATCTTTTATTGGGGATGACCAAATTTATAATACTATAGTCACAAGCCATGCCTTTATTATAATTTTTTTTATAGTAATGCCTATTATAATTGGAGGCTTCGGAAATTGATTAATCCCTTTAATGCTAGGGGCCCCTGATATAGCTTTCCCCCGACTTAATAATATAAGATTCTGACTACTTCCCCCATCTATTACCCTTCTTTTAATAAGAAGAATTATTAATAAAGGAGCAGGAACTGGGTGGACCGTATACCCCCCTTTAGCCTCAAATATTTCACATGAAGGGGCCTCAGTAGATCTTGCAATTTTTAGACTGCACATAGCAGGAATTTCATCAATTTTAGGAGCTATAAATTTTATTTCAACTATTATTAATATGTATCCGTCTGGAATAAAACCAGACCAACTATCATTATTCACATGATCTGTAAAAATCACAGCTATCCTCCTTCTCTTATCTTTACCAGTTCTTGCAGGAGCAATTACAATACTATTAACAGACCGTAATATCAATACAACATTTTTTGACCCCGCTGGAGGTGGAGACCCTATCTTATATCAACATTTATTT
>PSFOR410-13|BC-PNEF-PSFOR0382|Hylastes attenuatus|COI-5P
---------------------------------------------------------------------------------------------------------------------------------------------------------------------------------------------------------------------------------------------------------------------------TCCCCCATCTATTACCCTTCTTTTAATAAGAAGAATTATTAATAAAGGAGCAGGAACTGGGTGGACCGTNTNCCCCCCCTTAGCCTCAAATATTTCACATGAAGGGGCCTCAGTAGATCTTGCAATTTTTAGACTGCACATAGCAGGAATTTCATCAATTTTAGGAGCTATAAATTTTATTTCAACTATTATTAATANGTATCCGTCTGGAGTAAAACCAGACCAACTATCATTATTCACATGATCTGTAAAAATCACAGCTATTCTCCTTCTCTTATCTTTACCAGTTC-----------------------------------------------------------------------------------------------------
>PSFOR921-14|BC-PNEF-PSFOR0696|Hylastes attenuatus|COI-5P
TACTCTATATTTTATTTTTGGGGGCTGGTCTGGAATAGTCGGAACCTCCTTAAGAATATTAATTCGTACAGAATTAGGGACCCCCGGATCTTTTATTGGGGATGACCAAATTTATAATACTATAGTCACAAGCCATGCCTTTATTATAATTTTTTTTATAGTAATGCCTATTATAATTGGAGGCTTCGGAAATTGATTAATCCCTTTAATGCTAGGGGCACCTGATATGGCTTTCCCCCGACTTAATAATATAAGATTCTGGCTACTTCCCCCATCTATCACCCTTCTTTTAATAAGAAGAATTATTAATAAAGGAGCAGGAACTGGGTGGACCGTATACCCCCCTTTAGCCTCAAATATTTCACATGAAGGGGCCTCAGTAGATCTTGCAATTTTTAGACTGCACATAGCAGGAATTTCATCAATTTTAGGAGCTATAAATTTTATTTCAACTATTATTAATATGTATCCGTCTGGAATAAAACCAGACCAACTATCATTATTCACATGATCTGTAAAAATCACAGCTATTCTCCTTCTCTTATCTTTACCAGTTCTTGCAGGGGCAATTACAATATTATTAACAGACCGTAATATCAATACAACATTTTTTGACCCCGCTGGAGGTGGAGACCCTATCTTATATCAACATTTATTT
>PSFOR924-14|BC-PNEF-PSFOR0699|Hylastes barnensis|COI-5P
AACTTTATACTTTATTTTTGGAGCTTGGTCAGGAATAATTGGTACCTCATTAAGAGTTTTAATCCGTTCAGAACTAGGGACCCCTGGAAGATTAATTGGAGATGACCAATTATATAATACCCTTGTAACAAGACATGCTTTTATTATAATTTTTTTTATAGTTATACCTATTATAATTGGAGGTTTCGGAAATTGATTAATCCCTCTAATACTAGGAGCTCCTGATATAGCTTTCCCTCGATTGAATAATATAAGATTTTGATTTTTACCTCCTTCCCTAATTCTTCTTTTAATAAGTTCAATTATTGATAAGGGAGCAGGAACTGGATGAACTGTTTATCCGCCTCTAGCTTCAAATATCTCTCATGAAGGATCCTCAGTAGATCTAACTATTTTTAGACTTCACATAGCAGGTGTCTCTTCTATTTTAGGAGCCATAAATTTTATTTCAACAATTATTAATATGTATCCTTCTGGTATAAAACCAGATAGTTTAACTTTATTCACATGATCAGTAAAAATTACAGCTATTTTATTACTTTTATCCCTCCCCGTTCTTGCTGGAGCAATCACAATATTATTAACAGATCGAAATATCAACACAACTTTTTTTGACCCTTCTGGAGGGGGAGACCCCATTCTTTATCAACATTTATTT
>PSFOR920-14|BC-PNEF-PSFOR0695|Hylastes barnensis|COI-5P
AACTTTATACTTTATTTTTGGAGCTTGGTCAGGAATAATTGGTACCTCATTAAGAGTTTTAATCCGTTCAGAACTAGGGACCCCTGGAAGATTAATTGGAGATGACCAATTATATAATACCCTTGTAACAAGACATGCTTTTATTATAATTTTTTTTATAGTTATACCTATTATAATTGGAGGTTTCGGAAATTGATTAATCCCTCTAATACTAGGAGCTCCTGATATAGCTTTCCCTCGATTGAATAATATAAGATTTTGATTTTTACCTCCTTCCCTAATTCTTCTTTTAATAAGTTCAATTATTGATAAGGGAGCAGGAACTGGATGAACTGTTTATCCGCCTCTAGCTTCAAATATCTCTCATGAAGGATCCTCAGTAGATCTAACTATTTTTAGACTTCACATAGCAGGTGTCTCTTCTATTTTAGGAGCCATAAATTTTATTTCAACAATTATTAATATGTATCCTTCTGGTATAAAACCAGATAGTTTAACTTTATTCACATGATCAGTAAAAATTACAGCTATTTTATTACTTTTATCCCTCCCCGTTCTTGCTGGAGCAATCACAATATTATTAACAGATCGAAATATCAACACAACTTTTTTTGACCCTTCTGGAGGGGGAG--------------------------
>PSFOR428-13|BC-PNEF-PSFOR0400|Hylastes cunicularius|COI-5P
AACTTTATATTTTATTTTTGGGGCTTGAGCGGGAATAGTTGGAACTTCTCTAAGAATGCTAATTCGTTCAGAGCTAGGCACCCCTGGAAGGTTAATCGGAGATGATCAACTATACAATACCTTAGTAACAAGCCATGCTTTTATTATAATTTTTTTTATAGTAATACCTATCATAATTGGAGGCTTTGGAAACTGATTAATTCCTTTAATACTAGGAGCTCCTGATATAGCCTTCCCTCGCTTAAATAATATAAGATTTTGATTCCTGCCCCCTTCATTAATTCTTCTTTTAATAAGGTCAATTATTGATAAAGGAGCAGGGACTGGTTGAACGGTTTACCCCCCTCTAGCCTCAAATATCTCTCATGAGGGATCTTCGGTAGATCTAGCAATTTTCAGATTACATATGGCAGGTATTTCTTCTATTTTAGGAGCTATAAATTTTATTTCAACAATTATCAATATATACCCTTCTGGTATAAAGCCAGATAGATTAACCTTATTTACCTGATCAGTAAAAATCACAGCAATTTTACTGCTTTTATCTCTTCCCGTTCTTGCTGGAGCAATCACAATATTACTAACAGACCGAAACATCAATACAACTTTTTTTGACCCGTCCGGAGGGGGTGACCCTATTCTCTACCAGCATTTATTT
>PSFOR283-13|BC-PNEF-PSFOR0255|Hylecoetus dermestoides|COI-5P
AACACTGTATTTTATTTTTGGTGCCTGAGCAGGAATAGTTGGAACATCAATAAGAGTTTTAATTCGAATTGAGCTAGGAACCTCTGGTTCATTAATCGGAGATGATCAAATTTATAATGTTATTGTTACAGCTCATGCATTTATCATGATTTTTTTTATAGTTATGCCAATTATAATTGGAGGTTTTGGGAATTGGTTAGTACCATTAATGTTAGGAGCCCCTGATATAGCATTCCCTCGAATAAATAACATAAGATTCTGGCTTTTGCCCCCCTCTTTGACCCTCCTACTAATAAGAAGAATAGTAGAAAGAGGAGCCGGAACCGGATGAACTGTTTACCCCCCTTTATCATCTAATATCGCTCATAGCGGATCGTCAGTAGATCTTGCAATTTTTAGCCTCCATTTAGCAGGAATTTCATCTATTCTTGGTGCTGCAAATTTTATTACTACTATTATTAACATACGACCGGCAGGAATAACATTTGAACGAATACCTTTATTCGTATGGGCTGTTCTTATTACAGCTGTTTTACTCTTACTATCACTTCCTGTATTAGCAGGAGCTATTACAATACTTCTTACTGATCGAAATCTAAACACCTCCTTCTTTGACCCGGCCGGAGGAGGGGATCCTATTTTATATCAACACTTATTT
>PSFOR1020-14|PASSIFOR-NM13-040|Hylecoetus dermestoides|COI-5P
AACACTGTATTTTATTTTTGGTGCCTGAGCAGGAATAGTTGGAACATCAATAAGAGTTTTAATTCGAATTGAGCTAGGAACCTCTGGTTCATTAATCGGAGATGATCAAATTTATAATGTTATTGTTACAGCTCATGCATTTATCATGATTTTTTTTATAGTTATGCCAATTATAATTGGAGGTTTTGGGAATTGGTTAGTACCATTAATGTTAGGAGCCCCTGATATAGCATTCCCTCGAATAAATAACATAAGATTCTGGCTTTTGCCCCCCTCTTTGACCCTCCTACTAATAAGAAGAATAGTAGAAAGAGGAGCCGGAACCGGATGAACTGTTTACCCCCCTTTATCATCTAATATCGCTCATAGCGGATCGTCAGTAGATCTTGCAATTTTTAGCCTCCATTTAGCAGGAATTTCATCTATTCTTGGTGCTGCAAATTTTATTACTACTATTATTAACATACGACCGGCAGGAATAACATTTGAACGAATACCTTTATTCGTATGGGCTGTTCTTATTACAGCTGTTTTACTCTTACTATCACTTCCTGTATTAGCAGGAGCTATTACAATACTTCTTACTGATCGAAATCTAAACACCTCCTTCTTTGACCCGGCCGGAGGAGGGGATCCTATTTTATATCAACACTTATTT
>PSFOR706-13|BC-PNEF-PSFOR0583|Hylesinus crenatus|COI-5P
TACTTTATATTTTATTTTAGGAGCTTGATCTGGAATAGTCGGAACTTCTCTAAGAATAATTATTCGAACTGAACTAGGTACTCCTGGAAGATTAATTGGTAATGATCAAATCTATAACTCAATTGTAACAGCTCATGCCTTTATTATAATTTTCTTTATAGTTATACCTATTATAATTGGGGGATTTGGAAATTGATTAGTACCTCTCATACTAGGAGCACCAGATATAGCTTTTCCTCGACTAAATAATATAAGATTTTGACTTCTACCTCCTTCCCTACTATTTTTATTAATAAGAAGAATTATTGATAAAGGAGCAGGCACAGGTTGAACTGTTTATCCACCTTTAGCAAATAATATTGCCCATGAAGGAGCCTCAGTTGATTTAGCAATTTTCAGTCTTCATATAGCAGGGGTTTCCTCAATCTTAGGAGCTTTAAATTTTATTTCAACAATTATTAATATACATCCTATAGGTATAAAACTAGACCGATTAACTTTATTTACTTGAGCCGTTAAAATTACAGCAATCCTCTTACTTTTATCATTACCAGTTTTAGCGGGAGCTATCACTATACTATTAACAGACCGAAATATTAATACTTCATTTTTTGACCCTGCCGGAGGGGGCGATCCAATTCTCTATCAACATTTATTC
>PSFOR1065-14|PASSIFOR-NM13-085|Hylesinus crenatus|COI-5P
-------------------------------------------------CTAAGAATAATTATTCGAACTGAACTAGGTACTCCTGGAAGATTAATTGGTAATGATCAAATCTATAACTCAATTGTAACAGCTCATGCCTTTATTATAATTTTCTTTATAGTTATACCTATTATAATTGGGGGATTTGGAAATTGATTAGTACCTCTCATACTAGGAGCACCAGATATAGCTTTTCCTCGACTAAATAATATAAGATTTTGGCTTCTACCTCCTTCCCTACTATTTTTATTAATAAGAAGAATTATTGATAAAGGAGCAGGCACAGGTTGAACTGTTTATCCACCTTTAGCAAATAATATTGCCCATGAAGGAGCCTCAGTTGATTTAGCAATTTTCAGTCTTCATATAGCAGGGGTTTCCTCAATCTTAGGGGCTTTAAATTTTATTTCAACAATTATTAATATACATCCTATAGGTATAAAACTAGACCGATTAACTTTATTTACTTGAGCCGTTAAAATTACAGCAATCCTCTTACTTTTATCATTACCAGTTTTAGCGGGAGCTATCACTATACTATTAACAGACCGAAATATTAATACTTCATTTTTTGACCCTGCCGGAGGGGGCG--------------------------
>PSFOR456-13|BC-PASSIFOR0029|Hylesinus crenatus|COI-5P
----------------------------------------------------------------------------------------------------------------------------------------------------------------------------------------------------------------------------------------------------------------------------------------------------ATAAGAAGAATTATTGATAAAGGNNCAGGCACAGGTTGAACTGTTTATCCNCCTTTAGCAAATAATATTGCCCATGAAGGAGCCTCAGTTGATTTAGCAATTTTCAGTCTTCATATAGCAGGAGTTTCCTCAATCTTAGGAGCTTTAAATTTTATTTCAACAATTATTAATATACATCCTATAGGTATAAAACTAGACCGATTAACTTTATTTACTTGAGCCG-----------------------------------------------------------------------------------------------------------------------------------------------
>PSFOR711-13|BC-PNEF-PSFOR0588|Hylurgus miklitzi|COI-5P
TACTTTATATTTTATTTTTGGAGCTTGAGCAGGAATAGTTGGTACATCTATAAGAATTTTAATTCGTACAGAATTAGGTTTACCAGGAAGTTTAATTGGAGATGATCAAATTTATAATAGAATTGTAACAGCTCATGCTTTCATTATAATTTTCTTTATAGTTATACCTATTATAATTGGAGGATTTGGAAATTGGTTAATCCCTCTTATATTAGGAGCCCCCGATATAGCATTCCCTCGACTTAATAATATAAGTTTTTGATTATTACCTCCCTCATTGATTTTCCTCTTATTAAGAAGAATTATTGATAAAGGGGCAGGAACAGGATGAACAGTCTACCCTCCGCTAGCCTCTAATATTTCTCATGAGGGAGCTTCAGTAGATTTAGCTATTTTTAGATTACATATAGCAGGAGTATCTTCAATCTTAGGGGCTATAAATTTTATTTCTACAATCATAAATATAAATACCTATGGTATAAAATTAGACCGATTAACCCTTTTTACATGAGCAGTAAAAATCACTGCTATTTTATTGCTTTTATCTTTACCTGTTTTAGCAGGTGCAATTACTATATTATTAACAGATCGAAATATTAATACAACCTTCTTTGACCCTGCTGGAGGAGGGGATCCTATCCTTTATCAACATTTATTT
>PSFOR397-13|BC-PNEF-PSFOR0369|Hymenalia rufipes|COI-5P
AACACTTTATTTTATCTTCGGCGCATGATCAGGAATAGTAGGAACATCACTTAGCCTACTAATTCGAGCAGAACTAGGAAATCCTGGATCCTTAATTGGTGACGACCAAATTTATAATGTAATCGTAACAGCTCATGCATTTATCATAATTTTTTTTATAGTTATACCTATTATAATTGGAGGATTTGGAAATTGATTAGTCCCTCTTATACTAGGAGCACCCGATATAGCTTTTCCACGAATAAATAATATAAGATTCTGACTGCTACCCCCATCACTTACACTACTTTTAACAAGAAGAATCGTTGAAAACGGAGCAGGAACAGGATGAACAGTATACCCCCCTTTATCAGCAAACATTGCTCATGGAGGAGCATCTGTTGATTTAGCAATTTTTAGTCTTCACCTTGCAGGAATTTCTTCAATTTTAGGAGCAGCTAATTTTATTACTACAGTAATCAACATACGACCCCAAGGAATAACATTTGACCGAATACCATTATTTGTATGATCAGTTGTTATTACTGCAGTACTTCTTCTTTTATCATTGCCTGTCCTTGCAGGAGCAATTACTATACTACTTACTGACCGAAATATTAATACTTCATTCTTCGACCCAGCAGGGGGAGGAGATCCAATCCTGTACCAACATTTATTT
>PSFOR208-13|BC-PNEF-PSFOR0180|Hymenophorus doublieri|COI-5P
AACACTTTATTTTATTTTCGGAGCCTGAGCTGGAATAGTAGGAACATCTCTTAGATTACTAATCCGGGCCGAACTAGGAAACCCAGGATCGCTAATTGGAGATGACCAAATCTATAACGTTATCGTAACAGCACACGCATTCGTAATAATTTTCTTCATAGTAATACCCATCATAATTGGGGGATTTGGCAACTGATTAGTACCATTAATACTGGGTGCGCCAGATATAGCATTCCCACGTATAAACAACATAAGATTCTGACTACTCCCACCTTCACTAACCCTCCTTTTAACGAGAAGAATCGTTGAAAACGGAGCGGGTACAGGATGAACAGTATATCCACCTTTATCAGCAAATATTGCTCATAGAGGATCCTCAGTTGACCTCGCCATCTTCAGATTACATCTCGCCGGAATCTCATCAATTCTAGGAGCTGTAAACTTTATTACAACAGTAATTAATATACGGCCAAAAGGAATGTCACCTGACCGAATACCTTTATTTGTTTGAGCAGTAGTAATTACAGCAGTTCTACTACTGCTTTCGCTACCAGTATTGGCTGGTGCAATTACAATACTATTAACTGACCGTAACATCAACACTTCGTTTTTCGACCCAGCTGGAGGAGGTGACCCAATCTTGTACCAGCACTTATTC
>PSFOR883-14|BC-PASSIFOR0101|Hypoganus inunctus|COI-5P
AACATTATACTTCATCCTTGGAGCATGATCAGGAATACTAGGAACTTCCCTTAGCCTTCTAATCCGAGCTGAACTAGGAAATCCAGGATCACTAATTGGAAACGACCAAATCTACAACGTAATTGTAACCGCCCACGCCTTCATCATAATTTTCTTCATAGTTATGCCAATCATAATTGGAGGATTCGGAAACTGACTAGTACCACTAATACTAGGAGCCCCTGATATAGCATTCCCACGAATAAACAATATAAGATTCTGGTTCTTACCCCCCTCCCTTTCTCTCCTTCTAATAAGAAGAATTGTAGAAAACGGAGCAGGAACCGGATGAACAGTTTACCCTCCCCTATCCGCAAATATTGCTCACAGAGGATCATCCGTAGACCTTGCAATTTTCAGTCTTCACCTAGCAGGAATCTCATCAATTCTAGGAGCAGTTAATTTTATCTCAACAGTAATTAACATACGATCAACTGGAATCACCTTTGACCGAATACCTCTATTCGTCTGAGCAGTAGCAATCACCGCCCTATTGCTTCTTCTATCCCTACCCGTTCTTGCAGGGGCAATTACTATACTACTAACAGATCGAAATCTAAACACTTCATTCTTTGACCCAGCCGGAGGAGGTGACCCAATCCTTTATCAACATCTATTC
>PSFOR343-13|BC-PNEF-PSFOR0315|Hypoganus inunctus|COI-5P
-----------------------------------------------------------------------------------------------------------------------------------------------------------------------------------------------------------------------------------------------------------TAAGATTCTGGTTCTTACCCCCCTCCCTTTCTCTCCTTCTAATAAGAAGAATTGTAGAAAACGGAGCAGGAACCGGATGAACAGTTTACCCTCCCCTATCCGCAAATATTGCTCACAGAGGATCATCCGTAGACCTTGCAATTTTCAGTCTTCACCTAGCAGGAATCTCATCAATTCTAGGAGCAGTTAATTTTATCTCAACAGTAATTAACATACGATCAACTGGAATCACCTTTGACCGAATACCTCTATTCGTCTGAGCAGTAGCAATCACCGCCCTATTGCTTCTTCTATCCCTACCCGTTCTTGCAGGGGCAATTACTATACTACTAACAGATCGAAATCTAAACACTTCATTC------------------------------------------------
>PSFOR753-13|BC-PNEF-PSFOR0630|Hypoganus inunctus|COI-5P
------------------------------------------------------------------------------------------------------------------------------------------------------------------------------------------------------------------------------------------------------CAATATAAGATTCTGGTTCTTACCCCCCTCCCTTTCTCTCCTTCTAATAAGAAGAATTGTAGAAAACGGAGCAGGAACCGGATGAACAGTTTACCCTCCCCTATCCGCAAATATTGCTCACAGAGGATCATCCGTAGACCTTGCAATTTTCAGTCTTCACCTAGCAGGAATCTCATCAATTCTAGGAGCAGTTAATTTTATCTCAACAGTAATTAACATACGATCAACTGGAATCACCTTTGACCGAATACCTCTATTCGTCTGAGCAGTAGCAATCACCGCCCTATTGCTTCTTCTATCCCTACCCGTTCTTGCAGGGGCAATTACTATACTACTAACAGATCGAAATCTAAACACTTCATTCTTTGACCCAGCCGGAGGAGGTGACCCAATCCTTTATCAACATCTATTC
>PSFOR1021-14|PASSIFOR-NM13-041|Hypulus quercinus|COI-5P
AACTTTATATTTTATTTTTGGCGCATGAGCAGGGATAATTGGAACTTCATTAAGACTCCTAATTCGAGCTGAATTAGGAAACCCCGGGTCTTTAATTGGAGATGATCAAATTTATAATGTTATCGTAACTGCCCATGCTTTTATTATAATTTTTTTCATAGTTATACCTATTATAATAGGTGGATTTGGGAATTGATTAATGCCTTTAATATTGGGAGCCCCTGATATAGCGTTTCCTCGAATAAATAATATAAGATTTTGGTTATTACCCCCCTCTTTAACCTTGTTATTAATAAGAAGAATTGTCGAAAATGGAGCAGGAACAGGATGAACAGTATACCCCCCACTTTCATCTAATATTGCCCATAGAGGATCTTCCGTAGATATAGCAATTTTTAGACTTCATCTTGCTGGTATCTCATCTATTTTAGGAGCTATTAATTTTATTACAACAGTAATTAATATACGATCAATTGGTATAACATTTGATCGAATACCTCTTTTCGTTTGAGCTATTATAATTACAGCAATTCTTTTACTTCTTTCTTTACCAGTTTTAGCTGGAGCTATTACTATACTTCTTACTGATCGAAATTTAAATACATCTTTTTTTGACCCAGCAAGTGGTGGTGACCCTATTTTATATCAACACTTATTC
>PSFOR261-13|BC-PNEF-PSFOR0233|Hypulus quercinus|COI-5P
AACTTTATATTTTATTTTTGGCGCATGAGCAGGGATAATTGGAACTTCATTAAGACTCCTAATTCGAGCTGAATTAGGAAACCCCGGGTCTTTAATTGGAGATGATCAAATTTATAATGTTATCGTAACTGCCCATGCTTTTATTATAATTTTTTTCATAGTTATACCTATTATAATAGGTGGATTTGGGAATTGATTAATGCCTTTAATATTGGGAGCCCCTGATATAGCGTTTCCTCGAATAAATAATATAAGATTTTGGTTATTACCCCCCTCTTTAACCTTGTTATTAATAAGAAGAATTGTCGAAAATGGAGCAGGAACAGGATGAACAGTATACCCCCCACTTTCATCTAATATTGCCCATAGAGGATCTTCCGTAGATATAGCAATTTTTAGACTTCATCTTGCTGGTATCTCATCTATTTTAGGAGCTATTAATTTTATTACAACAGTAATTAATATACGATCAATTGGTATAACATTTGATCGAATACCTCTTTTCGTTTGAGCTATTATAATTACAGCAATTCTTTTACTTCTTTCTTTACCAGTTTTAGCTGGAGCTATTACTATACTTCTTACTGATCGAAATTTAAATACATCTTTTTTTGACCCAGCAAGTGGTGGTGACCCTATTTTATATCAACACTTATTC
>PSFOR772-13|BC-PNEF-PSFOR0649|Idolus picipennis|COI-5P
TACACTATACTTCATTTTTGGTGCTTGAGCAGGAATGCTAGGAACATCATTAAGACTATTAATTCGTGCTGAATTAGGTAACCCAGGATCATTAATTGGAAACGACCAAATCTATAATGTTATTGTAACAGCACATGCATTTATTATAATTTTCTTTATAGTTATACCTATCATAATTGGGGGATTTGGTAACTGACTAGTTCCATTAATACTAGGAGCCCCAGATATAGCATTTCCACGAATAAATAACATAAGATTCTGATTTCTCCCTCCTTCATTATCCCTTCTCCTAATAAGAAGAATTGTAGAAAACGGAGCAGGAACAGGTTGAACAGTTTACCCTCCCTTATCAGCAAATATTGCTCATAGAGGATCATCAGTTGATCTAGCAATTTTTAGTTTACATCTAGCAGGAATTTCATCCATCCTTGGAGCCGTAAATTTTATTTCAACAGTAATCAATATACGATCAACTGGAATCACATTTGACCGAATGCCTCTATTTGTATGAGCAGTAGCAATTACTGCCCTTCTATTATTATTATCTCTACCAGTATTAGCAGGAGCTATTACAATACTATTGACAGATCGAAATTTAAACACATCATTCTTTGACCCAGCAGGAGGAGGAGACCCAATTCTTTACCAACATTTATTT
>PSFOR708-13|BC-PNEF-PSFOR0585|Ips typographus|COI-5P
-----------------------------------------------------------------------------------------------------------------------------------------------------------------------------------------------------------------------------------------------------------TAAGATTTTGACTTCTACCTCCATCCTTAGCTCTTTTAATTATAAGAAGAATTGTAGACAAAGGGGCTGGTACTGGTTGAACAGTATACCCACCTTTATCAGCCAATATTGCCCATGAAGGAACTTCAGTAGACTTGGCAATTTTTAGCTTACATATATCAGGAGTTTCTTCAATTCTAGGAGCTATTAATTTTATTTCTACAATTATTAATATACATCCAAAAGGAGTAACCCCCGAACAACTTACCTTATTTACATGAGCAGTAAAAATTACAGCAGTTCTTCTCCTTTTATCTTTACCAGTACTTGCTGGAGCAATTACTATATTGCTCACAGATCGAAATATTAATACATCATTCTTTGACCCAGCTGGTGGAGGAGATCCTATTCTTTACCAACATCTATTT
>PSFOR754-13|BC-PNEF-PSFOR0631|Ischnodes sanguinicollis|COI-5P
-----------------------------------------------------------------------------------------------------------------------------------------------------------------------------------------------------------------------------------------------------------TAAGATTTTGATTACTTCCCCCATCCTTATCACTCCTACTAATAAGGAGAATTGTAGAGAGAGGAGCAGGAACTGGATGAACAGTATATCCCCCCCTATCTGCTAACATTGCACACAGAGGATCCTCGGTAGACTTAGCTATTTTTAGCCTGCATTTAGCAGGAATCTCTTCAATTTTAGGGGCTGTAAACTTCATTTCAACTGTAATTAATATACGATCAACTGGAATTTCTTTTGATCGAATACCACTGTTTGTTTGAGCAGTTGCAATTACTGCTCTTCTTCTCTTACTTTCTCTACCAGTATTGGCAGGAGCAATCACTATATTATTAACAGATCGAAACTTAAATACTACCTTCTTTGACCCAGCAGGAGG-------------------------------
>PSFOR965-14|BC-PSFOR-JD0119|Ischnodes sanguinicollis|COI-5P
AACTCTTTACTTTATTTTTGGTGCATGAGCAGGAATGCTAGGAACATCACTAAGCCTCCTAATTCGAGCTGAACTAGGCAACCCAGGAGCATTAATTGGGAACGACCAAATTTACAATGTTATTGTAACAGCCCACGCCTTTGTTATAATTTTTTTTATAGTTATACCAATCATAATTGGAGGATTTGGAAACTGATTAGTCCCATTAATATTGGGAGCCCCCGATATAGCCTTCCCTCGAATAAATAACATAAGATTTTGATTACTTCCCCCATCCTTNTCACTCCTACTAATAAGGAGAATTGTAGAGAGAGGAGCAGGAACTGGATGAACAGTATATCCCCCCCTATCTGCTAACATTGCACACAGAGGATCCTCGGTAGACTTAGCTATTTTTAGCCTGCATTTAGCAGGAATCTCTTCAATTTTAGGGGCTGTAAACTTCATTTCAACTGTAATTAATATACGATCAACTGGAATTTCTTTTGATCGAATACCACTGTTTGTTTGAGCAGTTGCAATTACTGCTCTTCTTCTCTTACTTTCTCTACCAGTATTGGCAGGAGCAATCACTATATTATTAACAGATCGAAACTTAAATACTACCTTCTTTG--------------------------------------------
>PSFOR982-14|PASSIFOR-NM13-002|Ischnomera caerulea|COI-5P
AACTCTTTATTTAATTTTCGGAGCATGAGCAGGAATAGTAGGAACTTCTTTAAGCCTCTTAATCCGAACAGAACTTGGAAACCCTGGATCCTTAATTGGTGACGATCAAATTTACAATGTTATCGTCACAGCTCACGCTTTTATTATAATTTTCTTTATGGTTATACCTATCATAATTGGAGGATTTGGAAATTGATTAGTCCCTCTAATACTAAGAGCACCAGATATAGCTTTTCCTCGAATAAATAATATAAGGTTTTGATTGCTTCCCCCATCATTAACTTTATTAATTATAAGAAGAATCGTCGAAAATGGAGCTGGTACTGGGTGAACTGTTTACCCCCCTCTTTCATCTAATATTGCTCATAGTGGATCCTCAGTAGATCTAGCAATTTTTAGTCTTCATTTAGCTGGAATTTCTTCTATTTTAGGAGCAGTAAATTTTATTACTACTGTTATTAACATACGACCAACAGGTATATCCCTCGATCGAATACCCCTATTTGTTTGAGCTGTTGTAATCACTGCAATTCTTCTCCTTTTATCTCTCCCAGTACTTGCTGGAGCAATTACTATACTCCTAACTGATCGAAATTTAAATACCTCATTTTTTGATCCAGCTGGAGGAGGAGACCCAATTTTATACCAACATTTATTT
>PSFOR655-13|BC-PNEF-PSFOR0532|Ischnomera cyanea|COI-5P
-----------------------------------------------------------------------------------------------------------------------------------------------------------------------------------------------------------------------------------------------------------TAAGATTTTGATTGCTTCCCCCATCATTAACTTTATTAATTATAAGAAGAATTGTCGAAAATGGTGCTGGTACTGGGTGAACAGTTTACCCCCCTCTTTCATCTAATATTGCTCATAGTGGATCCTCAGTAGACTTAGCAATTTTTAGTTTACATTTGGCAGGAATTTCCTCCATTTTAGGAGCAGTAAATTTCATTACTACAGTAATTAACATACGACCAACAGGTATATCTCTAGATCGAATACCTTTATTTGTCTGAGCTGTTGTAATTACTGCTATTCTTCTTCTCCTCTCTCTCCCAGTTCTTGCTGGAGCAATTACTATACTTTTAACTGACCGGAATTTAAATACATCATTTTTTGACCCGGCTGGAGGAGGAG--------------------------
>PSFOR1067-14|PASSIFOR-NM13-087|Ischnomera cyanea|COI-5P
AACTCTTTATTTAATTTTTGGAGCATGAGCAGGAATAGTTGGAACTTCCTTGAGTCTCTTAATCCGAACTGAACTTGGAAATCCTGGATCTTTAATTGGTGACGATCAAATTTATAATGTTATCGTCACAGCTCATGCTTTTATTATAATTTTTTTTATAGTTATACCTATCATAATTGGAGGATTCGGAAACTGATTAGTTCCTCTAATATTAAGAGCACCAGATATAGCCTTTCCTCGAATAAATAATATAAGATTTTGATTGCTTCCCCCATCATTAACTTTATTAATTATAAGAAGAATTGTCGAAAATGGTGCTGGTACTGGGTGAACAGTTTACCCCCCTCTTTCATCTAATATTGCTCATAGTGGATCCTCAGTAGACTTAGCAATTTTTAGTTTACATTTGGCAGGAATTTCCTCCATTTTAGGAGCAGTAAATTTCATTACTACAGTAATTAACATACGACCAACAGGTATATCTCTAGATCGAATACCTTTATTTGTCTGAGCTGTTGTAATTACTGCTATTCTTCTTCTCCTCTCTCTCCCAGTTCTTGCTGGAGCAATTACTATACTTT-----------------------------------------------------------------------------
>PSFOR315-13|BC-PNEF-PSFOR0287|Isorhipis marmottani|COI-5P
CACCTTGTATTTCATTTTCGGAGCTTGATCAGGAATAGGGGGTACAGCTTTAAGCCTATTAATTCGAGCAGAATTGGGTACTCCCAATGCTTTAATCGGAAATGATCAAATTTACAATGTAATTGTCACAGCCCATGCTTTCATCATAATTTTTTTTATAGTAATACCTATTATAATAGGAGGATTTGGCAATTGATTAGTCCCCCTAATGCTAAGAGCCCCGGATATGGCATTCCCTCGAATAAATAACATAAGATTCTGATTACTCCCACCTTCATTATGCCTTCTATTAATAAGAAGAATAGTTGAAAGAGGGGCTGGTACAGGGTGAACTGTTTACCCCCCCCTATCTTCTAATATTGCCCACAGAGGGTCCTCAGTTGATCTAGCAATTTTTAGATTACACTTAGCAGGTATTTCCTCCATTTTAGGAGCAATTAACTTTATTACTACTGTAATCAATATGCGCCCAAATAATATGACCCTAGATAAAGCCCCTTTATTTGTCTGATCAATTAGATTAACTGCAATTTTACTTTTATTATCTTTGCCAGTTCTTGCAGGAGCCATCACTATATTATTAACAGATCGTAATTTAAATACCTCCTTTTTTGACCCTGCCGGAGGAGGTGACCCTATTTTATATCAGCATTTATTT
>PSFOR1010-14|PASSIFOR-NM13-030|Isorhipis melasoides|COI-5P
TACCTTATACTTTATTTTTGGAGCTTGAGCAGGAATAGTAGGAACAGCTTTAAGCCTACTAATTCGAGCTGAATTAGGCACCCCTAGTGCCTTAATTGGAAATGACCAAATTTATAATGTAATTGTTACAGCCCATGCTTTTATTATAATTTTTTTTATAGTAATACCTGTTATAATAGGAGGATTTGGAAATTGATTAGTTCCTTTAATGCTAAGAGCCCCAGATATAGCATTTCCCCGAATAAATAATATGAGATTCTGATTACTTCCTCCTTCATTATGCCTTCTTTTAATAAGAAGAATAGTAGAAAGAGGAGCTGGAACAGGGTGAACTGTTTACCCCCCTCTATCTTCAAATATCGCCCATAGAGGGTCTTCGGTAGATTTAGCAATCTTTAGATTACATTTAGCTGGTATTTCTTCTATTTTAGGAGCAATTAATTTTATTACTACCGTTATTAATATGCGCCCAAATAGAATAACTTTAGATAAGGCTCCTTTATTTGTATGAGGAGTTACATTAACAGCAATTTTATTGTTATTATCCTTACCTGTTTTAGCAGGAGCTATTACTATACTATTAACAGATCGTAATCTTAATACTTCATTTTTTGACCCCGCCGGAGGGGGAGATCCAATTTTATACCAACATTTATTT
>PSFOR417-13|BC-PNEF-PSFOR0389|Kissophagus hederae|COI-5P
-------------------------------GGTATACTTGGTACCTCTCTAAGAATATTAATCCGAATAGAATTAGGAACCCCCGGGAGTTTAATTGGTAATGATCAAATTTATAACTCTATTGTTACAGCTCATGCTTTTATTATAATTTTTTTTATAGTTATACCAATTATAATTGGTGGATTTGGAAACTGATTAGTACCCCTTATACTAGGAGCCCCTGATATAGCTTTTCCACGATTAAATAATATAAGATTTTGATTTTTACCACCCTCATTAATACTTCTACTAATAAGAAGAATCATTGACAAAGGAGCTGGAACAGGCTGAACAGTTTATCCCCCTCTGGCCAGAAATATTGCTCATGAAGGAGCATCTGTTGATTTAGCAATTTTTAGACTCCATATAGCAGGAGTATCATCTATTCTCGGAGCTATTAACTTTATCTCAACAATTATTAATATAAATCCTAAAGGAATAAGAATAAACCGACTAACTCTTTTTATTTGAGCAGTCCAAATTACTGCCATTTTACTTCTTATTTCATTACCAGTACTTGCAGGAGCAATCACTATACTTTTAACAGATCGAAATATTAATACTTCATTCTTTGACCCCGCAGGAGGAGGAGATCCAATTCTCTATCAACATTTATTT
>PSFOR755-13|BC-PNEF-PSFOR0632|Lacon punctatus|COI-5P
AACCTTATATTTTTTATTCGGAGCATGAGCTGGAATACTAGGAACTTCCTTAAGATTACTAATTCGAGCGGAACTAGGAAACCCTGGCTCACTAATCGGAAACGATCAAATCTACAACGTAGTTGTAACCGCACATGCATTCATTATAATTTTCTTCATGGTAATACCAGTAATAATTGGAGGATTCGGTAATTGACTAGTCCCTTTAATACTAGGAGCCCCTGATATAGCATTTCCACGAATAAACAATATAAGATTTTGACTTTTACCTCCCTCTTTATCTTTACTTTTAATAAGAAGAATTGTTGAAAACGGAGCAGGAACAGGATGAACAGTTTATCCCCCCCTATCAGCCAACATCGCCCATAGAGGTTCATCAGTAGACCTAGCCATTTTCAGACTTCATTTAGCAGGAATCTCATCAATTCTAGGCGCTGTAAATTTTATTTCCACTGTTATTAACATGCGATCAACAGGTATAACATTCGATCGTATACCTCTTTTCGTATGAGCAGTTGCAATTACCGCTCTTCTTCTACTACTATCTCTTCCTGTTCTAGCAGGCGCTATCACCATACTATTAACAGATCGAAATCTAAATACTACATTCTTTGACCCAGCAGGTGGAGGAGATCCAATTTTATACCAACATTTATTT
>PSFOR756-13|BC-PNEF-PSFOR0633|Lacon querceus|COI-5P
--------------------------------------------------------------------------------------------------------------------------------------------------------------------------------------------------------------------------------------------------------------------------------------TCTCCCTTCTTCTAATAAGAAGAATTGTAGAAAACGGAGCAGGTACAGGATGAACAGTTTATCCTCCCCTATCAGCTAACATTGCTCACAGAGGATCATCTGTTGATCTAGCAATTTTTAGACTTCATCTAGCAGGAATCTCCTCAATTTTAGGAGCAGTTAATTTTATCTCAACTGTCATTAATATACGATCAACAGGAATGTCTTTTGATCGAATACCGCTATTTGTATGAGCAGTAGTAATTACCGCCCTCTTACTTCTTCTGTCATTACCAGTTCTAGCCGGAGCAATTACAATATTACTAACAGACCGAAATCTCAATACTTCATTTTTCGACCCGGCCGGAGG-------------------------------
>PSFOR459-13|BC-PASSIFOR0032|Laemophloeus monilis|COI-5P
-----------------------------------------------------------------------------------------------------------------------------------------------------------------------------------------------------------------------------------------------------------TAAGATTTTGACTCCTTCCACCTTCTCTCTCTCTTCTTTTAATAAGAAGAATTGTTGAAAAAGGTGCTGGAACAGGATGAACTGTTTATCCACCCCTATCTTCTAATATCGCCCATGGAGGATCTTCTGTAGATTTAGCAATCTTCAGATTACACATGGCAGGTATTTCTTCAATCTTAGGCGCTGTAAATTTCATTTCTACAGTTATTAATATACGACCAGAAGGAATAACTCTTGAACGAATACCCCTTTTCGTTTGAGCAGTTATTATTACTGCCGTACTATTATTACTTTCTCTACCAGTTTTAGCTGGTGCTATTACTATACTTTTAACTGACCGTAATATTAATACTTCTTTTTTCGACCCCGCGGGGGGAGGTGACCCCATTCTTTATCAACACTTATTT
>PSFOR586-13|BC-PNEF-PSFOR0463|Latipalpis plana|COI-5P
-----------------TCGGAGCATGATCCGGAATAGTTGGAACCGCTCTTAGATTACTAATTCGTGCAGAACTGGGAAATCCAGGTGCACTTATTGGAGATGACCAGATTTATAATGTTATTGTAACAGCCCACGCTTTCGTTATAATTTTCTTTATAGTTATACCAGTCATGATAGGAGGATTTGGAAACTGATTAGTCCCATTAATACTAGGTGCCCCAGACATAGCATTTCCACGAATAAACAACATAAGATTTTGACTTCTTCCGCCATCTTTAACTCTTCTACTAACAAGAAGAATTGTTGAAAATGGTGCAGGAACAGGATGAACCGTCTATCCCCCTCTAGCCGCCAACGTCGCCCACAGAGGAGCATCCGTAGATTTAGCAATTTTTAGTCTTCACTTAGCTGGAATTTCATCAATCTTAGGAGCAGTAAATTTTATTACAACAGTAATTAACATACGTTCAACAGGAATAACATTTGACCGAATACCTCTATTTGTATGATCAGTAGCAATTACAGCTCTATTACTCTTGCTATCCCTTCCTGTTCTAGCAGGAGCTATTACTATACTATTAACGGATCGAAATCTTAATACATCATTTTTCGATCCAGCAGGAGGAGGTGACCCAATTCTTTATCAACATTTATTT
>PSFOR057-13|BC-PNEF-PSFOR0029|Leptura aurulenta|COI-5P
AACTTTATACTTTATTTTTGGGGCTTGAGCAGGCATAGTTGGTACTTCATTAAGACTTTTAATTCGATCAGAATTAGGTAACCCTGGATCATTAATTGGAGATGATCAAATTTATAATGTAATTGTTACAGCTCATGCATTTGTAATAATTTTTTTTATAGTAATACCAATTATAATTGGAGGATTTGGAAATTGATTAGTTCCTTTAATATTAGGTGCTCCTGATATAGCATTTCCACGAATAAATAATATAAGGTTTTGATTATTACCACCTTCACTTACACTTTTAATTATAAGAAGAGTAGTAGAAAGGGGAGCAGGAACAGGATGAACAGTTTATCCACCTTTATCTTCTAATATTGCTCATGGTGGATCTTCAGTTGATTTAGCTATTTTTAGTTTACATTTAGCTGGAATTTCTTCAATTCTAGGTGCTGTAAATTTTATTACTACAGTTATTAATATACGACCTTTAGGAATAAGACCAGATCGAATACCACTTTTTGTTTGAGCAGTTGTAATTACAGCTGTTCTTTTATTACTATCATTACCTGTTTTAGCTGGCGCAATTACAATATTACTTACAGATCGTAATCTTAATACTTCTTTTTTTGATCCGGCTGGAGGAGGAGATCCAATTTTATATCAACACTTATTT
>PSFOR059-13|BC-PNEF-PSFOR0031|Leptura quadrifasciata|COI-5P
AACATTATATTTCATTTTTGGAGCCTGGGCAGGCATAGTAGGAACATCACTAAGACTTTTAATTCGATCAGAACTTGGCAATCCTGGATCATTAATCGGTGATGATCAAATTTATAATGTAATTGTTACAGCTCATGCATTTGTAATAATTTTTTTTATAGTTATACCTATTATAATTGGAGGATTTGGAAATTGATTAGTTCCTTTAATATTGGGTGCCCCTGATATAGCATTTCCACGAATAAATAATATAAGATTTTGATTATTACCACCTTCACTTACACTTTTAATTATAAGAAGATTAGTAGAAAGAGGAGCAGGGACAGGATGAACTGTTTACCCTCCTCTATCTTCTAACATCGCTCATGGAGGATCTTCAGTTGATTTAGCTATTTTTAGTCTTCATTTAGCTGGAATTTCTTCAATTTTAGGAGCTGTAAATTTTATTACTACAGTTATTAATATACGACCTTTAGGCATAAGACCGGATCAAATACCACTTTTTGTTTGAGCAGTTGTAATTACAGCTATCCTTTTATTATTATCACTGCCTGTTTTAGCAGGAGCTATTACAATATTACTTACAGATCGAAATTTAAATACTTCCTTTTTTGACCCAGCCGGAGGAGGAGACCCAATTTTATACCAACATTTATTT
>PSFOR060-13|BC-PNEF-PSFOR0032|Lepturobosca virens|COI-5P
AACATTATATTTTATTTTTGGAGCTTGAGCTGGAATAATCGGGACTTCTCTTAGATTATTAATTCGTTCTGAATTAGGAAACCCTGGATCATTAATTGGAGATGATCAAATTTATAATGTAATTGTTACAGCTCACGCATTTGTTATAATTTTTTTCATAGTAATACCAATTATAATTGGAGGATTTGGAAATTGATTAGTCCCTTTAATACTAGGTGCCCCAGACATAGCTTTCCCTCGAATAAATAATATAAGATTTTGATTACTCCCACCTTCACTAACTTTATTAATTATAAGAAGAATTGTAGAAAAAGGAGCTGGGACTGGTTGAACAGTTTACCCGCCTTTAGCAGCTAATATCGCCCACAGAGGGCCATCAGTTGATTTAGCAATTTTCAGTTTACATCTCGCTGGTATTTCTTCAATTTTAGGTGCTGTAAATTTTATTACTACAATTATTAACATACCTCCAGTCGGTATAAAATTGGACCAAATACCTCTTTTCGTTTGAGCTGTTATAATCACAGCTATTTTACTATTACTATCTCTCCCTGTTTTAGCTGGTGCTATCACCATACTACTAACAGACCGAAATTTAAATACATCCTTTTTTGACCCGGCAGGTGGGGGAGACCCAATTTTATACCAACACTTATTC
>PSFOR778-13|BC-PNEF-PSFOR0655|Lissodema cursor|COI-5P
AACATTATATTTTATTTTTGGGGCTTGAGCTGGTATAATTGGTACATCTTTAAGACTATTAATTCGAACAGAGCTGGGAAATCCAGGATCATTAATTGGAGATGATCAAATTTATAATGTAATTGTAACTGCTCATGCATTTATTATAATTTTTTTTATAGTTATACCAGTTATAATAGGAGGATTTGGAAATTGATTAATTCCTTTAATATTAGGAGCTCCTGATATAGCGTTTCCTCGTATAAATAATATAAGATTTTGACTTTTACCTCCATCATTAACTTTACTCACTATAAGAAGAATAGTTGAAAAGGGGGCGGGTACAGGATGAACTGTTTATCCACCTTTAGCCTCTAATATTGCACATAGAGGATCGTCAGTAGATCTAGCAATTTTTAGGCTTCACTTAGCAGGAATCTCTTCAATTTTAGGTGCAGTAAATTTTATTACTACTATAATTAATATACGACCAGTAGGTATAAGATTCGATCGTATACCCTTATTTGCTTGAGCAGTATTAATTACTGCTATCCTCCTACTTTTATCATTACCCGTTCTAGCAGGGGCAATTACAATATTATTAACTGACCGAAACTTAAATACATCTTTTTTTGACCCTGCTGGTGGAGGAGATCCTATTTTATATCAACATTTATTT
>PSFOR1026-14|PASSIFOR-NM13-046|Lissodema cursor|COI-5P
AACATTATATTTTATTTTTGGAGCTTGAGCTGGTATAATTGGTACATCTTTAAGACTATTAATTCGAACTGAGCTAGGAAATCCTGGATCATTAATCGGAGACGATCAAATTTATAATGTAATTGTAACTGCTCATGCATTTATTATAATTTTTTTTATAGTTATACCAGTTATAATAGGAGGATTTGGAAATTGATTAATTCCTTTAATATTAGGAGCTCCTGATATAGCGTTTCCTCGTATAAATAATATAAGATTTTGACTTTTACCTCCATCATTAACTTTACTCACTATAAGAAGGATAGTTGAAAAAGGAGCGGGTACAGGATGAACTGTTTACCCGCCTTTAGCCTCTAATATTGCACATAGAGGATCGTCGGTAGATCTAGCAATTTTTAGGCTTCACTTAGCAGGAATCTCTTCAATTTTAGGTGCAGTAAATTTTATTACTACTATAATTAATATACGACCAGTAGGTATAAGATTTGATCGTATGCCCTTATTTGCTTGAGCAGTATTAATTACTGCTATTCTCTTACTTTTATCATTACCCGTTCTAGCAGGGGCAATTACAATATTATTAACTGATCGAAACTTAAATACATCTTTTTTTGACCCTGCTGGTGGAGGAGATCCAATTTTATATCAACATTTATTT
>PSFOR780-13|BC-PNEF-PSFOR0657|Lissodema lituratum|COI-5P
TTCTTTATATTTTATTTTTGGTTCTTGGGCAGGAATAGTAGGAACTTCTTTAAGTCTTTTAATTCGAGCAGAATTAGGAAATCCTGGTTCCTTAATTGGTGATGATCAAATTTATAATGTTATTGTTACAGCACATGCTTTTATTATAATTTTTTTTATAGTTATACCCATTATAATTGGTGGATTTGGAAATTGATTAGTTCCTCTAATATTAGGAGCTCCTGATATAGCATTCCCTCGAATAAATAATATAAGATTCTGGTTATTACCCCCTTCTTTAACTCTCCTAATTATAAGAAGAATCGTAGAAAATGGGGCTGGGACTGGTTGAACAGTTTATCCCCCATTAGCAGCTAATATCGCTCATAGAGGATCTTCAGTTGATTTAGCAATTTTTAGTCTTCATTTAGCTGGTGTCTCTTCTATTTTAGGTGCAGCAAATTTTATCACTACAGTTATTAATATACGACCAATAGGAATAACATTAGATCGAATACCCTTATTTGTTTGGGCTGTAGTAATTACTGCAATTCTTTTACTTTTATCATTACCAGTTCTTGCTGGTGCAATTACAATACTTTTAACTGATCGAAATTTAAACACATCTTTTTTTGATCCTGCCGGAGGGGGGGATCCCATTCTTTACCAGCATTTATTT
>PSFOR183-13|BC-PNEF-PSFOR0155|Litargus balteatus|COI-5P
AACTTTATATTTTATTTTTGGAGCATGAGCTGGTATAGTAGGAACTTCACTAAGAATTTTAATCCGCTCCGAACTTGGAAACCCCGGATCCTTAATTGGAGATGACCAAATTTATAACGTAATCGTTACTGCTCATGCTTTTATTATAATTTTTTTTATAGTAATACCTATTATGATAGGAGGATTTGGAAATTGATTAGTTCCTTTAATACTAGGCGCCCCTGATATAGCCTTTCCTCGAATAAATAATATAAGATTTTGACTTTTACCCCCCTCTCTGACTCTACTTATTATAAGAAGAATCGTAGAAAATGGAGCAGGCACCGGATGAACAGTGTATCCCCCACTTTCTTCCAATATTGCCCATAGTGGATCTTCTGTTGATTTGGCTATTTTTAGACTTCATTTAGCTGGAATTTCTTCAATCTTAGGAGCTGTAAATTTTATCACTACTGTTATTAATATACGTCCTAGAGGAATAACATTTGATCGTATACCTTTATTTGTTTGAGCAGTAGCTATTACAGCCCTTTTACTTTTACTTTCCTTACCTGTTTTAGCAGGAGCTATTACTATACTTTTAACTGACCGAAATTTAAATACTTCCTTTTTCGACCCCGCCGGAGGAGGAGACCCAATTTTATACCAACATTTATTT
>PSFOR457-13|BC-PASSIFOR0030|Litargus connexus|COI-5P
------------------------------------AGTAGGAACTTCTTTAAGAATATTAATTCGATCAGAATTAGGAAATCCTGGATCATTAATTGGTGATGACCAAATTTATAATGTAATCGTAACTGCTCATGCATTTATTATAATTTTCTTTATAGTTATACCTATTATAATAGGAGGATTTGGAAATTGATTAGTCCCACTAATATTAGGAGCCCCTGATATAGCTTTTCCTCGAATAAATAATATAAGATTTTGACTTTTACCCCCTTCTTTAACTCTTTTAATTATAAGAAGAGTAGTTGAAAGAGGTGCAGGTACTGGCTGAACCGTCTATCCCCCTTTATCCTCAAATATTGCCCATAGAGGATCTTCGGTAGATTTAGCAATTTTTAGCCTTCACCTAGCAGGAATCTCTTCAATTTTAGGAGCAGTAAATTTTATTACAACTGTAATTAATATACGACCAAGAGGTATAAGATTTGACCGTATACCATTATTTGTATGAGCTGTAGCTATTACAGCACTTTTATTGTTACTATCATTACCGGTTTTAGCAGGAGCAATCACTATATTATTAACAGATCGAAATTTAAATACATCCTTTTTTGACCCTGCTGGAGGAGGAGATCCAATTTTATACCAACATTTATTC
>PSFOR257-13|BC-PNEF-PSFOR0229|Lucanus cervus|COI-5P
AACTTTATACTTTCTTTTAGGCAGATGATCTGGTATAGTTGGAACCTCCTTAAGAATCTTAATTCGTACTGAATTAGGGAACCCTGGATCCTTAATTGGAGATGATCAAATTTATAATGTTATTGTTACTGCCCATGCATTCATTATAATTTTTTTTATAGTTATACCTATCATAATTGGGGGTTTTGGGAATTGATTAATTCCTTTAATACTTGGAGCCCCTGACATGGCCTTTCCTCGAATAAATAATATAAGATTTTGATTATTACCTCCATCCTTAACATTTCTTCTTATAAGAAGAATAATTGAAAGAGGCGCTGGAACTGGATGAACAGTCTACCCTCCCTTATCATCAAATATTGCCCACAGAGGGGCATCTGTAGATCTTGCTATTTTCAGTCTCCATTTAGCAGGAATCTCATCTATTCTTGGTGCAGTCAATTTTATTACCACTGTAATTAACATGCGAGCAATAGGAATTACTTTTGATCGAATACCCTTATTTGTGTGAGCTGTAGTCTTAACAGCAGTCCTCCTGCTCCTTTCTCTTCCTGTATTAGCAGGAGCTATCACCATACTCTTAACAGACCGAAATCTTAACACAACCTTTTTTGATCCAGCTGGTGGGGGAGACCCTATCTTATACCAACACTTATTT
>PSFOR258-13|BC-PNEF-PSFOR0230|Lucanus cervus fabiani|COI-5P
AACTTTATACTTTCTTTTAGGCAGATGATCTGGTATAGTTGGAACCTCCTTAAGAATCTTAATTCGTACTGAATTAGGGAACCCTGGATCCTTAATTGGAGATGATCAAATTTATAATGTTATTGTTACTGCCCATGCATTCATTATAATTTTTTTTATAGTTATACCTATCATAATTGGGGGTTTTGGGAATTGATTAATTCCTTTAATACTTGGAGCCCCTGACATGGCCTTTCCTCGAATAAATAATATAAGATTTTGATTATTACCTCCATCCTTAACATTTCTTCTTATAAGAAGAATAATTGAAAGAGGCGCTGGAACTGGATGAACAGTCTACCCTCCCTTATCATCAAATATTGCCCACAGAGGGGCATCTGTAGATCTTGCTATTTTCAGTCTCCATTTAGCAGGAATCTCATCTATTCTTGGTGCAGTCAATTTTATTACCACTGTAATTAACATGCGAGCAATAGGAATTACTTTTGATCGAATACCCTTATTTGTGTGAGCTGTAGTCTTAACAGCAGTCCTCCTGCTCCTTTCTCTTCCTGTATTAGCAGGAGCTATCACCATACTCTTAACAGACCGAAATCTTAACACAACCTTTTTTGATCCAGCTGGTGGGGGAGACCCTATCTTATACCAACACTTATTT
>PSFOR1022-14|PASSIFOR-NM13-042|Lygistopterus sanguineus|COI-5P
AACATTATACTTTATCTTCGGAGCATGAGCAGGTATACTAGGAACATCATTAAGCCTCTTAATTCGAGCAGAATTAGGAACCCCAGGTACTCTCATCGGAAATGATCAAATTTATAATGTTATTGTTACAGCTCATGCTTTCATCATAATTTTCTTCATAGTAATACCAATAATAATTGGAGGATTCGGTAATTGATTAGTACCTCTAATATTAGGAGCACCAGATATAGCATTCCCTCGAATAAATAATATAAGATTTTGATTATTACCCCCATCTCTATCACTTCTTATTATAAGAAGAATAGTAGAAAGTGGTGCAGGAACAGGATGAACAGTGTACCCCCCACTATCATCAAATATTGCCCATAGAGGTTCTTCTGTAGATCTTGCTATTTTCAGTCTCCATCTCGCAGGTGTATCTTCAATTCTAGGAGCTGTAAATTTTATTTCAACAATCATTAATATAAAATCACCAGGAATAACTTATGATCAAATACCCTTATTTGTTTGAGCTGTAGGAATTACAGCTTTACTTCTTCTTTTATCTTTACCTGTCCTCGCAGGAGCAATTACAATATTATTAACTGATCGAAATCTAAATACATCATTCTTTGACCCCACTGGAGGGGGAGACCCTATTCTTTATCAACATTTATTT
>PSFOR296-13|BC-PNEF-PSFOR0268|Lygistopterus sanguineus|COI-5P
AACATTATACTTTATCTTCGGAGCATGAGCAGGTATACTAGGAACATCATTAAGCCTCTTAATTCGAGCAGAATTAGGAACCCCAGGTACTCTCATCGGAAATGATCAAATTTATAATGTTATTGTTACAGCTCATGCTTTCATCATAATTTTCTTCATAGTAATACCAATAATAATTGGAGGATTCGGTAATTGATTAGTACCTCTAATATTAGGAGCACCAGATATAGCATTCCCTCGAATAAATAATATAAGATTTTGATTATT-------------------------------------------------------------------------------------------------------------------------------------------------------------------------------------------------------------------------------------------------------------------------------------------------------------------------------------------------------------------------------------------------------
>PSFOR284-13|BC-PNEF-PSFOR0256|Lymexylon navale|COI-5P
AACCTTATATTTTATTTTTGGTGCATGATCCGGAATGGTAGGAACATCTCTTAGTCTTTTAATCCGAGCTGAATTAGGAAATCCCGGAACTTTAATTGGTGATGATCAAATTTATAACGTGATTGTCACAGCCCATGCTTTTATCATAATTTTTTTTATGGTAATACCTATTATAATAGGTGGATTCGGAAATTGATTAGTCCCTTTAATACTAGGAGCTCCCGATATAGCATTTCCTCGAATAAATAATATAAGATTTTGATTACTTCCTCCTTCTTTAACACTTCTTCTTTTAAGAAGCCTAGTAGAAAAAGGAGTAGGAACCGGATGAACTGTATATCCTCCTTTATCAGCTAATATTTCTCATAGAGGATCTTCAGTAGATTTAGCTATTTTTAGATTACACTTAGCAGGGGTTTCCTCTATCTTAGGAGCTGCTAATTTCATTACTACAGTAATTAATATACGACCAAAAAAAATAACATTTGAACGAATACCTTTATTTGTTTGAGCTGTAGTTCTTACAGCAGTATTATTGCTTTTATCTCTTCCTGTTCTAGCTGGAGCAATTACTATACTCTTAACTGACCGAAACTTAAATACTTCCTTTTTCGACCCTGCAGGTGGAGGTGACCCAATTCTCTATCAACATTTATTT
>PSFOR1023-14|PASSIFOR-NM13-043|Lymexylon navale|COI-5P
AACCTTATATTTTATTTTTGGTGCATGATCCGGAATGGTAGGAACATCTCTTAGTCTTTTAATCCGAGCTGAATTAGGAAATCCCGGAACTTTAATTGGTGATGATCAAATTTATAACGTGATTGTCACAGCCCATGCTTTTATCATAATTTTTTTTATGGTAATACCTATTATAATAGGTGGATTCGGAAATTGATTAGTCCCTTTAATACTAGGAGCTCCCGATATAGCATTTCCTCGAATAAATAATATAAGATTTTGATTACTTCCTCCTTCTTTAACACTTCTTCTTTTAAGAAGCCTAGTAGAAAAAGGAGTAGGAACCGGATGAACTGTATATCCTCCTTTATCAGCTAATATTTCTCATAGAGGATCTTCAGTAGATTTAGCTATTTTTAGATTACACTTAGCAGGGGTTTCCTCTATCTTAGGAGCTGCTAATTTCATTACTACAGTAATTAATATACGACCAAAAAAAATAACATTTGAACGAATACCTTTATTTGTTTGAGCTGTAGTTCTTACAGCAGTATTATTGCTTTTATCTCTTCCTGTTCTAGCTGGAGCAATTACTATACTCTTAACTGACCGAAACTTAAATACTTCCTTTTTCGACCCTGCAGGTGGAGGTGACCCAATTCTCTATCAACATTTATTT
>PSFOR266-13|BC-PNEF-PSFOR0238|Marolia variegata|COI-5P
AACATTATATTTTATTTTTGGAGCTTGATCTGGAATAATTGGAACTTCACTAAGATTACTAATTCGTGCAGAATTAGGGAATCCTGGATCATTAATTGGAGATGACCAAATTTATAATGTTATTGTTACTGCCCATGCTTTTATTATAATTTTTTTTATAGTTATACCTATTATAATAGGAGGATTTGGAAATTGAATAGTCCCTTTAATACTAGGAGCCCCCGATATAGCTTTTCCTCGAATAAATAATATAAGATTTTGATTATTACCCCCATCATTAACTTTATTATTAATAAGAAGAATTGTAGAAAATGGAGCAGGAACTGGATGAACAGTTTACCCCCCACTGTCATCTAATATCGCCCATGGTGGCTCTTCTGTTGATTTGGCAATTTTTAGGTTACATCTTGCCGGTGCTTCATCCATTTTAGGAGCAGTAAACTTTATTACTACAATTATTAATATACGATCAATTGGAATAACATTTGACCGTATACCTTTATTTGTTTGATCTATCGCTATTACTGCTGTTTTATTATTATTATCTTTACCAGTATTAGCTGGTGCTATCACAATACTATTAACAGATCGAAATTTAAATACATCATTTTTTGACCCTGCTGGAGGGGGAGATCCTATTTTATATCAGCATTTATTT
>PSFOR209-13|BC-PNEF-PSFOR0181|Megischia curvipes|COI-5P
AACACTTTATTTTATCTTCGGAGCATGATCAGGAATAGTAGGAACATCTATAAGACTACTTATTCGAGCAGAATTAGGTAATCCTGGGTCATTAATTGGAGACGACCAAATCTATAATGTAATTGTTACAGCACATGCATTCATCATAATTTTCTTCATAGTTATACCAATTATAATTGGAGGATTCGGAAACTGATTAGTACCACTTATATTAGGAGCACCAGATATAGCATTTCCTCGAATAAATAACATAAGATTCTGACTACTACCTCCCTCATTAACCCTTCTTCTAACAAGAAGAATCGTTGAAAATGGAGCAGGAACTGGATGAACAGTTTATCCCCCACTAGCTTCAAATATTGCTCACGGAGGAGCATCTGTTGACTTAGCAATTTTCAGACTCCATTTAGCAGGAATCTCTTCAATTCTAGGAGCTGTAAATTTTATCACTACTGTAATCAACATACGGCCCCAAGGAATAACATTTGACCGAATACCATTATTTGTATGAGCAGTTGTAATTACAGCTGTACTATTACTCTTGTCTCTTCCTGTACTTGCAGGAGCTATTACAATACTATTAACAGACCGTAACATCAATACATCATTTTTTGATCCCGCAGGAGGGGGAGATCCTATTTTATATCAACACTTATTT
>PSFOR471-13|BC-PASSIFOR0044|Melandrya barbata|COI-5P
AACTCTTTACTTTATTTTTGGAGCTTGATCTGGAATAATTGGAACTTCAATAAGATTACTAATTCGATCAGAATTAAGTAATCCTGGTTCTTTAATTGGAGATGATCAAATCTACAATGTAATTGTTACTGCTCATGCTTTTATTATAATTTTTTTTATAGTTATACCTATTATAATAGGAGGATTTGGTAACTGACTTGTACCTTTAATATTAGGAGCTCCTGATATAGCTTTTCCTCGAATAAATAATATAAGATTTTGGCTTCTACCTCCATCTCTTACTCTTCTTTTAATAAGAAGAATTGTAGAAAATGGAGCAGGAACAGGATGAACAGTTTATCCTCCTTTATCATCTAATATTGCTCATAATGGAGCATCAGTAGATTTAACTATTTTTAGATTACATTTAGCAGGTATTTCATCTATTTTAGGAGCAGTAAATTTTATTACAACAATTATTAATATACGCCCAATCGGAATAACATTTGATCGAATACCTTTATTTGTTTGAGCAGTAGGAATTACTGCAGTTTTACTCCTTCTTTCATTACCTGTTTTAGCAGGAGCTATTACTATACTATTAACTGATCGTAATTTAAATACTTCTTTCTTCGACCCCGCAGGAGGGGGAGATCCAATTCTTTACCAACATTTATTT
>PSFOR464-13|BC-PASSIFOR0037|Melandrya barbata|COI-5P
AACTCTTTACTTTATTTTTGGAGCTTGATCTGGAATAATTGGAACTTCAATAAGATTACTAATTCGATCAGAATTAAGTAATCCTGGTTCTTTAATTGGAGATGATCAAATCTACAATGTAATTGTTACTGCTCATGCTTTTATTATAATTTTTTTTATAGTTATACCTATTATAATAGGAGGATTTGGTAACTGACTTGTACCTTTAATATTAGGAGCTCCTGATATAGCTTTTCCTCGAATAAATAATATAAGATTTTGGCTTCTACCTCCATCTCTTACTCTTCTTTTAATAAGAAGAATTGTAGAAAATGGAGCAGGAACAGGATGAACAGTTTATCCTCCTTTATCATCTAATATTGCTCATAATGGAGCATCAGTAGATTTAACTATTTTTAGATTACATTTAGCAGGTATTTCATCTATTTTAGGAGCAGTAAATTTTATTACAACAATTATTAATATACGCCCAATCGGAATAACATTTGATCGAATACCTTTATTTGTTTGAGCAGTAGGAATTACTGCAGTTTTACTCCTTCTTTCATTACCTGTTTTAGCAGGAGCTATTACTATACTATTAACTGATCGTAATTTAAATACTTCTTTCTTCGACCCCGCAGGAGGGGGAGATCCAATTCTTTACCAACATTTATTT
>PSFOR268-13|BC-PNEF-PSFOR0240|Melandrya caraboides|COI-5P
AACTTTATATTTTATTTTTGGAGCTTGATCAGGAATAATTGGAACTTCGATAAGATTATTAATTCGGTCAGAATTAGGAAATCCGGGATCTTTAATTGGAGATGATCAAATTTATAATGTAATTGTTACAGCTCACGCTTTTGTAATAATTTTTTTTATAGTCATACCTATTATAATAGGAGGATTTGGAAATTGACTTGTTCCTCTTATATTAGGTGCCCCAGATATAGCTTTTCCTCGAATAAATAACATAAGATTTTGACTTTTACCCCCTTCTCTTTCTCTACTACTTATAAGAAGTTTTGTAGAAAATGGAGCAGGAACTGGATGAACTGTTTATCCACCTCTTTCTTCTAACATTGCACATAATGGACCTTCAGTTGATTTGACTATTTTTAGTTTACATTTAGCAGGAGTTTCCTCTATTTTAGGAGCAGTAAATTTTATTACTACTATTATTAATATACGACCAATAGGAATATCTATAGATCGAATACCTTTATTTGTATGAGCAGTTGGAATTACTGCAATTTTATTACTTCTTTCTTTACCCGTTTTAGCAGGAGCTTTTACAATATTATTAACTGATCGAAATTTAAATACTTCCTTTTTTGATCCAGCAGGAGGAGGAGATCCAATTTTATACCAACATCTATTT
>PSFOR366-13|BC-PNEF-PSFOR0338|Melandrya caraboides|COI-5P
AACTTTATATTTTATTTTTGGAGCTTGATCAGGAATAATTGGAACTTCGATAAGATTATTAATTCGGTCAGAATTAGGAAATCCGGGATCTTTAATTGGAGATGATCAAATTTATAATGTAATTGTTACAGCTCACGCTTTTGTAATAATTTTTTTTATAGTCATACCTATTATAATAGGAGGATTTGGAAATTGACTTGTTCCTCTTATATTAGGTGCCCCAGATATAGCTTTTCCTCGAATAAATAACATAAGATTTTGACTTTTACCCCCTTCTCTTTCTCTATTACTTATAAGAAGTTTTGTAGAAAATGGAGCAGGAACTGGATGAACTGTTTATCCACCTCTTTCTTCTAACATTGCACATAATGGACCTTCAGTTGATTTGACTATTTTTAGTTTACATTTAGCAGGAGTTTCCTCTATTTTAGGAGCAGTAAATTTTATTACTACTATTATTAATATACGACCAATAGGAATATCTATAGATCGAATACCTTTATTTGTATGAGCAGTTGGAATTACTGCAATTTTATTACTTCTTTCTTTACCCGTTTTAGCAGGAGCTATTACAATATTATTAACTGATCGAAATTTAAATACTTCCTTTTTTGATCCAGCAGGAGGAGGAGATCCAATTTTATACCAACATCTATTT
>PSFOR873-14|BC-PASSIFOR0091|Melandrya caraboides|COI-5P
AACTTTATATTTTATTTTTGGAGCTTGATCAGGAATAATTGGAACTTCGATAAGATTATTAATTCGGTCAGAATTAGGAAATCCGGGATCTTTAATTGGAGATGATCAAATTTATAATGTAATTGTTACAGCTCACGCTTTTGTAATAATTTTTTTTATAGTCATACCTATTATAATAGGAGGATTTGGAAATTGACTTGTTCCTCTTATATTAGGTGCCCCAGATATAGCTTTTCCTCGAATAAATAACATAAGATTTTGACTTTTACCCCCTTCTCTTTCTCTATTACTTATAAGAAGTTTTGTAGAAAATGGAGCAGGAACTGGATGAACTGTTTATCCACCTCTTTCTTCTAACATTGCACATAATGGACCTTCAGTTGATTTGACTATTTTTAGTTTGCATTTAGCAGGAGTTTCCTCTATTTTAGGAGCAGTAAATTTTATTACTACTATTATTAATATACGACCAATAGGAATATCTATAGATCGAATACCTTTATTTGTATGAGCAGTTGGAATTACTGCAATTTTATTACTTCTTTCTTTACCCGTTTTAGCAGGAGCTATTACAATATTATTAACTGATCGAAATTTAAATACTTCCTTTTTTGATCCAGCAGGAGGAGGAGATCCAATTTTATACCAACATCTATTT
>PSFOR886-14|BC-PASSIFOR0104|Melanotus castanipes|COI-5P
AACCCTTTATTTTATTTTCGGAGCATGAGCCGGAATACTAGGAACCTCCTTAAGACTACTAATCCGAGCAGAATTAGGAAATCCAGGTTCACTGATTGGCAATGATCAAATCTACAATGTTATTGTTACAGCTCACGCCTTCATTATAATTTTCTTTATAGTTATACCAATTATAATTGGGGGATTCGGAAACTGGCTAGTACCTTTAATACTTGGAGCCCCAGATATAGCATTCCCACGAATAAACAACATAAGATTCTGGTTACTCCCCCCGTCACTAAGACTTCTATTAATAAGAAGAATTGTAGAAAATGGAGCAGGAACAGGGTGAACTGTTTACCCTCCCCTCTCATCTAACATTGCCCATAGAGGATCTTCTGTTGATTTAGCAATCTTTAGTCTCCACTTAGCAGGAATTTCTTCTATCCTAGGAGCAGTAAATTTTATTTCAACAGTGATTAATATACGGTCAACAGGAATAACATTTGATCGTATACCTCTATTCGTATGAGCAGTTGCATTAACAGCTCTTTTACTTCTCTTATCTCTCCCAGTCCTTGCAGGAGCAATCACTATACTTCTAACCGACCGAAACCTAAACACTTCATTCTTCGACCCTGCAGGGGGAGGAGATCCAATTCTTTACCAACATTTATTT
>PSFOR761-13|BC-PNEF-PSFOR0638|Melanotus castanipes|COI-5P
AACCCTTTATTTTATTTTCGGAGCATGAGCCGGAATACTAGGTACCTCCTTAAGACTACTAATCCGAGCAGAATTAGGAAACCCAGGATCACTGATTGGCAATGACCAAATCTACAATGTTATTGTCACAGCTCACGCTTTCATTATAATTTTCTTTATAGTTATACCAATTATAATTGGAGGATTTGGAAACTGGCTAGTACCTTTAATACTTGGAGCCCCAGATATGGCATTCCCACGAATAAACAACATAAGATTCTGGTTACTACCTCCATCTCTAAGACTTCTACTAATAAGAAGAATTGTAGAAAATGGAGCAGGTACAGGATGAACTGTTTACCCTCCCCTCTCATCTAATATTGCTCATAGAGGATCTTCTGTCGATTTAGCAATCTTCAGTCTCCATTTAGCAGGAATCTCATCTATCCTAGGAGCAGTAAATTTTATTTCGACAGTGATTAATATACGATCAACAGGAATAACATTTGATCGTATACCTCTACTCGTTTGAGCAGTTGCATTAACTGCTCTTTTACTTCTTCTATCTCTACCAGTCCTTGCAGGAGCAATCACAATACTTCTAACCGACCGAAACCTAAACACTTCATTCTTTGACCCTGCAGGAGGAGGGGACCCAATTCTTTATCAACATTTATTC
>PSFOR764-13|BC-PNEF-PSFOR0641|Melanotus crassicollis|COI-5P
AACCCTTTATTTCATTTTTGGAGCATGAGCAGGAATACTAGGCACCTCCTTAAGACTACTAATCCGAGCAGAATTAGGAAACCCAGGATCACTGATTGGGAATGACCAAATTTATAATGTAATCGTTACAGCTCACGCCTTCATCATAATTTTCTTTATAGTTATGCCAATTATAATTGGGGGATTTGGAAAATGATTAGTTCCCCTTATACTAGGAGCCCCTGACATAGCCTTCCCACGAATAAACAATATAAGATTCTGGCTTCTCCCACCTTCACTAAGCCTTCTTCTAATAAGAAGAATTGTAGAAAACGGAGCAGGAACAGGATGAACTGTCTACCCACCCCTTTCATCAAATATCGCTCATAGAGGATCATCTGTTAATTTAGCTATTTTTAGACTTC--------------------------------------------------------------------------------------------------------------------------------------------------------------------------------------------------------------------------------------------------------------
>PSFOR823-13|BC-PSFOR-JD0052|Melanotus tenebrosus|COI-5P
-----------------------------------------------------------------------------------------------------------------------------------------------------------------------------------------------------------------------------------------------------------TAAGATTTTGGCTACTCCCCCCGTCTCTTAGTCTTTTATTAATAAGAAGAATCGTAGAAAATGGGGCTGGAACCGGGTGAACCGTGTACCCCCCTCTCTCCTCAAATATCGCTCACAGAGGATCTTCTGTTGATCTAGCAATTTTTAGACTTCACCTAGCAGGGATTTCATCCATCCTAGGAGCAGTAAATTTTATCTCAACAGTTATTAATATACGATCAACAGGAATAACATTTGACCGTATACCACTATTTGTCTGAGCTGTAGCTCTGACTGCCCTTCTTCTCCTTCTCTCTTTACCAGTTCTTGCAGGAGCAATCACAATACTTTTAACTGACCGAAACTTAAATACAT-----------------------------------------------------
>PSFOR765-13|BC-PNEF-PSFOR0642|Melanotus tenebrosus|COI-5P
-----------------------------------------------------------------------------------------------------------------------------------------------------------------------------------------------------------------------------------------------------------TAAGATTTTGGCTACTCCCCCCGTCTCTTAGTCTTTTATTAATAAGAAGAATCGTAGAAAATGGGGCTGGAACCGGGTGAACCGTGTATCCCCCTCTCTCCTCAAATATCGCTCACAGAGGATCTTCTGTTGATCTAGCAATTTTTAGACTTCACCTAGCAGGGATTTCATCCATCCTAGGAGCAGTAAATTTTATCTCAACAGTTATTAATATACGATCAACAGGAATAACATTTGACCGTATACCACTATTTGTCTGAGCTGTAGCTCTGACTGCCCTTCTTCTCCTTCTCTCTTTACCAGTTCTTGCAGGAGCAATCACAATACTTTTAACTGACCGAAACTTAAATACATCCTTCTTTGACCCAGCAGGAG--------------------------------
>PSFOR763-13|BC-PNEF-PSFOR0640|Melanotus villosus|COI-5P
--CCCTTTATTTTATTTTTGGGGCATGAGCCGGAATACTAGGCACCTCCTTAAGACTACTAATCCGAGCAGAATTAGGAAACCCAGGTTCTCTGATTGGTAATGATCAAATCTACAACGTTATTGTTACAGCTCACGCTTTCATTATAATTTTCTTCATGGTAATACCAATCATAATTGGGGGATTTGGAAACTGATTAGTCCCTTTAATACTCGGAGCTCCAGATATAGCATTCCCACGAATAAACAACATAAGATTCTGATTGCTTCCCCCATCACTTAGACTCCTTCTAATAAGAAGAATTGTAGAAAATGGAGCAGGAACAGGATGAACTGTTTACCCACCCCTCTCATCTAATATTGCGCACAGAGGATCTTCTGTTGATTTAGCAATCTTTAGCCTTCACTTAGCAGGAATCTCCTCTATTCTAGGAGCAGTAAATTTTATTTCAACAGTAATTAATATACGATCAACAGGAATAACATTTGATCGAATACCTCTATTCGTATGAGCAGTTGCATTAACTGCTCTTTTACTTCTTCTTTCCCTTCCAGTTCTTGCAGGAGCAATCACAATACTTTTAACCGACCGAAACCTAAACACATCATTCTTTGACCCTGCGGGAGGAGGAGACCCAATTCTTTACCAACATTTATTC
>PSFOR1042-14|PASSIFOR-NM13-062|Melanotus villosus|COI-5P
AACCCTTTATTTTATTTTTGGTGCATGAGCCGGAATACTAGGTACCTCCTTAAGACTACTAATCCGAGCAGAATTAGGAAACCCAGGTTCTCTGATTGGTAATGATCAAATCTACAACGTTATTGTTACAGCTCACGCTTTCATTATAATTTTCTTCATAGTAATACCAATCATAATTGGGGGATTCGGAAACTGATTAGTCCCTCTAATACTCGGGGCACCAGATATAGCATTCCCACGAATAAACAACATAAGATTCTGATTGCTTCCCCCATCACTAAGACTTCTTCTAATAAGAAGAATTGTAGAAAATGGAGCAGGAACAGGATGAACTGTTTACCCACCCCTCTCATCTAATATTGCACACAGAGGGTCTTCTGTTGATTTAGCAATCTTTAGTCTTCACTTAGCAGGAATCTCTTCTATTCTAGGAGCAGTAAATTTTATTTCAACAGTAATTAATATACGATCAACAGGAATAACATTTGACCGGATACCTCTATTTGTATGGGCAGTTGCATTAACTGCTCTTTTACTTCTTCTATCCCTCCCAGTACTAGCGGGAGCAATTACAATACTTTTAACCGACCGAAACCTAAACACATCATTCTTTGACCCTGCAGGAGGAGGAGACCCAATTCTTTACCAACATTTATTC
>PSFOR762-13|BC-PNEF-PSFOR0639|Melanotus villosus|COI-5P
-----------------------------------------------------------------------------------------------------------------------------------------------------------------------------------------------------------------------------------------------------------TAAGATTCTGATTGCTTCCCCCATCACTAAGACTTCTTCTAATAAGAAGAATTGTAGAAAATGGAGCAGGAACAGGATGAACTGTTTACCCACCCCTCTCATCTAATATTGCACACAGAGGGTCTTCTGTTGATTTAGCAATCTTTAGTCTTCACTTAGCAGGAATCTCTTCTATTCTAGGAGCAGTAAATTTTATTTCAACAGTAATTAATATACGATCAACAGGAATAACATTTGACCGGATACCTCTATTTGTATGGGCAGTTGCATTAACTGCTCTTTTACTTCTTCTATCCCTCCCAGTACTAGCGGGAGCAATTACAATACTTTTAACCGACCGAAACCTAAACACATCATTCTTTGACCCTGCAGGAGGAGGAGACCC----------------------
>PSFOR473-13|BC-PASSIFOR0046|Melasis buprestoides|COI-5P
-----------------------------------------------------------------------------------------------------------------------------------------------------------------------------------------------------------------------------------------------------------TAAGATTCTGACTCCTTCCTCCTTCTTTATCTCTTCTTCTAATAAATAGAATAGTTGAGAGAGGGGCAGGTACAGGATGAACCGTTTATCCACCCCTTTCGTCTAATATTGCCCATAGAGGGGCCTCTGTTGATCTAGCTATCTTCAGTCTCCATTTAGCAGGTATTTCCTCTATCTTAGGAGCAATTAATTTTATTACAACAGTAATTAATATACGACCAAAAAGAATAACCTTTGATAAAATCCCATTATTTGTATGATCAGTTAGATTAACAGCACTATTATTACTCCTAGCTCTTCCAGTTTTAGCTGGAGCAATCACAATACTATTAACAGACCGAAACTTAAATACAACATTTTTTGACCCAGCAGGTGGGGGTGACCCAATTCTTTATCAACATTTATTT
>PSFOR319-13|BC-PNEF-PSFOR0291|Melasis buprestoides|COI-5P
-----------------------------------------------------------------------------------------------------------------------------------------------------------------------------------------------------------------------------------------------------------TAAGATTCTGACTCCTTCCTCCTTCTTTATCTCTTCTTCTAATAAATAGAATAGTTGAGAGAGGGGCAGGTACAGGATGAACCGTTTATCCACCCCTTTCGTCTAATATTGCCCATAGAGGGGCCTCTGTTGATCTAGCTATCTTCAGTCTCCATTTAGCAGGTATTTCCTCTATCTTAGGAGCAATTAATTTTATTACAACAGTAATTAATATACGACCAAAAAGAATAACCTTTGATAAAATCCCATTATTTGTATGATCAGTTAGATTAACAGCACTATTATTACTCCTAGCTCTTCCAGTTTTAGCTGGAGCAATCACAATACTATTAACAGACCGAAAC---------------------------------------------------------------
>PSFOR317-13|BC-PNEF-PSFOR0289|Melasis buprestoides|COI-5P
AACACTCTACTTTATCTTCGGAGCTTGATCAGGAATAATAGGTACTTCTTTAAGACTATTAATCCGAATAGAATTAAGATCCCCAGGAGCATTAATTGGAAATGACCAAATCTATAATGTAATCGTTACTGCCCATGCTTTTGTTATAATTTTTTTCATAGTAATACCTATAATGATAGGAGGATTTGGTAATTGATTAGTTCCTCTTATATTAGGGGCTCCAGACATAGCTTTTCCCCGAATAAATAATATAAGATTCTGACTCCTTCCTCCTTCTTTATCTCTTCTTCTAATAAATAGAATAGTTGAGAGAGGGGCAGGTACAGGATGAACCGTTTATCCACCCCTTTCGTCTAATATTGCCCATAGAGGGGCCTCTGTTGATCTAGCTATCTTCAGTCTCCATTTAGCAGGTATTTCCTCTATCTTAGGAGCAATTAATTTTATTACAACAGTAATTAATATACGACCAAAAAGAATAACCTTTGATAAAATCCCATTATTTGTATGATCAGTTAGATTAACAGCACTATTATTACTCCTAGCTCTTCCAGTTTTAGCTGGAGCAATCACAATACTATTAACAGACCGAAACTTAAATACAACATTTTTTGACCCAGCAGGTGGGGG----------------------------
>PSFOR062-13|BC-PNEF-PSFOR0034|Mesosa curculionoides|COI-5P
AACCTTATACTTCCTATTTGGTGCCTGGGCTGGAATACTTGGAACTTCACTAAGAGTCCTAATTCGATCAGAATTAGGAAATCCTGGAACTTTAATTGGTAATGATCAAATTTATAATGTTATTGTAACAGCTCATGCTTTTGTTATAATTTTTTTCATAGTTATACCAATTATAATTGGAGGATTTGGAAATTGATTAGTTCCATTAATACTTGGTGCCCCTGACATAGCATTTCCTCGAATAAACAATATAAGATTTTGATTACTACCGCCATCTTTATCATTATTAATTATAAGAAGAATTGTAGAAAAAGGTGCTGGGACAGGATGAACCGTTTATCCTCCATTAGCTGCAAATGTGGCTCATAATGGGGCTTCAGTTGATTTAGCAATTTTTAGCCTTCACCTTGCTGGAATTTCCTCAATTTTAGGAGCAGTAAATTTTATTACAACAGTTATTAATATACGCCCCAGAGGAATATCCTTTGATCGTCTTCCTTTATTTGTCTGAGCTGTAAAAATTACAGCAATTTTACTATTACTTTCACTTCCAGTCTTAGCCGGAGCTATCACTATACTTCTTACTGATCGAAATTTAAATACTTCTTTCTTTGATCCTGCTGGTGGTGGAGATCCAATTTTATATCAACATTTATTT
>PSFOR438-13|BC-PNEF-PSFOR0410|Mesosa nebulosa|COI-5P
AACTTTATATTTTTTATTTGGAGCTTGAGCTGGAATAGTTGGAACATCTTTAAGAATATTAATTCGATCAGAATTAGGAAACCCTGGAACTTTAATTGGTGACGATCAAATTTATAATGTTATTGTTACAGCTCATGCTTTTATTATAATTTTTTTTATAGTTATACCAATTATAATTGGAGGATTTGGAAATTGATTAGTCCCATTAATATTAGGAGCCCCTGATATAGCTTTCCCTCGAATAAATAATATAAGATTTTGATTATTACCGCCATCTTTAACTTTATTAATTATAAGTAGAATTATTGAAAAAGGAGCTGGTACAGGATGAACAGTTTATCCCCCATTAGCTGCTAATGTAGCTCATAATGGAGCTTCAGTTGACTTAGCTATCTTTAGTCTTCATTTAGCTGGAATTTCTTCTATTTTAGGAGCCGTTAATTTTATTACAACAGTAATTAATATACGTCCTAAAGGAATACTATTTGATCGATTACCTTTATTTGTATGAGCAGTAAAAATTACTGCTATTTTATTATTATTATCATTACCAGTTTTAGCCGGAGCCATTACTATACTTTTAACAGATCGAAATTTAAACACTTCTTTTTTTGACCCAGCTGGTGGGGGAGATCCAATTCTTTATCAACATTTATTT
>PSFOR022-13|BC-PASSIFOR0022|Mesosa nebulosa|COI-5P
AACTTTATATTTTTTATTTGGAGCTTGAGCTGGAATAGTTGGAACATCTTTAAGAATATTAATTCGATCAGAATTAGGAAACCCTGGAACTTTAATTGGTGACGATCAAATTTATAATGTTATTGTTACAGCTCATGCTTTTATTATAATTTTTTTTATAGTTATACCAATTATAATTGGAGGATTTGGAAATTGATTAGTCCCATTAATATTAGGAGCCCCTGATATAGCTTTCCCTCGAATAAATAATATAAGATTTTGATTATTACCGCCATCTTTAACTTTATTAATTATAAGTAGAATTATTGAAAAAGGAGCTGGTACAGGATGAACAGTTTATCCCCCATTAGCTGCTAATGTAGCTCATAATGGAGCTTCAGTTGACTTAGCTATCTTTAGTCTTCATTTAGCTGGAATTTCTTCTATTTTAGGAGCCGTTAATTTTATTACAACAGTAATTAATATACGTCCTAAAGGAATACTATTTGATCGATTACCTTTATTCGTATGAGCAGTAAAAATTACTGCTATTTTATTATTATTATCATTACCAGTTTTAGCCGGAGCCATTACTATACTTTTAACAGATCGAAATTTAAACACTTCTTTTTTTGACCCAGCTGGTGGGGGAGATCCAATTCTTTATCAACATTTATTT
>PSFOR1011-14|PASSIFOR-NM13-031|Microrhagus pygmaeus|COI-5P
TACACTATACTTTATTTTCGGAGTTTGAGCTGGACTAGTTGGTACTTCATTGAGATTGCTAATTCGATTAGAACTGGGAATATCTGGTACATTAATTGGTAATGATCAAATTTTCAATGTCATTGTAACTGCTCATGCCTTTATCATAATTTTTTTTATAGTTATACCAACCATAATAGGAGGGTTTGGAAACTGACTAATCCCTTTAATATTAAGAGCCCCTGATATGGCCTTTCCTCGTATAAATAACCTAAGATTCTGATTATTACCCCCTGCTATTTCCCTCCTACTAATAAGCAGAATAGTAGAGAGAGGGGCTGGTACCGGCTGAACAGTTTATCCCCCCTTAGCGTCTAACATCGCCCATAGGGGGCCATCAGTAGATTTAACAATTTTCAGCCTTCATCTAGCTGGGGTCTCCTCTATTCTAGGAGCCGTAAATTTTATTTCTACAATTATTAATATACGGTCTCCAATAATAACATTAAGAAAAATGCCACTATTCGTTTGATCAGTTCTATTAACTGCGATTCTTCTTCTACTATCACTACCAGTTCTAGCGGGTGCCATTACTATACTTTTAACGGATCGAAATTTTAACACATCTTTCTTTGAACCCTCTGGTGGCGGGGACCCCATCTTGTATCAACACTTATTC
>PSFOR1000-14|PASSIFOR-NM13-020|Microrhagus pygmaeus|COI-5P
TACACTATACTTTATTTTCGGAGTTTGAGCTGGACTAGTTGGTACTTCATTGAGATTGCTAATTCGATTAGAACTGGGAATATCTGGTACATTAATTGGTAATGATCAAATTTTCAATGTCATTGTAACTGCTCATGCCTTTATCATAATTTTTTTTATAGTTATACCAACCATAATAGGAGGGTTTGGAAACTGACTAATCCCTTTAATATTAAGAGCCCCTGATATGGCCTTTCCTCGTATAAATAACCTAAGATTCTGATTATTACCCCCTGCTATTTCCCTCCTACTAATAAGCAGAATAGTAGAGAGAGGGGCTGGTACCGGCTGAACAGTTTATCCCCCCTTAGCGTCTAACATCGCCCATAGGGGGCCATCAGTAGATTTAACAATTTTCAGCCTTCATCTAGCTGGGGTCTCCTCTATTCTAGGAGCCGTAAATTTTATTTCTACAATTATTAATATACGGTCTCCAATAATAACATTAAGAAAAATGCCACTATTCGTTTGATCAGTTCTATTAACTGCGATTCTTCTTCTACTATCACTACCAGTTCTAGCGGGTGCCATTACTATACTTTTAACGGATCGAAATTTTAACACATCTTTCTTTGAACCCTCTGGTGGCGGGGACCCCATCTTGTATCAACACTTATTC
>PSFOR130-13|BC-PNEF-PSFOR0102|Molorchus minor|COI-5P
AACCCTTTATTTTATTTTCGGAGCATGGGCCGGTATAGTAGGGACTGCCCTAAGAATACTAATTCGATCAGAATTAGGAAATCCCGGCTCTCTCATTGGAGATGATCAAATTTATAACGTAATCGTTACAGCACACGCTTTTGTAATAATTTTCTTTATGGTAATGCCTATTATAATTGGAGGATTCGGAAATTGATTAGTGCCCCTAATACTAGGAGCACCAGATATGGCTTTTCCACGAATAAATAACATAAGATTTTGACTTTTACCCCCCTCACTCACCCTACTTCTTCTAAGAAGAATTGTAGAAAGGGGGGCAGGTACAGGCTGAACGGTATACCCTCCCCTATCTTCAAATATCGCTCATGGGGGTTCATCAGTTGACCTAGCTATTTTTAGTTTACATTTAGCAGGGATTTCATCAATCCTGGGAGCTGTAAACTTTATTTCAACAGTTATTAATATACGGCCAGAAGGTATAAATTTAGACCGAATACCATTATTTATCTGAGCTGTTATAATTACTGCAATTTTGCTTCTCTTATCGCTGCCTGTTCTAGCAGGAGCAATCACGATATTATTGACTGATCGAAATATCAATACATCATTCTTTGATCCTGCCGGAGGGGGAGATCCTATTTTATACCAGCACTTATTT
>PSFOR131-13|BC-PNEF-PSFOR0103|Monochamus galloprovincialis|COI-5P
GACATTATATTTTATTTTTGGAGCATGATCAGGAATAGTTGGAACATCTTTAAGATTATTAATTCGGTCAGAACTAGGAATACCAGGATCCTTAATTGGTGATGATCAAATTTACAATGTAATTGTTACAGCTCATGCCTTTATTATAATTTTTTTTATAGTAATACCAATTATAATTGGTGGATTTGGGAATTGATTAGTTCCTTTAATACTAGGAGCTCCTGATATAGCTTTTCCCCGAATAAATAACATAAGATTTTGACTTTTACCCCCTTCCTTAACTCTTTTAATTATAAGAAGAATTGTAGAAAATGGAGCTGGAACTGGATGAACAGTTTATCCCCCCTTAGCAGCAAATGTTGCTCATAGTGGTTCATCAGTTGATTTAGCAATTTTTAGTCTTCATTTAGCAGGAGTTTCTTCTATTTTAGGAGCAGTAAATTTTATTACAACTGTAATTAATATACGACCTAGAGGAATAAATTTAGATCGTTTACCTTTATTTGTCTGAGCAGTAAAAATTACTGCTATCCTTCTTTTATTATCTTTACCAGTATTAGCTGGTGCAATTACAATACTTTTAACAGATCGAAATCTAAATACATCATTTTTTGATCCAGCAGGAGGAGGAGACCCAATTTTATATCAACACTTATTT
>PSFOR132-13|BC-PNEF-PSFOR0104|Monochamus sutor|COI-5P
GACATTATATTTTATTTTTGGAGCATGATCAGGAATAGTTGGAACATCTTTAAGATTACTAATTCGATCAGAACTAGGAATACCAGGAGCCTTAATTGGTGATGATCAAATTTACAATGTAATTGTTACAGCTCATGCCTTTGTTATAATTTTTTTTATAGTGATACCAATTATAATTGGTGGATTTGGAAATTGATTAGTTCCTTTAATACTAGGTGCTCCTGATATAGCTTTCCCCCGAATAAATAACATAAGATTTTGACTTTTACCCCCTTCCTTAACTCTTTTAATTATAAGAAGAATTGTAGAAAATGGAGCTGGAACTGGATGAACAGTTTATCCCCCTTTAGCAGCAAATGTTGCTCATAGTGGTTCATCAGTTGATTTAGCAATTTTTAGTCTTCATTTAGCAGGAGTTTCTTCTATTTTAGGAGCAGTAAATTTTATTACAACTGTAATTAATATACGACCTAGAGGAATAAATTTAGACCGTTTACCTTTATTTGTCTGAGCGGTAAAAATTACTGCTATCCTTCTTTTATTATCTTTACCAGTATTAGCTGGTGCAATTACAATACTTTTAACAGATCGAAACTTAAATACATCATTTTTTGACCCAGCAGGAGGAGGTGATCCAATTTTATACCAACATTTATTT
>PSFOR063-13|BC-PNEF-PSFOR0035|Morimus asper|COI-5P
TACATTATATTTTCTTTTTGGGGCATGGGCAGGAATAGTTGGGACATCTCTCAGAGTCCTAATTCGAACAGAGTTGGGATCCCCCGGATCTTTAATTGGAGATGACCAAATTTACAATGTTATCGTTACAGCTCATGCATTTATTATAATTTTTTTCATAGTTATACCAATTATAATCGGAGGATTTGGAAATTGACTAGTACCCCTAATACTAGGAGCCCCAGATATAGCCTTTCCTCGAATAAATAATATAAGATTTTGACTATTACCCCCTTCTTTATTTTTACTAATTATAAGAAGAATTGTAGAAAATGGAGCAGGAACAGGATGAACGGTATATCCCCCCTTGGCGGCAAATGTAGCCCATGCCGGAGCATCTGTAGATTTAGCTATTTTCAGATTACATCTAGCAGGAATTTCCTCTATTCTTGGGGCTGTTAATTTTATCACCACAATTATTAACATGCGACCAAAAGGAATAAATATAGATCGAGTTCCCCTATTTGTTTGAGCAGTAAAAATTACTGCCATTTTACTACTACTTTCTTTACCTGTATTGGCAGGTGCTATTACCATACTTTTAACAGATCGAAATTTAAATACTTCCTTCTTTGATCCCGCAGGAGGTGGAGACCCAATTCTTTATCAACACTTATTT
>PSFOR391-13|BC-PNEF-PSFOR0363|Mycetochara humeralis|COI-5P
-ACACTTTATTTTATTTTCGGAGCATGATCAGGTATAGTAGGTACATCCCTAAGACTACTAATTCGAGCAGAACTCGGAAACCCCGGATCTCTTATTGGAGATGACCAAATTTATAACGTAATTGTTACTGCCCATGCATTTATCATAATTTTTTTTATAGTTATACCAATCATAATTGGAGGATTTGGTAATTGATTAGTACCTTTAATATTAGGTGCACCTGATATAGCCTTCCCTCGAATAAACAATATAAGATTCTGGCTACTTCCCCCCTCATTAACCCTTCTTTTAATAAGAAGAATGGTAGAAAGAGGGGCAGGAACTGGATGAACAGTTTACCCACCCTTATCAGCTAATATTGCCCATGGCGGAGCATCTGTAGATCTAGCCATTTTTAGGCTTCATTTAGCAGGAATTTCCTCAATTTTAGGAGCAGTAAATTTCATTACCACAGTAATTAATATAAAACCTCAAGGCATATCATTTGACCGAATACCATTATTTGTATGAGCTGTAGTAATCACAGCTGTTTTACTTCTACTATCATTACCTGTATTAGCAGGTGCCATCACAATACTTCTTACAGATCGTAATATTAACACCTCATTCTTTGACCCTGCAGGGGGAGGTGACCCAATCTTATATCAACATTTATTC
>PSFOR395-13|BC-PNEF-PSFOR0367|Mycetochara maura|COI-5P
-----------------------------------------------------------------------------------------------------------------------------------------------------------------------------------------------------------------------------------------------------------TAAGATTCTGATTACTCCCCCCTTCCTTAACTCTCCTTCTAATAAGAAGAATAGTAGAAAGAGGAGCAGGTACCGGTTGAACTGTTTATCCCCCTTTATCATCAAATATTGCCCATGGAGGAGCATCTGTAGACCTAGCAATTTTTAGACTCCATTTAGCAGGAATTTCCTCAATTTTAGGTGCAGTAAATTTTATTACTACAGTTATTAATATAAAACCTCAAGGAATATCATTTGACCGAATACCTTTATTTGTTTGAGCAGTTGTAATCACAGCAGTTTTATTATTACTATCATTACCCGTACTGGCAGGAGCCATCACCATACTTTTAACAGATCGAAATATTAATACATCCTTTTTTGATCCTGCAGGAGGGGGTGACCCCCTTCTTTACCAACATTTATTT
>PSFOR211-13|BC-PNEF-PSFOR0183|Mycetochara maura|COI-5P
TACACTTTATTTTATTTTCGGAGCATGATCAGGAATAGTCGGAACATCGCTAAGAATACTAATCCGCGCAGAACTTGGAAATCCCGGATCTCTCATTGGAGATGACCAAATTTACAATGTAATTGTAACTGCCCACGCATTCATCATAATTTTCTTTATAGTTATACCAATCATAATTGGAGGATTCGGAAACTGATTAGTTCCACTAATACTAGGAGCACCAGACATAGCATTCCCCCGTATAAATAACATAAGATTCTGATTACTCCCCCCTTCCTTAACTCTCCTTCTAATAAGAAGAATAGTAGAAAGAGGAGCAGGTACCGGTTGAACTGTTTATCCCCCTTTATCATCAAATATTGCCCATGGAGGAGCATCTGTAGACCTAGCAATTTTTAGACTCCATTTAGCAGGAATTTCCTCAATTTTAGGTGCAGTAAATTTTATTACTACAGTTATTAATATAAAACCTCAAGGAATATCATTTGACCGAATACCTTTATTTGTTTGAGCAGTTGTAATCACAGCAGTTTTATTATTACTATCATTACCCGTACTGGCAGGAGCCATCACCATACTTTTAACAGATCGAAATATTAATACATCCTTTTTTGATCCTGCAGGAGGGGGTGACCCCCTTCTTTACCAACATTTATTT
>PSFOR212-13|BC-PNEF-PSFOR0184|Mycetochara quadrimaculata|COI-5P
AACACTTTACTTCATCTTCGGAGCTTGATCAGGAATAGTAGGAACGTCACTAAGCCTATTAATCCGTGCAGAACTTGGAAACCCAGGATCTCTTATCGGAGATGATCAAATCTATAATGTCATTGTAACTGCACATGCTTTCATTATAATTTTTTTTATAGTTATACCCATTATAATCGGAGGATTCGGAAATTGACTAGTACCCCTCATACTAGGCGCACCCGATATGGCATTCCCACGAATAAACAATATAAGATTTTGACTCCTACCCCCTTCATTAACACTACTTTTAATAAGAAGCATAGTTGAAAGAGGGGCTGGAACAGGGTGAACTGTTTATCCACCTCTATCATCAAACATTGCTCATGGAGGAGCTTCTGTAGACTTGACTATTTTTAGTCTCCATCTAGCAGGAATCTCATCAATTTTAGGTGCAGTAAATTTTATTACTACAGTAATCAACATAAAACCCCAAGGAATAACACTTGACCGTATACCCCTGTTTGCATGAGCTGTAGTAATCACAGCAGTTCTTTTACTATTATCATTGCCAGTTCTAGCCGGAGCAATCACAATATTATTAACAGATCGAAATATTAACACCTCATTCTTTGATCCTGCGGGAGGAGGAGATCCTATTTTATACCAGCACCTATTT
>PSFOR396-13|BC-PNEF-PSFOR0368|Mycetochara quadrimaculata|COI-5P
-ACACTTTACTTCATCTTCGGAGCTTGATCAGGAATAGTAGGAACGTCACTAAGCCTATTAATCCGTGCAGAACTTGGAAACCCAGGATCTCTTATCGGAGATGATCAAATCTATAATGTCATTGTAACTGCACATGCTTTCATTATAATTTTTTTTATAGTTATACCCATTATAATCGGAGGATTCGGAAATTGACTAGTACCCCTCATACTAGGCGCACCCGATATGGCATTCCCACGAATAAACAATATAAGATTTTGACTCCTACCCCCTTCATTAACACTACTTTTAATAAGAAGCATAGTTGAAAGAGGGGCTGGAACAGGGTGAACTGTTTATCCACCTCTATCATCAAACATTGCTCATGGAGGAGCTTCTGTAGACTTGACTATTTTTAGTCTCCATCTAGCAGGAATCTCATCAATTTTAGGTGCAGTAAATTTTATTACTACAGTAATCAACATAAAACCCCAAGGAATAACACTTGACCGTATACCCCTGTTTGCATGAGCTGTAGTAATCACAGCAGTTCTTTTACTATTATCATTGCCAGTTCTAGCCGGAGCAATCACAATATTATTAACAGATCGAAATATTAACACCTCATTCTTTGATCCTGCGGGAGGAGGAGATCCTATTTTATACCAGCACCTATTT
>PSFOR1039-14|PASSIFOR-NM13-059|Mycetophagus decempunctatus|COI-5P
AACTTTATATTTTTTATTTGGTATATGAGCAGGAATATTAGGAACTTCCTTAAGAATTTTAATTCGTCTTGAATTAGGAATGTCAGGAAGATTAATTGGAAATGACCAAATTTATAATGTTATTGTTACAGCTCATGCCTTTATTATAATTTTTTTTATAGTTATACCAATTATAATTGGGGGATTCGGAAACTGATTAGTTCCGTTAATAATTGGAGCCCCAGATATAGCTTTTCCACGTTTAAATAATATAAGATTTTGATTATTACCCCCTGCTTTAACTCTTTTAATTTTAAGAAGAATAATAGAAAGAGGGGCTGGAACAGGATGAACTGTATATCCACCTTTATCATCTAATATTGCTCATAGAGGATCCTCTGTTGATTTAGCAATTTTTAGATTACACTTAGCAGGAATTTCCTCTATTCTTGGAGCAGTAAATTTTATTACAACAATTATTAATATACGACCTACAGGAATAACTTTAGAAAAAACTCCTTTATTTGTTTGATCAGTATTTATTACTGCAATCCTTTTACTTTTATCATTACCTGTTCTTGCTGGAGCAATTACTATATTATTAACAGATCGTAATATAAATACTTCATTTTTTGACCCTTCTGGAGGAGGAGACCCAATTTTATATCAACATTTATTT
>PSFOR187-13|BC-PNEF-PSFOR0159|Mycetophagus fulvicollis|COI-5P
AACATTATATTTTATTTTTGGAGCTTGAGCTGGAATAGTAGGAACATCCCTTAGCCTACTAATTCGGTCAGAGTTAGGAAACCCTGGTTCATTAATTGGAGACGATCAAATTTATAATGTAATTGTTACAGCTCATGCTTTTATCATAATTTTTTTTATAGTTATGCCTATTATAATAGGAGGATTTGGAAATTGACTAGTACCCTTAATACTAGGAGCTCCTGATATGGCTTTCCCACGAATAAACAACATAAGATTTTGATTGCTTCCCCCATCTCTGACTCTCTTAATTATAAGAAGAATCGTTGAAAATGGTGCAGGGACTGGATGAACTGTTTACCCCCCTCTTTCATCCAATATTGCTCATAGAGGATCTTCTGTTGATTTAGCTATTTTTAGTTTACATTTAGCTGGGATCTCTTCAATTTTAGGAGCAGTTAATTTTATTACCACAATTATTAACATACGGCCCAAAGGAATAACGTTTGATCGAATACCTTTATTTGTTTGGGCTGTAGGAATTACAGCTTTACTGCTTCTTCTTTCTTTACCTGTGCTTGCTGGTGCAATTACTATACTTTTAACAGATCGAAATTTAAATACATCTTTTTTTGATCCAGCAGGAGGAGGAGACCCTATTCTCTATCAACATTTATTT
>PSFOR188-13|BC-PNEF-PSFOR0160|Mycetophagus multipunctatus|COI-5P
----------------------------------------------------------------------------------------------------------------------------------------------------------------------------------------------AATTGATTAGTCCCTTTAATATTAGGCGCCCCTGATATAGCTTTTCCCCGAATAAATAATATAAGATTTTGATTGCTCCCACCTTCATTAACTTTATTAATTATAAGAAGAATTGTTGAAAATGGGGCTGGTACAGGATGAACAGTTTACCCACCTTTATCTGCTAATATTGCCCATAGAGGGTCTTCTGTAGATTTAGCTATTTTTAGACTACATTTAGCTGGAATTTCTTCTATTTTAGGTGCTGTAAATTTTATTACTACAATTATTAACATACGGCCAAAAGGAATAACTTTTGATCGTATACCTTTATTTGTTTGAGCAGTAGCTATTACTGCTTTATTACTTCTTCTTTCTTTACCTGTTCTTGCTGGAGCAATTACTATACTTTTAANAGATCGAAATTTAAATACTTCATTTTTTGATCCTGCAGGAGGAGGTGATCCAATTTTATATCAACATTTATTT
>PSFOR357-13|BC-PNEF-PSFOR0329|Mycetophagus piceus|COI-5P
--------------------------------------------------------------------------------------GCTCATTAATTGGAGATGACCAAATTTATAATGTAATTGTTACAGCCCATGCTTTTATTATAATTTTTTTTATAGTTATACCTATTATAATAGGAGGATTTGGAAACTGACTTGTCCCTTTAATATTAGGTGCACCTGATATAGCATTCCCTCGAATAAATAACATAAGATTTTGACTTTTACCACCTTCTCTAACTTTATTAATCATAAGAAGAATCGTAGAAAATGGAGCAGGTACAGGATGAACAGTTTACCCCCCACTGTCTTCTAATATTGCACATAGAGGTTCTTCAGTAGATTTAGCTATTTTTAGCTTACATTTAGCTGGAATTTCTTCTATTTTAGGGGCAGTAAATTTTATTACTACTATCATTAATATACGTCCCCAAGGAATAACTTTTGATCGAATACCATTATTTGTATGAGCTGTAGGAATTACTGCTTTACTCCTTCTCTTGTCATTACCGGTTCTTGCTGGAGCAATTACAATATTATTAACTGATCGAAATTTAAATACATCTTTTTT----------------------------------------------
>PSFOR360-13|BC-PNEF-PSFOR0332|Mycetophagus populi|COI-5P
AACATTATATTTTATTTTTGGAGCCTGATCAGGAATAGTAGGAACTTCCCTTAGCCTATTAATTCGATCAGAGTTAGGAAACCCAGGTTCATTAATTGGGGATGACCAAATTTATAATGTAATTGTTACAGCACATGCTTTTATTATAATTTTTTTTATGGTTATGCCTATTATAATAGGAGGATTTGGAAATTGACTAGTACCCTTAATACTAGGCGCTCCAGATATAGCTTTTCCCCGAATAAACAATATAAGATTTTGATTATTACCCCCTTCTTTAATACTTTTAATTATAAGAAGAGTTACAGAAAGAGGGGCCGGCACAGGTTGGACTGTATACCCGCCTTTATCATCCAACATTGCACATAGAGGTCCATCTGTTGATTTAGCTATTTTTAGTTTACATTTAGCTGGAATTTCTTCAATTTTAGGTGCAGTAAATTTTATTACAACAATTATTAATATACGCCCCAGAGGAATATCTTTTGACCGAATACCCTTATTTGTCTGAGCTATTGGAATTACCGCATTACTTTTACTTTTATCTCTACCAGTTTTAGCAGGTGCAATTACAATACTTTTAACAGACCGAAATTTAAATACATCTTTTTTTGATCCCGCAGGAGGGGGTGACCCAATTTTATACCAACACTTATTT
>PSFOR359-13|BC-PNEF-PSFOR0331|Mycetophagus quadriguttatus|COI-5P
AACTTTATATTTTATTTTTGGAGCCTGAGCAGGAATAGTAGGAACATCCCTTAGCTTACTAATTCGCTCAGAACTAGGTAATCCAGGTTCTTTAATTGGAGACGACCAAATTTATAATGTAATCGTTACTGCTCATGCTTTCATTATAATTTTTTTTATAGTTATACCTATTATAATAGGTGGATTTGGAAATTGACTAGTACCCTTAATACTAGGCGCCCCAGATATAGCTTTTCCTCGTATAAATAATATGAGATTTTGACTACTTCCACCTTCTTTAACTTTACTAATTATAAGAAGAATTGTAGAAAACGGAGCAGGCACAGGATGAACTGTTTACCCTCCTCTATCCTCAAATATTGCCCACAGAGGATCCTCTGTAGATTTAGCTATTTTTAGACTACATTTAGCAGGAATTTCTTCAATTTTAGGAGCAGTAAATTTTATTACCACTATTATTAACATACGACCTAAAGGAATAACCTTTGACCGAATACCTTTATTTGTATGGGCTGTAGGAATTACAGCTTTATTACTTCTTCTTTCATTACCTGTATTAGCTGGTGCAATTACAATACTTTTAACAGACCGAAATTTAAATACCTCTTTTTTTGATCCTGCAGGAGGTGGAGACCCAATCTTATATCAACATTTATTT
>PSFOR463-13|BC-PASSIFOR0036|Mycetophagus quadripustulatus|COI-5P
-----------------------------------------------------------------------------------------------------------------------------------------------------------------------------------------------------------------------------------------------------------TAAGATTCTGATTACTCCCTCCTTCTTTAACTCTTCTAATCATAAGAAGAATTGTTGAAAATGGTGCAGGAACTGGATGAACAGTTTATCCCCCACTGTCCTCCAATATTGCACATAGAGGTTCTTCTGTTGATCTAGCTATTTTTAGATTACATTTAGCTGGTATTTCATCTATTCTTGGAGCAGTAAATTTTATTACTACTATTATTAATATACGACCTCAAGGAATAACCTTTGATCGAATACCATTATTTGTTTGGGCAGTAGGTATTACTGCTCTTCTTCTTCTTTTATCATTACCAGTTCTTGCCGGAGCAATTACTATATTATTAACAGATCGAAACTTAAATACTTCATTTTTTGATCCTGCTGGAGGAGGAGATCCAATTTTATATCAACATTTATTT
>PSFOR897-14|BC-PASSIFOR0116|Nacerdes carniolica|COI-5P
TACACTTTATTTAATTTTTGGTGCATGAGCAGGAATAATTGGTACTTCCTTGAGACTTTTAATTCGAACTGAATTAGGAAACCCTGGATCCTTAATTGGAGACGACCAAATTTATAATGTAATTGTAACAGCACATGCTTTTATTATAATTTTTTTTATAGTTATACCTATTGTTATTGGAGGATTTGGAAATTGATTGGTACCTTTAATATTAGGTGCCCCTGATATAGCTTTCCCTCGAATAAATAATATAAGATTTTGATTATTACCCCCATCTCTAACTTTATTAATCATAAGAAGAGTAGTAGAAAATGGAGCAGGAACAGGATGAACAGTGTACCCCCCACTATCATCTAATATTGCTCACAGAGGATCATCTGTAGATTTAGCTATTTTCAGACTCCATCTAGCAGGTATTTCTTCTATTTTAGGTGCAGTAAATTTTATTACTACTGTTATTAATATACGACCCGTTGGAATAACTCTTGATCGAATACCTTTATTTGTTTGAGCAGTAGTAATTACTGCTGTTCTTTTACTTCTTTCTCTTCCTGTATTAGCAGGAGCAATTACTATGCTACTTACAGATCGAAATTTAAATACTTCATTTTTTGACCCAGCAGGAGGCGGAGATCCAATTCTCTACCAACATTTATTC
>PSFOR981-14|PASSIFOR-NM13-001|Nacerdes carniolica|COI-5P
TACACTTTATTTAATTTTTGGTGCATGAGCAGGAATAATTGGTACTTCCTTGAGACTTTTAATTCGAACTGAATTAGGAAACCCTGGATCCTTAATTGGAGACGACCAAATTTATAATGTAATTGTAACAGCACATGCTTTTATTATAATTTTTTTTATAGTTATACCTATTGTTATTGGAGGATTTGGAAATTGATTGGTACCTTTAATATTAGGTGCCCCTGATATAGCTTTCCCTCGAATAAATAATATAAGATTTTGATTATTACCCCCATCTCTAACTTTATTAATCATAAGAAGAGTAGTAGAAAATGGAGCAGGAACAGGATGAACAGTGTACCCCCCACTATCATCTAATATTGCTCACAGAGGATCATCTGTAGATTTAGCTATTTTCAGACTCCATCTAGCAGGTATTTCTTCTATTTTAGGTGCAGTAAATTTTATTACTACTGTTATTAATATACGACCCGTTGGAATAACTCTTGATCGAATACCTTTATTTGTTTGAGCAGTAGTAATTACTGCTGTTCTTTTACTTCTTTCTCTTCCTGTATTAGCAGGAGCAATTACTATGCTACTTACAGATCGAAATTTAAATACTTCATTTTTTGACCCAGCAGGAGGCGGAGATCCAATTCTCTACCAACATTTATTC
>PSFOR214-13|BC-PNEF-PSFOR0186|Nalassus assimilis|COI-5P
AACACTTTACTTCATCTTTGGCGCATGGTCAGGTATGGTAGGAACCTCTTTAAGACTCCTAATTCGAGCAGAACTAGGAAACCCCGGGTCTTTAATTGGAGACGACCAAATCTATAATGTAATCGTTACAGCCCATGCATTTATCATAATTTTTTTCATAGTTATACCTATTATAATTGGAGGCTTTGGAAACTGGCTTGTACCTCTTATACTCGGAGCACCAGATATGGCTTTCCCTCGAATAAACAACATAAGATTTTGGCTTCTTCCACCTTCTCTAACCCTTCTTCTAATAAGAAGAATCGTAGAAAATGGAGCTGGGACAGGATGAACAGTTTACCCGCCGCTCTCCTCAAACATCGCACATAGAGGATCTTCCGTTGACCTGGCAATTTTTAGTCTTCATTTGGCAGGAGTTTCTTCAATTCTTGGTGCAGTAAATTTTATTACAACTGTAATCAACATACGACCCCAGGGAATAACCTTCGATCGAATACCATTGTTTGTTTGATCAGTAGTTATCACTGCTGTTCTACTCCTACTCTCTCTCCCTGTTCTTGCTGGAGCAATCACTATATTATTAACAGACCGAAATATTAATACATCATTTTTTGACCCTGCGGGAGGTGGAGACCCCATTCTTTACCAACACCTATTC
>PSFOR215-13|BC-PNEF-PSFOR0187|Nalassus dryadophilus|COI-5P
AACACTTTACTTCATCTTTGGCGCATGATCAGGAATAGTAGGAACATCTCTTAGACTCTTGATTCGAGCAGAACTGGGTAACCCCGGATCTCTAATTGGAGACGATCAAATCTACAACGTAATTGTTACAGCCCATGCATTCATCATAATTTTCTTCATAGTTATACCCATTATAATTGGGGGATTTGGAAACTGACTCGTCCCTCTAATACTTGGTGCACCAGATATAGCATTCCCACGAATAAACAATATAAGATTCTGACTTTTACCCCCCTCCCTTACTCTTCTCCTAATAAGAAGAATTGTAGAAAACGGGGCCGGAACAGGATGAACTGTCTATCCACCCCTTTCATCCAACATTGCTCATGGCGGATCCTCTGTTGACCTAGCAATTTTCAGACTACACTTAGCAGGAGTCTCCTCTATTCTAGGAGCAGTAAACTTTATTACAACAGTAATCAATATACGACCCCAAGGAATAACATTTGATCGAATACCACTGTTTGTCTGATCAGTGGTTATTACCGCAGTTCTACTTCTTTTATCCCTACCAGTACTTGCTGGAGCAATCACCATATTACTTACAGATCGAAATATTAATACATCATTTTTTGACCCCGCAGGAGGAGGAGACCCTATCCTTTACCAGCATTTATTT
>PSFOR217-13|BC-PNEF-PSFOR0189|Nalassus dryadophilus|COI-5P
AACACTTTACTTCATCTTTGGCGCATGATCAGGAATAGTAGGAACATCTCTTAGACTCTTGATTCGAGCAGAACTGGGTAACCCCGGATCTCTAATTGGAGACGATCAAATCTACAACGTAATTGTTACAGCCCATGCATTCATCATAATTTTCTTCATAGTTATACCCATTATAATTGGGGGATTTGGAAACTGACTCGTCCCTCTAATACTTGGTGCACCAGATATAGCATTCCCACGAATAAACAATATAAGATTCTGACTTTTACCCCCCTCCCTTACTCTTCTCCTAATAAGAAGAATTGTAGAAAACGGGGCCGGAACAGGATGAACTGTCTATCCACCCCTTTCATCCAACATTGCTCATGGCGGATCCTCTGTTGACCTAGCAATTTTCAGACTACACTTAGCAGGAGTCTCCTCTATTCTAGGAGCAGTAAACTTTATTACAACAGTAATCAATATACGACCCCAAGGAATAACATTTGATCGAATACCACTGTTTGTCTGATCAGTGGTTATTACCGCAGTTCTACTTCTTTTATCCCTACCAGTACTTGCTGGAGCAATCACCATATTACTTACAGATCGAAATATTAATACATCATTTTTTGACCCCGCAGGAGGAGGAGACCCTATCCTTTACCAGCATTTATTT
>PSFOR930-14|BC-PNEF-PSFOR0705|Nalassus ecoffeti|COI-5P
AACACTTTACTTCATCTTTGGAGCATGATCAGGAATGGTAGGCACCTCCCTCAGACTTCTGATCCGAGCAGAACTAGGAAACCCTGGATCCCTAATTGGAGACGATCAAATTTACAATGTAATCGTTACAGCCCACGCATTTATTATAATTTTCTTCATGGTAATGCCAATTATAATCGGAGGATTCGGAAATTGACTAGTACCTCTTATATTGGGTGCCCCAGACATGGCCTTCCCTCGAATAAACAACATAAGATTTTGATTACTGCCACCCTCCTTAACCCTCCTATTAATAAGAAGAATTGTAGAAAATGGGGCGGGAACAGGATGAACCGTTTACCCCCCTCTCTCATCCAATATTGCCCACGGCGGGTCATCTGTTGACCTGGCAATTTTTAGGCTTCATCTGGCCGGGATCTCCTCAATTCTGGGTGCCGTAAATTTCATTACAACTGTGATCAATATACGGCCCCAAGGAATAACCTTCGATCGAATACCTTTATTTGTATGATCAGTAGTAATTACTGCTGTACTTCTTCTTCTTTCCCTACCAGTACTGGCTGGAGCAATTACTATATTACTCACTGACCGAAATATCAACACGTCATTCTTTGACCCTGCAGGAGGAGGAGACCCTATCCTCTACCAACATCTCTTT
>PSFOR927-14|BC-PNEF-PSFOR0702|Nalassus ecoffeti|COI-5P
AACACTTTACTTCATCTTTGGAGCATGATCAGGTATGGTAGGCACCTCCCTCAGACTTCTGATCCGAGCAGAACTAGGAAACCCTGGATCCCTAATTGAAGACGATCAAATTTATAATGTAATCGTTACAGCCCACGCATTTATTATAATTTTCTTCATAGTAATACCAATCATAATCGGAGGGTTCGGAAATTGACTAGTACCTCTAATATTGGGTGCCCCAGACATGGCCTTCCCTCGAATAAACAACATAAGATTTTGATTACTGCCACCCTCCTTAACCCTCCTATTAATAAGAAGAATTGTAGAAAATGGAGCAGGAACAGGATGAACCGTTTACCCCCCTCTCTCATCCAATATTGCCCACGGCGGGTCATCCGTTGACCTAGCAATTTTTAGGCTTCATCTGGCCGGGATCTCCTCAATTCTGGGTGCAGTAAATTTCATTACAACTGTAATCAATATACGACCCCAAGGAATAACCTTCGATCGAATACCTTTATTTGTATGATCAGTAGTAATTACTGCTGTACTTCTCCTTCTTTCCCTACCAGTACTGGCTGGAGCAATTACTATATTACTCACTGACCGAAATATCAACACGTCATTCTTTGACCCTGCGGGAGGAGGAGACCCTATCCTCTACCAACATCTCTTT
>PSFOR394-13|BC-PNEF-PSFOR0366|Nalassus ecoffeti|COI-5P
----------------------------------ATGGTGGGAACCTCCCTCAGACTTCTGATCCGAGCAGAACTAGGAAACCCTGGATCCCTAATTGGAGACGATCAAATTTACAATGTAATCGTTACAGCCCACGCATTTATTATAATTTTCTTCATGGTAATACCAATTATAATCGGGGGGTTCGGAAATTGACTCGTCCCTCTTATATTGGGTGCCCCAGACATAGCCTTCCCCCGAATAAACAACATAAGATTTTGATTACTACCACCATCCTTAACCCTCCTATTAATAAGAAGAATTGTAGAAAGCGGAGCAGGGACAGGATGAACCGTTTACCCCCCTCTCTCATCCAATATTGCCCACAGCGGGTCATCCGTTGACCTGACAATTTTCAGACTTCACCTGGCCGGAATCTCCTCAATTCTAGGCGCCGTAAATTTCATTACAACCGTGATCAATATGCGACCCCAGGGAATAACCTTCGATCGAATACCTTTATTTGTATGATCAGTAGTAATTACTGCTGTACTCCTCCTCCTTTCCCTCCCAGTGCTGGCTGGAGCAATTACTATATTACTCACTGACCGAAATATCAACACGTCATTCTTTGACCCTGCAGGAGGTGGAGACCCTATCCTATACCAACATCTATTT
>PSFOR216-13|BC-PNEF-PSFOR0188|Nalassus ecoffeti|COI-5P
AACACTTTACTTCATCTTTGGAGCATGATCCGGCATAGTGGGTACTTCTCTTAGACTGCTAATTCGAGCAGAACTGGGAAACCCTGGATCCCTAATTGGAGATGATCAAATTTACAACGTAATCGTTACAGCTCACGCATTCATCATAATTTTCTTCATAGTTATGCCAATTATAATTGGGGGATTCGGAAATTGACTTGTCCCCCTTATACTGGGAGCACCAGACATGGCTTTCCCCCGAATAAACAACATAAGATTTTGGCTTCTCCCGCCTTCCCTGACCCTTCTATTAATAAGAAGAATTGTAGAAAATGGAGCAGGAACAGGCTGAACTGTTTACCCCCCACTCTCATCTAATATTGCCCACGGCGGGTCATCTGTTGACCTGGCAATTTTTAGACTACACCTAGCTGGAATCTCTTCAATTCTGGGGGCTGTAAATTTCATTACAACTGTAATCAATATACGACCTCAAGGAATAACTTTTGATCGAATACCTTTATTTGTATGATCAGTAGTAATCACTGCTGTACTCCTTCTTCTCTCCCTCCCAGTTCTAGCCGGAGCAATTACTATATTACTTACCGATCGAAACATTAATACATCCTTCTTCGACCCTGCGGGAGGAGGAGATCCTATCCTCTACCAACACTTATTT
>PSFOR925-14|BC-PNEF-PSFOR0700|Nalassus ecoffeti|COI-5P
AACACTTTACTTCATCTTTGGAGCATGATCAGGAATGGTAGGAACCTCCCTCAGACTCCTAATCCGAGCAGAACTAGGAAACCCCGGATCCCTAATTGGAGACGATCAAATTTACAATGTAATCGTTACAGCCCACGCATTTATTATAATTTTCTTCATGGTAATACCAATTATAATTGGAGGATTTGGAAATTGACTTGTCCCTCTTATGCTGGGTGCCCCAGACATGGCCTTCCCCCGAATAAACAATATAAGATTTTGATTACTCCCACCCTCCTTGACCCTTCTATTAATAAGAAGAATTGTGGAAAACGGGGCAGGAACAGGATGAACCGTTTACCCCCCTCTCTCATCCAATATTGCCCACGGCGGGTCATCCGTTGACCTGGCAATTTTCAGGTTACATCTGGCCGGAATCTCCTCAATCCTGGGCGCCGTAAATTTCATTACAACCGTGATTAATATGCGACCCCAAGGAATAACCTTCGATCGAATGCCTTTATTTGTATGATCAGTAGTAATTACCGCTGTACTCCTTCTTCTATCCCTTCCAGTACTGGCCGGAGCAATCACCATGCTACTTACTGACCGAAACATCAACACATCATTCTTTGACCCTGCAGGAGNAGGAGACCCCATCCTCTACCAACACCTATTC
>PSFOR388-13|BC-PNEF-PSFOR0360|Nalassus laevioctostriatus|COI-5P
AACACTTTATTTCATCTTTGGAGCATGATCAGGCATAGTAGGAACCTCTTTAAGACTTCTTATTCGAGCAGAACTGGGTAACCCAGGCTCCTTAATTGGAGACGATCAAATTTACAACGTAATCGTTACAGCTCATGCATTCATTATAATTTTCTTTATAGTTATACCAATTATAATTGGGGGATTTGGAAATTGACTTGTACCATTAATATTAGGTGCACCAGATATAGCCTTCCCTCGAATAAACAATATAAGATTCTGACTTCTGCCTCCCTCGTTAACTCTACTTTTAATAAGAAGAATCGTAGAAAATGGTGCAGGAACAGGATGAACAGTTTACCCCCCTCTCTCATCTAACATTGCCCATGGTGGATCATCTGTTGATTTAGCAATTTTCAGACTCCACCTTGCAGGAATTTCATCAATTCTTGGAGCTGTAAATTTCATTACAACCGTAATTAATATACGACCTCAGGGAATAACTTTTGACCGAATACCTTTATTTGTATGATCAGTTGTAATTACTGCTGTACTCCTTCTCCTTTCTCTACCTGTTCTAGCTGGAGCAATCACTATACTACTTACAGACCGGAATATTAATACTTCATTCTTCGACCCAGCTGGTGGAGGAGACCCTATTCTCTATCAACACTTATTT
>PSFOR1068-14|PASSIFOR-NM13-088|Nalassus laevioctostriatus|COI-5P
----------------------------------------GGAACCTCTTTAAGACTTCTTATTCGAGCAGAACTGGGTAACCCAGGCTCCTTAATTGGAGACGATCAAATTTACAACGTAATCGTTACAGCTCATGCATTCATTATAATTTTCTTTATAGTTATACCAATTATAATTGGAGGATTTGGAAATTGACTTGTACCATTAATATTAGGTGCACCAGATATAGCCTTCCCTCGAATAAACAATATAAGATTCTGACTTCTGCCTCCCTCGTTAACTCTACTTTTAATAAGAAGAATCGTAGAAAATGGTGCAGGAACAGGATGAACAGTTTACCCCCCTCTCTCATCTAATATTGCCCATGGTGGATCATCTGTTGACTTAGCAATTTTCAGACTTCACCTTGCAGGAATTTCATCAATTCTTGGAGCTGTAAATTTCATTACAACCGTAATTAATATACGACCTCAGGGAATAACTTTTGACCGAATACCTTTATTTGTATGATCAGTTGTAATTACTGCTGTACTCCTTCTCCTTTCTCTACCTGTTCTAGCTGGAGCAATCACTATACTACTTACAGACCGAAATATTAATACTTCATTCTTCGACCCAGCTGGTGGAGGAGACCCTATTCTCTATCAACACTTATTT
>PSFOR234-13|BC-PNEF-PSFOR0206|Nalassus laevioctostriatus|COI-5P
AACACTTTATTTCATCTTTGGAGCATGATCAGGCATAGTAGGAACCTCTTTAAGACTTCTTATTCGAGCAGAACTGGGTAACCCAGGCTCCTTAATTGGAGACGATCAAATTTACAACGTAATCGTTACAGCTCATGCATTCATTATAATTTTCTTTATAGTTATACCAATTATAATTGGGGGATTTGGAAATTGACTTGTACCATTAATATTAGGTGCACCAGATATAGCCTTCCCTCGAATAAACAATATAAGATTCTGACTTCTGCCTCCCTCGTTAACTCTACTTTTAATAAGAAGAATCGTAGAAAATGGTGCAGGAACAGGATGAACAGTTTACCCCCCTCTCTCATCTAACATTGCCCATGGTGGATCATCTGTTGATTTAGCAATTTTCAGACTCCACCTTGCAGGAATTTCATCAATTCTTGGAGCTGTAAATTTCATTACAACCGTAATTAATATACGACCTCAGGGAATAACTTTTGACCGAATACCTTTATTTGTATGATCAGTTGTAATTACTGCTGTACTCCTTCTCCTTTCTCTACCTGTTCTAGCTGGAGCAATCACTATACTACTTACAGACCGGAATATTAATACTTCATTCTTCGACCCAGCTGGTGGAGGAGACCCTATTCTCTATCAACACTTATTT
>PSFOR064-13|BC-PNEF-PSFOR0036|Nathrius brevipennis|COI-5P
--------------------------GAGCAAGAATAGTAGGAACATCGCTAAGGATTTTAATTCGAACAGAACTAGGCAACCCAGGTTCACTGATTGGAGACGACCAGATTTATAATGTAATTGTAACAGCACATGCATTTGTCATAATTTTTTTTATAGTAATACCAATCATAATTGGGGGCTTCGGGAACTGATTAATTCCACTAATACTCAGATCACCCGATATAGCTTTCCCTCGAATAAACAATATAAGATTCTGACTTTTACCCCCATCCCTTACCTTGCTAATTGCAAGAAGAATCATCGAAAATGGGGCAGGAACAGGATGAACCGTTTACCCCCCATTAGCAAGAATGATCGCCCATAGAGGGTCCTCTGTTGACATAGCAATTTTTAGCCTACATCTAGCAGGAATTTCATCAATCTTGGGAGCCGTTAATTTCATCTCTACAATAATCAATATACGACCAACAGAANTAAATATAGACCAAACTCCCCTGTTCTCTTGAGCTGTAATAATTACCGCAATTCTCCTACTTTTATCTCTTCCCGTGCTGGCAGGAGCAATCACCATACTCTTAACCGACCGAAATATTAATACTTCCTTCTTTGACCCAGCAGGAGGGGGAGATCCAGTTCTATACCAACACCTATTC
>PSFOR133-13|BC-PNEF-PSFOR0105|Necydalis ulmi|COI-5P
AACCCTATATTTTATTTTTGGGGCATGATCAGGTATAATAGGAACATCTTTAAGAATCTTAATTCGTTCAGAATTAGGTAATTCAGGACCATTAATTGGAGATGATCAAATTTATAATGTAATTGTTACAGCCCATGCTTTTGTAATAATTTTTTTTATAGTTATACCTATTATAATTGGAGGATTCGGAAATTGACTTGTACCACTAATATTGGGTGCCCCTGATATAGCTTTTCCACGAATAAATAACATAAGATTCTGATTATTACCCCCATCTCTTATTCTATTAATTATAAGAAGAGTAGTAGAAAATGGGGCAGGAACAGGATGAACTGTCTATCCACCCCTTTCAGCTAATATTGCCCATAGAGGTTCATCAGTTGATTTAACAATTTTCAGGCTTCATTTAGCAGGAATTTCTTCAATTCTTGGAGCTGTAAATTTTATTTCTACCATTATTAATATACGACCAAAAGGAATAAAATTTGATCAACTATCTTTATTTACATGAGCTGTAATAATTACCACAATTTTACTTTTATTATCTCTTCCAGTTTTGGCTGGAGCAATTACAATATTATTAACAGATCGAAATTTAAATACCTCATTCTTTGACCCTGCTGGAGGTGGGGATCCCATTCTTTATCAACATTTATTT
>PSFOR552-13|BC-PNEF-PSFOR0429|Nemozoma cornutum|COI-5P
AACCCTATACTTCATTTTTGGTGCTTGAGCTGGAATAGTAGGTACTTCTCTTAGTATACTAATCCGTTCAGAATTAGGTAATCCTGGAAGCCTAATTGGAAATGACCAAATCTACAACGTTATTGTTACAGCCCATGCCTTCATTATAATTTTCTTTATAGTTATACCAATTATAATTGGTGGATTCGGAAACTGATTAGTTCCACTAATATTGGGAGCCCCAGATATAGCATTCCCTCGAATAAACAATATAAGATTCTGATTATTACCTCCGTCTCTTTCTCTTTTGTTAATAAGAAGAATAGTAGAAAACGGTGCAGGGACTGGATGAACAGTTTACCCACCCCTTTCATCAAACATTGCTCATGGAGGATCATCTGTTGATCTAGCAATTTTTAGTCTTCATCTAGCTGGAATTTCTTCAATTCTTGGAGCCGTAAATTTTATTACTACAGTAATCAATATACGGCCAGCTGGAATAACTTTAGACCGTGTCCCCCTATTTGTTTGAGCAGTAGCAATTACTGCTCTTCTCCTCCTTTTGTCCTTGCCTGTACTAGCAGGAGCAATTACTATACTATTAACAGACCGAAATTTAAATACTACATTTTTTGATCCAGCTGGAGGAGGAGACCCAATCTTATACCAACACCTATTC
>PSFOR551-13|BC-PNEF-PSFOR0428|Nemozoma elongatum|COI-5P
AACCTTATACTTCATCTTTGGTGCTTGAGCTGGAATAGTAGGTACTTCCCTTAGTATATTAATCCGCTCAGAATTAGGTAATCCTGGAAGCCTAATTGGAAATGACCAAATCTACAACGTTATTGTTACAGCCCATGCCTTCATCATAATTTTTTTTATAGTTATACCAATCATAATTGGTGGATTCGGAAACTGATTAGTCCCACTGATATTAGGAGCCCCAGATATAGCATTCCCTCGAATAAATAATATAAGATTTTGATTGTTACCTCCATCCCTTTCCCTATTGTTAATAAGAAGAATAGTAGAAAACGGTGCAGGAACTGGGTGAACAGTTTACCCTCCCCTCTCATCAAATATTGCTCATGGAGGTTCTTCTGTTGACTTAGCAATTTTCAGCCTTCATCTTGCAGGAATCTCCTCAATTCTTGGTGCCGTAAATTTCATTACTACAGTAATTAATATACGGCCAGCAGGAATGACACTAGATCGTGTACCATTATTTGTTTGGGCAGTAGCAATTACTGCCCTCCTTCTTCTTCTTTCCCTCCCAGTTTTAGCAGGAGCTATTACTATACTACTAACAGACCGAAACCTAAATACTACATTTTTCGACCCAGCTGGGGGAGGAGACCCAATTTTATATCAACATTTATTC
>PSFOR387-13|BC-PNEF-PSFOR0359|Nemozoma elongatum|COI-5P
AACCTTATACTTCATCTTTGGTGCTTGAGCTGGAATAGTAGGTACTTCCCTTAGTATATTAATCCGCTCAGAATTAGGTAATCCTGGAAGCCTAATTGGAAATGACCAAATCTACAACGTTATTGTTACAGCCCATGCCTTCATCATAATTTTTTTTATAGTTATACCAATCATAATTGGTGGATTCGGAAACTGATTAGTCCCACTGATATTAGGAGCCCCAGATATAGCATTCCCTCGAATAAATAATATAAGATTTTGATTGTTACCTCCATCCCTTTCCCTATTGTTAATAAGAAGAATAGTAGAAAACGGTGCAGGAACTGGGTGAACAGTTTACCCTCCCCTCTCATCAAATATTGCTCATGGAGGTTCTTCTGTTGACTTAGCAATTTTCAGCCTTCATCTTGCAGGAATCTCCTCAATTCTTGGTGCCGTAAATTTCATTACTACAGTAATTAATATACGGCCAGCAGGAATGACACTAGATCGTGTACCATTATTTGTTTGGGCAGTAGCAATTACTGCCCTCCTTCTTCTTCTTTCCCTCCCAGTTTTAGCAGGAGCTATTACTATACTACTAACAGACCGAAACCTAAATACTACATTTTTCGACCCAGCTGGGGGAGGGGACCCAATTTTATATCAACATTTATTC
>PSFOR475-13|BC-PASSIFOR0048|Nemozoma elongatum|COI-5P
-----------------------------------------------------------------------------------------------------------------------------------------------------------------------------------------------------------------------------------------------------------TAAGATTTTGATTGTTACCTCCATCCCTTTCCCTATTGTTAATAAGAAGAATAGTAGAAAACGGTGCAGGAACTGGGTGAACAGTTTACCCTCCCCTCTCATCAAATATTGCTCATGGAGGTTCTTCTGTTGACTTAGCAATTTTCAGCCTTCATCTTGCAGGAATCTCCTCAATTCTTGGTGCCGTAAATTTCATTACTACAGTAATTAATATACGGCCAGCAGGAATGACACTAGATCGTGTACCATTATTTGTTTGGGCAGTAGCAATTACTGCCCTCCTTCTTCTTCTTTCCCTCCCAGTTTTAGCAGGAGCTATTACTATACTACTAACAGACCGAAACCTAAATACTACATTTTTCGACCCAGCTGGGGGAGGAGACCCAATTTTATATCAACATTTATTC
>PSFOR065-13|BC-PNEF-PSFOR0037|Niphona picticornis|COI-5P
TACTTTATATTTTATTTTTGGTGCATGATCAGGAATAGTAGGAACATCTTTAAGAATACTTATTCGATCAGAATTAGGAAATCCTGGAACTTTAATTGGTAATGATCAAATTTATAATGTTATTGTTACAGCTCATGCTTTTGTAATAATTTTTTTTATAGTTATACCTATCATAATTGGTGGATTTGGAAATTGATTAGTCCCTTTAATATTAGGGGCTCCTGATATAGCTTTTCCACGAATAAATAACATAAGATTTTGATTATTACCTCCTTCATTAACTTTATTACTTATAAGAAGAATTGTAGAAAAAGGCGCAGGAACTGGATGAACAGTTTACCCACCTTTAGCTGCTAATATTGCTCATAATGGAGCCTCTGTAGACTTAGCAATTTTTAGGCTTCACTTAGCTGGAATTTCTTCTATTTTAGGAGCAGTTAATTTTATTACTACAGTAATTAATATACGACCTAGGGGTATATCTTTTGACCGCCTTCCCTTATTTGTTTGAGCAGTTAAAATTACTGCTATTTTATTACTCCTTTCCCTTCCAGTTCTAGCTGGTGCAATCACTATACTTTTAACAGATCGAAACTTAAATACTACATTTTTTGATCCAGCTGGAGGAGGGGATCCAGTTCTTTATCAACATTTATTT
>PSFOR460-13|BC-PASSIFOR0033|Nosodendron fasciculare|COI-5P
-----------------------------------------------------------------------------------------------------------------------------------------------------------------------------------------------------------------------------------------------------------TAAGATTTTGATTATTACCTCCTTCTTTATCTTTATTATTAATAAGAAGAATTATTGAAAATGGAGCAGGAACAGGATGAACAGTTTATCCCCCACTATCATCCAATATTGCACATAGAGGATCTTCAGTTGATTTAGCTATTTTTAGCTTACATTTAGCAGGAATTTCTTCTATCCTAGGAGCAGTTAATTTTATTTCTACAATTATTAATATACGATCAATAGGAATTTGATTTGACCGAATACCTTTATTTGTTTGATCAGTAATTATTACTGCAATTTTATTATTACTTTCTTTACCTGTATTAGCTGGAGCTATTACAATATTATTAACAGATCGAAATTTAAATACTTCATTTTTTGATCCTGCAGGAGG-------------------------------
>PSFOR993-14|PASSIFOR-NM13-013|Nothodes parvulus|COI-5P
AACTTTATACTTCCTGTTCGGAGCATGAGCAGGAATGCTAGGAACATCACTCAGACTCCTAATCCGAGCTGAACTAGGAAACCCCGGCTCATTAATCGGAAACGACCAAATCTATAATGTAATCGTAACCGCACACGCTTTCATCATAATTTTCTTCATAGTTATGCCCATCATAATCGGAGGATTCGGCAACTGACTAGTTCCTCTAATACTAGGAGCCCCTGACATGGCATTCCCCCGAATAAACAACATAAGATTCTGGTTCTTACCCCCTTCCCTTTCCCTACTATTAATAAGAAGAATTGTAGAAAACGGAGCAGGAACTGGATGAACAGTCTACCCACCCCTATCAGCCAACATTGCCCACAGAGGCTCCTCTGTAGACCTTGCAATCTTCAGACTTCATTTAGCAGGTATCTCATCAATTCTAGGGGCAGTAAATTTCATTTCAACCGTAATTAATATACGATCTACAGGTATTACCTTTGACCGTATACCCCTCTTTGTTTGAGCAGTAGCCATTACCGCCCTTCTCCTACTACTGTCCCTCCCAGTACTCGCAGGTGCAATCACAATACTTTTAACTGACCGAAACTTAAACACCTCATTCTTTGACCCTGCAGGGGGAGGAGATCCAATTCTATA-------------
>PSFOR776-13|BC-PNEF-PSFOR0653|Nothodes parvulus|COI-5P
---------------------------------AATGCTAGGAACATCACTCAGACTCCTAATCCGAGCTGAACTAGGAAACCCCGGCTCATTAATCGGAAACGACCAAATCTATAATGTAATCGTAACCGCACACGCTTTCATCATAATTTTCTTCATAGTTATGCCCATCATAATTGGAGGATTCGGCAACTGACTAGTTCCTCTAATACTAGGAGCCCCTGACATGGCATTCCCCCGAATAAACAACATAAGATTCTGGTTCTTACCCCCTTCCCTTTCCCTACTATTAATAAGAAGAATTGTAGAAAACGGAGCAGGAACTGGATGAACAGTCTACCCACCCCTATCAGCCAACATTGCCCACAGAGGCTCCTCTGTAGACCTTGCAATCTTCAGACTTCATTTAGCAGGTATCTCATCAATTCTAGGGGCAGTAAATTTCATTTCAACCGTAATTAATATACGATCTACAGGTATTACCTTTGACCGTATACCCCTCTTTGTTTGAGCAGTAGCCATTACCGCCCTTCTCCTACTACTGTCCCTCCCAGTACTCGCAGGTGCAATCACAATACTTTTAACTGACCGAAACTTAAACACCTCATTCTTTGACCCTGCAGGGGGAGGAGATCCAATTCTATACCAACATCTATTC
>PSFOR1015-14|PASSIFOR-NM13-035|Notolaemus unifasciatus|COI-5P
-----------------------------------------------------------------------------------------------------------------------------TAACAGCCCATGCATTCATTATAATTTTCTTTATAGTTATACCAATTTTAATTGGAGGATTTGGAAATTGACTTATTCCTCTAATACTAGGAGCCCCTGATATAGCATTTCCACGAATGAATAATATAAGATTTTGACTTTTACCCCCATCACTTTCACTTCTTTTAATAAGAAGAATTGTAGAAAAAGGAGCCGGAACTGGATGAACAGTTTACCCCCCGTTATCTTCCAATATTGCCCATGGAGGATCTTCAGTCGATTTAGCTATCTTTAGACTTCATCTTGCTGGCATTTCTTCAATTCTAGGAGCAGTAAATTTTATTTCTACAATTATTAATATACGTCCTATTGGAATATCACTTGAACGAATACCCCTATTTGTTTGAGCTGTTTTAATTACAGCTATTCTTCTTCTTCTTTCACTTCCTGTTTTAGCAGGAGCAATTACAATACTATTAACAGACCGAAACATTAATACCTCATTTTTTGATCCATC-------------------------------------
>PSFOR808-13|BC-PNEF-PSFOR0685|Nycteus meridionalis|COI-5P
GACACTATATTTTTTATTTGGGGCATGAGCTGGAATAGTGGGAACAATTCTTAGATTAATTATTCGAACTGAATTAAGAAATCCTGGATCATTAATTAATGATGATCAAATTTATAATGTTATTGTTACTGCTCACGCTTTTATTATAATTTTTTTTATAATTATACCAATTATAATTGGGGGCTTCGGAAATTGACTTGTACCCCTAATACTAGGAGCGCCTGATATAGCATTTCCACGAATAAATAATATAAGATTTTGATTTCTGCCTCCATCTCTATCTTTACTTTTATGTAGAGCTTTAGTAGAAAAAGGAGCAGGAACAGGTTGAACAGTTTATCCACCTTTATCAGCTAGAATTGCTCATAGAGGATCTTCAGTTGATTTAGCTATTTTTAGACTACATTTAGCAGGAATCTCAAGAATTTTAGGAGCAGTAAACTTTATCTCCACTATTATTAATATACGATCACCAGGAATATTATATGAACAAATACCCTTATTTGTTTGATCTGTAATATTAACAGCAATTTTACTTCTTCTCTCACTACCTGTATTAGCTGGGGCTATCACAATACTTTTAACAGATCGAAATTTTAATACCTCATTTTTTGACCCTGCTGGTGGAGGAGATCCTATCTTATATCAACATCTTTTT
>PSFOR067-13|BC-PNEF-PSFOR0039|Oberea linearis|COI-5P
TACACTTTATTTTATTTTTGGAGCTTGAGCTGCTATAGTAGGAACATCACTTAGATTATTAATTCGATCAGAATTAGGAACCCCCGGATCTTTAATTGGTGATGATCAAATTTATAATGTAATTGTTACTGCTCATGCATTTATTATGATTTTTTTTATAGTAATACCAATTATAATTGGAGGATTTGGAAATTGACTAGTACCCTTAATACTAGGAGCTCCTGATATAGCCTTCCCTCGAATAAATAATATAAGATTTTGACTTCTCCCCCCTTCCCTTAGATTATTAATTATAAGAAGAATTATTGATAATGGAGCAGGAACTGGATGAACGGTATACCCCCCCCTAGCTGCTAATGTAGCACATAATGGTTCATCTGTTGATTTAGCAATTTTTAGGCTACATCTAGCTGGAATTTCTTCTATTCTTGGGGCTGTAAATTTTATTACAACCGTAATTAACATACGACCAAGAGGAATAACTCTAGACCGAATACCCCTATTCGTTTGAGCAGTAAAAATTACAGCTATCTTACTACTTCTTTCATTACCAGTTCTAGCTGGTGCAATTACCATATTATTAACAGATCGAAATTTAAATACCTCCTTTTTTGACCCTGCTGGAGGTGGAGATCCCATTCTTTATCAACATTTATTT
>PSFOR066-13|BC-PNEF-PSFOR0038|Oberea linearis|COI-5P
TACACTTTATTTTATTTTTGGAGCTTGAGCTGCTATAGTAGGAACATCACTTAGATTATTAATTCGATCAGAATTAGGAACCCCCGGATCTTTAATTGGTGATGATCAAATTTATAATGTAATTGTTACTGCTCATGCATTTATTATGATTTTTTTTATAGTAATACCAATTATAATTGGAGGATTTGGAAATTGACTAGTACCCTTAATACTAGGAGCTCCTGATATAGCCTTCCCTCGAATAAATAATATAAGATTTTGACTTCTCCCCCCTTCCCTTAGATTATTAATTATAAGAAGAATTATTGATAATGGAGCAGGAACTGGATGAACGGTATACCCCCCCCTAGCTGCTAATGTAGCACATAATGGTTCATCTGTTGATTTAGCAATTTTTAGGCTACATCTAGCTGGAATTTCTTCTATTCTTGGGGCTGTAAATTTTATTACAACCGTAATTAACATACGACCAAGAGGAATAACTCTAGACCGAATACCCCTATTCGTTTGAGCAGTAAAAATTACAGCTATCTTACTACTTCTTTCATTACCAGTTCTAGCTGGTGCAATTACCATATTATTAACAGATCGAAATTTAAATACCTCCTTTTTTGACCCTGCTGGAGGTGGAGATCCCATTCTTTATCAACATTTATTT
>PSFOR891-14|BC-PASSIFOR0110|Obrium brunneum|COI-5P
TACTTTGTACCTCGTCTTTGGTGCTTGAGCTGGGATGGTAGGCACATCTCTAAGCATCCTAATTCGATCAGAACTTGGCTCTCCCGGATCTCTCATTGGAAATGACCAAATTTACAACGTAATCGTCACAGCTCATGCTTTTGTAATAATTTTCTTCATGGTAATACCAATCATAATCGGAGGGTTCGGAAATTGACTAGTGCCCCTAATACTAGGAGCCCCTGATATAGCATTCCCCCGATTAAACAATCTCAGGTTCTGACTCCTACCCCCATCAATTTTTCTACTAATTAGTGGTAGCCTAGTTGAGAGAGGGGCAGGAACAGGATGAACTGTTTACCCCCCATTATCAAGCAACACAGCTCATAGAGGACCTTCAGTTGATTTAACTATTTTTAGACTTCATCTTGCTGGGATTTCCTCAATTCTCGGAGCAGTTAATTTTATTTCCACAGTAGCAAATATACACCCCGGGGGAATAAAACTAGAACAATTGCCCTTATTCGTATGAGCTGTCTCGATTACTGCTCTTCTACTTCTGCTTTCCCTCCCTGTTTTAGCAGGAGCAATCACTATACTCCTCACAGACCGAAACTTAAATACATCCTTTTTTGATCCAGCAGGTGGGGGAGACCCAGTTCTATACCAACACCTGTTT
>PSFOR676-13|BC-PNEF-PSFOR0553|Ochina latreillei|COI-5P
------------------TGGAGCATGATCAGGAATAGTTGGAACATCACTCAGAATATTAATTCGATCAGAACTAGGAAACCCTGGTGCTCTAATTGGAGACGACCAAATCTATAACGTTATTGTAACAGCCCACGCATTCATTATAATTTTCTTCATAGTCATACCAATTATAATTGGAGGATTCGGAAATTGACTAATCCCTTTAATACTAGGAGCACCTGATATAGCATTTCCACGAATAAATAACATAAGATTTTGGCTTCTACCCCCCTCCCTTAGTCTATTATTAATAAGAAGAGCTGTAGAAAGGGGGGCAGGAACAGGATGAACAGTTTATCCACCCCTATCAGCTAATATTGCACACAGCGGGGCCTCTGTTGATTTAGCTATTTTTAGACTTCACTTAGCTGGTATCTCATCTATTCTCGGAGCAGTAAATTTTATTACTACTGTAATCAATATACGACCCGTTGGAATGTCATTTGATCGAATACCCTTATTCGTCTGATCCGTTGCTATTACTGCCCTTCTTCTTCTTTTATCCTTACCAGTATTAGCAGGAGCAATTACAATACTTCTAACCGACCGTAATTTAAACACATCGTTCTTTGATCCGG--------------------------------------
>PSFOR677-13|BC-PNEF-PSFOR0554|Ochina ptinoides|COI-5P
----------------------------------------------------------------------------------------------------------------------------------------------------------------------------------------------------------------------------------------------------------------------------------------------------------------------------------ACAGGATGGACAGTTTNCCCTCCCCTNTCNGCTAATATAGCTCATAGAGGAGCATCAGTTGACCTAGCAATTTTTAGTTTACATTTAGCAGGAATTTCNTCAATTCTAGGAGCTGTAAATTTTATCACANCCGTAATCAATATACGACCAGTAGGAATAACCCTAGATCGAATGCCTTTATTTGTTTGGTCAGTAGCTATCACAGCCCTTTTATTGCTTTTATCTTTACCTGTTTTAGCAGGAG--------------------------------------------------------------------------------------------
>PSFOR379-13|BC-PNEF-PSFOR0351|Ochina ptinoides|COI-5P
AACACTTTATTTCATTTTTGGAGCATGATCAGGAATAGTAGGAACTTCACTTAGAATACTAATTCGATCCGAATTAGGGAACCCCGGAGCCCTAATTGGAGATGATCAAATCTATAATGTAATTGTTACAGCCCACGCTTTCATTATAATTTTTTTTATAGTTATACCAATTATAATTGGAGGATTTGGAAATTGATTAGTCCCTCTAATACTAGGAGCACCTGACATAGCATTCCCCCGAATAAATAATATAAGATTCTGACTTTTACCTCCATCAATTAGACTTCTATTAATAAGAAGAGCCGTAGAAAGAGGTGCAGGAACAGGATGAACAGTTTACCCTCCCCTATCAGCTAATATAGCTCATAGAGGAGCATCAGTTGACCTAGCAATTTTTAGTTTACATTTAGCAGGAATTTCATCAATTCTAGGAGCTGTAAATTTTATCACAACCGTAATCAATATACGACCAGTAGGAATAACCCTAGATCGAATGCCTTTATTTGTTTGGTCAGTAGCTATCACAGCCCTTTTATTGCTTTTATCTTTACCTGTTTTAGCAGGAGCCATCACAATACTATTAACAGATCGAAATCTTAATACTTCATTTTTTGATCCAGCAGGAGGAGGAGATCCAATTTTATACCAACATTTATTT
>PSFOR991-14|PASSIFOR-NM13-011|Ochina ptinoides|COI-5P
AACACTTTATTTCATTTTTGGAGCATGATCAGGAATAGTAGGAACTTCACTTAGAATACTAATTCGATCCGAATTAGGGAACCCCGGAGCCCTAATTGGAGATGATCAAATCTATAATGTAATTGTTACAGCCCACGCTTTCATTATAATTTTTTTTATAGTTATACCAATCATAATTGGAGGATTTGGAAATTGATTAGTCCCTCTAATACTAGGAGCACCTGACATAGCATTCCCCCGAATAAATAATATAAGATTCTGACTTTTACCTCCATCAATTAGACTTCTATTAATAAGAAGAGCCGTAGAAAGAGGTGCAGGAACAGGATGGACAGTTTACCCTCCCCTATCAGCTAATATAGCTCATAGAGGAGCATCAGTTGACCTAGCAATTTTTAGTTTACATTTAGCAGGAATTTCATCAATTCTAGGAGCTGTAAATTTTATCACAACCGTAATCAATATACGACCAGTAGGAATAACCCTAGATCGAATGCCTTTATTTGTTTGGTCAGTAGCTATCACAGCCCTTTTATTGCTTTTATCTTTACCTGTTTTAGCAGGAGCCATCACAATACTATTAACAGATCGAAATCTTAATACTTCATTTTTTGATCCAGCAGGAGGAGGAGATCCAATTTTATACCAACATTTATTT
>PSFOR671-13|BC-PNEF-PSFOR0548|Odontosphindus grandis|COI-5P
----------------------------------------------------AGTTTATTAATTCGAATAGAATTGAGTAATCCTGGTTCTATAATTGGAGATGATCAAATTTACAATGTAATTGTAACTGCACATGCCTTCATTATAATTTTTTTTATAGTTATACCTATTATAATTGGTGGTTTTGGAAACTGATTAGTACCCTTAATACTAGGAGCTCCTGATATAGCATTCCCTCGAATAAATAACATAAGATTTTGACTTTTACCTCCTTCTATTTCTTTATTAATTATAAGAAGAATTGTAGAAAAAGGCGCAGGCACAGGCTGAACTGTTTACCCTCCACTTTCAGCCAATATTGCTCATAATGGAAGATCAGTAGATTTAGCTATTTTTAGATTACATTTAGCAGGTATTTCATCAATTATAGGAGCTATTAATTTTATTTCTACTATTATTAATATACGCCCTATAGGGATAAAATTTGACCAAATACCTCTATTTATTTGAGCAGTCGGAATCACTGCTCTTTTATTATTACTCTCGTTACCTGTATTAGCGGGCGCAATTACTATACTTCTTACAGATCGAAATATTAATACATCATTTTTTGATCCTGCAGGAGGAGGCGATCCAATTCTATACCAACACTTATTT
>PSFOR659-13|BC-PNEF-PSFOR0536|Oedemera barbara|COI-5P
AACTTTATACTTAATCTTCGGAGCATGAGCAGGAATAGTAGGTACGTCTCTTAGACTTCTTATTCGAACTGAACTAGGAAGACCTGGGTCTTTAATTGGAGATGACCAAATTTATAATGTAATTGTAACTGCACACGCCTTTATTATAATTTTCTTTATAGTAATACCAATTGTTATTGGAGGATTCGGAAATTGATTAGTACCACTCATATTAGGAGCACCAGATATAGCTTTTCCTCGTATAAATAATATAAGTTTTTGATTACTCCCCCCATCATTAACTTTATTAATTATAAGAAGAATAGTAGAAAGAGGTGCAGGAACAGGTTGAACAGTTTACCCCCCTCTATCATCTAATATTGCTCATGGAGGCTCATCAGTTGATTTAGCTATTTTTAGTCTTCATTTAGCTGGAATTTCTTCAATTTTAGGTGCCGTAAATTTTATTACAACTGTAATTAATATACGACCATCAGGAATAACCTTAGACCGAATACCTTTATTTGTTTGGGCAGTTGTAATCACAGCAGTTTTACTACTTTTATCTTTACCGGTTTTAGCAGGTGCTATTACTATACTTTTAACAGATCGAAATTTAAATACATCCTTTTTTGACCCAGCAGGAGGAGGAGACCCAATTTTATATCAACACTTATTT
>PSFOR660-13|BC-PNEF-PSFOR0537|Oedemera femoralis|COI-5P
CACTCTTTATCTAATTTTTGGTGCATGGGCAGGAATAGTAGGAACATCTCTTAGACTTTTAATTCGAGCTGAGCTCGGAAACCCAGGATCTTTAATCGGCGATGACCAGATTTACAATGTAATTGTAACTGCTCACGCTTTCATTATAATTTTTTTCATAGTTATACCCATCGTAATTGGGGGATTTGGAAACTGATTAGTGCCACTAATGTTAGGAGCACCTGATATAGCTTTTCCTCGAATAAATAATATAAGATTTTGACTACTCCCCCCGTCATTAACTTTATTAATTATGAGAAGAATAGTGGAAAGAGGTGCAGGTACAGGTTGAACAGTTTATCCTCCCCTATCTTCTAATATTGCACATAGAGGATCTTCTGTAGATTTAGCTATTTTTAGACTACATTTAGCCGGAGTTTCATCAATTTTAGGAGCAGTAAATTTTATTACTACAGTAATTAATATACGACCTTCAGGAATAACATTAGATCGAATACCTCTATTTGTATGAGCTGTTGTTATTACAGCGATTCTTCTTCTCCTATCCCTACCAGTCCTTGCGGGAGCAATTACTATACTCTTAACAGATCGAAATTTAAATACATCCTTTTTTGATCCCGCCGGAGGGGGTGATCCAATTCTATACCAACATTTATTT
>PSFOR663-13|BC-PNEF-PSFOR0540|Oedemera nobilis|COI-5P
CACACTTTATTTAATTTTCGGTGCATGAGCTGGTATAGTAGGAACATCTCTAAGACTTCTTATTCGAGCTGAGCTCGGTAATCCTGGATCATTGATTGGAGACGACCAAATTTATAATGTAATTGTTACAGCTCATGCTTTCATTATAATTTTTTTTATAGTAATACCTATTATAATTGGAGGATTCGGAAATTGACTTGTACCATTAATATTAGGTGCCCCTGATATAGCTTTTCCTCGAATAAATAATATAAGATTTTGACTGCTCCCCCCGTCATTAACTTTATTAATTATAAGAAGAATAGTTGAAAGAGGTGCAGGAACAGGTTGAACTGTTTATCCCCCTTTATCTTCTAATATTGCACATAGAGGATCTTCTGTTGATCTTGCTATTTTTAGACTCCATTTGGCTGGTGTTTCATCAATTCTAGGAGCTGTAAATTTTATCACTACAGTTATTAATATACGACCTGTAGGAATAAATTTAGATCGTATACCACTATTTGTTTGAGCTGTAGTAATTACAGCTATTCTTTTACTTTTATCATTACCAGTCCTTGCTGGTGCAATTACTATACTTTTAACAGATCGAAATCTAAATACATCTTTTTTTGATCCAGCAGGAGGAGGAGATCCAATTCTATATCAACACCTATTT
>PSFOR368-13|BC-PNEF-PSFOR0340|Oedemera podagrariae|COI-5P
CACTCTTTATCTAGTTTTTGGTGCTTGGGCTGGGATAGTAGGAACATCCCTTAGACTCCTAATTCGGGCTGAATTAGGTAACCCAGGATCATTAATTGGTGATGATCAAATTTACAATGTAATTGTAACTGCTCACGCTTTCATTATAATTTTCTTTATAGTTATACCTATTGTAATTGGAGGATTTGGAAACTGATTAGTACCCCTTATATTAGGAGCACCTGATATAGCTTTTCCTCGAATAAATAATATAAGATTTTGACTGCTCCCCCCGTCATTAACTTTATTAATTATAAGAAGAATAGTAGAAAGAGGTGCAGGTACAGGCTGGACAGTTTATCCCCCCTTATCATCTAATATTGCACATAGAGGTTCTTCTGTTGATCTGGCTATTTTTAGACTTCACCTAGCCGGGGTCTCTTCAATTTTAGGAGCAGTTAATTTTATCACTACAGTAATCAATATACGACCTTTAGGAATAACCTTAGACCGTATACCTTTATTTGTTTGAGCTGTTGTTATTACTGCTATTCTTCTACTTCTATCTTTACCGGTACTTGCAGGTGCAATTACTATACTTTTAACAGACCGAAATTTAAATACATCTTTCTTTGATCC----------------------------------------
>PSFOR369-13|BC-PNEF-PSFOR0341|Oedemera podagrariae|COI-5P
CACTCTCTATCTAGTTTTTGGTGCTTGGGCTGGGATAGTAGGAACATCCCTTAGACTCCTAATTCGGGCTGAATTAGGTAATCCAGGATCATTAATTGGTGATGATCAAATTTACAATGTAATTGTAACTGCTCACGCTTTCATTATAATTTTCTTTATAGTTATACCTATTGTAATTGGAGGATTTGGAAACTGATTAGTACCCCTTATATTAGGAGCACCTGATATAGCTTTTCCTCGAATAAATAATATAAGATTTTGACTGCTCCCCCCGTCATTAACTTTATTAATTATAAGAAGAATAGTAGAAAGAGGTGCAGGTACAGGTTGAACAGTTTATCCCCCCTTATCATCTAATATTGCACATAGAGGTTCTTCTGTTGATCTGGCTATTTTTAGACTTCACCTAGCCGGGGTCTCTTCAATTTTAGGAGCAGTTAATTTTATATCTACAGTAATCAATATACGACCTTTAGGAATAACCTTAGACCGTATACCTTTATTTGTTTGAGCTGTTGTTATTACTGCTATTCTTCTACTTCTATCTTTACCGGTACTTGCAGGTGCAATTACTATACTTTTAACAGACCGAAATTTAAATACATCTTTCTTTGATCCTGCAGGAGGTGGAGATCCAATTTTATACCAGCACCTCTTT
>PSFOR678-13|BC-PNEF-PSFOR0555|Oligomerus brunneus|COI-5P
----------------------------------------------------------------------------------------------------------------------------------------------------------------------------------------------------------------------------------------------------------------------------------------------------------------------------------------------------------------------------------------------------------------------------------------------GGAGCTGTCAATTTTATTACAACCGTAATTAATATGCGACCCGAAGGAATATCGTTTGACCGAATACCTCTATTTATTTGATCTGTAGCAATCACTGCCCTACTATTACTACTTTCCCTTCCTGTTTTAGCAGGAGCTATCACTATATTATTAACAGATCGAAACCTTAATACATCATTTTTTGACCCGGCAGGAGGGGGAG--------------------------
>PSFOR218-13|BC-PNEF-PSFOR0190|Omophlus lepturoides|COI-5P
AACACTTTATTTTATCTTTGGAGCTTGATCAGGAATAGTAGGAACATCTTTAAGACTACTTATTCGAGCAGAATTAGGAAACCCCGGATCATTAATTGGGGATGACCAAATCTATAATGTAATCGTTACAGCCCATGCATTTGTCATAATTTTTTTTATAGTTATACCTATTATAATTGGAGGATTTGGTAATTGATTGGTACCACTCATACTAGGAGCCCCAGACATAGCATTCCCTCGAATAAATAACATAAGATTTTGACTATTACCCCCATCATTAACCTTACTTTTAATAAGAAGAATTGTTGAAAATGGGGCAGGAACTGGATGAACTGTGTACCCCCCATTAGCGTCAAACATTGCCCATGGAGGAGCATCTGTTGACTTAGCAATTTTTAGACTTCATCTAGCAGGAATTTCCTCAATTCTCGGAGCTGTTAATTTTATTACAACTGTAATTAACATACGACCACAAGGAATATCATTTGATCGAATACCTTTATTTGTATGAGCTGTCGTAATTACAGCCGTTCTACTATTATTATCACTCCCTGTACTTGCAGGAGCAATTACTATATTACTAACAGACCGTAATATTAATACTTCATTTTTTGATCCTGCAGGAGGAGGTGATCCCATCTTATATCAACACTTATTC
>PSFOR219-13|BC-PNEF-PSFOR0191|Omophlus pubescens|COI-5P
AACACTTTACTTTATCTTCGGAGCCTGGTCAGGAATAGTGGGAACATCCCTAAGACTATTAATTCGAGCAGAATTGGGTAATCCTGGATCCTTAATTGGAGATGACCAAATCTACAATGTAATTATTACAGCCCATGCATTTATTATAATTTTCTTTATAGTTATACCTATTATAATCGGGGGGTTCGGAAACTGATTAGTTCCACTTATACTAGGAGCCCCGGACATAGCATTCCCGCGAATAAATAACATAAGATTTTGATTATTACCTCCTTCTTTAACCTTGCTTTTAATAAGAAGAATTGTCGAAAACGGGGCAGGAACTGGATGAACAGTTTATCCTCCACTAGCTTCTAATATTGCACATGGAGGGGCATCAGTTGACTTAGCAATTTTTAGCCTTCATTTAGCCGGAATTTCATCAATTCTAGGAGCAGTAAACTTTATTACAACAGTAATTAATATACGACCGCAAGGAATATCATTCGATCGGATACCTTTATTCGTATGAGCAGTTGTAATTACAGCCGTTCTTCTATTACTATCACTCCCTGTACTTGCAGGGGCAATTACCATACTATTAACAGACCGTAATATTAACACGTCATTCTTTGACCCTGCGGGAGGAGGAGACCCAATTTTATACCAACACTTATTC
>PSFOR371-13|BC-PNEF-PSFOR0343|Opilo mollis|COI-5P
AACTCTTTATTTTATTTTTGGAGCTTGAGCTGGAATAATTGGAACTTCCTTAAGATTACTAATTCGATCAGAATTAGGAACTCCTGGAACCCTAATTGGAAATGATCAAATTTACAATGTAATTGTTACAGCCCATGCATTTATCATAATTTTTTTTATAGTAATACCTATTATAATTGGAGGATTTGGAAACTGATTAGTTCCTTTAATATTGGGAGCCCCAGATATAGCATTTCCTCGTATAAATAATATAAGATTTTGATTATTACCTCCTTCATTAACTTTGCTTTTAATAAGAAAAATAGTTGAAAGTGGGGTAGGAACAGGTTGAACTGTTTACCCACCATTATCATCTAATATTGCCCATGGAGGGTCTTCTGTTGATTTAGCTATTTTTAGATTACATTTAGCAGGTATTTCATCAATTTTAGGTGCAGTTAATTTTATTACCACTGTAATTAATATACGTCCAGAAGGAATGACTCTGGATCGAACCCCTCTTTTTGTTTGATCTGTAGCTATTACTGCTTTATTATTACTTTTATCATTACCTGTATTAGCAGGAGCTATTACTATACTATTAACTGATCGAAATTTAAATACTTCCTTTTTTGACCCAGCAGGGGGAGGTGATCCAATTCTTTATCAACATTTATTT
>PSFOR1070-14|PASSIFOR-NM13-090|Opilo mollis|COI-5P
AACTCTTTATTTTATTTTTGGAGCTTGAGCTGGAATAATTGGAACTTCCTTAAGATTACTAATTCGATCAGAATTAGGAACTCCTGGAACCCTAATTGGAAATGATCAAATTTACAATGTAATTGTTACAGCCCATGCATTTATCATAATTTTTTTTATAGTAATACCTATTATAATTGGAGGATTTGGAAACTGATTAGTTCCTTTAATATTGGGAGCCCCAGATATAGCATTTCCTCGTATAAATAATATAAGATTTTGATTATTACCTCCTTCATTAACTTTGCTTTTAATAAGAAGAATAGTTGAAAGTGGGGTAGGAACAGGTTGAACTGTTTACCCACCATTATCATCTAATATTGCCCATGGAGGGTCTTCTGTTGATTTAGCTATTTTTAGATTACATTTAGCAGGTATTTCATCAATTTTAGGTGCAGTTAATTTTATTACCACTGTAATTAATATACGTCCAGAAGGAATGACTCTGGATCGAACCCCTCTTTTTGTTTGATCTGTAGCTATTACTGCTTTATTATTACTTTTATCATTACCTGTATTAGCAGGAGCTATTACTATACTATTAACTGATCGAAATTTAAATACTTCCTTTTTTGACCCAGCAGGGGGAGGTGATCCAATTCTTTATCAACATTTATTT
>PSFOR813-13|BC-PNEF-PSFOR0690|Opilo pallidus|COI-5P
TACTCTTTATTTTATTTTTGGAGCTTGAGCTGGAATAATTGGAACTTCTTTAAGATTACTGATTCGATCAGAATTAGGAACCCCTGGGACATTAATTGGAAATGACCAAATTTATAATGTAATTGTTACAGCACATGCATTTATTATAATTTTTTTTATAGTTATACCTATTATAATTGGAGGATTTGGGAATTGATTAGTACCTCTAATATTAGGAGCACCTGATATAGCTTTCCCTCGAATAAATAATATAAGATTTTGATTATTACCTCCTTCATTAACTTTACTTTTAATAAGAAGAATAGTAGAAAGAGGGGTAGGAACTGGTTGAACAGTTTACCCTCCTTTATCTTCTAATATTGCTCATGGAGGATCATCTGTTGATCTAGCTATTTTTAGTTTACATTTAGCTGGAATTTCATCTATTTTAGGAGCTGTAAATTTTATTACTACAGTAATTAATATACGCCCAGAAGGAATAACTCTAGATCGTACTCCTTTATTTGTTTGATCAGTAACTATTACTGCATTATTATTACTTTTATCTTTACCAGTTTTAGCAGGAGCTATTACTATATTATTAACTGATCGAAATTTAAATACATCTTTTTTCGACCCTGCTGGAGGAGGAGACCCAATTCTTTATCAACATTTATTT
>PSFOR626-13|BC-PNEF-PSFOR0503|Opilo pallidus|COI-5P
TACTCTTTATTTTATTTTTGGAGCTTGAGCTGGAATAATTGGAACTTCTTTAAGATTACTGATTCGATCAGAATTAGGAACCCCTGGGACATTAATTGGAAATGACCAAATTTATAATGTAATTGTTACAGCACATGCATTTATTATAATTTTTTTTATAGTTATACCTATTATAATTGGAGGATTTGGGAATTGATTAGTACCTCTAATATTAGGAGCACCTGATATAGCTTTCCCTCGAATAAATAATATAAGATTTTGATTATTACCTCCTTCATTAACTTTACTTTTAATAAGAAGAATAGTAGAAAGAGGGGTAGGAACTGGTTGAACAGTTTACCCTCCTTTATCTTCTAATATTGCTCATGGAGGATCATCTGTTGATCTAGCTATTTTTAGTTTACATTTAGCTGGAATTTCATCTATTTTAGGAGCTGTAAATTTTATTACTACAGTAATTAATATACGCCCAGAAGGAATAACTCTAGATCGTACTCCTTTATTTGTTTGATCAGTAGCTATTACTGCATTATTATTACTTTTATCTTTACCAGTTTTAGCAGGAGCTATTACTATATTATTAACTGATCGAAATTTAAATACATCTTTTTTCGACCCTGCTGGAGGAGGAGACCCAATTCTTTATCAACATTTATTT
>PSFOR070-13|BC-PNEF-PSFOR0042|Oplosia cinerea|COI-5P
AACTTTATATTTTATTTTTGGCGCATGGGCTGGTATAGTTGGAACTTCTTTAAGAATTTTAATTCGTTCAGAATTAGGAAATTCCGGGTCTTTAATTGGTGATGATCAAATTTATAACACTATTGTAACTGCTCATGCTTTTATTATAATTTTTTTTATAGTTATACCTGTTATAATAGGAGGATTTGGAAATTGGTTAGTTCCTTTAATATTAGGAGCTCCTGATATAGCCTTCCCTCGAATAAATAATATAAGATTTTGACTTCTTCCTCCATCATTAACCCTTCTTATTATAAGAAGAATTATTGATAATGGGGCAGGAACAGGATGAACTGTTTATCCACCTTTATCAGCTAACATTGCCCATGCAGGCTCATCAGTAGATTTAGCTATTTTTAGTCTTCATTTAGCTGGGGTATCCTCAATTTTAGGTGCAGTAAATTTTATTACTACAGTTATTAATATGCGCCCTAAAGGAATAACCTTTGATCGATTACCCTTATTTGTCTGAGCAGTAAAAATTACTGCCATTTTACTTCTTCTTTCCCTTCCTATTCTTGCAGGTGCAATTACAATGCTTTTAACAGATCGAAATTTAAATACTTCATTTTTTGACCCCGCGGGCGGAGGTGATCCAATTTTATACCAACATTTATTT
>PSFOR272-13|BC-PNEF-PSFOR0244|Orchesia minor|COI-5P
TACTTTATATTTTATTTTCGGAGCATGATCAGGAATAGTTGGAACCTCATTAAGATTATTAATTCGATCAGAATTAGGAAATCCAGGTTCATTAATTGGAAATGATCAAATTTATAATGTTATTGTTACTGCCCATGCATTTATTATAATTTTTTTTATAGTTATACCCATCATAATAGGAGGATTTGGTAATTGATTAGTGCCTCTTATACTTGGAGCCCCTGATATAGCTTTTCCACGAATAAATAATATAAGATTTTGGTTATTGCCCCCTTCATTAACCTTACTAATTATAAGAAGAATCGTAGAAAACGGAGCAGGAACAGGATGAACAGTTTATCCCCCACTGTCATCTAATATTGCTCATAATGGCTCATCAGTTGATTTAGCTATTTTTAGTTTACATTTAGCCGGAATTTCCTCAATTCTTGGATCTGTAAATTTTCTTACTACCATTGTAAATATACGCCCAATCGGTATAACATTTGATCGAATACCACTATTTGTATGATCAGTTGGAATTACTGCAGTATTATTACTTCTTTCTTTACCAGTATTAGCTGGAGCTATTACTATACTATTAACAGATCGAAATTTAAATACTTCTTTTTTTGACCCGGCAGGAGGAGGAGATCCTATTTTATATCAGCATTTATTT
>PSFOR273-13|BC-PNEF-PSFOR0245|Orchesia undulata|COI-5P
AACTTTATATTTTATTTGTGGTGCATGATCTGGAATAGTAGGGACTTCTTTAAGTTTATTAATCCGAACAGAATTAGGTAATCCTGGCTCATTAATTGGTAATGATCAAATCTATAATGTTATTGTTACTGCCCATGCTTTTATCATAATTTTTTTTATAGTTATACCTATTATAATAGGTGGATTCGGAAATTGATTAGTCCCATTAATATTAGGAGCCCCAGATATAGCTTTTCCACGAATAAATAATATAAGATTTTGGTTATTGCCCCCCTCTCTAACCTTATTAATTATAAGAAGAATCGTAGAAAATGGAGCAGGAACAGGATGAACTGTATACCCTCCACTATCCTCTAATATTGCCCATAATGGATCTTCTGTAGATTTAGCTATTTTTAGACTTCATTTAGCTGGAATTTCCTCTATTCTAGGATCTGTTAATTTCCTTACTACTATCATCAATATACGTCCTTTAGGAATATCATTTGATCGTATACCTTTATTTGTTTGAGCAGTAGGAATTACAGCTGTTTTATTATTATTATCCCTACCAGTATTAGCAGGAGCAATTACTATACTTTTAAC-------------------------------------------------------------------------
>PSFOR472-13|BC-PASSIFOR0045|Orchesia undulata|COI-5P
-----------------------------------------------------------------------------------------------------------------------------------------------------------------------------------------------------------------------------------------------------------TAAGATTTTGGTTATTGCCCCCCTCTCTAACCTTATTAATTATAAGAAGAATCGTAGAAAATGGAGCAGGAACAGGATGAACTGTATACCCTCCACTATCCTCTAATATTGCCCATAATGGATCTTCTGTAGATTTAGCTATTTTTAGACTTCATTTAGCTGGAATTTCCTCTATTCTAGGATCTGTTAATTTCCTTACTACTATCATCAATATACGTCCTTTAGGAATATCATTTGATCGTATACCTTTATTTGTTTGAGCAGTAGGAATTACAGCTGTTTTATTATTATTATCCCTACCAGTATTAGCAGGAGCAATTACTATACTTTTAACTGATCGTAATTTAAATACTTCATTTTTTGATCCTGCAGGAGGTGGAGACCCTATTTTATACCAACATTTATTT
>PSFOR274-13|BC-PNEF-PSFOR0246|Osphya aeneipennis|COI-5P
AACTCTTTACTTCATTTTTGGTGCCTGATCAGGAATAGTAGGCACTTCTTTAAGACTTTTAATTCGTTCTGAATTAGGAAACCCTGGATCTTTAATTGGTGATGATCAAATTTATAATGTTATTGTCACAGCTCATGCTTTTATCATAATTTTTTTTATAGTTATACCAATTCTTATTGGTGGATTTGGAAATTGATTAGTTCCTTTAATACTAGGAGCTCCTGATATGGCTTTTCCCCGAATAAATAATATAAGATTTTGGCTCCTACCCCCTTCCTTGACCCTTTTAATTATAAGAAGAGTTGTAGAAAATGGGGCAGGAACTGGATGAACTGTTTATCCTCCTTTAGCTTCAAATATTGCTCATAGAGGTGCTTCTGTTGATTTAGCAATTTTTAGACTCCATTTGGCAGGAGTGTCTTCTATTTTAGGAGCTGTAAATTTTATTACTACTGTAATTAATATGCGACCTCCTGGAATATCTTTTGATCAAATGCCTTTATTTGTATGAGCTGTTGTAATTACAGCTATTTTATTACTTTTATCTCTCCCAGTTTTAGCTGGAGCAATTACTATACTTTTAACCGATCGTAATTTAAATACTTCATTTTTTGACCCTGCTGGAGGGGGAGACCCTATTCTTTATCAACATTTATTC
>PSFOR555-13|BC-PNEF-PSFOR0432|Peltis grossa|COI-5P
AACTCTTTATTTCATCTTTGGTTCATGAGCTGGAATAGTAGGGACCTCTCTCAGACTTTTAATTCGATCAGAATTAGGAAACCCGGGTTCTTTAATTGGGAATGATCAAATTTATAATGTTATTGTTACTGCTCATGCTTTTGTAATAATTTTTTTCATAGTTATACCAATTCTAATTGGAGGATTTGGGAATTGATTAGTACCCCTAATACTAGGAGCCCCAGATATAGCTTTCCCTCGAATAAATAATATAAGATTTTGACTCCTCCCTCCATCTTTAACTCTTCTTTTATTAAGAAGATTCGTAGAAAATGGAGCTGGAACTGGATGAACAGTTTACCCCCCTTTATCAGCCAATATTTCTCATAGAGGTTCATCCGTAGATTTAGCTATTTTTAGACTTCATTTAGCTGGTATTTCTTCAATTTTAGGAGCTGTAAATTTTATCACGACAGTTATTAATATACGTCCAATTGGAATAACCCTAGACCGTACTCCTTTATTTGTTTGATCAGTTATAATTACAGCTATTCTTTTATTACTTTCTTTACCAGTACTAGCAGGAGCAATTACTATATTATTAACAGACCGAAATATTAATACTTCCTTCTTTGACCCTGCTGGAGGAGGAGACCCTATTCTTTACCAACATTTATTT
>PSFOR071-13|BC-PNEF-PSFOR0043|Oxymirus cursor|COI-5P
AACTTTATATTTTGTTTTCGGAGCATGAGCAGGTATAGTAGGAACATCTTTAAGAATATTAATTCGATCAGAATTAGGAAACCCTGGATCTTTAATCGGAGATGACCAAATTTATAATGTTATTGTTACAGCACATGCATTTGTCATAATTTTTTTTATGGTTATACCAATTTTAATTGGAGGATTTGGAAATTGATTAGTTCCTTTAATACTAGGTGCTCCTGACATAGCTTTTCCTCGAATAAATAATATAAGATTTTGACTTTTACCCCCTTCATTAACACTTTTAATTATAAGAAGAATTGTGGAAAATGGGGCAGGAACTGGATGAACAGTTTATCCACCACTCTCATCTAATATTGCTCACAGAGGTTCTTCTGTTGATTTAGCAATTTTCAGATTACATTTGGCGGGAATCTCCTCAATTTTAGGAGCAGTAAATTTTATTTCAACTGTTATTAATATACGATCTCCAAATATAACTTTCGATCAAATACCCTTATTTGTATGAGCAGTTGTAATTACTGCCATTCTTCTTCTTTTATCTTTACCTGTATTAGCGGGAGCTATCACAATATTATTAACAGATCGAAATCTTAATACTTCTTTTTTTGACCCTGCCGGAGGGGGAGATCCAATTTTATACCAACATTTATTT
>PSFOR072-13|BC-PNEF-PSFOR0044|Oxypleurus nodieri|COI-5P
GACTCTTTACTTTATTCTCGGAGCATGAGCAGCGATATTAGGAACATCTCTAAGAATATTAATTCGATCAGAGCTGGGAAATCCTGGATCTTTAATTGGTGACGATCAAATTTATAATGTTATTGTTACAGCCCATGCTTTTGTAATAATTTTTTTTATAGTTATACCTATTATAATTGGTGGATTTGGAAATTGATTAGTACCATTAATATTAGGGGCCCCAGATATAGCTTTTCCTCGTATAAATAATATAAGATTTTGACTTTTACCCCCTTCTTTAACTCTTTTAATTATAAGAAGAATTGTAGAAAGTGGTGCTGGTACAGGTTGAACTGTTTACCCACCTTTATCTGCAAATATTGCTCATAGAGGAGCATCTGTTGATTTGGCTATTTTTAGACTTCATCTAGCCGGTATTTCATCAATTTTAGGGGCTGTTAATTTTATTACAACAGCAATTAATATACGACCTAAAGGAATAAATTTAGACCGACTTCCTCTTTTTGTTTGAGCAGTAATTATTACAACTATTTTACTTCTTTTATCTTTACCTGTATTAGCTGGAGCAATTACAATACTACTAACAGATCGAAATCTAAATACATCTTTTTTCGACCCTGCGGGAGGAGGAGATCCTATTTTATATCAACATTTATTT
>PSFOR241-13|BC-PNEF-PSFOR0213|Oxythyrea funesta|COI-5P
AACTCTTTACTTTTTATTCGGAAGATGAGCCGGAATAGTAGGAACATCCCTAAGATTACTAATTCGAGCTGAACTTGGAAATCCTGGATCTTTGATTGGCGATGACCAAATTTATAATGTGATTGTCACAGCCCATGCCTTCATTATAATTTTCTTCATAGTTATACCAATTATGATTGGTGGTTTCGGAAATTGACTAGTCCCTCTAATACTAGGGGCCCCCGATATAGCATTTCCCCGAATAAACAACATAAGATTTTGGTTACTTCCACCTTCACTAACATTACTTTTAATAAGAAGAATAGTTGAAAGAGGGGCAGGAACTGGTTGAACTGTCTACCCTCCCCTTTCTAGAAACATTGCTCATAGAGGTGCTTCAGTAGATTTAGCTATTTTTAGTCTTCATTTAGCAGGAATTTCCTCAATTTTAGGTGCTGTTAATTTTATTACTACAGTTATCAATATACGATCAACAGGAATAACATTTGACCGAATACCTTTATTTGTTTGATCAGTTGCTTTAACTGCTTTACTATTACTACTATCACTCCCAGTATTAGCAGGAGCAATTACAATACTTTTAACAGACCGAAATATTAATACCTCATTTTTTGACCCGGCAGGTGGAGGAGACCCGATTTTATACCAGCATTTATTT
>PSFOR913-14|BC-PASSIFOR0132|Pachytodes cerambyciformis|COI-5P
AACTTTATATTTTATTTTCGGTGCTTGAGCTAGAATAGTCGGAACATCACTAAGATTATTAATTCGATCAGAATTAGGAAGCCCCGGTTCTTTAATTGGTAACGATCAAATTTACAATGTAATTGTCACAGCTCACGCTTTTGTAATAATTTTTTTTATAGTTATACCCATCATAATTGGTGGATTCGGAAATTGATTAGTACCTTTAATACTTGGCGCTCCTGATATAGCATTCCCCCGAATGAACAATATAAGATTCTGATTTCTACCCCCCTCTTTAACCCTGTTAATTTTAAGAAGTATAGTAGAAACCGGCGCCGGCACAGGATGAACAGTTTACCCTCCTCTATCTGCAAATATCGCCCACAGAGGTTCATCTGTAGATTTGGCAATTTTCAGTCTTCATTTAGCTGGAATTTCATCTATTCTAGGAGCAGTCAATTTTATTACTACTGTTATTAATATGCGGCCGGAAGGAATAAGACCAGATAAAATACCCCTTTTTGTTTGAGCTGTAGTTATTACTGCAATTTTATTACTTTTATCCCTCCCAGTTTTAGCTGGAGCAATTACAATACTCTTAACCGATCGAAATCTAAATACTTCTTTTTTTGACCCCGCANGAGGAGGAGACCCTATTTTATACCAACACTTATTT
>PSFOR220-13|BC-PNEF-PSFOR0192|Palorus depressus|COI-5P
AACACTTTATTTCATTTTTGGAGCCTGAGCAGGAATAGTAGGTACTTCACTTAGACTACTAATTCGAACAGAATTAGGAAACCCCGGGTCCTTAATTGGAAACGACCAAATTTATAATGTAATTGTAACTGCACATGCTTTCATTATAATCTTCTTCATAGTAATACCAATTATAATCGGAGGATTTGGAAATTGATTAGTACCTTTAATATTAGGTGCACCAGATATGGCTTTCCCTCGAATAAACAACATAAGATTTTGACTCCTTCCCCCTTCATTAACTCTTCTTTTAATAAGAAGAATTGTAGAAAGAGGAGCCGGAACAGGGTGAACTGTTTATCCCCCCCTTTCATCAAACATTGCACATAGAGGATCATCAGTAGATTTAGCAATTTTCAGCTTACATTTAGCAGGAATTTCGTCAATTCTTGGTGCAGTAAATTTTATTACCACTGTGATTAATATACGACCACAAGGAATAACATTTGATCGAATACCTTTATTTGTATGATCAGTAGTAATTACTGCTGTTCTTCTTCTATTATCATTACCTGTTTTAGCAGGAGCTATTACAATATTACTTACTGATCGTAATATTAATACGTCATTCTTTGACCCTGCAGGAGGAGGAGACCCTATTTTATACCAGCATTTATTT
>PSFOR389-13|BC-PNEF-PSFOR0361|Palorus depressus|COI-5P
AACACTTTATTTCATTTTTGGAGCCTGAGCAGGAATAGTAGGTACTTCACTTAGACTACTAATTCGAACAGAATTAGGAAACCCCGGGTCCTTAATTGGAAACGACCAAATTTATAATGTAATTGTAACTGCACATGCTTTCATTATAATCTTCTTCATAGTAATACCAATTATAATCGGAGGATTTGGAAATTGATTAGTACCTTTAATATTAGGTGCACCAGATATGGCTTTCCCTCGAATAAACAACATAAGATTTTGACTCCTTCCCCCTTCATTAACTCTTCTTTTAATAAGAAGAATTGTAGAAAGAGGAGCCGGAACAGGGTGAACTGTTTATCCCCCCCTTTCATCAAACATTGCACATAGAGGATCATCAGTAGATTTAGCAATTTTCAGCTTACATTTAGCAGGAATTTCGTCAATTCTTGGTGCAGTAAATTTTATTACCACTGTGATTAATATACGACCACAAGGAATAACATTTGATCGAATACCTTTATTTGTATGATCAGTAGTAATTACTGCTGTTCTTCTTCTATTATCATTACCTGTTTTAGCAGGAGCTATTACAATATTACTTACTGATCGTAATATTAATACGTCATTCTTTGACCCTGCAGGAGGAGGAGACCCTATTTTATACCAGCATTTATTT
>PSFOR136-13|BC-PNEF-PSFOR0108|Paracorymbia fulva|COI-5P
AACTTTATATTTTATTTTTGGTGCTTGAGCAGGAATAGTTGGAACATCACTTAGACTTTTAATTCGTTCAGAATTAGGAAATCCTGGGTCTTTAATTGGTGATGACCAAATTTATAATGTTATTGTAACAGCGCATGCATTTGTAATAATTTTTTTTATAGTTATACCTATCATAATTGGAGGATTCGGAAATTGATTAGTTCCTTTAATATTAGGAGCCCCAGATATAGCATTCCCTCGAATAAATAATATAAGATTTTGATTATTACCACCTTCATTAACTTTATTAATTATAAGAAGAGTAGTAGAAAATGGAGCTGGAACAGGATGAACAGTTTATCCACCTCTTTCATCTAATATTGCTCATAGAGGATCATCAGTTGATTTAGCTATTTTTAGTCTTCATTTAGCGGGTATTTCCTCTATTCTTGGTGCAGTAAATTTTATCACAACAGTTATTAATATACGACCTGTAGGTATAACTCCTGAACGTATACCTCTTTTCGTTTGAGCTGTTGTAATTACTGCTGTTCTTCTTCTTTTATCTCTTCCAGTTCTAGCAGGAGCAATTACAATATTATTAACAGATCGAAATATTAATACTTCTTTTTTTGACCCTGCTGGAGGAGGTGATCCTATTCTTTATCAACATTTATTT
>PSFOR137-13|BC-PNEF-PSFOR0109|Paracorymbia hybrida|COI-5P
AACTTTATATTTTATTTTTGGTGCTTGGGCAGGGATAATTGGAACATCTCTTAGACTTTTAATTCGTTCAGAATTAGGTAACCCTGGTTCTTTAATTGGTGATGATCAAATCTATAATGTTATTGTAACAGCACATGCATTTGTGATAATTTTTTTTATAGTTATACCTGTAATAATTGGTGGTTTCGGAAATTGATTAGTCCCATTAATACTTGGTGCTCCAGATATAGCATTTCCACGAATAAATAATATAAGATTCTGGTTACTCCCACCTTCATTAACTTTATTAATTATAAGAAGTGTAGTTGAAAGTGGGGCTGGAACAGGATGAACAGTTTACCCTCCTCTTTCATCTAACATCGCACATAGGGGATCATCAGTTGATTTAGCTATTTTTAGTCTTCATTTAGCAGGTATTTCTTCAATTTTAGGTGCAGTAAATTTTATTACAACAGTTATTAATATACGACCTGTGGGAATAACACCTGAACGAATACCTCTTTTTGTTTGGGCTGTAGTTATTACTGCTATTCTTTTACTTTTATCTTTACCTGTATTAGCTGGTGCAATTACTATACTTTTAACTGATCGTAATATTAATACCTCTTTTTTTGACCCTGCTGGAGGCGGAGACCCAATTCTTTACCAACATTTATTT
>PSFOR138-13|BC-PNEF-PSFOR0110|Paracorymbia maculicornis|COI-5P
AACTTTATATTTTATTTTTGGTGCTTGAGCAGGGATAATTGGAACATCTCTTAGACTTTTAATTCGTTCAGAATTAGGTAACCCTGGTTCTTTAATTGGTGATGATCAAATCTATAATGTTATTGTAACAGCACATGCATTTGTGATAATTTTTTTTATAGTTATACCTGTAATAATTGGTGGTTTCGGAAATTGATTAGTCCCATTAATACTTGGTGCCCCAGATATAGCATTTCCACGAATAAATAATATAAGATTCTGATTACTCCCACCTTCATTAACTTTATTAATTATAAGAAGTGTAGTTGAAAGTGGGGCTGGAACAGGATGAACAGTTTACCCTCCTCTTTCATCTAACATCGCACATAGGGGATCATCAGTTGATTTAGCTATTTTTAGTCTTCATTTAGCAGGTATTTCTTCAATTTTAGGTGCAGTAAATTTTATTACAACAGTTATTAATATACGACCTGTGGGAGTAACACCCGAACGAATACCTCTTTTTGTTTGAGCTGTAGTTATTACTGCTATTCTTTTACTTTTATCTTTACCTGTATTAGCTGGTGCAATTACTATACTTTTAACTGATCGTAATATTAATACCTCTTTTTTTGACCCTGCTGGAGGCGGAGACCCAATTCTTTACCAACATTTATTT
>PSFOR139-13|BC-PNEF-PSFOR0111|Paracorymbia stragulata|COI-5P
AACTTTATACTTTATCTTTGGAGCTTGGGCTAGTATAGTTGGCACTTCTCTAAGTCTCCTAATTCGTTCAGAATTAGGAAATCCTGGATCTTTAATTGGTGATGATCAAATTTATAATGTTATTGTTACAGCTCATGCATTTGTAATAATTTTTTTTATAGTTATACCAATCATAATCGGAGGATTTGGCAACTGATTAGTTCCATTAATATTAGGGGCCCCAGATATAGCATTTCCTCGAATAAACAATATAAGATTTTGATTATTACCGCCTTCACTTACTTTATTAATTATAAGTAGAATTGTTGAAAACGGTGCTGGAACGGGATGAACTGTTTACCCCCCCTTATCAGCTAATATTGCTCATACAGGTTCATCAGTAGATCTAGCTATTTTTAGTCTTCATTTAGCTGGAATTTCATCAATTTTAGGTGCTGTAAATTTTATTACTACTGTAATTAATATACGACCTGTTGGAATAAACCCAGAACGAATACCTCTTTTTGTTTGAGCAGTAATAATTACTGCAATTTTACTTCTTTTATCCTTACCAGTTTTAGCTGGTGCAATTACTATACTTTTAACAGATCGAAATTTAAATACTTCTTTTTTTGATCCAATTGGCGGAGGAGACCCTATTCTTTATCAACATTTATTT
>PSFOR140-13|BC-PNEF-PSFOR0112|Paracorymbia stragulata|COI-5P
AACTTTATACTTTATCTTTGGAGCTTGGGCTAGTATAGTTGGCACTTCTCTAAGTCTCCTAATTCGTTCAGAATTAGGAAATCCTGGATCTTTAATTGGTGATGATCAAATTTATAATGTTATTGTTACAGCTCATGCATTTGTAATAATTTTTTTTATAGTTATACCAATCATAATCGGAGGATTTGGCAACTGATTAGTTCCATTAATATTAGGGGCCCCAGATATAGCATTTCCTCGAATAAACAATATAAGATTTTGATTATTACCGCCTTCACTTACTTTATTAATTATAAGTAGAATTGTTGAAAACGGTGCTGGAACGGGATGAACTGTTTACCCCCCCTTATCAGCTAATATTGCTCATACAGGTTCATCAGTAGATCTAGCTATTTTTAGTCTTCATTTAGCTGGAATTTCATCAATTTTAGGTGCTGTAAATTTTATTACTACTGTAATTAATATACGACCTGTTGGAATAAACCCAGAACGAATACCTCTTTTTGTTTGAGCAGTAATAATTACTGCAATTTTACTTCTTTTATCCTTACCAGTTTTAGCTGGTGCAATTACTATACTTTTAACAGATCGAAATTTAAATACTTCTTTTTTTGATCCAATTGGCGGAGGAGACCCTATTCTTTATCAACATTTATTT
>PSFOR141-13|BC-PNEF-PSFOR0113|Parmena balteus|COI-5P
TACTTTATACTTTGTTTTTGGTGCTTGAGCAAGAATAGTAGGAACTTCCCTAAGAATACTAATTCGCTCTGAACTAGGAAACCCCGGCTCTTTAATTGGTGATGATCAAATTTATAATGTAATTGTTACAGCTCATGCTTTTATTATAATTTTTTTTATAGTTATACCAATTATAATTGGCGGTTTTGGTAATTGATTGGTACCCTTAATACTAGGGGCCCCTGATATAGCATTTCCTCGAATAAATAATATAAGATTTTGATTGCTACCTCCTTCAATCACCCTCTTAATTATAAGAAGAATTGTAGAAAATGGGGCTGGAACTGGGTGAACAGTTTACCCGCCCCTTTCAGGAAATATTGCTCATAATGGTGCTTCTGTAGATTTAGCTATTTTTAGACTTCATCTAGCTGGAATTTCCTCAATTCTTGGTGCCGTAAATTTTATTACTACAGTAATTAATATACGCCCCAAAGGATTAAATTTTGATCGATTACCTTTATTTGTTTGAGCAGTTAAAATCACGGCTATTCTCCTACTTCTTTCCCTACCAGTTCTTGCTGGAGCTATTACTATGCTATTAACTGATCGAAATTTAAATACTACATTTTTTGATCCGGCTGGGGGAGGAGATCCCATTCTTTATCAACATTTATTT
>PSFOR142-13|BC-PNEF-PSFOR0114|Parmena meregallii|COI-5P
TACTTTATATTTTGTTTTCGGTGCTTGAGCAAGAATAGTAGGAACCTCCCTTAGAATACTAATTCGATCTGAACTAGGAAACCCCGGCTCTTTAATTGGTGATGATCAAATTTATAATGTGATTGTAACAGCTCATGCCTTTATTATAATTTTTTTTATAGTAATACCAATTATAATTGGTGGTTTTGGTAATTGATTAGTACCTTTAATACTAGGCGCCCCTGATATAGCATTTCCTCGAATAAATAATATAAGATTTTGATTGCTTCCTCCCTCAATCACTTTCTTAATTATAAGAAGAATTGTTGAAAATGGTGCCGGAACTGGGTGAACGGTTTATCCCCCACTCTCTGGAAATATCGCTCATAATGGAGCTTCTGTAGATCTAGCAATTTTTAGCCTTCATCTAGCAGGTATTTCATCAATTTTAGGGGCTGTAAATTTTATTACAACAGTAATTAACATACGACCAGAAGGTTTAAAATTTGATCGATTACCTCTTTTTGTTTGAGCTGTTAAAATTACAGCTATCCTTTTACTCCTCTCTTTACCTGTTCTTGCAGGTGCTATTACTATACTATTAACGGATCGAAATCTAAATACTACATTTTTTGATCCTGCTGGAGGAGGTGACCCCATTCTTTATCAACATTTATTT
>PSFOR143-13|BC-PNEF-PSFOR0115|Pedostrangalia pubescens|COI-5P
AACTTTATATTTTATTTTTGGTGCTTGAGCAGGTATAGTTGGAACATCCTTAAGAATGCTAATTCGTTCAGAATTAGGAAACCCGGGATCTTTAATTGGTAACGATCAAATTTATAATGTTATTGTTACTGCACATGCATTTATTATAATTTTTTTTATAGTTATACCAATTATAATTGGAGGATTTGGAAATTGATTAGTTCCACTTATACTAGGAGCTCCAGATATAGCATTCCCTCGAATAAATAATATAAGATTTTGATTATTACCGCCTTCTTTAACTCTTCTTATTATAAGAAGGGTAGTTGAAAGAGGAGCAGGAACAGGATGAACAGTTTACCCCCCCCTATCTTCTAATATTGCTCATAGAGGATCTTCTGTTGATTTAGCTATTTTTAGACTACACTTAGCCGGAATTTCTTCTATCCTTGGAGCAGTTAATTTTATTACAACAGTAATTAATATACGACCTGTAGGTATAAGCCCCGATCGAATACCTTTATTTGTTTGAGCAGTTGTAATTACAGCCATTCTTTTACTTTTATCTCTTCCAGTTTTAGCTGGTGCTATTACTATATTATTGACAGATCGAAATTTAAATACTTCTTTTTTTGATCCAGCAGGAGGTGGGGATCCAATTTTATACCAACATTTAT--
>PSFOR144-13|BC-PNEF-PSFOR0116|Pedostrangalia revestita|COI-5P
AACTTTATATTTTATTTTTGGAACTTGAGCTGGAATAGTAGGAACATCTTTAAGAGTATTAATCCGTTCCGAATTAGGTAACCCAGGTTCATTAATTGGAAACGACCAAATTTATAATGTTATTGTCACAGCCCATGCATTTATTATAATTTTTTTTATAGTTATACCTATTATAATCGGAGGTTTTGGTAACTGATTAGTTCCTTTAATATTGGGAGCTCCAGATATAGCATTTCCTCGAATAAATAATATAAGATTTTGATTATTGCCACCTTCATTAACACTTCTTATTATAAGAAGAATTGTAGAAAGAGGGGCCGGAACAGGATGAACTGTTTACCCTCCTCTTTCTTCCAATATTGCTCATAGAGGATCTTCTGTTGATTTAGCAATTTTCAGATTACATTTAGCTGGGATTTCATCAATTTTGGGAGCAGTAAATTTTATCACAACTGTAATTAATATGCGATCTTCAGGGATAACTCCTGATCGCTTACCTTTATTTGTTTGAGCTGTAACAATTACAGCTATTTTACTTCTTTTATCTTTACCAGTTCTAGCCGGAGCAATCACTATGTTATTAACAGATCGAAATTTAAATACATCTTTTTTTGACCCGGCTGGAGGGGGAGACCCAATTTTATACCAACACTTATTT
>PSFOR028-13|BC-PASSIFOR0028|Pedostrangalia revestita|COI-5P
AACTTTATATTTTATTTTTGGAACTTGAGCTGGAATAGTAGGAACATCTTTAAGAGTATTAATCCGTTCCGAATTAGGTAACCCAGGTTCATTAATTGGAAACGACCAAATTTATAATGTTATTGTCACAGCCCATGCATTTATTATAATTTTTTTTATAGTTATACCTATTATAATCGGAGGTTTTGGTAACTGATTAGTTCCTTTAATATTGGGAGCTCCAGATATAGCATTTCCTCGAATAAATAATATAAGATTTTGATTATTGCCACCTTCATTAACACTTCTTATTATAAGAAGAATTGTAGAAAGAGGGGCCGGAACAGGATGAACTGTTTACCCTCCTCTTTCTTCCAATATTGCTCATAGAGGATCTTCTGTTGATTTAGCAATTTTCAGATTACATTTAGCTGGGATTTCATCAATTTTGGGAGCAGTAAATTTTATCACAACTGTAATTAATATGCGATCTTCAGGGATAACCCCTGATCGCTTACCTTTATTTGTTTGAGCTGTAACAATTACAGCTATTTTACTTCTTTTATCTTTACCAGTTCTAGCCGGAGCAATCACTATGTTATTAACAGATCGAAATTTAAATACATCTTTTTTTGACCCGGCTGGAGGAGGAGACCCAATTTTATACCAACACTTATTT
>PSFOR553-13|BC-PNEF-PSFOR0430|Peltis ferruginea|COI-5P
AACCTTATACTTCATTTTTGGGTCATGAGCAGGGATAGTAGGTACTTCCTTAAGTTTATTAATCCGATCTGAATTAGGAAACCCAGGATCATTAATTGGGAATGACCAAATTTATAATGTTATTGTAACAGCCCACGCTTTCGTAATAATTTTTTTTATAGTTATACCTATTTTAATTGGAGGTTTTGGAAATTGATTAGTTCCTCTAATACTAGGTGCTCCAGATATAGCATTCCCTCGTATAAACAACATAAGATTCTGATTATTACCTCCTTCATTATCTTTACTAATTCTCAGAAGTTTAATTGAAAATGGAGCTGGTACTGGGTGAACTGTCTATCCCCCTCTCTCATCAAATATTGCCCATAGAGGTTCTTCTGTTGATTTGGCAATTTTTAGATTACATTTAGCAGGAATTTCATCCATTCTAGGAGCAGTAAATTTTATTACTACAGTTATTAATATACGACCTATAGGAATAACTTTAGACCGCATCCCTCTATTTGTTTGATCAGTAGTAATTACAGCTCTTTTGCTTTTATTGTCTCTC------------------------------------------------------------------------------------------------------------
>PSFOR221-13|BC-PNEF-PSFOR0193|Pentaphyllus testaceus|COI-5P
TTCCCTTTACTTCATTTTTGGATCTTGATCAGGAATAATTGGAACATCCCTAAGACTCTTAATTCGAACAGAATTGGGAAACCCCGGATCTCTCATCGGGGATGACCAAATCTACAATGTAATCGTGACCGCCCACGCTTTCATTATAATTTTCTTTATAGTAATACCAATTGTAATTGGAGGCTTTGGAAACTGGCTTGTACCCCTCATGCTAGGAGCTCCCGATATAGCCTTTCCCCGAATAAATAACATAAGGTTCTGATTACTGCCCCCTTCTTTAACTCTTTTGTTAATGAGAAGAATTGTAGAAAGAGGGGCAGGAACCGGATGAACAGTTTACCCACCACTTTCATCCAACATTGCCCATGGAGGCTCCTCTGTAGACTTAGCTATCTTTAGACTCCATTTAGCTGGAATCTCCTCAATCCTCGGTGCAGTAAACTTTATTACTACTGTAATTAATATACGACCTCAAGGAATAACCTTTGACCGCCTTCCCCTTTTTGTGTGAGCTGTGGTAATTACAGCAATACTTTTATTGCTATCCCTTCCAGTTCTTGCTGGAGCAATTACAATACTCCTTACTGATCGGAATATTAATACATCCTTTTTTGACCCTGCGGGAGGAGGAGACCCTATTCTCTATCAACACTTATTT
>PSFOR589-13|BC-PNEF-PSFOR0466|Phaenops formaneki|COI-5P
-----------------------------------TAGTGGGAACAGCTCTAAGACTACTAATTCGAGCTGAACTTGGTAACCCTGGAGCTTTAATTGGAGATGATCAAATCTATAACACAATTGTAACTGCTCATGCATTTATCATAATTTTCTTTATAGTTATACCTATTATAATAGGGGGATTTGGAAACTGATTAGTACCCTTAATACTTGGAGCTCCTGATATAGCATTTCCTCGAATAAATAATATAAGATTTTGATTACTACCTCCCTCTTTAACTCTCCTTCTAATAAGAAGAATTGTAGAAAATGGTGCTGGGACAGGTTGAACTGTTTATCCACCTTTAGCCGCTAATACCGCTCATAGAGGAGCTTCAGTTGATTTAGCCATTTTTAGTCTTCATTTAGCAGGAATTTCTTCTATTTTAGGAGCTGTAAATTTCATTACAACCGTAATTAATATACGATCAGTAGGTATAACATTTGATCAAATACCTTTATTTGTATGATCTGTGGCTATTACAGCTCTTTTATTACTTCTTTCTCTACCTGTTTTAGCAGGAGCTATTACTATACTTTTAACAGATCGAAACTTAAATACTTCTTTTTTTGACCCAGCAGGAGGAGGGGATCCTATTCTTTATCAACATTTATTT
>PSFOR709-13|BC-PNEF-PSFOR0586|Phloeotribus scarabaeoides|COI-5P
AACACTTTACTTTATTTTTGGGGCATGGGCTGGTATAGTAGGAACATCATTAAGAATATTAATTCGAACTGAATTAGGAACCAGAAATAATCTAATTGGAGATGACCAAATCTATAATTCTATTGTTACCGCTCACGCTTTTATCATAATTTTTTTTATAGTTATACCCATTATAATTGGAGGATTTGGAAATTGACTAATCCCCTTAATACTTGGAGCCCCTGATATAGCCTTCCCTCGACTTAATAATATAAGATTTTGACTACTACCTCCTTCTTTGATATTCCTATTAATAAGAAGATTTATTGATAAAGGAGTAGGAACAGGATGAACAGTTTATCCCCCTTTATCCTCAACCTTAGCTCATGAAGGAGCCTCTGTAGACTTAGGTATCTTTAGATTACATATAGCTGGTATTTCATCAATTTTAGGAGCTATAAATTTTATCTCAACAATTATTAATATACACCCCAAAGGAATAAAACTTGAACAATTAACTTTATTCTCATGAGCTGTAAAAATTACTGCAATTCTACTTCTTCTTTCTTTACCAGTATTAGCTGGAGCAATCACTATATTATTAACTGACCGAAATATTAACACTTCTTTTTTTGACCCTGCAGGAGGGGGAGACCCAATTTTATATCAACATTTATTT
>PSFOR710-13|BC-PNEF-PSFOR0587|Phloeotribus spinulosus|COI-5P
AACCTTATATTTTATTTTTGGTGCCTGATCAAGAATAATTGGTACATCTTTAAGAATGTTGATCCGAACTGAATTAGGTACACCAAATAATTTAATTGGAGATGATCAAATTTATAATACAATTGTAACAGCTCATGCATTTATTATAATTTTTTTTATAGTAATACCTATTTTAATTGGAGGTTTTGGAAATTGATTAATCCCATTAATACTAGGAGCTCCAGATATAGCTTTTCCTCGTCTTAATAATATAAGATTCTGACTTTTACCTCCTTCTTTAATTCTTCTATTAATAAGAAGATTTATT---------------------------------------------------------------------------------------------------------------------------------------------------------------------------------------------------------------------------------------------------------------------------------------------------------------------------------------------------------------
>PSFOR276-13|BC-PNEF-PSFOR0248|Phloiotrya rufipes|COI-5P
AACATTATATTTTATTTTCGGAGCATGATCAGGAATAGTAGGAACTTCTCTAAGAATACTGATTCGATCAGAATTAGGAAATTCTAGATCTTTAATTGGAGATGATCAAGTATATAATGTAATTGTTACTGCTCATGCTTTTATTATAATTTTTTTTATAGTTATACCTATTATAATAGGAGGATTTGGAAATTGATTAGTTCCTCTTATACTAGGTGCTCCTGATATAGCTTTTCCTCGTATAAATAATATAAGATTTTGACTTTTACCTCCTTCTTTAACTTTATTAATTATAAGAAGAATTGTAGAAAATGGAGCAGGAACTGGATGGACAGTTTACCCGCCTTTATCTTCAAATATTGCTCATAGAGGATCTTCTGTTGATTTAGCTATTTTTAGTCTTCATTTAGCAGGAGTATCATCAATTCTAGGTGCAGTAAATTTTATTACAACTATTATTAATATACGACCTTTAGGAATAACTTTTGATCGTATACCTTTATTTGTTTGGTCAGTAGGAATTACAGCCATTTTACTTTTACTTTCATTACCTGTTTTAGCAGGAGCTATTACTATACTTTTGACAGATCGAAATTTAAATACATCATTTTTTGATCCTGCTGGTGGAGGTGACCCAATTCTATATCAACATTTATTT
>PSFOR906-14|BC-PASSIFOR0125|Phloiotrya rufipes|COI-5P
AACATTATATTTTATTTTCGGAGCATGATCAGGAATAGTAGGAACTTCTCTAAGAATACTGATTCGATCAGAATTAGGAAATTCTAGATCTTTAATTGGAGATGATCAAGTATATAATGTAATTGTTACTGCTCATGCTTTTATTATAATTTTTTTTATAGTTATACCTATTATAATAGGAGGATTTGGAAATTGATTAGTTCCTCTTATACTAGGTGCTCCTGATATAGCTTTTCCTCGTATAAATAATATAAGATTTTGACTTTTACCTCCTTCTTTAACTTTATTAATTATAAGAAGAATTGTAGAAAATGGAGCAGGAACTGGATGGACAGTTTACCCGCCTTTATCTTCAAATATTGCTCATAGAGGATCTTCTGTTGATTTAGCTATTTTTAGTCTTCATTTAGCAGGAGTATCATCAATTCTAGGTGCAGTAAATTTTATTACAACTATTATTAATATACGACCTTTAGGAATAACTTTTGATCGTATACCTTTATTTGTTTGGTCAGTAGGAATTACAGCCATTTTACTTTTACTTTCATTACCTGTTTTAGCAGGAGCTATTACTATACTTTTGACAGATCGAAATTTAAATACATCATTTTTTGATCCTGCTGGTGGAGGTGACCCAATTCTATATCAACATTTATTT
>PSFOR277-13|BC-PNEF-PSFOR0249|Phloiotrya tenuis|COI-5P
TACATTATATTTTATTTTCGGCGCTTGAGCAGGAATAATTGGAACTTCATTAAGATTATTAATTCGATCAGAATTAGGAAATTCTGGATCATTAATTGGTGATGATCAAATCTATAATGTAATCGTTACTGCTCATGCTTTTATTATAATTTTTTTTATAGTTATACCTATTATAATAGGAGGATTTGGAAATTGATTAGTCCCATTAATATTAGGAGCTCCTGATATAGCTTTCCCTCGAATAAATAATATAAGATTTTGACTTCTTCCCCCTTCTCTAACTTTATTAATTATAAGAAGAATCGTAGAAAATGGTGCTGGAACAGGTTGAACAGTTTACCCTCCTTTATCTTCAAATATAGCTCATAGAGGTTCATCTGTAGATTTAGCTATTTTTAGATTACATCTAGCAGGAGTCTCTTCAATTTTAGGTGCTGTAAATTTTATTACAACTATTATTAATATACGCCCAATTGGAATATCTTTTGATCGAATACCTTTATTTGTTTGATCTATTGGAATTACAGCAGTTCTACTTCTTTTATCATTGCCAGTATTGGCAGGAGCTATTACTATACTTTTGACAGATCGAAATCTTAATACTTCTTTTTTTGATCCTGCAGGTGGCGGAGATCCAATTTTATACCAACATTTATTT
>PSFOR455-13|BC-PNEF-PSFOR0427|Phymatodes testaceus|COI-5P
AACCCTTTACTTCATCTTCGGAGCATGAGCAGGAATAGTAGGAACATCTCTAAGAATGTTAATTCGTTCAGAATTAGGAAATCCTGGATCCCTTATTGGAGATGACCAAATCTATAACGTAATCGTTACAGCCCATGCATTTATTATAATTTTCTTTATAGTAATACCCGTGATAATTGGAGGATTTGGGAACTGACTAGTTCCATTAATACTAGGAGCCCCAGATATAGCTTTTCCACGAATAAATAATATAAGATTTTGACTTTTACCCCCTTCTTTGACCCTTTTAATCATAAGAAGAATTGTAGAAAACGGTGCCGGAACAGGATGAACAGTTTACCCCCCTCTTTCTGCCAATGTAGCCCATAGAGGATCATCTGTAGATTTAGCAATTTTTAGTCTTCACCTAGCAGGTGTCTCATCTATTCTTGGAGCTGTAAATTTTATTTCTACAGTAATCAATATGAAACCTGCAGGTATAACCCCAGAACAAATACCTCTATTTGTATGAGCTGTTCTAATTACAGCAATTCTACTTCTCTTATCTTTACCTGTTTTAGCAGGAGCCATTACCATGTTATTAACTGATCGAAATCTAAATACATCCTTCTTTGACCCAGCAGGAGGAGGGGACCCTATTCTGTACCAACACTTATTT
>PSFOR445-13|BC-PNEF-PSFOR0417|Phymatodes testaceus|COI-5P
--CCCTTTACTTCATCTTTGGAGCATGAGCAGGAATAGTAGGAACATCTCTAAGAATGTTAATTCGTTCAGAATTAGGAAATCCTGGATCCCTTATTGGAGATGACCAAATCTATAACGTAATCGTTACAGCCCATGCATTTATTATAATTTTCTTTATAGTAATACCCGTAATAATTGGAGGATTTGGGAACTGACTAGTTCCATTAATACTAGGAGCCCCAGATATAGCTTTTCCACGAATAAATAATATAAGATTCTGACTTTTACCCCCTTCTTTGACCCTTTTAATCATAAGAAGAATTGTAGAAAATGGTGCCGGAACAGGATGAACAGTTTACCCCCCTCTTTCTGCCAATGTAGCCCATAGAGGATCATCTGTAGATTTAGCAATTTTTAGTCTTCACCTAGCAGGTGTCTCATCTATTCTTGGAGCTGTAAATTTTATTTCTACAGTAATCAATATAAAACCTGCAGGTATAACCCCAGAACAAATACCGCTATTTGTATGAGCTGTTCTAATTACAGCAATTCTACTTCTCTTATCTTTACCTGTTTTAGCAGGAGCCATTACAATGTTATTAACTGATCGAAACCTAAATACATCCTTCTTTGACCCAGCAGGAGGAGGAGACCCTATTCTGTACCAACACTTATTT
>PSFOR431-13|BC-PNEF-PSFOR0403|Phymatodes testaceus|COI-5P
AACCCTTTACTTCATCTTCGGAGCATGAGCAGGAATAGTAGGAACATCTCTAAGAATGTTAATTCGTTCAGAATTAGGAAATCCTGGATCCCTTATTGGAGATGACCAAATCTATAACGTAATCGTTACAGCCCATGCATTTATTATAATTTTCTTTATAGTAATACCCGTAATAATTGGAGGATTTGGGAACTGACTAGTTCCATTAATACTAGGAGCCCCAGATATAGCTTTTCCACGAATAAATAATATAAGATTTTGACTTTTACCCCCTTCTTTAACCCTTTTAATCATAAGAAGAATTGTAGAAAACGGTGCCGGAACAGGATGAACAGTTTACCCTCCTCTTTCTGCCAATGTAGCCCATAGAGGATCATCTGTAGATTTAGCAATTTTTAGTCTTCACCTAGCAGGTGTCTCATCTATTCTTGGAGCTGTAAATTTTATTTCTACAGTAATCAATATGAAACCTGCAGGTATAACCCCAGAACAAATACCTCTATTTGTATGAGCTGTTCTAATTACAGCAATTCTACTTCTCTTATCTTTACCTGTTTTAGCAGGAGCCATTACCATGTTATTAACTGATCGAAATCTAAATACATCCTTCTTTGACCCAGCAGGAGGAGGGGACCCTATTCTGTACCAACACTTATTT
>PSFOR1051-14|PASSIFOR-NM13-071|Phymatodes testaceus|COI-5P
AACCCTTTACTTCATCTTCGGAGCATGAGCAGGGATAGTAGGAACATCTCTAAGAATGTTAATTCGTTCAGAATTAGGAAATCCTGGATCCCTTATTGGAGATGACCAAATCTATAACGTAATCGTTACAGCCCATGCATTTATTATAATTTTCTTTATAGTAATACCCGTGATAATTGGAGGATTTGGGAACTGACTAGTTCCATTAATACTAGGAGCCCCAGATATAGCTTTTCCACGAATAAATAATATAAGATTTTGACTTTTACCCCCTTCTTTGACCCTTTTAATCATAAGAAGAATTGTAGAAAACGGTGCCGGAACAGGATGAACAGTTTACCCCCCTCTTTCTGCCAATGTAGCCCATAGAGGATCATCTGTAGATTTAGCAATTTTTAGTCTTCACCTAGCAGGTGTCTCATCTATTCTTGGAGCTGTAAATTTTATTTCTACAGTAATCAATATGAAACCTGCAGGTATAACCCCAGAACAAATACCTCTATTTGTATGAGCTGTTCTAATTACAGCAATTCTACTTCTCTTATCTTTACCTGTTTTAGCAGGAGCCATTACCATGTTATTAACTGATCGAAATCTAAATACATCCTTCTTTGACCCAGCAGGAGGAGGGGACCCTATTCTGTACCAACACTTATTT
>PSFOR145-13|BC-PNEF-PSFOR0117|Pidonia lurida|COI-5P
AACTCTTTACTTTATTTTTGGAGCTTGAGCAGGAATGGTCGGAACATCTTTAAGATTATTAATTCGTACAGAATTAGGAAACCCTGGATCTTTAATTGGTGATGATCAAATTTATAATGTAATTGTAACAGCCCATGCTTTTATTATGATTTTTTTTATAGTTATACCTATTATAATTGGAGGATTCGGAAATTGATTAGTTCCCCTTATATTAGGAGCTCCTGATATAGCTTTTCCCCGAATAAACAATATAAGATTTTGATTACTTCCCCCTTCTCTTACTCTTTTATTAATAAGGAGAATTGTAGAAAAAGGAGCAGGAACTGGATGAACGGTTTATCCCCCCCTTTCATCAAATATTGCTCATGGAGGTTCTTCTGTTGATTTAGCTATTTTTAGATTACATTTAGCAGGAATTTCATCAATTTTAGGAGCAGTAAATTTTATTACAACAATTATTAATATACGACCAGCAGGAATACATCCTGATCAAATACCCCTTTTTGTTTGAGCTGTATTAATTACAGCCGTTTTACTTCTTCTATCCCTTCCTGTTTTAGCTGGAGCTATTACTATACTTTTAACTGATCGAAATTTAAATACTTCATTTTTTGATCCGGCAGGAGGTGGTGATCCAATTCTTTACCAACACTTATTT
>PSFOR802-13|BC-PNEF-PSFOR0679|Pityophagus ferrugineus|COI-5P
CACTCTTTATTTTATTTTTGGAGCCTGATCTGGAATAATTGGAACGTCATTAAGATTACTAATTCGATCTGAATTAGGAAACCCAGGATCATTGATTGGAGATGACCAAATTTATAATGTAATTGTTACTGCTCATGCATTTATTATAATTTTTTTTATAGTTATACCTTTTATAATTGGAGGATTTGGGAATTGATTAGTCCCTTTAATACTTGGAGCTCCTGATATAGCTTTTCCTCGACTTAATAATATAAGATTTTGGTTATTACCCCCTTCCATTTCTTTATTATTAATAAGAAGAATCGTAGAAAGAGGAGCCGGAACAGGATGAACTGTTTACCCACCTTTATCCTCTAATATCGCTCATGGAGGATCTTCTGTAGATTTAGCAATTTTTAGATTACATCTTGCAGGGATTAGATCAATTCTTGGTGCAGTGAATTTTATTACTACGGTTATTAATATACGACCAAGAGGGATATCA------------------------------------------------------------------------------------------------------------------------------------------------------------------------------
>PSFOR647-13|BC-PNEF-PSFOR0524|Pityophagus laevior|COI-5P
CACTCTTTATTTTATTTTTGGAGCCTGATCTGGAATAATTGGAACATCATTAAGATTATTAATTCGATCTGAGTTAGGAAACCCAGGATCATTAATTGGAGATGACCAAATTTATAATGTAATTGTTACTGCTCATGCATTTATTATAATTTTTTTTATAGTTATACCTTTTATAATTGGAGGGTTTGGGAATTGATTAGTCCCTTTAATACTTGGAGCTCCTGATATAGCTTTTCCTCGACTTAATAATATGAGATTTTGGTTATTACCCCCTTCCATTTCTTTATTATTAATAAGAAGAATCGTAGAAAGAGGAGCCGGAACAGGATGAACTGTTTACCCACCTTTATCCTCTAATATCGCTCATGGAGGATCTTCTGTAGATCTAGCAATTTTTAGATTACATCTTGCAGGGATTAGATCAATTCTTGGTGCAGTGAATTTTATTACTACAGTTATTAATATACGACCAAGAGGAATATCATTTGATCGAATACCTTTATTTGTTTGAGCAGTAACAATTACTGCAATTTTATTATTACTTTCACTACCTGTTCTTGCAGGAGCAATTACAATATTATTAACTGATCGAAATTTAAATACATCATTCTTTGACCCCGCTGGGGGAGGAGATCCAATTCTCTATCAACATTTATTT
>PSFOR074-13|BC-PNEF-PSFOR0046|Plagionotus arcuatus|COI-5P
AACTCTTTATTTTATTTTCGGAGTATGAGCAGGTATAGTAGGAACATCCCTCAGAGTCCTTATTCGATCGGAATTAGGTAACCCAGGATCTCTTATTGGAGACGACCAAATTTACAATGTAATCGTAACTGCCCATGCATTTATTATAATTTTCTTTATAGTTATGCCAATCATAATTGGTGGATTCGGAAATTGACTTGTTCCCCTGATATTAGGGGCCCCCGACATAGCATTCCCACGAATAAACAACATAAGATTTTGGCTCTTACCCCCATCTCTAACTCTTCTTCTAATAAGAAGAATTGTAGAAAATGGAGCTGGAACTGGATGAACAGTTTACCCACCCCTTTCCGCAAATATCGCCCATAGAGGTTCATCCGTTGATTTAGCAATTTTCAGGCTACATCTAGCTGGTATTTCCTCTATTCTAGGAGCTGTTAATTTTATTTCCACAGTAATTAATATACGGCCAACAGGAATAAGGCTAGAGCAGATGCCATTATTTGTATGGGCAGTTGTAATCACCGCAATTCTACTCTTGCTTTCTCTACCTGTACTTGCAGGGGCAATTACAATGTTATTAACAGATCGTAATATCAATACATCATTTTTTGACCCAGCAGGAGGGGGAGACCCAATTCTTTATCAACATTTATTT
>PSFOR010-13|BC-PASSIFOR0010|Plagionotus arcuatus|COI-5P
AACTCTTTATTTTATTTTCGGAGTATGAGCAGGTATAGTAGGAACATCCCTCAGAGTCCTTATTCGATCGGAATTAGGTAACCCAGGATCTCTTATTGGAGACGACCAAATTTACAATGTAATCGTAACTGCCCATGCATTTATTATAATTTTCTTTATAGTTATGCCAATCATAATTGGTGGATTCGGAAATTGACTTGTTCCCCTGATATTAGGGGCCCCCGACATAGCATTCCCACGAATAAACAACATAAGATTTTGGCTCTTACCCCCATCTCTAACTCTTCTTCTAATAAGAAGAATTGTAGAAAATGGAGCTGGAACTGGATGAACAGTTTACCCACCCCTTTCCGCAAATATCGCCCATAGAGGTTCATCCGTTGATTTAGCAATTTTCAGGCTACATCTAGCTGGTATTTCCTCTATTCTAGGAGCTGTTAATTTTATTTCCACAGTAATTAATATACGGCCAACAGGAATAAGGCTAGAGCAGATGCCATTATTTGTATGGGCAGTTGTAATCACCGCAATTCTACTCTTGCTTTCTCTACCTGTACTTGCAGGGGCAATTACAATGTTATTAACAGATCGTAATATCAATACATCATTTTTTGACCCAGCAGGAGGGGGAGACCCAATTCTTTATCAACATTTATTT
>PSFOR640-13|BC-PNEF-PSFOR0517|Platycis cosnardi|COI-5P
-----------------------------------------------------------------------------------------------------------------------------------------------------------------------------------------------------------------------------------------------------------TAAGGTTCTGGCTATTACCCCCATCACTAGCGCTCTTAATTATAAGAAGATTAACAGAAAGAGGTGCAGGAACTGGATGAACAGTTTACCCCCCGCTCTCTTCAAATATCGCTCATAGAGGAACATCAGTTGATTTAGCTATTTTCAGCCTCCATTTAGCTGGAATATCATCAATTTTAGGTGCAGTAAATTTCATTTCTACAGTTATCAACATAAAATCACCAAATATAACTCTTGAACAAATACCCCTATTTGTTTGAGCTGTAGTAATCACAGCCTTCCTACTACTTCTATCTTTACCTGTACTTGCAGGAGCAATTACAATATTATTAG--------------------------------------------------------------------------
>PSFOR222-13|BC-PNEF-PSFOR0194|Platydema europaeum|COI-5P
AACACTTTATTTTATCTTTGGAGCTTGATCAGGTATAGTAGGTACATCATTAAGACTATTAATTCGAGCAGAACTAGGAAATCCAGGATCTCTAATTGGAGACGATCAAATCTATAATGTAATTGTCACCGCCCATGCTTTTATTATAATTTTCTTCATAGTAATACCAATTATAATTGGTGGATTCGGAAATTGATTAGTTCCTTTAATATTAGGGGCACCTGATATAGCATTCCCCCGGTTAAATAATATGAGATTTTGACTTCTTCCCCCTTCTTTAACTCTCCTTCTAATAAGAAGAATTGTAGAGAGAGGAGCTGGGACAGGATGAACTGTTTACCCTCCCTTATCTTCAAACATTGCTCATGGAGGATCTTCTGTTGATTTAGCAATTTTTAGACTTCATTTAGCTGGAATTTCTTCAATTCTAGGAGCAGTAAATTTTATTACAACCGTGATTAATATACGACCTCAAGGAATAACCTTTGACCGAATACCTTTATTTGTTTGAGCAGTTGTAATTACTGCAGTGCTTTTACTTCTTTCTCTTCCAGTCCTAGCAGGAGCTATTACAATACTTTTAACTGATCGAAATATTAATACCTCGTTTTTCGACCCAGCAGGAGGTGGGGATCCAATTTTATATCAACATTTATTC
>PSFOR392-13|BC-PNEF-PSFOR0364|Platydema violaceum|COI-5P
AACTTTATACTTCATATTTGGAGCCTGATCAGGAATAACAGGAACCTCATTAAGACTACTAATTCGAGCAGAACTTGGAAACCCCGGCTCCTTAATTGGAGACGATCAAATCTACAATGTAATTGTTACAGCTCATGCTTTTATCATAATTTTTTTCATAGTTATACCCATTATAATTGGAGGATTTGGAAATTGATTAGTACCTTTAATGCTTGGAGCCCCCGACATAGCATTTCCACGAATAAACAACATAAGATTTTGACTTCTACCCCCCTCACTTACCCTTCTTTTAATGAGAAGAGTTGTAGAAAACGGAGCAGGAACAGGATGAACAGTTTACCCCCCACTTTCATCTAACATCGCTCATGGAGGATCTTCAGTTGACCTTGCAATCTTTAGGCTTCACCTAGCCGGAATTTCCTCAATCTTAGGAGCAGTAAATTTTATTACAACCGTGATTAATATACGACCTCAAGGAATAACTTTTGATCGTATACCTCTTTTCGTATGAGCAGTTGTTATTACTGCAATCCTTCTTCTCCTGTCACTTCCAGTTCTTGCAGGAGCAATCACCATGCTTTTAACTGACCGAAATATTAATACATCCTTTTTCGACCCAGCAGGAGGTGGTGATCCAATTTTGTACCAACACTTATTC
>PSFOR223-13|BC-PNEF-PSFOR0195|Platydema violaceum|COI-5P
AACTTTATACTTCATATTTGGAGCCTGATCAGGAATAACAGGAACCTCATTAAGACTACTAATTCGAGCAGAACTTGGAAACCCCGGCTCCTTAATTGGAGACGATCAAATCTACAATGTAATTGTTACAGCTCATGCTTTTATCATAATTTTTTTCATAGTTATACCCATTATAATTGGAGGATTTGGAAATTGATTAGTACCTTTAATGCTTGGAGCCCCCGACATAGCATTTCCACGAATAAACAACATAAGATTTTGACTTCTACCCCCCTCACTTACCCTTCTTTTAATGAGAAGAGTTGTAGAAAACGGAGCAGGAACAGGATGAACAGTTTACCCCCCACTTTCATCTAACATCGCTCATGGAGGATCTTCAGTTGACCTTGCAATCTTTAGGCTTCACCTAGCCGGAATTTCCTCAATCTTAGGAGCAGTAAATTTTATTACAACCGTGATTAATATACGACCTCAAGGAATAACTTTTGATCGTATACCTCTTTTCGTATGAGCAGTTGTTATTACTGCAATCCTTCTTCTCCTGTCACTTCCAGTTCTTGCAGGAGCAATCACCATGCTTTTAACTGACCGAAATATTAATACATCCTTTTTCGACCCAGCAGGAGGTGGTGATCCAATTTTGTACCAACACTTATTC
>PSFOR492-13|BC-PASSIFOR0065|Platydema violaceum|COI-5P
AACTTTATACTTCATATTTGGAGCCTGATCAGGAATAACAGGAACCTCATTAAGACTACTAATTCGAGCAGAACTTGGAAACCCCGGCTCCTTAATTGGNGACGATCAAATCTACAATNTAATTGTTACAGCTCATGCTTTTATCATAATTTTTTTCATAGTTATACCCATTATAATTGGAGGATTTGGAAATTGATTAGTACCTTTAATGCTTGGAGCCCCCGACATAGCATTTCCACGAATAAACAACATAAGATTTTGACTTCTACCCCCCTCACTTACCCTTCTTTTAATGAGAAGAGTTGTAGAAAACGGAGCAGGAACAGGATGAACAGTTTACCCCCCACTTTCATCTAACATCGCTCATGGAGGATCTTCAGTTGANCTTGCAATCTTTAGGCTTCACCTAGCCGGAATTTCCTCAATCTTAGGAGCAGTAAATTTTATTACAACCGTGATTAATAT-------------------------------------------------------------------------------------------------------------------------------------------------------------------------------------------------
>PSFOR800-13|BC-PNEF-PSFOR0677|Platypus cylindrus|COI-5P
---------------------------------------------------AAGAATAATTATTCGAATTGAATTAGGAACACCTGGATCATTTATTGGAAATGATCAAATTTATAATGTTATTGTAACAGCTCATGCATTTATTATAATTTTCTTTATAGTTATACCAATTATAATTGGAGGATTTGGAAACTGGTTAGTTCCTCTTATATTAGGGGCTCCTGATATAGCTTTTCCTCGACTAAATAATATAAGATTCTGACTTCTTCCTCCTTCTCTTTCATTTTTAATTCTAAGAAGAATAGTAGAAAGAGGGGCTGGAACTGGCTGAACTGTTTATCCTCCTCTAGCATCTAATATTGCTCATAGAGGTTCTTCTGTAGATTTAGCAATTTTTAGTCTTCATATAGCAGGAGTTTCATCTATTCTAGGAGCTATTAATTTTATTTCAACTGCCATTAATATACGACCTCAAGGAATAAATTTAGATCAAATATCTTTATTTATTTGAGCAGTTTTAATTACTGCTGTTCTTTTACTTTTAAGTTTACCAGTTTTAGCTGGAGCAATTACTATATTATTAACAGATCGAAATATCAATACATGTTTTTTTGATCCTGCAGGAGGAGGAGATCCAATTTTATACCAACATTTATTT
>PSFOR1071-14|PASSIFOR-NM13-091|Platypus cylindrus|COI-5P
------------------------------------TGTAGGAACATCATTAAGAATAATTATTCGAATTGAATTAGGAACACCTGGATCATTTATTGGAAATGATCAAATTTATAATGCTATTGTTACAGCTCATGCATTTATTATAACTTTTTTTATAGTTATACCAATTATAATTGGAGGATTTGGAAACTGATTAGTTCCTCTTATACTAGGAGCTCCTAATATAGCTTTTCCTCGACTAAATAATATAAGATTTTGACTTCTTCCTCCATCACTTTCATTTTTAATTTTAAGAAGAATAGTAGAAAGAGGAGCCGGAACTGGCTGAACTGTTTATCCTCCTCTAGCATCTAATATTGCTCATAGAGGTTCTTCTGTAGATTTAGCAATTTTTAGTCTTCATATAGCAGGAGTTTCATCTATATTAGGAGCTATTAATTTTATTTCAACTGCCATTAATATACGACCCCAAGGAATAAATTTAGATCAAATATCTTTATTTATTTGAGCAGTTTTAATTACTGCTGTTCTTTTACTCTTAAGTTTACCAGTTTTAGCTGGAGCAATTACTATATTATTAACAGATAGAAATATTAATACNTGTTTTTTTGATCCTGCAGGAGGACGAGATCCAATTTTATATCAACATTTATTT
>PSFOR173-13|BC-PNEF-PSFOR0145|Platyrhinus resinosus|COI-5P
TACTCTTTATTTTATTTTTGGGGCTTGAGCCGGAATATTAGGAACATCTTTAAGAATTTTAATCCGAACTGAACTTGGAAATCCTGGATCTTTAATTGGAGATGACCAAATTTATAATGTAATTGTTACTGCTCATGCTTTTATCATAATTTTTTTTATAGTGATACCCACTATAATGGGAGGATTTGGAAATTGATTAGTCCCTATCATATTAGGAGCCCCTGATATAGCTTTCCCTCGAATAAATAACATAAGATTTTGGTTACTCCCCCCTTCTTTAACTCTTCTAATTATAAGAAGAATTGTAGAAAGAGGAGCTGGAACAGGATGAACTGTTTACCCCCCTTTATCTTCTAACATTGCTCATGGAGGTGCTTCTGTTGATTTAGCTATTTTCAGACTTCATTTAGCAGGAATTTCCTCCATTCTTGGAGCAGTAAATTTTATTACCACAATTATTAATATACGGCCTTCAGGTATAACTCTTGATCGAACACCTTTATTTGTATGGGCAATTGGAATTACTGCCCTTCTTCTCCTTTTATCTTTACCAGTATTAGCTGGGGCAATTACAATACTTTTAACAGATCGAAATCTTAATACCTCTTTTTTTGACCCAGCAGGAGGAGGAGATCCAATTCTTTATCAACACTTATTT
>PSFOR174-13|BC-PNEF-PSFOR0146|Platystomos albinus|COI-5P
TACTTTATATTTTATTTTTGGTGCATGAGCAGGAATAATAGGAACATCTCTAAGAATTCTAATTCGTACAGAATTAGGAACCCCCAGCTCCTTAATTGGAGATGACCAAATTTATAATGTAATTGTCACAGCTCATGCATTTGTCATAATTTTTTTTATAGTAATGCCTACAATAATTGGAGGATTTGGAAATTGACTTGTACCTTTAATGTTGGGAGCCCCCGATATAGCATTCCCTCGTATAAATAACATAAGATTCTGACTCCTGCCCCCCTCACTTATTCTTTTAACTATAAGAAGAATTGTAGAAAAAGGAGCTGGTACTGGTTGAACAGTCTATCCCCCCCTCGCCTCCAATATTGCACATAGAGGAGCATCAGTAGACTTAGCTATTTTCAGATTACACTTAGCCGGAGTATCCTCTATTCTAGGAGCAGTAAATTTTATTACTACAATTATTAATATACGACCTGAAGGTATAACCCCTGATCGACTACCCTTATTTGTTTGAGCTGTAGGTATCACAGCCCTTCTTCTTCTTTTATCTTTACCTGTTCTTGCAGGAGCAATTACTATGTTATTAACCGACCGAAATCTTAACACAACTTTTTTTGATCCTGCAGGAGGAGGCGACCCTATCCTTTACCAGCATCTATTC
>PSFOR470-13|BC-PASSIFOR0043|Platystomos albinus|COI-5P
TACTTTATATTTTATTTTTGGTGCATGAGCAGGAATAATAGGAACATCTCTAAGAATTCTAATTCGTACAGAATTAGGAACCCCCAGCTCCTTAATTGGAGATGACCAAATTTATAATGTAATTGTCACAGCTCATGCATTTGTCATAATTTTTTTTATAGTAATGCCTACAATAATTGGAGGATTTGGAAATTGACTTGTACCTTTAATGTTGGGAGCCCCCGATATAGCATTCCCTCGTATAAATAACATAAGATTCTGACTCCTGCCCCCCTCACTTATTCTTTTAACTATAAGAAGAATTGTAGAAAAAGGAGCTGGTACTGGTTGAACAGTCTATCCCCCCCTCGCCTCCAATATTGCACATAGAGGAGCATCAGTAGACTTAGCTATTTTCAGATTACACTTAGCCGGAGTATCCTCTATTCTAGGAGCAGTAAATTTTATTACTACAATTATTAATATACGACCTGAAGGTATAACCCCTGATCGACTACCCTTATTTGTTTGAGCTGTAGGTATCACAGCCCTTCTTCTTCTTTTATCTTTACCTGTTCTTGCAGGAGCAATTACTATGTTATTAACCGACCGAAATCTTAACACAACTTTTTTTGATCCTGCAGGAGGAGGCGACCCTATCCTTTACCAGCATCTATTC
>PSFOR1013-14|PASSIFOR-NM13-033|Plegaderus dissectus|COI-5P
TACCTTATATTTCATCTTTGGGGCATGAGCAGGAATAGTAGGGACCTCTCTCAGATTATTAATCCGGGCAGAACTAGGGAATCCAGGTTCACTAATTGGAGACGACCAGATTTACAATGTAATTGTTACAGCCCATGCTTTCATTATGATTTTCTTTATAGTAATGCCTATCATAATGGGAGGATTCGGAAACTGATTAGTTCCATTAATATTAGGAGCCCCTGATATAGCATTCCCTCGAATAAATAACATAAGATTCTGGCTCCTCCCCCCTTCCCTTACCCTTCTATTGATAAGAAGAATGGTAGAAAGAGGTGCCGGAACAGGATGGACAGTATATCCTCCTTTAGCCTCAAATATCGCCCATGGAGGGGCATCTGTTGATTTAGCTATTTTCAGTTTACACTTAGCCGGTATCTCATCTATCCTAGGTGCTGTAAATTTTATTACTACAGTTATTAATATGCGAACCCCGGGCATAACATTCGACCGAATACCCCTATTCGTTTGATCTGTAGCAATCACAGCCTTGCTGCTTCTACTATCACTACCAGTTTTAGCGGGGGCTATCACTATATTGTTAACAGATCGAAATTTAAACACCACATTCTTCGACCCTGCTGGGGGAGGAGATCCTATCCTATACCAACACTTATTC
>PSFOR758-13|BC-PNEF-PSFOR0635|Podeonius acuticornis|COI-5P
AACCCTATACTTCATTTTCGGCGCATGGTCCGGAATACTAGGAACATCCTTAAGACTTCTAATCCGAGCTGAACTTGGTAACCCCGGCTCACTAATTGGAAATGATCAAATTTATAACGTCGTTGTTACTGCCCATGCTTTTATCATAATTTTCTTCATAGTTATACCCATCATAATTGGAGGATTCGGAAACTGACTAGTCCCCCTTATACTAGGAGCTCCTGATATAGCATTCCCACGAATAAATAACATAAGATTCTGATTTTTACCACCATCCTTAAGACTTCTTCTAATAAGAAGAATTGTTGAAAGAGGAGCTGGCACCGGATGAACAGTTTACCCTCCCCTATCATCAAATATCGCCCATAGAGGATCTTCAGTTGATTTAGCAATTTTTAGTCTCCACTTAGCTGGAATTTCTTCCATTCTAGGAGCCGTAAACTTTATTTCAACAGTTATCAATATACGATCAACAGGAATCTCCTTTGACCGAATACCTCTCTTCGTATGAGCAGTAGTAATTACTGCTGTTCTACTCCTTCTCTCTCTCCCTGTCCTAGCAGGGGCAATCACTATGCTATTAACCGACCGAAACTTAAATACCACATTCTTTGATCCTGCAGGAGGAGGGGATCCAATTCTTTACCAACATCTATTC
>PSFOR967-14|BC-PSFOR-JD0121|Podeonius acuticornis|COI-5P
AACCCTATACTTCATTTTCGGCGCATGGTCCGGAATACTAGGAACATCCTTAAGACTTCTAATCCGAGCTGAACTTGGTAACCCCGGCTCACTAATTGGAAATGATCAAATTTATAACGTCGTTGTTACTGCCCATGCTTTTATCATAATTTTCTTCATAGTTATACCCATCATAATTGGAGGATTCGGAAACTGACTAGTCCCCCTTATACTAGGAGCTCCTGATATAGCATTCCCACGAATAAATAACATAAGATTCTGATTTTTACCGCCATCCTTAAGACTTCTTCTAATAAGAAGAATTGTTGAAAGAGGAGCTGGCACCGGATGAACAGTTTACCCTCCCCTATCATCAAATATCGCCCATAGAGGATCTTCAGTTGATTTAGCAATTTTTAGTCTCCACTTAGCTGGAATTTCTTCCATTCTAGGAGCCGTAAACTTTATTTCAACAGTTATCAATATACGATCAACAGGAATCTCCTTTGACCGAATACCTCTCTTCGTATGAGCAGTAGTAATTACTGCTGTTCTACTCCTTCTCTCTCTCCCTGTCCTAGCAGGGGCAATCACTATGCTATTAACCGACCGAAACTTAAATACCACATTCTTTGATCCTGCAGGAGGAGGGGATCCAATTCTTTACCAACATCTATTC
>PSFOR076-13|BC-PNEF-PSFOR0048|Poecilium alni|COI-5P
AACACTTTACTTCATCTTCGGTGCATGAGCAGGAATAGTAGGAACTTCCCTCAGAATTCTTATTCGATCTGAATTAGGAAATCCTGGATCATTAATTGGAGATGACCAAATTTACAACGTAATCGTTACAGCTCATGCATTCATTATAATTTTCTTTATAGTAATACCTATTATAATTGGCGGATTTGGAAATTGATTAGTACCTTTAATATTAGGAGCACCTGATATAGCATTCCCACGAATAAACAATATAAGATTTTGACTTTTACCACCATCCCTAAGATTACTAATTATAAGAAGAGTAGTTGAAAGTGGAGCAGGAACAGGATGAACTGTTTACCCACCATTATCAGCTAATATTGCACATAGAGGAGCTTCTGTAGACTTAGCAATCTTCAGACTTCACCTAGCAGGTGTTTCATCTATCCTAGGAGCTGTAAATTTTATTTCAACAATTATTAATATAAAACCTGCAGGAATAACACCTGAACAAATACCTTTATTTGTTTGAGCTGTATTAATTACTGCTGTTTTACTTCTTCTATCCCTACCAGTACTGGCCGGTGCAATTACTATATTATTAACAGATCGAAATTTAAATACATCATTTTTTGACCCTGCAGGAGGAGGTGATCCTATTCTATATCAACATTTATTC
>PSFOR021-13|BC-PASSIFOR0021|Poecilium alni|COI-5P
AACACTTTACTTCATCTTCGGTGCATGAGCAGGAATAGTAGGAACTTCCCTCAGAATTCTTATTCGATCTGAATTAGGAAATCCTGGATCATTAATTGGAGATGACCAAATTTACAACGTAATCGTTACAGCTCATGCATTCATTATAATTTTCTTTATAGTAATACCTATTATAATTGGCGGATTTGGAAATTGATTAGTACCTTTAATATTAGGAGCACCTGATATAGCATTCCCACGAATAAACAATATAAGATTTTGACTTTTACCACCATCCCTAAGATTACTAATTATAAGAAGAGTAGTTGAAAGTGGAGCAGGAACAGGATGAACTGTTTACCCACCATTATCAGCTAATATTGCACATAGAGGAGCTTCTGTAGACTTAGCAATCTTCAGACTTCACCTAGCAGGTGTTTCATCTATCCTAGGAGCTGTAAATTTTATTTCAACAATTATTAATATAAAACCTGCAGGAATAACACCTGAACAAATACCTTTATTTGTTTGAGCTGTATTAATTACTGCTGTTTTACTTCTTCTATCCCTACCAGTACTGGCCGGTGCAATTACTATATTATTAACAGATCGAAATTTAAATACATCATTTTTTGACCCTGCAGGAGGAGGTGATCCTATTCTATATCAACATTTATTC
>PSFOR146-13|BC-PNEF-PSFOR0118|Poecilium lividum|COI-5P
AACTCTCTACTTTATTTTTGGAGCATGAGCAGGAATAATTGGAACATCTCTAAGAATGCTTATTCGATCAGAACTTGGAAACCCAGGTTCTCTTTTTGGAAACGATCAAATCTACAATGTAATTGTTACAGCTCATGCATTTATCATAATTTTCTTTATAGTTATACCAGTAATAATTGGAGGATTTGGTAATTGACTAGTTCCTCTTATACTAGGAGCCCCTGATATAGCCTTCCCGCGAATAAACAATATAAGATTTTGATTATTACCTCCTTCTCTGACATTACTAATTATAAGAAGAGTAGTAGAAAACGGAGCCGGAACAGGATGAACTGTTTACCCCCCACTCTCATCTAATATCACCCATAGAGGATCTTCAGTTGATTTAGCAATTTTTAGCCTTCATTTAGCTGGTGTTTCATCCATTTTAGGAGCAGTTAATTTTATCTCAACAGTAATTAATATAAAACCCGCCGGAATAACTCCTGAACAAATACCTTTATTTACTTGAGCTGTAGTAATTACAGCTATTCTCCTTCTCTTATCCCTCCCAGTTCTTGCAGGAGCAATTACAATGCTTTTAACAGATCGAAATCTTAATACATCATTTTTTGATCCAGCAGGAGGGGGAGACCCAATTTTATATCAACACCTA---
>PSFOR147-13|BC-PNEF-PSFOR0119|Poecilium pusillum|COI-5P
AACTCTTTATTTTATTTTTGGTGCATGAGCAGGAATAGTTGGTACATCTCTTAGAATACTAATCCGTTCTGAACTAGGAAATCCTGGATCACTCATCGGAGACGACCAAATCTATAATGTAATCGTTACAGCTCATGCATTTGTCATAATCTTCTTTATAGTTATACCTATTATAATTGGAGGGTTCGGAAATTGATTAGTCCCACTTATATTAGGAGCCCCCGATATAGCCTTCCCACGAATAAATAATATAAGATTTTGACTTCTTCCTCCATCCCTTACCCTATTAATTATAAGAAGAATTGTTGAAAATGGAGCTGGAACAGGTTGAACTGTCTATCCACCATTATCATCCAATATTGCTCACAGAAGATCATCTGTTGATCTTGCAATCTTTAGTCTACATTTAGCAGGAGTATCCTCAATTCTTGGAGCAGTAAATTTTATTTCTACAGTAATTAATATAAAACCTGCTGGTATAACCCCAGAACAAATACCTTTATTTGTATGAGCTGTTCTAATTACAGCAATCCTTTTACTTTTATCACTTCCTGTACTAGCAGGAGCTATTACTATATTATTAACAGACCGAAATTTAAATACTTCATTCTTCGACCCCGCAGGAGGAGGAGATCCAATTCTATATCAGCATCTATTC
>PSFOR077-13|BC-PNEF-PSFOR0049|Poecilium rufipes|COI-5P
AACCCTTTACTTCGTATTTGGAGCATGGGCGGGAATGGTAGGAACTTCTCTAAGAATTTTAATTCGATCAGAATTAGGTAACCCAGGATCCCTTATTGGAGACGATCAAATTTACAACGTTATCGTTACAGCCCACGCCTTTATTATAATTTTCTTTATAGTTATACCAATCATAATTGGAGGATTCGGAAATTGACTCGTACCCTTAATATTAGGAGCCCCAGATATAGCTTTTCCACGAATAAACAACATAAGATTTTGACTTCTACCCCCATCATTGACACTCCTAATTATAAGAAGAGTAGTAGAAAACGGCGCCGGAACCGGATGAACAGTATATCCCCCTCTCTCATCTAATGTTGCCCATAGAGGTTCCTCTGTAGATTTAGCAATCTTTAGATTACATTTAGCAGGAGTATCATCCATTCTAGGAGCTGCAAACTTCATTTCCACAGTAATTAATATAAAACCCACAGGAATAACTCCTGAACAAATACCTTTATTTGTTTGAGCTGTTCTAATTACTGCAATTCTTCTTCTACTATCTCTTCCAGTCCTCGCAGGAGCAATCACAATGTTATTAACAGATCGTAATCTAAATACATCATTTTTTGATCCAGCTGGAGGAGGGGACCCAATTCTTTATCAGCACCTATTC
>PSFOR148-13|BC-PNEF-PSFOR0120|Pogonocherus caroli|COI-5P
AACACTTTATTTTATTTTTGGTGCTTGAGCAAGAATAGTGGGAACTTCATTAAGTCTTCTTATTCGTTCTGAACTAGGAAATCCGGGTTCCTTAATTGGAGATGATCAAATTTACAATGTAATTGTAACTGCTCATGCTTTTGTAATAATTTTTTTTATGGTTATACCAATTATAATTGGAGGATTCGGAAACTGATTAGTTCCACTAATACTAGGTGCCCCAGACATAGCTTTCCCTCGCATGAACAATATAAGGTTTTGACTCCTCCCACCTTCATTAACTTTACTTATAATAAGTAGAATTACTGAAAGAGGAGCTGGAACAGGATGAACAGTTTATCCACCTTTATCTTCTAATATTGCTCATAGTGGATCTTCTGTGGACTTAGCTATCTTCAGATTACATTTAGCTGGAATTTCTTCTATTCTAGGAGCTGTAAATTTTATTACAACAGTAATTAATATACGCCCTGCAGGCATAATTTACGAACGACTCCCATTATTTGTTTGAGCTGTAAAAATTACAGCAATTCTTTTACTTCTTTCATTACCAGTTCTTGCTGGTGCTATTACTATACTTTTAACTGATCGAAATTTAAACACCTCATTTTTTGACCCTGCAGGGGGTGGTGATCCAATCCTTTATCAACACTTATTT
>PSFOR149-13|BC-PNEF-PSFOR0121|Pogonocherus decoratus|COI-5P
AACTCTATACTTCCTTTTTGGTGCATGAGCAGGTATAGTAGGTACTTCTCTTAGTCTTTTAATTCGAAGGGAATTAGGAAACCCAGGGTCATTAATTGGAGATGACCAAATTTATAATGTTATTGTTACAGCTCATGCTTTTGTAATAATTTTCTTTATAGTTATGCCTGTAATAATTGGTGGGTTTGGAAATTGATTAGTTCCCTTAATATTAGGAGCACCAGATATGGCTTTCCCTCGAATAAACAATATAAGATTTTGACTTTTGCCACCTTCTCTTAGTCTTTTAATTATAAGAAGTATCACTGAAAGAGGAGCAGGAACAGGATGAACAGTTTATCCGCCCCTTTCTAGAAACATTGCCCATAGAGGTTCTTCTGTTGATTTAGCAATCTTTAGGCTTCATCTAGCAGGTATTTCTTCTATTTTAGGTGCAGTAAACTTTATTACAACCGTAATCAATATACGCCCTACGGGAATAATTTTTGAACGTTTACCTTTATTTGTTTGAGCAGTTAAATTTACAGCAATCTTACTACTTTTATCATTACCTGTCTTAGCAGGAGCCATCACAATACTCCTAACTGATCGAAATTTAAATACATCATTTTTTGACCCCGCCGGAGGAGGAGACCCAATTTTATACCAACATCTTTTC
>PSFOR151-13|BC-PNEF-PSFOR0123|Pogonocherus hispidulus|COI-5P
TACTCTATACTTTTTATTCGGCTCCTGAGCTGGAATAGTTGGAACTTCCTTAAGACTCTTAATTCGCTCTGAATTAGGAAATCCTGGATCCCTCATTGGTGATGACCAAATTTATAATGTTATTGTAACAGCTCACGCATTTGTGATAATTTTTTTTATAGTTATGCCCATTATAATTGGAGGATTTGGAAATTGACTAGTACCATTAATACTTGGAGCTCCAGATATAGCATTCCCACGAATAAACAACATAAGATTTTGATTGTTACCACCTTCATTAACTCTTTTAATCATAAGAAGAATCACTGAAAACGGTGCAGGAACAGGATGAACAGTTTACCCACCACTATCAGCCAATATTGCTCACAGCGGTTCTTCTGTAGATCTAGCCATCTTTAGGCTCCACTTAGCTGGAATCTCCTCCATTCTTGGTGCTGTAAACTTCATTACTACAGTAATCAATATACGTCCAATGGGTATAATTTTTGAACGACTACCACTCTTTGTATGATCAGTAAAAATCACTGCAATCCTATTACTTCTTTCTCTTCCAGTGCTAGCTGGAGCAATCACTATACTCCTTACTGATCGAAACTTAAACACCTCATTTTTTGATCCAGCAGGAGGTGGTGACCCAATTCTTTATCAACACCTATTT
>PSFOR483-13|BC-PASSIFOR0056|Pogonocherus hispidulus|COI-5P
TACTCTATACTTTTTATTCGGCTCCTGAGCTGGAATAGTTGGAACTTCCTTAAGACTCTTAATTCGCTCTGAATTAGGAAATCCTGGATCCCTCATTGGTGATGACCAAATTTATAATGTTATTGTAACAGCTCACGCATTTGTGATAATTTTTTTTATAGTTATGCCCATTATAATTGGAGGATTTGGAAATTGACTAGTACCATTAATACTTGGAGCTCCAGATATAGCATTCCCACGAATAAACAACATAAGATTTTGATTGTTACCACCTTCATTAACTCTTTTAATCATAAGAAGAATCACTGAAAACGGTGCAGGAACAGGATGAACAGTTTACCCACCACTATCAGCCAATATTGCTCACAGCGGTTCTTCTGTAGATCTAGCCATCTTTAGGCTCCATTTAGCTGGAATCTCCTCCATTCTTGGTGCTGTAAACTTCATTACGACAGTAATCAATATACGTCCAATGGGTATAATTTTTGAACGACTACCACTCTTTGTATGATCAGTAAAAATCACTGCAATCCTATTACTTCTTTCTCTTCCAGTGCTAGCTGGAGCAATCACTATACTCCTTACTGATCGAAACTTAAACACCTCATTTTTTGATCCAGCAGGAGGTGGTGACCCAATTCTTTATCAACACCTATTT
>PSFOR986-14|PASSIFOR-NM13-006|Pogonocherus hispidulus|COI-5P
TACTCTATACTTTTTATTCGGCTCCTGAGCTGGAATAGTTGGAACTTCCTTAAGACTCTTAATTCGCTCTGAATTAGGAAATCCTGGATCCCTCATTGGTGATGACCAAATTTATAATGTTATTGTAACAGCTCACGCATTTGTGATAATTTTTTTTATAGTTATGCCCATTATAATTGGAGGATTTGGAAATTGACTAGTACCATTAATACTTGGAGCTCCAGATATAGCATTCCCACGAATAAACAACATAAGATTTTGATTGTTACCACCTTCATTAACTCTTTTAATCATAAGAAGAATCACTGAAAACGGTGCAGGAACAGGATGAACAGTTTACCCACCACTATCAGCCAATATTGCTCACAGCGGTTCTTCTGTAGATCTAGCCATCTTTAGGCTCCACTTAGCTGGAATCTCCTCCATTCTTGGTGCTGTAAACTTCATTACTACAGTAATCAATATACGTCCAATGGGTATAATTTTTGAACGACTACCACTCTTTGTATGATCAGTAAAAATCACTGCAATCCTATTACTTCTTTCTCTTCCAGTGCTAGCTGGAGCAATCACTATACTCCTTACTGATCGAAACTTAAACACCTCATTTTTTGATCCAGCAGGAGGTGGTGACCCAATTCTTTATCAACACCTATTT
>PSFOR153-13|BC-PNEF-PSFOR0125|Pogonocherus ovatus|COI-5P
AACTCTATATTTTCTTTTTGGTGCTTGAGCAGGAATAGTTGGTACTTCTCTAAGTCTTTTAATTCGCTCTGAGCTTGGTAATCCTGGATCTTTAATTGGTGACGATCAAATTTATAATGTTATTGTTACAGCTCATGCTTTTGTCATAATTTTTTTTATAGTAATACCTATCATAATTGGAGGCTTTGGAAATTGATTAGTTCCATTAATATTAGGAGCTCCAGATATAGCATTTCCACGAATGAATAATATAAGATTTTGACTTCTCCCTCCATCCTTAAGTCTCTTAATCATAAGAAGAATTACTGAAAATGGAGCAGGAACCGGATGAACTGTATATCCACCTTTATCCTCTAATATTGCTCATAGGGGATCTTCTGTTGATCTTGCTATTTTTAGACTCCATTTAGCTGGGATTTCATCTATTCTAGGAGCAGTAAATTTTATTACAACTGTTATTAATATACGTCCTGCAGGTATAATCTTTGAACGCTTACCATTATTTGTTTGAGCTGTTAAAATCACAGCTATCCTATTACTTTTATCTTTACCAGTTTTAGCTGGAGCAATCACTATACTCCTTACAGATCGAAACTTAAATACTTCTTTTTTTGATCCCGCTGGAGGTGGAGATCCCATTTTATATCAACATTTATTT
>PSFOR712-13|BC-PNEF-PSFOR0589|Polygraphus grandiclava|COI-5P
--------------------------GATCAGGAATAGTAGGAACCTCTCTTAGAATAATTATCCGAACAGAACTTGGAACCCCCGGAAGATTAATTGGAAATGATCAAATCTATAATACTATTGTAACTGCTCATGCATTTATTATAATTTTTTTTATAGTAATACCAGTATTAATTGGAGGGTTCGGAAATTGATTAGTACCATTAATATTAGGAGCCCCTGATATAGCATTTCCTCGTCTTAATAATATAAGATTTTGACTTTTGCCCCCTTCTTTAACCCTTCTTTTAATAAGAAGAATTACT---------------------------------------------------------------------------------------------------------------------------------------------------------------------------------------------------------------------------------------------------------------------------------------------------------------------------------------------------------------
>PSFOR078-13|BC-PNEF-PSFOR0050|Prinobius myardi|COI-5P
------CTACTTTGTGTTTGGAGCATGAGCAAGAATAGTTGGTACATCCCTAAGAGTCTTAATTCGATCAGAGTTAGGAACCCCAGGTTCCTTAATTGGAGATGATCAAATCTATAACGTAATTGTTACAGCTCACGCATTTGTAATAATTTTCTTTATAGTTATACCGATTATGATTGGAGGATTCGGAAATTGGCTAGTACCCTTAATATTGGGAGCTCCCGACATAGCTTTTCCACGAATAAATAATATAAGATTCTGACTTTTACCCCCGTCACTTTCACTTTTAATCATAAGAAGAATTGTAGAAAGAGGAGCTGGGACTGGATGAACAGTATACCCCCCATTAGCCGCTAACATTGCCCACAGAGGCTCCTCAGTTGATTTAGCAATTTTTAGTTTACATTTAGCTGGAATCTCCTCAATTCTTGGAGCTGTAAACTTTATTTCAACCGTAATTAATATACGACCAGAAGGACTAAGATCAGAACGAATACCCCTATTTGTTTGGTCAGTAGTAATTACAGCTATTCTTCTTTTATTATCTTTGCCTGTCCTGGCTGGAGCAATCACCATGCTACTGACAGACCGAAATTTAAATACATCTTTTTTTGACCCCGCAGGAGGAGGAGACCCAATCTTATACCAACACCTA---
>PSFOR079-13|BC-PNEF-PSFOR0051|Prionus coriarius|COI-5P
AACCCTTTACTTCATTTTTGGGGCCTGAGCAAGAATGGTGGGAACATCTATAAGAGTTCTTATTCGATCCGAATTAGGAAACCCAGGATCTCTTATTGGAGATGACCAAATTTACAATGTAATTGTAACGGCACATGCATTTATTATAATCTTCTTCATAGTTATACCAATTATAATTGGTGGATTCGGTAATTGATTAGTCCCATTAATACTAGGCGCCCCAGACATAGCCTTCCCCCGAATAAATAATATAAGATTCTGATTATTACCCCCCTCATTAACTCTTCTCGTAATAAGAAGAATTGTAGAAAGAGGAGCTGGAACCGGATGAACTGTTTATCCTCCTTTATCTGCTAATGTAGCTCATAGAGGTTCCTCTGTTGATCTAGCAATTTTTAGTCTTCACTTAGCAGGAGTATCATCAATTCTAGGAGCTGCTAATTTTATCACCACAGTAATTAACATACGACCGTTTGGTATAACCCCAGATCGCCTCCCCCTATTTGTATGAGCAGTAGTTATTACTGCTATTTTATTATTGTTATCCCTTCCCGTTTTAGCAGGAGCCATCACAATACTCCTAACTGACCGAAATTTAAATACTTCATTTTTCGACCCAGCAGGAGGTGGAGATCCAATTCTTTACCAACATCTATTC
>PSFOR759-13|BC-PNEF-PSFOR0636|Procraerus tibialis|COI-5P
AACTTTATATTTCATTTTTGGTGCTTGAGCAGGAATGCTAGGAACATCACTTAGACTTTTGATTCGTGCTGAACTGGGGAATCCGGGAGCATTAATTGGAAACGACCAAATTTATAATGTTGTTGTAACAGCACATGCCTTTATCATAATCTTCTTTATAGTGATACCCATCATAATTGGAGGATTCGGAAACTGATTAGTCCCCCTAATATTAGGAGCTCCAGACATAGCATTTCCTCGAATAAACAATATAAGATTCTGGCTTCTTCCCCCCTCTCTTTCTCTCCTTTTAATGAGAAGTATTGTTGAAAGAGGAGCAGGAACTGGATGGACAGTTTACCCACCTTTAGCAGCTAATATTGCCCACAGAGGATCATCTGTAGACTTAGCAATTTTTAGTCTTCATCTAGCAGGAATCTCATCAATTCTAGGCGCTGTAAATTTTATTTCAACAGTTATTAATATACGTTCAACAGGAATCTCCTTTGACCGTATACCTCTATTTGTATGGGCTGTAGCAATCACAGCTCTACTCCTCCTCTTATCCCTCCCTGTTTTAGCTGGGGCCATCACTATACTTTTAACAGATCGAAATCTAAACACATCATTCTTTGACCCTGCCGGTGGGGGAGACCCAATTCTTTACCAGCACCTATTC
>PSFOR386-13|BC-PNEF-PSFOR0358|Prostomis mandibularis|COI-5P
GACCTTATACTTAGTTTTTGGTGCTTGGGCAGGAATAGTAGGAACATCTCTTAGTCTATTAATCCGATCTGAACTAGGCAACCCCGGATCGTTAATTGGAAATGACCAAATTTACAATGTTATCGTAACTGCCCATGCATTTGTAATAATTTTTTTCATAGTTATACCCATTATAATTGGTGGCTTCGGAAATTGGTTAGTTCCTCTAATATTAGGAGCCCCTGATATAGCCTTTCCTCGTATAAACAACATAAGATTCTGACTTCTTCCACCTTCTTTAACTCTTCTAATTATAAGAAGAATCGTAGAAAATGGCGCAGGAACAGGATGAACTGTTTATCCCCCCCTCTCTTCTAATATTGCTCACAACGGATCTTCTGTCGATTTAGCTATTTTCAGGCTTCATTTAGCAGGAATTTCATCTATTTTAGGAGCAGTAAATTTTATTACCACAGTAATCAATATACGACCTGTAGGAATAAATCTAGATCAAATACCACTCTTTGTTTGAGCAGTTACAATTACAGCAATTCTCCTTCTCCTTTCCTTACCAATCCTAGCAGGAGCTATTACTATGCTTCTAACAGACCGAAACCTAAATACCACCTTCTTTGACCCAGCAGGAGGTGGAGACCCTATTCTATATCAACACCTATTT
>PSFOR242-13|BC-PNEF-PSFOR0214|Protaetia aeruginosa|COI-5P
GACGTTGTATTTTTTATTTGGAAGATGAGCTGGAATAGTAGGAACCTCCCTTAGTCTACTAATCCGGGCCGAACTCGGGAATCCCGGTTCTTTAATTGGTGATGACCAAATTTATAACGTTATCGTAACAGCTCATGCTTTCATCATAATTTTTTTCATAGTAATACCGATTATAATTGGTGGATTTGGAAATTGACTTGTCCCCTTAATGCTTGGAGCTCCCGACATAGCTTTTCCTCGAATAAATAACATAAGTTTCTGACTTCTCCCCCCTTCACTAACATTACTTCTGATAAGAAGAATGGTTGAAAGAGGAGCAGGAACCGGATGAACAGTCTACCCACCCTTATCTAGAAATATCGCTCATAGAGGAGCTTCAGTTGACTTAGCTATTTTTAGATTACACCTAGCTGGAATCTCATCAATCTTAGGTGCTGTAAATTTTATTACAACTGTGATTAACATACGATCAACAGGAATAACATTCGATCGAATACCATTATTTGTTTGATCTGTAGCTCTTACAGCTCTTTTATTACTTTTATCACTACCTGTATTAGCCGGGGCAATTACAATACTTTTAACTGACCGAAATATCAATACTTCATTTTTTGACCCAGCTGGAGGAGGTGACCCAATTCTTTACCAACATTTATTT
>PSFOR243-13|BC-PNEF-PSFOR0215|Protaetia affinis|COI-5P
AACGTTGTATTTTTTATTCGGAAGATGAGCTGGAATAGTAGGAACCTCCCTTAGTCTACTAATTCGAGCTGAACTTGGAAACCCCGGTTCTTTAATTGGTGATGATCAAATTTATAATGTCATCGTAACAGCCCATGCTTTCATTATAATTTTCTTCATAGTAATACCGATTATAATTGGTGGATTTGGAAATTGGCTTGTCCCTTTAATGCTAGGAGCTCCCGACATAGCTTTCCCCCGAATAAATAACATAAGCTTCTGATTACTCCCGCCTTCACTGACATTGCTTTTGATAAGAAGATTAGTTGAAAGAGGTGCAGGAACCGGATGAACAGTTTACCCACCTTTATCTAGAAATATTGCTCACAGAGGAGCTTCAGTTGATTTAGCTATTTTCAGATTGCACTTAGCGGGAATTTCATCAATCTTAGGTGCTGTAAATTTTATTACAACTGTAATTAATATACGATCAACTGGAATAACATTTGATCGAATACCCTTATTCGTTTGATCAGTAGCTCTAACAGCTCTCCTTCTACTCTTATCTCTGCCTGTACTAGCTGGAGCAATCACAATACTACTTACAGATCGAAATATCAATACTTCATTTTTTGACCCTGCAGGGGGAGGAGACCCCATTCTCTACCAGCACTTATTT
>PSFOR250-13|BC-PNEF-PSFOR0222|Protaetia cuprea|COI-5P
AACGTTATATTTTTTATTCGGAAGATGAGCTGGAATAGTAGGAACATCCCTTAGTTTACTAATTCGAGCTGAACTTGGAAACCCTGGATCTTTAATTGGTGATGATCAAATTTATAATGTTATTGTAACGGCCCACGCTTTCATTATAATTTTTTTCATAGTAATACCAATTATAATTGGTGGATTTGGAAATTGACTTGTCCCATTAATACTGGGTGCTCCAGATATAGCATTCCCCCGAATAAACAACATAAGATTTTGATTACTACCACCTTCACTAACATTACTTTTAATAAGTAGAGTAGTTGAAAGAGGGGCTGGAACTGGATGAACAGTGTACCCTCCCTTATCTAGTAATATTGCTCATAGAGGTGCCTCAGTAGACTTAGCTATTTTTAGTTTACATTTAGCTGGAATCTCATCAATTTTAGGTGCTGTAAATTTCATTACAACTGTAATTAATATACGATCAACTGGTATAACATTCGATCGAATACCTTTATTTGTATGATCAGTTGCATTAACTGCTTTACTTCTGCTACTATCACTACCTGTCTTAGCTGGGGCAATTACAATACTTTTAACTGATCGAAACATCAATACTTCATTTTTTGACCCCGCTGGAGGTGGTGACCCCATTTTATACCAACACCTCTTT
>PSFOR249-13|BC-PNEF-PSFOR0221|Protaetia cuprea metallica|COI-5P
AACGTTATATTTTTTATTCGGAAGATGAGCTGGAATAGTAGGAACATCCCTTAGTTTACTAATTCGAGCTGAACTCGGAAACCCTGGATCTTTAATTGGTGACGATCAAATTTATAATGTTATTGTAACGGCCCACGCTTTCATTATAATTTTTTTCATAGTAATACCGATTATAATTGGTGGATTTGGAAATTGACTTGTCCCATTAATACTAGGTGCTCCAGATATAGCATTTCCCCGAATAAATAACATAAGATTTTGATTACTACCACCTTCACTAACATTACTTTTAATAAGTAGAGTAGTTGAAAGAGGGGCTGGAACTGGATGAACAGTGTACCCTCCCTTATCTAGTAATATTGCTCATAGAGGTGCCTCAGTAGACTTAGCTATTTTTAGTTTACATTTAGCTGGAATCTCATCAATTTTAGGTGCTGTAAATTTCATTACAACTGTAATTAATATACGATCAACTGGTATAACATTCGATCGAATACCTTTATTTGTATGATCAGTTGCATTAACTGCTTTACTTCTGCTACTATCACTACCTGTCTTAGCTGGAGCAATTACAATACTTTTAACTGATCGAAACATCAATACTTCATTTTTTGACCCCGCTGGAGGTGGTGACCCCATTTTATACCAACACCTATTT
>PSFOR251-13|BC-PNEF-PSFOR0223|Protaetia fieberi|COI-5P
AACGTTGTATTTTTTATTTGGAAGATGAGCTGGAATAGTAGGAACATCCCTTAGTTTACTAATTCGAGCTGAACTTGGAAATCCAGGTTCCTTAATTGGAGATGATCAAATTTATAATGTTATTGTAACGGCCCATGCTTTCATTATGATTTTTTTCATAGTAATACCAATTATAATTGGTGGATTCGGAAATTGACTTGTTCCATTAATGCTAGGTGCCCCAGACATAGCATTTCCCCGAATAAACAACATAAGATTCTGACTACTGCCACCTTCACTAACATTACTTTTAATGAGTAGAGTAGTTGAAAGAGGAGCTGGTACTGGATGAACAGTCTATCCCCCCTTATCCAGTAATATTGCTCATAGCGGAGCTTCAGTAGATCTAGCTATTTTTAGTTTACACTTAGCAGGAATTTCCTCAATTCTTGGTGCTGTAAATTTTATTACAACTGTAATTAACATACGATCAACTGGAATAACATTCGATCGAATACCTTTGTTTGTCTGATCAGTTGCATTAACTGCTCTTCTCCTTCTCCTATCTCTTCCTGTCTTAGCTGGAGCAATCACAATACTTTTAACTGATCGAAATATTAATACTTCATTTTTTGACCCGGCTGGAGGTGGTGATCCTATTCTATATCAACATCTATTC
>PSFOR244-13|BC-PNEF-PSFOR0216|Protaetia lugubris|COI-5P
AACGTTGTACTTTTTATTTGGAAGATGAGCTGGTATAGTAGGAACCTCCCTAAGCCTACTAATTCGAGCTGAACTTGGAAATCCCGGTTCTTTAATTGGTGATGATCAAATTTATAATGTCATTGTAACAGCCCATGCTTTCATTATGATTTTTTTCATGGTAATACCAGTAATAATTGGTGGATTTGGAAATTGACTTGTCCCTTTAATACTAGGAGCTCCCGACATAGCTTTTCCCCGAATAAACAACATAAGTTTCTGACTTCTGCCCCCGTCTCTAACATTGCTTTTGATAAGAAGAATGGTTGAAAGAGGAGCAGGAACCGGATGAACTGTTTATCCTCCCCTATCTAGAAACATCGCTCATAGAGGAGCCTCAGTTGACTTAGCTATTTTCAGATTACATCTAGCAGGAATCTCATCAATCCTAGGTGCTGTAAATTTCATTACTACTGTAATTAACATACGATCAACTGGTATAACATTTGATCGAATACCGCTATTTGTTTGATCAGTGGTCCTTACTGCCCTTTTACTGCTCCTGTCACTTCCAGTATTAGCTGGAGCAATCACAATACTTTTAACTGATCGAAATATTAATACTTCATTTTTCGACCCGGCCGGAGGAGGTGACCCAATTCTTTACCAACACTTATTT
>PSFOR245-13|BC-PNEF-PSFOR0217|Protaetia morio|COI-5P
AACGTTGTATTTTTTATTTGGAAGATGAGCTGGAATAGTAGGAACATCCCTTAGTTTACTAATTCGAGCTGAACTTGGTAATCCTGGTTCTTTAATCGGTGATGATCAAATTTACAATGTTATTGTAACAGCTCATGCTTTCATCATAATTTTTTTCATGGTAATACCAATTATAATTGGTGGATTCGGAAATTGACTTGTTCCATTAATGCTAGGTGCCCCCGACATAGCATTTCCCCGAATAAACAACATAAGATTCTGACTATTACCACCCTCACTAACATTACTTTTAATAAGTAGAGTAGTTGAAAGAGGAGCTGGCACTGGATGAACAGTTTATCCCCCCTTATCTAGTAACATTGCTCATAGTGGTGCTTCAGTAGACTTAGCTATTTTTAGTTTACACTTAGCAGGAATTTCATCAATCCTTGGTGCTGTAAATTTTATTACAACTGTGATTAACATACGATCAACTGGAATAACATTTGATCGAATACCTTTATTTGTTTGATCAGTTGCATTAACTGCTTTATTACTTCTCCTATCTCTTCCTGTTTTAGCAGGAGCAATTACAATACTTTTAACCGATCGAAATATCAATACTTCATTTTTTGATCCAGCTGGTGGTGGTGACCCAATCTTATACCAACATCTATTC
>PSFOR252-13|BC-PNEF-PSFOR0224|Protaetia oblonga|COI-5P
AACGTTGTATTTTTTATTCGGAAGATGAGCTGGAATAGTAGGAACATCCCTTAGTTTACTTATTCGAGCTGAACTTGGTAGTCCTGGCTCTTTAATTGGAGATGACCAGATTTATAATGTTATCGTAACAGCCCATGCTTTCATTATAATTTTTTTCATAGTTATACCGATTATAATCGGTGGATTTGGAAATTGACTTGTCCCTTTAATGCTAGGAGCCCCAGATATAGCATTTCCTCGAATAAACAACATAAGATTCTGATTACTACCACCTTCATTAACATTACTTTTAATGAGTAGAGTGATTGAAAGAGGCGCAGGTACTGGATGAACAGTTTATCCCCCTTTATCTAGAAATATTGCTCATAGTGGTGCTTCAGTAGATCTAGCTATTTTTAGTTTACATTTAGCAGGAATTTCTTCAATTCTTGGTGCTGTAAATTTTATTACAACTGTGATCAACATACGATCAACTGGAATAACATTTGATCGAATACCTTTATTTGTTTGATCAGTTGCATTAACTGCCTTACTTCTTTTATTATCACTTCCTGTCTTAGCTGGAGCAATCACTATACTTTTAACAGATCGAAATATTAATACTTCATTTTTTGACCCCGCTGGAGGCGGTGATCCTATTTTATACCAGCATCTATTC
>PSFOR246-13|BC-PNEF-PSFOR0218|Protaetia opaca|COI-5P
AACGTTGTACTTTTTATTCGGAAGATGAGCTGGAATAGTAGGAACCTCCCTTAGTTTACTAATTCGAGCTGAACTTGGTAACCCCGGTTCTTTAATTGGGGATGATCAAATTTATAATGTCATTGTAACCGCCCATGCTTTCATTATAATTTTTTTCATAGTTATACCAATTATAATTGGTGGATTCGGAAATTGACTTGTCCCTTTAATACTAGGTGCCCCAGATATAGCATTCCCCCGAATAAACAACATAAGATTCTGACTATTACCACCTTCATTAACATTGCTTTTAATGAGTAGAGTAGTAGAGAGAGGCGCTGGTACTGGATGAACAGTTTATCCCCCCTTATCTAGAAATATTGCTCATAGTGGTGCTTCAGTCGATTTAGCTATTTTTAGTTTACACCTTGCAGGAATCTCCTCAATTCTTGGCGCTGTAAATTTCATTACAACTGTTATTAATATACGATCAACTGGAATAACATTTGACCGAATACCTTTATTCGTTTGATCAGTTGCATTAACAGCTCTGCTACTTCTCCTTTCACTTCCTGTTTTAGCTGGAGCAATTACAATACTTTTAACTGACCGAAATATCAATACTTCATTTTTTGACCCAGCAGGGGGAGGAGACCCGATTTTATACCAACACTTATTT
>PSFOR1069-14|PASSIFOR-NM13-089|Pseudocistela ceramboides|COI-5P
AACACTTTATTTTATCTTTGGAGCTTGAGCAGGAATAGTAGGAACATCTCTAAGATTATTGATTCGAGCAGAACTAGGAAACCCTGGATCGCTTATTGGTGACGACCAAATTTACAACGTAATCGTTACTGCCCATGCATTTATCATAATTTTCTTCATAGTAATACCAATTATAATTGGAGGATTTGGAAATTGATTAGTTCCATTAATATTGGGAGCCCCAGATATAGCATTCCCTCGAATAAATAATATAAGATTCTGACTTTTACCTCCTTCACTTACGCTCCTTCTTATAAGAAGAGTAGTAGAAAATGGGGCAGGAACAGGATGAACAGTTTATCCCCCCCTATCATCAAATATTGCCCATGGAGGAGCATCAGTAGATTTAGCAATTTTCAGACTACATTTAGCAGGAATTTCATCAATTTTAGGAGCAGTAAATTTTATCACCACAGTTATTAATATACGACCTCAAGGAATAAGATTCGATCGAATACCTTTATTTGTATGAGCAGTAGTAATCACAGCAGTTCTTCTTCTTCTATCACTTCCTGTTCTTGCAGGAGCAATTACTATGTTATTAACTGACCGAAATATTAACACATCATTTTTTGATCCAGCGGGAGGTGGAGATCCTATCTTATACCAACACTTATTC
>PSFOR199-13|BC-PNEF-PSFOR0171|Pseudocistela ceramboides|COI-5P
AACACTTTATTTTATCTTTGGAGCTTGAGCAGGAATAGTAGGAACATCTCTAAGATTATTGATTCGAGCAGAACTAGGAAACCCTGGATCGCTTATTGGTGACGACCAAATTTACAACGTAATCGTTACTGCTCATGCATTTATCATAATTTTCTTCATAGTAATACCAATTATAATTGGAGGATTTGGAAATTGATTAGTTCCATTAATATTGGGAGCCCCAGATATAGCATTCCCTCGAATAAATAATATAAGATTCTGACTTTTACCTCCTTCACTTACGCTCCTTCTTATAAGAAGAGTAGTAGAAAATGGGGCAGGAACAGGATGAACAGTTTATCCCCCCCTATCATCAAATATTGCCCATGGAGGAGCATCAGTAGATTTAGCAATTTTCAGACTACATTTAGCAGGAATTTCATCAATTTTAGGAGCAGTAAATTTTATCACCACAGTTATTAATATACGACCTCAAGGAATAAGATTCGATCGAATACCTTTATTTGTATGAGCAGTAGTAATCACAGCAGTTCTTCTTCTTCTATCACTTCCTGTTCTTGCAGGAGCAATTACTATGTTATTAACTGACCGAAATATTAACACATCATTTTTTGATCCAGCGGGAGGTGGAGATCCTATCTTATACCAACACTTATTC
>PSFOR398-13|BC-PNEF-PSFOR0370|Pseudocistela ceramboides|COI-5P
AACACTTTATTTTATCTTTGGAGCTTGAGCAGGAATAGTAGGAACATCTCTAAGATTATTGATTCGAGCAGAACTAGGAAACCCTGGATCGCTTATTGGTGACGACCAAATTTACAACGTAATCGTTACTGCCCATGCATTTATCATAATTTTCTTCATAGTAATACCAATTATAATTGGAGGATTTGGAAATTGATTAGTTCCATTAATATTGGGAGCCCCAGATATAGCATTCCCTCGAATAAATAATATAAGATTCTGACTTTTACCTCCTTCACTTACGCTCCTTCTTATAAGAAGAGTAGTAGAAAATGGGGCAGGAACAGGATGAACAGTTTATCCCCCCTTATCATCAAATATTGCCCATGGAGGAGCATCAGTAGATTTAGCAATTTTCAGACTACATTTAGCAGGAATTTCATCAATTTTAGGAGCAGTAAATTTTATCACCACAGTTATTAATATACGACCTCAAGGAATAAGATTCGATCGAATACCTTTATTTGTATGAGCAGTAGTAATCACAGCAGTTCTTCTTCTTCTATCACTTCCTGTTCTTGCAGGAGCAATTACTATGTTATTAACTGACCGAAATATTAACACATCATTTTTTGATCCAGCGGGAGGTGGAGATCCTATCTTATACCAACACTTATTC
>PSFOR154-13|BC-PNEF-PSFOR0126|Pseudovadonia livida|COI-5P
AACTTTATATTTTATTTTCGGAGCTTGGGCGAGAATAGTTGGAACATCCTTAAGACTTTTAATTCGATCAGAATTAGGTAACCCAGGAAGTTTAATTGGGGATGATCAAATTTATAATGTAATTGTAACAGCTCATGCATTTGTTATAATTTTTTTTATGGTTATACCAATTATAATCGGCGGATTCGGTAATTGATTAGTCCCATTAATGCTGGGTGCTCCTGATATAGCTTTCCCTCGAATAAATAACATAAGATTTTGATTATTACCTCCATCCTTAACATTATTAATTATGAGAAGAATTGTAGAAAATGGAGCAGGAACAGGTTGAACAGTTTATCCTCCTTTATCTGCAAATATTGCTCATAGAGGATCTTCTGTTGATTTAGCTATTTTTAGTTTACATTTAGCTGGTATTTCATCAATTTTAGGGGCAGTAAACTTTATCACTACAGTTATCAATATACGACCTAAAGGAATAAACCTAGATCAAATACCTCTCTTTGTCTGGGCTGTTGTAATTACTGCTATCCTTTTACTTCTATCTCTACCTGTTTTAGCAGGAGCAATTACTATATTACTAACCGACCGTAATTTAAATACATCCTTTTTTGATCCAGCAGGAGGAGGAGACCCAATTTTATACCAACATTTATTT
>PSFOR989-14|PASSIFOR-NM13-009|Pseudovadonia livida|COI-5P
AACTTTATATTTTATTTTCGGAGCTTGGGCGAGAATAGTTGGAACATCCTTAAGACTTTTAATTCGATCAGAATTAGGTAACCCGGGAAGTTTAATTGGAGATGATCAAATTTATAATGTAATTGTAACAGCTCATGCATTTGTTATAATTTTTTTTATGGTTATACCAATTATAATTGGTGGATTCGGTAATTGATTGGTCCCATTAATACTAGGGGCTCCTGATATAGCTTTCCCTCGAATAAATAACATAAGATTTTGATTATTACCTCCATCCTTAACATTATTAATTATGAGAAGAGTTGTAGAAAATGGGGCAGGAACAGGTTGAACAGTTTATCCTCCTTTATCTGCAAATATTGCTCATAGCGGATCTTCTGTCGATTTAGCTATTTTTAGTTTACATTTAGCTGGTATTTCATCGATTTTGGGAGCAGTAAACTTTATCACTACAGTTATCAATATGCGACCTAAAGGAATAAACCTAGATCAAATACCTCTCTTTGTTTGAGCCGTTGTAATTACTGCTATCCTTTTACTTCTATCCTTACCTGTTTTAGCAGGAGCAATTACTATATTATTAACCGACCGTAATTTAAATACATCCTTTTTTGATCCGGCAGGAGGGGGAGACCCAATTTTATACCAACATTTATTT
>PSFOR679-13|BC-PNEF-PSFOR0556|Ptilinus fuscus|COI-5P
AACTTTATATTTCATTTTCGGATCATGATCAGGTATAATTGGAACATCTTTAAGATTATTAATTCGATCAGAACTCGGTAATCCTGGGGCTTTAATTGGAAATGATCAAATTTATAATGTTATCGTAACAGCTCATGCATTTATTATAATTTTTTTTATAGTTATACCTATAATAATTGGGGGGTTTGGAAACTGATTAGTACCTTTAATATTGGGGGCACCTGATATAGCATTCCCTCGAATAAATAATATAAGATTTTGGTTATTACCCCCATCACTATCACTTTTATTAATAAGAATAATCGTAAATAGGGGAACAGGAACAGGATGAACTGTTTACCCCCCTTTATCCTCAAATATTGCTCATAGAGGAGCATCGGTAGATCTAACAATTTTTAGTCTCCATCTTGCAGGAATTTCCTCTATTTTGGGAGCTATCAATTTCATTACAACAGTAATTAACATACGACCCATAAGAATAACATTTGATCGAATACCACTATTCGTTTGATCCGTAGTAATCACTGCTCTTTTATTATTATTATCATTACCCGTACTAGCAGGTGCTATTACAATATTATTAACTGATCGAAATTTAAACACATCTTTCTTTGATCCTGCTGGGGGTGGAGATCCAATTTTATACCAACACTTATTT
>PSFOR914-14|BC-PASSIFOR0133|Ptilinus pectinicornis|COI-5P
TACTTTATATTTTATCTTTGGAGCGTGATCAGGAATAATTGGTACATCTTTAAGAATATTAATTCGATCAGAACTTGGTAATCCTAGGGCTTTAATTGGAGATGATCAAATTTATAATGTTATTGTAACAGCTCATGCATTTATTATAATTTTTTTTATAGTTATACCTGTTATAATTGGAGGATTTGGAAATTGATTAGTTCCATTAATACTTGGGGCACCTGATATAGCATTCCCTCGAATAAATAATATAAGATTTTGATTGCTTCCCCCATCATTATCTCTTTTATTAATAAGAAGAATTGTAAATAGTGGCGCTGGAACAGGTTGAACTGTCTATCCTCCTCTATCATCAAATATTGCCCATAGAGGAGCATCAGTAGATTTAACAATTTTTAGTCTTCACTTAGCAGGAATTTCATCTATTTTAGGAGCTATTAATTTTATTACAACAGTGATTAATATACGACCTACAGAAATAATATTTGATCGAATACCTTTATTTGTATGATCAGTAGCAATCACTGCTCTTCTATTACTATTATCATTACCAGTATTAGCAGGTGCTATTACAATATTATTAACTGATCGAAACTTAAATACATCATTTTTTGATCCTGCTGGAGGAGGAGATCCTATTTTATATCAACATTTATTT
>PSFOR382-13|BC-PNEF-PSFOR0354|Ptilinus pectinicornis|COI-5P
----------------------------------ATAATTGGTACATCTTTAAGAATATTAATTCGATCAGAACTTGGTAATCCTAGGGCTTTAATTGGAGATGATCAAATTTATAATGTTATTGTAACAGCTCATGCATTTATTATAATTTTTTTTATAGTTATACCTGTTATAATTGGAGGATTTGGAAATTGATTAGTTCCATTAATACTTGGGGCACCTGATATAGCATTCCCTCGAATAAATAATATAAGATTTTGATTGCTTCCCCCATCATTATCTCTTTTATTAATAAGAAGAATTGTAAATAGTGGCGCTGGAACAGGTTGAACTGTCTATCCTCCTCTATCATCAAATATTGCCCATAGAGGAGCATCAGTAGATTTAACAATTTTTAGTCTTCACTTAGCAGGAATTTCATCTATTTTAGGAGCTATTAATTTTATTACAACAGTGATTAATATACGACCTACAGAAATAATATTTGATCGAATACCTTTATTTGTATGATCAGTAGCAATCACTGCTCTTCTATTACTATTATCATTACCAGTATTAGCAGGTGCTATTACAATATTATTAACTGATCGAAACTTAAATACATCATTTTTTGATCCTGCTGGAGGAGGAGATCCTATTTTATATCAACATTTATTT
>PSFOR383-13|BC-PNEF-PSFOR0355|Ptilinus pectinicornis|COI-5P
TACTTTATATTTTNTCTTCGGAGCGTGATCAGGAATAATTGGTACATCTTTAAGAATATTAATTCGATCAGAACTTGGTAATCCTAGGGCTTTAATTGGAGATGATCAAATTTATAATGTTATTGTAACAGCTCATGCATTTATTATAATTTTTTTTATAGTTATNCCTGTTATAATTGGAGGATTTGGAAATTGATTAGTTCCATTAATACTTGGGGCACCTGATATAGCATTCCCTCGAATAAATAATATAAGATTTTGATTGCTTCCCCCATCATTATCTCTTTTATTAATAAGAAGAATTGTAAATAGTGGCGCTGGAACAGGTTGAACTGTCTATCCTCCTCTATCATCAAATATTGCCCATAGAGGAGCATCAGTAGATTTAACAATTTTTAGTCTTCACTTAGCAGGAATTTCATCTATTTTAGGAGCTATTAATTTTATTACAACAGTGATTAATATNCGACCTACAGAAATAATATTTGATCGAATACCTTTATTTGTATGATCAGTAGCAATCACTGCTCTTCTATTACTATTATCATTACCAGTATTAGCAGGTGCTATTACAATATTATTAACTGATCGAAACTTAAATACATCATTTT-----------------------------------------------
>PSFOR488-13|BC-PASSIFOR0061|Ptinomorphus imperialis|COI-5P
-----------------------------------------------------------------------------------------------------------------------------------------------------------------------------------------------------------------------------------------------------------TAAGATTTTGACTTTTACCCCCATCCCTTTCTCTTCTCTTAGCAAGAAGAATCGTTGAAAACGGAGCCGGAACGGGGTGAACTGTATACCCCCCATTAGCATCTAATATCGCCCATAGTGGTGCTTCTGTAGATCTAGCAATTTTTAGTCTTCACTTAGCTGGAGTTTCGTCAATTCTAGGAGCAGTGAACTTTATTACTACAGTAATTAATATACGACCTGTTGGAATACTTTTTGATAGAATGCCTCTTTTTGTCTGGTCCGTAGCAATTACTGCTTTATTACTTTTACTATCACTACCTGTTTTGGCCGGGGCCATCACAATATTATTAACAGATCGAAATTTAAATACATCATTTTTTGACCCTGCTGGAG--------------------------------
>PSFOR680-13|BC-PNEF-PSFOR0557|Ptinomorphus regalis|COI-5P
-----------------------------------------------------------------------------------------------------------------------------------------------------------------------------------------------------------------------------------------------------------TAAGATTTTGACTTCTACCCCCTTCCCTTTCCCTTCTATTAGTAAGAAGAATTGTAGAAAGAGGAGCAGGTACGGGATGAACCGTTTATCCACCATTAGCATCTAATATTGCACACAGAGGGTCATCAGTTGATTTAGCAATTTTTAGGCTTCATCTAGCAGGTATTTCATCAATTTTAGGAGCTGTAAACTTTATTACTACAGTAATTAATATAAAGCCTGTAGGAATAAGCTTTGACCGAATACCTCTCTTTGTATGATCAGTTGCAATCACCGCCTTATTATTATTGCTATCACTACCAGTTTTAGCTGGGGCAATTACAATACTACTAACCGATCGCAACCTAAACACATCATTCTTTGACCCTGCGGGGGGAGGTGACCCAATTTTATATCAACATTTGTTT
>PSFOR681-13|BC-PNEF-PSFOR0558|Ptinomorphus regalis|COI-5P
AACACTATATTTCATCTTTGGGGCATGATCAGGAATAGTGGGAACATCCCTAAGAATATTAATCCGATCAGAACTAGGAAATCCAGGAGCATTAATTGGAGATGACCAGATTTATAATGTAATTGTAACTGCCCATGCATTTATTATAATCTTCTTTATAGTTATACCCATTATAATCGGAGGATTCGGAAATTGACTAGTTCCATTAATATTAGGTGCTCCTGACATAGCTTTCCCCCGAATAAATAATATAAGATTTTGACTTCTACCCCCTTCCCTTTCCCTTCTATTAGTAAGAAGAATTGTAGAAAGAGGAGCAGGTACGGGATGAACCGTTTATCCACCATTAGCATCTAATATTGCACACAGAGGGTCATCAGTTGATTTAGCAATTTTTAGGCTTCATCTAGCAGGTATTTCATCAATTTTAGGAGCTGTAAACTTTATTACTACAGTAATTAATATAAAGCCTGTAGGAATAAGCTTTGACCGAATACCTCTCTTTGTATGATCAGTTGCAATCACCGCCTTATTATTATTGCTATCACTACCAGTTTTAGCTGGGGCAATTACAATACTACTAACCGATCGCAACCTAAACACATCATTCTTTGACCCTGCGGGGGGAGGTGACCCAATTTTATATCAACATTTGTTT
>PSFOR683-13|BC-PNEF-PSFOR0560|Ptinus italicus|COI-5P
AACACTTTATTTTATTCTTGGAGCTTGGTCAGGTATAATTGGAACGTCCCTAAGAATACTAATCCGTTCAGAATTAGGAAGCCCCGGAGCCTTAATTGGAGATGACCAAATTTATAATGTAATTGTAACAGCCCATGCATTCATTATAATTTTTTTCATAGTTATGCCAATTATAATTGGTGGATTTGGAAATTGACTAGTTCCATTAATGTTAGGCGCCCCTGACATAGCTTTTCCACGAATAAATAACATAAGATTCTGATTGCTCCCTCCAGCATTAACTTTCTTAATTATGAGTAGAATAATTGAAAAGGGAGTAGGAACTGGATGAACTGTATATCCACCACTGTCAGCTAATATTGCACATAGAGGAGCATCTGTTGATTTAGCTATTTTCAGACTTCACCTAGCCGGTATTTCATCAATCCTTGGGGCCGTTAATTTCATTACCACAGTAATAAACATGCGACCTGTGGGAATAGATTTAGACCGTATGCCACTATTTGTATGATCAGTTGTTATTACTGCATTACTTCTACTTCTATCATTACCAGTTCTAGCAGGAGCCATTACCATATTATTAACCGACCGAAATTTAAATACATCATTCTTTGATCCCTCAGGGGGAGGTGACCCCATTCTTTACCAACATTTATTT
>PSFOR685-13|BC-PNEF-PSFOR0562|Ptinus palliatus|COI-5P
AACTTTATATTTCATTCTTGGAGCTTGATCAGGAATAATTGGAACATCCCTTAGAATCTTAATCCGATCAGAATTAGGTAATCCTGGTGCCCTAATTGGAGATGACCAAATCTATAATGTTATTGTCACAGCTCATGCTTTTATTATAATTTTTTTCATAGTTATACCAATTATAATTGGAGGATTTGGAAATTGACTTGTACCTCTAATACTAGGAGCACCCGATATAGCATTTCCTCGAATAAATAATATAAGTTTTTGGTTATTGCCCCCAGCCTTAACTTTTTTACTTATAAGAAGAATAATTGAAAGAGGTGTAGGAACAGGTTGAACTGTATACCCGCCCCTTTCAGCTAATATCGCCCATAGAGGGGCATCAGTTGATTTGGCTATCTTCAGCCTACATTTAGCTGGTATCTCTTCAATCTTAGGAGCAGTTAATTTTATTACAACAGTAATTAATATACGCCCTGTTGGAATAACCTTTGACCGTATACCTTTATTTGTTTGGTCAGTTGTAATCACAGCCCTCCTCCTTCTACTTTCATTGCCAGTCCTTGCAGGAGCAATTACCATATTATTAACCGATCGAAATCTAAATACATCATTCTTTGACCCAGCTGGAGGAGGTGACCCAATTCTATACCAACATTTATTT
>PSFOR687-13|BC-PNEF-PSFOR0564|Ptinus sexpunctatus|COI-5P
AACCTTATATTTTATTCTTGGTGCATGATCAGGAATAATCGGAACCTCCTTAAGAATTTTAATCCGCTCAGAACTTGGTAATCCAGGAGCTCTTATTGGAGACGATCAAATCTATAACGTAATTGTTACCGCGCATGCTTTCATTATAATTTTCTTCATAGTAATACCAATTATAATTGGAGGATTTGGAAACTGACTTGTCCCCTTAATATTAGGAGCCCCAGATATAGCCTTTCCACGTATAAACAATATAAGGTTTTGATTGCTACCTCCCGCTTTAACGTTCCTTTTGATAAGAAGATTAGTA---------------------------------------------------------------------------------------------------------------------------------------------------------------------------------------------------------------------------------------------------------------------------------------------------------------------------------------------------------------
>PSFOR815-13|BC-PNEF-PSFOR0692|Purpuricenus kaehleri|COI-5P
TACTTTATATTTTATTTTCGGAGCATGAGCAGGAATAGTGGGAACTTCCCTGAGAGTTCTTATTCGAACAGAACTAGGAAACCCGGGATCTTTAATTGGAGATGATCAAATTTATAATGTTATTGTAACTGCACACGCATTCATTATAATTTTCTTCATAGTTATACCTATTATAATTGGGGGATTTGGAAATTGGCTAGTTCCACTAATACTGGGAGCCCCAGATATGGCATTTCCACGAATAAACAATATAAGATTCTGACTTTTGCCCCCCTCCCTAACTCTTCTAATTATAAGAAGAATTGTCGAAAATGGAGCTGGAACTGGGTGAACAGTTTATCCTCCTCTAGCCGCAAATGTAGCCCATGAAGGATCCTCAGTTGATTTAGCTATCTTCAGCCTCCATCTGGCAGGAATCTCATCAATCCTAGGAGCAGTAAATTTTATTTCCACTGTTATTAATATAAAACCAGAAGGAATAACACCAGAACGTATGCCCTTATTTGTATGAGCAGTTGTTATTACTGCTGTTCTTCTTCTCCTTTCCCTTCCTGTGCTCGCAGGGGCAATTACTATACTTCTAACAGACCGAAACATTAATACATCATTCTTTGACCCCGCAGGAGGAGGGGATCCTATTCTTTACCAACACCTTTTT
>PSFOR295-13|BC-PNEF-PSFOR0267|Pyrochroa coccinea|COI-5P
AACATTATATTTTATTTTAGGTGCGTGATCTGGGATAATTGGTACGTCTATAAGATTAATTATTCGTACAGAATTAGGAAATCCTGGATCTTTAATTGGAGATGATCAAATTTATAATGTTATTGTTACTGCTCATGCTTTCATTATAATTTTTTTCATAGTTATACCAATTATAATTGGAGGATTTGGTAATTGATTAGTTCCATTAATATTAGGAGCTCCTGATATAGCATTTCCACGTATAAATAATATAAGATTTTGACTTCTTCCTCCTTCATTAACATTATTAATTATAAGAAGAATTGTAGAAAATGGAGCTGGAACAGGATGAACAGTTTATCCCCCTCTTTCTTCTAATATTGCTCATAGAGGATCTTCTGTAGATCTTGCAATTTTTAGTTTACACTTAGCAGGAATTTCATCTATTCTAGGAGCAGTAAATTTTATTACTACAGTAATTAATATACGTCCTAGAGGAATATCTTTAGATCGAATACCTTTATTTGTTTGAGCTGTTGTTATTACAGCTGTTTTATTATTACTTTCATTGCCTGTATTAGCAGGTGCAATTACAATATTATTAACAGATCGAAATTTAAATACTACTTTTTTTGATCCTGCTGGTGGTGGAGATCCTATTCTATATCAACATTTATTT
>PSFOR009-13|BC-PASSIFOR0009|Pyrochroa coccinea|COI-5P
AACATTATATTTTATTTTAGGTGCGTGATCTGGGATAATTGGTACGTCTATAAGATTAATTATTCGTACAGAATTAGGAAATCCTGGATCTTTAATTGGAGATGATCAAATTTATAATGTTATTGTTACTGCTCATGCTTTCATTATAATTTTTTTCATAGTTATACCAATTATAATTGGAGGATTTGGTAATTGATTAGTTCCATTAATATTAGGAGCTCCTGATATAGCATTTCCACGTATAAATAATATAAGATTTTGACTTCTTCCTCCTTCATTAACATTATTAATTATAAGAAGAATTGTAGAAAATGGAGCTGGAACAGGATGAACAGTTTATCCCCCTCTTTCTTCTAATATTGCTCATAGAGGATCTTCTGTAGATCTTGCAATTTTTAGTTTACACTTAGCAGGAATTTCATCTATTCTAGGAGCAGTAAATTTTATTACTACAGTAATTAATATACGTCCTAGAGGAATATCTTTAGATCGAATACCTTTATTTGTTTGAGCTGTTGTTATTACAGCTGTTTTATTATTACTTTCATTGCCTGTATTAGCAGGTGCAATTACAATATTATTAACAGATCGAAATTTAAATACTACTTTTTTTGATCCTGCTGGTGGTGGAGATCCTATTCTAT--------------
>PSFOR294-13|BC-PNEF-PSFOR0266|Pyrochroa serraticornis|COI-5P
AACTTTATATTTTATTTTAGGTGCATGATCAGGAATAGTAGGAACGTCAATAAGATTAATTATTCGTACAGAACTAGGAAATCCTGGATCTTTAATTGGGGATGATCAAATTTATAATGTTATTGTGACTGCCCATGCTTTTGTTATAATTTTTTTTATAGTTATGCCAATTATAATCGGAGGATTTGGAAATTGATTAGTTCCTTTAATATTAGGAGCACCTGATATAGCATTCCCTCGAATAAATAATATAAGATTTTGACTTCTTCCCCCCTCATTAACTTTATTAATTATGAGAAGAATTGTAGAAAATGGAGCAGGAACAGGATGAACAGTTTACCCGCCTCTTTCTTCAAATATTGCACATAGAGGATCTTCTGTAGATCTCGCTATTTTTAGATTACACTTAGCAGGGATTTCATCTATTTTAGGTGCAGTAAATTTTATCACCACAGTAATTAATATACGACCAAGAGGTATAACCTTAGATCGAATACCTTTATTTGTTTGAGCTGTAGTAATTACTGCTGTTTTATTATTACTTTCATTACCTGTATTAGCAGGTGCAATTACAATATTATTAACAGATCGAAATTTAAATACAACTTTTTTTGATCCTGTTGGGGGAGGTGATCCAATTTTATACCAACATTTATTT
>PSFOR900-14|BC-PASSIFOR0119|Pyropterus nigroruber|COI-5P
AACACTATATTTTATTTTAGGAACATGAGCAGGAATAATAGGAACTTCTCTAAGATTACTAATTCGAGCAGAATTAGGAACCCCTGGAACTTTAATTGGAAATGACCAAATTTACAATGTCATTGTAACAGCTCACGCATTTATTATAATTTTTTTTATAGTTATACCCATAATAATTGGAGGTTTCGGAAACTGATTAGTACCTCTAATATTAGGAGCTCCTGATATAGCATTTCCACGAATAAATAATATAAGATTTTGGCTACTACCCCCTTCCCTATCTCTTTTAATCACAAGCAGATTAGTAGAAACTGGATCTGGAACAGGATGAACAATTTACCCACCACTATCATCTAATATTGCTCACAGAAGAGCTTCAGTAGACCTGACAATTTTTAGCCTCCACCTAGCTGGTATATCATCTATTCTGGGAGCAGTAAATTTTATTTCAACAATTATTAATATAAAATCACCCAGAATAACCTACGAACAAATGCCTCTTCTAATTTGAGCCGTAGGAATCACAGCATTATTATTACTTTTATCTCTACCTGTATTAGCGGGAGCAATCACTATATTATTAGCAGACCGTAATATAAATACATCATTTTTTGACCCCACAGGAGGAGGAGACCCAATTTTATACCAACATTTATTT
>PSFOR481-13|BC-PASSIFOR0054|Pyrrhidium sanguineum|COI-5P
AACCTTGTACTTTATCCTTGGTGCATGAGCAGGTATAGTAGGTACCTCCTTAAGAATACTAATTCGGTCAGAATTAGGCAACCCAGGATCTCTTATTGGAGACGACCAGATTTATAATGTCATTGTTACAGCCCATGCGTTTATCATAATTTTCTTTATAGTAATACCAATTATAATTGGAGGATTTGGAAATTGGCTTATTCCTCTAATACTAGGGGCCCCTGATATAGCCTTCCCACGAATAAACAATATAAGGTTCTGGCTTCTACCCCCTTCTCTTACCCTATTAATTTCAAGGAGATTAGTTGAAAGAGGGGCGGGAACAGGATGAACCGTTTACCCACCTTTATCCTCTAATATTGCTCATAGAGGGGCATCAGTAGATCTAGCAATTTTTAGGCTACATCTAGCAGGAGTATCCTCAATTCTTGGAGCTGTAAACTTTATTTCCACAGTTATTAATATAAAACCTGTGGGGATAGCTTACGACCAAAT-------------------------------------------------------------------------------------------------------------------------------------------------------------------
>PSFOR020-13|BC-PASSIFOR0020|Pyrrhidium sanguineum|COI-5P
AACCTTGTACTTTATCCTTGGTGCATGAGCAGGTATAGTAGGTACCTCCTTAAGAATACTAATTCGGTCAGAATTAGGCAACCCAGGATCTCTTATTGGAGACGACCAGATTTATAATGTCATTGTTACAGCCCATGCGTTTATCATAATTTTCTTTATAGTAATACCAATTATAATTGGAGGATTTGGAAATTGGCTTATTCCTCTAATACTAGGGGCCCCTGATATAGCCTTCCCACGAATAAACAATATAAGGTTCTGGCTTCTACCCCCTTCTCTTACCCTATTAATTTCAAGGAGATTAGTTGAAAGAGGGGCGGGAACAGGATGAACCGTTTACCCACCTTTATCCTCTAATATTGCTCATAGAGGGGCATCAGTAGATCTAGCAATTTTTAGGCTACATCTAGCAGGAGTATCCTCAATTCTTGGAGCTGTAAACTTTATTTCCACAGTTATTAATATAAAACCTGTGGGGATAGCTTATGACCAAATACCCCTCCTCGTCTGAGCTGTACTTATTACTGCTATTCTCCTCCTATTATCTCTCCCTGTATTAGCTGGAGCTATCACTATACTTTTAACAGACCGAAACATCAATACATCATTTTTTGACCCAGCAGGTGGGGGAGACCCCCTTCTATACCAACACCTATTC
>PSFOR082-13|BC-PNEF-PSFOR0054|Pyrrhidium sanguineum|COI-5P
AACCTTGTACTTTATCCTTGGTGCATGAGCAGGTATAGTAGGTACCTCCTTAAGAATACTAATTCGGTCAGAATTAGGCAACCCAGGATCTCTTATTGGAGACGACCAGATTTATAATGTCATTGTTACAGCCCATGCGTTTATCATAATTTTCTTTATAGTAATACCAATTATAATTGGGGGATTTGGAAATTGGCTTATTCCTCTAATACTAGGGGCCCCTGATATAGCCTTCCCACGAATAAACAATATAAGATTCTGGCTTCTACCCCCTTCTCTTACCCTATTAATTTCAAGGAGATTAGTTGAAAGAGGGGCGGGAACAGGATGAACCGTTTACCCACCTTTATCCTCTAATATTGCTCATAGAGGGGCATCAGTAGATCTAGCAATTTTTAGGCTACATCTAGCAGGAGTATCCTCAATTCTTGGAGCTGTAAACTTTATTTCCACAGTTATTAATATAAAACCTGTGGGGATAGCTTATGACCAAATACCCCTCCTCGTCTGAGCTGTACTTATTACTGCTATTCTCCTCCTATTATCTCTCCCTGTATTAGCTGGAGCTATCACTATACTTTTAACAGACCGAAACATCAATACATCATTTTTTGACCCAGCAGGTGGGGGAGACCCCCTTCTATACCAACACCTATTC
>PSFOR449-13|BC-PNEF-PSFOR0421|Pyrrhidium sanguineum|COI-5P
------------------------------------------------------------------------------------------------------------------------------------------------------------------------------------------------TTGGCTTATTCCTCTAATACTAGGGGCCCCTGATATAGCCTTCCCACGAATAAACAATATAAGGTTCTGGCTTCTACCCCCTTCTCTTACCCTATTAATTTCAAGGAGATTAGTTGAAAGAGGGGCGGGAACAGGATGAACCGTTTACCCACCTTTATCCTCTAATATTGCTCATAGAGGGGCATCAGTAGATCTAGCAATTTTTAGGCTACATCTAGCAGGAGTATCCTCAATTCTTGGAGCTGTAAACTTTATTTCCACAGTTATTAATATAAAACCTGTGGGGATAGCTCATGACCAAATACCCCTCCTCGTCTGAGCTGTACTTATTACTGCTATTCTCCTCCTATTATCTCTCCCTGTATTAGCTGGAGCTATCACTATACTTTTAACAGACCGAAACATCAATACATCATTTTTTGACCCAGCAGGTGGGGGAGACCCCCTTCTATACCAACACCTATTC
>PSFOR236-13|BC-PNEF-PSFOR0208|Pytho depressus|COI-5P
TACATTATATTTTATTTTTGGTGCATGATCAGGAATAGTGGGAACTTCCCTGAGACTTTTAATTCGAGCTGAATTAGGAAATCCTGGTTCTTTAATTGGAGATGACCAAATCTACAACGTAATTGTAACAGCTCATGCATTTGTTATAATTTTTTTTATAGTTATACCTACAGTTATTGGGGGATTTGGGAATTGACTTGTACCTTTAATATTGGGAGCTCCTGATATAGCTTTTCCTCGAATAAATAATATAAGATTTTGATTATTACCCCCCTCTCTTTCTCTTTTAATTATAAGAAGAATTGTAGAAAATGGTGCTGGGACCGGTTGAACAGTATACCCCCCTTTAGCATCAAATATTGCTCATGGGGGATCATCTGTTGATTTAGCTATTTTTAGACTCCATTTAGCTGGAATTTCTTCAATTTTAGGTGCAGTAAATTTTATTACTACAGTTATTAATATACGACCATTAGGAATAACTTTTGATCGAATACCTTTATTTGTATGATCTGTTGTAATTACTGCTGTATTGCTATTATTATCTTTACCAGTTTTAGCCGGAGCTATTACTATACTTTTAACTGATCGAAATCTTAATACATCCTTTTTTGACCCAGCCGGAGGTGGAGATCCAATTTTATATCAACATTTATTT
>PSFOR777-13|BC-PNEF-PSFOR0654|Rabocerus foveolatus|COI-5P
TACTTTGTACTTTATTTTTGGGGCTTGAGCTGGAATAGTCGGAACTTCTTTAAGACTTTTAATTCGAGCTGAATTAGGAAACCCAGGAGCTTTAATCGGAGATGATCAAACATATAATGTTATTGTTACTGCTCATGCATTTATCATAATTTTTTTTATAGTTATGCCTATTGTAATTGGAGGTTTTGGCAACTGACTTGTTCCTTTAATATTAGGAGCCCCAGATATAGCTTTCCCTCGTATAAATAATATAAGTTTTTGATTACTACCCCCATCTTTAACTTTACTAATTATAAGAAGTATTGTTGAAACAGGGGCAGGAACAGGGTGAACAGTATACCCCCCATTAGCAGCAAATATTGCACATAGAGGTCCATCTGTAGATTTAGCAATTTTTAGACTTCACTTAGCAGGAATCTCTTCAATTTTAGGCGCAGTAAATTTTATCACAACCGTAATTAATATACGACCATCAGGAATAAGATTTGACCGAATACCCTTATTTGTATGAGCAGTATTAATTACCGCAATTCTCCTTTTACTTTCTTTACCTGTATTAGCTGGGGCTATTACTATATTATTAACTGACCGGAACTTAAATACCTCTTTTTTTGACCCGGCAGGAGGGGGAGACCCTATTTTATACCAACATTTATTT
>PSFOR972-14|BC-PSFOR-JD0126|Reitterelater bouyoni|COI-5P
CACCCTTTACTTCATCTTTGGTGCATGAGCAGGAATACTAGGCACCTCCTTAAGACTTTTAATCCGCGCTGAATTAGGAAACCCCGGATCACTAATTGGAAACGACCAAATTTACAACGTCATTGTTACTGCACACGCTTTCATTATAATTTTCTTCATAGTTATACCAATCATGATCGGAGGATTCGGAAATTGATTAGTCCCACTAATACTAGGAGCCCCAGATATAGCCTTCCCCCGAATAAACAACATAAGATTTTGGCTACTCCCCCCCTCCTTAAGACTTTTACTAATAAGAAGAATTGTAGAAAACGGAGCAGGAACAGGATGAACTGTATACCCACCCCTATCATCCAACATTGCCCACAGAGGTTCCTCTGTTGATCTAGCAATTTTCAGTCTTCACCTAGCCGGAATCTCATCAATCCTAGGAGCCGTAAACTTCATCTCAACAGTAATCAACATACGATCAACAGGTATATCATTCGATCGTATGCCCCTATTCGTATGAGCAGTAGCAATCACAGCCCTCCTACTTCTTCTTTCACTCCCGGTACTTGCAGGAGCAATCACCATACTACTAACAGATCGAAATCTAAACACTTCATTCTTTGACCCTGCCGGAGGAGGTGACCCAATTCTTTACCAACACTTATTC
>PSFOR973-14|BC-PSFOR-JD0127|Reitterelater dubius|COI-5P
AACCCTATACTTCATCTTTGGAGCATGAGCAGGAATACTAGGCACATCCTTAAGCCTACTAATTCGAGCCGAACTTGGAAACCCTGGTTCACTTATTGGTAACGATCAAATCTATAATGTTATCGTAACAGCACATGCATTTATCATAATTTTCTTCATAGTTATACCAATCATAATTGGTGGATTCGGAAATTGATTAGTCCCCCTAATACTAGGAGCACCTGATATAGCATTCCCACGAATAAACAATATAAGATTCTGATTACTACCCCCATCCTTAAGCCTACTTTTAATAAGAAGAATTGTAGAAAATGGAGCAGGAACAGGATGAACTGTATACCCACCCCTATCATCTAACATTGCCCACAGAGGATCATCAGTCGATTTAGCAATTTTTAGTCTTCACCTTGCAGGAATTTCCTCAATCCTAGGAGCAGTAAATTTTATCTCAACAGTAATCAACATACGATCCCCAGGAATCACATTCGACCGAATACCATTATTTGTTTGAGCAGTAGCTATCACTGCTCTACTCCTTCTTCTATCCCTCCCTGTTCTTGCAGGAGCAATTACAATACTTTTAACAGACCGAAATCTAAACACTTCATTCTTTGACCCTGCAGGAGGAGGAGACCCAATTCTTTACCAACACTTGTTC
>PSFOR876-14|BC-PASSIFOR0094|Rhagium bifasciatum|COI-5P
TACTTTATATTTTGTTTTTGGGGCTTGGGCTAGAATAGTTGGAACATCTTTAAGTTTATTAATTCGTACAGAACTCGGAAATCCCGGATCACTAATTGGTGATGATCAAATTTATAATGTTATTGTAACTGCCCATGCCTTTATCATAATTTTTTTTATAGTTATACCAATTATAATTGGAGGATTTGGAAATTGGTTAGTTCCACTAATATTAGGAGCCCCTGACATGGCTTTTCCTCGAATAAATAACATAAGATTTTGACTTTTACCCCCTTCATTAACTTTATTAATTATAAGAAGAGTTGTAGAAAGAGGTGCTGGAACTGGATGAACTGTTTATCCCCCTCTTTCTTCTAATATTGCTCATAGAGGCTCATCCGTAGATTTAGCAATTTTTAGGCTTCATTTAGCTGGAATTTCTTCTATTTTAGGTGCAGTAAATTTTATTACAACAGCAATCAATATACGACCTACTGAAATAACTCCTGATCGTTTATCCTTATTTATTTGAGCTGTTGTAATTACTGCAATTTTACTTCTTCTTTCTTTACCTGTTTTAGCAGGAGCAATTACAATATTATTAACAGATCGAAATTTAAATACATCATTTTTTGATCCGGCAGGTGGAGGAGACCCAATTCTTTACCAACATTTATTT
>PSFOR444-13|BC-PNEF-PSFOR0416|Rhagium bifasciatum|COI-5P
TACTTTATATTTTGTTTTTGGAGCTTGGGCTAGAATAGTTGGAACATCTTTAAGTTTATTAATTCGTACAGAACTCGGAAATCCCGGATCACTAATTGGTGATGATCAAATTTATAATGTTATTGTAACTGCCCATGCCTTTATCATAATTTTTTTTATAGTTATACCAATTATAATTGGAGGATTTGGAAATTGATTAGTTCCACTAATATTAGGAGCTCCTGACATGGCCTTTCCTCGAATAAATAATATAAGATTTTGACTTTTACCTCCTTCATTAACTTTATTAATTATAAGAAGAGTTGTAGAAAGAGGAGCTGGAACTGGATGAACTGTTTATCCCCCTCTTTCTTCTAATATTGCTCATAGGGGCTCATCTGTAGATTTAGCAATTTTTAGACTTCATTTAGCTGGAATTTCTTCTATTTTAGGTGCAGTAAATTTTATTACAACAGCAATCAATATACGACCTACTGAAATAACTCCCGATCGTTTATCCTTATTTATTTGAGCTGTTGTAATTACTGCAATTTTACTTCTTCTTTCTTTACCTGTTTTAGCAGGAGCAATTACAATATTATTAACAGATCGAAATTTAAATACATCATTTTTTGATCCAGCAGGTGGGGGAGATCCAATTCTTTACCAACATTTATTT
>PSFOR880-14|BC-PASSIFOR0098|Rhagium inquisitor|COI-5P
AACTTTATATTTTATTTTTGGAGCTTGATCAGGAATAGTTGGAACATCCTTAAGATTGTTAATTCGAACAGAACTAGGAAATCCAGGATCTTTAATTGGAGATGATCAAATCTATAATGTTATTGTTACTGCCCATGCTTTTATTATAATTTTTTTCATAGTTATACCAATTATAATTGGAGGATTTGGAAACTGATTAGTTCCCCTAATATTGGGGGCTCCCGATATAGCTTTTCCTCGAATAAATAATATAAGATTTTGACTTTTACCTCCTTCTTTAACTTTATTAATCATAAGAAGAGTGGTAGAAAATGGGGCTGGTACCGGATGAACCGTCTATCCCCCTCTTTCTTCAAATATTGCTCATAGAGGATCTTCAGTTGATTTAGCAATTTTTAGGTTACATTTAGCAGGTATCTCTTCAATTCTTGGTGCAGTAAATTTTATCACTACAGTAATTAATATACGACCAATTGGAATAACTCCTGATCGTGTTCCTTTATTTGTTTGGGCAGTAGTAATTACTGCAATTCTTCTTCTTCTTTCATTACCAGTTTTAGCTGGAGCAATTACTATACTTTTAACAGATCGAAATTTAAATACTTCATTTTTTGATCCTGCAGGAGGTGGTGATCCTATTCTTTATCAACATTTATTT
>PSFOR435-13|BC-PNEF-PSFOR0407|Rhagium inquisitor|COI-5P
AACTTTATATTTTATTTTTGGAGCTTGATCAGGAATAGTTGGAACATCCTTAAGATTGTTAATTCGAACAGAACTAGGAAATCCAGGATCTTTAATTGGAGATGATCAAATCTATAATGTTATTGTTACTGCCCATGCTTTTATTATAATTTTTTTCATAGTTATACCAATTATAATTGGAGGATTTGGAAACTGATTAGTTCCCCTAATATTGGGGGCTCCCGATATAGCTTTTCCTCGAATAAATAATATAAGATTTTGACTTTTACCTCCTTCTTTAACTTTATTAATCATAAGAAGAGTGGTAGAAAATGGGGCTGGTACCGGATGAACCGTCTATCCCCCTCTTTCTTCAAATATTGCTCATAGAGGATCTTCAGTTGATTTAGCAATTTTTAGGTTACATTTAGCAGGTATCTCTTCAATTCTTGGTGCAGTAAATTTTATCACTACAGTAATTAATATACGACCAATTGGAATAACTCCTGATCGTGTTCCTTTATTTGTTTGGGCAGTAGTAATTACTGCAATTCTTCTTCTTCTTTCATTACCAGTTTTAGCTGGAGCAATTACTATACTTTTAACAGATCGAAATTTAAATACTTCATTTTTTGATCCTGCAGGAGGTGGTGATCCTATTCTTTATCAACATTTATTT
>PSFOR083-13|BC-PNEF-PSFOR0055|Rhagium inquisitor|COI-5P
AACTTTATATTTTATTTTTGGAGCTTGATCAGGAATAGTTGGAACATCCTTAAGATTGTTAATTCGAACAGAACTAGGAAATCCAGGATCTTTAATTGGAGATGATCAAATCTATAATGTTATTGTTACTGCCCATGCTTTTATTATAATTTTTTTCATAGTTATACCAATTATAATTGGAGGATTTGGAAACTGATTAGTTCCCCTAATATTGGGGGCTCCCGATATAGCTTTTCCTCGAATAAATAATATAAGATTTTGACTTTTACCTCCTTCTTTAACTTTATTAATCATAAGAAGAGTGGTAGAAAATGGGGCTGGTACCGGATGAACCGTCTATCCCCCTCTTTCTTCAAATATTGCTCATAGAGGATCTTCAGTTGATTTAGCAATTTTTAGGTTACATTTAGCAGGTATCTCTTCAATTCTTGGTGCAGTAAATTTTATCACTACAGTAATTAATATACGACCAATTGGAATAACTCCTGATCGTGTTCCTTTATTTGTTTGGGCAGTAGTAATTACTGCAATTCTTCTTCTTCTTTCATTACCAGTTTTAGCTGGAGCAATTACTATACTTTTAACAGATCGAAATTTAAATACTTCATTTTTTGATCCTGCAGGAGGTGGTGATCCTATTCTTTATCAACATTTATTT
>PSFOR440-13|BC-PNEF-PSFOR0412|Rhagium mordax|COI-5P
AACTTTATATTTTATTTTTGGAGCTTGATCAGGAATAGTCGGAACATCTTTAAGTTTATTAATTCGATCAGAATTAGGAAATCCAGGATCATTAATTGGTGATGATCAAATTTATAATGTAATTGTTACCGCTCATGCTTTCATTATAATTTTCTTTATAGTTATACCTATTATAATTGGAGGATTTGGAAATTGATTAGTTCCATTAATACTTGGAGCTCCTGATATAGCATTCCCTCGAATGAATAATATAAGATTTTGACTTTTACCTCCTTCACTAACTTTATTAATTATAAGAAGAGTAGTAGAAAGTGGTGCTGGAACTGGTTGAACAGTTTATCCCCCTCTTTCATCAAATATTGCTCATAGAGGATCATCTGTTGATTTAGCAATTTTTAGATTACATCTAGCAGGAATTTCTTCAATTCTTGGAGCTGTAAATTTTATTACAACAGTTATTAATATACGACCTGTAGGTATAACTCCAGACCGTGTTCCTTTATTTGTTTGAGCAGTTGTAATTACAGCAATTCTTCTTCTTCTTTCTTTACCTGTTTTAGCAGGTGCTATCACAATATTATTAACAGATCGAAATTTAAATACTTCATTTTTTGATCCTGCAGGAGGAGGAGATCCTATTCTTTATCAACATTTATTT
>PSFOR884-14|BC-PASSIFOR0102|Rhagium mordax|COI-5P
AACTTTATATTTTATTTTTGGAGCTTGATCAGGAATAGTCGGAACATCTTTAAGTTTATTAATTCGATCAGAATTAGGAAATCCAGGATCATTAATTGGTGATGATCAAATTTATAATGTAATTGTTACCGCTCATGCTTTCATTATAATTTTCTTTATAGTTATACCTATTATAATTGGAGGATTTGGAAATTGATTAGTTCCATTAATACTTGGAGCTCCTGATATAGCATTCCCTCGAATGAATAATATAAGATTTTGACTTTTACCTCCTTCACTAACTTTATTAATTATAAGAAGAGTAGTAGAAAGTGGTGCTGGAACTGGTTGAACAGTTTATCCCCCTCTTTCATCAAATATTGCTCATAGAGGATCATCTGTTGATTTAGCAATTTTTAGATTACATCTAGCAGGAATTTCTTCAATTCTTGGAGCTGTAAATTTTATTACAACAGTTATTAATATACGACCTGTAGGTATAACTCCAGACCGTGTTCCTTTATTTGTTTGAGCAGTTGTAATTACAGCAATTCTTCTTCTTCTTTCTTTACCTGTTTTAGCAGGTGCTATCACAATATTATTAACAGATCGAAATTTAAATACTTCATTTTTTGATCCTGCAGGAGGAGGAGATCCTATTCTTTATCAACATTTATTT
>PSFOR084-13|BC-PNEF-PSFOR0056|Rhagium mordax|COI-5P
AACTTTATATTTTATTTTTGGAGCTTGATCAGGAATAGTCGGAACATCTTTAAGTTTATTAATTCGATCAGAATTAGGAAATCCAGGATCATTAATTGGTGATGATCAAATTTATAATGTAATTGTTACCGCTCATGCTTTCATTATAATTTTCTTTATAGTTATACCTATTATAATTGGAGGATTTGGAAATTGATTAGTTCCATTAATACTTGGAGCTCCTGATATAGCATTCCCTCGAATGAATAATATAAGATTTTGACTTTTACCTCCTTCACTAACTTTATTAATTATAAGAAGAGTAGTAGAAAGTGGTGCTGGAACTGGTTGAACAGTTTATCCCCCTCTTTCATCAAATATTGCTCATAGAGGATCATCTGTTGATTTAGCAATTTTTAGATTACATCTAGCAGGAATTTCTTCAATTCTTGGAGCTGTAAATTTTATTACAACAGTTATTAATATACGACCTGTAGGTATAACTCCAGACCGTGTTCCTTTATTTGTTTGAGCAGTTGTAATTACAGCAATTCTTCTTCTTCTTTCTTTACCTGTTTTAGCAGGTGCTATCACAATATTATTAACAGATCGAAATTTAAATACTTCATTTTTTGATCCTGCAGGAGGAGGAGATCCTATTCTTTATCAACATTTATTT
>PSFOR027-13|BC-PASSIFOR0027|Rhagium sycophanta|COI-5P
TACATTATATTTTATTTTTGGAGCCTGATCAGGTATAGTTGGAACTTCATTAAGTTTATTGATTCGATCAGAACTTGGAAATCCCGGCTCATTAATTGGAGATGATCAAATTTATAACGTTATTGTTACCGCTCATGCATTCATTATAATTTTTTTCATAGTTATGCCAATTATAATCGGGGGATTTGGAAATTGATTAGTTCCTTTAATATTAGGAGCCCCTGATATAGCATTTCCTCGAATAAATAATATAAGATTTTGATTATTACCCCCTTCTTTAACTTTATTAATTATAAGAAGAATTGTAGAAAACGGTGCTGGGACTGGATGAACAGTTTATCCACCCCTATCAGCTAATATCGCTCATAGTGGATCATCTGTTGATTTAGCAATTTTCAGATTACATTTAGCTGGTATTTCTTCAATTTTAGGAGCTGTAAATTTTATCACAACAGTAATTAATATACGACCAGTTGGAATAACTCCAGATCGAGTTCCACTATTCGTCTGAGCTGTAGTAATCACAGCAATTTTACTTCTTCTTTCTTTACCTGTATTAGCTGGAGCAATTACTATACTTTTAACAGATCGAAATTTAAATACATCATTTTTTGATCCTGCTGGTGGAGGAGACCCAATTTTATACCAACACCTATTT
>PSFOR443-13|BC-PNEF-PSFOR0415|Rhagium sycophanta|COI-5P
TACATTATATTTTATTTTTGGAGCCTGATCAGGTATAGTTGGAACTTCATTAAGTTTATTGATTCGATCAGAACTTGGAAATCCCGGCTCATTAATTGGAGATGATCAAATTTATAACGTTATTGTTACCGCTCATGCATTCATTATAATTTTTTTCATAGTTATGCCAATTATAATCGGGGGATTTGGAAATTGATTAGTTCCTTTAATATTAGGAGCCCCTGATATAGCATTTCCTCGAATAAATAATATAAGATTTTGATTATTACCCCCTTCTTTAACTTTATTAATTATAAGAAGAATTGTAGAAAACGGTGCTGGGACTGGATGAACAGTTTATCCACCCCTATCAGCTAATATCGCTCATAGTGGATCATCTGTTGATTTAGCAATTTTCAGATTACATTTAGCTGGTATTTCTTCAATTTTAGGAGCTGTAAATTTTATCACAACAGTAATTAATATACGACCAGTTGGAATAACTCCAGATCGAGTTCCACTATTCGTCTGAGCTGTAGTAATCACAGCAATTTTACTTCTTCTTTCTTTACCTGTATTAGCTGGAGCAATTACTATACTTTTAACAGATCGAAATTTAAATACATCATTTTTTGATCCTGCTGGTGGAGGAGACCCAATTTTATACCAACACCTATTT
>PSFOR085-13|BC-PNEF-PSFOR0057|Rhamnusium bicolor|COI-5P
AACATTATATTTTTTATTTGGGGCTTGAGCTAGAATAGTTGGAACATCTTTAAGTTTATTAATTCGAACTGAATTAGGAAATCCAGGATCTTTAATTGGTGATGATCAAATTTATAATGTTATTGTAACAGCTCATGCTTTTGTCATAATTTTTTTTATAGTTATACCTATTATAATTGGAGGATTCGGAAATTGATTAGTTCCATTAATATTAGGAGCTCCAGATATAGCTTTCCCTCGAATGAATAATATAAGATTTTGATTTTTACCTCCATCCTTAATTTTATTAATTATAAGAAGAATTGTAGAAAAAGGAGCAGGAACAGGTTGAACAGTTTATCCACCTTTATCTTCAAATATTTCTCATAGAGGATCTTCTGTTGATTTAGCTATTTTTAGTCTTCATTTAGCTGGGATTTCTTCTATTTTAGGTGCTGTAAATTTTATTACTACTATTATTAATATACGACCTTCAGGAATATCTTTAGACCAAATACCTTTATTTGTTTGAGCAGTAAAAATTACTGCAATTCTTCTTCTTTTATCATTACCTGTTTTAGCTGGAGCTATCACAATACTTTTAACAGATCGAAATTTAAATACATCATTTTTTGATCCTGCAGGAGGTGGAGATCCTATCCTTTACCAACATTTATTT
>PSFOR182-13|BC-PNEF-PSFOR0154|Rhaphitropis oxyacanthae|COI-5P
AACATTATATTTTATTTTTGGTGCTTGAGCAGGAATAATGGGAACTTCCCTAAGAATCTTAATCCGAACAGAATTAGGAAATCCAGGCTCATTAATTGGTGACGATCAAATTTACAATGTTATTGTTACTGCCCATGCTTTTATTATAATTTTTTTTATAGTTATACCAACTATGATTGGTGGATTTGGAAATTGATTAGTACCCCTAATACTGGGTGCCCCAGATATAGCATTCCCTCGAATAAATAATATAAGATTTTGACTTTTACCCCCTTCTTTAACTTTACTAGTAATAAGAAGAATTGTAGAAAGAGGTGCAGGAACAGGTTGAACTGTTTATCCCCCTCTTTCATCAAATATTGCCCATGGGGGGTCTTCTGTAGATTTAGCTATTTTTAGTCTTCATCTTGCTGGAATTTCTTCAATTTTAGGAGCTGTAAATTTTATTACTACAATCATCAATATACGCCCCTCTGGAATAACATTAGATCGAGTTCCTTTATTTGTTTGAGCTGTAGGAATTACAGCTCTTCTCCTTTTACTCTCCCTTCCAGTTCTTGCCGGTGCAATTACAATATTACTAACAGATCGAAATTTAAATACTTCTTTTTTCGACCCTGCCGGAGGAGGTGACCCCATTCTTTATCAAC--------
>PSFOR560-13|BC-PNEF-PSFOR0437|Rhizophagus aeneus|COI-5P
AACTTTATATTTTATTTTTGGAGCCTGATCAGGAATAGTAGGAACTTCCCTAAGTTTATTAATTCGTACAGAATTAGGAACTCCCGGTCAATTAATCGGTGATGACCAAATTTATAATGTAATTGTTACTGCTCATGCCTTTATTATAATTTTTTTTATAGTTATACCTATTTTAATTGGAGGATTTGGAAACTGACTAGTACCCCTAATACTAGGAGCTCCAGATATAGCCTTCCCACGAATAAATAACATAAGATTTTGACTACTCCCTCCTTCTTTAACTTTATTAATTATAAGAAGAATTGTAGAAAAAGGAGCAGGAACTGGATGAACTGTTTATCCTCCTTTATCTTCAAATATTGCCCATAGAGGTTCTTCTGTTGATTTAGCTATTTTTAGTTTACACTTAGCTGGAATTAGCTCAATCTTGGGTGCAGTAAATTTTATTACCACAGTAATTAATATACGACCAAAAGGAATAAATTTAGACCGAACTCCCTTATTTGTTTGAGCTGTAATTATTACAGCAATTCTTTTACTTATTTCTTTACCTGTATTAGCAGGTGCTATTACAATATTATTAACAGATCGAAATTTAAATACTTCTTTTTTTGATCCTGCAGGAGGAGGAGACCCTATTTTGTACCAACATTTATTT
>PSFOR569-13|BC-PNEF-PSFOR0446|Rhizophagus brancsiki|COI-5P
AACATTATACTTTATTTTTGGAGCATGGGCTGGTATAGTAGGAACTTCATTAAGATTATTAATTCGAGCAGAATTAGGGACCCCCGGACAATTAATTGGTGATGATCAAATTTATAATGTAATTGTTACTGCTCACGCTTTCATCATAATTTTTTTTATAGTTATACCTATTTTAATTGGAGGATTTGGAAATTGATTAGTTCCTCTAATATTAGGAGCCCCTGATATGGCTTTCCCTCGAATAAATAACATAAGATTTTGACTATTGCCTCCCTCTTTAACTCTTTTAATTATAAGAAGAATTATTGAAAATGGTGCAGGAACAGGATGAACAGTATACCCCCCACTATCATCCAATATTGCCCATAGAGGATCCTCAGTTGATTTAGCTATTTTTAGTCTTCATCTTGCAGGAATTAGATCAATTTTAGGAGCAGTAAATTTTATTACAACTGTGATTAATATGCGACCTTCTGGAATAAACTTAGACCGAACTCCTTTATTTGTTTGGGCAGTTATTATTACTGCAACATTACTTCTTTTATCTTTACCTGTATTAGCAGGTGCCATCACCATACTATTAACTGATCGAAATTTAAATACTTCGTTTTTCGATCCTGCTGGAGGAGGGGACCCTATTTTATACCAACACTTGTTT
>PSFOR564-13|BC-PNEF-PSFOR0441|Rhizophagus cribratus|COI-5P
-----------------------------------------------------------------------------------------------------------------------------------------------------------------------------------------------------------------------------------------------------------TAAGATTTTGATTATTGCCCCCTTCTTTAACTTTATTGGTAATAAGAAGAATTGTAGAAAATGGTGCTGGAACTGGGTGAACTGTTTACCCACCTTTATCAGCAAATATTGCCCACAGCGGTTCTTCAGTAGATTTAGCTATTTTTAGTTTACATTTAGCAGGAATTAGATCAATTTTAGGAGCTGTAAATTTTATTACCACAGTAATTAATATACGACCAATAGGAATAACTTTAGACCGAACTCCCCTATTTGTCTGAGCAGTTATTATTACTGCAACTTTATTATTAATTTCTCTACCTGTATTAGCAGGTGCCATTACTATATTATTAACTGATCGAAATTTAAATACTTCGTTTTTTGACCCTGCGGGAGGAGGGGACCCAATTTTATATCAACATTTA---
>PSFOR877-14|BC-PASSIFOR0095|Rhizophagus cribratus|COI-5P
AACATTATATTTTATTTTTGGAGCTTGATCAGGAATACTGGGAACTTCTCTAAGACTTTTAATTCGTACTGAATTAGGAACTCCCGGTCAATTAATTGGAAATGATCAAATTTATAATGTAATTGTCACAGCCCATGCATTTATCATAATTTTCTTTATAGTTATACCCATTTTAATTGGAGGTTTCGGAAATTGATTAGTCCCATTAATATTAGGTGCCCCAGATATAGCTTTCCCTCGAATAAACAACATAAGATTTTGATTATTGCCCCCTTCTTTAACTTTATTGGTAATAAGAAGAATTGTAGAAAATGGTGCTGGAACTGGGTGAACTGTTTACCCACCTTTATCAGCAAATATTGCCCACAGCGGTTCTTCAGTAGATTTAGCTATTTTTAGTTTACATTTAGCAGGAATTAGATCAATTTTAGGAGCTGTAAATTTTATTACCACAGTAATTAATATACGACCAATAGGAATAACTTTAGACCGAACTCCCCTATTTGTTTGAGCAGTTATTATTACTGCAACTTTATTATTAATTTCTCTACCTGTATTAGCAGGTGCCATTACTATATTATTAACTGATCGAAATTTAAATACTTCGTTTTTTGACCCTGCGGGAGGAGGAGACCCAATTTTATATCAACATTTATTT
>PSFOR484-13|BC-PASSIFOR0057|Rhizophagus cribratus|COI-5P
AACATTATATTTTATTTTTGGAGCTTGATCAGGAATACTGGGAACTTCTCTAAGACTTTTAATTCGTACTGAATTAGGAACTCCCGGTCAATTAATTGGAAATGATCAAATTTATAATGTAATTGTCACAGCCCATGCATTTATCATAATTTTCTTTATAGTTATACCCATTTTAATTGGAGGATTCGGAAATTGATTAGTCCCATTAATATTAGGTGCCCCAGATATAGCTTTCCCTCGAATAAACAACATAAGATTTTGATTATTGCCCCCTTCTTTAACTTTATTGGTAATAAGAAGAATTGTAGAAAATGGTGCTGGAACTGGGTGAACTGTTTACCCACCTTTATCAGCAAATATTGCCCACAGCGGTTCTTCAGTAGATTTAGCTATTTTTAGTTTACATTTAGCAGGAATTAGATCAATTTTAGGAGCTGTAAATTTTATTACCACAGTAATTAATATACGACCAATAGGAATAACTTTAGACCGAACTCCCCTATTTGTTTGAGCAGTTATTATTACTGCAACTTTATTATTAATTTCTCTACCTGTATTAGCAGGTGCCATTACTATATTATTAACTGATCGAAATTTAAATACTTCGTTTTTTGACCCTGCGGGGGGAGGAGACCCAATTTTATATCAACATTTATTT
>PSFOR561-13|BC-PNEF-PSFOR0438|Rhizophagus depressus|COI-5P
AACTTTATATTTCATTTTTGGTGCTTGGGCTGGAATAGTAGGAACTTCCCTTAGTTTACTAATTCGAGCAGAATTAGGTACTCCAGGACAATTAATCGGAGATGACCAAATCTACAATGTAATTGTTACAGCTCATGCTTTTATTATAATTTTTTTCATAGTTATACCAATTTTAATTGGTGGGTTCGGAAATTGATTAGTCCCTCTAATATTAGGAGCCCCTGACATAGCTTTCCCTCGAATAAATAATATAAGATTCTGACTTCTTCCTCCTTCATTAACACTTCTAATTATAAGAAGAATCGTTGAAAATGGGGCAGGAACTGGGTGAACAGTATACCCTCCTCTCTCTTCTAATATTGCTCATAGAGGGTCTTCTGTTGATTTAGCAATTTTCAGCTTACATTTAGCAGGAATTAGATCAATTTTAGGTGCTGTAAATTTTATTACAACTGTAATTAATATACGCCCTTCTGGAATAACTTTAGATCGAACCCCTTTATTTGTATGAGCTGTGATTATTACCGCAACTTTACTTCTTTTATCCCTACCTGTATTAGCAGGTGCTATTACAATACTTTTAACTGATCGAAATTTAAATACATCATTTTTTGACCCTGCAGGTGGGGGAGACCCAATTCTATACCAACACTTATTC
>PSFOR566-13|BC-PNEF-PSFOR0443|Rhizophagus nitidulus|COI-5P
-----------------------------------------------------------------------------------------------------------------------------------------------------------------------------------------------------------------------------------------------------------TAAGATTTTGATTACTACCTCCTTCCCTAACTTTACTGATTATAAGAAGAATTGTTGAAAATGGAGCCGGAACAGGATGAACAGTATACCCCCCACTGTCATCTAATATTGCCCATAGAGGATCTTCTGTAGATTTAGCTATTTTTAGATTACACCTTGCAGGAATTAGATCAATTCTAGGAGCTGTAAATTTTATTACAACTGTAATTAATATACGACCCTCTGGAATAACCCTAGATCGAACCCCTTTATTTGTATGAGCAGTTATTATTACTGCTACTTTACTTCTTCTATCTTTACCTGTACTAGCTGGTGCCATTACCATATTATTAACAGATCGAAACTTAAATACTTCATTTTTTGATCCTGCAGGAGGAGGTGACCCTATTCTATACCAACACCTATTT
>PSFOR568-13|BC-PNEF-PSFOR0445|Rhizophagus paralellocollis|COI-5P
AACATTATATTTTATTTTTGGAGCATGAGCTGGAATAGTAGGAACTTCATTAAGATTATTAATTCGAGCAGAATTGGGCACCCCCGGCCAATTAATTGGAAATGATCAAATTTATAATGTAATTGTTACTGCTCATGCTTTTGTCATAATTTTTTTCATAGTAATACCCATTTTAATTGGAGGATTTGGAAATTGACTAGTACCCCTAATACTAGGAGCCCCTGATATAGCTTTCCCTCGAATAAATAATATAAGATTTTGGTTGCTACCCCCATCCTTAACTTTATTAGTTATAAGAAGAATTATTGAAAATGGTGCCGGAACAGGATGAACAGTATACCCCCCACTGTCATCTAATATTACCCATAGAGGATCATCAGTTGATTTAGCTATTTTCAGTCTTCACCTTGCAGGAATTAGATCAATTTTAGGAGCAGTAAATTTCATTACAACTGTAATTAATATACGACCCTCTGGAATAACTCTTGATCGAACCCCTTTATTTGTTTGAGCAGTTATTATTACTGCAACATTACTTTTACTATCACTGCCTGTATTGGCAGGTGCTATCACCATATTATTAACTGATCGAAATTTAAATACTTCATTCTTTGATCCCGCTGGAGGAGGAGATCCAATTTTATATCA----------
>PSFOR565-13|BC-PNEF-PSFOR0442|Rhizophagus perforatus|COI-5P
-------------------------------------------------TTAAGACTGTTAATTCGAGTAGAATTAGGAACTCCCGGTCAATTAATTGGAAATGATCAAATTTATAATGTAATTGTTACAGCACATGCTTTTATCATAATCTTTTTTATAGTTATACCTATTTTAATTGGAGGATTTGGAAATTGACTAGTCCCTTTAATATTAGGAGCCCCCGATATAGCTTTTCCTCGAATAAATAATATAAGATTTTGATTACTACCTCCTTCCTTAACTTTACTAATTATAAGAAGAATCGTTGAAAATGGAGCTGGAACAGGATGAACAGTATACCCCCCACTATCATCCAACATCGCTCATAGAGGGTCATCAGTTGACCTAGCTATTTTCAGCCTCCATCTTGCAGGAATTAGATCTATTCTAGGAGCAGTAAATTTTATTACAACTGTAATTAATATACGTCCTTCTGGAATAACCCTTGATCGAACTCCATTATTTGTCTGAGCAGTTATTATTACTGCAACATTACTTTTATTATCATTACCTGTACTAGCAGGAGCTATCACTATATTATTAACTGATCGAAACTTAAATACCTCATTTTTTGATCCTGCTGGAGGAGGAGACCCTATTTTATACCAACATTTATTT
>PSFOR155-13|BC-PNEF-PSFOR0127|Ropalopus femoratus|COI-5P
AACATTATATTTCATTTTTGGAGCCTGGGCAGGAATAGTCGGAACTTCCCTTAGAGTTTTAATTCGAACCGAATTAGGGAATCCAGGATCATTAATTGGTGATGACCAAATCTACAACGTTATTGTAACAGCCCATGCATTTATTATAATTTTTTTCATAGTTATACCAATTATAATTGGTGGATTTGGAAATTGACTAGTCCCTTTAATATTAGGAGCACCAGATATAGCATTCCCACGAATAAATAATATAAGATTCTGGCTACTCCCACCATCATTGACCCTCTTAATCATAAGAAGAATTGTTGAAAACGGAGCAGGAACAGGATGAACAGTGTACCCACCACTCTCAGCCAATCTTGCTCACAGAGGATCTTCAGTAGATTTAGCTATTTTCAGCCTCCACCTGGCTGGAATCTCTTCAATTTTAGGAGCTGTAAATTTCATTTCAACAGTAATTAATATACGACCATTAGGAATAACTCCTGAACGAATACCCCTATTTGTTTGAGCAGTGGTAATTACTGCCATCTTATTACTTTTATCCCTCCCTGTCCTTGCAGGAGCAATTACTATACTTTTAACTGATCGAAATATTAATACATCATTTTTTGATCCAGCAGGTGGGGGAGACCCAATTCTATACCAACACTTGTTT
>PSFOR086-13|BC-PNEF-PSFOR0058|Rosalia alpina|COI-5P
GACCTTATACTTTGTATTTGGAGCTTGATCAGGAATAGTAGGAACATCATTAAGATTACTAATTCGTTCTGAACTTGGAAATCCAGGATCTTTAATTGGAGACGATCAAATTTATAATGTTATTGTAACTGCTCATGCCTTCATTATAATTTTTTTCATAGTTATACCTATTATAATAGGAGGATTTGGAAACTGACTTGTTCCATTAATACTAGGAGCCCCCGATATAGCATTTCCACGAATAAATAATATAAGGTTCTGACTATTACCACCATCACTTACACTTTTAATCATAAGAAGATTTGTTGAAAACGGTGCAGGAACAGGATGAACAGTTTATCCCCCATTATCTGCTAATATTGCTCATAGAGGATCATCAGTAGATTTAGCAATTTTTAGTTTACATCTTGCAGGAGTTTCATCTATTCTAGGTGCTGTAAACTTTATTTCTACAGTAATTAATATACGACCCAGAGGTATATTACCAGAACGTATACCTCTATTTGTTTGAGCTGTAGTTATTACAGCAATTCTTCTTTTATTAGCTTTGCCTGTTCTAGCCGGAGCTATTACTATATTACTTACGGATCGAAATATTAATACATCATTTTTTGACCCAGCTGGTGGGGGAGATCCAATTCTTTATCAACACCTATTT
>PSFOR311-13|BC-PNEF-PSFOR0283|Rosalia alpina|COI-5P
GACCTTATACTTTGTATTTGGAGCTTGATCAGGAATAGTAGGAACATCATTAAGATTACTAATTCGTTCTGAACTTGGAAATCCAGGATCTTTAATTGGAGACGATCAAATTTATAATGTTATTGTAACTGCTCATGCCTTCATTATAATTTTTTTCATAGTTATACCTATTATAATAGGAGGATTTGGAAACTGACTTGTTCCATTAATACTAGGAGCCCCCGATATAGCATTTCCACGAATAAATAATATAAGGTTCTGACTATTACCACCATCACTTACACTTTTAATCATAAGAAGATTTGTTGAAAACGGTGCAGGAACAGGATGAACAGTTTATCCCCCATTATCTGCTAATATTGCTCATAGAGGATCATCAGTAGATTTAGCAATTTTTAGTTTACATCTTGCAGGAGTTTCATCTATTCTAGGTGCTGTAAACTTTATTTCTACAGTAATTAATATACGACCCAGAGGTATATTACCAGAACGTATACCTCTATTTGTTTGAGCTGTAGTTATTACAGCAATTCTTCTTTTATTAGCTTTGCCTGTTCTAGCCGGAGCTATTACTATATTACTTACGGATCGAAATATTAATACATCATTTTTTGACCCAGCTGGTGGGGGAGATCCAATTCTTTATCAACACCTATTT
>PSFOR278-13|BC-PNEF-PSFOR0250|Rushia parreyssi|COI-5P
AACTCTATACTTTATTTTTGGTGCTTGATCAGGAATAGTGGGTACTTCTTTAAGACTGTTAATTCGCTCAGAACTTGGAAACCCTGGTTCTTTAATTGGCGATGATCAAATTTATAATGTTATTGTTACTGCTCATGCATTTATTATAATTTTTTTTATAGTTATGCCTATTTTAATTGGCGGATTTGGTAATTGATTAGTCCCTTTAATACTAGGGGCCCCAGATATGGCCTTTCCTCGAATAAACAATATAAGATTTTGGCTATTACCCCCTTCTTTAACTTTATTGATTATAAGAAGAGTTGTAGAAAGAGGGGCAGGAACGGGCTGAACAGTTTACCCCCCCCTCTCGTCAAATATTGCGCATGGGGGTTCTTCAGTAGATTTAGCCATTTTTAGATTACACCTAGCAGGAATTTCTTCTATTCTAGGTGCTGTAAATTTCATTACTACTGTAATTAATATACGACCAAAAGGAATAACCCTTGATCGAATGCCTTTATTTGTATGAGCCGTAGTATTAACAGCAATTCTTCTTCTCCTATCACTTCCAGTTCTAGCAGGAGCTATTACCATGCTTCTTACAGACCGAAATTTAAATACCTCATTTTTTGACCCTGCAGGAGGTGGGGATCCTATTTTATACCAACACTTATTT
>PSFOR451-13|BC-PNEF-PSFOR0423|Rutpela maculata|COI-5P
TACTTTATATTTTATTTTTGGGGCTTGGGCTAGAATAGTTGGAACTTCACTTAGACTTCTAATTCGATCTGAATTAGGAAATCCTGGATCTTTAATTGGTGATGATCAAATCTATAATGTAATTGTCACAGCTCATGCATTTGTAATAATTTTTTTTATGGTTATACCAATTATAATTGGGGGATTCGGAAATTGATTAGTCCCATTAATATTGGGAGCCCCTGATATGGCCTTCCCTCGAATAAATAATATAAGATTCTGGCTTTTACCGCCTTCACTTACACTTTTAATTATAAGAAGAATTGTAGAAAGAGGGGCGGGAACAGGATGAACAGTTTATCCCCCTTTATCATCTAATATTGCCCATGGAGGATCTTCAGTTGATTTAGCTATTTTTAGATTACATTTAGCAGGAATTTCTTCTATTTTAGGAGCTGTAAATTTTATTACTACTGTTATTAATATACGACCTAAAGGTATAAGACCTGACCGTATACCTCTTTTTGTTTGGGCTGTAGTAATCACTGCAGTTCTTTTACTTTTATCCTTACCAGTTTTAGCAGGTGCTATTACTATACTTCTAACAGATCGTAATTTAAATACTTCTTTTTTTGATCCTGCAGGAGGAGGAGACCCCATTTTATATCAACATTTATTC
>PSFOR450-13|BC-PNEF-PSFOR0422|Rutpela maculata|COI-5P
TACTTTATATTTTATTTTTGGGGCTTGGGCTAGAATAGTTGGAACTTCACTTAGACTTCTAATTCGATCTGAATTAGGAAATCCTGGATCTTTAATTGGTGATGATCAAATCTATAATGTAATTGTCACAGCTCATGCATTTGTAATAATTTTTTTTATGGTTATACCAATTATAATTGGGGGATTCGGAAATTGATTAGTCCCATTAATATTGGGAGCCCCTGATATGGCCTTCCCTCGAATAAATAATATAAGATTCTGGCTTTTACCGCCTTCACTTACACTTTTAATTATAAGAAGAATTGTAGAAAGAGGGGCGGGAACAGGATGAACAGTTTATCCCCCTTTATCATCTAATATTGCCCATGGAGGATCTTCAGTTGATTTAGCTATTTTTAGATTACATTTAGCAGGAATTTCTTCTATTTTAGGAGCTGTAAATTTTATTACTACTGTTATTAATATACGACCTAAAGGTATAAGACCTGACCGTATACCTCTTTTTGTTTGGGCTGTAGTAATCACTGCAGTTCTTTTACTTTTATCCTTACCAGTTTTAGCAGGTGCTATTACTATACTTCTAACAGATCGTAATTTAAATACTTCTTTTTTTGATCCTGCAGGAGGAGGAGACCCCATTTTATATCAACATTTATTC
>PSFOR345-13|BC-PNEF-PSFOR0317|Salpingus planirostris|COI-5P
TACTTTGTACTTTATTTTTGGTGCTTGATCAGGAATAGTGGGAACTTCCCTTAGACTGCTAATTCGAGCAGAACTAGGTAACCCTGGGTCTTTAATTGGAGATGATCAAATTTATAATGTTATTGTTACAGCCCATGCTTTTGTTATAATTTTTTTTATAGTAATACCAATTGTAATTGGCGGATTTGGAAACTGATTAGTCCCTTTGATACTTGGAGCTCCTGACATAGCTTTCCCTCGAATAAATAATATAAGATTTTGGCTTCTTCCCCCCTCCTTAACTCTTTTAATTATAAGAAGAATCGTCGAAAGAGGGGCCGGAACAGGGTGGACTGTTTACCCTCCTTTAGCAGCTAATATTGCTCATGGAGGATCTTCTGTAGATTTAGCTATTTTTAGACTTCATTTAGCTGGAATTTCCTCAATTCTAGGAGCAGTTAATTTCATTACAACTGTGATTAATATACGCCCATCAGGAATAAGGTTTGATCGAATGCCTTTATTTGTATGAGCTGTTGTTATTACAGCTGTTCTATTACTTCTTTCTCTTCCAGTTCTTGCTGGGGCAATTACTATACTCTTAACTGATCGAAATTTAAATACAACATTTTTTGATCCTGCAGGAGGAGGAGATCCTATTCTTTACCAACATTTATTT
>PSFOR494-13|BC-PASSIFOR0067|Salpingus planirostris|COI-5P
-----------------------------------------------------------------------------------------------------------------------------------------------------------------------------------------------------------------------------------------------------------TAAGATTTTGGCTTCTTCCCCCCTCCTTAACTCTTTTAATTATAAGAAGAATCGTCGAAAGAGGAGCCGGAACAGGATGAACTGTTTACCCTCCTTTAGCAGCTAATATTGCTCATGGAGGATCTTCTGTAGATTTAGCTATTTTTAGACTTCATTTAGCTGGAATTTCCTCAATTTTAGGAGCAGTTAATTTCATCACAACTGTAATTAACATACGCCCATCAGGAATAAGGTTTGATCGAATGCCTTTATTTGTATGAGCTGTTGTTATTACAGCTGTTCTATTACTTCTTTCTCTTCCAGTTCTTGCTGGGGCAATTACTATGCTCTTAACTGATCGAAATTTAAATACAACATTTTTTGATCCTGCAGGAGGAGGAG--------------------------
>PSFOR1030-14|PASSIFOR-NM13-050|Salpingus ruficollis|COI-5P
GACCTTGTATTTTATCTTCGGTGCTTGGTCCGGAATAGTTGGGACTTCCTTAAGACTTTTAATCCGTGCAGAATTAGGAAATCCTGGATCCTTAATTGGTGATGATCAAATTTACAATGTGATTGTAACAGCCCATGCTTTTGTTATAATTTTTTTTATAGTTATACCTGTTGTAATTGGAGGATTTGGAAATTGATTAGTACCTTTAATACTTGGGGCACCAGATATAGCATTCCCACGAATAAACAATATAAGATTCTGATTACTCCCTCCCTCATTAACCTTACTAATTATGAGAAGTATTGTAGAAAGAGGAGCAGGGACAGGCTGGACTGTTTATCCCCCCTTAGCAGCTAATATCGCTCATGGAGGTTCTTCTGTAGATTTAGCTATTTTTAGGCTTCATCTTGCAGGTGTTTCCTCAATTTTAGGGGCAGTAAATTTTATTACAACTGTTATTAATATACGTCCTTCAGGGATAAGATTTGACCGTATACCTTTATTTGTTTGATCTGTTGTTATTACAGCAGTGCTCCTTCTTCTCTCTTTACCAGTTCTTGCTGGAGCAATCACTATACTTCTTACAGATCGAAATTTAAACACCTCTTTTTTTGATCCTGCCGGAGGGGGAGACCCAATTCTTTACCAACATCTATTT
>PSFOR346-13|BC-PNEF-PSFOR0318|Salpingus ruficollis|COI-5P
-----------------------------------------------------------------------------------------------------------------------------------------------------------------------------------------------------------------------------------------------------------------------------------------------------------------------------------------------------------TAGCAGCTAATATCGCTCATGGAGGTTCTTCTGTAGATTTAGCTATTTTTAGGCTTCATCTTGCAGGTGTTTCCTCAATTTTAGGGGCAGTAAATTTTATTACGACTGTTATTAATATACGTCCTTCAGGGATAAGATTTGACCGTATACCTTTATTTGTTTGATCTGTTGTTATTACAGCAGTGCTCCTTCTTCTCTCT---------------------------------------------------------------------------------------------------------------
>PSFOR781-13|BC-PNEF-PSFOR0658|Salpingus tapirus|COI-5P
------------------------------------AGTCGGAACATCTTTAAGGTTGCTAATTCGAGCCGAATTAGCTAACCCTGGGTCTCTGATTGGGAATGACCAAATTTATAATGTAATTGTCACAGCTCATGCTTTTATTATAATTTTTTTCATAGTTATACCTATTGTAATTGGGGGGTTCGGAAATTGGCTAGTTCCTCTTATACTAGGAGCTCCTGATATAGCTTTCCCTCGAATAAATAATATAAGATTTTGACTTTTGCCTCCTTCCTTAACTTTATTAATTATGAGAAGAATCGTTGAAAGGGGGGCGGGTACAGGGTGAACTGTATACCCCCCATTAGCAGCAAATATTGCCCATGGGGGATCTTCTGTTGATTTAGCAATCTTTAGCCTTCATTTAGCAGGGGTATCTTCAATTTTAGGGGCTGTAAATTTTATTACAACTGTTATTAATATACGACCCTCAGGAATAAGATTTGACCGAATACCATTATTTGTTTGATCAGTAGTAATTACGGCAATTCTTCTTCTTTTATCCCTCCCAGTTCTTGCTGGAGCAATCACAATATTATTAACAGACCGAAATCTTAATACTTCTTTTTTTGATCCTGCGGGAGGAGGGGACCCTATTCTTTACCAACATTTATTT
>PSFOR782-13|BC-PNEF-PSFOR0659|Salpingus zeneus|COI-5P
AACATTGTATTTTATTTTTGGTGCTTGATCAGGAATAGTGGGGACATCTTTAAGATTACTAATTCGGGCTGAATTAGCTAATCCTGGATCTTTAATTGGAGATGACCAAATTTATAATGTAATTGTTACAGCACATGCTTTTATTATAATTTTTTTTATAGTTATACCTATTGTAATTGGGGGATTTGGAAATTGATTAGTTCCTCTCATGTTAGGAGCCCCTGATATAGCCTTCCCTCGAATAAATAATATAAGATTTTGGCTTTTACCTCCCTCACTAACTTTACTTATTATAAGAAGAATCGTGGAAAGAGGTGCCGGGACAGGGTGAACTGTTTACCCTCCGCTAGCTGCAAACATTGCCCATGGGGGATCTTCTGTTGATTTAGCAATTTTTAGTCTTCATTTAGCAGGAGTATCCTCAATTTTAGGGGCTGTAAATTTTATTACAACTGTGATTAATATACGACCTTCAGGAATAAGATTTGACCGAATACCTTTATTTGTATGGTCAGTAGTAATTACAGCTGTTCTTCTTCTTTTATCTCTCCCAGTTCTTGCAGGGGCAATCACAATATTACTTACAGACCGAAACTTGAATACTTCTTTTTTCGACCCCGCAGGTGGGGGAGACCCAATTCTTTACCAACATTTATTT
>PSFOR087-13|BC-PNEF-PSFOR0059|Saperda populnea|COI-5P
TACTCTGTACTTTATATTCGGTTCATGAGCTGGAATAATAGGAACATCCCTTAGTCTTCTTATTCGATCTGAATTAGGAACCCCAGGCTCTCTAATTGGAGATGACCAAATTTATAATGTAATTGTTACGGCCCATGCTTTCATTATAATTTTTTTTATGGTTATACCTATTATAATTGGAGGATTTGGAAATTGACTAGTACCCTTAATACTAGGAGCTCCTGATATAGCCTTCCCTCGCATAAATAATATAAGATTTTGACTTTTACCCCCATCCCTAAGACTTTTAATTATAAGAAGAATCGTTGATAATGGAGCAGGAACTGGATGAACAGTTTACCCCCCCTTAGCAGCAAATATTGCCCATAGAGGTTCTTCTGTTGATTTAGCAATTTTTAGTCTTCACTTAGCTGGAATTTCTTCTATTTTAGGTGCTGTAAATTTTATTACAACTGTTATCAATATACGCCCCAAAGGAATAACTTTAGACCGAATACCCCTATTCGTTTGAGCAGTTAAAATTACAGCTATTCTACTCCTCTTATCTTTACCAGTTTTAGCAGGAGCAATTACTATATTACTAACTGACCGAAACTTAAATACATCATTTTTTGATCCAGCAGGTGGAGGAGACCCTATCCTTTATCAACATCTTTTT
>PSFOR088-13|BC-PNEF-PSFOR0060|Saperda scalaris|COI-5P
TACTTTATATTTTATTTTTGGTGCCTGAGCAGGAATAGTAGGAACATCCCTAAGTCTTCTAATCCGTTCAGAGTTGGGTACTCCAGGTTCCCTAATTGGAGATGACCAAATTTATAATGTTATTGTTACTGCTCATGCATTTATTATGATTTTTTTTATAGTTATACCTATTATAATTGGTGGATTTGGAAATTGACTAGTACCCCTAATACTAGGAGCCCCTGATATAGCATTTCCACGAATAAATAATATAAGATTCTGATTACTACCACCTGCTTTAAGACTTTTAATTATAAGAAGAATTGTTGATAAAGGAGCTGGAACTGGATGAACTGTTTACCCCCCCTTAGCTGCAAATGTAGCTCATAATGGTTCATCAGTGGATTTAGCAATTTTTAGTCTTCATTTAGCTGGAATTTCTTCAATTCTAGGAGCAGTGAATTTCATTACTACAGTAATTAACATACGCCCTAAAGGAATAACTTTAGATCGAATACCCCTATTCGTTTGAGCAGTTAAGATTACAGCCATTCTATTATTACTTTCATTACCAGTATTAGCTGGTGCAATTACCATACTTTTAACTGATCGAAACTTAAACACCTCTTTCTTTGACCCCGCAGGAGGAGGTGATCCTATTCTTTATCAGCATTTATTT
>PSFOR433-13|BC-PNEF-PSFOR0405|Saperda scalaris|COI-5P
TACTTTATATTTTATTTTTGGTGCCTGAGCAGGAATAGTAGGAACATCCCTAAGTCTTCTAATCCGTTCAGAATTGGGTACTCCAGGTTCCCTAATTGGAGATGACCAAATTTATAATGTTATTGTTACTGCCCATGCATTTATTATGATTTTTTTTATAGTTATACCTATTATAATCGGTGGATTTGGAAATTGACTAGTACCCCTAATACTAGGAGCCCCTGATATAGCATTTCCACGAATAAATAATATAAGATTCTGATTACTACCCCCTGCTTTAAGACTTTTAATTATAAGAAGAATTGTTGATAAAGGAGCTGGAACTGGATGAACTGTTTATCCCCCCTTAGCTGCAAATGTAGCTCATAATGGTTCATCAGTGGATTTAGCAATTTTTAGTCTTCATTTAGCTGGAATTTCTTCAATTCTAGGAGCAGTAAATTTCATTACTACAGTAATTAACATGCGTCCTAAAGGAATAACTTTAGATCGAATACCCCTATTCGTTTGAGCAGTTAAGATTACAGCCATTCTATTATTACTTTCATTACCAGTATTAGCTGGTGCAATTACTATACTTTTAACTGATCGAAACTTAAACACCTCTTTCTTTGACCCCGCAGGAGGAGGTGATCCTATTCTTTACCAACACTTATTT
>PSFOR200-13|BC-PNEF-PSFOR0172|Scaphidema metallicum|COI-5P
AACCCTATACTTCATCTTCGGAGCATGATCTGGAATAATTGGAACAGCCTTAAGACTATTAATTCGAGCCGAACTAGGAACCCCTAACGCCCTAATTGGAGATGATCAAATCTATAATGTTATTGTCACCGCCCATGCTTTCATCATAATTTTTTTTATAGTTATACCCATTATAATAGGAGGGTTTGGCAACTGACTGGTACCTCTTATACTAGGAGCCCCTGATATAGCATTCCCCCGAATAAACAACATAAGATTTTGGCTTTTACCCCCATCCCTTACCCTCCTTCTAATAAGAAGAATTGTAGAAAGAGGTGCAGGCACCGGATGAACAGTGTACCCCCCACTCTCATCTAACATTGCCCATAGTGGTTCTTCAGTAGACCTAGCAATTTTTAGTCTTCATCTAGCAGGAATCTCCTCAATTCTAGGAGCAGTCAACTTCATTACCACAGTAATCAATATACGACCAATAGGAATATCATTTGATCGAATGCCCCTATTTGTATGATCAGTATCAATCACTGCAATCTTATTACTTTTGTCTTTACCCGTACTAGCAGGTGCCATTACAATACTTTTAACCGACCGAAACATTAACACATCCTTCTTTGACCCCGCAGGGGGGGGTGACCCAATCCTTTACCAACATTTATTC
>PSFOR862-14|BC-PASSIFOR0080|Schizotus pectinicornis|COI-5P
----------------------------------------GGAACTTCAATAAGATTATTAATTCGTACAGAATTAGGAAATTCAGGATCTTTAATTGGAGATGATCAAATTTATAATGTTATTGTTACTGCTCATGCATTTATTATAATTTTTTTTATAGTTATACCAATTATAATTGGTGGATTTGGAAATTGATTAGTTCCTTTAATATTAGGAGCCCCTGATATAGCTTTTCCTCGTATAAATAATATAAGATTTTGACTTTTACCTCCTTCTTTAACATTGTTAATTATAAGAAGAATTGTAGAAAATGGAGCAGGTACTGGATGAACAGTTTATCCCCCTCTTTCATCTAATATTGCACATAGTGGTTCTTCTGTAGATTTAGCAATTTTTAGATTACATTTAGCAGGAATTTCTTCAATTTTAGGTGCAGTTAATTTTATTACTACAGTAATTAATATACGTCCAATTCAAATAACATTAGATAAAATACCTTTATTTGTTTGAGCTGTTGTAATTACTGCTGTTTTATTACTTCTTTCTCTTCCAGTATTAGCAGGTGCTATTACTATATTATTGACTGATCGAAATTTAAATACAACTTTTTTTGATCCTATTGGAGGTGGAGATCCTATTTTATATCAACATTTATTT
>PSFOR001-13|BC-PASSIFOR0001|Schizotus pectinicornis|COI-5P
AACTTTATATTTTATTTTAGGAAGATGAGCAGGAATAATTGGAACTTCAATAAGATTATTGATTCGTACAGAATTAGGAAATTCAGGATCTTTAATTGGAGATGATCAAATTTATAATGTTATTGTTACTGCTCATGCATTTATTATAATTTTTTTTATAGTTATACCAATTATAATTGGTGGATTTGGAAATTGATTAGTTCCTTTAATATTAGGAGCCCCTGATATAGCTTTTCCTCGTATAAATAATATAAGATTTTGACTTTTACCTCCTTCTTTAACATTGTTAATTATAAGAAAAATTGTAGAAAATGGAGCAGGTACTGGATGAACAGTTTATCCCCCTCTTTCATCTAATATTGCACATAGTGGTTCTTCTGTAGATTTAGCAATTTTTAGATTACATTTAGCAGGAATTTCTTCAATTTTAGGTGCAGTTAATTTTATTACTACAGTAATTAATATACGTCCAATTCAAATAACATTAGATAAAATACCTTTATTTGTTTGAGCTGTTGTAATTACTGCTGTTTTATTACTTCTTTCTCTTCCAGTATTAGCAGGTGCTATTACTATATTATTGACTGATCGAAATTTAAATACAACTTTTTTTGATCCTATTGGAGGTGGAGATCCTATTTTATATCAACATTTATTT
>PSFOR313-13|BC-PNEF-PSFOR0285|Scobicia pustulata|COI-5P
[truncated: 70,228 more chars]
