# Supplementary material for: PASSIFOR: A reference library of DNA barcodes for French saproxylic beetles (Insecta, Coleoptera)
Source: Biodivers Data J. 2015 Mar 4;(3):e4078. doi: 10.3897/BDJ.3.e4078 (PMC4355675; doi:10.3897/BDJ.3.e4078)
Supplement: Supplementary material 4 — Pairwise K2P distances within species [file biodiversity_data_journal-3-e4078-s004.xls]

## Sheet: details_17-1.xls
Species	ProcessID	Species	ProcessID	Species	K2P
Agriotes pilosellus	PSFOR766-13	Agriotes pilosellus	PSFOR1052-14	Agriotes pilosellus	0.0
Alosterna tabacicolor	PSFOR448-13	Alosterna tabacicolor	PSFOR103-13	Alosterna tabacicolor	12.999606
Ampedus aurilegulus	PSFOR852-13	Ampedus aurilegulus	PSFOR721-13	Ampedus aurilegulus	1.1262152
Ampedus balteatus	PSFOR957-14	Ampedus balteatus	PSFOR722-13	Ampedus balteatus	0.30645275
Ampedus balteatus	PSFOR838-13	Ampedus balteatus	PSFOR722-13	Ampedus balteatus	0.15408272
Ampedus balteatus	PSFOR838-13	Ampedus balteatus	PSFOR957-14	Ampedus balteatus	0.4631416
Ampedus balteatus	PSFOR1056-14	Ampedus balteatus	PSFOR722-13	Ampedus balteatus	1.0793236
Ampedus balteatus	PSFOR1056-14	Ampedus balteatus	PSFOR957-14	Ampedus balteatus	1.3905631
Ampedus balteatus	PSFOR1056-14	Ampedus balteatus	PSFOR838-13	Ampedus balteatus	0.30834487
Ampedus brunnicornis	PSFOR737-13	Ampedus brunnicornis	PSFOR834-13	Ampedus brunnicornis	0.0
Ampedus cardinalis	PSFOR847-13	Ampedus cardinalis	PSFOR723-13	Ampedus cardinalis	0.46030214
Ampedus elongatulus	PSFOR933-14	Ampedus elongatulus	PSFOR827-13	Ampedus elongatulus	0.30786806
Ampedus elongatulus	PSFOR543-13	Ampedus elongatulus	PSFOR827-13	Ampedus elongatulus	1.511918
Ampedus elongatulus	PSFOR543-13	Ampedus elongatulus	PSFOR933-14	Ampedus elongatulus	0.75568116
Ampedus erythrogonus	PSFOR853-13	Ampedus erythrogonus	PSFOR854-13	Ampedus erythrogonus	0.16611364
Ampedus erythrogonus	PSFOR726-13	Ampedus erythrogonus	PSFOR854-13	Ampedus erythrogonus	0.30645275
Ampedus erythrogonus	PSFOR726-13	Ampedus erythrogonus	PSFOR853-13	Ampedus erythrogonus	0.16604486
Ampedus nemoralis	PSFOR528-13	Ampedus nemoralis	PSFOR932-14	Ampedus nemoralis	0.1536104
Ampedus nemoralis	PSFOR542-13	Ampedus nemoralis	PSFOR932-14	Ampedus nemoralis	0.15313807
Ampedus nemoralis	PSFOR542-13	Ampedus nemoralis	PSFOR528-13	Ampedus nemoralis	0.0
Ampedus nigerrimus	PSFOR855-13	Ampedus nigerrimus	PSFOR828-13	Ampedus nigerrimus	0.6146204
Ampedus nigerrimus	PSFOR338-13	Ampedus nigerrimus	PSFOR828-13	Ampedus nigerrimus	0.46030214
Ampedus nigerrimus	PSFOR338-13	Ampedus nigerrimus	PSFOR855-13	Ampedus nigerrimus	0.15313807
Ampedus nigerrimus	PSFOR851-13	Ampedus nigerrimus	PSFOR828-13	Ampedus nigerrimus	0.46030214
Ampedus nigerrimus	PSFOR851-13	Ampedus nigerrimus	PSFOR855-13	Ampedus nigerrimus	0.15313807
Ampedus nigerrimus	PSFOR851-13	Ampedus nigerrimus	PSFOR338-13	Ampedus nigerrimus	0.0
Ampedus nigrinus	PSFOR959-14	Ampedus nigrinus	PSFOR738-13	Ampedus nigrinus	0.7694224
Ampedus pomorum	PSFOR529-13	Ampedus pomorum	PSFOR550-13	Ampedus pomorum	0.0
Ampedus pomorum	PSFOR532-13	Ampedus pomorum	PSFOR550-13	Ampedus pomorum	3.0640435
Ampedus pomorum	PSFOR532-13	Ampedus pomorum	PSFOR529-13	Ampedus pomorum	2.4982033
Ampedus pomorum	PSFOR530-13	Ampedus pomorum	PSFOR550-13	Ampedus pomorum	0.0
Ampedus pomorum	PSFOR530-13	Ampedus pomorum	PSFOR529-13	Ampedus pomorum	0.0
Ampedus pomorum	PSFOR530-13	Ampedus pomorum	PSFOR532-13	Ampedus pomorum	3.0640435
Ampedus pomorum	PSFOR546-13	Ampedus pomorum	PSFOR550-13	Ampedus pomorum	0.50000274
Ampedus pomorum	PSFOR546-13	Ampedus pomorum	PSFOR529-13	Ampedus pomorum	0.3067496
Ampedus pomorum	PSFOR546-13	Ampedus pomorum	PSFOR532-13	Ampedus pomorum	2.819231
Ampedus pomorum	PSFOR546-13	Ampedus pomorum	PSFOR530-13	Ampedus pomorum	0.50000274
Ampedus pomorum	PSFOR547-13	Ampedus pomorum	PSFOR550-13	Ampedus pomorum	0.0
Ampedus pomorum	PSFOR547-13	Ampedus pomorum	PSFOR529-13	Ampedus pomorum	0.0
Ampedus pomorum	PSFOR547-13	Ampedus pomorum	PSFOR532-13	Ampedus pomorum	2.4982033
Ampedus pomorum	PSFOR547-13	Ampedus pomorum	PSFOR530-13	Ampedus pomorum	0.0
Ampedus pomorum	PSFOR547-13	Ampedus pomorum	PSFOR546-13	Ampedus pomorum	0.3067496
Ampedus pomorum	PSFOR548-13	Ampedus pomorum	PSFOR550-13	Ampedus pomorum	0.0
Ampedus pomorum	PSFOR548-13	Ampedus pomorum	PSFOR529-13	Ampedus pomorum	0.0
Ampedus pomorum	PSFOR548-13	Ampedus pomorum	PSFOR532-13	Ampedus pomorum	2.4982033
Ampedus pomorum	PSFOR548-13	Ampedus pomorum	PSFOR530-13	Ampedus pomorum	0.0
Ampedus pomorum	PSFOR548-13	Ampedus pomorum	PSFOR546-13	Ampedus pomorum	0.3067496
Ampedus pomorum	PSFOR548-13	Ampedus pomorum	PSFOR547-13	Ampedus pomorum	0.0
Ampedus pomorum	PSFOR544-13	Ampedus pomorum	PSFOR550-13	Ampedus pomorum	0.5319209
Ampedus pomorum	PSFOR544-13	Ampedus pomorum	PSFOR529-13	Ampedus pomorum	0.3184724
Ampedus pomorum	PSFOR544-13	Ampedus pomorum	PSFOR532-13	Ampedus pomorum	2.7621486
Ampedus pomorum	PSFOR544-13	Ampedus pomorum	PSFOR530-13	Ampedus pomorum	0.5319209
Ampedus pomorum	PSFOR544-13	Ampedus pomorum	PSFOR546-13	Ampedus pomorum	0.0
Ampedus pomorum	PSFOR544-13	Ampedus pomorum	PSFOR547-13	Ampedus pomorum	0.3184724
Ampedus pomorum	PSFOR544-13	Ampedus pomorum	PSFOR548-13	Ampedus pomorum	0.3184724
Ampedus praestus	PSFOR848-13	Ampedus praestus	PSFOR735-13	Ampedus praestus	0.15313807
Ampedus quercicola	PSFOR549-13	Ampedus quercicola	PSFOR842-13	Ampedus quercicola	1.5512146
Ampedus quercicola	PSFOR1002-14	Ampedus quercicola	PSFOR842-13	Ampedus quercicola	0.15847738
Ampedus quercicola	PSFOR1002-14	Ampedus quercicola	PSFOR549-13	Ampedus quercicola	1.4402875
Ampedus quercicola	PSFOR539-13	Ampedus quercicola	PSFOR842-13	Ampedus quercicola	0.25316387
Ampedus quercicola	PSFOR539-13	Ampedus quercicola	PSFOR549-13	Ampedus quercicola	1.2710154
Ampedus quercicola	PSFOR539-13	Ampedus quercicola	PSFOR1002-14	Ampedus quercicola	0.26666877
Ampedus quercicola	PSFOR1004-14	Ampedus quercicola	PSFOR842-13	Ampedus quercicola	0.15337422
Ampedus quercicola	PSFOR1004-14	Ampedus quercicola	PSFOR549-13	Ampedus quercicola	1.7062932
Ampedus quercicola	PSFOR1004-14	Ampedus quercicola	PSFOR1002-14	Ampedus quercicola	0.0
Ampedus quercicola	PSFOR1004-14	Ampedus quercicola	PSFOR539-13	Ampedus quercicola	0.50633353
Ampedus quercicola	PSFOR540-13	Ampedus quercicola	PSFOR842-13	Ampedus quercicola	0.0
Ampedus quercicola	PSFOR540-13	Ampedus quercicola	PSFOR549-13	Ampedus quercicola	1.5488137
Ampedus quercicola	PSFOR540-13	Ampedus quercicola	PSFOR1002-14	Ampedus quercicola	0.15822923
Ampedus quercicola	PSFOR540-13	Ampedus quercicola	PSFOR539-13	Ampedus quercicola	0.25252587
Ampedus quercicola	PSFOR540-13	Ampedus quercicola	PSFOR1004-14	Ampedus quercicola	0.15313807
Ampedus quercicola	PSFOR843-13	Ampedus quercicola	PSFOR842-13	Ampedus quercicola	1.2007425
Ampedus quercicola	PSFOR843-13	Ampedus quercicola	PSFOR549-13	Ampedus quercicola	0.0
Ampedus quercicola	PSFOR843-13	Ampedus quercicola	PSFOR1002-14	Ampedus quercicola	1.3723004
Ampedus quercicola	PSFOR843-13	Ampedus quercicola	PSFOR539-13	Ampedus quercicola	0.9063689
Ampedus quercicola	PSFOR843-13	Ampedus quercicola	PSFOR1004-14	Ampedus quercicola	1.3723004
Ampedus quercicola	PSFOR843-13	Ampedus quercicola	PSFOR540-13	Ampedus quercicola	1.198688
Ampedus quercicola	PSFOR541-13	Ampedus quercicola	PSFOR842-13	Ampedus quercicola	0.0
Ampedus quercicola	PSFOR541-13	Ampedus quercicola	PSFOR549-13	Ampedus quercicola	1.5488137
Ampedus quercicola	PSFOR541-13	Ampedus quercicola	PSFOR1002-14	Ampedus quercicola	0.15822923
Ampedus quercicola	PSFOR541-13	Ampedus quercicola	PSFOR539-13	Ampedus quercicola	0.25252587
Ampedus quercicola	PSFOR541-13	Ampedus quercicola	PSFOR1004-14	Ampedus quercicola	0.15313807
Ampedus quercicola	PSFOR541-13	Ampedus quercicola	PSFOR540-13	Ampedus quercicola	0.0
Ampedus quercicola	PSFOR541-13	Ampedus quercicola	PSFOR843-13	Ampedus quercicola	1.198688
Ampedus quercicola	PSFOR538-13	Ampedus quercicola	PSFOR842-13	Ampedus quercicola	0.0
Ampedus quercicola	PSFOR538-13	Ampedus quercicola	PSFOR549-13	Ampedus quercicola	1.1031402
Ampedus quercicola	PSFOR538-13	Ampedus quercicola	PSFOR1002-14	Ampedus quercicola	0.1587315
Ampedus quercicola	PSFOR538-13	Ampedus quercicola	PSFOR539-13	Ampedus quercicola	0.0
Ampedus quercicola	PSFOR538-13	Ampedus quercicola	PSFOR1004-14	Ampedus quercicola	0.15649524
Ampedus quercicola	PSFOR538-13	Ampedus quercicola	PSFOR540-13	Ampedus quercicola	0.0
Ampedus quercicola	PSFOR538-13	Ampedus quercicola	PSFOR843-13	Ampedus quercicola	0.8561841
Ampedus quercicola	PSFOR538-13	Ampedus quercicola	PSFOR541-13	Ampedus quercicola	0.0
Ampedus quercicola	PSFOR1006-14	Ampedus quercicola	PSFOR842-13	Ampedus quercicola	0.15337422
Ampedus quercicola	PSFOR1006-14	Ampedus quercicola	PSFOR549-13	Ampedus quercicola	1.7062932
Ampedus quercicola	PSFOR1006-14	Ampedus quercicola	PSFOR1002-14	Ampedus quercicola	0.31695777
Ampedus quercicola	PSFOR1006-14	Ampedus quercicola	PSFOR539-13	Ampedus quercicola	0.25252587
Ampedus quercicola	PSFOR1006-14	Ampedus quercicola	PSFOR1004-14	Ampedus quercicola	0.3067496
Ampedus quercicola	PSFOR1006-14	Ampedus quercicola	PSFOR540-13	Ampedus quercicola	0.15313807
Ampedus quercicola	PSFOR1006-14	Ampedus quercicola	PSFOR843-13	Ampedus quercicola	1.3723004
Ampedus quercicola	PSFOR1006-14	Ampedus quercicola	PSFOR541-13	Ampedus quercicola	0.15313807
Ampedus quercicola	PSFOR1006-14	Ampedus quercicola	PSFOR538-13	Ampedus quercicola	0.15649524
Ampedus quercicola	PSFOR1005-14	Ampedus quercicola	PSFOR842-13	Ampedus quercicola	0.15337422
Ampedus quercicola	PSFOR1005-14	Ampedus quercicola	PSFOR549-13	Ampedus quercicola	1.7062932
Ampedus quercicola	PSFOR1005-14	Ampedus quercicola	PSFOR1002-14	Ampedus quercicola	0.0
Ampedus quercicola	PSFOR1005-14	Ampedus quercicola	PSFOR539-13	Ampedus quercicola	0.50633353
Ampedus quercicola	PSFOR1005-14	Ampedus quercicola	PSFOR1004-14	Ampedus quercicola	0.0
Ampedus quercicola	PSFOR1005-14	Ampedus quercicola	PSFOR540-13	Ampedus quercicola	0.15313807
Ampedus quercicola	PSFOR1005-14	Ampedus quercicola	PSFOR843-13	Ampedus quercicola	1.3723004
Ampedus quercicola	PSFOR1005-14	Ampedus quercicola	PSFOR541-13	Ampedus quercicola	0.15313807
Ampedus quercicola	PSFOR1005-14	Ampedus quercicola	PSFOR538-13	Ampedus quercicola	0.15649524
Ampedus quercicola	PSFOR1005-14	Ampedus quercicola	PSFOR1006-14	Ampedus quercicola	0.3067496
Ampedus quercicola	PSFOR841-13	Ampedus quercicola	PSFOR842-13	Ampedus quercicola	1.7232254
Ampedus quercicola	PSFOR841-13	Ampedus quercicola	PSFOR549-13	Ampedus quercicola	0.15450124
Ampedus quercicola	PSFOR841-13	Ampedus quercicola	PSFOR1002-14	Ampedus quercicola	1.6164165
Ampedus quercicola	PSFOR841-13	Ampedus quercicola	PSFOR539-13	Ampedus quercicola	1.2710154
Ampedus quercicola	PSFOR841-13	Ampedus quercicola	PSFOR1004-14	Ampedus quercicola	1.8797677
Ampedus quercicola	PSFOR841-13	Ampedus quercicola	PSFOR540-13	Ampedus quercicola	1.7205294
Ampedus quercicola	PSFOR841-13	Ampedus quercicola	PSFOR843-13	Ampedus quercicola	0.17116126
Ampedus quercicola	PSFOR841-13	Ampedus quercicola	PSFOR541-13	Ampedus quercicola	1.7205294
Ampedus quercicola	PSFOR841-13	Ampedus quercicola	PSFOR538-13	Ampedus quercicola	1.273611
Ampedus quercicola	PSFOR841-13	Ampedus quercicola	PSFOR1006-14	Ampedus quercicola	1.8797677
Ampedus quercicola	PSFOR841-13	Ampedus quercicola	PSFOR1005-14	Ampedus quercicola	1.8797677
Ampedus quercicola	PSFOR937-14	Ampedus quercicola	PSFOR842-13	Ampedus quercicola	1.4286698
Ampedus quercicola	PSFOR937-14	Ampedus quercicola	PSFOR549-13	Ampedus quercicola	0.0
Ampedus quercicola	PSFOR937-14	Ampedus quercicola	PSFOR1002-14	Ampedus quercicola	1.6327981
Ampedus quercicola	PSFOR937-14	Ampedus quercicola	PSFOR539-13	Ampedus quercicola	0.94046676
Ampedus quercicola	PSFOR937-14	Ampedus quercicola	PSFOR1004-14	Ampedus quercicola	1.6327981
Ampedus quercicola	PSFOR937-14	Ampedus quercicola	PSFOR540-13	Ampedus quercicola	1.4257596
Ampedus quercicola	PSFOR937-14	Ampedus quercicola	PSFOR843-13	Ampedus quercicola	0.0
Ampedus quercicola	PSFOR937-14	Ampedus quercicola	PSFOR541-13	Ampedus quercicola	1.4257596
Ampedus quercicola	PSFOR937-14	Ampedus quercicola	PSFOR538-13	Ampedus quercicola	1.0183642
Ampedus quercicola	PSFOR937-14	Ampedus quercicola	PSFOR1006-14	Ampedus quercicola	1.4257596
Ampedus quercicola	PSFOR937-14	Ampedus quercicola	PSFOR1005-14	Ampedus quercicola	1.6327981
Ampedus quercicola	PSFOR937-14	Ampedus quercicola	PSFOR841-13	Ampedus quercicola	0.20110466
Ampedus rufipennis	PSFOR962-14	Ampedus rufipennis	PSFOR840-13	Ampedus rufipennis	0.0
Ampedus rufipennis	PSFOR832-13	Ampedus rufipennis	PSFOR840-13	Ampedus rufipennis	1.0528977
Ampedus rufipennis	PSFOR832-13	Ampedus rufipennis	PSFOR962-14	Ampedus rufipennis	1.0528977
Ampedus rufipennis	PSFOR339-13	Ampedus rufipennis	PSFOR840-13	Ampedus rufipennis	0.0
Ampedus rufipennis	PSFOR339-13	Ampedus rufipennis	PSFOR962-14	Ampedus rufipennis	0.0
Ampedus rufipennis	PSFOR339-13	Ampedus rufipennis	PSFOR832-13	Ampedus rufipennis	1.2376872
Ampedus rufipennis	PSFOR941-14	Ampedus rufipennis	PSFOR840-13	Ampedus rufipennis	0.77043015
Ampedus rufipennis	PSFOR941-14	Ampedus rufipennis	PSFOR962-14	Ampedus rufipennis	0.77043015
Ampedus rufipennis	PSFOR941-14	Ampedus rufipennis	PSFOR832-13	Ampedus rufipennis	1.230518
Ampedus rufipennis	PSFOR941-14	Ampedus rufipennis	PSFOR339-13	Ampedus rufipennis	0.98525256
Ampedus rufipennis	PSFOR833-13	Ampedus rufipennis	PSFOR840-13	Ampedus rufipennis	0.0
Ampedus rufipennis	PSFOR833-13	Ampedus rufipennis	PSFOR962-14	Ampedus rufipennis	0.0
Ampedus rufipennis	PSFOR833-13	Ampedus rufipennis	PSFOR832-13	Ampedus rufipennis	1.0528977
Ampedus rufipennis	PSFOR833-13	Ampedus rufipennis	PSFOR339-13	Ampedus rufipennis	0.0
Ampedus rufipennis	PSFOR833-13	Ampedus rufipennis	PSFOR941-14	Ampedus rufipennis	0.77043015
Ampedus sanguineus	PSFOR844-13	Ampedus sanguineus	PSFOR1057-14	Ampedus sanguineus	0.46030214
Ampedus sanguineus	PSFOR1003-14	Ampedus sanguineus	PSFOR1057-14	Ampedus sanguineus	0.0
Ampedus sanguineus	PSFOR1003-14	Ampedus sanguineus	PSFOR844-13	Ampedus sanguineus	0.46030214
Ampedus sanguineus	PSFOR845-13	Ampedus sanguineus	PSFOR1057-14	Ampedus sanguineus	0.0
Ampedus sanguineus	PSFOR845-13	Ampedus sanguineus	PSFOR844-13	Ampedus sanguineus	0.46030214
Ampedus sanguineus	PSFOR845-13	Ampedus sanguineus	PSFOR1003-14	Ampedus sanguineus	0.0
Ampedus scrofa	PSFOR521-13	Ampedus scrofa	PSFOR507-13	Ampedus scrofa	0.614207
Ampedus scrofa	PSFOR819-13	Ampedus scrofa	PSFOR507-13	Ampedus scrofa	1.0793236
Ampedus scrofa	PSFOR819-13	Ampedus scrofa	PSFOR521-13	Ampedus scrofa	1.3896561
Ampedus scrofa	PSFOR516-13	Ampedus scrofa	PSFOR507-13	Ampedus scrofa	0.7500054
Ampedus scrofa	PSFOR516-13	Ampedus scrofa	PSFOR521-13	Ampedus scrofa	0.24937788
Ampedus scrofa	PSFOR516-13	Ampedus scrofa	PSFOR819-13	Ampedus scrofa	1.7631733
Ampedus scrofa	PSFOR518-13	Ampedus scrofa	PSFOR507-13	Ampedus scrofa	0.0
Ampedus scrofa	PSFOR518-13	Ampedus scrofa	PSFOR521-13	Ampedus scrofa	0.5145802
Ampedus scrofa	PSFOR518-13	Ampedus scrofa	PSFOR819-13	Ampedus scrofa	0.86000425
Ampedus scrofa	PSFOR518-13	Ampedus scrofa	PSFOR516-13	Ampedus scrofa	0.5532542
Ampedus scrofa	PSFOR522-13	Ampedus scrofa	PSFOR507-13	Ampedus scrofa	0.614207
Ampedus scrofa	PSFOR522-13	Ampedus scrofa	PSFOR521-13	Ampedus scrofa	0.0
Ampedus scrofa	PSFOR522-13	Ampedus scrofa	PSFOR819-13	Ampedus scrofa	1.3896561
Ampedus scrofa	PSFOR522-13	Ampedus scrofa	PSFOR516-13	Ampedus scrofa	0.24937788
Ampedus scrofa	PSFOR522-13	Ampedus scrofa	PSFOR518-13	Ampedus scrofa	0.5145802
Ampedus scrofa	PSFOR512-13	Ampedus scrofa	PSFOR507-13	Ampedus scrofa	0.49937963
Ampedus scrofa	PSFOR512-13	Ampedus scrofa	PSFOR521-13	Ampedus scrofa	0.0
Ampedus scrofa	PSFOR512-13	Ampedus scrofa	PSFOR819-13	Ampedus scrofa	1.5080692
Ampedus scrofa	PSFOR512-13	Ampedus scrofa	PSFOR516-13	Ampedus scrofa	0.24937788
Ampedus scrofa	PSFOR512-13	Ampedus scrofa	PSFOR518-13	Ampedus scrofa	0.5532542
Ampedus scrofa	PSFOR512-13	Ampedus scrofa	PSFOR522-13	Ampedus scrofa	0.0
Ampedus scrofa	PSFOR520-13	Ampedus scrofa	PSFOR507-13	Ampedus scrofa	0.50000274
Ampedus scrofa	PSFOR520-13	Ampedus scrofa	PSFOR521-13	Ampedus scrofa	0.7500054
Ampedus scrofa	PSFOR520-13	Ampedus scrofa	PSFOR819-13	Ampedus scrofa	1.511918
Ampedus scrofa	PSFOR520-13	Ampedus scrofa	PSFOR516-13	Ampedus scrofa	1.0018939
Ampedus scrofa	PSFOR520-13	Ampedus scrofa	PSFOR518-13	Ampedus scrofa	0.55402255
Ampedus scrofa	PSFOR520-13	Ampedus scrofa	PSFOR522-13	Ampedus scrofa	0.7500054
Ampedus scrofa	PSFOR520-13	Ampedus scrofa	PSFOR512-13	Ampedus scrofa	0.7500054
Ampedus scrofa	PSFOR524-13	Ampedus scrofa	PSFOR507-13	Ampedus scrofa	0.4992231
Ampedus scrofa	PSFOR524-13	Ampedus scrofa	PSFOR521-13	Ampedus scrofa	0.4992231
Ampedus scrofa	PSFOR524-13	Ampedus scrofa	PSFOR819-13	Ampedus scrofa	1.5095128
Ampedus scrofa	PSFOR524-13	Ampedus scrofa	PSFOR516-13	Ampedus scrofa	0.2492221
Ampedus scrofa	PSFOR524-13	Ampedus scrofa	PSFOR518-13	Ampedus scrofa	0.27605364
Ampedus scrofa	PSFOR524-13	Ampedus scrofa	PSFOR522-13	Ampedus scrofa	0.4992231
Ampedus scrofa	PSFOR524-13	Ampedus scrofa	PSFOR512-13	Ampedus scrofa	0.4992231
Ampedus scrofa	PSFOR524-13	Ampedus scrofa	PSFOR520-13	Ampedus scrofa	0.7504774
Ampedus scrofa	PSFOR508-13	Ampedus scrofa	PSFOR507-13	Ampedus scrofa	0.0
Ampedus scrofa	PSFOR508-13	Ampedus scrofa	PSFOR521-13	Ampedus scrofa	0.614207
Ampedus scrofa	PSFOR508-13	Ampedus scrofa	PSFOR819-13	Ampedus scrofa	1.0793236
Ampedus scrofa	PSFOR508-13	Ampedus scrofa	PSFOR516-13	Ampedus scrofa	0.7500054
Ampedus scrofa	PSFOR508-13	Ampedus scrofa	PSFOR518-13	Ampedus scrofa	0.0
Ampedus scrofa	PSFOR508-13	Ampedus scrofa	PSFOR522-13	Ampedus scrofa	0.614207
Ampedus scrofa	PSFOR508-13	Ampedus scrofa	PSFOR512-13	Ampedus scrofa	0.49937963
Ampedus scrofa	PSFOR508-13	Ampedus scrofa	PSFOR520-13	Ampedus scrofa	0.50000274
Ampedus scrofa	PSFOR508-13	Ampedus scrofa	PSFOR524-13	Ampedus scrofa	0.4992231
Ampedus scrofa	PSFOR517-13	Ampedus scrofa	PSFOR507-13	Ampedus scrofa	0.7500054
Ampedus scrofa	PSFOR517-13	Ampedus scrofa	PSFOR521-13	Ampedus scrofa	0.24937788
Ampedus scrofa	PSFOR517-13	Ampedus scrofa	PSFOR819-13	Ampedus scrofa	1.7631733
Ampedus scrofa	PSFOR517-13	Ampedus scrofa	PSFOR516-13	Ampedus scrofa	0.0
Ampedus scrofa	PSFOR517-13	Ampedus scrofa	PSFOR518-13	Ampedus scrofa	0.5532542
Ampedus scrofa	PSFOR517-13	Ampedus scrofa	PSFOR522-13	Ampedus scrofa	0.24937788
Ampedus scrofa	PSFOR517-13	Ampedus scrofa	PSFOR512-13	Ampedus scrofa	0.24937788
Ampedus scrofa	PSFOR517-13	Ampedus scrofa	PSFOR520-13	Ampedus scrofa	1.0018939
Ampedus scrofa	PSFOR517-13	Ampedus scrofa	PSFOR524-13	Ampedus scrofa	0.2492221
Ampedus scrofa	PSFOR517-13	Ampedus scrofa	PSFOR508-13	Ampedus scrofa	0.7500054
Ampedus scrofa	PSFOR510-13	Ampedus scrofa	PSFOR507-13	Ampedus scrofa	0.614207
Ampedus scrofa	PSFOR510-13	Ampedus scrofa	PSFOR521-13	Ampedus scrofa	0.0
Ampedus scrofa	PSFOR510-13	Ampedus scrofa	PSFOR819-13	Ampedus scrofa	1.3896561
Ampedus scrofa	PSFOR510-13	Ampedus scrofa	PSFOR516-13	Ampedus scrofa	0.24937788
Ampedus scrofa	PSFOR510-13	Ampedus scrofa	PSFOR518-13	Ampedus scrofa	0.5145802
Ampedus scrofa	PSFOR510-13	Ampedus scrofa	PSFOR522-13	Ampedus scrofa	0.0
Ampedus scrofa	PSFOR510-13	Ampedus scrofa	PSFOR512-13	Ampedus scrofa	0.0
Ampedus scrofa	PSFOR510-13	Ampedus scrofa	PSFOR520-13	Ampedus scrofa	0.7500054
Ampedus scrofa	PSFOR510-13	Ampedus scrofa	PSFOR524-13	Ampedus scrofa	0.4992231
Ampedus scrofa	PSFOR510-13	Ampedus scrofa	PSFOR508-13	Ampedus scrofa	0.614207
Ampedus scrofa	PSFOR510-13	Ampedus scrofa	PSFOR517-13	Ampedus scrofa	0.24937788
Ampedus scrofa	PSFOR503-13	Ampedus scrofa	PSFOR507-13	Ampedus scrofa	0.614207
Ampedus scrofa	PSFOR503-13	Ampedus scrofa	PSFOR521-13	Ampedus scrofa	0.0
Ampedus scrofa	PSFOR503-13	Ampedus scrofa	PSFOR819-13	Ampedus scrofa	1.3896561
Ampedus scrofa	PSFOR503-13	Ampedus scrofa	PSFOR516-13	Ampedus scrofa	0.24937788
Ampedus scrofa	PSFOR503-13	Ampedus scrofa	PSFOR518-13	Ampedus scrofa	0.5145802
Ampedus scrofa	PSFOR503-13	Ampedus scrofa	PSFOR522-13	Ampedus scrofa	0.0
Ampedus scrofa	PSFOR503-13	Ampedus scrofa	PSFOR512-13	Ampedus scrofa	0.0
Ampedus scrofa	PSFOR503-13	Ampedus scrofa	PSFOR520-13	Ampedus scrofa	0.7500054
Ampedus scrofa	PSFOR503-13	Ampedus scrofa	PSFOR524-13	Ampedus scrofa	0.4992231
Ampedus scrofa	PSFOR503-13	Ampedus scrofa	PSFOR508-13	Ampedus scrofa	0.614207
Ampedus scrofa	PSFOR503-13	Ampedus scrofa	PSFOR517-13	Ampedus scrofa	0.24937788
Ampedus scrofa	PSFOR503-13	Ampedus scrofa	PSFOR510-13	Ampedus scrofa	0.0
Ampedus scrofa	PSFOR519-13	Ampedus scrofa	PSFOR507-13	Ampedus scrofa	0.614207
Ampedus scrofa	PSFOR519-13	Ampedus scrofa	PSFOR521-13	Ampedus scrofa	0.0
Ampedus scrofa	PSFOR519-13	Ampedus scrofa	PSFOR819-13	Ampedus scrofa	1.3896561
Ampedus scrofa	PSFOR519-13	Ampedus scrofa	PSFOR516-13	Ampedus scrofa	0.24937788
Ampedus scrofa	PSFOR519-13	Ampedus scrofa	PSFOR518-13	Ampedus scrofa	0.5145802
Ampedus scrofa	PSFOR519-13	Ampedus scrofa	PSFOR522-13	Ampedus scrofa	0.0
Ampedus scrofa	PSFOR519-13	Ampedus scrofa	PSFOR512-13	Ampedus scrofa	0.0
Ampedus scrofa	PSFOR519-13	Ampedus scrofa	PSFOR520-13	Ampedus scrofa	0.7500054
Ampedus scrofa	PSFOR519-13	Ampedus scrofa	PSFOR524-13	Ampedus scrofa	0.4992231
Ampedus scrofa	PSFOR519-13	Ampedus scrofa	PSFOR508-13	Ampedus scrofa	0.614207
Ampedus scrofa	PSFOR519-13	Ampedus scrofa	PSFOR517-13	Ampedus scrofa	0.24937788
Ampedus scrofa	PSFOR519-13	Ampedus scrofa	PSFOR510-13	Ampedus scrofa	0.0
Ampedus scrofa	PSFOR519-13	Ampedus scrofa	PSFOR503-13	Ampedus scrofa	0.0
Anaglyptus mysticus	PSFOR018-13	Anaglyptus mysticus	PSFOR034-13	Anaglyptus mysticus	0.0
Anaglyptus mysticus	PSFOR026-13	Anaglyptus mysticus	PSFOR034-13	Anaglyptus mysticus	0.0
Anaglyptus mysticus	PSFOR026-13	Anaglyptus mysticus	PSFOR018-13	Anaglyptus mysticus	0.0
Anaglyptus mysticus	PSFOR035-13	Anaglyptus mysticus	PSFOR034-13	Anaglyptus mysticus	0.0
Anaglyptus mysticus	PSFOR035-13	Anaglyptus mysticus	PSFOR018-13	Anaglyptus mysticus	0.0
Anaglyptus mysticus	PSFOR035-13	Anaglyptus mysticus	PSFOR026-13	Anaglyptus mysticus	0.0
Anaglyptus mysticus	PSFOR441-13	Anaglyptus mysticus	PSFOR034-13	Anaglyptus mysticus	0.15313807
Anaglyptus mysticus	PSFOR441-13	Anaglyptus mysticus	PSFOR018-13	Anaglyptus mysticus	0.15313807
Anaglyptus mysticus	PSFOR441-13	Anaglyptus mysticus	PSFOR026-13	Anaglyptus mysticus	0.15313807
Anaglyptus mysticus	PSFOR441-13	Anaglyptus mysticus	PSFOR035-13	Anaglyptus mysticus	0.15313807
Anastrangalia dubia	PSFOR101-13	Anastrangalia dubia	PSFOR102-13	Anastrangalia dubia	0.0
Anastrangalia dubia	PSFOR864-14	Anastrangalia dubia	PSFOR102-13	Anastrangalia dubia	0.0
Anastrangalia dubia	PSFOR864-14	Anastrangalia dubia	PSFOR101-13	Anastrangalia dubia	0.15313807
Anisotoma humeralis	PSFOR297-13	Anisotoma humeralis	PSFOR871-14	Anisotoma humeralis	0.16528836
Asemum striatum	PSFOR041-13	Asemum striatum	PSFOR040-13	Asemum striatum	0.15313807
Athous vittatus	PSFOR1054-14	Athous vittatus	PSFOR978-14	Athous vittatus	0.16611364
Biphyllus lunatus	PSFOR607-13	Biphyllus lunatus	PSFOR1007-14	Biphyllus lunatus	1.8642701
Bolitophagus reticulatus	PSFOR191-13	Bolitophagus reticulatus	PSFOR1033-14	Bolitophagus reticulatus	1.0781269
Brachygonus ruficeps	PSFOR971-14	Brachygonus ruficeps	PSFOR814-13	Brachygonus ruficeps	0.0
Calambus bipustulatus	PSFOR465-13	Calambus bipustulatus	PSFOR999-14	Calambus bipustulatus	0.0
Callidium aeneum	PSFOR042-13	Callidium aeneum	PSFOR429-13	Callidium aeneum	0.48077437
Callidium aeneum	PSFOR901-14	Callidium aeneum	PSFOR429-13	Callidium aeneum	0.0
Callidium aeneum	PSFOR901-14	Callidium aeneum	PSFOR042-13	Callidium aeneum	0.4608315
Cerambyx cerdo	PSFOR095-13	Cerambyx cerdo	PSFOR044-13	Cerambyx cerdo	0.3184724
Cerambyx scopolii	PSFOR439-13	Cerambyx scopolii	PSFOR023-13	Cerambyx scopolii	0.61539274
Cerambyx scopolii	PSFOR045-13	Cerambyx scopolii	PSFOR023-13	Cerambyx scopolii	0.77043015
Cerambyx scopolii	PSFOR045-13	Cerambyx scopolii	PSFOR439-13	Cerambyx scopolii	0.15313807
Cetonia aurata	PSFOR238-13	Cetonia aurata	PSFOR478-13	Cetonia aurata	0.4608315
Clytus arietis	PSFOR436-13	Clytus arietis	PSFOR890-14	Clytus arietis	0.15313807
Conopalpus testaceus	PSFOR863-14	Conopalpus testaceus	PSFOR367-13	Conopalpus testaceus	0.0
Corticeus pini	PSFOR233-13	Corticeus pini	PSFOR232-13	Corticeus pini	0.3067496
Corticeus unicolor	PSFOR393-13	Corticeus unicolor	PSFOR204-13	Corticeus unicolor	0.0
Cortodera humeralis	PSFOR446-13	Cortodera humeralis	PSFOR025-13	Cortodera humeralis	0.46030214
Cortodera humeralis	PSFOR121-13	Cortodera humeralis	PSFOR025-13	Cortodera humeralis	0.15313807
Cortodera humeralis	PSFOR121-13	Cortodera humeralis	PSFOR446-13	Cortodera humeralis	0.6146204
Coxelus pictus	PSFOR002-13	Coxelus pictus	PSFOR330-13	Coxelus pictus	2.9843159
Cryptarcha strigata	PSFOR286-13	Cryptarcha strigata	PSFOR1025-14	Cryptarcha strigata	2.1728265
Cteniopus sulphureus	PSFOR195-13	Cteniopus sulphureus	PSFOR196-13	Cteniopus sulphureus	0.0
Danosoma fasciata	PSFOR969-14	Danosoma fasciata	PSFOR747-13	Danosoma fasciata	0.0
Denticollis linearis	PSFOR865-14	Denticollis linearis	PSFOR748-13	Denticollis linearis	2.8474815
Denticollis linearis	PSFOR979-14	Denticollis linearis	PSFOR748-13	Denticollis linearis	0.0
Denticollis linearis	PSFOR979-14	Denticollis linearis	PSFOR865-14	Denticollis linearis	2.8474815
Denticollis rubens	PSFOR870-14	Denticollis rubens	PSFOR749-13	Denticollis rubens	0.0
Denticollis rubens	PSFOR340-13	Denticollis rubens	PSFOR749-13	Denticollis rubens	0.0
Denticollis rubens	PSFOR340-13	Denticollis rubens	PSFOR870-14	Denticollis rubens	0.0
Diaperis boleti	PSFOR198-13	Diaperis boleti	PSFOR1034-14	Diaperis boleti	0.15313807
Dorcus parallelipipedus	PSFOR256-13	Dorcus parallelipipedus	PSFOR1018-14	Dorcus parallelipipedus	0.0
Dryocoetes villosus	PSFOR411-13	Dryocoetes villosus	PSFOR405-13	Dryocoetes villosus	1.7164117
Elateroides dermestoides	PSFOR283-13	Elateroides dermestoides	PSFOR1020-14	Elateroides dermestoides	0.0
Endomychus coccineus	PSFOR1063-14	Endomychus coccineus	PSFOR861-14	Endomychus coccineus	0.1567404
Ernoporicus fagi	PSFOR407-13	Ernoporicus fagi	PSFOR426-13	Ernoporicus fagi	0.0
Ernoporicus fagi	PSFOR427-13	Ernoporicus fagi	PSFOR426-13	Ernoporicus fagi	0.0
Ernoporicus fagi	PSFOR427-13	Ernoporicus fagi	PSFOR407-13	Ernoporicus fagi	0.0
Eulagius filicornis	PSFOR349-13	Eulagius filicornis	PSFOR356-13	Eulagius filicornis	0.0
Eulagius filicornis	PSFOR350-13	Eulagius filicornis	PSFOR356-13	Eulagius filicornis	0.0
Eulagius filicornis	PSFOR350-13	Eulagius filicornis	PSFOR349-13	Eulagius filicornis	0.0
Eulagius filicornis	PSFOR1019-14	Eulagius filicornis	PSFOR356-13	Eulagius filicornis	0.0
Eulagius filicornis	PSFOR1019-14	Eulagius filicornis	PSFOR349-13	Eulagius filicornis	0.0
Eulagius filicornis	PSFOR1019-14	Eulagius filicornis	PSFOR350-13	Eulagius filicornis	0.0
Gonodera luperus	PSFOR390-13	Gonodera luperus	PSFOR205-13	Gonodera luperus	0.0
Hadrobregmus denticollis	PSFOR698-13	Hadrobregmus denticollis	PSFOR1047-14	Hadrobregmus denticollis	0.0
Hemicrepidius hirtus	PSFOR1044-14	Hemicrepidius hirtus	PSFOR775-13	Hemicrepidius hirtus	0.15313807
Hylastes attenuatus	PSFOR420-13	Hylastes attenuatus	PSFOR921-14	Hylastes attenuatus	1.2367128
Hylastes barnensis	PSFOR920-14	Hylastes barnensis	PSFOR924-14	Hylastes barnensis	0.0
Hylesinus crenatus	PSFOR1065-14	Hylesinus crenatus	PSFOR706-13	Hylesinus crenatus	0.34662253
Hypoganus inunctus	PSFOR753-13	Hypoganus inunctus	PSFOR883-14	Hypoganus inunctus	0.0
Hypulus quercinus	PSFOR261-13	Hypulus quercinus	PSFOR1021-14	Hypulus quercinus	0.0
Lissodema cursor	PSFOR778-13	Lissodema cursor	PSFOR1026-14	Lissodema cursor	2.819231
Lymexylon navale	PSFOR284-13	Lymexylon navale	PSFOR1023-14	Lymexylon navale	0.0
Melandrya barbata	PSFOR464-13	Melandrya barbata	PSFOR471-13	Melandrya barbata	0.0
Melandrya caraboides	PSFOR873-14	Melandrya caraboides	PSFOR268-13	Melandrya caraboides	0.46030214
Melandrya caraboides	PSFOR366-13	Melandrya caraboides	PSFOR268-13	Melandrya caraboides	0.30645275
Melandrya caraboides	PSFOR366-13	Melandrya caraboides	PSFOR873-14	Melandrya caraboides	0.15313807
Melanotus castanipes	PSFOR886-14	Melanotus castanipes	PSFOR761-13	Melanotus castanipes	5.9256997
Melanotus villosus	PSFOR763-13	Melanotus villosus	PSFOR1042-14	Melanotus villosus	3.7997
Melasis buprestoides	PSFOR473-13	Melasis buprestoides	PSFOR317-13	Melasis buprestoides	0.0
Mesosa nebulosa	PSFOR022-13	Mesosa nebulosa	PSFOR438-13	Mesosa nebulosa	0.15313807
Microrhagus pygmaeus	PSFOR1000-14	Microrhagus pygmaeus	PSFOR1011-14	Microrhagus pygmaeus	0.0
Mycetochara maura	PSFOR395-13	Mycetochara maura	PSFOR211-13	Mycetochara maura	0.0
Mycetochara quadrimaculata	PSFOR212-13	Mycetochara quadrimaculata	PSFOR396-13	Mycetochara quadrimaculata	0.0
Nacerdes carniolica	PSFOR897-14	Nacerdes carniolica	PSFOR981-14	Nacerdes carniolica	0.0
Nalassus dryadophilus	PSFOR215-13	Nalassus dryadophilus	PSFOR217-13	Nalassus dryadophilus	0.0
Nalassus ecoffeti	PSFOR925-14	Nalassus ecoffeti	PSFOR216-13	Nalassus ecoffeti	13.748942
Nalassus ecoffeti	PSFOR930-14	Nalassus ecoffeti	PSFOR216-13	Nalassus ecoffeti	13.45968
Nalassus ecoffeti	PSFOR930-14	Nalassus ecoffeti	PSFOR925-14	Nalassus ecoffeti	7.5050235
Nalassus ecoffeti	PSFOR394-13	Nalassus ecoffeti	PSFOR216-13	Nalassus ecoffeti	14.934407
Nalassus ecoffeti	PSFOR394-13	Nalassus ecoffeti	PSFOR925-14	Nalassus ecoffeti	8.709525
Nalassus ecoffeti	PSFOR394-13	Nalassus ecoffeti	PSFOR930-14	Nalassus ecoffeti	6.270716
Nalassus ecoffeti	PSFOR927-14	Nalassus ecoffeti	PSFOR216-13	Nalassus ecoffeti	14.029476
Nalassus ecoffeti	PSFOR927-14	Nalassus ecoffeti	PSFOR925-14	Nalassus ecoffeti	9.077406
Nalassus ecoffeti	PSFOR927-14	Nalassus ecoffeti	PSFOR930-14	Nalassus ecoffeti	2.6584613
Nalassus ecoffeti	PSFOR927-14	Nalassus ecoffeti	PSFOR394-13	Nalassus ecoffeti	6.617055
Nalassus laevioctostriatus	PSFOR1068-14	Nalassus laevioctostriatus	PSFOR234-13	Nalassus laevioctostriatus	0.8196897
Nalassus laevioctostriatus	PSFOR388-13	Nalassus laevioctostriatus	PSFOR234-13	Nalassus laevioctostriatus	0.0
Nalassus laevioctostriatus	PSFOR388-13	Nalassus laevioctostriatus	PSFOR1068-14	Nalassus laevioctostriatus	0.8196897
Nemozoma elongatum	PSFOR551-13	Nemozoma elongatum	PSFOR475-13	Nemozoma elongatum	0.0
Nemozoma elongatum	PSFOR387-13	Nemozoma elongatum	PSFOR475-13	Nemozoma elongatum	0.24937788
Nemozoma elongatum	PSFOR387-13	Nemozoma elongatum	PSFOR551-13	Nemozoma elongatum	0.15313807
Nothodes parvulus	PSFOR776-13	Nothodes parvulus	PSFOR993-14	Nothodes parvulus	0.16447505
Oberea linearis	PSFOR067-13	Oberea linearis	PSFOR066-13	Oberea linearis	0.0
Ochina ptinoides	PSFOR991-14	Ochina ptinoides	PSFOR379-13	Ochina ptinoides	0.3067496
Oedemera podagrariae	PSFOR369-13	Oedemera podagrariae	PSFOR368-13	Oedemera podagrariae	0.982821
Opilo mollis	PSFOR1070-14	Opilo mollis	PSFOR371-13	Opilo mollis	0.15313807
Opilo pallidus	PSFOR626-13	Opilo pallidus	PSFOR813-13	Opilo pallidus	0.15313807
Orchesia undulata	PSFOR273-13	Orchesia undulata	PSFOR472-13	Orchesia undulata	0.0
Palorus depressus	PSFOR220-13	Palorus depressus	PSFOR389-13	Palorus depressus	0.0
Paracorymbia stragulata	PSFOR140-13	Paracorymbia stragulata	PSFOR139-13	Paracorymbia stragulata	0.0
Pedostrangalia revestita	PSFOR028-13	Pedostrangalia revestita	PSFOR144-13	Pedostrangalia revestita	0.3067496
Phloiotrya rufipes	PSFOR276-13	Phloiotrya rufipes	PSFOR906-14	Phloiotrya rufipes	0.0
Phymatodes testaceus	PSFOR1051-14	Phymatodes testaceus	PSFOR445-13	Phymatodes testaceus	1.5560442
Phymatodes testaceus	PSFOR431-13	Phymatodes testaceus	PSFOR445-13	Phymatodes testaceus	1.5560442
Phymatodes testaceus	PSFOR431-13	Phymatodes testaceus	PSFOR1051-14	Phymatodes testaceus	0.61539274
Phymatodes testaceus	PSFOR455-13	Phymatodes testaceus	PSFOR445-13	Phymatodes testaceus	1.3983133
Phymatodes testaceus	PSFOR455-13	Phymatodes testaceus	PSFOR1051-14	Phymatodes testaceus	0.15313807
Phymatodes testaceus	PSFOR455-13	Phymatodes testaceus	PSFOR431-13	Phymatodes testaceus	0.4608315
Plagionotus arcuatus	PSFOR010-13	Plagionotus arcuatus	PSFOR074-13	Plagionotus arcuatus	0.0
Platydema violaceum	PSFOR492-13	Platydema violaceum	PSFOR392-13	Platydema violaceum	0.0
Platydema violaceum	PSFOR223-13	Platydema violaceum	PSFOR392-13	Platydema violaceum	0.0
Platydema violaceum	PSFOR223-13	Platydema violaceum	PSFOR492-13	Platydema violaceum	0.0
Platypus cylindrus	PSFOR1071-14	Platypus cylindrus	PSFOR800-13	Platypus cylindrus	3.7635348
Platystomos albinus	PSFOR470-13	Platystomos albinus	PSFOR174-13	Platystomos albinus	0.0
Podeonius acuticornis	PSFOR758-13	Podeonius acuticornis	PSFOR967-14	Podeonius acuticornis	0.15313807
Poecilium alni	PSFOR076-13	Poecilium alni	PSFOR021-13	Poecilium alni	0.0
Pogonocherus hispidulus	PSFOR151-13	Pogonocherus hispidulus	PSFOR986-14	Pogonocherus hispidulus	0.0
Pogonocherus hispidulus	PSFOR483-13	Pogonocherus hispidulus	PSFOR986-14	Pogonocherus hispidulus	0.30645275
Pogonocherus hispidulus	PSFOR483-13	Pogonocherus hispidulus	PSFOR151-13	Pogonocherus hispidulus	0.30645275
Pseudocistela ceramboides	PSFOR199-13	Pseudocistela ceramboides	PSFOR1069-14	Pseudocistela ceramboides	0.15313807
Pseudocistela ceramboides	PSFOR398-13	Pseudocistela ceramboides	PSFOR1069-14	Pseudocistela ceramboides	0.15313807
Pseudocistela ceramboides	PSFOR398-13	Pseudocistela ceramboides	PSFOR199-13	Pseudocistela ceramboides	0.3067496
Pseudovadonia livida	PSFOR989-14	Pseudovadonia livida	PSFOR154-13	Pseudovadonia livida	3.799996
Ptilinus pectinicornis	PSFOR382-13	Ptilinus pectinicornis	PSFOR914-14	Ptilinus pectinicornis	0.0
Ptilinus pectinicornis	PSFOR383-13	Ptilinus pectinicornis	PSFOR914-14	Ptilinus pectinicornis	0.16528836
Ptilinus pectinicornis	PSFOR383-13	Ptilinus pectinicornis	PSFOR382-13	Ptilinus pectinicornis	0.0
Ptinomorphus regalis	PSFOR681-13	Ptinomorphus regalis	PSFOR680-13	Ptinomorphus regalis	0.0
Pyrochroa coccinea	PSFOR009-13	Pyrochroa coccinea	PSFOR295-13	Pyrochroa coccinea	0.0
Pyrrhidium sanguineum	PSFOR020-13	Pyrrhidium sanguineum	PSFOR481-13	Pyrrhidium sanguineum	0.0
Pyrrhidium sanguineum	PSFOR082-13	Pyrrhidium sanguineum	PSFOR481-13	Pyrrhidium sanguineum	0.4184121
Pyrrhidium sanguineum	PSFOR082-13	Pyrrhidium sanguineum	PSFOR020-13	Pyrrhidium sanguineum	0.3067496
Pyrrhidium sanguineum	PSFOR449-13	Pyrrhidium sanguineum	PSFOR481-13	Pyrrhidium sanguineum	0.0
Pyrrhidium sanguineum	PSFOR449-13	Pyrrhidium sanguineum	PSFOR020-13	Pyrrhidium sanguineum	0.21692117
Pyrrhidium sanguineum	PSFOR449-13	Pyrrhidium sanguineum	PSFOR082-13	Pyrrhidium sanguineum	0.4347845
Rhagium bifasciatum	PSFOR444-13	Rhagium bifasciatum	PSFOR876-14	Rhagium bifasciatum	2.1846092
Rhagium inquisitor	PSFOR435-13	Rhagium inquisitor	PSFOR880-14	Rhagium inquisitor	0.0
Rhagium inquisitor	PSFOR083-13	Rhagium inquisitor	PSFOR880-14	Rhagium inquisitor	0.0
Rhagium inquisitor	PSFOR083-13	Rhagium inquisitor	PSFOR435-13	Rhagium inquisitor	0.0
Rhagium mordax	PSFOR884-14	Rhagium mordax	PSFOR440-13	Rhagium mordax	0.0
Rhagium mordax	PSFOR084-13	Rhagium mordax	PSFOR440-13	Rhagium mordax	0.0
Rhagium mordax	PSFOR084-13	Rhagium mordax	PSFOR884-14	Rhagium mordax	0.0
Rhagium sycophanta	PSFOR443-13	Rhagium sycophanta	PSFOR027-13	Rhagium sycophanta	0.0
Rhizophagus cribratus	PSFOR877-14	Rhizophagus cribratus	PSFOR564-13	Rhizophagus cribratus	0.50000274
Rhizophagus cribratus	PSFOR484-13	Rhizophagus cribratus	PSFOR564-13	Rhizophagus cribratus	0.7518932
Rhizophagus cribratus	PSFOR484-13	Rhizophagus cribratus	PSFOR877-14	Rhizophagus cribratus	0.30645275
Rosalia alpina	PSFOR311-13	Rosalia alpina	PSFOR086-13	Rosalia alpina	0.0
Rutpela maculata	PSFOR450-13	Rutpela maculata	PSFOR451-13	Rutpela maculata	0.0
Saperda scalaris	PSFOR433-13	Saperda scalaris	PSFOR088-13	Saperda scalaris	1.866643
Schizotus pectinicornis	PSFOR001-13	Schizotus pectinicornis	PSFOR862-14	Schizotus pectinicornis	0.32626513
Scolytus intricatus	PSFOR423-13	Scolytus intricatus	PSFOR424-13	Scolytus intricatus	0.50000274
Serropalpus barbatus	PSFOR363-13	Serropalpus barbatus	PSFOR878-14	Serropalpus barbatus	0.0
Sinodendron cylindricum	PSFOR376-13	Sinodendron cylindricum	PSFOR881-14	Sinodendron cylindricum	0.0
Sinodendron cylindricum	PSFOR259-13	Sinodendron cylindricum	PSFOR881-14	Sinodendron cylindricum	2.652999
Sinodendron cylindricum	PSFOR259-13	Sinodendron cylindricum	PSFOR376-13	Sinodendron cylindricum	2.6571474
Stenocorus meridianus	PSFOR091-13	Stenocorus meridianus	PSFOR1060-14	Stenocorus meridianus	2.5046105
Stenurella melanura	PSFOR160-13	Stenurella melanura	PSFOR987-14	Stenurella melanura	0.0
Stenurella melanura	PSFOR453-13	Stenurella melanura	PSFOR987-14	Stenurella melanura	1.2367128
Stenurella melanura	PSFOR453-13	Stenurella melanura	PSFOR160-13	Stenurella melanura	1.2367128
Stenurella melanura	PSFOR454-13	Stenurella melanura	PSFOR987-14	Stenurella melanura	0.3067496
Stenurella melanura	PSFOR454-13	Stenurella melanura	PSFOR160-13	Stenurella melanura	0.3067496
Stenurella melanura	PSFOR454-13	Stenurella melanura	PSFOR453-13	Stenurella melanura	1.5506858
Stenurella melanura	PSFOR452-13	Stenurella melanura	PSFOR987-14	Stenurella melanura	0.32626513
Stenurella melanura	PSFOR452-13	Stenurella melanura	PSFOR160-13	Stenurella melanura	0.32626513
Stenurella melanura	PSFOR452-13	Stenurella melanura	PSFOR453-13	Stenurella melanura	1.6505126
Stenurella melanura	PSFOR452-13	Stenurella melanura	PSFOR454-13	Stenurella melanura	0.32626513
Stictoleptura rubra	PSFOR892-14	Stictoleptura rubra	PSFOR164-13	Stictoleptura rubra	0.77043015
Tetropium castaneum	PSFOR166-13	Tetropium castaneum	PSFOR432-13	Tetropium castaneum	0.0
Tetrops praeustus	PSFOR447-13	Tetrops praeustus	PSFOR988-14	Tetrops praeustus	12.927611
Thymalus limbatus	PSFOR385-13	Thymalus limbatus	PSFOR875-14	Thymalus limbatus	0.17035684
Thymalus limbatus	PSFOR554-13	Thymalus limbatus	PSFOR875-14	Thymalus limbatus	0.1620741
Thymalus limbatus	PSFOR554-13	Thymalus limbatus	PSFOR385-13	Thymalus limbatus	0.32154375
Thymalus limbatus	PSFOR384-13	Thymalus limbatus	PSFOR875-14	Thymalus limbatus	0.0
Thymalus limbatus	PSFOR384-13	Thymalus limbatus	PSFOR385-13	Thymalus limbatus	0.1605134
Thymalus limbatus	PSFOR384-13	Thymalus limbatus	PSFOR554-13	Thymalus limbatus	0.15313807
Tillus elongatus	PSFOR370-13	Tillus elongatus	PSFOR375-13	Tillus elongatus	9.797175
Tillus elongatus	PSFOR004-13	Tillus elongatus	PSFOR375-13	Tillus elongatus	9.993469
Tillus elongatus	PSFOR004-13	Tillus elongatus	PSFOR370-13	Tillus elongatus	0.24213018
Tillus elongatus	PSFOR885-14	Tillus elongatus	PSFOR375-13	Tillus elongatus	9.806907
Tillus elongatus	PSFOR885-14	Tillus elongatus	PSFOR370-13	Tillus elongatus	0.0
Tillus elongatus	PSFOR885-14	Tillus elongatus	PSFOR004-13	Tillus elongatus	0.15313807
Trichoferus pallidus	PSFOR017-13	Trichoferus pallidus	PSFOR097-13	Trichoferus pallidus	0.0
Trox perrisii	PSFOR668-13	Trox perrisii	PSFOR1038-14	Trox perrisii	0.0
Trypodendron domesticum	PSFOR406-13	Trypodendron domesticum	PSFOR872-14	Trypodendron domesticum	0.4608315
Trypodendron signatum	PSFOR416-13	Trypodendron signatum	PSFOR888-14	Trypodendron signatum	1.2678975
Xestobium rufovillosum	PSFOR690-13	Xestobium rufovillosum	PSFOR1041-14	Xestobium rufovillosum	0.25641093
Xyleborinus saxeseni	PSFOR468-13	Xyleborinus saxeseni	PSFOR409-13	Xyleborinus saxeseni	0.0
Xyleborinus saxeseni	PSFOR402-13	Xyleborinus saxeseni	PSFOR409-13	Xyleborinus saxeseni	0.0
Xyleborinus saxeseni	PSFOR402-13	Xyleborinus saxeseni	PSFOR468-13	Xyleborinus saxeseni	0.0
Xyleborus dispar	PSFOR404-13	Xyleborus dispar	PSFOR408-13	Xyleborus dispar	0.0
Xyleborus dryographus	PSFOR399-13	Xyleborus dryographus	PSFOR412-13	Xyleborus dryographus	0.0
Xyleborus monographus	PSFOR1029-14	Xyleborus monographus	PSFOR415-13	Xyleborus monographus	0.33783948
Xyleborus monographus	PSFOR414-13	Xyleborus monographus	PSFOR415-13	Xyleborus monographus	0.0
Xyleborus monographus	PSFOR414-13	Xyleborus monographus	PSFOR1029-14	Xyleborus monographus	0.33783948
Xyleborus monographus	PSFOR403-13	Xyleborus monographus	PSFOR415-13	Xyleborus monographus	0.46154135
Xyleborus monographus	PSFOR403-13	Xyleborus monographus	PSFOR1029-14	Xyleborus monographus	0.0
Xyleborus monographus	PSFOR403-13	Xyleborus monographus	PSFOR414-13	Xyleborus monographus	0.4608315
Xyleborus monographus	PSFOR005-13	Xyleborus monographus	PSFOR415-13	Xyleborus monographus	0.0
Xyleborus monographus	PSFOR005-13	Xyleborus monographus	PSFOR1029-14	Xyleborus monographus	0.33783948
Xyleborus monographus	PSFOR005-13	Xyleborus monographus	PSFOR414-13	Xyleborus monographus	0.0
Xyleborus monographus	PSFOR005-13	Xyleborus monographus	PSFOR403-13	Xyleborus monographus	0.4608315
Xyleborus monographus	PSFOR474-13	Xyleborus monographus	PSFOR415-13	Xyleborus monographus	0.23201808
Xyleborus monographus	PSFOR474-13	Xyleborus monographus	PSFOR1029-14	Xyleborus monographus	0.0
Xyleborus monographus	PSFOR474-13	Xyleborus monographus	PSFOR414-13	Xyleborus monographus	0.23201808
Xyleborus monographus	PSFOR474-13	Xyleborus monographus	PSFOR403-13	Xyleborus monographus	0.0
Xyleborus monographus	PSFOR474-13	Xyleborus monographus	PSFOR005-13	Xyleborus monographus	0.23201808
