# Supplementary material for: PASSIFOR: A reference library of DNA barcodes for French saproxylic beetles (Insecta, Coleoptera)
Source: Biodivers Data J. 2015 Mar 4;(3):e4078. doi: 10.3897/BDJ.3.e4078 (PMC4355675; doi:10.3897/BDJ.3.e4078)
Supplement: Supplementary material 5 — Pairwise K2P distances within genera [file biodiversity_data_journal-3-e4078-s005.xls]

## Sheet: details_14.xls
Genus	ProcessID	Species	ProcessID	Species	K2P
Acanthocinus	PSFOR030-13	Acanthocinus reticulatus	PSFOR029-13	Acanthocinus aedilis	10.354869
Agriotes	PSFOR1075-14	Agriotes pallidulus	PSFOR1053-14	Agriotes acuminatus	12.278364
Agriotes	PSFOR1052-14	Agriotes pilosellus	PSFOR1053-14	Agriotes acuminatus	18.184343
Agriotes	PSFOR1052-14	Agriotes pilosellus	PSFOR1075-14	Agriotes pallidulus	18.841856
Agriotes	PSFOR766-13	Agriotes pilosellus	PSFOR1053-14	Agriotes acuminatus	17.49338
Agriotes	PSFOR766-13	Agriotes pilosellus	PSFOR1075-14	Agriotes pallidulus	18.663952
Ampedus	PSFOR722-13	Ampedus balteatus	PSFOR721-13	Ampedus aurilegulus	12.003396
Ampedus	PSFOR722-13	Ampedus balteatus	PSFOR852-13	Ampedus aurilegulus	12.394437
Ampedus	PSFOR957-14	Ampedus balteatus	PSFOR721-13	Ampedus aurilegulus	12.013772
Ampedus	PSFOR957-14	Ampedus balteatus	PSFOR852-13	Ampedus aurilegulus	12.405597
Ampedus	PSFOR838-13	Ampedus balteatus	PSFOR721-13	Ampedus aurilegulus	12.087782
Ampedus	PSFOR838-13	Ampedus balteatus	PSFOR852-13	Ampedus aurilegulus	12.28931
Ampedus	PSFOR1056-14	Ampedus balteatus	PSFOR721-13	Ampedus aurilegulus	12.763864
Ampedus	PSFOR1056-14	Ampedus balteatus	PSFOR852-13	Ampedus aurilegulus	12.93847
Ampedus	PSFOR834-13	Ampedus brunnicornis	PSFOR721-13	Ampedus aurilegulus	11.415473
Ampedus	PSFOR834-13	Ampedus brunnicornis	PSFOR852-13	Ampedus aurilegulus	11.44582
Ampedus	PSFOR834-13	Ampedus brunnicornis	PSFOR722-13	Ampedus balteatus	7.474878
Ampedus	PSFOR834-13	Ampedus brunnicornis	PSFOR957-14	Ampedus balteatus	7.6413555
Ampedus	PSFOR834-13	Ampedus brunnicornis	PSFOR838-13	Ampedus balteatus	7.5238614
Ampedus	PSFOR834-13	Ampedus brunnicornis	PSFOR1056-14	Ampedus balteatus	8.337343
Ampedus	PSFOR737-13	Ampedus brunnicornis	PSFOR721-13	Ampedus aurilegulus	11.415473
Ampedus	PSFOR737-13	Ampedus brunnicornis	PSFOR852-13	Ampedus aurilegulus	11.44582
Ampedus	PSFOR737-13	Ampedus brunnicornis	PSFOR722-13	Ampedus balteatus	7.474878
Ampedus	PSFOR737-13	Ampedus brunnicornis	PSFOR957-14	Ampedus balteatus	7.6413555
Ampedus	PSFOR737-13	Ampedus brunnicornis	PSFOR838-13	Ampedus balteatus	7.5238614
Ampedus	PSFOR737-13	Ampedus brunnicornis	PSFOR1056-14	Ampedus balteatus	8.337343
Ampedus	PSFOR723-13	Ampedus cardinalis	PSFOR721-13	Ampedus aurilegulus	12.393261
Ampedus	PSFOR723-13	Ampedus cardinalis	PSFOR852-13	Ampedus aurilegulus	13.139897
Ampedus	PSFOR723-13	Ampedus cardinalis	PSFOR722-13	Ampedus balteatus	7.5979495
Ampedus	PSFOR723-13	Ampedus cardinalis	PSFOR957-14	Ampedus balteatus	7.5921493
Ampedus	PSFOR723-13	Ampedus cardinalis	PSFOR838-13	Ampedus balteatus	7.6474676
Ampedus	PSFOR723-13	Ampedus cardinalis	PSFOR1056-14	Ampedus balteatus	8.457853
Ampedus	PSFOR723-13	Ampedus cardinalis	PSFOR834-13	Ampedus brunnicornis	7.816794
Ampedus	PSFOR723-13	Ampedus cardinalis	PSFOR737-13	Ampedus brunnicornis	7.816794
Ampedus	PSFOR847-13	Ampedus cardinalis	PSFOR721-13	Ampedus aurilegulus	12.578313
Ampedus	PSFOR847-13	Ampedus cardinalis	PSFOR852-13	Ampedus aurilegulus	13.318703
Ampedus	PSFOR847-13	Ampedus cardinalis	PSFOR722-13	Ampedus balteatus	7.952604
Ampedus	PSFOR847-13	Ampedus cardinalis	PSFOR957-14	Ampedus balteatus	7.945777
Ampedus	PSFOR847-13	Ampedus cardinalis	PSFOR838-13	Ampedus balteatus	8.004646
Ampedus	PSFOR847-13	Ampedus cardinalis	PSFOR1056-14	Ampedus balteatus	8.818128
Ampedus	PSFOR847-13	Ampedus cardinalis	PSFOR834-13	Ampedus brunnicornis	7.650006
Ampedus	PSFOR847-13	Ampedus cardinalis	PSFOR737-13	Ampedus brunnicornis	7.650006
Ampedus	PSFOR734-13	Ampedus cinnabarinus	PSFOR721-13	Ampedus aurilegulus	10.954808
Ampedus	PSFOR734-13	Ampedus cinnabarinus	PSFOR852-13	Ampedus aurilegulus	10.80754
Ampedus	PSFOR734-13	Ampedus cinnabarinus	PSFOR722-13	Ampedus balteatus	12.206821
Ampedus	PSFOR734-13	Ampedus cinnabarinus	PSFOR957-14	Ampedus balteatus	12.217623
Ampedus	PSFOR734-13	Ampedus cinnabarinus	PSFOR838-13	Ampedus balteatus	12.111588
Ampedus	PSFOR734-13	Ampedus cinnabarinus	PSFOR1056-14	Ampedus balteatus	12.582763
Ampedus	PSFOR734-13	Ampedus cinnabarinus	PSFOR834-13	Ampedus brunnicornis	11.4825945
Ampedus	PSFOR734-13	Ampedus cinnabarinus	PSFOR737-13	Ampedus brunnicornis	11.4825945
Ampedus	PSFOR734-13	Ampedus cinnabarinus	PSFOR723-13	Ampedus cardinalis	12.927611
Ampedus	PSFOR734-13	Ampedus cinnabarinus	PSFOR847-13	Ampedus cardinalis	12.373493
Ampedus	PSFOR827-13	Ampedus elongatulus	PSFOR721-13	Ampedus aurilegulus	11.694099
Ampedus	PSFOR827-13	Ampedus elongatulus	PSFOR852-13	Ampedus aurilegulus	12.45472
Ampedus	PSFOR827-13	Ampedus elongatulus	PSFOR722-13	Ampedus balteatus	11.51484
Ampedus	PSFOR827-13	Ampedus elongatulus	PSFOR957-14	Ampedus balteatus	11.340248
Ampedus	PSFOR827-13	Ampedus elongatulus	PSFOR838-13	Ampedus balteatus	11.604279
Ampedus	PSFOR827-13	Ampedus elongatulus	PSFOR1056-14	Ampedus balteatus	12.618649
Ampedus	PSFOR827-13	Ampedus elongatulus	PSFOR834-13	Ampedus brunnicornis	11.4929
Ampedus	PSFOR827-13	Ampedus elongatulus	PSFOR737-13	Ampedus brunnicornis	11.4929
Ampedus	PSFOR827-13	Ampedus elongatulus	PSFOR723-13	Ampedus cardinalis	12.041258
Ampedus	PSFOR827-13	Ampedus elongatulus	PSFOR847-13	Ampedus cardinalis	11.657918
Ampedus	PSFOR827-13	Ampedus elongatulus	PSFOR734-13	Ampedus cinnabarinus	12.240578
Ampedus	PSFOR933-14	Ampedus elongatulus	PSFOR721-13	Ampedus aurilegulus	11.769029
Ampedus	PSFOR933-14	Ampedus elongatulus	PSFOR852-13	Ampedus aurilegulus	12.531726
Ampedus	PSFOR933-14	Ampedus elongatulus	PSFOR722-13	Ampedus balteatus	11.584726
Ampedus	PSFOR933-14	Ampedus elongatulus	PSFOR957-14	Ampedus balteatus	11.409309
Ampedus	PSFOR933-14	Ampedus elongatulus	PSFOR838-13	Ampedus balteatus	11.6757
Ampedus	PSFOR933-14	Ampedus elongatulus	PSFOR1056-14	Ampedus balteatus	12.6959305
Ampedus	PSFOR933-14	Ampedus elongatulus	PSFOR834-13	Ampedus brunnicornis	11.561661
Ampedus	PSFOR933-14	Ampedus elongatulus	PSFOR737-13	Ampedus brunnicornis	11.561661
Ampedus	PSFOR933-14	Ampedus elongatulus	PSFOR723-13	Ampedus cardinalis	12.113661
Ampedus	PSFOR933-14	Ampedus elongatulus	PSFOR847-13	Ampedus cardinalis	11.726956
Ampedus	PSFOR933-14	Ampedus elongatulus	PSFOR734-13	Ampedus cinnabarinus	12.125582
Ampedus	PSFOR543-13	Ampedus elongatulus	PSFOR721-13	Ampedus aurilegulus	12.370816
Ampedus	PSFOR543-13	Ampedus elongatulus	PSFOR852-13	Ampedus aurilegulus	13.891899
Ampedus	PSFOR543-13	Ampedus elongatulus	PSFOR722-13	Ampedus balteatus	13.459776
Ampedus	PSFOR543-13	Ampedus elongatulus	PSFOR957-14	Ampedus balteatus	13.168756
Ampedus	PSFOR543-13	Ampedus elongatulus	PSFOR838-13	Ampedus balteatus	13.592969
Ampedus	PSFOR543-13	Ampedus elongatulus	PSFOR1056-14	Ampedus balteatus	14.9949
Ampedus	PSFOR543-13	Ampedus elongatulus	PSFOR834-13	Ampedus brunnicornis	13.149217
Ampedus	PSFOR543-13	Ampedus elongatulus	PSFOR737-13	Ampedus brunnicornis	13.149217
Ampedus	PSFOR543-13	Ampedus elongatulus	PSFOR723-13	Ampedus cardinalis	13.772278
Ampedus	PSFOR543-13	Ampedus elongatulus	PSFOR847-13	Ampedus cardinalis	13.440498
Ampedus	PSFOR543-13	Ampedus elongatulus	PSFOR734-13	Ampedus cinnabarinus	12.899935
Ampedus	PSFOR854-13	Ampedus erythrogonus	PSFOR721-13	Ampedus aurilegulus	16.620651
Ampedus	PSFOR854-13	Ampedus erythrogonus	PSFOR852-13	Ampedus aurilegulus	16.650509
Ampedus	PSFOR854-13	Ampedus erythrogonus	PSFOR722-13	Ampedus balteatus	13.797323
Ampedus	PSFOR854-13	Ampedus erythrogonus	PSFOR957-14	Ampedus balteatus	13.5998535
Ampedus	PSFOR854-13	Ampedus erythrogonus	PSFOR838-13	Ampedus balteatus	13.718154
Ampedus	PSFOR854-13	Ampedus erythrogonus	PSFOR1056-14	Ampedus balteatus	14.3698435
Ampedus	PSFOR854-13	Ampedus erythrogonus	PSFOR834-13	Ampedus brunnicornis	14.178276
Ampedus	PSFOR854-13	Ampedus erythrogonus	PSFOR737-13	Ampedus brunnicornis	14.178276
Ampedus	PSFOR854-13	Ampedus erythrogonus	PSFOR723-13	Ampedus cardinalis	15.093379
Ampedus	PSFOR854-13	Ampedus erythrogonus	PSFOR847-13	Ampedus cardinalis	15.277873
Ampedus	PSFOR854-13	Ampedus erythrogonus	PSFOR734-13	Ampedus cinnabarinus	15.686096
Ampedus	PSFOR854-13	Ampedus erythrogonus	PSFOR827-13	Ampedus elongatulus	17.319767
Ampedus	PSFOR854-13	Ampedus erythrogonus	PSFOR933-14	Ampedus elongatulus	17.221897
Ampedus	PSFOR854-13	Ampedus erythrogonus	PSFOR543-13	Ampedus elongatulus	16.13542
Ampedus	PSFOR853-13	Ampedus erythrogonus	PSFOR721-13	Ampedus aurilegulus	16.755816
Ampedus	PSFOR853-13	Ampedus erythrogonus	PSFOR852-13	Ampedus aurilegulus	16.564606
Ampedus	PSFOR853-13	Ampedus erythrogonus	PSFOR722-13	Ampedus balteatus	12.8754425
Ampedus	PSFOR853-13	Ampedus erythrogonus	PSFOR957-14	Ampedus balteatus	12.665045
Ampedus	PSFOR853-13	Ampedus erythrogonus	PSFOR838-13	Ampedus balteatus	12.783604
Ampedus	PSFOR853-13	Ampedus erythrogonus	PSFOR1056-14	Ampedus balteatus	13.487691
Ampedus	PSFOR853-13	Ampedus erythrogonus	PSFOR834-13	Ampedus brunnicornis	14.096633
Ampedus	PSFOR853-13	Ampedus erythrogonus	PSFOR737-13	Ampedus brunnicornis	14.096633
Ampedus	PSFOR853-13	Ampedus erythrogonus	PSFOR723-13	Ampedus cardinalis	14.273904
Ampedus	PSFOR853-13	Ampedus erythrogonus	PSFOR847-13	Ampedus cardinalis	14.47187
Ampedus	PSFOR853-13	Ampedus erythrogonus	PSFOR734-13	Ampedus cinnabarinus	15.08795
Ampedus	PSFOR853-13	Ampedus erythrogonus	PSFOR827-13	Ampedus elongatulus	16.432512
Ampedus	PSFOR853-13	Ampedus erythrogonus	PSFOR933-14	Ampedus elongatulus	16.32291
Ampedus	PSFOR853-13	Ampedus erythrogonus	PSFOR543-13	Ampedus elongatulus	16.13542
Ampedus	PSFOR726-13	Ampedus erythrogonus	PSFOR721-13	Ampedus aurilegulus	16.610605
Ampedus	PSFOR726-13	Ampedus erythrogonus	PSFOR852-13	Ampedus aurilegulus	16.639383
Ampedus	PSFOR726-13	Ampedus erythrogonus	PSFOR722-13	Ampedus balteatus	13.8062315
Ampedus	PSFOR726-13	Ampedus erythrogonus	PSFOR957-14	Ampedus balteatus	13.607928
Ampedus	PSFOR726-13	Ampedus erythrogonus	PSFOR838-13	Ampedus balteatus	13.727789
Ampedus	PSFOR726-13	Ampedus erythrogonus	PSFOR1056-14	Ampedus balteatus	14.18791
Ampedus	PSFOR726-13	Ampedus erythrogonus	PSFOR834-13	Ampedus brunnicornis	14.379851
Ampedus	PSFOR726-13	Ampedus erythrogonus	PSFOR737-13	Ampedus brunnicornis	14.379851
Ampedus	PSFOR726-13	Ampedus erythrogonus	PSFOR723-13	Ampedus cardinalis	15.102432
Ampedus	PSFOR726-13	Ampedus erythrogonus	PSFOR847-13	Ampedus cardinalis	15.286801
Ampedus	PSFOR726-13	Ampedus erythrogonus	PSFOR734-13	Ampedus cinnabarinus	15.480979
Ampedus	PSFOR726-13	Ampedus erythrogonus	PSFOR827-13	Ampedus elongatulus	17.335146
Ampedus	PSFOR726-13	Ampedus erythrogonus	PSFOR933-14	Ampedus elongatulus	17.237537
Ampedus	PSFOR726-13	Ampedus erythrogonus	PSFOR543-13	Ampedus elongatulus	16.153477
Ampedus	PSFOR936-14	Ampedus melonii	PSFOR721-13	Ampedus aurilegulus	12.013772
Ampedus	PSFOR936-14	Ampedus melonii	PSFOR852-13	Ampedus aurilegulus	12.771802
Ampedus	PSFOR936-14	Ampedus melonii	PSFOR722-13	Ampedus balteatus	7.097885
Ampedus	PSFOR936-14	Ampedus melonii	PSFOR957-14	Ampedus balteatus	7.2641716
Ampedus	PSFOR936-14	Ampedus melonii	PSFOR838-13	Ampedus balteatus	7.144039
Ampedus	PSFOR936-14	Ampedus melonii	PSFOR1056-14	Ampedus balteatus	7.952604
Ampedus	PSFOR936-14	Ampedus melonii	PSFOR834-13	Ampedus brunnicornis	6.7959013
Ampedus	PSFOR936-14	Ampedus melonii	PSFOR737-13	Ampedus brunnicornis	6.7959013
Ampedus	PSFOR936-14	Ampedus melonii	PSFOR723-13	Ampedus cardinalis	1.2343117
Ampedus	PSFOR936-14	Ampedus melonii	PSFOR847-13	Ampedus cardinalis	1.3918257
Ampedus	PSFOR936-14	Ampedus melonii	PSFOR734-13	Ampedus cinnabarinus	12.019908
Ampedus	PSFOR936-14	Ampedus melonii	PSFOR827-13	Ampedus elongatulus	12.030358
Ampedus	PSFOR936-14	Ampedus melonii	PSFOR933-14	Ampedus elongatulus	12.102194
Ampedus	PSFOR936-14	Ampedus melonii	PSFOR543-13	Ampedus elongatulus	13.130898
Ampedus	PSFOR936-14	Ampedus melonii	PSFOR854-13	Ampedus erythrogonus	15.277873
Ampedus	PSFOR936-14	Ampedus melonii	PSFOR853-13	Ampedus erythrogonus	14.47187
Ampedus	PSFOR936-14	Ampedus melonii	PSFOR726-13	Ampedus erythrogonus	15.286801
Ampedus	PSFOR932-14	Ampedus nemoralis	PSFOR721-13	Ampedus aurilegulus	11.646883
Ampedus	PSFOR932-14	Ampedus nemoralis	PSFOR852-13	Ampedus aurilegulus	12.030358
Ampedus	PSFOR932-14	Ampedus nemoralis	PSFOR722-13	Ampedus balteatus	12.030358
Ampedus	PSFOR932-14	Ampedus nemoralis	PSFOR957-14	Ampedus balteatus	11.854345
Ampedus	PSFOR932-14	Ampedus nemoralis	PSFOR838-13	Ampedus balteatus	12.1226425
Ampedus	PSFOR932-14	Ampedus nemoralis	PSFOR1056-14	Ampedus balteatus	13.139897
Ampedus	PSFOR932-14	Ampedus nemoralis	PSFOR834-13	Ampedus brunnicornis	12.45472
Ampedus	PSFOR932-14	Ampedus nemoralis	PSFOR737-13	Ampedus brunnicornis	12.45472
Ampedus	PSFOR932-14	Ampedus nemoralis	PSFOR723-13	Ampedus cardinalis	13.152027
Ampedus	PSFOR932-14	Ampedus nemoralis	PSFOR847-13	Ampedus cardinalis	12.973783
Ampedus	PSFOR932-14	Ampedus nemoralis	PSFOR734-13	Ampedus cinnabarinus	9.850412
Ampedus	PSFOR932-14	Ampedus nemoralis	PSFOR827-13	Ampedus elongatulus	7.126443
Ampedus	PSFOR932-14	Ampedus nemoralis	PSFOR933-14	Ampedus elongatulus	6.8210797
Ampedus	PSFOR932-14	Ampedus nemoralis	PSFOR543-13	Ampedus elongatulus	7.6694617
Ampedus	PSFOR932-14	Ampedus nemoralis	PSFOR854-13	Ampedus erythrogonus	17.088518
Ampedus	PSFOR932-14	Ampedus nemoralis	PSFOR853-13	Ampedus erythrogonus	16.186525
Ampedus	PSFOR932-14	Ampedus nemoralis	PSFOR726-13	Ampedus erythrogonus	16.900858
Ampedus	PSFOR932-14	Ampedus nemoralis	PSFOR936-14	Ampedus melonii	12.7836685
Ampedus	PSFOR528-13	Ampedus nemoralis	PSFOR721-13	Ampedus aurilegulus	11.310461
Ampedus	PSFOR528-13	Ampedus nemoralis	PSFOR852-13	Ampedus aurilegulus	11.707277
Ampedus	PSFOR528-13	Ampedus nemoralis	PSFOR722-13	Ampedus balteatus	11.883566
Ampedus	PSFOR528-13	Ampedus nemoralis	PSFOR957-14	Ampedus balteatus	11.707277
Ampedus	PSFOR528-13	Ampedus nemoralis	PSFOR838-13	Ampedus balteatus	11.974711
Ampedus	PSFOR528-13	Ampedus nemoralis	PSFOR1056-14	Ampedus balteatus	12.993662
Ampedus	PSFOR528-13	Ampedus nemoralis	PSFOR834-13	Ampedus brunnicornis	12.117443
Ampedus	PSFOR528-13	Ampedus nemoralis	PSFOR737-13	Ampedus brunnicornis	12.117443
Ampedus	PSFOR528-13	Ampedus nemoralis	PSFOR723-13	Ampedus cardinalis	13.005516
Ampedus	PSFOR528-13	Ampedus nemoralis	PSFOR847-13	Ampedus cardinalis	12.826989
Ampedus	PSFOR528-13	Ampedus nemoralis	PSFOR734-13	Ampedus cinnabarinus	9.8829365
Ampedus	PSFOR528-13	Ampedus nemoralis	PSFOR827-13	Ampedus elongatulus	6.9757247
Ampedus	PSFOR528-13	Ampedus nemoralis	PSFOR933-14	Ampedus elongatulus	6.6585793
Ampedus	PSFOR528-13	Ampedus nemoralis	PSFOR543-13	Ampedus elongatulus	7.6694617
Ampedus	PSFOR528-13	Ampedus nemoralis	PSFOR854-13	Ampedus erythrogonus	17.35093
Ampedus	PSFOR528-13	Ampedus nemoralis	PSFOR853-13	Ampedus erythrogonus	16.464245
Ampedus	PSFOR528-13	Ampedus nemoralis	PSFOR726-13	Ampedus erythrogonus	17.16215
Ampedus	PSFOR528-13	Ampedus nemoralis	PSFOR936-14	Ampedus melonii	12.636881
Ampedus	PSFOR542-13	Ampedus nemoralis	PSFOR721-13	Ampedus aurilegulus	11.453457
Ampedus	PSFOR542-13	Ampedus nemoralis	PSFOR852-13	Ampedus aurilegulus	11.843792
Ampedus	PSFOR542-13	Ampedus nemoralis	PSFOR722-13	Ampedus balteatus	11.843792
Ampedus	PSFOR542-13	Ampedus nemoralis	PSFOR957-14	Ampedus balteatus	11.668124
Ampedus	PSFOR542-13	Ampedus nemoralis	PSFOR838-13	Ampedus balteatus	11.934317
Ampedus	PSFOR542-13	Ampedus nemoralis	PSFOR1056-14	Ampedus balteatus	12.949785
Ampedus	PSFOR542-13	Ampedus nemoralis	PSFOR834-13	Ampedus brunnicornis	12.265325
Ampedus	PSFOR542-13	Ampedus nemoralis	PSFOR737-13	Ampedus brunnicornis	12.265325
Ampedus	PSFOR542-13	Ampedus nemoralis	PSFOR723-13	Ampedus cardinalis	12.961553
Ampedus	PSFOR542-13	Ampedus nemoralis	PSFOR847-13	Ampedus cardinalis	12.7836685
Ampedus	PSFOR542-13	Ampedus nemoralis	PSFOR734-13	Ampedus cinnabarinus	10.030272
Ampedus	PSFOR542-13	Ampedus nemoralis	PSFOR827-13	Ampedus elongatulus	6.953132
Ampedus	PSFOR542-13	Ampedus nemoralis	PSFOR933-14	Ampedus elongatulus	6.64777
Ampedus	PSFOR542-13	Ampedus nemoralis	PSFOR543-13	Ampedus elongatulus	7.6694617
Ampedus	PSFOR542-13	Ampedus nemoralis	PSFOR854-13	Ampedus erythrogonus	17.290535
Ampedus	PSFOR542-13	Ampedus nemoralis	PSFOR853-13	Ampedus erythrogonus	16.402512
Ampedus	PSFOR542-13	Ampedus nemoralis	PSFOR726-13	Ampedus erythrogonus	17.102468
Ampedus	PSFOR542-13	Ampedus nemoralis	PSFOR936-14	Ampedus melonii	12.594275
Ampedus	PSFOR828-13	Ampedus nigerrimus	PSFOR721-13	Ampedus aurilegulus	10.345277
Ampedus	PSFOR828-13	Ampedus nigerrimus	PSFOR852-13	Ampedus aurilegulus	11.51484
Ampedus	PSFOR828-13	Ampedus nigerrimus	PSFOR722-13	Ampedus balteatus	11.307712
Ampedus	PSFOR828-13	Ampedus nigerrimus	PSFOR957-14	Ampedus balteatus	11.318123
Ampedus	PSFOR828-13	Ampedus nigerrimus	PSFOR838-13	Ampedus balteatus	11.394216
Ampedus	PSFOR828-13	Ampedus nigerrimus	PSFOR1056-14	Ampedus balteatus	12.030358
Ampedus	PSFOR828-13	Ampedus nigerrimus	PSFOR834-13	Ampedus brunnicornis	12.550966
Ampedus	PSFOR828-13	Ampedus nigerrimus	PSFOR737-13	Ampedus brunnicornis	12.550966
Ampedus	PSFOR828-13	Ampedus nigerrimus	PSFOR723-13	Ampedus cardinalis	12.000359
Ampedus	PSFOR828-13	Ampedus nigerrimus	PSFOR847-13	Ampedus cardinalis	11.806071
Ampedus	PSFOR828-13	Ampedus nigerrimus	PSFOR734-13	Ampedus cinnabarinus	11.087369
Ampedus	PSFOR828-13	Ampedus nigerrimus	PSFOR827-13	Ampedus elongatulus	10.785714
Ampedus	PSFOR828-13	Ampedus nigerrimus	PSFOR933-14	Ampedus elongatulus	10.665805
Ampedus	PSFOR828-13	Ampedus nigerrimus	PSFOR543-13	Ampedus elongatulus	11.639583
Ampedus	PSFOR828-13	Ampedus nigerrimus	PSFOR854-13	Ampedus erythrogonus	14.401293
Ampedus	PSFOR828-13	Ampedus nigerrimus	PSFOR853-13	Ampedus erythrogonus	14.959354
Ampedus	PSFOR828-13	Ampedus nigerrimus	PSFOR726-13	Ampedus erythrogonus	14.39033
Ampedus	PSFOR828-13	Ampedus nigerrimus	PSFOR936-14	Ampedus melonii	11.991259
Ampedus	PSFOR828-13	Ampedus nigerrimus	PSFOR932-14	Ampedus nemoralis	10.383649
Ampedus	PSFOR828-13	Ampedus nigerrimus	PSFOR528-13	Ampedus nemoralis	10.600223
Ampedus	PSFOR828-13	Ampedus nigerrimus	PSFOR542-13	Ampedus nemoralis	10.565141
Ampedus	PSFOR855-13	Ampedus nigerrimus	PSFOR721-13	Ampedus aurilegulus	10.716293
Ampedus	PSFOR855-13	Ampedus nigerrimus	PSFOR852-13	Ampedus aurilegulus	11.876785
Ampedus	PSFOR855-13	Ampedus nigerrimus	PSFOR722-13	Ampedus balteatus	11.50365
Ampedus	PSFOR855-13	Ampedus nigerrimus	PSFOR957-14	Ampedus balteatus	11.51484
Ampedus	PSFOR855-13	Ampedus nigerrimus	PSFOR838-13	Ampedus balteatus	11.592485
Ampedus	PSFOR855-13	Ampedus nigerrimus	PSFOR1056-14	Ampedus balteatus	12.228876
Ampedus	PSFOR855-13	Ampedus nigerrimus	PSFOR834-13	Ampedus brunnicornis	12.749432
Ampedus	PSFOR855-13	Ampedus nigerrimus	PSFOR737-13	Ampedus brunnicornis	12.749432
Ampedus	PSFOR855-13	Ampedus nigerrimus	PSFOR723-13	Ampedus cardinalis	12.363699
Ampedus	PSFOR855-13	Ampedus nigerrimus	PSFOR847-13	Ampedus cardinalis	12.000359
Ampedus	PSFOR855-13	Ampedus nigerrimus	PSFOR734-13	Ampedus cinnabarinus	11.279154
Ampedus	PSFOR855-13	Ampedus nigerrimus	PSFOR827-13	Ampedus elongatulus	11.328965
Ampedus	PSFOR855-13	Ampedus nigerrimus	PSFOR933-14	Ampedus elongatulus	11.210891
Ampedus	PSFOR855-13	Ampedus nigerrimus	PSFOR543-13	Ampedus elongatulus	12.533824
Ampedus	PSFOR855-13	Ampedus nigerrimus	PSFOR854-13	Ampedus erythrogonus	14.39033
Ampedus	PSFOR855-13	Ampedus nigerrimus	PSFOR853-13	Ampedus erythrogonus	14.946132
Ampedus	PSFOR855-13	Ampedus nigerrimus	PSFOR726-13	Ampedus erythrogonus	14.379851
Ampedus	PSFOR855-13	Ampedus nigerrimus	PSFOR936-14	Ampedus melonii	12.186576
Ampedus	PSFOR855-13	Ampedus nigerrimus	PSFOR932-14	Ampedus nemoralis	10.939387
Ampedus	PSFOR855-13	Ampedus nigerrimus	PSFOR528-13	Ampedus nemoralis	11.16038
Ampedus	PSFOR855-13	Ampedus nigerrimus	PSFOR542-13	Ampedus nemoralis	11.123214
Ampedus	PSFOR338-13	Ampedus nigerrimus	PSFOR721-13	Ampedus aurilegulus	10.525456
Ampedus	PSFOR338-13	Ampedus nigerrimus	PSFOR852-13	Ampedus aurilegulus	11.689867
Ampedus	PSFOR338-13	Ampedus nigerrimus	PSFOR722-13	Ampedus balteatus	11.318123
Ampedus	PSFOR338-13	Ampedus nigerrimus	PSFOR957-14	Ampedus balteatus	11.328965
Ampedus	PSFOR338-13	Ampedus nigerrimus	PSFOR838-13	Ampedus balteatus	11.405221
Ampedus	PSFOR338-13	Ampedus nigerrimus	PSFOR1056-14	Ampedus balteatus	12.041258
Ampedus	PSFOR338-13	Ampedus nigerrimus	PSFOR834-13	Ampedus brunnicornis	12.561111
Ampedus	PSFOR338-13	Ampedus nigerrimus	PSFOR737-13	Ampedus brunnicornis	12.561111
Ampedus	PSFOR338-13	Ampedus nigerrimus	PSFOR723-13	Ampedus cardinalis	12.1771345
Ampedus	PSFOR338-13	Ampedus nigerrimus	PSFOR847-13	Ampedus cardinalis	11.814828
Ampedus	PSFOR338-13	Ampedus nigerrimus	PSFOR734-13	Ampedus cinnabarinus	11.095665
Ampedus	PSFOR338-13	Ampedus nigerrimus	PSFOR827-13	Ampedus elongatulus	11.143783
Ampedus	PSFOR338-13	Ampedus nigerrimus	PSFOR933-14	Ampedus elongatulus	11.025019
Ampedus	PSFOR338-13	Ampedus nigerrimus	PSFOR543-13	Ampedus elongatulus	12.228941
Ampedus	PSFOR338-13	Ampedus nigerrimus	PSFOR854-13	Ampedus erythrogonus	14.198023
Ampedus	PSFOR338-13	Ampedus nigerrimus	PSFOR853-13	Ampedus erythrogonus	14.735161
Ampedus	PSFOR338-13	Ampedus nigerrimus	PSFOR726-13	Ampedus erythrogonus	14.18791
Ampedus	PSFOR338-13	Ampedus nigerrimus	PSFOR936-14	Ampedus melonii	12.000359
Ampedus	PSFOR338-13	Ampedus nigerrimus	PSFOR932-14	Ampedus nemoralis	10.756238
Ampedus	PSFOR338-13	Ampedus nigerrimus	PSFOR528-13	Ampedus nemoralis	10.97588
Ampedus	PSFOR338-13	Ampedus nigerrimus	PSFOR542-13	Ampedus nemoralis	10.939387
Ampedus	PSFOR851-13	Ampedus nigerrimus	PSFOR721-13	Ampedus aurilegulus	10.525456
Ampedus	PSFOR851-13	Ampedus nigerrimus	PSFOR852-13	Ampedus aurilegulus	11.689867
Ampedus	PSFOR851-13	Ampedus nigerrimus	PSFOR722-13	Ampedus balteatus	11.318123
Ampedus	PSFOR851-13	Ampedus nigerrimus	PSFOR957-14	Ampedus balteatus	11.328965
Ampedus	PSFOR851-13	Ampedus nigerrimus	PSFOR838-13	Ampedus balteatus	11.405221
Ampedus	PSFOR851-13	Ampedus nigerrimus	PSFOR1056-14	Ampedus balteatus	12.041258
Ampedus	PSFOR851-13	Ampedus nigerrimus	PSFOR834-13	Ampedus brunnicornis	12.561111
Ampedus	PSFOR851-13	Ampedus nigerrimus	PSFOR737-13	Ampedus brunnicornis	12.561111
Ampedus	PSFOR851-13	Ampedus nigerrimus	PSFOR723-13	Ampedus cardinalis	12.1771345
Ampedus	PSFOR851-13	Ampedus nigerrimus	PSFOR847-13	Ampedus cardinalis	11.814828
Ampedus	PSFOR851-13	Ampedus nigerrimus	PSFOR734-13	Ampedus cinnabarinus	11.095665
Ampedus	PSFOR851-13	Ampedus nigerrimus	PSFOR827-13	Ampedus elongatulus	11.143783
Ampedus	PSFOR851-13	Ampedus nigerrimus	PSFOR933-14	Ampedus elongatulus	11.025019
Ampedus	PSFOR851-13	Ampedus nigerrimus	PSFOR543-13	Ampedus elongatulus	12.228941
Ampedus	PSFOR851-13	Ampedus nigerrimus	PSFOR854-13	Ampedus erythrogonus	14.198023
Ampedus	PSFOR851-13	Ampedus nigerrimus	PSFOR853-13	Ampedus erythrogonus	14.735161
Ampedus	PSFOR851-13	Ampedus nigerrimus	PSFOR726-13	Ampedus erythrogonus	14.18791
Ampedus	PSFOR851-13	Ampedus nigerrimus	PSFOR936-14	Ampedus melonii	12.000359
Ampedus	PSFOR851-13	Ampedus nigerrimus	PSFOR932-14	Ampedus nemoralis	10.756238
Ampedus	PSFOR851-13	Ampedus nigerrimus	PSFOR528-13	Ampedus nemoralis	10.97588
Ampedus	PSFOR851-13	Ampedus nigerrimus	PSFOR542-13	Ampedus nemoralis	10.939387
Ampedus	PSFOR738-13	Ampedus nigrinus	PSFOR721-13	Ampedus aurilegulus	14.097561
Ampedus	PSFOR738-13	Ampedus nigrinus	PSFOR852-13	Ampedus aurilegulus	14.606534
Ampedus	PSFOR738-13	Ampedus nigrinus	PSFOR722-13	Ampedus balteatus	11.657918
Ampedus	PSFOR738-13	Ampedus nigrinus	PSFOR957-14	Ampedus balteatus	11.4825945
Ampedus	PSFOR738-13	Ampedus nigrinus	PSFOR838-13	Ampedus balteatus	11.736347
Ampedus	PSFOR738-13	Ampedus nigrinus	PSFOR1056-14	Ampedus balteatus	12.571706
Ampedus	PSFOR738-13	Ampedus nigrinus	PSFOR834-13	Ampedus brunnicornis	12.345479
Ampedus	PSFOR738-13	Ampedus nigrinus	PSFOR737-13	Ampedus brunnicornis	12.345479
Ampedus	PSFOR738-13	Ampedus nigrinus	PSFOR723-13	Ampedus cardinalis	12.771802
Ampedus	PSFOR738-13	Ampedus nigrinus	PSFOR847-13	Ampedus cardinalis	12.571706
Ampedus	PSFOR738-13	Ampedus nigrinus	PSFOR734-13	Ampedus cinnabarinus	14.198023
Ampedus	PSFOR738-13	Ampedus nigrinus	PSFOR827-13	Ampedus elongatulus	12.986469
Ampedus	PSFOR738-13	Ampedus nigrinus	PSFOR933-14	Ampedus elongatulus	12.874131
Ampedus	PSFOR738-13	Ampedus nigrinus	PSFOR543-13	Ampedus elongatulus	11.925914
Ampedus	PSFOR738-13	Ampedus nigrinus	PSFOR854-13	Ampedus erythrogonus	16.340885
Ampedus	PSFOR738-13	Ampedus nigrinus	PSFOR853-13	Ampedus erythrogonus	16.014545
Ampedus	PSFOR738-13	Ampedus nigrinus	PSFOR726-13	Ampedus erythrogonus	16.355219
Ampedus	PSFOR738-13	Ampedus nigrinus	PSFOR936-14	Ampedus melonii	12.927611
Ampedus	PSFOR738-13	Ampedus nigrinus	PSFOR932-14	Ampedus nemoralis	12.206821
Ampedus	PSFOR738-13	Ampedus nigrinus	PSFOR528-13	Ampedus nemoralis	11.883566
Ampedus	PSFOR738-13	Ampedus nigrinus	PSFOR542-13	Ampedus nemoralis	12.019908
Ampedus	PSFOR738-13	Ampedus nigrinus	PSFOR828-13	Ampedus nigerrimus	13.106254
Ampedus	PSFOR738-13	Ampedus nigrinus	PSFOR855-13	Ampedus nigerrimus	13.666312
Ampedus	PSFOR738-13	Ampedus nigrinus	PSFOR338-13	Ampedus nigerrimus	13.4754715
Ampedus	PSFOR738-13	Ampedus nigrinus	PSFOR851-13	Ampedus nigerrimus	13.4754715
Ampedus	PSFOR959-14	Ampedus nigrinus	PSFOR721-13	Ampedus aurilegulus	14.487752
Ampedus	PSFOR959-14	Ampedus nigrinus	PSFOR852-13	Ampedus aurilegulus	14.983829
Ampedus	PSFOR959-14	Ampedus nigrinus	PSFOR722-13	Ampedus balteatus	11.833686
Ampedus	PSFOR959-14	Ampedus nigrinus	PSFOR957-14	Ampedus balteatus	11.657918
Ampedus	PSFOR959-14	Ampedus nigrinus	PSFOR838-13	Ampedus balteatus	11.913367
Ampedus	PSFOR959-14	Ampedus nigrinus	PSFOR1056-14	Ampedus balteatus	12.749432
Ampedus	PSFOR959-14	Ampedus nigrinus	PSFOR834-13	Ampedus brunnicornis	12.710197
Ampedus	PSFOR959-14	Ampedus nigrinus	PSFOR737-13	Ampedus brunnicornis	12.710197
Ampedus	PSFOR959-14	Ampedus nigrinus	PSFOR723-13	Ampedus cardinalis	12.571706
Ampedus	PSFOR959-14	Ampedus nigrinus	PSFOR847-13	Ampedus cardinalis	12.373493
Ampedus	PSFOR959-14	Ampedus nigrinus	PSFOR734-13	Ampedus cinnabarinus	14.379851
Ampedus	PSFOR959-14	Ampedus nigrinus	PSFOR827-13	Ampedus elongatulus	13.741551
Ampedus	PSFOR959-14	Ampedus nigrinus	PSFOR933-14	Ampedus elongatulus	13.43815
Ampedus	PSFOR959-14	Ampedus nigrinus	PSFOR543-13	Ampedus elongatulus	13.130898
Ampedus	PSFOR959-14	Ampedus nigrinus	PSFOR854-13	Ampedus erythrogonus	16.527046
Ampedus	PSFOR959-14	Ampedus nigrinus	PSFOR853-13	Ampedus erythrogonus	16.215593
Ampedus	PSFOR959-14	Ampedus nigrinus	PSFOR726-13	Ampedus erythrogonus	16.541285
Ampedus	PSFOR959-14	Ampedus nigrinus	PSFOR936-14	Ampedus melonii	12.917219
Ampedus	PSFOR959-14	Ampedus nigrinus	PSFOR932-14	Ampedus nemoralis	12.405597
Ampedus	PSFOR959-14	Ampedus nigrinus	PSFOR528-13	Ampedus nemoralis	12.081812
Ampedus	PSFOR959-14	Ampedus nigrinus	PSFOR542-13	Ampedus nemoralis	12.217623
Ampedus	PSFOR959-14	Ampedus nigrinus	PSFOR828-13	Ampedus nigerrimus	13.666312
Ampedus	PSFOR959-14	Ampedus nigrinus	PSFOR855-13	Ampedus nigerrimus	14.231226
Ampedus	PSFOR959-14	Ampedus nigrinus	PSFOR338-13	Ampedus nigerrimus	14.0385475
Ampedus	PSFOR959-14	Ampedus nigrinus	PSFOR851-13	Ampedus nigerrimus	14.0385475
Ampedus	PSFOR837-13	Ampedus pomonae	PSFOR721-13	Ampedus aurilegulus	12.465438
Ampedus	PSFOR837-13	Ampedus pomonae	PSFOR852-13	Ampedus aurilegulus	13.267125
Ampedus	PSFOR837-13	Ampedus pomonae	PSFOR722-13	Ampedus balteatus	12.755582
Ampedus	PSFOR837-13	Ampedus pomonae	PSFOR957-14	Ampedus balteatus	12.7674
Ampedus	PSFOR837-13	Ampedus pomonae	PSFOR838-13	Ampedus balteatus	12.861594
Ampedus	PSFOR837-13	Ampedus pomonae	PSFOR1056-14	Ampedus balteatus	13.764529
Ampedus	PSFOR837-13	Ampedus pomonae	PSFOR834-13	Ampedus brunnicornis	12.381978
Ampedus	PSFOR837-13	Ampedus pomonae	PSFOR737-13	Ampedus brunnicornis	12.381978
Ampedus	PSFOR837-13	Ampedus pomonae	PSFOR723-13	Ampedus cardinalis	12.806087
Ampedus	PSFOR837-13	Ampedus pomonae	PSFOR847-13	Ampedus cardinalis	12.586895
Ampedus	PSFOR837-13	Ampedus pomonae	PSFOR734-13	Ampedus cinnabarinus	10.624448
Ampedus	PSFOR837-13	Ampedus pomonae	PSFOR827-13	Ampedus elongatulus	11.036772
Ampedus	PSFOR837-13	Ampedus pomonae	PSFOR933-14	Ampedus elongatulus	10.706137
Ampedus	PSFOR837-13	Ampedus pomonae	PSFOR543-13	Ampedus elongatulus	11.438091
Ampedus	PSFOR837-13	Ampedus pomonae	PSFOR854-13	Ampedus erythrogonus	15.13702
Ampedus	PSFOR837-13	Ampedus pomonae	PSFOR853-13	Ampedus erythrogonus	15.053272
Ampedus	PSFOR837-13	Ampedus pomonae	PSFOR726-13	Ampedus erythrogonus	15.148454
Ampedus	PSFOR837-13	Ampedus pomonae	PSFOR936-14	Ampedus melonii	13.206737
Ampedus	PSFOR837-13	Ampedus pomonae	PSFOR932-14	Ampedus nemoralis	10.812641
Ampedus	PSFOR837-13	Ampedus pomonae	PSFOR528-13	Ampedus nemoralis	10.85187
Ampedus	PSFOR837-13	Ampedus pomonae	PSFOR542-13	Ampedus nemoralis	11.012648
Ampedus	PSFOR837-13	Ampedus pomonae	PSFOR828-13	Ampedus nigerrimus	9.807098
Ampedus	PSFOR837-13	Ampedus pomonae	PSFOR855-13	Ampedus nigerrimus	10.189798
Ampedus	PSFOR837-13	Ampedus pomonae	PSFOR338-13	Ampedus nigerrimus	9.9941025
Ampedus	PSFOR837-13	Ampedus pomonae	PSFOR851-13	Ampedus nigerrimus	9.9941025
Ampedus	PSFOR837-13	Ampedus pomonae	PSFOR738-13	Ampedus nigrinus	15.095963
Ampedus	PSFOR837-13	Ampedus pomonae	PSFOR959-14	Ampedus nigrinus	14.864143
Ampedus	PSFOR550-13	Ampedus pomorum	PSFOR721-13	Ampedus aurilegulus	11.996172
Ampedus	PSFOR550-13	Ampedus pomorum	PSFOR852-13	Ampedus aurilegulus	12.878947
Ampedus	PSFOR550-13	Ampedus pomorum	PSFOR722-13	Ampedus balteatus	13.4056225
Ampedus	PSFOR550-13	Ampedus pomorum	PSFOR957-14	Ampedus balteatus	13.1138
Ampedus	PSFOR550-13	Ampedus pomorum	PSFOR838-13	Ampedus balteatus	13.534108
Ampedus	PSFOR550-13	Ampedus pomorum	PSFOR1056-14	Ampedus balteatus	14.933475
Ampedus	PSFOR550-13	Ampedus pomorum	PSFOR834-13	Ampedus brunnicornis	11.976832
Ampedus	PSFOR550-13	Ampedus pomorum	PSFOR737-13	Ampedus brunnicornis	11.976832
Ampedus	PSFOR550-13	Ampedus pomorum	PSFOR723-13	Ampedus cardinalis	14.698428
Ampedus	PSFOR550-13	Ampedus pomorum	PSFOR847-13	Ampedus cardinalis	14.721674
Ampedus	PSFOR550-13	Ampedus pomorum	PSFOR734-13	Ampedus cinnabarinus	9.607658
Ampedus	PSFOR550-13	Ampedus pomorum	PSFOR827-13	Ampedus elongatulus	7.6835794
Ampedus	PSFOR550-13	Ampedus pomorum	PSFOR933-14	Ampedus elongatulus	7.4380474
Ampedus	PSFOR550-13	Ampedus pomorum	PSFOR543-13	Ampedus elongatulus	7.6694617
Ampedus	PSFOR550-13	Ampedus pomorum	PSFOR854-13	Ampedus erythrogonus	17.050804
Ampedus	PSFOR550-13	Ampedus pomorum	PSFOR853-13	Ampedus erythrogonus	16.728222
Ampedus	PSFOR550-13	Ampedus pomorum	PSFOR726-13	Ampedus erythrogonus	16.74432
Ampedus	PSFOR550-13	Ampedus pomorum	PSFOR936-14	Ampedus melonii	13.459776
Ampedus	PSFOR550-13	Ampedus pomorum	PSFOR932-14	Ampedus nemoralis	0.0
Ampedus	PSFOR550-13	Ampedus pomorum	PSFOR528-13	Ampedus nemoralis	0.0
Ampedus	PSFOR550-13	Ampedus pomorum	PSFOR542-13	Ampedus nemoralis	0.0
Ampedus	PSFOR550-13	Ampedus pomorum	PSFOR828-13	Ampedus nigerrimus	12.502174
Ampedus	PSFOR550-13	Ampedus pomorum	PSFOR855-13	Ampedus nigerrimus	13.440498
Ampedus	PSFOR550-13	Ampedus pomorum	PSFOR338-13	Ampedus nigerrimus	13.130898
Ampedus	PSFOR550-13	Ampedus pomorum	PSFOR851-13	Ampedus nigerrimus	13.130898
Ampedus	PSFOR550-13	Ampedus pomorum	PSFOR738-13	Ampedus nigrinus	11.015779
Ampedus	PSFOR550-13	Ampedus pomorum	PSFOR959-14	Ampedus nigrinus	11.624708
Ampedus	PSFOR550-13	Ampedus pomorum	PSFOR837-13	Ampedus pomonae	12.957907
Ampedus	PSFOR529-13	Ampedus pomorum	PSFOR721-13	Ampedus aurilegulus	11.453457
Ampedus	PSFOR529-13	Ampedus pomorum	PSFOR852-13	Ampedus aurilegulus	11.843792
Ampedus	PSFOR529-13	Ampedus pomorum	PSFOR722-13	Ampedus balteatus	11.843792
Ampedus	PSFOR529-13	Ampedus pomorum	PSFOR957-14	Ampedus balteatus	11.668124
Ampedus	PSFOR529-13	Ampedus pomorum	PSFOR838-13	Ampedus balteatus	11.934317
Ampedus	PSFOR529-13	Ampedus pomorum	PSFOR1056-14	Ampedus balteatus	12.949785
Ampedus	PSFOR529-13	Ampedus pomorum	PSFOR834-13	Ampedus brunnicornis	12.265325
Ampedus	PSFOR529-13	Ampedus pomorum	PSFOR737-13	Ampedus brunnicornis	12.265325
Ampedus	PSFOR529-13	Ampedus pomorum	PSFOR723-13	Ampedus cardinalis	12.961553
Ampedus	PSFOR529-13	Ampedus pomorum	PSFOR847-13	Ampedus cardinalis	12.7836685
Ampedus	PSFOR529-13	Ampedus pomorum	PSFOR734-13	Ampedus cinnabarinus	10.030272
Ampedus	PSFOR529-13	Ampedus pomorum	PSFOR827-13	Ampedus elongatulus	6.953132
Ampedus	PSFOR529-13	Ampedus pomorum	PSFOR933-14	Ampedus elongatulus	6.64777
Ampedus	PSFOR529-13	Ampedus pomorum	PSFOR543-13	Ampedus elongatulus	7.6694617
Ampedus	PSFOR529-13	Ampedus pomorum	PSFOR854-13	Ampedus erythrogonus	17.290535
Ampedus	PSFOR529-13	Ampedus pomorum	PSFOR853-13	Ampedus erythrogonus	16.402512
Ampedus	PSFOR529-13	Ampedus pomorum	PSFOR726-13	Ampedus erythrogonus	17.102468
Ampedus	PSFOR529-13	Ampedus pomorum	PSFOR936-14	Ampedus melonii	12.594275
Ampedus	PSFOR529-13	Ampedus pomorum	PSFOR932-14	Ampedus nemoralis	0.15313807
Ampedus	PSFOR529-13	Ampedus pomorum	PSFOR528-13	Ampedus nemoralis	0.0
Ampedus	PSFOR529-13	Ampedus pomorum	PSFOR542-13	Ampedus nemoralis	0.0
Ampedus	PSFOR529-13	Ampedus pomorum	PSFOR828-13	Ampedus nigerrimus	10.565141
Ampedus	PSFOR529-13	Ampedus pomorum	PSFOR855-13	Ampedus nigerrimus	11.123214
Ampedus	PSFOR529-13	Ampedus pomorum	PSFOR338-13	Ampedus nigerrimus	10.939387
Ampedus	PSFOR529-13	Ampedus pomorum	PSFOR851-13	Ampedus nigerrimus	10.939387
Ampedus	PSFOR529-13	Ampedus pomorum	PSFOR738-13	Ampedus nigrinus	12.019908
Ampedus	PSFOR529-13	Ampedus pomorum	PSFOR959-14	Ampedus nigrinus	12.217623
Ampedus	PSFOR529-13	Ampedus pomorum	PSFOR837-13	Ampedus pomonae	11.012648
Ampedus	PSFOR532-13	Ampedus pomorum	PSFOR721-13	Ampedus aurilegulus	11.293222
Ampedus	PSFOR532-13	Ampedus pomorum	PSFOR852-13	Ampedus aurilegulus	11.689867
Ampedus	PSFOR532-13	Ampedus pomorum	PSFOR722-13	Ampedus balteatus	10.582811
Ampedus	PSFOR532-13	Ampedus pomorum	PSFOR957-14	Ampedus balteatus	10.409823
Ampedus	PSFOR532-13	Ampedus pomorum	PSFOR838-13	Ampedus balteatus	10.66309
Ampedus	PSFOR532-13	Ampedus pomorum	PSFOR1056-14	Ampedus balteatus	11.668124
Ampedus	PSFOR532-13	Ampedus pomorum	PSFOR834-13	Ampedus brunnicornis	11.340248
Ampedus	PSFOR532-13	Ampedus pomorum	PSFOR737-13	Ampedus brunnicornis	11.340248
Ampedus	PSFOR532-13	Ampedus pomorum	PSFOR723-13	Ampedus cardinalis	12.429256
Ampedus	PSFOR532-13	Ampedus pomorum	PSFOR847-13	Ampedus cardinalis	12.252727
Ampedus	PSFOR532-13	Ampedus pomorum	PSFOR734-13	Ampedus cinnabarinus	10.582811
Ampedus	PSFOR532-13	Ampedus pomorum	PSFOR827-13	Ampedus elongatulus	7.5023255
Ampedus	PSFOR532-13	Ampedus pomorum	PSFOR933-14	Ampedus elongatulus	7.0211554
Ampedus	PSFOR532-13	Ampedus pomorum	PSFOR543-13	Ampedus elongatulus	7.128959
Ampedus	PSFOR532-13	Ampedus pomorum	PSFOR854-13	Ampedus erythrogonus	16.079027
Ampedus	PSFOR532-13	Ampedus pomorum	PSFOR853-13	Ampedus erythrogonus	15.319973
Ampedus	PSFOR532-13	Ampedus pomorum	PSFOR726-13	Ampedus erythrogonus	16.09048
Ampedus	PSFOR532-13	Ampedus pomorum	PSFOR936-14	Ampedus melonii	12.252727
Ampedus	PSFOR532-13	Ampedus pomorum	PSFOR932-14	Ampedus nemoralis	2.6584613
Ampedus	PSFOR532-13	Ampedus pomorum	PSFOR528-13	Ampedus nemoralis	2.1860259
Ampedus	PSFOR532-13	Ampedus pomorum	PSFOR542-13	Ampedus nemoralis	2.4982033
Ampedus	PSFOR532-13	Ampedus pomorum	PSFOR828-13	Ampedus nigerrimus	11.328965
Ampedus	PSFOR532-13	Ampedus pomorum	PSFOR855-13	Ampedus nigerrimus	11.901006
Ampedus	PSFOR532-13	Ampedus pomorum	PSFOR338-13	Ampedus nigerrimus	11.713387
Ampedus	PSFOR532-13	Ampedus pomorum	PSFOR851-13	Ampedus nigerrimus	11.713387
Ampedus	PSFOR532-13	Ampedus pomorum	PSFOR738-13	Ampedus nigrinus	12.594275
Ampedus	PSFOR532-13	Ampedus pomorum	PSFOR959-14	Ampedus nigrinus	13.152027
Ampedus	PSFOR532-13	Ampedus pomorum	PSFOR837-13	Ampedus pomonae	10.448396
Ampedus	PSFOR530-13	Ampedus pomorum	PSFOR721-13	Ampedus aurilegulus	11.996172
Ampedus	PSFOR530-13	Ampedus pomorum	PSFOR852-13	Ampedus aurilegulus	12.878947
Ampedus	PSFOR530-13	Ampedus pomorum	PSFOR722-13	Ampedus balteatus	13.4056225
Ampedus	PSFOR530-13	Ampedus pomorum	PSFOR957-14	Ampedus balteatus	13.1138
Ampedus	PSFOR530-13	Ampedus pomorum	PSFOR838-13	Ampedus balteatus	13.534108
Ampedus	PSFOR530-13	Ampedus pomorum	PSFOR1056-14	Ampedus balteatus	14.933475
Ampedus	PSFOR530-13	Ampedus pomorum	PSFOR834-13	Ampedus brunnicornis	11.976832
Ampedus	PSFOR530-13	Ampedus pomorum	PSFOR737-13	Ampedus brunnicornis	11.976832
Ampedus	PSFOR530-13	Ampedus pomorum	PSFOR723-13	Ampedus cardinalis	14.698428
Ampedus	PSFOR530-13	Ampedus pomorum	PSFOR847-13	Ampedus cardinalis	14.721674
Ampedus	PSFOR530-13	Ampedus pomorum	PSFOR734-13	Ampedus cinnabarinus	9.607658
Ampedus	PSFOR530-13	Ampedus pomorum	PSFOR827-13	Ampedus elongatulus	7.6835794
Ampedus	PSFOR530-13	Ampedus pomorum	PSFOR933-14	Ampedus elongatulus	7.4380474
Ampedus	PSFOR530-13	Ampedus pomorum	PSFOR543-13	Ampedus elongatulus	7.6694617
Ampedus	PSFOR530-13	Ampedus pomorum	PSFOR854-13	Ampedus erythrogonus	17.050804
Ampedus	PSFOR530-13	Ampedus pomorum	PSFOR853-13	Ampedus erythrogonus	16.728222
Ampedus	PSFOR530-13	Ampedus pomorum	PSFOR726-13	Ampedus erythrogonus	16.74432
Ampedus	PSFOR530-13	Ampedus pomorum	PSFOR936-14	Ampedus melonii	13.459776
Ampedus	PSFOR530-13	Ampedus pomorum	PSFOR932-14	Ampedus nemoralis	0.0
Ampedus	PSFOR530-13	Ampedus pomorum	PSFOR528-13	Ampedus nemoralis	0.0
Ampedus	PSFOR530-13	Ampedus pomorum	PSFOR542-13	Ampedus nemoralis	0.0
Ampedus	PSFOR530-13	Ampedus pomorum	PSFOR828-13	Ampedus nigerrimus	12.502174
Ampedus	PSFOR530-13	Ampedus pomorum	PSFOR855-13	Ampedus nigerrimus	13.440498
Ampedus	PSFOR530-13	Ampedus pomorum	PSFOR338-13	Ampedus nigerrimus	13.130898
Ampedus	PSFOR530-13	Ampedus pomorum	PSFOR851-13	Ampedus nigerrimus	13.130898
Ampedus	PSFOR530-13	Ampedus pomorum	PSFOR738-13	Ampedus nigrinus	11.015779
Ampedus	PSFOR530-13	Ampedus pomorum	PSFOR959-14	Ampedus nigrinus	11.624708
Ampedus	PSFOR530-13	Ampedus pomorum	PSFOR837-13	Ampedus pomonae	12.957907
Ampedus	PSFOR546-13	Ampedus pomorum	PSFOR721-13	Ampedus aurilegulus	11.646883
Ampedus	PSFOR546-13	Ampedus pomorum	PSFOR852-13	Ampedus aurilegulus	12.030358
Ampedus	PSFOR546-13	Ampedus pomorum	PSFOR722-13	Ampedus balteatus	12.030358
Ampedus	PSFOR546-13	Ampedus pomorum	PSFOR957-14	Ampedus balteatus	11.854345
Ampedus	PSFOR546-13	Ampedus pomorum	PSFOR838-13	Ampedus balteatus	12.1226425
Ampedus	PSFOR546-13	Ampedus pomorum	PSFOR1056-14	Ampedus balteatus	13.139897
Ampedus	PSFOR546-13	Ampedus pomorum	PSFOR834-13	Ampedus brunnicornis	12.6448345
Ampedus	PSFOR546-13	Ampedus pomorum	PSFOR737-13	Ampedus brunnicornis	12.6448345
Ampedus	PSFOR546-13	Ampedus pomorum	PSFOR723-13	Ampedus cardinalis	13.343234
Ampedus	PSFOR546-13	Ampedus pomorum	PSFOR847-13	Ampedus cardinalis	13.164624
Ampedus	PSFOR546-13	Ampedus pomorum	PSFOR734-13	Ampedus cinnabarinus	10.391939
Ampedus	PSFOR546-13	Ampedus pomorum	PSFOR827-13	Ampedus elongatulus	7.300353
Ampedus	PSFOR546-13	Ampedus pomorum	PSFOR933-14	Ampedus elongatulus	6.9949946
Ampedus	PSFOR546-13	Ampedus pomorum	PSFOR543-13	Ampedus elongatulus	8.242534
Ampedus	PSFOR546-13	Ampedus pomorum	PSFOR854-13	Ampedus erythrogonus	17.290535
Ampedus	PSFOR546-13	Ampedus pomorum	PSFOR853-13	Ampedus erythrogonus	16.402512
Ampedus	PSFOR546-13	Ampedus pomorum	PSFOR726-13	Ampedus erythrogonus	17.102468
Ampedus	PSFOR546-13	Ampedus pomorum	PSFOR936-14	Ampedus melonii	12.973783
Ampedus	PSFOR546-13	Ampedus pomorum	PSFOR932-14	Ampedus nemoralis	0.4608315
Ampedus	PSFOR546-13	Ampedus pomorum	PSFOR528-13	Ampedus nemoralis	0.30769417
Ampedus	PSFOR546-13	Ampedus pomorum	PSFOR542-13	Ampedus nemoralis	0.3067496
Ampedus	PSFOR546-13	Ampedus pomorum	PSFOR828-13	Ampedus nigerrimus	10.747288
Ampedus	PSFOR546-13	Ampedus pomorum	PSFOR855-13	Ampedus nigerrimus	11.307712
Ampedus	PSFOR546-13	Ampedus pomorum	PSFOR338-13	Ampedus nigerrimus	11.123214
Ampedus	PSFOR546-13	Ampedus pomorum	PSFOR851-13	Ampedus nigerrimus	11.123214
Ampedus	PSFOR546-13	Ampedus pomorum	PSFOR738-13	Ampedus nigrinus	12.394437
Ampedus	PSFOR546-13	Ampedus pomorum	PSFOR959-14	Ampedus nigrinus	12.594275
Ampedus	PSFOR546-13	Ampedus pomorum	PSFOR837-13	Ampedus pomonae	11.012648
Ampedus	PSFOR547-13	Ampedus pomorum	PSFOR721-13	Ampedus aurilegulus	11.453457
Ampedus	PSFOR547-13	Ampedus pomorum	PSFOR852-13	Ampedus aurilegulus	11.843792
Ampedus	PSFOR547-13	Ampedus pomorum	PSFOR722-13	Ampedus balteatus	11.843792
Ampedus	PSFOR547-13	Ampedus pomorum	PSFOR957-14	Ampedus balteatus	11.668124
Ampedus	PSFOR547-13	Ampedus pomorum	PSFOR838-13	Ampedus balteatus	11.934317
Ampedus	PSFOR547-13	Ampedus pomorum	PSFOR1056-14	Ampedus balteatus	12.949785
Ampedus	PSFOR547-13	Ampedus pomorum	PSFOR834-13	Ampedus brunnicornis	12.265325
Ampedus	PSFOR547-13	Ampedus pomorum	PSFOR737-13	Ampedus brunnicornis	12.265325
Ampedus	PSFOR547-13	Ampedus pomorum	PSFOR723-13	Ampedus cardinalis	12.961553
Ampedus	PSFOR547-13	Ampedus pomorum	PSFOR847-13	Ampedus cardinalis	12.7836685
Ampedus	PSFOR547-13	Ampedus pomorum	PSFOR734-13	Ampedus cinnabarinus	10.030272
Ampedus	PSFOR547-13	Ampedus pomorum	PSFOR827-13	Ampedus elongatulus	6.953132
Ampedus	PSFOR547-13	Ampedus pomorum	PSFOR933-14	Ampedus elongatulus	6.64777
Ampedus	PSFOR547-13	Ampedus pomorum	PSFOR543-13	Ampedus elongatulus	7.6694617
Ampedus	PSFOR547-13	Ampedus pomorum	PSFOR854-13	Ampedus erythrogonus	17.290535
Ampedus	PSFOR547-13	Ampedus pomorum	PSFOR853-13	Ampedus erythrogonus	16.402512
Ampedus	PSFOR547-13	Ampedus pomorum	PSFOR726-13	Ampedus erythrogonus	17.102468
Ampedus	PSFOR547-13	Ampedus pomorum	PSFOR936-14	Ampedus melonii	12.594275
Ampedus	PSFOR547-13	Ampedus pomorum	PSFOR932-14	Ampedus nemoralis	0.15313807
Ampedus	PSFOR547-13	Ampedus pomorum	PSFOR528-13	Ampedus nemoralis	0.0
Ampedus	PSFOR547-13	Ampedus pomorum	PSFOR542-13	Ampedus nemoralis	0.0
Ampedus	PSFOR547-13	Ampedus pomorum	PSFOR828-13	Ampedus nigerrimus	10.565141
Ampedus	PSFOR547-13	Ampedus pomorum	PSFOR855-13	Ampedus nigerrimus	11.123214
Ampedus	PSFOR547-13	Ampedus pomorum	PSFOR338-13	Ampedus nigerrimus	10.939387
Ampedus	PSFOR547-13	Ampedus pomorum	PSFOR851-13	Ampedus nigerrimus	10.939387
Ampedus	PSFOR547-13	Ampedus pomorum	PSFOR738-13	Ampedus nigrinus	12.019908
Ampedus	PSFOR547-13	Ampedus pomorum	PSFOR959-14	Ampedus nigrinus	12.217623
Ampedus	PSFOR547-13	Ampedus pomorum	PSFOR837-13	Ampedus pomonae	11.012648
Ampedus	PSFOR548-13	Ampedus pomorum	PSFOR721-13	Ampedus aurilegulus	11.453457
Ampedus	PSFOR548-13	Ampedus pomorum	PSFOR852-13	Ampedus aurilegulus	11.843792
Ampedus	PSFOR548-13	Ampedus pomorum	PSFOR722-13	Ampedus balteatus	11.843792
Ampedus	PSFOR548-13	Ampedus pomorum	PSFOR957-14	Ampedus balteatus	11.668124
Ampedus	PSFOR548-13	Ampedus pomorum	PSFOR838-13	Ampedus balteatus	11.934317
Ampedus	PSFOR548-13	Ampedus pomorum	PSFOR1056-14	Ampedus balteatus	12.949785
Ampedus	PSFOR548-13	Ampedus pomorum	PSFOR834-13	Ampedus brunnicornis	12.265325
Ampedus	PSFOR548-13	Ampedus pomorum	PSFOR737-13	Ampedus brunnicornis	12.265325
Ampedus	PSFOR548-13	Ampedus pomorum	PSFOR723-13	Ampedus cardinalis	12.961553
Ampedus	PSFOR548-13	Ampedus pomorum	PSFOR847-13	Ampedus cardinalis	12.7836685
Ampedus	PSFOR548-13	Ampedus pomorum	PSFOR734-13	Ampedus cinnabarinus	10.030272
Ampedus	PSFOR548-13	Ampedus pomorum	PSFOR827-13	Ampedus elongatulus	6.953132
Ampedus	PSFOR548-13	Ampedus pomorum	PSFOR933-14	Ampedus elongatulus	6.64777
Ampedus	PSFOR548-13	Ampedus pomorum	PSFOR543-13	Ampedus elongatulus	7.6694617
Ampedus	PSFOR548-13	Ampedus pomorum	PSFOR854-13	Ampedus erythrogonus	17.290535
Ampedus	PSFOR548-13	Ampedus pomorum	PSFOR853-13	Ampedus erythrogonus	16.402512
Ampedus	PSFOR548-13	Ampedus pomorum	PSFOR726-13	Ampedus erythrogonus	17.102468
Ampedus	PSFOR548-13	Ampedus pomorum	PSFOR936-14	Ampedus melonii	12.594275
Ampedus	PSFOR548-13	Ampedus pomorum	PSFOR932-14	Ampedus nemoralis	0.15313807
Ampedus	PSFOR548-13	Ampedus pomorum	PSFOR528-13	Ampedus nemoralis	0.0
Ampedus	PSFOR548-13	Ampedus pomorum	PSFOR542-13	Ampedus nemoralis	0.0
Ampedus	PSFOR548-13	Ampedus pomorum	PSFOR828-13	Ampedus nigerrimus	10.565141
Ampedus	PSFOR548-13	Ampedus pomorum	PSFOR855-13	Ampedus nigerrimus	11.123214
Ampedus	PSFOR548-13	Ampedus pomorum	PSFOR338-13	Ampedus nigerrimus	10.939387
Ampedus	PSFOR548-13	Ampedus pomorum	PSFOR851-13	Ampedus nigerrimus	10.939387
Ampedus	PSFOR548-13	Ampedus pomorum	PSFOR738-13	Ampedus nigrinus	12.019908
Ampedus	PSFOR548-13	Ampedus pomorum	PSFOR959-14	Ampedus nigrinus	12.217623
Ampedus	PSFOR548-13	Ampedus pomorum	PSFOR837-13	Ampedus pomonae	11.012648
Ampedus	PSFOR544-13	Ampedus pomorum	PSFOR721-13	Ampedus aurilegulus	11.359747
Ampedus	PSFOR544-13	Ampedus pomorum	PSFOR852-13	Ampedus aurilegulus	11.768463
Ampedus	PSFOR544-13	Ampedus pomorum	PSFOR722-13	Ampedus balteatus	11.961887
Ampedus	PSFOR544-13	Ampedus pomorum	PSFOR957-14	Ampedus balteatus	11.961887
Ampedus	PSFOR544-13	Ampedus pomorum	PSFOR838-13	Ampedus balteatus	12.057095
Ampedus	PSFOR544-13	Ampedus pomorum	PSFOR1056-14	Ampedus balteatus	13.112804
Ampedus	PSFOR544-13	Ampedus pomorum	PSFOR834-13	Ampedus brunnicornis	12.599092
Ampedus	PSFOR544-13	Ampedus pomorum	PSFOR737-13	Ampedus brunnicornis	12.599092
Ampedus	PSFOR544-13	Ampedus pomorum	PSFOR723-13	Ampedus cardinalis	13.52298
Ampedus	PSFOR544-13	Ampedus pomorum	PSFOR847-13	Ampedus cardinalis	13.138409
Ampedus	PSFOR544-13	Ampedus pomorum	PSFOR734-13	Ampedus cinnabarinus	10.263816
Ampedus	PSFOR544-13	Ampedus pomorum	PSFOR827-13	Ampedus elongatulus	7.054096
Ampedus	PSFOR544-13	Ampedus pomorum	PSFOR933-14	Ampedus elongatulus	6.737117
Ampedus	PSFOR544-13	Ampedus pomorum	PSFOR543-13	Ampedus elongatulus	8.190208
Ampedus	PSFOR544-13	Ampedus pomorum	PSFOR854-13	Ampedus erythrogonus	17.424545
Ampedus	PSFOR544-13	Ampedus pomorum	PSFOR853-13	Ampedus erythrogonus	16.509962
Ampedus	PSFOR544-13	Ampedus pomorum	PSFOR726-13	Ampedus erythrogonus	17.228975
Ampedus	PSFOR544-13	Ampedus pomorum	PSFOR936-14	Ampedus melonii	13.138409
Ampedus	PSFOR544-13	Ampedus pomorum	PSFOR932-14	Ampedus nemoralis	0.4784725
Ampedus	PSFOR544-13	Ampedus pomorum	PSFOR528-13	Ampedus nemoralis	0.31948915
Ampedus	PSFOR544-13	Ampedus pomorum	PSFOR542-13	Ampedus nemoralis	0.3184724
Ampedus	PSFOR544-13	Ampedus pomorum	PSFOR828-13	Ampedus nigerrimus	10.632041
Ampedus	PSFOR544-13	Ampedus pomorum	PSFOR855-13	Ampedus nigerrimus	11.212609
Ampedus	PSFOR544-13	Ampedus pomorum	PSFOR338-13	Ampedus nigerrimus	11.021407
Ampedus	PSFOR544-13	Ampedus pomorum	PSFOR851-13	Ampedus nigerrimus	11.021407
Ampedus	PSFOR544-13	Ampedus pomorum	PSFOR738-13	Ampedus nigrinus	12.719102
Ampedus	PSFOR544-13	Ampedus pomorum	PSFOR959-14	Ampedus nigrinus	12.927734
Ampedus	PSFOR544-13	Ampedus pomorum	PSFOR837-13	Ampedus pomonae	10.070619
Ampedus	PSFOR735-13	Ampedus praestus	PSFOR721-13	Ampedus aurilegulus	12.013772
Ampedus	PSFOR735-13	Ampedus praestus	PSFOR852-13	Ampedus aurilegulus	12.771802
Ampedus	PSFOR735-13	Ampedus praestus	PSFOR722-13	Ampedus balteatus	7.097885
Ampedus	PSFOR735-13	Ampedus praestus	PSFOR957-14	Ampedus balteatus	7.2641716
Ampedus	PSFOR735-13	Ampedus praestus	PSFOR838-13	Ampedus balteatus	7.144039
Ampedus	PSFOR735-13	Ampedus praestus	PSFOR1056-14	Ampedus balteatus	7.952604
Ampedus	PSFOR735-13	Ampedus praestus	PSFOR834-13	Ampedus brunnicornis	6.7959013
Ampedus	PSFOR735-13	Ampedus praestus	PSFOR737-13	Ampedus brunnicornis	6.7959013
Ampedus	PSFOR735-13	Ampedus praestus	PSFOR723-13	Ampedus cardinalis	1.2343117
Ampedus	PSFOR735-13	Ampedus praestus	PSFOR847-13	Ampedus cardinalis	1.3918257
Ampedus	PSFOR735-13	Ampedus praestus	PSFOR734-13	Ampedus cinnabarinus	12.019908
Ampedus	PSFOR735-13	Ampedus praestus	PSFOR827-13	Ampedus elongatulus	12.030358
Ampedus	PSFOR735-13	Ampedus praestus	PSFOR933-14	Ampedus elongatulus	12.102194
Ampedus	PSFOR735-13	Ampedus praestus	PSFOR543-13	Ampedus elongatulus	13.130898
Ampedus	PSFOR735-13	Ampedus praestus	PSFOR854-13	Ampedus erythrogonus	15.277873
Ampedus	PSFOR735-13	Ampedus praestus	PSFOR853-13	Ampedus erythrogonus	14.47187
Ampedus	PSFOR735-13	Ampedus praestus	PSFOR726-13	Ampedus erythrogonus	15.286801
Ampedus	PSFOR735-13	Ampedus praestus	PSFOR936-14	Ampedus melonii	0.0
Ampedus	PSFOR735-13	Ampedus praestus	PSFOR932-14	Ampedus nemoralis	12.7836685
Ampedus	PSFOR735-13	Ampedus praestus	PSFOR528-13	Ampedus nemoralis	12.636881
Ampedus	PSFOR735-13	Ampedus praestus	PSFOR542-13	Ampedus nemoralis	12.594275
Ampedus	PSFOR735-13	Ampedus praestus	PSFOR828-13	Ampedus nigerrimus	11.991259
Ampedus	PSFOR735-13	Ampedus praestus	PSFOR855-13	Ampedus nigerrimus	12.186576
Ampedus	PSFOR735-13	Ampedus praestus	PSFOR338-13	Ampedus nigerrimus	12.000359
Ampedus	PSFOR735-13	Ampedus praestus	PSFOR851-13	Ampedus nigerrimus	12.000359
Ampedus	PSFOR735-13	Ampedus praestus	PSFOR738-13	Ampedus nigrinus	12.927611
Ampedus	PSFOR735-13	Ampedus praestus	PSFOR959-14	Ampedus nigrinus	12.917219
Ampedus	PSFOR735-13	Ampedus praestus	PSFOR837-13	Ampedus pomonae	13.206737
Ampedus	PSFOR735-13	Ampedus praestus	PSFOR550-13	Ampedus pomorum	13.459776
Ampedus	PSFOR735-13	Ampedus praestus	PSFOR529-13	Ampedus pomorum	12.594275
Ampedus	PSFOR735-13	Ampedus praestus	PSFOR532-13	Ampedus pomorum	12.252727
Ampedus	PSFOR735-13	Ampedus praestus	PSFOR530-13	Ampedus pomorum	13.459776
Ampedus	PSFOR735-13	Ampedus praestus	PSFOR546-13	Ampedus pomorum	12.973783
Ampedus	PSFOR735-13	Ampedus praestus	PSFOR547-13	Ampedus pomorum	12.594275
Ampedus	PSFOR735-13	Ampedus praestus	PSFOR548-13	Ampedus pomorum	12.594275
Ampedus	PSFOR735-13	Ampedus praestus	PSFOR544-13	Ampedus pomorum	13.138409
Ampedus	PSFOR848-13	Ampedus praestus	PSFOR721-13	Ampedus aurilegulus	12.208701
Ampedus	PSFOR848-13	Ampedus praestus	PSFOR852-13	Ampedus aurilegulus	12.961553
Ampedus	PSFOR848-13	Ampedus praestus	PSFOR722-13	Ampedus balteatus	7.2706
Ampedus	PSFOR848-13	Ampedus praestus	PSFOR957-14	Ampedus balteatus	7.091758
Ampedus	PSFOR848-13	Ampedus praestus	PSFOR838-13	Ampedus balteatus	7.317952
Ampedus	PSFOR848-13	Ampedus praestus	PSFOR1056-14	Ampedus balteatus	8.127733
Ampedus	PSFOR848-13	Ampedus praestus	PSFOR834-13	Ampedus brunnicornis	6.969211
Ampedus	PSFOR848-13	Ampedus praestus	PSFOR737-13	Ampedus brunnicornis	6.969211
Ampedus	PSFOR848-13	Ampedus praestus	PSFOR723-13	Ampedus cardinalis	1.2343117
Ampedus	PSFOR848-13	Ampedus praestus	PSFOR847-13	Ampedus cardinalis	1.3918257
Ampedus	PSFOR848-13	Ampedus praestus	PSFOR734-13	Ampedus cinnabarinus	12.206821
Ampedus	PSFOR848-13	Ampedus praestus	PSFOR827-13	Ampedus elongatulus	12.030358
Ampedus	PSFOR848-13	Ampedus praestus	PSFOR933-14	Ampedus elongatulus	12.102194
Ampedus	PSFOR848-13	Ampedus praestus	PSFOR543-13	Ampedus elongatulus	13.130898
Ampedus	PSFOR848-13	Ampedus praestus	PSFOR854-13	Ampedus erythrogonus	15.084824
Ampedus	PSFOR848-13	Ampedus praestus	PSFOR853-13	Ampedus erythrogonus	14.264833
Ampedus	PSFOR848-13	Ampedus praestus	PSFOR726-13	Ampedus erythrogonus	15.093379
Ampedus	PSFOR848-13	Ampedus praestus	PSFOR936-14	Ampedus melonii	0.15313807
Ampedus	PSFOR848-13	Ampedus praestus	PSFOR932-14	Ampedus nemoralis	12.7836685
Ampedus	PSFOR848-13	Ampedus praestus	PSFOR528-13	Ampedus nemoralis	12.636881
Ampedus	PSFOR848-13	Ampedus praestus	PSFOR542-13	Ampedus nemoralis	12.594275
Ampedus	PSFOR848-13	Ampedus praestus	PSFOR828-13	Ampedus nigerrimus	12.1771345
Ampedus	PSFOR848-13	Ampedus praestus	PSFOR855-13	Ampedus nigerrimus	12.373493
Ampedus	PSFOR848-13	Ampedus praestus	PSFOR338-13	Ampedus nigerrimus	12.186576
Ampedus	PSFOR848-13	Ampedus praestus	PSFOR851-13	Ampedus nigerrimus	12.186576
Ampedus	PSFOR848-13	Ampedus praestus	PSFOR738-13	Ampedus nigrinus	12.927611
Ampedus	PSFOR848-13	Ampedus praestus	PSFOR959-14	Ampedus nigrinus	12.917219
Ampedus	PSFOR848-13	Ampedus praestus	PSFOR837-13	Ampedus pomonae	13.415069
Ampedus	PSFOR848-13	Ampedus praestus	PSFOR550-13	Ampedus pomorum	13.459776
Ampedus	PSFOR848-13	Ampedus praestus	PSFOR529-13	Ampedus pomorum	12.594275
Ampedus	PSFOR848-13	Ampedus praestus	PSFOR532-13	Ampedus pomorum	12.252727
Ampedus	PSFOR848-13	Ampedus praestus	PSFOR530-13	Ampedus pomorum	13.459776
Ampedus	PSFOR848-13	Ampedus praestus	PSFOR546-13	Ampedus pomorum	12.973783
Ampedus	PSFOR848-13	Ampedus praestus	PSFOR547-13	Ampedus pomorum	12.594275
Ampedus	PSFOR848-13	Ampedus praestus	PSFOR548-13	Ampedus pomorum	12.594275
Ampedus	PSFOR848-13	Ampedus praestus	PSFOR544-13	Ampedus pomorum	13.138409
Ampedus	PSFOR842-13	Ampedus quercicola	PSFOR721-13	Ampedus aurilegulus	11.558759
Ampedus	PSFOR842-13	Ampedus quercicola	PSFOR852-13	Ampedus aurilegulus	11.596905
Ampedus	PSFOR842-13	Ampedus quercicola	PSFOR722-13	Ampedus balteatus	12.603991
Ampedus	PSFOR842-13	Ampedus quercicola	PSFOR957-14	Ampedus balteatus	12.61554
Ampedus	PSFOR842-13	Ampedus quercicola	PSFOR838-13	Ampedus balteatus	12.522666
Ampedus	PSFOR842-13	Ampedus quercicola	PSFOR1056-14	Ampedus balteatus	13.365912
Ampedus	PSFOR842-13	Ampedus quercicola	PSFOR834-13	Ampedus brunnicornis	12.394288
Ampedus	PSFOR842-13	Ampedus quercicola	PSFOR737-13	Ampedus brunnicornis	12.394288
Ampedus	PSFOR842-13	Ampedus quercicola	PSFOR723-13	Ampedus cardinalis	14.051221
Ampedus	PSFOR842-13	Ampedus quercicola	PSFOR847-13	Ampedus cardinalis	13.487718
Ampedus	PSFOR842-13	Ampedus quercicola	PSFOR734-13	Ampedus cinnabarinus	8.671023
Ampedus	PSFOR842-13	Ampedus quercicola	PSFOR827-13	Ampedus elongatulus	12.503141
Ampedus	PSFOR842-13	Ampedus quercicola	PSFOR933-14	Ampedus elongatulus	12.389671
Ampedus	PSFOR842-13	Ampedus quercicola	PSFOR543-13	Ampedus elongatulus	12.071526
Ampedus	PSFOR842-13	Ampedus quercicola	PSFOR854-13	Ampedus erythrogonus	16.355314
Ampedus	PSFOR842-13	Ampedus quercicola	PSFOR853-13	Ampedus erythrogonus	16.231167
Ampedus	PSFOR842-13	Ampedus quercicola	PSFOR726-13	Ampedus erythrogonus	16.341923
Ampedus	PSFOR842-13	Ampedus quercicola	PSFOR936-14	Ampedus melonii	12.939003
Ampedus	PSFOR842-13	Ampedus quercicola	PSFOR932-14	Ampedus nemoralis	11.721067
Ampedus	PSFOR842-13	Ampedus quercicola	PSFOR528-13	Ampedus nemoralis	11.9489155
Ampedus	PSFOR842-13	Ampedus quercicola	PSFOR542-13	Ampedus nemoralis	11.908686
Ampedus	PSFOR842-13	Ampedus quercicola	PSFOR828-13	Ampedus nigerrimus	10.7741165
Ampedus	PSFOR842-13	Ampedus quercicola	PSFOR855-13	Ampedus nigerrimus	10.967361
Ampedus	PSFOR842-13	Ampedus quercicola	PSFOR338-13	Ampedus nigerrimus	10.783537
Ampedus	PSFOR842-13	Ampedus quercicola	PSFOR851-13	Ampedus nigerrimus	10.783537
Ampedus	PSFOR842-13	Ampedus quercicola	PSFOR738-13	Ampedus nigrinus	13.8592825
Ampedus	PSFOR842-13	Ampedus quercicola	PSFOR959-14	Ampedus nigrinus	13.658075
Ampedus	PSFOR842-13	Ampedus quercicola	PSFOR837-13	Ampedus pomonae	10.467302
Ampedus	PSFOR842-13	Ampedus quercicola	PSFOR550-13	Ampedus pomorum	12.049714
Ampedus	PSFOR842-13	Ampedus quercicola	PSFOR529-13	Ampedus pomorum	11.908686
Ampedus	PSFOR842-13	Ampedus quercicola	PSFOR532-13	Ampedus pomorum	12.326641
Ampedus	PSFOR842-13	Ampedus quercicola	PSFOR530-13	Ampedus pomorum	12.049714
Ampedus	PSFOR842-13	Ampedus quercicola	PSFOR546-13	Ampedus pomorum	12.09701
Ampedus	PSFOR842-13	Ampedus quercicola	PSFOR547-13	Ampedus pomorum	11.908686
Ampedus	PSFOR842-13	Ampedus quercicola	PSFOR548-13	Ampedus pomorum	11.908686
Ampedus	PSFOR842-13	Ampedus quercicola	PSFOR544-13	Ampedus pomorum	12.017994
Ampedus	PSFOR842-13	Ampedus quercicola	PSFOR735-13	Ampedus praestus	12.939003
Ampedus	PSFOR842-13	Ampedus quercicola	PSFOR848-13	Ampedus praestus	13.128398
Ampedus	PSFOR549-13	Ampedus quercicola	PSFOR721-13	Ampedus aurilegulus	11.148609
Ampedus	PSFOR549-13	Ampedus quercicola	PSFOR852-13	Ampedus aurilegulus	11.202844
Ampedus	PSFOR549-13	Ampedus quercicola	PSFOR722-13	Ampedus balteatus	12.561111
Ampedus	PSFOR549-13	Ampedus quercicola	PSFOR957-14	Ampedus balteatus	12.571706
Ampedus	PSFOR549-13	Ampedus quercicola	PSFOR838-13	Ampedus balteatus	12.478346
Ampedus	PSFOR549-13	Ampedus quercicola	PSFOR1056-14	Ampedus balteatus	13.128224
Ampedus	PSFOR549-13	Ampedus quercicola	PSFOR834-13	Ampedus brunnicornis	12.354362
Ampedus	PSFOR549-13	Ampedus quercicola	PSFOR737-13	Ampedus brunnicornis	12.354362
Ampedus	PSFOR549-13	Ampedus quercicola	PSFOR723-13	Ampedus cardinalis	14.006448
Ampedus	PSFOR549-13	Ampedus quercicola	PSFOR847-13	Ampedus cardinalis	13.445243
Ampedus	PSFOR549-13	Ampedus quercicola	PSFOR734-13	Ampedus cinnabarinus	8.303478
Ampedus	PSFOR549-13	Ampedus quercicola	PSFOR827-13	Ampedus elongatulus	11.888676
Ampedus	PSFOR549-13	Ampedus quercicola	PSFOR933-14	Ampedus elongatulus	11.772695
Ampedus	PSFOR549-13	Ampedus quercicola	PSFOR543-13	Ampedus elongatulus	11.388257
Ampedus	PSFOR549-13	Ampedus quercicola	PSFOR854-13	Ampedus erythrogonus	15.707958
Ampedus	PSFOR549-13	Ampedus quercicola	PSFOR853-13	Ampedus erythrogonus	15.531837
Ampedus	PSFOR549-13	Ampedus quercicola	PSFOR726-13	Ampedus erythrogonus	15.696775
Ampedus	PSFOR549-13	Ampedus quercicola	PSFOR936-14	Ampedus melonii	12.897814
Ampedus	PSFOR549-13	Ampedus quercicola	PSFOR932-14	Ampedus nemoralis	11.328965
Ampedus	PSFOR549-13	Ampedus quercicola	PSFOR528-13	Ampedus nemoralis	11.553531
Ampedus	PSFOR549-13	Ampedus quercicola	PSFOR542-13	Ampedus nemoralis	11.51484
Ampedus	PSFOR549-13	Ampedus quercicola	PSFOR828-13	Ampedus nigerrimus	10.030272
Ampedus	PSFOR549-13	Ampedus quercicola	PSFOR855-13	Ampedus nigerrimus	10.219173
Ampedus	PSFOR549-13	Ampedus quercicola	PSFOR338-13	Ampedus nigerrimus	10.03834
Ampedus	PSFOR549-13	Ampedus quercicola	PSFOR851-13	Ampedus nigerrimus	10.03834
Ampedus	PSFOR549-13	Ampedus quercicola	PSFOR738-13	Ampedus nigrinus	13.076777
Ampedus	PSFOR549-13	Ampedus quercicola	PSFOR959-14	Ampedus nigrinus	13.256205
Ampedus	PSFOR549-13	Ampedus quercicola	PSFOR837-13	Ampedus pomonae	10.051565
Ampedus	PSFOR549-13	Ampedus quercicola	PSFOR550-13	Ampedus pomorum	11.406918
Ampedus	PSFOR549-13	Ampedus quercicola	PSFOR529-13	Ampedus pomorum	11.51484
Ampedus	PSFOR549-13	Ampedus quercicola	PSFOR532-13	Ampedus pomorum	11.926988
Ampedus	PSFOR549-13	Ampedus quercicola	PSFOR530-13	Ampedus pomorum	11.406918
Ampedus	PSFOR549-13	Ampedus quercicola	PSFOR546-13	Ampedus pomorum	11.701408
Ampedus	PSFOR549-13	Ampedus quercicola	PSFOR547-13	Ampedus pomorum	11.51484
Ampedus	PSFOR549-13	Ampedus quercicola	PSFOR548-13	Ampedus pomorum	11.51484
Ampedus	PSFOR549-13	Ampedus quercicola	PSFOR544-13	Ampedus pomorum	11.620587
Ampedus	PSFOR549-13	Ampedus quercicola	PSFOR735-13	Ampedus praestus	12.897814
Ampedus	PSFOR549-13	Ampedus quercicola	PSFOR848-13	Ampedus praestus	13.08614
Ampedus	PSFOR1002-14	Ampedus quercicola	PSFOR721-13	Ampedus aurilegulus	10.783004
Ampedus	PSFOR1002-14	Ampedus quercicola	PSFOR852-13	Ampedus aurilegulus	10.853973
Ampedus	PSFOR1002-14	Ampedus quercicola	PSFOR722-13	Ampedus balteatus	11.88916
Ampedus	PSFOR1002-14	Ampedus quercicola	PSFOR957-14	Ampedus balteatus	12.081835
Ampedus	PSFOR1002-14	Ampedus quercicola	PSFOR838-13	Ampedus balteatus	11.79983
Ampedus	PSFOR1002-14	Ampedus quercicola	PSFOR1056-14	Ampedus balteatus	12.664366
Ampedus	PSFOR1002-14	Ampedus quercicola	PSFOR834-13	Ampedus brunnicornis	11.86934
Ampedus	PSFOR1002-14	Ampedus quercicola	PSFOR737-13	Ampedus brunnicornis	11.86934
Ampedus	PSFOR1002-14	Ampedus quercicola	PSFOR723-13	Ampedus cardinalis	13.565871
Ampedus	PSFOR1002-14	Ampedus quercicola	PSFOR847-13	Ampedus cardinalis	12.989391
Ampedus	PSFOR1002-14	Ampedus quercicola	PSFOR734-13	Ampedus cinnabarinus	8.423587
Ampedus	PSFOR1002-14	Ampedus quercicola	PSFOR827-13	Ampedus elongatulus	12.744418
Ampedus	PSFOR1002-14	Ampedus quercicola	PSFOR933-14	Ampedus elongatulus	12.62819
Ampedus	PSFOR1002-14	Ampedus quercicola	PSFOR543-13	Ampedus elongatulus	12.775511
Ampedus	PSFOR1002-14	Ampedus quercicola	PSFOR854-13	Ampedus erythrogonus	15.924136
Ampedus	PSFOR1002-14	Ampedus quercicola	PSFOR853-13	Ampedus erythrogonus	15.759249
Ampedus	PSFOR1002-14	Ampedus quercicola	PSFOR726-13	Ampedus erythrogonus	15.911278
Ampedus	PSFOR1002-14	Ampedus quercicola	PSFOR936-14	Ampedus melonii	12.427265
Ampedus	PSFOR1002-14	Ampedus quercicola	PSFOR932-14	Ampedus nemoralis	11.934544
Ampedus	PSFOR1002-14	Ampedus quercicola	PSFOR528-13	Ampedus nemoralis	12.171051
Ampedus	PSFOR1002-14	Ampedus quercicola	PSFOR542-13	Ampedus nemoralis	12.1287155
Ampedus	PSFOR1002-14	Ampedus quercicola	PSFOR828-13	Ampedus nigerrimus	10.586524
Ampedus	PSFOR1002-14	Ampedus quercicola	PSFOR855-13	Ampedus nigerrimus	10.785064
Ampedus	PSFOR1002-14	Ampedus quercicola	PSFOR338-13	Ampedus nigerrimus	10.59603
Ampedus	PSFOR1002-14	Ampedus quercicola	PSFOR851-13	Ampedus nigerrimus	10.59603
Ampedus	PSFOR1002-14	Ampedus quercicola	PSFOR738-13	Ampedus nigrinus	14.147486
Ampedus	PSFOR1002-14	Ampedus quercicola	PSFOR959-14	Ampedus nigrinus	13.93909
Ampedus	PSFOR1002-14	Ampedus quercicola	PSFOR837-13	Ampedus pomonae	10.252506
Ampedus	PSFOR1002-14	Ampedus quercicola	PSFOR550-13	Ampedus pomorum	12.4241705
Ampedus	PSFOR1002-14	Ampedus quercicola	PSFOR529-13	Ampedus pomorum	12.1287155
Ampedus	PSFOR1002-14	Ampedus quercicola	PSFOR532-13	Ampedus pomorum	11.97356
Ampedus	PSFOR1002-14	Ampedus quercicola	PSFOR530-13	Ampedus pomorum	12.4241705
Ampedus	PSFOR1002-14	Ampedus quercicola	PSFOR546-13	Ampedus pomorum	12.3236475
Ampedus	PSFOR1002-14	Ampedus quercicola	PSFOR547-13	Ampedus pomorum	12.1287155
Ampedus	PSFOR1002-14	Ampedus quercicola	PSFOR548-13	Ampedus pomorum	12.1287155
Ampedus	PSFOR1002-14	Ampedus quercicola	PSFOR544-13	Ampedus pomorum	12.192333
Ampedus	PSFOR1002-14	Ampedus quercicola	PSFOR735-13	Ampedus praestus	12.427265
Ampedus	PSFOR1002-14	Ampedus quercicola	PSFOR848-13	Ampedus praestus	12.62069
Ampedus	PSFOR539-13	Ampedus quercicola	PSFOR721-13	Ampedus aurilegulus	8.979049
Ampedus	PSFOR539-13	Ampedus quercicola	PSFOR852-13	Ampedus aurilegulus	9.577861
Ampedus	PSFOR539-13	Ampedus quercicola	PSFOR722-13	Ampedus balteatus	11.455414
Ampedus	PSFOR539-13	Ampedus quercicola	PSFOR957-14	Ampedus balteatus	11.467359
Ampedus	PSFOR539-13	Ampedus quercicola	PSFOR838-13	Ampedus balteatus	11.530481
Ampedus	PSFOR539-13	Ampedus quercicola	PSFOR1056-14	Ampedus balteatus	12.35382
Ampedus	PSFOR539-13	Ampedus quercicola	PSFOR834-13	Ampedus brunnicornis	10.856606
Ampedus	PSFOR539-13	Ampedus quercicola	PSFOR737-13	Ampedus brunnicornis	10.856606
Ampedus	PSFOR539-13	Ampedus quercicola	PSFOR723-13	Ampedus cardinalis	14.188436
Ampedus	PSFOR539-13	Ampedus quercicola	PSFOR847-13	Ampedus cardinalis	13.873967
Ampedus	PSFOR539-13	Ampedus quercicola	PSFOR734-13	Ampedus cinnabarinus	7.4601607
Ampedus	PSFOR539-13	Ampedus quercicola	PSFOR827-13	Ampedus elongatulus	10.422354
Ampedus	PSFOR539-13	Ampedus quercicola	PSFOR933-14	Ampedus elongatulus	10.480021
Ampedus	PSFOR539-13	Ampedus quercicola	PSFOR543-13	Ampedus elongatulus	10.402186
Ampedus	PSFOR539-13	Ampedus quercicola	PSFOR854-13	Ampedus erythrogonus	14.774998
Ampedus	PSFOR539-13	Ampedus quercicola	PSFOR853-13	Ampedus erythrogonus	14.774998
Ampedus	PSFOR539-13	Ampedus quercicola	PSFOR726-13	Ampedus erythrogonus	14.761522
Ampedus	PSFOR539-13	Ampedus quercicola	PSFOR936-14	Ampedus melonii	12.660573
Ampedus	PSFOR539-13	Ampedus quercicola	PSFOR932-14	Ampedus nemoralis	10.6674385
Ampedus	PSFOR539-13	Ampedus quercicola	PSFOR528-13	Ampedus nemoralis	10.6674385
Ampedus	PSFOR539-13	Ampedus quercicola	PSFOR542-13	Ampedus nemoralis	10.6674385
Ampedus	PSFOR539-13	Ampedus quercicola	PSFOR828-13	Ampedus nigerrimus	9.420638
Ampedus	PSFOR539-13	Ampedus quercicola	PSFOR855-13	Ampedus nigerrimus	9.713895
Ampedus	PSFOR539-13	Ampedus quercicola	PSFOR338-13	Ampedus nigerrimus	9.420638
Ampedus	PSFOR539-13	Ampedus quercicola	PSFOR851-13	Ampedus nigerrimus	9.420638
Ampedus	PSFOR539-13	Ampedus quercicola	PSFOR738-13	Ampedus nigrinus	14.158874
Ampedus	PSFOR539-13	Ampedus quercicola	PSFOR959-14	Ampedus nigrinus	14.146058
Ampedus	PSFOR539-13	Ampedus quercicola	PSFOR837-13	Ampedus pomonae	10.393755
Ampedus	PSFOR539-13	Ampedus quercicola	PSFOR550-13	Ampedus pomorum	10.6674385
Ampedus	PSFOR539-13	Ampedus quercicola	PSFOR529-13	Ampedus pomorum	10.6674385
Ampedus	PSFOR539-13	Ampedus quercicola	PSFOR532-13	Ampedus pomorum	10.402186
Ampedus	PSFOR539-13	Ampedus quercicola	PSFOR530-13	Ampedus pomorum	10.6674385
Ampedus	PSFOR539-13	Ampedus quercicola	PSFOR546-13	Ampedus pomorum	10.971392
Ampedus	PSFOR539-13	Ampedus quercicola	PSFOR547-13	Ampedus pomorum	10.6674385
Ampedus	PSFOR539-13	Ampedus quercicola	PSFOR548-13	Ampedus pomorum	10.6674385
Ampedus	PSFOR539-13	Ampedus quercicola	PSFOR544-13	Ampedus pomorum	11.093734
Ampedus	PSFOR539-13	Ampedus quercicola	PSFOR735-13	Ampedus praestus	12.660573
Ampedus	PSFOR539-13	Ampedus quercicola	PSFOR848-13	Ampedus praestus	12.969215
Ampedus	PSFOR1004-14	Ampedus quercicola	PSFOR721-13	Ampedus aurilegulus	11.343161
Ampedus	PSFOR1004-14	Ampedus quercicola	PSFOR852-13	Ampedus aurilegulus	11.389758
Ampedus	PSFOR1004-14	Ampedus quercicola	PSFOR722-13	Ampedus balteatus	12.394437
Ampedus	PSFOR1004-14	Ampedus quercicola	PSFOR957-14	Ampedus balteatus	12.405597
Ampedus	PSFOR1004-14	Ampedus quercicola	PSFOR838-13	Ampedus balteatus	12.311676
Ampedus	PSFOR1004-14	Ampedus quercicola	PSFOR1056-14	Ampedus balteatus	13.152027
Ampedus	PSFOR1004-14	Ampedus quercicola	PSFOR834-13	Ampedus brunnicornis	12.186576
Ampedus	PSFOR1004-14	Ampedus quercicola	PSFOR737-13	Ampedus brunnicornis	12.186576
Ampedus	PSFOR1004-14	Ampedus quercicola	PSFOR723-13	Ampedus cardinalis	13.835806
Ampedus	PSFOR1004-14	Ampedus quercicola	PSFOR847-13	Ampedus cardinalis	13.275173
Ampedus	PSFOR1004-14	Ampedus quercicola	PSFOR734-13	Ampedus cinnabarinus	8.479847
Ampedus	PSFOR1004-14	Ampedus quercicola	PSFOR827-13	Ampedus elongatulus	12.672801
Ampedus	PSFOR1004-14	Ampedus quercicola	PSFOR933-14	Ampedus elongatulus	12.560165
Ampedus	PSFOR1004-14	Ampedus quercicola	PSFOR543-13	Ampedus elongatulus	12.34701
Ampedus	PSFOR1004-14	Ampedus quercicola	PSFOR854-13	Ampedus erythrogonus	16.127842
Ampedus	PSFOR1004-14	Ampedus quercicola	PSFOR853-13	Ampedus erythrogonus	15.985249
Ampedus	PSFOR1004-14	Ampedus quercicola	PSFOR726-13	Ampedus erythrogonus	16.11489
Ampedus	PSFOR1004-14	Ampedus quercicola	PSFOR936-14	Ampedus melonii	12.728897
Ampedus	PSFOR1004-14	Ampedus quercicola	PSFOR932-14	Ampedus nemoralis	11.888676
Ampedus	PSFOR1004-14	Ampedus quercicola	PSFOR528-13	Ampedus nemoralis	12.117443
Ampedus	PSFOR1004-14	Ampedus quercicola	PSFOR542-13	Ampedus nemoralis	12.076644
Ampedus	PSFOR1004-14	Ampedus quercicola	PSFOR828-13	Ampedus nigerrimus	10.939387
Ampedus	PSFOR1004-14	Ampedus quercicola	PSFOR855-13	Ampedus nigerrimus	11.133278
Ampedus	PSFOR1004-14	Ampedus quercicola	PSFOR338-13	Ampedus nigerrimus	10.949117
Ampedus	PSFOR1004-14	Ampedus quercicola	PSFOR851-13	Ampedus nigerrimus	10.949117
Ampedus	PSFOR1004-14	Ampedus quercicola	PSFOR738-13	Ampedus nigrinus	14.027378
Ampedus	PSFOR1004-14	Ampedus quercicola	PSFOR959-14	Ampedus nigrinus	13.82547
Ampedus	PSFOR1004-14	Ampedus quercicola	PSFOR837-13	Ampedus pomonae	10.647994
Ampedus	PSFOR1004-14	Ampedus quercicola	PSFOR550-13	Ampedus pomorum	12.324372
Ampedus	PSFOR1004-14	Ampedus quercicola	PSFOR529-13	Ampedus pomorum	12.076644
Ampedus	PSFOR1004-14	Ampedus quercicola	PSFOR532-13	Ampedus pomorum	12.116027
Ampedus	PSFOR1004-14	Ampedus quercicola	PSFOR530-13	Ampedus pomorum	12.324372
Ampedus	PSFOR1004-14	Ampedus quercicola	PSFOR546-13	Ampedus pomorum	12.265325
Ampedus	PSFOR1004-14	Ampedus quercicola	PSFOR547-13	Ampedus pomorum	12.076644
Ampedus	PSFOR1004-14	Ampedus quercicola	PSFOR548-13	Ampedus pomorum	12.076644
Ampedus	PSFOR1004-14	Ampedus quercicola	PSFOR544-13	Ampedus pomorum	12.192333
Ampedus	PSFOR1004-14	Ampedus quercicola	PSFOR735-13	Ampedus praestus	12.728897
Ampedus	PSFOR1004-14	Ampedus quercicola	PSFOR848-13	Ampedus praestus	12.917219
Ampedus	PSFOR540-13	Ampedus quercicola	PSFOR721-13	Ampedus aurilegulus	11.538477
Ampedus	PSFOR540-13	Ampedus quercicola	PSFOR852-13	Ampedus aurilegulus	11.577376
Ampedus	PSFOR540-13	Ampedus quercicola	PSFOR722-13	Ampedus balteatus	12.582763
Ampedus	PSFOR540-13	Ampedus quercicola	PSFOR957-14	Ampedus balteatus	12.594275
Ampedus	PSFOR540-13	Ampedus quercicola	PSFOR838-13	Ampedus balteatus	12.5014305
Ampedus	PSFOR540-13	Ampedus quercicola	PSFOR1056-14	Ampedus balteatus	13.343234
Ampedus	PSFOR540-13	Ampedus quercicola	PSFOR834-13	Ampedus brunnicornis	12.373493
Ampedus	PSFOR540-13	Ampedus quercicola	PSFOR737-13	Ampedus brunnicornis	12.373493
Ampedus	PSFOR540-13	Ampedus quercicola	PSFOR723-13	Ampedus cardinalis	14.027378
Ampedus	PSFOR540-13	Ampedus quercicola	PSFOR847-13	Ampedus cardinalis	13.464926
Ampedus	PSFOR540-13	Ampedus quercicola	PSFOR734-13	Ampedus cinnabarinus	8.656837
Ampedus	PSFOR540-13	Ampedus quercicola	PSFOR827-13	Ampedus elongatulus	12.481964
Ampedus	PSFOR540-13	Ampedus quercicola	PSFOR933-14	Ampedus elongatulus	12.368592
Ampedus	PSFOR540-13	Ampedus quercicola	PSFOR543-13	Ampedus elongatulus	12.038365
Ampedus	PSFOR540-13	Ampedus quercicola	PSFOR854-13	Ampedus erythrogonus	16.327045
Ampedus	PSFOR540-13	Ampedus quercicola	PSFOR853-13	Ampedus erythrogonus	16.20077
Ampedus	PSFOR540-13	Ampedus quercicola	PSFOR726-13	Ampedus erythrogonus	16.3137
Ampedus	PSFOR540-13	Ampedus quercicola	PSFOR936-14	Ampedus melonii	12.917219
Ampedus	PSFOR540-13	Ampedus quercicola	PSFOR932-14	Ampedus nemoralis	11.701408
Ampedus	PSFOR540-13	Ampedus quercicola	PSFOR528-13	Ampedus nemoralis	11.928766
Ampedus	PSFOR540-13	Ampedus quercicola	PSFOR542-13	Ampedus nemoralis	11.888676
Ampedus	PSFOR540-13	Ampedus quercicola	PSFOR828-13	Ampedus nigerrimus	10.756238
Ampedus	PSFOR540-13	Ampedus quercicola	PSFOR855-13	Ampedus nigerrimus	10.949117
Ampedus	PSFOR540-13	Ampedus quercicola	PSFOR338-13	Ampedus nigerrimus	10.765625
Ampedus	PSFOR540-13	Ampedus quercicola	PSFOR851-13	Ampedus nigerrimus	10.765625
Ampedus	PSFOR540-13	Ampedus quercicola	PSFOR738-13	Ampedus nigrinus	13.835806
Ampedus	PSFOR540-13	Ampedus quercicola	PSFOR959-14	Ampedus nigrinus	13.634994
Ampedus	PSFOR540-13	Ampedus quercicola	PSFOR837-13	Ampedus pomonae	10.448396
Ampedus	PSFOR540-13	Ampedus quercicola	PSFOR550-13	Ampedus pomorum	12.016683
Ampedus	PSFOR540-13	Ampedus quercicola	PSFOR529-13	Ampedus pomorum	11.888676
Ampedus	PSFOR540-13	Ampedus quercicola	PSFOR532-13	Ampedus pomorum	12.305779
Ampedus	PSFOR540-13	Ampedus quercicola	PSFOR530-13	Ampedus pomorum	12.016683
Ampedus	PSFOR540-13	Ampedus quercicola	PSFOR546-13	Ampedus pomorum	12.076644
Ampedus	PSFOR540-13	Ampedus quercicola	PSFOR547-13	Ampedus pomorum	11.888676
Ampedus	PSFOR540-13	Ampedus quercicola	PSFOR548-13	Ampedus pomorum	11.888676
Ampedus	PSFOR540-13	Ampedus quercicola	PSFOR544-13	Ampedus pomorum	11.997021
Ampedus	PSFOR540-13	Ampedus quercicola	PSFOR735-13	Ampedus praestus	12.917219
Ampedus	PSFOR540-13	Ampedus quercicola	PSFOR848-13	Ampedus praestus	13.106254
Ampedus	PSFOR843-13	Ampedus quercicola	PSFOR721-13	Ampedus aurilegulus	10.816433
Ampedus	PSFOR843-13	Ampedus quercicola	PSFOR852-13	Ampedus aurilegulus	10.891006
Ampedus	PSFOR843-13	Ampedus quercicola	PSFOR722-13	Ampedus balteatus	12.012309
Ampedus	PSFOR843-13	Ampedus quercicola	PSFOR957-14	Ampedus balteatus	12.219347
Ampedus	PSFOR843-13	Ampedus quercicola	PSFOR838-13	Ampedus balteatus	12.091482
Ampedus	PSFOR843-13	Ampedus quercicola	PSFOR1056-14	Ampedus balteatus	12.636016
Ampedus	PSFOR843-13	Ampedus quercicola	PSFOR834-13	Ampedus brunnicornis	12.196471
Ampedus	PSFOR843-13	Ampedus quercicola	PSFOR737-13	Ampedus brunnicornis	12.196471
Ampedus	PSFOR843-13	Ampedus quercicola	PSFOR723-13	Ampedus cardinalis	13.391328
Ampedus	PSFOR843-13	Ampedus quercicola	PSFOR847-13	Ampedus cardinalis	12.983858
Ampedus	PSFOR843-13	Ampedus quercicola	PSFOR734-13	Ampedus cinnabarinus	8.095864
Ampedus	PSFOR843-13	Ampedus quercicola	PSFOR827-13	Ampedus elongatulus	12.076966
Ampedus	PSFOR843-13	Ampedus quercicola	PSFOR933-14	Ampedus elongatulus	11.949582
Ampedus	PSFOR843-13	Ampedus quercicola	PSFOR543-13	Ampedus elongatulus	11.981676
Ampedus	PSFOR843-13	Ampedus quercicola	PSFOR854-13	Ampedus erythrogonus	15.26031
Ampedus	PSFOR843-13	Ampedus quercicola	PSFOR853-13	Ampedus erythrogonus	15.022962
Ampedus	PSFOR843-13	Ampedus quercicola	PSFOR726-13	Ampedus erythrogonus	15.248225
Ampedus	PSFOR843-13	Ampedus quercicola	PSFOR936-14	Ampedus melonii	12.175818
Ampedus	PSFOR843-13	Ampedus quercicola	PSFOR932-14	Ampedus nemoralis	11.441819
Ampedus	PSFOR843-13	Ampedus quercicola	PSFOR528-13	Ampedus nemoralis	11.691388
Ampedus	PSFOR843-13	Ampedus quercicola	PSFOR542-13	Ampedus nemoralis	11.648005
Ampedus	PSFOR843-13	Ampedus quercicola	PSFOR828-13	Ampedus nigerrimus	9.614911
Ampedus	PSFOR843-13	Ampedus quercicola	PSFOR855-13	Ampedus nigerrimus	9.425421
Ampedus	PSFOR843-13	Ampedus quercicola	PSFOR338-13	Ampedus nigerrimus	9.425421
Ampedus	PSFOR843-13	Ampedus quercicola	PSFOR851-13	Ampedus nigerrimus	9.425421
Ampedus	PSFOR843-13	Ampedus quercicola	PSFOR738-13	Ampedus nigrinus	13.182121
Ampedus	PSFOR843-13	Ampedus quercicola	PSFOR959-14	Ampedus nigrinus	13.172184
Ampedus	PSFOR843-13	Ampedus quercicola	PSFOR837-13	Ampedus pomonae	8.933076
Ampedus	PSFOR843-13	Ampedus quercicola	PSFOR550-13	Ampedus pomorum	11.619353
Ampedus	PSFOR843-13	Ampedus quercicola	PSFOR529-13	Ampedus pomorum	11.648005
Ampedus	PSFOR843-13	Ampedus quercicola	PSFOR532-13	Ampedus pomorum	11.897432
Ampedus	PSFOR843-13	Ampedus quercicola	PSFOR530-13	Ampedus pomorum	11.619353
Ampedus	PSFOR843-13	Ampedus quercicola	PSFOR546-13	Ampedus pomorum	11.855048
Ampedus	PSFOR843-13	Ampedus quercicola	PSFOR547-13	Ampedus pomorum	11.648005
Ampedus	PSFOR843-13	Ampedus quercicola	PSFOR548-13	Ampedus pomorum	11.648005
Ampedus	PSFOR843-13	Ampedus quercicola	PSFOR544-13	Ampedus pomorum	11.855048
Ampedus	PSFOR843-13	Ampedus quercicola	PSFOR735-13	Ampedus praestus	12.175818
Ampedus	PSFOR843-13	Ampedus quercicola	PSFOR848-13	Ampedus praestus	12.382005
Ampedus	PSFOR541-13	Ampedus quercicola	PSFOR721-13	Ampedus aurilegulus	11.538477
Ampedus	PSFOR541-13	Ampedus quercicola	PSFOR852-13	Ampedus aurilegulus	11.577376
Ampedus	PSFOR541-13	Ampedus quercicola	PSFOR722-13	Ampedus balteatus	12.582763
Ampedus	PSFOR541-13	Ampedus quercicola	PSFOR957-14	Ampedus balteatus	12.594275
Ampedus	PSFOR541-13	Ampedus quercicola	PSFOR838-13	Ampedus balteatus	12.5014305
Ampedus	PSFOR541-13	Ampedus quercicola	PSFOR1056-14	Ampedus balteatus	13.343234
Ampedus	PSFOR541-13	Ampedus quercicola	PSFOR834-13	Ampedus brunnicornis	12.373493
Ampedus	PSFOR541-13	Ampedus quercicola	PSFOR737-13	Ampedus brunnicornis	12.373493
Ampedus	PSFOR541-13	Ampedus quercicola	PSFOR723-13	Ampedus cardinalis	14.027378
Ampedus	PSFOR541-13	Ampedus quercicola	PSFOR847-13	Ampedus cardinalis	13.464926
Ampedus	PSFOR541-13	Ampedus quercicola	PSFOR734-13	Ampedus cinnabarinus	8.656837
Ampedus	PSFOR541-13	Ampedus quercicola	PSFOR827-13	Ampedus elongatulus	12.481964
Ampedus	PSFOR541-13	Ampedus quercicola	PSFOR933-14	Ampedus elongatulus	12.368592
Ampedus	PSFOR541-13	Ampedus quercicola	PSFOR543-13	Ampedus elongatulus	12.038365
Ampedus	PSFOR541-13	Ampedus quercicola	PSFOR854-13	Ampedus erythrogonus	16.327045
Ampedus	PSFOR541-13	Ampedus quercicola	PSFOR853-13	Ampedus erythrogonus	16.20077
Ampedus	PSFOR541-13	Ampedus quercicola	PSFOR726-13	Ampedus erythrogonus	16.3137
Ampedus	PSFOR541-13	Ampedus quercicola	PSFOR936-14	Ampedus melonii	12.917219
Ampedus	PSFOR541-13	Ampedus quercicola	PSFOR932-14	Ampedus nemoralis	11.701408
Ampedus	PSFOR541-13	Ampedus quercicola	PSFOR528-13	Ampedus nemoralis	11.928766
Ampedus	PSFOR541-13	Ampedus quercicola	PSFOR542-13	Ampedus nemoralis	11.888676
Ampedus	PSFOR541-13	Ampedus quercicola	PSFOR828-13	Ampedus nigerrimus	10.756238
Ampedus	PSFOR541-13	Ampedus quercicola	PSFOR855-13	Ampedus nigerrimus	10.949117
Ampedus	PSFOR541-13	Ampedus quercicola	PSFOR338-13	Ampedus nigerrimus	10.765625
Ampedus	PSFOR541-13	Ampedus quercicola	PSFOR851-13	Ampedus nigerrimus	10.765625
Ampedus	PSFOR541-13	Ampedus quercicola	PSFOR738-13	Ampedus nigrinus	13.835806
Ampedus	PSFOR541-13	Ampedus quercicola	PSFOR959-14	Ampedus nigrinus	13.634994
Ampedus	PSFOR541-13	Ampedus quercicola	PSFOR837-13	Ampedus pomonae	10.448396
Ampedus	PSFOR541-13	Ampedus quercicola	PSFOR550-13	Ampedus pomorum	12.016683
Ampedus	PSFOR541-13	Ampedus quercicola	PSFOR529-13	Ampedus pomorum	11.888676
Ampedus	PSFOR541-13	Ampedus quercicola	PSFOR532-13	Ampedus pomorum	12.305779
Ampedus	PSFOR541-13	Ampedus quercicola	PSFOR530-13	Ampedus pomorum	12.016683
Ampedus	PSFOR541-13	Ampedus quercicola	PSFOR546-13	Ampedus pomorum	12.076644
Ampedus	PSFOR541-13	Ampedus quercicola	PSFOR547-13	Ampedus pomorum	11.888676
Ampedus	PSFOR541-13	Ampedus quercicola	PSFOR548-13	Ampedus pomorum	11.888676
Ampedus	PSFOR541-13	Ampedus quercicola	PSFOR544-13	Ampedus pomorum	11.997021
Ampedus	PSFOR541-13	Ampedus quercicola	PSFOR735-13	Ampedus praestus	12.917219
Ampedus	PSFOR541-13	Ampedus quercicola	PSFOR848-13	Ampedus praestus	13.106254
Ampedus	PSFOR538-13	Ampedus quercicola	PSFOR721-13	Ampedus aurilegulus	10.845857
Ampedus	PSFOR538-13	Ampedus quercicola	PSFOR852-13	Ampedus aurilegulus	10.913612
Ampedus	PSFOR538-13	Ampedus quercicola	PSFOR722-13	Ampedus balteatus	11.937136
Ampedus	PSFOR538-13	Ampedus quercicola	PSFOR957-14	Ampedus balteatus	11.947864
Ampedus	PSFOR538-13	Ampedus quercicola	PSFOR838-13	Ampedus balteatus	12.009569
Ampedus	PSFOR538-13	Ampedus quercicola	PSFOR1056-14	Ampedus balteatus	12.693177
Ampedus	PSFOR538-13	Ampedus quercicola	PSFOR834-13	Ampedus brunnicornis	11.917092
Ampedus	PSFOR538-13	Ampedus quercicola	PSFOR737-13	Ampedus brunnicornis	11.917092
Ampedus	PSFOR538-13	Ampedus quercicola	PSFOR723-13	Ampedus cardinalis	13.596262
Ampedus	PSFOR538-13	Ampedus quercicola	PSFOR847-13	Ampedus cardinalis	13.025572
Ampedus	PSFOR538-13	Ampedus quercicola	PSFOR734-13	Ampedus cinnabarinus	8.317326
Ampedus	PSFOR538-13	Ampedus quercicola	PSFOR827-13	Ampedus elongatulus	12.215416
Ampedus	PSFOR538-13	Ampedus quercicola	PSFOR933-14	Ampedus elongatulus	12.098634
Ampedus	PSFOR538-13	Ampedus quercicola	PSFOR543-13	Ampedus elongatulus	11.586214
Ampedus	PSFOR538-13	Ampedus quercicola	PSFOR854-13	Ampedus erythrogonus	16.119804
Ampedus	PSFOR538-13	Ampedus quercicola	PSFOR853-13	Ampedus erythrogonus	15.973343
Ampedus	PSFOR538-13	Ampedus quercicola	PSFOR726-13	Ampedus erythrogonus	16.10698
Ampedus	PSFOR538-13	Ampedus quercicola	PSFOR936-14	Ampedus melonii	12.469281
Ampedus	PSFOR538-13	Ampedus quercicola	PSFOR932-14	Ampedus nemoralis	11.232055
Ampedus	PSFOR538-13	Ampedus quercicola	PSFOR528-13	Ampedus nemoralis	11.46102
Ampedus	PSFOR538-13	Ampedus quercicola	PSFOR542-13	Ampedus nemoralis	11.421813
Ampedus	PSFOR538-13	Ampedus quercicola	PSFOR828-13	Ampedus nigerrimus	10.2756405
Ampedus	PSFOR538-13	Ampedus quercicola	PSFOR855-13	Ampedus nigerrimus	10.470437
Ampedus	PSFOR538-13	Ampedus quercicola	PSFOR338-13	Ampedus nigerrimus	10.284565
Ampedus	PSFOR538-13	Ampedus quercicola	PSFOR851-13	Ampedus nigerrimus	10.284565
Ampedus	PSFOR538-13	Ampedus quercicola	PSFOR738-13	Ampedus nigrinus	13.402088
Ampedus	PSFOR538-13	Ampedus quercicola	PSFOR959-14	Ampedus nigrinus	13.199184
Ampedus	PSFOR538-13	Ampedus quercicola	PSFOR837-13	Ampedus pomonae	9.91766
Ampedus	PSFOR538-13	Ampedus quercicola	PSFOR550-13	Ampedus pomorum	11.250011
Ampedus	PSFOR538-13	Ampedus quercicola	PSFOR529-13	Ampedus pomorum	11.421813
Ampedus	PSFOR538-13	Ampedus quercicola	PSFOR532-13	Ampedus pomorum	11.650612
Ampedus	PSFOR538-13	Ampedus quercicola	PSFOR530-13	Ampedus pomorum	11.250011
Ampedus	PSFOR538-13	Ampedus quercicola	PSFOR546-13	Ampedus pomorum	11.612286
Ampedus	PSFOR538-13	Ampedus quercicola	PSFOR547-13	Ampedus pomorum	11.421813
Ampedus	PSFOR538-13	Ampedus quercicola	PSFOR548-13	Ampedus pomorum	11.421813
Ampedus	PSFOR538-13	Ampedus quercicola	PSFOR544-13	Ampedus pomorum	11.661174
Ampedus	PSFOR538-13	Ampedus quercicola	PSFOR735-13	Ampedus praestus	12.469281
Ampedus	PSFOR538-13	Ampedus quercicola	PSFOR848-13	Ampedus praestus	12.660853
Ampedus	PSFOR1006-14	Ampedus quercicola	PSFOR721-13	Ampedus aurilegulus	11.734553
Ampedus	PSFOR1006-14	Ampedus quercicola	PSFOR852-13	Ampedus aurilegulus	11.765703
Ampedus	PSFOR1006-14	Ampedus quercicola	PSFOR722-13	Ampedus balteatus	12.771802
Ampedus	PSFOR1006-14	Ampedus quercicola	PSFOR957-14	Ampedus balteatus	12.7836685
Ampedus	PSFOR1006-14	Ampedus quercicola	PSFOR838-13	Ampedus balteatus	12.691905
Ampedus	PSFOR1006-14	Ampedus quercicola	PSFOR1056-14	Ampedus balteatus	13.535174
Ampedus	PSFOR1006-14	Ampedus quercicola	PSFOR834-13	Ampedus brunnicornis	12.561111
Ampedus	PSFOR1006-14	Ampedus quercicola	PSFOR737-13	Ampedus brunnicornis	12.561111
Ampedus	PSFOR1006-14	Ampedus quercicola	PSFOR723-13	Ampedus cardinalis	14.2196865
Ampedus	PSFOR1006-14	Ampedus quercicola	PSFOR847-13	Ampedus cardinalis	13.655405
Ampedus	PSFOR1006-14	Ampedus quercicola	PSFOR734-13	Ampedus cinnabarinus	8.834458
Ampedus	PSFOR1006-14	Ampedus quercicola	PSFOR827-13	Ampedus elongatulus	12.291848
Ampedus	PSFOR1006-14	Ampedus quercicola	PSFOR933-14	Ampedus elongatulus	12.177753
Ampedus	PSFOR1006-14	Ampedus quercicola	PSFOR543-13	Ampedus elongatulus	12.038365
Ampedus	PSFOR1006-14	Ampedus quercicola	PSFOR854-13	Ampedus erythrogonus	16.527046
Ampedus	PSFOR1006-14	Ampedus quercicola	PSFOR853-13	Ampedus erythrogonus	16.20077
Ampedus	PSFOR1006-14	Ampedus quercicola	PSFOR726-13	Ampedus erythrogonus	16.5133
Ampedus	PSFOR1006-14	Ampedus quercicola	PSFOR936-14	Ampedus melonii	13.106254
Ampedus	PSFOR1006-14	Ampedus quercicola	PSFOR932-14	Ampedus nemoralis	11.51484
Ampedus	PSFOR1006-14	Ampedus quercicola	PSFOR528-13	Ampedus nemoralis	11.740795
Ampedus	PSFOR1006-14	Ampedus quercicola	PSFOR542-13	Ampedus nemoralis	11.701408
Ampedus	PSFOR1006-14	Ampedus quercicola	PSFOR828-13	Ampedus nigerrimus	10.939387
Ampedus	PSFOR1006-14	Ampedus quercicola	PSFOR855-13	Ampedus nigerrimus	11.133278
Ampedus	PSFOR1006-14	Ampedus quercicola	PSFOR338-13	Ampedus nigerrimus	10.949117
Ampedus	PSFOR1006-14	Ampedus quercicola	PSFOR851-13	Ampedus nigerrimus	10.949117
Ampedus	PSFOR1006-14	Ampedus quercicola	PSFOR738-13	Ampedus nigrinus	14.027378
Ampedus	PSFOR1006-14	Ampedus quercicola	PSFOR959-14	Ampedus nigrinus	13.82547
Ampedus	PSFOR1006-14	Ampedus quercicola	PSFOR837-13	Ampedus pomonae	10.448396
Ampedus	PSFOR1006-14	Ampedus quercicola	PSFOR550-13	Ampedus pomorum	12.016683
Ampedus	PSFOR1006-14	Ampedus quercicola	PSFOR529-13	Ampedus pomorum	11.701408
Ampedus	PSFOR1006-14	Ampedus quercicola	PSFOR532-13	Ampedus pomorum	12.116027
Ampedus	PSFOR1006-14	Ampedus quercicola	PSFOR530-13	Ampedus pomorum	12.016683
Ampedus	PSFOR1006-14	Ampedus quercicola	PSFOR546-13	Ampedus pomorum	11.888676
Ampedus	PSFOR1006-14	Ampedus quercicola	PSFOR547-13	Ampedus pomorum	11.701408
Ampedus	PSFOR1006-14	Ampedus quercicola	PSFOR548-13	Ampedus pomorum	11.701408
Ampedus	PSFOR1006-14	Ampedus quercicola	PSFOR544-13	Ampedus pomorum	11.802467
Ampedus	PSFOR1006-14	Ampedus quercicola	PSFOR735-13	Ampedus praestus	13.106254
Ampedus	PSFOR1006-14	Ampedus quercicola	PSFOR848-13	Ampedus praestus	13.29601
Ampedus	PSFOR1005-14	Ampedus quercicola	PSFOR721-13	Ampedus aurilegulus	11.343161
Ampedus	PSFOR1005-14	Ampedus quercicola	PSFOR852-13	Ampedus aurilegulus	11.389758
Ampedus	PSFOR1005-14	Ampedus quercicola	PSFOR722-13	Ampedus balteatus	12.394437
Ampedus	PSFOR1005-14	Ampedus quercicola	PSFOR957-14	Ampedus balteatus	12.405597
Ampedus	PSFOR1005-14	Ampedus quercicola	PSFOR838-13	Ampedus balteatus	12.311676
Ampedus	PSFOR1005-14	Ampedus quercicola	PSFOR1056-14	Ampedus balteatus	13.152027
Ampedus	PSFOR1005-14	Ampedus quercicola	PSFOR834-13	Ampedus brunnicornis	12.186576
Ampedus	PSFOR1005-14	Ampedus quercicola	PSFOR737-13	Ampedus brunnicornis	12.186576
Ampedus	PSFOR1005-14	Ampedus quercicola	PSFOR723-13	Ampedus cardinalis	13.835806
Ampedus	PSFOR1005-14	Ampedus quercicola	PSFOR847-13	Ampedus cardinalis	13.275173
Ampedus	PSFOR1005-14	Ampedus quercicola	PSFOR734-13	Ampedus cinnabarinus	8.479847
Ampedus	PSFOR1005-14	Ampedus quercicola	PSFOR827-13	Ampedus elongatulus	12.672801
Ampedus	PSFOR1005-14	Ampedus quercicola	PSFOR933-14	Ampedus elongatulus	12.560165
Ampedus	PSFOR1005-14	Ampedus quercicola	PSFOR543-13	Ampedus elongatulus	12.34701
Ampedus	PSFOR1005-14	Ampedus quercicola	PSFOR854-13	Ampedus erythrogonus	16.127842
Ampedus	PSFOR1005-14	Ampedus quercicola	PSFOR853-13	Ampedus erythrogonus	15.985249
Ampedus	PSFOR1005-14	Ampedus quercicola	PSFOR726-13	Ampedus erythrogonus	16.11489
Ampedus	PSFOR1005-14	Ampedus quercicola	PSFOR936-14	Ampedus melonii	12.728897
Ampedus	PSFOR1005-14	Ampedus quercicola	PSFOR932-14	Ampedus nemoralis	11.888676
Ampedus	PSFOR1005-14	Ampedus quercicola	PSFOR528-13	Ampedus nemoralis	12.117443
Ampedus	PSFOR1005-14	Ampedus quercicola	PSFOR542-13	Ampedus nemoralis	12.076644
Ampedus	PSFOR1005-14	Ampedus quercicola	PSFOR828-13	Ampedus nigerrimus	10.939387
Ampedus	PSFOR1005-14	Ampedus quercicola	PSFOR855-13	Ampedus nigerrimus	11.133278
Ampedus	PSFOR1005-14	Ampedus quercicola	PSFOR338-13	Ampedus nigerrimus	10.949117
Ampedus	PSFOR1005-14	Ampedus quercicola	PSFOR851-13	Ampedus nigerrimus	10.949117
Ampedus	PSFOR1005-14	Ampedus quercicola	PSFOR738-13	Ampedus nigrinus	14.027378
Ampedus	PSFOR1005-14	Ampedus quercicola	PSFOR959-14	Ampedus nigrinus	13.82547
Ampedus	PSFOR1005-14	Ampedus quercicola	PSFOR837-13	Ampedus pomonae	10.647994
Ampedus	PSFOR1005-14	Ampedus quercicola	PSFOR550-13	Ampedus pomorum	12.324372
Ampedus	PSFOR1005-14	Ampedus quercicola	PSFOR529-13	Ampedus pomorum	12.076644
Ampedus	PSFOR1005-14	Ampedus quercicola	PSFOR532-13	Ampedus pomorum	12.116027
Ampedus	PSFOR1005-14	Ampedus quercicola	PSFOR530-13	Ampedus pomorum	12.324372
Ampedus	PSFOR1005-14	Ampedus quercicola	PSFOR546-13	Ampedus pomorum	12.265325
Ampedus	PSFOR1005-14	Ampedus quercicola	PSFOR547-13	Ampedus pomorum	12.076644
Ampedus	PSFOR1005-14	Ampedus quercicola	PSFOR548-13	Ampedus pomorum	12.076644
Ampedus	PSFOR1005-14	Ampedus quercicola	PSFOR544-13	Ampedus pomorum	12.192333
Ampedus	PSFOR1005-14	Ampedus quercicola	PSFOR735-13	Ampedus praestus	12.728897
Ampedus	PSFOR1005-14	Ampedus quercicola	PSFOR848-13	Ampedus praestus	12.917219
Ampedus	PSFOR841-13	Ampedus quercicola	PSFOR721-13	Ampedus aurilegulus	10.967722
Ampedus	PSFOR841-13	Ampedus quercicola	PSFOR852-13	Ampedus aurilegulus	11.141489
Ampedus	PSFOR841-13	Ampedus quercicola	PSFOR722-13	Ampedus balteatus	12.320395
Ampedus	PSFOR841-13	Ampedus quercicola	PSFOR957-14	Ampedus balteatus	12.33097
Ampedus	PSFOR841-13	Ampedus quercicola	PSFOR838-13	Ampedus balteatus	12.235507
Ampedus	PSFOR841-13	Ampedus quercicola	PSFOR1056-14	Ampedus balteatus	12.890747
Ampedus	PSFOR841-13	Ampedus quercicola	PSFOR834-13	Ampedus brunnicornis	11.934347
Ampedus	PSFOR841-13	Ampedus quercicola	PSFOR737-13	Ampedus brunnicornis	11.934347
Ampedus	PSFOR841-13	Ampedus quercicola	PSFOR723-13	Ampedus cardinalis	13.582718
Ampedus	PSFOR841-13	Ampedus quercicola	PSFOR847-13	Ampedus cardinalis	13.02001
Ampedus	PSFOR841-13	Ampedus quercicola	PSFOR734-13	Ampedus cinnabarinus	8.215611
Ampedus	PSFOR841-13	Ampedus quercicola	PSFOR827-13	Ampedus elongatulus	11.832614
Ampedus	PSFOR841-13	Ampedus quercicola	PSFOR933-14	Ampedus elongatulus	11.715496
Ampedus	PSFOR841-13	Ampedus quercicola	PSFOR543-13	Ampedus elongatulus	11.388257
Ampedus	PSFOR841-13	Ampedus quercicola	PSFOR854-13	Ampedus erythrogonus	15.300515
Ampedus	PSFOR841-13	Ampedus quercicola	PSFOR853-13	Ampedus erythrogonus	15.331806
Ampedus	PSFOR841-13	Ampedus quercicola	PSFOR726-13	Ampedus erythrogonus	15.289253
Ampedus	PSFOR841-13	Ampedus quercicola	PSFOR936-14	Ampedus melonii	12.470711
Ampedus	PSFOR841-13	Ampedus quercicola	PSFOR932-14	Ampedus nemoralis	11.080722
Ampedus	PSFOR841-13	Ampedus quercicola	PSFOR528-13	Ampedus nemoralis	11.305787
Ampedus	PSFOR841-13	Ampedus quercicola	PSFOR542-13	Ampedus nemoralis	11.267638
Ampedus	PSFOR841-13	Ampedus quercicola	PSFOR828-13	Ampedus nigerrimus	9.5942135
Ampedus	PSFOR841-13	Ampedus quercicola	PSFOR855-13	Ampedus nigerrimus	9.783064
Ampedus	PSFOR841-13	Ampedus quercicola	PSFOR338-13	Ampedus nigerrimus	9.601905
Ampedus	PSFOR841-13	Ampedus quercicola	PSFOR851-13	Ampedus nigerrimus	9.601905
Ampedus	PSFOR841-13	Ampedus quercicola	PSFOR738-13	Ampedus nigrinus	12.839463
Ampedus	PSFOR841-13	Ampedus quercicola	PSFOR959-14	Ampedus nigrinus	13.02001
Ampedus	PSFOR841-13	Ampedus quercicola	PSFOR837-13	Ampedus pomonae	9.865283
Ampedus	PSFOR841-13	Ampedus quercicola	PSFOR550-13	Ampedus pomorum	11.406918
Ampedus	PSFOR841-13	Ampedus quercicola	PSFOR529-13	Ampedus pomorum	11.267638
Ampedus	PSFOR841-13	Ampedus quercicola	PSFOR532-13	Ampedus pomorum	11.681901
Ampedus	PSFOR841-13	Ampedus quercicola	PSFOR530-13	Ampedus pomorum	11.406918
Ampedus	PSFOR841-13	Ampedus quercicola	PSFOR546-13	Ampedus pomorum	11.4552555
Ampedus	PSFOR841-13	Ampedus quercicola	PSFOR547-13	Ampedus pomorum	11.267638
Ampedus	PSFOR841-13	Ampedus quercicola	PSFOR548-13	Ampedus pomorum	11.267638
Ampedus	PSFOR841-13	Ampedus quercicola	PSFOR544-13	Ampedus pomorum	11.36449
Ampedus	PSFOR841-13	Ampedus quercicola	PSFOR735-13	Ampedus praestus	12.470711
Ampedus	PSFOR841-13	Ampedus quercicola	PSFOR848-13	Ampedus praestus	12.659388
Ampedus	PSFOR937-14	Ampedus quercicola	PSFOR721-13	Ampedus aurilegulus	10.973804
Ampedus	PSFOR937-14	Ampedus quercicola	PSFOR852-13	Ampedus aurilegulus	11.465207
Ampedus	PSFOR937-14	Ampedus quercicola	PSFOR722-13	Ampedus balteatus	12.046927
Ampedus	PSFOR937-14	Ampedus quercicola	PSFOR957-14	Ampedus balteatus	12.292027
Ampedus	PSFOR937-14	Ampedus quercicola	PSFOR838-13	Ampedus balteatus	12.113216
Ampedus	PSFOR937-14	Ampedus quercicola	PSFOR1056-14	Ampedus balteatus	12.538335
Ampedus	PSFOR937-14	Ampedus quercicola	PSFOR834-13	Ampedus brunnicornis	12.034714
Ampedus	PSFOR937-14	Ampedus quercicola	PSFOR737-13	Ampedus brunnicornis	12.034714
Ampedus	PSFOR937-14	Ampedus quercicola	PSFOR723-13	Ampedus cardinalis	13.464427
Ampedus	PSFOR937-14	Ampedus quercicola	PSFOR847-13	Ampedus cardinalis	12.980824
Ampedus	PSFOR937-14	Ampedus quercicola	PSFOR734-13	Ampedus cinnabarinus	7.882713
Ampedus	PSFOR937-14	Ampedus quercicola	PSFOR827-13	Ampedus elongatulus	11.676175
Ampedus	PSFOR937-14	Ampedus quercicola	PSFOR933-14	Ampedus elongatulus	11.754158
Ampedus	PSFOR937-14	Ampedus quercicola	PSFOR543-13	Ampedus elongatulus	12.468119
Ampedus	PSFOR937-14	Ampedus quercicola	PSFOR854-13	Ampedus erythrogonus	14.935154
Ampedus	PSFOR937-14	Ampedus quercicola	PSFOR853-13	Ampedus erythrogonus	14.935154
Ampedus	PSFOR937-14	Ampedus quercicola	PSFOR726-13	Ampedus erythrogonus	14.921986
Ampedus	PSFOR937-14	Ampedus quercicola	PSFOR936-14	Ampedus melonii	11.78057
Ampedus	PSFOR937-14	Ampedus quercicola	PSFOR932-14	Ampedus nemoralis	11.153642
Ampedus	PSFOR937-14	Ampedus quercicola	PSFOR528-13	Ampedus nemoralis	11.447892
Ampedus	PSFOR937-14	Ampedus quercicola	PSFOR542-13	Ampedus nemoralis	11.397543
Ampedus	PSFOR937-14	Ampedus quercicola	PSFOR828-13	Ampedus nigerrimus	9.225045
Ampedus	PSFOR937-14	Ampedus quercicola	PSFOR855-13	Ampedus nigerrimus	9.001105
Ampedus	PSFOR937-14	Ampedus quercicola	PSFOR338-13	Ampedus nigerrimus	9.001105
Ampedus	PSFOR937-14	Ampedus quercicola	PSFOR851-13	Ampedus nigerrimus	9.001105
Ampedus	PSFOR937-14	Ampedus quercicola	PSFOR738-13	Ampedus nigrinus	12.948902
Ampedus	PSFOR937-14	Ampedus quercicola	PSFOR959-14	Ampedus nigrinus	13.184979
Ampedus	PSFOR937-14	Ampedus quercicola	PSFOR837-13	Ampedus pomonae	9.03998
Ampedus	PSFOR937-14	Ampedus quercicola	PSFOR550-13	Ampedus pomorum	11.713387
Ampedus	PSFOR937-14	Ampedus quercicola	PSFOR529-13	Ampedus pomorum	11.397543
Ampedus	PSFOR937-14	Ampedus quercicola	PSFOR532-13	Ampedus pomorum	11.69408
Ampedus	PSFOR937-14	Ampedus quercicola	PSFOR530-13	Ampedus pomorum	11.713387
Ampedus	PSFOR937-14	Ampedus quercicola	PSFOR546-13	Ampedus pomorum	11.64264
Ampedus	PSFOR937-14	Ampedus quercicola	PSFOR547-13	Ampedus pomorum	11.397543
Ampedus	PSFOR937-14	Ampedus quercicola	PSFOR548-13	Ampedus pomorum	11.397543
Ampedus	PSFOR937-14	Ampedus quercicola	PSFOR544-13	Ampedus pomorum	11.64264
Ampedus	PSFOR937-14	Ampedus quercicola	PSFOR735-13	Ampedus praestus	11.78057
Ampedus	PSFOR937-14	Ampedus quercicola	PSFOR848-13	Ampedus praestus	12.023289
Ampedus	PSFOR840-13	Ampedus rufipennis	PSFOR721-13	Ampedus aurilegulus	8.723156
Ampedus	PSFOR840-13	Ampedus rufipennis	PSFOR852-13	Ampedus aurilegulus	9.2108755
Ampedus	PSFOR840-13	Ampedus rufipennis	PSFOR722-13	Ampedus balteatus	10.992381
Ampedus	PSFOR840-13	Ampedus rufipennis	PSFOR957-14	Ampedus balteatus	10.634595
Ampedus	PSFOR840-13	Ampedus rufipennis	PSFOR838-13	Ampedus balteatus	10.880128
Ampedus	PSFOR840-13	Ampedus rufipennis	PSFOR1056-14	Ampedus balteatus	11.526469
Ampedus	PSFOR840-13	Ampedus rufipennis	PSFOR834-13	Ampedus brunnicornis	10.992381
Ampedus	PSFOR840-13	Ampedus rufipennis	PSFOR737-13	Ampedus brunnicornis	10.992381
Ampedus	PSFOR840-13	Ampedus rufipennis	PSFOR723-13	Ampedus cardinalis	11.4929
Ampedus	PSFOR840-13	Ampedus rufipennis	PSFOR847-13	Ampedus cardinalis	11.668124
Ampedus	PSFOR840-13	Ampedus rufipennis	PSFOR734-13	Ampedus cinnabarinus	7.7923417
Ampedus	PSFOR840-13	Ampedus rufipennis	PSFOR827-13	Ampedus elongatulus	10.339851
Ampedus	PSFOR840-13	Ampedus rufipennis	PSFOR933-14	Ampedus elongatulus	10.034614
Ampedus	PSFOR840-13	Ampedus rufipennis	PSFOR543-13	Ampedus elongatulus	9.408765
Ampedus	PSFOR840-13	Ampedus rufipennis	PSFOR854-13	Ampedus erythrogonus	14.178276
Ampedus	PSFOR840-13	Ampedus rufipennis	PSFOR853-13	Ampedus erythrogonus	13.683406
Ampedus	PSFOR840-13	Ampedus rufipennis	PSFOR726-13	Ampedus erythrogonus	14.18791
Ampedus	PSFOR840-13	Ampedus rufipennis	PSFOR936-14	Ampedus melonii	10.949117
Ampedus	PSFOR840-13	Ampedus rufipennis	PSFOR932-14	Ampedus nemoralis	10.106858
Ampedus	PSFOR840-13	Ampedus rufipennis	PSFOR528-13	Ampedus nemoralis	10.140551
Ampedus	PSFOR840-13	Ampedus rufipennis	PSFOR542-13	Ampedus nemoralis	10.290005
Ampedus	PSFOR840-13	Ampedus rufipennis	PSFOR828-13	Ampedus nigerrimus	9.5416565
Ampedus	PSFOR840-13	Ampedus rufipennis	PSFOR855-13	Ampedus nigerrimus	9.893436
Ampedus	PSFOR840-13	Ampedus rufipennis	PSFOR338-13	Ampedus nigerrimus	9.712603
Ampedus	PSFOR840-13	Ampedus rufipennis	PSFOR851-13	Ampedus nigerrimus	9.712603
Ampedus	PSFOR840-13	Ampedus rufipennis	PSFOR738-13	Ampedus nigrinus	13.117008
Ampedus	PSFOR840-13	Ampedus rufipennis	PSFOR959-14	Ampedus nigrinus	13.677688
Ampedus	PSFOR840-13	Ampedus rufipennis	PSFOR837-13	Ampedus pomonae	8.929813
Ampedus	PSFOR840-13	Ampedus rufipennis	PSFOR550-13	Ampedus pomorum	10.541342
Ampedus	PSFOR840-13	Ampedus rufipennis	PSFOR529-13	Ampedus pomorum	10.290005
Ampedus	PSFOR840-13	Ampedus rufipennis	PSFOR532-13	Ampedus pomorum	9.776291
Ampedus	PSFOR840-13	Ampedus rufipennis	PSFOR530-13	Ampedus pomorum	10.541342
Ampedus	PSFOR840-13	Ampedus rufipennis	PSFOR546-13	Ampedus pomorum	10.658331
Ampedus	PSFOR840-13	Ampedus rufipennis	PSFOR547-13	Ampedus pomorum	10.290005
Ampedus	PSFOR840-13	Ampedus rufipennis	PSFOR548-13	Ampedus pomorum	10.290005
Ampedus	PSFOR840-13	Ampedus rufipennis	PSFOR544-13	Ampedus pomorum	10.539168
Ampedus	PSFOR840-13	Ampedus rufipennis	PSFOR735-13	Ampedus praestus	10.949117
Ampedus	PSFOR840-13	Ampedus rufipennis	PSFOR848-13	Ampedus praestus	10.765625
Ampedus	PSFOR840-13	Ampedus rufipennis	PSFOR842-13	Ampedus quercicola	10.84923
Ampedus	PSFOR840-13	Ampedus rufipennis	PSFOR549-13	Ampedus quercicola	10.2786045
Ampedus	PSFOR840-13	Ampedus rufipennis	PSFOR1002-14	Ampedus quercicola	10.6627655
Ampedus	PSFOR840-13	Ampedus rufipennis	PSFOR539-13	Ampedus quercicola	8.925235
Ampedus	PSFOR840-13	Ampedus rufipennis	PSFOR1004-14	Ampedus quercicola	11.016626
Ampedus	PSFOR840-13	Ampedus rufipennis	PSFOR540-13	Ampedus quercicola	10.831095
Ampedus	PSFOR840-13	Ampedus rufipennis	PSFOR843-13	Ampedus quercicola	10.088782
Ampedus	PSFOR840-13	Ampedus rufipennis	PSFOR541-13	Ampedus quercicola	10.831095
Ampedus	PSFOR840-13	Ampedus rufipennis	PSFOR538-13	Ampedus quercicola	10.347567
Ampedus	PSFOR840-13	Ampedus rufipennis	PSFOR1006-14	Ampedus quercicola	11.016626
Ampedus	PSFOR840-13	Ampedus rufipennis	PSFOR1005-14	Ampedus quercicola	11.016626
Ampedus	PSFOR840-13	Ampedus rufipennis	PSFOR841-13	Ampedus quercicola	10.208623
Ampedus	PSFOR840-13	Ampedus rufipennis	PSFOR937-14	Ampedus quercicola	9.542003
Ampedus	PSFOR962-14	Ampedus rufipennis	PSFOR721-13	Ampedus aurilegulus	8.723156
Ampedus	PSFOR962-14	Ampedus rufipennis	PSFOR852-13	Ampedus aurilegulus	9.2108755
Ampedus	PSFOR962-14	Ampedus rufipennis	PSFOR722-13	Ampedus balteatus	10.992381
Ampedus	PSFOR962-14	Ampedus rufipennis	PSFOR957-14	Ampedus balteatus	10.634595
Ampedus	PSFOR962-14	Ampedus rufipennis	PSFOR838-13	Ampedus balteatus	10.880128
Ampedus	PSFOR962-14	Ampedus rufipennis	PSFOR1056-14	Ampedus balteatus	11.526469
Ampedus	PSFOR962-14	Ampedus rufipennis	PSFOR834-13	Ampedus brunnicornis	10.992381
Ampedus	PSFOR962-14	Ampedus rufipennis	PSFOR737-13	Ampedus brunnicornis	10.992381
Ampedus	PSFOR962-14	Ampedus rufipennis	PSFOR723-13	Ampedus cardinalis	11.4929
Ampedus	PSFOR962-14	Ampedus rufipennis	PSFOR847-13	Ampedus cardinalis	11.668124
Ampedus	PSFOR962-14	Ampedus rufipennis	PSFOR734-13	Ampedus cinnabarinus	7.7923417
Ampedus	PSFOR962-14	Ampedus rufipennis	PSFOR827-13	Ampedus elongatulus	10.339851
Ampedus	PSFOR962-14	Ampedus rufipennis	PSFOR933-14	Ampedus elongatulus	10.034614
Ampedus	PSFOR962-14	Ampedus rufipennis	PSFOR543-13	Ampedus elongatulus	9.408765
Ampedus	PSFOR962-14	Ampedus rufipennis	PSFOR854-13	Ampedus erythrogonus	14.178276
Ampedus	PSFOR962-14	Ampedus rufipennis	PSFOR853-13	Ampedus erythrogonus	13.683406
Ampedus	PSFOR962-14	Ampedus rufipennis	PSFOR726-13	Ampedus erythrogonus	14.18791
Ampedus	PSFOR962-14	Ampedus rufipennis	PSFOR936-14	Ampedus melonii	10.949117
Ampedus	PSFOR962-14	Ampedus rufipennis	PSFOR932-14	Ampedus nemoralis	10.106858
Ampedus	PSFOR962-14	Ampedus rufipennis	PSFOR528-13	Ampedus nemoralis	10.140551
Ampedus	PSFOR962-14	Ampedus rufipennis	PSFOR542-13	Ampedus nemoralis	10.290005
Ampedus	PSFOR962-14	Ampedus rufipennis	PSFOR828-13	Ampedus nigerrimus	9.5416565
Ampedus	PSFOR962-14	Ampedus rufipennis	PSFOR855-13	Ampedus nigerrimus	9.893436
Ampedus	PSFOR962-14	Ampedus rufipennis	PSFOR338-13	Ampedus nigerrimus	9.712603
Ampedus	PSFOR962-14	Ampedus rufipennis	PSFOR851-13	Ampedus nigerrimus	9.712603
Ampedus	PSFOR962-14	Ampedus rufipennis	PSFOR738-13	Ampedus nigrinus	13.117008
Ampedus	PSFOR962-14	Ampedus rufipennis	PSFOR959-14	Ampedus nigrinus	13.677688
Ampedus	PSFOR962-14	Ampedus rufipennis	PSFOR837-13	Ampedus pomonae	8.929813
Ampedus	PSFOR962-14	Ampedus rufipennis	PSFOR550-13	Ampedus pomorum	10.541342
Ampedus	PSFOR962-14	Ampedus rufipennis	PSFOR529-13	Ampedus pomorum	10.290005
Ampedus	PSFOR962-14	Ampedus rufipennis	PSFOR532-13	Ampedus pomorum	9.776291
Ampedus	PSFOR962-14	Ampedus rufipennis	PSFOR530-13	Ampedus pomorum	10.541342
Ampedus	PSFOR962-14	Ampedus rufipennis	PSFOR546-13	Ampedus pomorum	10.658331
Ampedus	PSFOR962-14	Ampedus rufipennis	PSFOR547-13	Ampedus pomorum	10.290005
Ampedus	PSFOR962-14	Ampedus rufipennis	PSFOR548-13	Ampedus pomorum	10.290005
Ampedus	PSFOR962-14	Ampedus rufipennis	PSFOR544-13	Ampedus pomorum	10.539168
Ampedus	PSFOR962-14	Ampedus rufipennis	PSFOR735-13	Ampedus praestus	10.949117
Ampedus	PSFOR962-14	Ampedus rufipennis	PSFOR848-13	Ampedus praestus	10.765625
Ampedus	PSFOR962-14	Ampedus rufipennis	PSFOR842-13	Ampedus quercicola	10.84923
Ampedus	PSFOR962-14	Ampedus rufipennis	PSFOR549-13	Ampedus quercicola	10.2786045
Ampedus	PSFOR962-14	Ampedus rufipennis	PSFOR1002-14	Ampedus quercicola	10.6627655
Ampedus	PSFOR962-14	Ampedus rufipennis	PSFOR539-13	Ampedus quercicola	8.925235
Ampedus	PSFOR962-14	Ampedus rufipennis	PSFOR1004-14	Ampedus quercicola	11.016626
Ampedus	PSFOR962-14	Ampedus rufipennis	PSFOR540-13	Ampedus quercicola	10.831095
Ampedus	PSFOR962-14	Ampedus rufipennis	PSFOR843-13	Ampedus quercicola	10.088782
Ampedus	PSFOR962-14	Ampedus rufipennis	PSFOR541-13	Ampedus quercicola	10.831095
Ampedus	PSFOR962-14	Ampedus rufipennis	PSFOR538-13	Ampedus quercicola	10.347567
Ampedus	PSFOR962-14	Ampedus rufipennis	PSFOR1006-14	Ampedus quercicola	11.016626
Ampedus	PSFOR962-14	Ampedus rufipennis	PSFOR1005-14	Ampedus quercicola	11.016626
Ampedus	PSFOR962-14	Ampedus rufipennis	PSFOR841-13	Ampedus quercicola	10.208623
Ampedus	PSFOR962-14	Ampedus rufipennis	PSFOR937-14	Ampedus quercicola	9.542003
Ampedus	PSFOR832-13	Ampedus rufipennis	PSFOR721-13	Ampedus aurilegulus	8.567027
Ampedus	PSFOR832-13	Ampedus rufipennis	PSFOR852-13	Ampedus aurilegulus	9.771047
Ampedus	PSFOR832-13	Ampedus rufipennis	PSFOR722-13	Ampedus balteatus	11.591959
Ampedus	PSFOR832-13	Ampedus rufipennis	PSFOR957-14	Ampedus balteatus	11.181904
Ampedus	PSFOR832-13	Ampedus rufipennis	PSFOR838-13	Ampedus balteatus	11.658652
Ampedus	PSFOR832-13	Ampedus rufipennis	PSFOR1056-14	Ampedus balteatus	12.419211
Ampedus	PSFOR832-13	Ampedus rufipennis	PSFOR834-13	Ampedus brunnicornis	11.818856
Ampedus	PSFOR832-13	Ampedus rufipennis	PSFOR737-13	Ampedus brunnicornis	11.818856
Ampedus	PSFOR832-13	Ampedus rufipennis	PSFOR723-13	Ampedus cardinalis	11.765767
Ampedus	PSFOR832-13	Ampedus rufipennis	PSFOR847-13	Ampedus cardinalis	11.753936
Ampedus	PSFOR832-13	Ampedus rufipennis	PSFOR734-13	Ampedus cinnabarinus	8.7386465
Ampedus	PSFOR832-13	Ampedus rufipennis	PSFOR827-13	Ampedus elongatulus	9.838989
Ampedus	PSFOR832-13	Ampedus rufipennis	PSFOR933-14	Ampedus elongatulus	9.895322
Ampedus	PSFOR832-13	Ampedus rufipennis	PSFOR543-13	Ampedus elongatulus	9.730933
Ampedus	PSFOR832-13	Ampedus rufipennis	PSFOR854-13	Ampedus erythrogonus	13.998612
Ampedus	PSFOR832-13	Ampedus rufipennis	PSFOR853-13	Ampedus erythrogonus	13.998612
Ampedus	PSFOR832-13	Ampedus rufipennis	PSFOR726-13	Ampedus erythrogonus	14.009532
Ampedus	PSFOR832-13	Ampedus rufipennis	PSFOR936-14	Ampedus melonii	11.145257
Ampedus	PSFOR832-13	Ampedus rufipennis	PSFOR932-14	Ampedus nemoralis	9.576936
Ampedus	PSFOR832-13	Ampedus rufipennis	PSFOR528-13	Ampedus nemoralis	9.613137
Ampedus	PSFOR832-13	Ampedus rufipennis	PSFOR542-13	Ampedus nemoralis	9.783549
Ampedus	PSFOR832-13	Ampedus rufipennis	PSFOR828-13	Ampedus nigerrimus	8.7386465
Ampedus	PSFOR832-13	Ampedus rufipennis	PSFOR855-13	Ampedus nigerrimus	9.1341715
Ampedus	PSFOR832-13	Ampedus rufipennis	PSFOR338-13	Ampedus nigerrimus	8.9313345
Ampedus	PSFOR832-13	Ampedus rufipennis	PSFOR851-13	Ampedus nigerrimus	8.9313345
Ampedus	PSFOR832-13	Ampedus rufipennis	PSFOR738-13	Ampedus nigrinus	12.783511
Ampedus	PSFOR832-13	Ampedus rufipennis	PSFOR959-14	Ampedus nigrinus	13.431472
Ampedus	PSFOR832-13	Ampedus rufipennis	PSFOR837-13	Ampedus pomonae	8.978977
Ampedus	PSFOR832-13	Ampedus rufipennis	PSFOR550-13	Ampedus pomorum	10.589485
Ampedus	PSFOR832-13	Ampedus rufipennis	PSFOR529-13	Ampedus pomorum	9.783549
Ampedus	PSFOR832-13	Ampedus rufipennis	PSFOR532-13	Ampedus pomorum	9.396105
Ampedus	PSFOR832-13	Ampedus rufipennis	PSFOR530-13	Ampedus pomorum	10.589485
Ampedus	PSFOR832-13	Ampedus rufipennis	PSFOR546-13	Ampedus pomorum	10.199351
Ampedus	PSFOR832-13	Ampedus rufipennis	PSFOR547-13	Ampedus pomorum	9.783549
Ampedus	PSFOR832-13	Ampedus rufipennis	PSFOR548-13	Ampedus pomorum	9.783549
Ampedus	PSFOR832-13	Ampedus rufipennis	PSFOR544-13	Ampedus pomorum	10.044078
Ampedus	PSFOR832-13	Ampedus rufipennis	PSFOR735-13	Ampedus praestus	11.145257
Ampedus	PSFOR832-13	Ampedus rufipennis	PSFOR848-13	Ampedus praestus	10.936052
Ampedus	PSFOR832-13	Ampedus rufipennis	PSFOR842-13	Ampedus quercicola	11.032781
Ampedus	PSFOR832-13	Ampedus rufipennis	PSFOR549-13	Ampedus quercicola	10.381506
Ampedus	PSFOR832-13	Ampedus rufipennis	PSFOR1002-14	Ampedus quercicola	10.825777
Ampedus	PSFOR832-13	Ampedus rufipennis	PSFOR539-13	Ampedus quercicola	9.246228
Ampedus	PSFOR832-13	Ampedus rufipennis	PSFOR1004-14	Ampedus quercicola	11.223631
Ampedus	PSFOR832-13	Ampedus rufipennis	PSFOR540-13	Ampedus quercicola	11.011766
Ampedus	PSFOR832-13	Ampedus rufipennis	PSFOR843-13	Ampedus quercicola	10.17501
Ampedus	PSFOR832-13	Ampedus rufipennis	PSFOR541-13	Ampedus quercicola	11.011766
Ampedus	PSFOR832-13	Ampedus rufipennis	PSFOR538-13	Ampedus quercicola	10.463119
Ampedus	PSFOR832-13	Ampedus rufipennis	PSFOR1006-14	Ampedus quercicola	11.011766
Ampedus	PSFOR832-13	Ampedus rufipennis	PSFOR1005-14	Ampedus quercicola	11.223631
Ampedus	PSFOR832-13	Ampedus rufipennis	PSFOR841-13	Ampedus quercicola	10.185987
Ampedus	PSFOR832-13	Ampedus rufipennis	PSFOR937-14	Ampedus quercicola	10.268083
Ampedus	PSFOR339-13	Ampedus rufipennis	PSFOR721-13	Ampedus aurilegulus	8.353027
Ampedus	PSFOR339-13	Ampedus rufipennis	PSFOR852-13	Ampedus aurilegulus	10.043717
Ampedus	PSFOR339-13	Ampedus rufipennis	PSFOR722-13	Ampedus balteatus	10.530286
Ampedus	PSFOR339-13	Ampedus rufipennis	PSFOR957-14	Ampedus balteatus	10.241268
Ampedus	PSFOR339-13	Ampedus rufipennis	PSFOR838-13	Ampedus balteatus	10.878558
Ampedus	PSFOR339-13	Ampedus rufipennis	PSFOR1056-14	Ampedus balteatus	11.967912
Ampedus	PSFOR339-13	Ampedus rufipennis	PSFOR834-13	Ampedus brunnicornis	11.145716
Ampedus	PSFOR339-13	Ampedus rufipennis	PSFOR737-13	Ampedus brunnicornis	11.145716
Ampedus	PSFOR339-13	Ampedus rufipennis	PSFOR723-13	Ampedus cardinalis	11.70336
Ampedus	PSFOR339-13	Ampedus rufipennis	PSFOR847-13	Ampedus cardinalis	11.983876
Ampedus	PSFOR339-13	Ampedus rufipennis	PSFOR734-13	Ampedus cinnabarinus	9.161457
Ampedus	PSFOR339-13	Ampedus rufipennis	PSFOR827-13	Ampedus elongatulus	9.268399
Ampedus	PSFOR339-13	Ampedus rufipennis	PSFOR933-14	Ampedus elongatulus	9.050433
Ampedus	PSFOR339-13	Ampedus rufipennis	PSFOR543-13	Ampedus elongatulus	9.448264
Ampedus	PSFOR339-13	Ampedus rufipennis	PSFOR854-13	Ampedus erythrogonus	14.256295
Ampedus	PSFOR339-13	Ampedus rufipennis	PSFOR853-13	Ampedus erythrogonus	14.256295
Ampedus	PSFOR339-13	Ampedus rufipennis	PSFOR726-13	Ampedus erythrogonus	14.270003
Ampedus	PSFOR339-13	Ampedus rufipennis	PSFOR936-14	Ampedus melonii	10.835736
Ampedus	PSFOR339-13	Ampedus rufipennis	PSFOR932-14	Ampedus nemoralis	9.770931
Ampedus	PSFOR339-13	Ampedus rufipennis	PSFOR528-13	Ampedus nemoralis	9.53141
Ampedus	PSFOR339-13	Ampedus rufipennis	PSFOR542-13	Ampedus nemoralis	9.770931
Ampedus	PSFOR339-13	Ampedus rufipennis	PSFOR828-13	Ampedus nigerrimus	9.720413
Ampedus	PSFOR339-13	Ampedus rufipennis	PSFOR855-13	Ampedus nigerrimus	9.705727
Ampedus	PSFOR339-13	Ampedus rufipennis	PSFOR338-13	Ampedus nigerrimus	9.705727
Ampedus	PSFOR339-13	Ampedus rufipennis	PSFOR851-13	Ampedus nigerrimus	9.705727
Ampedus	PSFOR339-13	Ampedus rufipennis	PSFOR738-13	Ampedus nigrinus	12.518655
Ampedus	PSFOR339-13	Ampedus rufipennis	PSFOR959-14	Ampedus nigrinus	13.403795
Ampedus	PSFOR339-13	Ampedus rufipennis	PSFOR837-13	Ampedus pomonae	6.963254
Ampedus	PSFOR339-13	Ampedus rufipennis	PSFOR550-13	Ampedus pomorum	10.446349
Ampedus	PSFOR339-13	Ampedus rufipennis	PSFOR529-13	Ampedus pomorum	9.770931
Ampedus	PSFOR339-13	Ampedus rufipennis	PSFOR532-13	Ampedus pomorum	8.38586
Ampedus	PSFOR339-13	Ampedus rufipennis	PSFOR530-13	Ampedus pomorum	10.446349
Ampedus	PSFOR339-13	Ampedus rufipennis	PSFOR546-13	Ampedus pomorum	10.355731
Ampedus	PSFOR339-13	Ampedus rufipennis	PSFOR547-13	Ampedus pomorum	9.770931
Ampedus	PSFOR339-13	Ampedus rufipennis	PSFOR548-13	Ampedus pomorum	9.770931
Ampedus	PSFOR339-13	Ampedus rufipennis	PSFOR544-13	Ampedus pomorum	10.355731
Ampedus	PSFOR339-13	Ampedus rufipennis	PSFOR735-13	Ampedus praestus	10.835736
Ampedus	PSFOR339-13	Ampedus rufipennis	PSFOR848-13	Ampedus praestus	10.54419
Ampedus	PSFOR339-13	Ampedus rufipennis	PSFOR842-13	Ampedus quercicola	9.506174
Ampedus	PSFOR339-13	Ampedus rufipennis	PSFOR549-13	Ampedus quercicola	9.192888
Ampedus	PSFOR339-13	Ampedus rufipennis	PSFOR1002-14	Ampedus quercicola	9.770931
Ampedus	PSFOR339-13	Ampedus rufipennis	PSFOR539-13	Ampedus quercicola	8.879671
Ampedus	PSFOR339-13	Ampedus rufipennis	PSFOR1004-14	Ampedus quercicola	9.770931
Ampedus	PSFOR339-13	Ampedus rufipennis	PSFOR540-13	Ampedus quercicola	9.481072
Ampedus	PSFOR339-13	Ampedus rufipennis	PSFOR843-13	Ampedus quercicola	8.775226
Ampedus	PSFOR339-13	Ampedus rufipennis	PSFOR541-13	Ampedus quercicola	9.481072
Ampedus	PSFOR339-13	Ampedus rufipennis	PSFOR538-13	Ampedus quercicola	8.970027
Ampedus	PSFOR339-13	Ampedus rufipennis	PSFOR1006-14	Ampedus quercicola	9.481072
Ampedus	PSFOR339-13	Ampedus rufipennis	PSFOR1005-14	Ampedus quercicola	9.770931
Ampedus	PSFOR339-13	Ampedus rufipennis	PSFOR841-13	Ampedus quercicola	9.192888
Ampedus	PSFOR339-13	Ampedus rufipennis	PSFOR937-14	Ampedus quercicola	8.765757
Ampedus	PSFOR941-14	Ampedus rufipennis	PSFOR721-13	Ampedus aurilegulus	9.284957
Ampedus	PSFOR941-14	Ampedus rufipennis	PSFOR852-13	Ampedus aurilegulus	9.753375
Ampedus	PSFOR941-14	Ampedus rufipennis	PSFOR722-13	Ampedus balteatus	11.177913
Ampedus	PSFOR941-14	Ampedus rufipennis	PSFOR957-14	Ampedus balteatus	10.8190975
Ampedus	PSFOR941-14	Ampedus rufipennis	PSFOR838-13	Ampedus balteatus	11.066347
Ampedus	PSFOR941-14	Ampedus rufipennis	PSFOR1056-14	Ampedus balteatus	11.713387
Ampedus	PSFOR941-14	Ampedus rufipennis	PSFOR834-13	Ampedus brunnicornis	11.551049
Ampedus	PSFOR941-14	Ampedus rufipennis	PSFOR737-13	Ampedus brunnicornis	11.551049
Ampedus	PSFOR941-14	Ampedus rufipennis	PSFOR723-13	Ampedus cardinalis	11.678772
Ampedus	PSFOR941-14	Ampedus rufipennis	PSFOR847-13	Ampedus cardinalis	11.854345
Ampedus	PSFOR941-14	Ampedus rufipennis	PSFOR734-13	Ampedus cinnabarinus	8.674196
Ampedus	PSFOR941-14	Ampedus rufipennis	PSFOR827-13	Ampedus elongatulus	10.525037
Ampedus	PSFOR941-14	Ampedus rufipennis	PSFOR933-14	Ampedus elongatulus	10.405672
Ampedus	PSFOR941-14	Ampedus rufipennis	PSFOR543-13	Ampedus elongatulus	9.704626
Ampedus	PSFOR941-14	Ampedus rufipennis	PSFOR854-13	Ampedus erythrogonus	14.3698435
Ampedus	PSFOR941-14	Ampedus rufipennis	PSFOR853-13	Ampedus erythrogonus	13.88959
Ampedus	PSFOR941-14	Ampedus rufipennis	PSFOR726-13	Ampedus erythrogonus	14.379851
Ampedus	PSFOR941-14	Ampedus rufipennis	PSFOR936-14	Ampedus melonii	11.133278
Ampedus	PSFOR941-14	Ampedus rufipennis	PSFOR932-14	Ampedus nemoralis	10.290005
Ampedus	PSFOR941-14	Ampedus rufipennis	PSFOR528-13	Ampedus nemoralis	10.508876
Ampedus	PSFOR941-14	Ampedus rufipennis	PSFOR542-13	Ampedus nemoralis	10.473825
Ampedus	PSFOR941-14	Ampedus rufipennis	PSFOR828-13	Ampedus nigerrimus	9.722165
Ampedus	PSFOR941-14	Ampedus rufipennis	PSFOR855-13	Ampedus nigerrimus	10.0749235
Ampedus	PSFOR941-14	Ampedus rufipennis	PSFOR338-13	Ampedus nigerrimus	9.893436
Ampedus	PSFOR941-14	Ampedus rufipennis	PSFOR851-13	Ampedus nigerrimus	9.893436
Ampedus	PSFOR941-14	Ampedus rufipennis	PSFOR738-13	Ampedus nigrinus	13.307123
Ampedus	PSFOR941-14	Ampedus rufipennis	PSFOR959-14	Ampedus nigrinus	13.869625
Ampedus	PSFOR941-14	Ampedus rufipennis	PSFOR837-13	Ampedus pomonae	9.518055
Ampedus	PSFOR941-14	Ampedus rufipennis	PSFOR550-13	Ampedus pomorum	10.841644
Ampedus	PSFOR941-14	Ampedus rufipennis	PSFOR529-13	Ampedus pomorum	10.473825
Ampedus	PSFOR941-14	Ampedus rufipennis	PSFOR532-13	Ampedus pomorum	10.326758
Ampedus	PSFOR941-14	Ampedus rufipennis	PSFOR530-13	Ampedus pomorum	10.841644
Ampedus	PSFOR941-14	Ampedus rufipennis	PSFOR546-13	Ampedus pomorum	10.843517
Ampedus	PSFOR941-14	Ampedus rufipennis	PSFOR547-13	Ampedus pomorum	10.473825
Ampedus	PSFOR941-14	Ampedus rufipennis	PSFOR548-13	Ampedus pomorum	10.473825
Ampedus	PSFOR941-14	Ampedus rufipennis	PSFOR544-13	Ampedus pomorum	10.731107
Ampedus	PSFOR941-14	Ampedus rufipennis	PSFOR735-13	Ampedus praestus	11.133278
Ampedus	PSFOR941-14	Ampedus rufipennis	PSFOR848-13	Ampedus praestus	10.949117
Ampedus	PSFOR941-14	Ampedus rufipennis	PSFOR842-13	Ampedus quercicola	10.84923
Ampedus	PSFOR941-14	Ampedus rufipennis	PSFOR549-13	Ampedus quercicola	10.2786045
Ampedus	PSFOR941-14	Ampedus rufipennis	PSFOR1002-14	Ampedus quercicola	10.6627655
Ampedus	PSFOR941-14	Ampedus rufipennis	PSFOR539-13	Ampedus quercicola	9.221092
Ampedus	PSFOR941-14	Ampedus rufipennis	PSFOR1004-14	Ampedus quercicola	11.016626
Ampedus	PSFOR941-14	Ampedus rufipennis	PSFOR540-13	Ampedus quercicola	10.831095
Ampedus	PSFOR941-14	Ampedus rufipennis	PSFOR843-13	Ampedus quercicola	10.088782
Ampedus	PSFOR941-14	Ampedus rufipennis	PSFOR541-13	Ampedus quercicola	10.831095
Ampedus	PSFOR941-14	Ampedus rufipennis	PSFOR538-13	Ampedus quercicola	10.347567
Ampedus	PSFOR941-14	Ampedus rufipennis	PSFOR1006-14	Ampedus quercicola	11.016626
Ampedus	PSFOR941-14	Ampedus rufipennis	PSFOR1005-14	Ampedus quercicola	11.016626
Ampedus	PSFOR941-14	Ampedus rufipennis	PSFOR841-13	Ampedus quercicola	10.393813
Ampedus	PSFOR941-14	Ampedus rufipennis	PSFOR937-14	Ampedus quercicola	9.542003
Ampedus	PSFOR833-13	Ampedus rufipennis	PSFOR721-13	Ampedus aurilegulus	8.723156
Ampedus	PSFOR833-13	Ampedus rufipennis	PSFOR852-13	Ampedus aurilegulus	9.2108755
Ampedus	PSFOR833-13	Ampedus rufipennis	PSFOR722-13	Ampedus balteatus	10.992381
Ampedus	PSFOR833-13	Ampedus rufipennis	PSFOR957-14	Ampedus balteatus	10.634595
Ampedus	PSFOR833-13	Ampedus rufipennis	PSFOR838-13	Ampedus balteatus	10.880128
Ampedus	PSFOR833-13	Ampedus rufipennis	PSFOR1056-14	Ampedus balteatus	11.526469
Ampedus	PSFOR833-13	Ampedus rufipennis	PSFOR834-13	Ampedus brunnicornis	10.992381
Ampedus	PSFOR833-13	Ampedus rufipennis	PSFOR737-13	Ampedus brunnicornis	10.992381
Ampedus	PSFOR833-13	Ampedus rufipennis	PSFOR723-13	Ampedus cardinalis	11.4929
Ampedus	PSFOR833-13	Ampedus rufipennis	PSFOR847-13	Ampedus cardinalis	11.668124
Ampedus	PSFOR833-13	Ampedus rufipennis	PSFOR734-13	Ampedus cinnabarinus	7.7923417
Ampedus	PSFOR833-13	Ampedus rufipennis	PSFOR827-13	Ampedus elongatulus	10.339851
Ampedus	PSFOR833-13	Ampedus rufipennis	PSFOR933-14	Ampedus elongatulus	10.034614
Ampedus	PSFOR833-13	Ampedus rufipennis	PSFOR543-13	Ampedus elongatulus	9.408765
Ampedus	PSFOR833-13	Ampedus rufipennis	PSFOR854-13	Ampedus erythrogonus	14.178276
Ampedus	PSFOR833-13	Ampedus rufipennis	PSFOR853-13	Ampedus erythrogonus	13.683406
Ampedus	PSFOR833-13	Ampedus rufipennis	PSFOR726-13	Ampedus erythrogonus	14.18791
Ampedus	PSFOR833-13	Ampedus rufipennis	PSFOR936-14	Ampedus melonii	10.949117
Ampedus	PSFOR833-13	Ampedus rufipennis	PSFOR932-14	Ampedus nemoralis	10.106858
Ampedus	PSFOR833-13	Ampedus rufipennis	PSFOR528-13	Ampedus nemoralis	10.140551
Ampedus	PSFOR833-13	Ampedus rufipennis	PSFOR542-13	Ampedus nemoralis	10.290005
Ampedus	PSFOR833-13	Ampedus rufipennis	PSFOR828-13	Ampedus nigerrimus	9.5416565
Ampedus	PSFOR833-13	Ampedus rufipennis	PSFOR855-13	Ampedus nigerrimus	9.893436
Ampedus	PSFOR833-13	Ampedus rufipennis	PSFOR338-13	Ampedus nigerrimus	9.712603
Ampedus	PSFOR833-13	Ampedus rufipennis	PSFOR851-13	Ampedus nigerrimus	9.712603
Ampedus	PSFOR833-13	Ampedus rufipennis	PSFOR738-13	Ampedus nigrinus	13.117008
Ampedus	PSFOR833-13	Ampedus rufipennis	PSFOR959-14	Ampedus nigrinus	13.677688
Ampedus	PSFOR833-13	Ampedus rufipennis	PSFOR837-13	Ampedus pomonae	8.929813
Ampedus	PSFOR833-13	Ampedus rufipennis	PSFOR550-13	Ampedus pomorum	10.541342
Ampedus	PSFOR833-13	Ampedus rufipennis	PSFOR529-13	Ampedus pomorum	10.290005
Ampedus	PSFOR833-13	Ampedus rufipennis	PSFOR532-13	Ampedus pomorum	9.776291
Ampedus	PSFOR833-13	Ampedus rufipennis	PSFOR530-13	Ampedus pomorum	10.541342
Ampedus	PSFOR833-13	Ampedus rufipennis	PSFOR546-13	Ampedus pomorum	10.658331
Ampedus	PSFOR833-13	Ampedus rufipennis	PSFOR547-13	Ampedus pomorum	10.290005
Ampedus	PSFOR833-13	Ampedus rufipennis	PSFOR548-13	Ampedus pomorum	10.290005
Ampedus	PSFOR833-13	Ampedus rufipennis	PSFOR544-13	Ampedus pomorum	10.539168
Ampedus	PSFOR833-13	Ampedus rufipennis	PSFOR735-13	Ampedus praestus	10.949117
Ampedus	PSFOR833-13	Ampedus rufipennis	PSFOR848-13	Ampedus praestus	10.765625
Ampedus	PSFOR833-13	Ampedus rufipennis	PSFOR842-13	Ampedus quercicola	10.84923
Ampedus	PSFOR833-13	Ampedus rufipennis	PSFOR549-13	Ampedus quercicola	10.2786045
Ampedus	PSFOR833-13	Ampedus rufipennis	PSFOR1002-14	Ampedus quercicola	10.6627655
Ampedus	PSFOR833-13	Ampedus rufipennis	PSFOR539-13	Ampedus quercicola	8.925235
Ampedus	PSFOR833-13	Ampedus rufipennis	PSFOR1004-14	Ampedus quercicola	11.016626
Ampedus	PSFOR833-13	Ampedus rufipennis	PSFOR540-13	Ampedus quercicola	10.831095
Ampedus	PSFOR833-13	Ampedus rufipennis	PSFOR843-13	Ampedus quercicola	10.088782
Ampedus	PSFOR833-13	Ampedus rufipennis	PSFOR541-13	Ampedus quercicola	10.831095
Ampedus	PSFOR833-13	Ampedus rufipennis	PSFOR538-13	Ampedus quercicola	10.347567
Ampedus	PSFOR833-13	Ampedus rufipennis	PSFOR1006-14	Ampedus quercicola	11.016626
Ampedus	PSFOR833-13	Ampedus rufipennis	PSFOR1005-14	Ampedus quercicola	11.016626
Ampedus	PSFOR833-13	Ampedus rufipennis	PSFOR841-13	Ampedus quercicola	10.208623
Ampedus	PSFOR833-13	Ampedus rufipennis	PSFOR937-14	Ampedus quercicola	9.542003
Ampedus	PSFOR1057-14	Ampedus sanguineus	PSFOR721-13	Ampedus aurilegulus	2.4476604
Ampedus	PSFOR1057-14	Ampedus sanguineus	PSFOR852-13	Ampedus aurilegulus	2.6584613
Ampedus	PSFOR1057-14	Ampedus sanguineus	PSFOR722-13	Ampedus balteatus	12.405597
Ampedus	PSFOR1057-14	Ampedus sanguineus	PSFOR957-14	Ampedus balteatus	12.417206
Ampedus	PSFOR1057-14	Ampedus sanguineus	PSFOR838-13	Ampedus balteatus	12.489661
Ampedus	PSFOR1057-14	Ampedus sanguineus	PSFOR1056-14	Ampedus balteatus	13.330735
Ampedus	PSFOR1057-14	Ampedus sanguineus	PSFOR834-13	Ampedus brunnicornis	11.824031
Ampedus	PSFOR1057-14	Ampedus sanguineus	PSFOR737-13	Ampedus brunnicornis	11.824031
Ampedus	PSFOR1057-14	Ampedus sanguineus	PSFOR723-13	Ampedus cardinalis	12.961553
Ampedus	PSFOR1057-14	Ampedus sanguineus	PSFOR847-13	Ampedus cardinalis	13.139897
Ampedus	PSFOR1057-14	Ampedus sanguineus	PSFOR734-13	Ampedus cinnabarinus	11.56399
Ampedus	PSFOR1057-14	Ampedus sanguineus	PSFOR827-13	Ampedus elongatulus	11.738662
Ampedus	PSFOR1057-14	Ampedus sanguineus	PSFOR933-14	Ampedus elongatulus	11.811684
Ampedus	PSFOR1057-14	Ampedus sanguineus	PSFOR543-13	Ampedus elongatulus	12.395785
Ampedus	PSFOR1057-14	Ampedus sanguineus	PSFOR854-13	Ampedus erythrogonus	17.015501
Ampedus	PSFOR1057-14	Ampedus sanguineus	PSFOR853-13	Ampedus erythrogonus	16.959839
Ampedus	PSFOR1057-14	Ampedus sanguineus	PSFOR726-13	Ampedus erythrogonus	17.026392
Ampedus	PSFOR1057-14	Ampedus sanguineus	PSFOR936-14	Ampedus melonii	12.594275
Ampedus	PSFOR1057-14	Ampedus sanguineus	PSFOR932-14	Ampedus nemoralis	12.441761
Ampedus	PSFOR1057-14	Ampedus sanguineus	PSFOR528-13	Ampedus nemoralis	12.117443
Ampedus	PSFOR1057-14	Ampedus sanguineus	PSFOR542-13	Ampedus nemoralis	12.252727
Ampedus	PSFOR1057-14	Ampedus sanguineus	PSFOR828-13	Ampedus nigerrimus	11.340248
Ampedus	PSFOR1057-14	Ampedus sanguineus	PSFOR855-13	Ampedus nigerrimus	11.701408
Ampedus	PSFOR1057-14	Ampedus sanguineus	PSFOR338-13	Ampedus nigerrimus	11.51484
Ampedus	PSFOR1057-14	Ampedus sanguineus	PSFOR851-13	Ampedus nigerrimus	11.51484
Ampedus	PSFOR1057-14	Ampedus sanguineus	PSFOR738-13	Ampedus nigrinus	14.813759
Ampedus	PSFOR1057-14	Ampedus sanguineus	PSFOR959-14	Ampedus nigrinus	15.192476
Ampedus	PSFOR1057-14	Ampedus sanguineus	PSFOR837-13	Ampedus pomonae	12.897864
Ampedus	PSFOR1057-14	Ampedus sanguineus	PSFOR550-13	Ampedus pomorum	13.258977
Ampedus	PSFOR1057-14	Ampedus sanguineus	PSFOR529-13	Ampedus pomorum	12.252727
Ampedus	PSFOR1057-14	Ampedus sanguineus	PSFOR532-13	Ampedus pomorum	11.725804
Ampedus	PSFOR1057-14	Ampedus sanguineus	PSFOR530-13	Ampedus pomorum	13.258977
Ampedus	PSFOR1057-14	Ampedus sanguineus	PSFOR546-13	Ampedus pomorum	12.441761
Ampedus	PSFOR1057-14	Ampedus sanguineus	PSFOR547-13	Ampedus pomorum	12.252727
Ampedus	PSFOR1057-14	Ampedus sanguineus	PSFOR548-13	Ampedus pomorum	12.252727
Ampedus	PSFOR1057-14	Ampedus sanguineus	PSFOR544-13	Ampedus pomorum	12.3884115
Ampedus	PSFOR1057-14	Ampedus sanguineus	PSFOR735-13	Ampedus praestus	12.594275
Ampedus	PSFOR1057-14	Ampedus sanguineus	PSFOR848-13	Ampedus praestus	12.7836685
Ampedus	PSFOR1057-14	Ampedus sanguineus	PSFOR842-13	Ampedus quercicola	12.150592
Ampedus	PSFOR1057-14	Ampedus sanguineus	PSFOR549-13	Ampedus quercicola	11.751964
Ampedus	PSFOR1057-14	Ampedus sanguineus	PSFOR1002-14	Ampedus quercicola	11.612067
Ampedus	PSFOR1057-14	Ampedus sanguineus	PSFOR539-13	Ampedus quercicola	10.161255
Ampedus	PSFOR1057-14	Ampedus sanguineus	PSFOR1004-14	Ampedus quercicola	11.940643
Ampedus	PSFOR1057-14	Ampedus sanguineus	PSFOR540-13	Ampedus quercicola	12.130037
Ampedus	PSFOR1057-14	Ampedus sanguineus	PSFOR843-13	Ampedus quercicola	11.703876
Ampedus	PSFOR1057-14	Ampedus sanguineus	PSFOR541-13	Ampedus quercicola	12.130037
Ampedus	PSFOR1057-14	Ampedus sanguineus	PSFOR538-13	Ampedus quercicola	11.6643
Ampedus	PSFOR1057-14	Ampedus sanguineus	PSFOR1006-14	Ampedus quercicola	12.3201475
Ampedus	PSFOR1057-14	Ampedus sanguineus	PSFOR1005-14	Ampedus quercicola	11.940643
Ampedus	PSFOR1057-14	Ampedus sanguineus	PSFOR841-13	Ampedus quercicola	11.695568
Ampedus	PSFOR1057-14	Ampedus sanguineus	PSFOR937-14	Ampedus quercicola	12.191595
Ampedus	PSFOR1057-14	Ampedus sanguineus	PSFOR840-13	Ampedus rufipennis	9.242915
Ampedus	PSFOR1057-14	Ampedus sanguineus	PSFOR962-14	Ampedus rufipennis	9.242915
Ampedus	PSFOR1057-14	Ampedus sanguineus	PSFOR832-13	Ampedus rufipennis	8.578094
Ampedus	PSFOR1057-14	Ampedus sanguineus	PSFOR339-13	Ampedus rufipennis	9.809945
Ampedus	PSFOR1057-14	Ampedus sanguineus	PSFOR941-14	Ampedus rufipennis	9.424078
Ampedus	PSFOR1057-14	Ampedus sanguineus	PSFOR833-13	Ampedus rufipennis	9.242915
Ampedus	PSFOR844-13	Ampedus sanguineus	PSFOR721-13	Ampedus aurilegulus	2.6114738
Ampedus	PSFOR844-13	Ampedus sanguineus	PSFOR852-13	Ampedus aurilegulus	2.8160625
Ampedus	PSFOR844-13	Ampedus sanguineus	PSFOR722-13	Ampedus balteatus	12.961553
Ampedus	PSFOR844-13	Ampedus sanguineus	PSFOR957-14	Ampedus balteatus	12.973783
Ampedus	PSFOR844-13	Ampedus sanguineus	PSFOR838-13	Ampedus balteatus	13.049782
Ampedus	PSFOR844-13	Ampedus sanguineus	PSFOR1056-14	Ampedus balteatus	13.894524
Ampedus	PSFOR844-13	Ampedus sanguineus	PSFOR834-13	Ampedus brunnicornis	12.373493
Ampedus	PSFOR844-13	Ampedus sanguineus	PSFOR737-13	Ampedus brunnicornis	12.373493
Ampedus	PSFOR844-13	Ampedus sanguineus	PSFOR723-13	Ampedus cardinalis	13.522307
Ampedus	PSFOR844-13	Ampedus sanguineus	PSFOR847-13	Ampedus cardinalis	13.701844
Ampedus	PSFOR844-13	Ampedus sanguineus	PSFOR734-13	Ampedus cinnabarinus	12.116027
Ampedus	PSFOR844-13	Ampedus sanguineus	PSFOR827-13	Ampedus elongatulus	12.291848
Ampedus	PSFOR844-13	Ampedus sanguineus	PSFOR933-14	Ampedus elongatulus	12.368592
Ampedus	PSFOR844-13	Ampedus sanguineus	PSFOR543-13	Ampedus elongatulus	13.022755
Ampedus	PSFOR844-13	Ampedus sanguineus	PSFOR854-13	Ampedus erythrogonus	17.605131
Ampedus	PSFOR844-13	Ampedus sanguineus	PSFOR853-13	Ampedus erythrogonus	17.39368
Ampedus	PSFOR844-13	Ampedus sanguineus	PSFOR726-13	Ampedus erythrogonus	17.61671
Ampedus	PSFOR844-13	Ampedus sanguineus	PSFOR936-14	Ampedus melonii	13.152027
Ampedus	PSFOR844-13	Ampedus sanguineus	PSFOR932-14	Ampedus nemoralis	12.999606
Ampedus	PSFOR844-13	Ampedus sanguineus	PSFOR528-13	Ampedus nemoralis	12.674384
Ampedus	PSFOR844-13	Ampedus sanguineus	PSFOR542-13	Ampedus nemoralis	12.808763
Ampedus	PSFOR844-13	Ampedus sanguineus	PSFOR828-13	Ampedus nigerrimus	11.888676
Ampedus	PSFOR844-13	Ampedus sanguineus	PSFOR855-13	Ampedus nigerrimus	12.252727
Ampedus	PSFOR844-13	Ampedus sanguineus	PSFOR338-13	Ampedus nigerrimus	12.0644045
Ampedus	PSFOR844-13	Ampedus sanguineus	PSFOR851-13	Ampedus nigerrimus	12.0644045
Ampedus	PSFOR844-13	Ampedus sanguineus	PSFOR738-13	Ampedus nigrinus	15.389328
Ampedus	PSFOR844-13	Ampedus sanguineus	PSFOR959-14	Ampedus nigrinus	15.771241
Ampedus	PSFOR844-13	Ampedus sanguineus	PSFOR837-13	Ampedus pomonae	13.318033
Ampedus	PSFOR844-13	Ampedus sanguineus	PSFOR550-13	Ampedus pomorum	13.891899
Ampedus	PSFOR844-13	Ampedus sanguineus	PSFOR529-13	Ampedus pomorum	12.808763
Ampedus	PSFOR844-13	Ampedus sanguineus	PSFOR532-13	Ampedus pomorum	12.278364
Ampedus	PSFOR844-13	Ampedus sanguineus	PSFOR530-13	Ampedus pomorum	13.891899
Ampedus	PSFOR844-13	Ampedus sanguineus	PSFOR546-13	Ampedus pomorum	12.999606
Ampedus	PSFOR844-13	Ampedus sanguineus	PSFOR547-13	Ampedus pomorum	12.808763
Ampedus	PSFOR844-13	Ampedus sanguineus	PSFOR548-13	Ampedus pomorum	12.808763
Ampedus	PSFOR844-13	Ampedus sanguineus	PSFOR544-13	Ampedus pomorum	12.769158
Ampedus	PSFOR844-13	Ampedus sanguineus	PSFOR735-13	Ampedus praestus	13.152027
Ampedus	PSFOR844-13	Ampedus sanguineus	PSFOR848-13	Ampedus praestus	13.343234
Ampedus	PSFOR844-13	Ampedus sanguineus	PSFOR842-13	Ampedus quercicola	12.709053
Ampedus	PSFOR844-13	Ampedus sanguineus	PSFOR549-13	Ampedus quercicola	12.305779
Ampedus	PSFOR844-13	Ampedus sanguineus	PSFOR1002-14	Ampedus quercicola	11.987513
Ampedus	PSFOR844-13	Ampedus sanguineus	PSFOR539-13	Ampedus quercicola	10.772878
Ampedus	PSFOR844-13	Ampedus sanguineus	PSFOR1004-14	Ampedus quercicola	12.496254
Ampedus	PSFOR844-13	Ampedus sanguineus	PSFOR540-13	Ampedus quercicola	12.687461
Ampedus	PSFOR844-13	Ampedus sanguineus	PSFOR843-13	Ampedus quercicola	12.10664
Ampedus	PSFOR844-13	Ampedus sanguineus	PSFOR541-13	Ampedus quercicola	12.687461
Ampedus	PSFOR844-13	Ampedus sanguineus	PSFOR538-13	Ampedus quercicola	12.035969
Ampedus	PSFOR844-13	Ampedus sanguineus	PSFOR1006-14	Ampedus quercicola	12.879398
Ampedus	PSFOR844-13	Ampedus sanguineus	PSFOR1005-14	Ampedus quercicola	12.496254
Ampedus	PSFOR844-13	Ampedus sanguineus	PSFOR841-13	Ampedus quercicola	12.254425
Ampedus	PSFOR844-13	Ampedus sanguineus	PSFOR937-14	Ampedus quercicola	12.442219
Ampedus	PSFOR844-13	Ampedus sanguineus	PSFOR840-13	Ampedus rufipennis	9.776291
Ampedus	PSFOR844-13	Ampedus sanguineus	PSFOR962-14	Ampedus rufipennis	9.776291
Ampedus	PSFOR844-13	Ampedus sanguineus	PSFOR832-13	Ampedus rufipennis	8.985426
Ampedus	PSFOR844-13	Ampedus sanguineus	PSFOR339-13	Ampedus rufipennis	10.103203
Ampedus	PSFOR844-13	Ampedus sanguineus	PSFOR941-14	Ampedus rufipennis	9.959105
Ampedus	PSFOR844-13	Ampedus sanguineus	PSFOR833-13	Ampedus rufipennis	9.776291
Ampedus	PSFOR1003-14	Ampedus sanguineus	PSFOR721-13	Ampedus aurilegulus	2.4476604
Ampedus	PSFOR1003-14	Ampedus sanguineus	PSFOR852-13	Ampedus aurilegulus	2.6584613
Ampedus	PSFOR1003-14	Ampedus sanguineus	PSFOR722-13	Ampedus balteatus	12.405597
Ampedus	PSFOR1003-14	Ampedus sanguineus	PSFOR957-14	Ampedus balteatus	12.417206
Ampedus	PSFOR1003-14	Ampedus sanguineus	PSFOR838-13	Ampedus balteatus	12.489661
Ampedus	PSFOR1003-14	Ampedus sanguineus	PSFOR1056-14	Ampedus balteatus	13.330735
Ampedus	PSFOR1003-14	Ampedus sanguineus	PSFOR834-13	Ampedus brunnicornis	11.824031
Ampedus	PSFOR1003-14	Ampedus sanguineus	PSFOR737-13	Ampedus brunnicornis	11.824031
Ampedus	PSFOR1003-14	Ampedus sanguineus	PSFOR723-13	Ampedus cardinalis	12.961553
Ampedus	PSFOR1003-14	Ampedus sanguineus	PSFOR847-13	Ampedus cardinalis	13.139897
Ampedus	PSFOR1003-14	Ampedus sanguineus	PSFOR734-13	Ampedus cinnabarinus	11.56399
Ampedus	PSFOR1003-14	Ampedus sanguineus	PSFOR827-13	Ampedus elongatulus	11.738662
Ampedus	PSFOR1003-14	Ampedus sanguineus	PSFOR933-14	Ampedus elongatulus	11.811684
Ampedus	PSFOR1003-14	Ampedus sanguineus	PSFOR543-13	Ampedus elongatulus	12.395785
Ampedus	PSFOR1003-14	Ampedus sanguineus	PSFOR854-13	Ampedus erythrogonus	17.015501
Ampedus	PSFOR1003-14	Ampedus sanguineus	PSFOR853-13	Ampedus erythrogonus	16.959839
Ampedus	PSFOR1003-14	Ampedus sanguineus	PSFOR726-13	Ampedus erythrogonus	17.026392
Ampedus	PSFOR1003-14	Ampedus sanguineus	PSFOR936-14	Ampedus melonii	12.594275
Ampedus	PSFOR1003-14	Ampedus sanguineus	PSFOR932-14	Ampedus nemoralis	12.441761
Ampedus	PSFOR1003-14	Ampedus sanguineus	PSFOR528-13	Ampedus nemoralis	12.117443
Ampedus	PSFOR1003-14	Ampedus sanguineus	PSFOR542-13	Ampedus nemoralis	12.252727
Ampedus	PSFOR1003-14	Ampedus sanguineus	PSFOR828-13	Ampedus nigerrimus	11.340248
Ampedus	PSFOR1003-14	Ampedus sanguineus	PSFOR855-13	Ampedus nigerrimus	11.701408
Ampedus	PSFOR1003-14	Ampedus sanguineus	PSFOR338-13	Ampedus nigerrimus	11.51484
Ampedus	PSFOR1003-14	Ampedus sanguineus	PSFOR851-13	Ampedus nigerrimus	11.51484
Ampedus	PSFOR1003-14	Ampedus sanguineus	PSFOR738-13	Ampedus nigrinus	14.813759
Ampedus	PSFOR1003-14	Ampedus sanguineus	PSFOR959-14	Ampedus nigrinus	15.192476
Ampedus	PSFOR1003-14	Ampedus sanguineus	PSFOR837-13	Ampedus pomonae	12.897864
Ampedus	PSFOR1003-14	Ampedus sanguineus	PSFOR550-13	Ampedus pomorum	13.258977
Ampedus	PSFOR1003-14	Ampedus sanguineus	PSFOR529-13	Ampedus pomorum	12.252727
Ampedus	PSFOR1003-14	Ampedus sanguineus	PSFOR532-13	Ampedus pomorum	11.725804
Ampedus	PSFOR1003-14	Ampedus sanguineus	PSFOR530-13	Ampedus pomorum	13.258977
Ampedus	PSFOR1003-14	Ampedus sanguineus	PSFOR546-13	Ampedus pomorum	12.441761
Ampedus	PSFOR1003-14	Ampedus sanguineus	PSFOR547-13	Ampedus pomorum	12.252727
Ampedus	PSFOR1003-14	Ampedus sanguineus	PSFOR548-13	Ampedus pomorum	12.252727
Ampedus	PSFOR1003-14	Ampedus sanguineus	PSFOR544-13	Ampedus pomorum	12.3884115
Ampedus	PSFOR1003-14	Ampedus sanguineus	PSFOR735-13	Ampedus praestus	12.594275
Ampedus	PSFOR1003-14	Ampedus sanguineus	PSFOR848-13	Ampedus praestus	12.7836685
Ampedus	PSFOR1003-14	Ampedus sanguineus	PSFOR842-13	Ampedus quercicola	12.150592
Ampedus	PSFOR1003-14	Ampedus sanguineus	PSFOR549-13	Ampedus quercicola	11.751964
Ampedus	PSFOR1003-14	Ampedus sanguineus	PSFOR1002-14	Ampedus quercicola	11.612067
Ampedus	PSFOR1003-14	Ampedus sanguineus	PSFOR539-13	Ampedus quercicola	10.161255
Ampedus	PSFOR1003-14	Ampedus sanguineus	PSFOR1004-14	Ampedus quercicola	11.940643
Ampedus	PSFOR1003-14	Ampedus sanguineus	PSFOR540-13	Ampedus quercicola	12.130037
Ampedus	PSFOR1003-14	Ampedus sanguineus	PSFOR843-13	Ampedus quercicola	11.703876
Ampedus	PSFOR1003-14	Ampedus sanguineus	PSFOR541-13	Ampedus quercicola	12.130037
Ampedus	PSFOR1003-14	Ampedus sanguineus	PSFOR538-13	Ampedus quercicola	11.6643
Ampedus	PSFOR1003-14	Ampedus sanguineus	PSFOR1006-14	Ampedus quercicola	12.3201475
Ampedus	PSFOR1003-14	Ampedus sanguineus	PSFOR1005-14	Ampedus quercicola	11.940643
Ampedus	PSFOR1003-14	Ampedus sanguineus	PSFOR841-13	Ampedus quercicola	11.695568
Ampedus	PSFOR1003-14	Ampedus sanguineus	PSFOR937-14	Ampedus quercicola	12.191595
Ampedus	PSFOR1003-14	Ampedus sanguineus	PSFOR840-13	Ampedus rufipennis	9.242915
Ampedus	PSFOR1003-14	Ampedus sanguineus	PSFOR962-14	Ampedus rufipennis	9.242915
Ampedus	PSFOR1003-14	Ampedus sanguineus	PSFOR832-13	Ampedus rufipennis	8.578094
Ampedus	PSFOR1003-14	Ampedus sanguineus	PSFOR339-13	Ampedus rufipennis	9.809945
Ampedus	PSFOR1003-14	Ampedus sanguineus	PSFOR941-14	Ampedus rufipennis	9.424078
Ampedus	PSFOR1003-14	Ampedus sanguineus	PSFOR833-13	Ampedus rufipennis	9.242915
Ampedus	PSFOR845-13	Ampedus sanguineus	PSFOR721-13	Ampedus aurilegulus	2.4476604
Ampedus	PSFOR845-13	Ampedus sanguineus	PSFOR852-13	Ampedus aurilegulus	2.6584613
Ampedus	PSFOR845-13	Ampedus sanguineus	PSFOR722-13	Ampedus balteatus	12.405597
Ampedus	PSFOR845-13	Ampedus sanguineus	PSFOR957-14	Ampedus balteatus	12.417206
Ampedus	PSFOR845-13	Ampedus sanguineus	PSFOR838-13	Ampedus balteatus	12.489661
Ampedus	PSFOR845-13	Ampedus sanguineus	PSFOR1056-14	Ampedus balteatus	13.330735
Ampedus	PSFOR845-13	Ampedus sanguineus	PSFOR834-13	Ampedus brunnicornis	11.824031
Ampedus	PSFOR845-13	Ampedus sanguineus	PSFOR737-13	Ampedus brunnicornis	11.824031
Ampedus	PSFOR845-13	Ampedus sanguineus	PSFOR723-13	Ampedus cardinalis	12.961553
Ampedus	PSFOR845-13	Ampedus sanguineus	PSFOR847-13	Ampedus cardinalis	13.139897
Ampedus	PSFOR845-13	Ampedus sanguineus	PSFOR734-13	Ampedus cinnabarinus	11.56399
Ampedus	PSFOR845-13	Ampedus sanguineus	PSFOR827-13	Ampedus elongatulus	11.738662
Ampedus	PSFOR845-13	Ampedus sanguineus	PSFOR933-14	Ampedus elongatulus	11.811684
Ampedus	PSFOR845-13	Ampedus sanguineus	PSFOR543-13	Ampedus elongatulus	12.395785
Ampedus	PSFOR845-13	Ampedus sanguineus	PSFOR854-13	Ampedus erythrogonus	17.015501
Ampedus	PSFOR845-13	Ampedus sanguineus	PSFOR853-13	Ampedus erythrogonus	16.959839
Ampedus	PSFOR845-13	Ampedus sanguineus	PSFOR726-13	Ampedus erythrogonus	17.026392
Ampedus	PSFOR845-13	Ampedus sanguineus	PSFOR936-14	Ampedus melonii	12.594275
Ampedus	PSFOR845-13	Ampedus sanguineus	PSFOR932-14	Ampedus nemoralis	12.441761
Ampedus	PSFOR845-13	Ampedus sanguineus	PSFOR528-13	Ampedus nemoralis	12.117443
Ampedus	PSFOR845-13	Ampedus sanguineus	PSFOR542-13	Ampedus nemoralis	12.252727
Ampedus	PSFOR845-13	Ampedus sanguineus	PSFOR828-13	Ampedus nigerrimus	11.340248
Ampedus	PSFOR845-13	Ampedus sanguineus	PSFOR855-13	Ampedus nigerrimus	11.701408
Ampedus	PSFOR845-13	Ampedus sanguineus	PSFOR338-13	Ampedus nigerrimus	11.51484
Ampedus	PSFOR845-13	Ampedus sanguineus	PSFOR851-13	Ampedus nigerrimus	11.51484
Ampedus	PSFOR845-13	Ampedus sanguineus	PSFOR738-13	Ampedus nigrinus	14.813759
Ampedus	PSFOR845-13	Ampedus sanguineus	PSFOR959-14	Ampedus nigrinus	15.192476
Ampedus	PSFOR845-13	Ampedus sanguineus	PSFOR837-13	Ampedus pomonae	12.897864
Ampedus	PSFOR845-13	Ampedus sanguineus	PSFOR550-13	Ampedus pomorum	13.258977
Ampedus	PSFOR845-13	Ampedus sanguineus	PSFOR529-13	Ampedus pomorum	12.252727
Ampedus	PSFOR845-13	Ampedus sanguineus	PSFOR532-13	Ampedus pomorum	11.725804
Ampedus	PSFOR845-13	Ampedus sanguineus	PSFOR530-13	Ampedus pomorum	13.258977
Ampedus	PSFOR845-13	Ampedus sanguineus	PSFOR546-13	Ampedus pomorum	12.441761
Ampedus	PSFOR845-13	Ampedus sanguineus	PSFOR547-13	Ampedus pomorum	12.252727
Ampedus	PSFOR845-13	Ampedus sanguineus	PSFOR548-13	Ampedus pomorum	12.252727
Ampedus	PSFOR845-13	Ampedus sanguineus	PSFOR544-13	Ampedus pomorum	12.3884115
Ampedus	PSFOR845-13	Ampedus sanguineus	PSFOR735-13	Ampedus praestus	12.594275
Ampedus	PSFOR845-13	Ampedus sanguineus	PSFOR848-13	Ampedus praestus	12.7836685
Ampedus	PSFOR845-13	Ampedus sanguineus	PSFOR842-13	Ampedus quercicola	12.150592
Ampedus	PSFOR845-13	Ampedus sanguineus	PSFOR549-13	Ampedus quercicola	11.751964
Ampedus	PSFOR845-13	Ampedus sanguineus	PSFOR1002-14	Ampedus quercicola	11.612067
Ampedus	PSFOR845-13	Ampedus sanguineus	PSFOR539-13	Ampedus quercicola	10.161255
Ampedus	PSFOR845-13	Ampedus sanguineus	PSFOR1004-14	Ampedus quercicola	11.940643
Ampedus	PSFOR845-13	Ampedus sanguineus	PSFOR540-13	Ampedus quercicola	12.130037
Ampedus	PSFOR845-13	Ampedus sanguineus	PSFOR843-13	Ampedus quercicola	11.703876
Ampedus	PSFOR845-13	Ampedus sanguineus	PSFOR541-13	Ampedus quercicola	12.130037
Ampedus	PSFOR845-13	Ampedus sanguineus	PSFOR538-13	Ampedus quercicola	11.6643
Ampedus	PSFOR845-13	Ampedus sanguineus	PSFOR1006-14	Ampedus quercicola	12.3201475
Ampedus	PSFOR845-13	Ampedus sanguineus	PSFOR1005-14	Ampedus quercicola	11.940643
Ampedus	PSFOR845-13	Ampedus sanguineus	PSFOR841-13	Ampedus quercicola	11.695568
Ampedus	PSFOR845-13	Ampedus sanguineus	PSFOR937-14	Ampedus quercicola	12.191595
Ampedus	PSFOR845-13	Ampedus sanguineus	PSFOR840-13	Ampedus rufipennis	9.242915
Ampedus	PSFOR845-13	Ampedus sanguineus	PSFOR962-14	Ampedus rufipennis	9.242915
Ampedus	PSFOR845-13	Ampedus sanguineus	PSFOR832-13	Ampedus rufipennis	8.578094
Ampedus	PSFOR845-13	Ampedus sanguineus	PSFOR339-13	Ampedus rufipennis	9.809945
Ampedus	PSFOR845-13	Ampedus sanguineus	PSFOR941-14	Ampedus rufipennis	9.424078
Ampedus	PSFOR845-13	Ampedus sanguineus	PSFOR833-13	Ampedus rufipennis	9.242915
Ampedus	PSFOR839-13	Ampedus sanguinolentus	PSFOR721-13	Ampedus aurilegulus	11.694099
Ampedus	PSFOR839-13	Ampedus sanguinolentus	PSFOR852-13	Ampedus aurilegulus	12.6448345
Ampedus	PSFOR839-13	Ampedus sanguinolentus	PSFOR722-13	Ampedus balteatus	12.009907
Ampedus	PSFOR839-13	Ampedus sanguinolentus	PSFOR957-14	Ampedus balteatus	12.019908
Ampedus	PSFOR839-13	Ampedus sanguinolentus	PSFOR838-13	Ampedus balteatus	12.100984
Ampedus	PSFOR839-13	Ampedus sanguinolentus	PSFOR1056-14	Ampedus balteatus	12.927611
Ampedus	PSFOR839-13	Ampedus sanguinolentus	PSFOR834-13	Ampedus brunnicornis	12.973783
Ampedus	PSFOR839-13	Ampedus sanguinolentus	PSFOR737-13	Ampedus brunnicornis	12.973783
Ampedus	PSFOR839-13	Ampedus sanguinolentus	PSFOR723-13	Ampedus cardinalis	12.041258
Ampedus	PSFOR839-13	Ampedus sanguinolentus	PSFOR847-13	Ampedus cardinalis	11.843792
Ampedus	PSFOR839-13	Ampedus sanguinolentus	PSFOR734-13	Ampedus cinnabarinus	10.796409
Ampedus	PSFOR839-13	Ampedus sanguinolentus	PSFOR827-13	Ampedus elongatulus	11.364135
Ampedus	PSFOR839-13	Ampedus sanguinolentus	PSFOR933-14	Ampedus elongatulus	11.246705
Ampedus	PSFOR839-13	Ampedus sanguinolentus	PSFOR543-13	Ampedus elongatulus	11.406918
Ampedus	PSFOR839-13	Ampedus sanguinolentus	PSFOR854-13	Ampedus erythrogonus	15.306154
Ampedus	PSFOR839-13	Ampedus sanguinolentus	PSFOR853-13	Ampedus erythrogonus	15.319973
Ampedus	PSFOR839-13	Ampedus sanguinolentus	PSFOR726-13	Ampedus erythrogonus	15.3165655
Ampedus	PSFOR839-13	Ampedus sanguinolentus	PSFOR936-14	Ampedus melonii	12.405597
Ampedus	PSFOR839-13	Ampedus sanguinolentus	PSFOR932-14	Ampedus nemoralis	11.154721
Ampedus	PSFOR839-13	Ampedus sanguinolentus	PSFOR528-13	Ampedus nemoralis	11.378329
Ampedus	PSFOR839-13	Ampedus sanguinolentus	PSFOR542-13	Ampedus nemoralis	11.340248
Ampedus	PSFOR839-13	Ampedus sanguinolentus	PSFOR828-13	Ampedus nigerrimus	9.874945
Ampedus	PSFOR839-13	Ampedus sanguinolentus	PSFOR855-13	Ampedus nigerrimus	10.2280035
Ampedus	PSFOR839-13	Ampedus sanguinolentus	PSFOR338-13	Ampedus nigerrimus	10.046846
Ampedus	PSFOR839-13	Ampedus sanguinolentus	PSFOR851-13	Ampedus nigerrimus	10.046846
Ampedus	PSFOR839-13	Ampedus sanguinolentus	PSFOR738-13	Ampedus nigrinus	14.282121
Ampedus	PSFOR839-13	Ampedus sanguinolentus	PSFOR959-14	Ampedus nigrinus	14.074895
Ampedus	PSFOR839-13	Ampedus sanguinolentus	PSFOR837-13	Ampedus pomonae	1.8560144
Ampedus	PSFOR839-13	Ampedus sanguinolentus	PSFOR550-13	Ampedus pomorum	13.549088
Ampedus	PSFOR839-13	Ampedus sanguinolentus	PSFOR529-13	Ampedus pomorum	11.340248
Ampedus	PSFOR839-13	Ampedus sanguinolentus	PSFOR532-13	Ampedus pomorum	11.190161
Ampedus	PSFOR839-13	Ampedus sanguinolentus	PSFOR530-13	Ampedus pomorum	13.549088
Ampedus	PSFOR839-13	Ampedus sanguinolentus	PSFOR546-13	Ampedus pomorum	11.340248
Ampedus	PSFOR839-13	Ampedus sanguinolentus	PSFOR547-13	Ampedus pomorum	11.340248
Ampedus	PSFOR839-13	Ampedus sanguinolentus	PSFOR548-13	Ampedus pomorum	11.340248
Ampedus	PSFOR839-13	Ampedus sanguinolentus	PSFOR544-13	Ampedus pomorum	10.671409
Ampedus	PSFOR839-13	Ampedus sanguinolentus	PSFOR735-13	Ampedus praestus	12.405597
Ampedus	PSFOR839-13	Ampedus sanguinolentus	PSFOR848-13	Ampedus praestus	12.594275
Ampedus	PSFOR839-13	Ampedus sanguinolentus	PSFOR842-13	Ampedus quercicola	10.652353
Ampedus	PSFOR839-13	Ampedus sanguinolentus	PSFOR549-13	Ampedus quercicola	10.267621
Ampedus	PSFOR839-13	Ampedus sanguinolentus	PSFOR1002-14	Ampedus quercicola	10.650498
Ampedus	PSFOR839-13	Ampedus sanguinolentus	PSFOR539-13	Ampedus quercicola	10.6674385
Ampedus	PSFOR839-13	Ampedus sanguinolentus	PSFOR1004-14	Ampedus quercicola	10.8190975
Ampedus	PSFOR839-13	Ampedus sanguinolentus	PSFOR540-13	Ampedus quercicola	10.634595
Ampedus	PSFOR839-13	Ampedus sanguinolentus	PSFOR843-13	Ampedus quercicola	9.463172
Ampedus	PSFOR839-13	Ampedus sanguinolentus	PSFOR541-13	Ampedus quercicola	10.634595
Ampedus	PSFOR839-13	Ampedus sanguinolentus	PSFOR538-13	Ampedus quercicola	10.335949
Ampedus	PSFOR839-13	Ampedus sanguinolentus	PSFOR1006-14	Ampedus quercicola	10.8190975
Ampedus	PSFOR839-13	Ampedus sanguinolentus	PSFOR1005-14	Ampedus quercicola	10.8190975
Ampedus	PSFOR839-13	Ampedus sanguinolentus	PSFOR841-13	Ampedus quercicola	10.013163
Ampedus	PSFOR839-13	Ampedus sanguinolentus	PSFOR937-14	Ampedus quercicola	9.25472
Ampedus	PSFOR839-13	Ampedus sanguinolentus	PSFOR840-13	Ampedus rufipennis	9.221139
Ampedus	PSFOR839-13	Ampedus sanguinolentus	PSFOR962-14	Ampedus rufipennis	9.221139
Ampedus	PSFOR839-13	Ampedus sanguinolentus	PSFOR832-13	Ampedus rufipennis	8.556495
Ampedus	PSFOR839-13	Ampedus sanguinolentus	PSFOR339-13	Ampedus rufipennis	7.4978137
Ampedus	PSFOR839-13	Ampedus sanguinolentus	PSFOR941-14	Ampedus rufipennis	9.401647
Ampedus	PSFOR839-13	Ampedus sanguinolentus	PSFOR833-13	Ampedus rufipennis	9.221139
Ampedus	PSFOR839-13	Ampedus sanguinolentus	PSFOR1057-14	Ampedus sanguineus	12.305779
Ampedus	PSFOR839-13	Ampedus sanguinolentus	PSFOR844-13	Ampedus sanguineus	12.864373
Ampedus	PSFOR839-13	Ampedus sanguinolentus	PSFOR1003-14	Ampedus sanguineus	12.305779
Ampedus	PSFOR839-13	Ampedus sanguinolentus	PSFOR845-13	Ampedus sanguineus	12.305779
Ampedus	PSFOR507-13	Ampedus scrofa	PSFOR721-13	Ampedus aurilegulus	13.147145
Ampedus	PSFOR507-13	Ampedus scrofa	PSFOR852-13	Ampedus aurilegulus	13.29601
Ampedus	PSFOR507-13	Ampedus scrofa	PSFOR722-13	Ampedus balteatus	6.754242
Ampedus	PSFOR507-13	Ampedus scrofa	PSFOR957-14	Ampedus balteatus	6.5780535
Ampedus	PSFOR507-13	Ampedus scrofa	PSFOR838-13	Ampedus balteatus	6.798018
Ampedus	PSFOR507-13	Ampedus scrofa	PSFOR1056-14	Ampedus balteatus	7.604171
Ampedus	PSFOR507-13	Ampedus scrofa	PSFOR834-13	Ampedus brunnicornis	6.6231923
Ampedus	PSFOR507-13	Ampedus scrofa	PSFOR737-13	Ampedus brunnicornis	6.6231923
Ampedus	PSFOR507-13	Ampedus scrofa	PSFOR723-13	Ampedus cardinalis	3.7857335
Ampedus	PSFOR507-13	Ampedus scrofa	PSFOR847-13	Ampedus cardinalis	3.95432
Ampedus	PSFOR507-13	Ampedus scrofa	PSFOR734-13	Ampedus cinnabarinus	12.373493
Ampedus	PSFOR507-13	Ampedus scrofa	PSFOR827-13	Ampedus elongatulus	12.594275
Ampedus	PSFOR507-13	Ampedus scrofa	PSFOR933-14	Ampedus elongatulus	12.492451
Ampedus	PSFOR507-13	Ampedus scrofa	PSFOR543-13	Ampedus elongatulus	14.4032
Ampedus	PSFOR507-13	Ampedus scrofa	PSFOR854-13	Ampedus erythrogonus	15.296234
Ampedus	PSFOR507-13	Ampedus scrofa	PSFOR853-13	Ampedus erythrogonus	14.700219
Ampedus	PSFOR507-13	Ampedus scrofa	PSFOR726-13	Ampedus erythrogonus	15.306154
Ampedus	PSFOR507-13	Ampedus scrofa	PSFOR936-14	Ampedus melonii	3.6264513
Ampedus	PSFOR507-13	Ampedus scrofa	PSFOR932-14	Ampedus nemoralis	12.594275
Ampedus	PSFOR507-13	Ampedus scrofa	PSFOR528-13	Ampedus nemoralis	12.447483
Ampedus	PSFOR507-13	Ampedus scrofa	PSFOR542-13	Ampedus nemoralis	12.405597
Ampedus	PSFOR507-13	Ampedus scrofa	PSFOR828-13	Ampedus nigerrimus	12.1771345
Ampedus	PSFOR507-13	Ampedus scrofa	PSFOR855-13	Ampedus nigerrimus	12.373493
Ampedus	PSFOR507-13	Ampedus scrofa	PSFOR338-13	Ampedus nigerrimus	12.186576
Ampedus	PSFOR507-13	Ampedus scrofa	PSFOR851-13	Ampedus nigerrimus	12.186576
Ampedus	PSFOR507-13	Ampedus scrofa	PSFOR738-13	Ampedus nigrinus	12.571706
Ampedus	PSFOR507-13	Ampedus scrofa	PSFOR959-14	Ampedus nigrinus	12.561111
Ampedus	PSFOR507-13	Ampedus scrofa	PSFOR837-13	Ampedus pomonae	13.027528
Ampedus	PSFOR507-13	Ampedus scrofa	PSFOR550-13	Ampedus pomorum	14.065506
Ampedus	PSFOR507-13	Ampedus scrofa	PSFOR529-13	Ampedus pomorum	12.405597
Ampedus	PSFOR507-13	Ampedus scrofa	PSFOR532-13	Ampedus pomorum	12.252727
Ampedus	PSFOR507-13	Ampedus scrofa	PSFOR530-13	Ampedus pomorum	14.065506
Ampedus	PSFOR507-13	Ampedus scrofa	PSFOR546-13	Ampedus pomorum	12.7836685
Ampedus	PSFOR507-13	Ampedus scrofa	PSFOR547-13	Ampedus pomorum	12.405597
Ampedus	PSFOR507-13	Ampedus scrofa	PSFOR548-13	Ampedus pomorum	12.405597
Ampedus	PSFOR507-13	Ampedus scrofa	PSFOR544-13	Ampedus pomorum	12.743153
Ampedus	PSFOR507-13	Ampedus scrofa	PSFOR735-13	Ampedus praestus	3.6264513
Ampedus	PSFOR507-13	Ampedus scrofa	PSFOR848-13	Ampedus praestus	3.463318
Ampedus	PSFOR507-13	Ampedus scrofa	PSFOR842-13	Ampedus quercicola	13.318512
Ampedus	PSFOR507-13	Ampedus scrofa	PSFOR549-13	Ampedus quercicola	13.08614
Ampedus	PSFOR507-13	Ampedus scrofa	PSFOR1002-14	Ampedus quercicola	12.62069
Ampedus	PSFOR507-13	Ampedus scrofa	PSFOR539-13	Ampedus quercicola	12.955104
Ampedus	PSFOR507-13	Ampedus scrofa	PSFOR1004-14	Ampedus quercicola	13.106254
Ampedus	PSFOR507-13	Ampedus scrofa	PSFOR540-13	Ampedus quercicola	13.29601
Ampedus	PSFOR507-13	Ampedus scrofa	PSFOR843-13	Ampedus quercicola	12.7969475
Ampedus	PSFOR507-13	Ampedus scrofa	PSFOR541-13	Ampedus quercicola	13.29601
Ampedus	PSFOR507-13	Ampedus scrofa	PSFOR538-13	Ampedus quercicola	12.853159
Ampedus	PSFOR507-13	Ampedus scrofa	PSFOR1006-14	Ampedus quercicola	13.4864855
Ampedus	PSFOR507-13	Ampedus scrofa	PSFOR1005-14	Ampedus quercicola	13.106254
Ampedus	PSFOR507-13	Ampedus scrofa	PSFOR841-13	Ampedus quercicola	12.848784
Ampedus	PSFOR507-13	Ampedus scrofa	PSFOR937-14	Ampedus quercicola	13.006123
Ampedus	PSFOR507-13	Ampedus scrofa	PSFOR840-13	Ampedus rufipennis	11.876785
Ampedus	PSFOR507-13	Ampedus scrofa	PSFOR962-14	Ampedus rufipennis	11.876785
Ampedus	PSFOR507-13	Ampedus scrofa	PSFOR832-13	Ampedus rufipennis	12.6347275
Ampedus	PSFOR507-13	Ampedus scrofa	PSFOR339-13	Ampedus rufipennis	12.300381
Ampedus	PSFOR507-13	Ampedus scrofa	PSFOR941-14	Ampedus rufipennis	12.0644045
Ampedus	PSFOR507-13	Ampedus scrofa	PSFOR833-13	Ampedus rufipennis	11.876785
Ampedus	PSFOR507-13	Ampedus scrofa	PSFOR1057-14	Ampedus sanguineus	13.497965
Ampedus	PSFOR507-13	Ampedus scrofa	PSFOR844-13	Ampedus sanguineus	14.062306
Ampedus	PSFOR507-13	Ampedus scrofa	PSFOR1003-14	Ampedus sanguineus	13.497965
Ampedus	PSFOR507-13	Ampedus scrofa	PSFOR845-13	Ampedus sanguineus	13.497965
Ampedus	PSFOR507-13	Ampedus scrofa	PSFOR839-13	Ampedus sanguinolentus	12.618649
Ampedus	PSFOR521-13	Ampedus scrofa	PSFOR721-13	Ampedus aurilegulus	13.147145
Ampedus	PSFOR521-13	Ampedus scrofa	PSFOR852-13	Ampedus aurilegulus	13.677688
Ampedus	PSFOR521-13	Ampedus scrofa	PSFOR722-13	Ampedus balteatus	7.0860295
Ampedus	PSFOR521-13	Ampedus scrofa	PSFOR957-14	Ampedus balteatus	6.90947
Ampedus	PSFOR521-13	Ampedus scrofa	PSFOR838-13	Ampedus balteatus	7.1320252
Ampedus	PSFOR521-13	Ampedus scrofa	PSFOR1056-14	Ampedus balteatus	7.93937
Ampedus	PSFOR521-13	Ampedus scrofa	PSFOR834-13	Ampedus brunnicornis	7.300353
Ampedus	PSFOR521-13	Ampedus scrofa	PSFOR737-13	Ampedus brunnicornis	7.300353
Ampedus	PSFOR521-13	Ampedus scrofa	PSFOR723-13	Ampedus cardinalis	3.9414973
Ampedus	PSFOR521-13	Ampedus scrofa	PSFOR847-13	Ampedus cardinalis	4.1095977
Ampedus	PSFOR521-13	Ampedus scrofa	PSFOR734-13	Ampedus cinnabarinus	12.561111
Ampedus	PSFOR521-13	Ampedus scrofa	PSFOR827-13	Ampedus elongatulus	12.949785
Ampedus	PSFOR521-13	Ampedus scrofa	PSFOR933-14	Ampedus elongatulus	12.848764
Ampedus	PSFOR521-13	Ampedus scrofa	PSFOR543-13	Ampedus elongatulus	14.359969
Ampedus	PSFOR521-13	Ampedus scrofa	PSFOR854-13	Ampedus erythrogonus	15.666223
Ampedus	PSFOR521-13	Ampedus scrofa	PSFOR853-13	Ampedus erythrogonus	14.888543
Ampedus	PSFOR521-13	Ampedus scrofa	PSFOR726-13	Ampedus erythrogonus	15.675915
Ampedus	PSFOR521-13	Ampedus scrofa	PSFOR936-14	Ampedus melonii	3.7817285
Ampedus	PSFOR521-13	Ampedus scrofa	PSFOR932-14	Ampedus nemoralis	12.949785
Ampedus	PSFOR521-13	Ampedus scrofa	PSFOR528-13	Ampedus nemoralis	12.803546
Ampedus	PSFOR521-13	Ampedus scrofa	PSFOR542-13	Ampedus nemoralis	12.760387
Ampedus	PSFOR521-13	Ampedus scrofa	PSFOR828-13	Ampedus nigerrimus	12.532048
Ampedus	PSFOR521-13	Ampedus scrofa	PSFOR855-13	Ampedus nigerrimus	12.728897
Ampedus	PSFOR521-13	Ampedus scrofa	PSFOR338-13	Ampedus nigerrimus	12.541276
Ampedus	PSFOR521-13	Ampedus scrofa	PSFOR851-13	Ampedus nigerrimus	12.541276
Ampedus	PSFOR521-13	Ampedus scrofa	PSFOR738-13	Ampedus nigrinus	12.927611
Ampedus	PSFOR521-13	Ampedus scrofa	PSFOR959-14	Ampedus nigrinus	12.917219
Ampedus	PSFOR521-13	Ampedus scrofa	PSFOR837-13	Ampedus pomonae	13.235858
Ampedus	PSFOR521-13	Ampedus scrofa	PSFOR550-13	Ampedus pomorum	14.026751
Ampedus	PSFOR521-13	Ampedus scrofa	PSFOR529-13	Ampedus pomorum	12.760387
Ampedus	PSFOR521-13	Ampedus scrofa	PSFOR532-13	Ampedus pomorum	12.606237
Ampedus	PSFOR521-13	Ampedus scrofa	PSFOR530-13	Ampedus pomorum	14.026751
Ampedus	PSFOR521-13	Ampedus scrofa	PSFOR546-13	Ampedus pomorum	13.139897
Ampedus	PSFOR521-13	Ampedus scrofa	PSFOR547-13	Ampedus pomorum	12.760387
Ampedus	PSFOR521-13	Ampedus scrofa	PSFOR548-13	Ampedus pomorum	12.760387
Ampedus	PSFOR521-13	Ampedus scrofa	PSFOR544-13	Ampedus pomorum	13.112804
Ampedus	PSFOR521-13	Ampedus scrofa	PSFOR735-13	Ampedus praestus	3.7817285
Ampedus	PSFOR521-13	Ampedus scrofa	PSFOR848-13	Ampedus praestus	3.6185946
Ampedus	PSFOR521-13	Ampedus scrofa	PSFOR842-13	Ampedus quercicola	13.50935
Ampedus	PSFOR521-13	Ampedus scrofa	PSFOR549-13	Ampedus quercicola	13.275173
Ampedus	PSFOR521-13	Ampedus scrofa	PSFOR1002-14	Ampedus quercicola	12.814866
Ampedus	PSFOR521-13	Ampedus scrofa	PSFOR539-13	Ampedus quercicola	12.647411
Ampedus	PSFOR521-13	Ampedus scrofa	PSFOR1004-14	Ampedus quercicola	13.29601
Ampedus	PSFOR521-13	Ampedus scrofa	PSFOR540-13	Ampedus quercicola	13.4864855
Ampedus	PSFOR521-13	Ampedus scrofa	PSFOR843-13	Ampedus quercicola	13.0057125
Ampedus	PSFOR521-13	Ampedus scrofa	PSFOR541-13	Ampedus quercicola	13.4864855
Ampedus	PSFOR521-13	Ampedus scrofa	PSFOR538-13	Ampedus quercicola	13.046209
Ampedus	PSFOR521-13	Ampedus scrofa	PSFOR1006-14	Ampedus quercicola	13.677688
Ampedus	PSFOR521-13	Ampedus scrofa	PSFOR1005-14	Ampedus quercicola	13.29601
Ampedus	PSFOR521-13	Ampedus scrofa	PSFOR841-13	Ampedus quercicola	12.848784
Ampedus	PSFOR521-13	Ampedus scrofa	PSFOR937-14	Ampedus quercicola	13.006123
Ampedus	PSFOR521-13	Ampedus scrofa	PSFOR840-13	Ampedus rufipennis	12.0644045
Ampedus	PSFOR521-13	Ampedus scrofa	PSFOR962-14	Ampedus rufipennis	12.0644045
Ampedus	PSFOR521-13	Ampedus scrofa	PSFOR832-13	Ampedus rufipennis	12.6347275
Ampedus	PSFOR521-13	Ampedus scrofa	PSFOR339-13	Ampedus rufipennis	12.000979
Ampedus	PSFOR521-13	Ampedus scrofa	PSFOR941-14	Ampedus rufipennis	12.252727
Ampedus	PSFOR521-13	Ampedus scrofa	PSFOR833-13	Ampedus rufipennis	12.0644045
Ampedus	PSFOR521-13	Ampedus scrofa	PSFOR1057-14	Ampedus sanguineus	13.881843
Ampedus	PSFOR521-13	Ampedus scrofa	PSFOR844-13	Ampedus sanguineus	14.449906
Ampedus	PSFOR521-13	Ampedus scrofa	PSFOR1003-14	Ampedus sanguineus	13.881843
Ampedus	PSFOR521-13	Ampedus scrofa	PSFOR845-13	Ampedus sanguineus	13.881843
Ampedus	PSFOR521-13	Ampedus scrofa	PSFOR839-13	Ampedus sanguinolentus	12.808763
Ampedus	PSFOR819-13	Ampedus scrofa	PSFOR721-13	Ampedus aurilegulus	12.774779
Ampedus	PSFOR819-13	Ampedus scrofa	PSFOR852-13	Ampedus aurilegulus	13.128224
Ampedus	PSFOR819-13	Ampedus scrofa	PSFOR722-13	Ampedus balteatus	6.754242
Ampedus	PSFOR819-13	Ampedus scrofa	PSFOR957-14	Ampedus balteatus	6.5780535
Ampedus	PSFOR819-13	Ampedus scrofa	PSFOR838-13	Ampedus balteatus	6.798018
Ampedus	PSFOR819-13	Ampedus scrofa	PSFOR1056-14	Ampedus balteatus	7.604171
Ampedus	PSFOR819-13	Ampedus scrofa	PSFOR834-13	Ampedus brunnicornis	6.7959013
Ampedus	PSFOR819-13	Ampedus scrofa	PSFOR737-13	Ampedus brunnicornis	6.7959013
Ampedus	PSFOR819-13	Ampedus scrofa	PSFOR723-13	Ampedus cardinalis	3.4594696
Ampedus	PSFOR819-13	Ampedus scrofa	PSFOR847-13	Ampedus cardinalis	3.6264513
Ampedus	PSFOR819-13	Ampedus scrofa	PSFOR734-13	Ampedus cinnabarinus	12.206821
Ampedus	PSFOR819-13	Ampedus scrofa	PSFOR827-13	Ampedus elongatulus	12.217623
Ampedus	PSFOR819-13	Ampedus scrofa	PSFOR933-14	Ampedus elongatulus	12.113661
Ampedus	PSFOR819-13	Ampedus scrofa	PSFOR543-13	Ampedus elongatulus	13.793762
Ampedus	PSFOR819-13	Ampedus scrofa	PSFOR854-13	Ampedus erythrogonus	15.861538
Ampedus	PSFOR819-13	Ampedus scrofa	PSFOR853-13	Ampedus erythrogonus	15.098187
Ampedus	PSFOR819-13	Ampedus scrofa	PSFOR726-13	Ampedus erythrogonus	15.871607
Ampedus	PSFOR819-13	Ampedus scrofa	PSFOR936-14	Ampedus melonii	2.9843159
Ampedus	PSFOR819-13	Ampedus scrofa	PSFOR932-14	Ampedus nemoralis	12.594275
Ampedus	PSFOR819-13	Ampedus scrofa	PSFOR528-13	Ampedus nemoralis	12.447483
Ampedus	PSFOR819-13	Ampedus scrofa	PSFOR542-13	Ampedus nemoralis	12.405597
Ampedus	PSFOR819-13	Ampedus scrofa	PSFOR828-13	Ampedus nigerrimus	12.532048
Ampedus	PSFOR819-13	Ampedus scrofa	PSFOR855-13	Ampedus nigerrimus	12.728897
Ampedus	PSFOR819-13	Ampedus scrofa	PSFOR338-13	Ampedus nigerrimus	12.541276
Ampedus	PSFOR819-13	Ampedus scrofa	PSFOR851-13	Ampedus nigerrimus	12.541276
Ampedus	PSFOR819-13	Ampedus scrofa	PSFOR738-13	Ampedus nigrinus	12.7389345
Ampedus	PSFOR819-13	Ampedus scrofa	PSFOR959-14	Ampedus nigrinus	12.728897
Ampedus	PSFOR819-13	Ampedus scrofa	PSFOR837-13	Ampedus pomonae	13.415069
Ampedus	PSFOR819-13	Ampedus scrofa	PSFOR550-13	Ampedus pomorum	13.459776
Ampedus	PSFOR819-13	Ampedus scrofa	PSFOR529-13	Ampedus pomorum	12.405597
Ampedus	PSFOR819-13	Ampedus scrofa	PSFOR532-13	Ampedus pomorum	11.876785
Ampedus	PSFOR819-13	Ampedus scrofa	PSFOR530-13	Ampedus pomorum	13.459776
Ampedus	PSFOR819-13	Ampedus scrofa	PSFOR546-13	Ampedus pomorum	12.7836685
Ampedus	PSFOR819-13	Ampedus scrofa	PSFOR547-13	Ampedus pomorum	12.405597
Ampedus	PSFOR819-13	Ampedus scrofa	PSFOR548-13	Ampedus pomorum	12.405597
Ampedus	PSFOR819-13	Ampedus scrofa	PSFOR544-13	Ampedus pomorum	12.940392
Ampedus	PSFOR819-13	Ampedus scrofa	PSFOR735-13	Ampedus praestus	2.9843159
Ampedus	PSFOR819-13	Ampedus scrofa	PSFOR848-13	Ampedus praestus	2.8227692
Ampedus	PSFOR819-13	Ampedus scrofa	PSFOR842-13	Ampedus quercicola	12.939003
Ampedus	PSFOR819-13	Ampedus scrofa	PSFOR549-13	Ampedus quercicola	12.897814
Ampedus	PSFOR819-13	Ampedus scrofa	PSFOR1002-14	Ampedus quercicola	12.427265
Ampedus	PSFOR819-13	Ampedus scrofa	PSFOR539-13	Ampedus quercicola	12.35382
Ampedus	PSFOR819-13	Ampedus scrofa	PSFOR1004-14	Ampedus quercicola	12.728897
Ampedus	PSFOR819-13	Ampedus scrofa	PSFOR540-13	Ampedus quercicola	12.917219
Ampedus	PSFOR819-13	Ampedus scrofa	PSFOR843-13	Ampedus quercicola	12.5890465
Ampedus	PSFOR819-13	Ampedus scrofa	PSFOR541-13	Ampedus quercicola	12.917219
Ampedus	PSFOR819-13	Ampedus scrofa	PSFOR538-13	Ampedus quercicola	12.469281
Ampedus	PSFOR819-13	Ampedus scrofa	PSFOR1006-14	Ampedus quercicola	13.106254
Ampedus	PSFOR819-13	Ampedus scrofa	PSFOR1005-14	Ampedus quercicola	12.728897
Ampedus	PSFOR819-13	Ampedus scrofa	PSFOR841-13	Ampedus quercicola	12.470711
Ampedus	PSFOR819-13	Ampedus scrofa	PSFOR937-14	Ampedus quercicola	12.512292
Ampedus	PSFOR819-13	Ampedus scrofa	PSFOR840-13	Ampedus rufipennis	11.876785
Ampedus	PSFOR819-13	Ampedus scrofa	PSFOR962-14	Ampedus rufipennis	11.876785
Ampedus	PSFOR819-13	Ampedus scrofa	PSFOR832-13	Ampedus rufipennis	12.419211
Ampedus	PSFOR819-13	Ampedus scrofa	PSFOR339-13	Ampedus rufipennis	12.019221
Ampedus	PSFOR819-13	Ampedus scrofa	PSFOR941-14	Ampedus rufipennis	12.0644045
Ampedus	PSFOR819-13	Ampedus scrofa	PSFOR833-13	Ampedus rufipennis	11.876785
Ampedus	PSFOR819-13	Ampedus scrofa	PSFOR1057-14	Ampedus sanguineus	13.330735
Ampedus	PSFOR819-13	Ampedus scrofa	PSFOR844-13	Ampedus sanguineus	13.894524
Ampedus	PSFOR819-13	Ampedus scrofa	PSFOR1003-14	Ampedus sanguineus	13.330735
Ampedus	PSFOR819-13	Ampedus scrofa	PSFOR845-13	Ampedus sanguineus	13.330735
Ampedus	PSFOR819-13	Ampedus scrofa	PSFOR839-13	Ampedus sanguinolentus	13.164624
Ampedus	PSFOR516-13	Ampedus scrofa	PSFOR721-13	Ampedus aurilegulus	14.952675
Ampedus	PSFOR516-13	Ampedus scrofa	PSFOR852-13	Ampedus aurilegulus	15.591663
Ampedus	PSFOR516-13	Ampedus scrofa	PSFOR722-13	Ampedus balteatus	9.329469
Ampedus	PSFOR516-13	Ampedus scrofa	PSFOR957-14	Ampedus balteatus	9.027941
Ampedus	PSFOR516-13	Ampedus scrofa	PSFOR838-13	Ampedus balteatus	9.40483
Ampedus	PSFOR516-13	Ampedus scrofa	PSFOR1056-14	Ampedus balteatus	10.475215
Ampedus	PSFOR516-13	Ampedus scrofa	PSFOR834-13	Ampedus brunnicornis	7.398677
Ampedus	PSFOR516-13	Ampedus scrofa	PSFOR737-13	Ampedus brunnicornis	7.398677
Ampedus	PSFOR516-13	Ampedus scrofa	PSFOR723-13	Ampedus cardinalis	5.7225423
Ampedus	PSFOR516-13	Ampedus scrofa	PSFOR847-13	Ampedus cardinalis	5.732217
Ampedus	PSFOR516-13	Ampedus scrofa	PSFOR734-13	Ampedus cinnabarinus	13.390046
Ampedus	PSFOR516-13	Ampedus scrofa	PSFOR827-13	Ampedus elongatulus	14.026751
Ampedus	PSFOR516-13	Ampedus scrofa	PSFOR933-14	Ampedus elongatulus	14.123647
Ampedus	PSFOR516-13	Ampedus scrofa	PSFOR543-13	Ampedus elongatulus	14.676428
Ampedus	PSFOR516-13	Ampedus scrofa	PSFOR854-13	Ampedus erythrogonus	16.439203
Ampedus	PSFOR516-13	Ampedus scrofa	PSFOR853-13	Ampedus erythrogonus	16.439203
Ampedus	PSFOR516-13	Ampedus scrofa	PSFOR726-13	Ampedus erythrogonus	16.456963
Ampedus	PSFOR516-13	Ampedus scrofa	PSFOR936-14	Ampedus melonii	4.912527
Ampedus	PSFOR516-13	Ampedus scrofa	PSFOR932-14	Ampedus nemoralis	14.340234
Ampedus	PSFOR516-13	Ampedus scrofa	PSFOR528-13	Ampedus nemoralis	14.340234
Ampedus	PSFOR516-13	Ampedus scrofa	PSFOR542-13	Ampedus nemoralis	14.340234
Ampedus	PSFOR516-13	Ampedus scrofa	PSFOR828-13	Ampedus nigerrimus	14.2605095
Ampedus	PSFOR516-13	Ampedus scrofa	PSFOR855-13	Ampedus nigerrimus	14.585436
Ampedus	PSFOR516-13	Ampedus scrofa	PSFOR338-13	Ampedus nigerrimus	14.273904
Ampedus	PSFOR516-13	Ampedus scrofa	PSFOR851-13	Ampedus nigerrimus	14.273904
Ampedus	PSFOR516-13	Ampedus scrofa	PSFOR738-13	Ampedus nigrinus	14.026751
Ampedus	PSFOR516-13	Ampedus scrofa	PSFOR959-14	Ampedus nigrinus	14.321752
Ampedus	PSFOR516-13	Ampedus scrofa	PSFOR837-13	Ampedus pomonae	16.06168
Ampedus	PSFOR516-13	Ampedus scrofa	PSFOR550-13	Ampedus pomorum	14.340234
Ampedus	PSFOR516-13	Ampedus scrofa	PSFOR529-13	Ampedus pomorum	14.340234
Ampedus	PSFOR516-13	Ampedus scrofa	PSFOR532-13	Ampedus pomorum	13.752027
Ampedus	PSFOR516-13	Ampedus scrofa	PSFOR530-13	Ampedus pomorum	14.340234
Ampedus	PSFOR516-13	Ampedus scrofa	PSFOR546-13	Ampedus pomorum	14.973152
Ampedus	PSFOR516-13	Ampedus scrofa	PSFOR547-13	Ampedus pomorum	14.340234
Ampedus	PSFOR516-13	Ampedus scrofa	PSFOR548-13	Ampedus pomorum	14.340234
Ampedus	PSFOR516-13	Ampedus scrofa	PSFOR544-13	Ampedus pomorum	15.044655
Ampedus	PSFOR516-13	Ampedus scrofa	PSFOR735-13	Ampedus praestus	4.912527
Ampedus	PSFOR516-13	Ampedus scrofa	PSFOR848-13	Ampedus praestus	4.642259
Ampedus	PSFOR516-13	Ampedus scrofa	PSFOR842-13	Ampedus quercicola	14.031659
Ampedus	PSFOR516-13	Ampedus scrofa	PSFOR549-13	Ampedus quercicola	13.964311
Ampedus	PSFOR516-13	Ampedus scrofa	PSFOR1002-14	Ampedus quercicola	12.909791
Ampedus	PSFOR516-13	Ampedus scrofa	PSFOR539-13	Ampedus quercicola	12.955104
Ampedus	PSFOR516-13	Ampedus scrofa	PSFOR1004-14	Ampedus quercicola	13.683406
Ampedus	PSFOR516-13	Ampedus scrofa	PSFOR540-13	Ampedus quercicola	13.993006
Ampedus	PSFOR516-13	Ampedus scrofa	PSFOR843-13	Ampedus quercicola	13.252211
Ampedus	PSFOR516-13	Ampedus scrofa	PSFOR541-13	Ampedus quercicola	13.993006
Ampedus	PSFOR516-13	Ampedus scrofa	PSFOR538-13	Ampedus quercicola	13.285801
Ampedus	PSFOR516-13	Ampedus scrofa	PSFOR1006-14	Ampedus quercicola	13.993006
Ampedus	PSFOR516-13	Ampedus scrofa	PSFOR1005-14	Ampedus quercicola	13.683406
Ampedus	PSFOR516-13	Ampedus scrofa	PSFOR841-13	Ampedus quercicola	13.964311
Ampedus	PSFOR516-13	Ampedus scrofa	PSFOR937-14	Ampedus quercicola	13.4115305
Ampedus	PSFOR516-13	Ampedus scrofa	PSFOR840-13	Ampedus rufipennis	12.859156
Ampedus	PSFOR516-13	Ampedus scrofa	PSFOR962-14	Ampedus rufipennis	12.859156
Ampedus	PSFOR516-13	Ampedus scrofa	PSFOR832-13	Ampedus rufipennis	13.205135
Ampedus	PSFOR516-13	Ampedus scrofa	PSFOR339-13	Ampedus rufipennis	13.498168
Ampedus	PSFOR516-13	Ampedus scrofa	PSFOR941-14	Ampedus rufipennis	13.168756
Ampedus	PSFOR516-13	Ampedus scrofa	PSFOR833-13	Ampedus rufipennis	12.859156
Ampedus	PSFOR516-13	Ampedus scrofa	PSFOR1057-14	Ampedus sanguineus	15.614183
Ampedus	PSFOR516-13	Ampedus scrofa	PSFOR844-13	Ampedus sanguineus	16.263544
Ampedus	PSFOR516-13	Ampedus scrofa	PSFOR1003-14	Ampedus sanguineus	15.614183
Ampedus	PSFOR516-13	Ampedus scrofa	PSFOR845-13	Ampedus sanguineus	15.614183
Ampedus	PSFOR516-13	Ampedus scrofa	PSFOR839-13	Ampedus sanguinolentus	16.345192
Ampedus	PSFOR518-13	Ampedus scrofa	PSFOR721-13	Ampedus aurilegulus	13.365203
Ampedus	PSFOR518-13	Ampedus scrofa	PSFOR852-13	Ampedus aurilegulus	13.578421
Ampedus	PSFOR518-13	Ampedus scrofa	PSFOR722-13	Ampedus balteatus	6.6425657
Ampedus	PSFOR518-13	Ampedus scrofa	PSFOR957-14	Ampedus balteatus	6.452089
Ampedus	PSFOR518-13	Ampedus scrofa	PSFOR838-13	Ampedus balteatus	6.6906652
Ampedus	PSFOR518-13	Ampedus scrofa	PSFOR1056-14	Ampedus balteatus	7.591347
Ampedus	PSFOR518-13	Ampedus scrofa	PSFOR834-13	Ampedus brunnicornis	6.1196747
[truncated: 1,146 more rows]
