# Supplementary material for: PASSIFOR: A reference library of DNA barcodes for French saproxylic beetles (Insecta, Coleoptera)
Source: Biodivers Data J. 2015 Mar 4;(3):e4078. doi: 10.3897/BDJ.3.e4078 (PMC4355675; doi:10.3897/BDJ.3.e4078)
Supplement: Supplementary material 6 — Intra-specific distances and distances to nearest neighbor (NN) [file biodiversity_data_journal-3-e4078-s006.xlsx]

## Sheet: Feuil1
Family	Species	Mean Intra-sp	Max Intra-sp	Nearest Neighbor	Nearest Species	Distance to NN
Anthribidae	Allandrus therondi	N/A	N/A	PSFOR085-13	Rhamnusium bicolor	21.37
Anthribidae	Anthribus fasciatus	N/A	N/A	PSFOR182-13	Rhaphitropis oxyacanthae	18.13
Anthribidae	Choragus sheppardi	N/A	N/A	PSFOR626-13	Opilo pallidus	17.94
Anthribidae	Dissoleucas niveirostris	N/A	N/A	PSFOR884-14	Rhagium mordax	17.52
Anthribidae	Enedreytes sepicola	N/A	N/A	PSFOR188-13	Mycetophagus multipunctatus	19.04
Anthribidae	Platyrhinus resinosus	N/A	N/A	PSFOR143-13	Pedostrangalia pubescens	17.55
Anthribidae	Platystomos albinus	0	0	PSFOR357-13	Mycetophagus piceus	19.49
Anthribidae	Rhaphitropis oxyacanthae	N/A	N/A	PSFOR189-13	Triphyllus bicolor	16.76
Anthribidae	Tropideres albirostris	N/A	N/A	PSFOR102-13	Anastrangalia dubia	17.86
Biphyllidae	Biphyllus lunatus	1.86	1.86	PSFOR457-13	Litargus connexus	13.83
Bostrichidae	Scobicia pustulata	N/A	N/A	PSFOR383-13	Ptilinus pectinicornis	20.7
Buprestidae	Agrilus biguttatus	N/A	N/A	PSFOR626-13	Opilo pallidus	19.26
Buprestidae	Anthaxia umbellatarum	N/A	N/A	PSFOR791-13	Colydium elongatum	17.34
Buprestidae	Buprestis octoguttata	N/A	N/A	PSFOR583-13	Buprestis rustica	15.57
Buprestidae	Buprestis rustica	N/A	N/A	PSFOR582-13	Buprestis octoguttata	15.57
Buprestidae	Chrysobothris affinis	N/A	N/A	PSFOR370-13	Tillus elongatus	14.34
Buprestidae	Latipalpis plana	N/A	N/A	PSFOR584-13	Chrysobothris affinis	18.23
Buprestidae	Phaenops formaneki	N/A	N/A	PSFOR584-13	Chrysobothris affinis	16.67
Cerambycidae	Acanthocinus aedilis	N/A	N/A	PSFOR030-13	Acanthocinus reticulatus	10.35
Cerambycidae	Acanthocinus reticulatus	N/A	N/A	PSFOR029-13	Acanthocinus aedilis	10.35
Cerambycidae	Acmaeops marginatus	N/A	N/A	PSFOR050-13	Dinoptera collaris	10.14
Cerambycidae	Aegosoma scabricorne	N/A	N/A	PSFOR225-13	Stenomax foudrasi	17.71
Cerambycidae	Alosterna tabacicolor	13	13	PSFOR430-13	Anoplodera sexguttata	16.74
Cerambycidae	Anaesthetis testacea	N/A	N/A	PSFOR122-13	Exocentrus adspersus	13.63
Cerambycidae	Anaglyptus mysticus	0.06	0.15	PSFOR119-13	Clytus rhamni	16.01
Cerambycidae	Anastrangalia dubia	0.05	0.15	PSFOR810-13	Anastrangalia reyi	0.32
Cerambycidae	Anastrangalia reyi	N/A	N/A	PSFOR101-13	Anastrangalia dubia	0.32
Cerambycidae	Anastrangalia sanguinolenta	N/A	N/A	PSFOR102-13	Anastrangalia dubia	11.57
Cerambycidae	Anisorus quercus	N/A	N/A	PSFOR091-13	Stenocorus meridianus	14.87
Cerambycidae	Anoplodera rufipes	N/A	N/A	PSFOR430-13	Anoplodera sexguttata	9.78
Cerambycidae	Anoplodera sexguttata	N/A	N/A	PSFOR105-13	Anoplodera rufipes	9.78
Cerambycidae	Arhopalus ferus	N/A	N/A	PSFOR188-13	Mycetophagus multipunctatus	12.65
Cerambycidae	Arhopalus rusticus	N/A	N/A	PSFOR108-13	Arhopalus syriacus	2.03
Cerambycidae	Arhopalus syriacus	N/A	N/A	PSFOR107-13	Arhopalus rusticus	2.03
Cerambycidae	Asemum striatum	0.15	0.15	PSFOR050-13	Dinoptera collaris	13.56
Cerambycidae	Callidium aeneum	0.31	0.48	PSFOR442-13	Glaphyra umbellatarum	17.86
Cerambycidae	Callimus abdominalis	N/A	N/A	PSFOR093-13	Stenopterus rufus	23.67
Cerambycidae	Cerambyx cerdo	0.32	0.32	PSFOR046-13	Cerambyx welensii	3.81
Cerambycidae	Cerambyx miles	N/A	N/A	PSFOR045-13	Cerambyx scopolii	9.87
Cerambycidae	Cerambyx scopolii	0.51	0.77	PSFOR111-13	Cerambyx miles	9.87
Cerambycidae	Cerambyx welensii	N/A	N/A	PSFOR095-13	Cerambyx cerdo	3.81
Cerambycidae	Chlorophorus glabromaculatus	N/A	N/A	PSFOR035-13	Anaglyptus mysticus	18.2
Cerambycidae	Chlorophorus ruficornis	N/A	N/A	PSFOR115-13	Chlorophorus sartor	1.1
Cerambycidae	Chlorophorus sartor	N/A	N/A	PSFOR114-13	Chlorophorus ruficornis	1.1
Cerambycidae	Chlorophorus trifasciatus	N/A	N/A	PSFOR1061-14	Xylotrechus rusticus	18.3
Cerambycidae	Chlorophorus varius	N/A	N/A	PSFOR115-13	Chlorophorus sartor	17.03
Cerambycidae	Clytus arietis	0.15	0.15	PSFOR118-13	Clytus lama	8.21
Cerambycidae	Clytus lama	N/A	N/A	PSFOR890-14	Clytus arietis	8.21
Cerambycidae	Clytus rhamni	N/A	N/A	PSFOR118-13	Clytus lama	14.45
Cerambycidae	Clytus tropicus	N/A	N/A	PSFOR118-13	Clytus lama	15.34
Cerambycidae	Cortodera femorata	N/A	N/A	PSFOR446-13	Cortodera humeralis	9.21
Cerambycidae	Cortodera humeralis	0.41	0.61	PSFOR120-13	Cortodera femorata	9.21
Cerambycidae	Deilus fugax	N/A	N/A	PSFOR042-13	Callidium aeneum	20.54
Cerambycidae	Dinoptera collaris	N/A	N/A	PSFOR098-13	Acmaeops marginatus	10.14
Cerambycidae	Evodinus clathratus	N/A	N/A	PSFOR143-13	Pedostrangalia pubescens	14.1
Cerambycidae	Exocentrus adspersus	N/A	N/A	PSFOR032-13	Anaesthetis testacea	13.63
Cerambycidae	Exocentrus lusitanus	N/A	N/A	PSFOR124-13	Exocentrus punctipennis	17.15
Cerambycidae	Exocentrus punctipennis	N/A	N/A	PSFOR122-13	Exocentrus adspersus	15.83
Cerambycidae	Glaphyra umbellatarum	N/A	N/A	PSFOR102-13	Anastrangalia dubia	17.36
Cerambycidae	Grammoptera abdominalis	N/A	N/A	PSFOR434-13	Grammoptera ustulata	6.75
Cerambycidae	Grammoptera ruficornis	N/A	N/A	PSFOR050-13	Dinoptera collaris	15.32
Cerambycidae	Grammoptera ustulata	N/A	N/A	PSFOR985-14	Grammoptera abdominalis	6.75
Cerambycidae	Leptura aurulenta	N/A	N/A	PSFOR059-13	Leptura quadrifasciata	9.16
Cerambycidae	Leptura quadrifasciata	N/A	N/A	PSFOR057-13	Leptura aurulenta	9.16
Cerambycidae	Lepturobosca virens	N/A	N/A	PSFOR030-13	Acanthocinus reticulatus	17.72
Cerambycidae	Mesosa curculionoides	N/A	N/A	PSFOR438-13	Mesosa nebulosa	14.18
Cerambycidae	Mesosa nebulosa	0.15	0.15	PSFOR065-13	Niphona picticornis	13.92
Cerambycidae	Molorchus minor	N/A	N/A	PSFOR102-13	Anastrangalia dubia	20.05
Cerambycidae	Monochamus galloprovincialis	N/A	N/A	PSFOR132-13	Monochamus sutor	2.82
Cerambycidae	Monochamus sutor	N/A	N/A	PSFOR131-13	Monochamus galloprovincialis	2.82
Cerambycidae	Morimus asper	N/A	N/A	PSFOR067-13	Oberea linearis	17.36
Cerambycidae	Nathrius brevipennis	N/A	N/A	PSFOR1008-14	Triplax lepida	24.58
Cerambycidae	Necydalis ulmi	N/A	N/A	PSFOR791-13	Colydium elongatum	18.11
Cerambycidae	Niphona picticornis	N/A	N/A	PSFOR438-13	Mesosa nebulosa	13.92
Cerambycidae	Oberea linearis	0	0	PSFOR087-13	Saperda populnea	15.98
Cerambycidae	Obrium brunneum	N/A	N/A	PSFOR1015-14	Notolaemus unifasciatus	25.26
Cerambycidae	Oplosia cinerea	N/A	N/A	PSFOR032-13	Anaesthetis testacea	15.4
Cerambycidae	Oxymirus cursor	N/A	N/A	PSFOR040-13	Asemum striatum	15.81
Cerambycidae	Oxypleurus nodieri	N/A	N/A	PSFOR050-13	Dinoptera collaris	15.6
Cerambycidae	Pachytodes cerambyciformis	N/A	N/A	PSFOR159-13	Stenurella bifasciata	18.49
Cerambycidae	Paracorymbia fulva	N/A	N/A	PSFOR138-13	Paracorymbia maculicornis	11.58
Cerambycidae	Paracorymbia hybrida	N/A	N/A	PSFOR138-13	Paracorymbia maculicornis	0.93
Cerambycidae	Paracorymbia maculicornis	N/A	N/A	PSFOR137-13	Paracorymbia hybrida	0.93
Cerambycidae	Paracorymbia stragulata	0	0	PSFOR892-14	Stictoleptura rubra	12.33
Cerambycidae	Parmena balteus	N/A	N/A	PSFOR142-13	Parmena meregallii	11.05
Cerambycidae	Parmena meregallii	N/A	N/A	PSFOR141-13	Parmena balteus	11.05
Cerambycidae	Pedostrangalia pubescens	N/A	N/A	PSFOR051-13	Evodinus clathratus	14.1
Cerambycidae	Pedostrangalia revestita	0.31	0.31	PSFOR102-13	Anastrangalia dubia	15.79
Cerambycidae	Phymatodes testaceus	0.96	1.56	PSFOR077-13	Poecilium rufipes	17.01
Cerambycidae	Pidonia lurida	N/A	N/A	PSFOR051-13	Evodinus clathratus	14.64
Cerambycidae	Plagionotus arcuatus	0	0	PSFOR764-13	Melanotus crassicollis	18.62
Cerambycidae	Poecilium alni	0	0	PSFOR981-14	Nacerdes carniolica	17.52
Cerambycidae	Poecilium lividum	N/A	N/A	PSFOR077-13	Poecilium rufipes	18.61
Cerambycidae	Poecilium pusillum	N/A	N/A	PSFOR035-13	Anaglyptus mysticus	18.67
Cerambycidae	Poecilium rufipes	N/A	N/A	PSFOR455-13	Phymatodes testaceus	17.01
Cerambycidae	Pogonocherus caroli	N/A	N/A	PSFOR102-13	Anastrangalia dubia	17.63
Cerambycidae	Pogonocherus decoratus	N/A	N/A	PSFOR087-13	Saperda populnea	19.32
Cerambycidae	Pogonocherus hispidulus	0.2	0.31	PSFOR102-13	Anastrangalia dubia	19.05
Cerambycidae	Pogonocherus ovatus	N/A	N/A	PSFOR085-13	Rhamnusium bicolor	16.15
Cerambycidae	Prinobius myardi	N/A	N/A	PSFOR057-13	Leptura aurulenta	19.34
Cerambycidae	Prionus coriarius	N/A	N/A	PSFOR379-13	Ochina ptinoides	20.32
Cerambycidae	Pseudovadonia livida	3.8	3.8	PSFOR102-13	Anastrangalia dubia	15.43
Cerambycidae	Purpuricenus kaehleri	N/A	N/A	PSFOR1015-14	Notolaemus unifasciatus	20.22
Cerambycidae	Pyrrhidium sanguineum	0.23	0.43	PSFOR391-13	Mycetochara humeralis	19.7
Cerambycidae	Rhagium bifasciatum	2.18	2.18	PSFOR884-14	Rhagium mordax	12.83
Cerambycidae	Rhagium inquisitor	0	0	PSFOR884-14	Rhagium mordax	11.39
Cerambycidae	Rhagium mordax	0	0	PSFOR083-13	Rhagium inquisitor	11.39
Cerambycidae	Rhagium sycophanta	0	0	PSFOR884-14	Rhagium mordax	14.31
Cerambycidae	Rhamnusium bicolor	N/A	N/A	PSFOR884-14	Rhagium mordax	13.36
Cerambycidae	Ropalopus femoratus	N/A	N/A	PSFOR165-13	Stictoleptura trisignata	17.55
Cerambycidae	Rosalia alpina	0	0	PSFOR367-13	Conopalpus testaceus	16.89
Cerambycidae	Rutpela maculata	0	0	PSFOR102-13	Anastrangalia dubia	12.08
Cerambycidae	Saperda populnea	N/A	N/A	PSFOR158-13	Stenostola ferrea	15.24
Cerambycidae	Saperda scalaris	1.87	1.87	PSFOR067-13	Oberea linearis	16.18
Cerambycidae	Semanotus undatus	N/A	N/A	PSFOR045-13	Cerambyx scopolii	16.22
Cerambycidae	Spondylis buprestoides	N/A	N/A	PSFOR791-13	Colydium elongatum	15.38
Cerambycidae	Stenocorus meridianus	2.5	2.5	PSFOR050-13	Dinoptera collaris	14.86
Cerambycidae	Stenopterus rufus	N/A	N/A	PSFOR048-13	Chlorophorus varius	19.56
Cerambycidae	Stenostola ferrea	N/A	N/A	PSFOR087-13	Saperda populnea	15.24
Cerambycidae	Stenurella bifasciata	N/A	N/A	PSFOR104-13	Anastrangalia sanguinolenta	14.92
Cerambycidae	Stenurella melanura	0.73	1.65	PSFOR159-13	Stenurella bifasciata	15.71
Cerambycidae	Stenurella nigra	N/A	N/A	PSFOR451-13	Rutpela maculata	16.53
Cerambycidae	Stictoleptura erythroptera	N/A	N/A	PSFOR102-13	Anastrangalia dubia	15.76
Cerambycidae	Stictoleptura fontenayi	N/A	N/A	PSFOR136-13	Paracorymbia fulva	16.22
Cerambycidae	Stictoleptura rubra	0.77	0.77	PSFOR102-13	Anastrangalia dubia	11.34
Cerambycidae	Stictoleptura scutellata	N/A	N/A	PSFOR136-13	Paracorymbia fulva	15.06
Cerambycidae	Stictoleptura trisignata	N/A	N/A	PSFOR102-13	Anastrangalia dubia	13.88
Cerambycidae	Tetropium castaneum	0	0	PSFOR050-13	Dinoptera collaris	18.29
Cerambycidae	Tetrops praeustus	12.93	12.93	PSFOR131-13	Monochamus galloprovincialis	14.87
Cerambycidae	Trichoferus holosericeus	N/A	N/A	PSFOR338-13	Ampedus nigerrimus	20.08
Cerambycidae	Trichoferus pallidus	0	0	PSFOR165-13	Stictoleptura trisignata	16.95
Cerambycidae	Xylotrechus rusticus	N/A	N/A	PSFOR119-13	Clytus rhamni	16.79
Cerophytidae	Cerophytum elateroides	N/A	N/A	PSFOR050-13	Dinoptera collaris	21.36
Ciidae	Cis boleti	N/A	N/A	PSFOR1032-14	Sphindus dubius	10.36
Cleridae	Clerus mutillarius	N/A	N/A	PSFOR050-13	Dinoptera collaris	16.37
Cleridae	Opilo mollis	0.15	0.15	PSFOR626-13	Opilo pallidus	10.32
Cleridae	Opilo pallidus	0.15	0.15	PSFOR1070-14	Opilo mollis	10.32
Cleridae	Tilloidea unifasciata	N/A	N/A	PSFOR1070-14	Opilo mollis	18.58
Cleridae	Tillus elongatus	5	9.99	PSFOR584-13	Chrysobothris affinis	14.34
Curculionidae	Cryphalus abietis	N/A	N/A	PSFOR422-13	Cryphalus piceae	13.96
Curculionidae	Cryphalus piceae	N/A	N/A	PSFOR421-13	Cryphalus abietis	13.96
Curculionidae	Dryocoetes autographus	N/A	N/A	PSFOR404-13	Xyleborus dispar	17.22
Curculionidae	Dryocoetes villosus	1.72	1.72	PSFOR404-13	Xyleborus dispar	17.69
Curculionidae	Ernoporicus fagi	0	0	PSFOR411-13	Dryocoetes villosus	22.58
Curculionidae	Hylastes angustatus	N/A	N/A	PSFOR420-13	Hylastes attenuatus	16.29
Curculionidae	Hylastes attenuatus	1.24	1.24	PSFOR919-14	Hylastes angustatus	16.29
Curculionidae	Hylastes barnensis	0	0	PSFOR428-13	Hylastes cunicularius	14.6
Curculionidae	Hylastes cunicularius	N/A	N/A	PSFOR920-14	Hylastes barnensis	14.6
Curculionidae	Hylesinus crenatus	0.35	0.35	PSFOR400-13	Taphrorychus bicolor	17.5
Curculionidae	Hylurgus miklitzi	N/A	N/A	PSFOR924-14	Hylastes barnensis	20.61
Curculionidae	Ips typographus	N/A	N/A	PSFOR031-13	Aegosoma scabricorne	21.49
Curculionidae	Kissophagus hederae	N/A	N/A	PSFOR706-13	Hylesinus crenatus	18.73
Curculionidae	Phloeotribus scarabaeoides	N/A	N/A	PSFOR029-13	Acanthocinus aedilis	21.21
Curculionidae	Platypus cylindrus	3.76	3.76	PSFOR050-13	Dinoptera collaris	18.11
Curculionidae	Scolytus intricatus	0.5	0.5	PSFOR1066-14	Scolytus ratzeburgii	21.36
Curculionidae	Scolytus ratzeburgii	N/A	N/A	PSFOR424-13	Scolytus intricatus	21.36
Curculionidae	Taphrorychus bicolor	N/A	N/A	PSFOR706-13	Hylesinus crenatus	17.5
Curculionidae	Trypodendron domesticum	0.46	0.46	PSFOR888-14	Trypodendron signatum	10.73
Curculionidae	Trypodendron lineatum	N/A	N/A	PSFOR872-14	Trypodendron domesticum	15.93
Curculionidae	Trypodendron signatum	1.27	1.27	PSFOR406-13	Trypodendron domesticum	10.73
Curculionidae	Xyleborinus saxeseni	0	0	PSFOR404-13	Xyleborus dispar	16.33
Curculionidae	Xyleborus dispar	0	0	PSFOR402-13	Xyleborinus saxeseni	16.33
Curculionidae	Xyleborus dryographus	0	0	PSFOR413-13	Xylosandrus germanus	17.07
Curculionidae	Xyleborus monographus	0.21	0.46	PSFOR399-13	Xyleborus dryographus	17.94
Curculionidae	Xylosandrus germanus	N/A	N/A	PSFOR399-13	Xyleborus dryographus	17.07
Elateridae	Agriotes acuminatus	N/A	N/A	PSFOR1075-14	Agriotes pallidulus	12.28
Elateridae	Agriotes pallidulus	N/A	N/A	PSFOR1053-14	Agriotes acuminatus	12.28
Elateridae	Agriotes pilosellus	0	0	PSFOR544-13	Ampedus pomorum	16.33
Elateridae	Ampedus aurilegulus	1.13	1.13	PSFOR845-13	Ampedus sanguineus	2.45
Elateridae	Ampedus balteatus	0.62	1.39	PSFOR518-13	Ampedus scrofa	6.45
Elateridae	Ampedus brunnicornis	0	0	PSFOR518-13	Ampedus scrofa	6.12
Elateridae	Ampedus cardinalis	0.46	0.46	PSFOR848-13	Ampedus praestus	1.23
Elateridae	Ampedus cinnabarinus	N/A	N/A	PSFOR539-13	Ampedus quercicola	7.46
Elateridae	Ampedus elongatulus	0.86	1.51	PSFOR542-13	Ampedus nemoralis	6.65
Elateridae	Ampedus erythrogonus	0.21	0.31	PSFOR957-14	Ampedus balteatus	12.67
Elateridae	Ampedus melonii	N/A	N/A	PSFOR735-13	Ampedus praestus	0
Elateridae	Ampedus nemoralis	0.1	0.15	PSFOR529-13	Ampedus pomorum	0
Elateridae	Ampedus nigerrimus	0.31	0.61	PSFOR832-13	Ampedus rufipennis	8.74
Elateridae	Ampedus nigrinus	0.77	0.77	PSFOR550-13	Ampedus pomorum	11.02
Elateridae	Ampedus pomonae	N/A	N/A	PSFOR839-13	Ampedus sanguinolentus	1.86
Elateridae	Ampedus pomorum	0.83	3.06	PSFOR542-13	Ampedus nemoralis	0
Elateridae	Ampedus praestus	0.15	0.15	PSFOR936-14	Ampedus melonii	0
Elateridae	Ampedus quercicola	0.75	1.88	PSFOR734-13	Ampedus cinnabarinus	7.46
Elateridae	Ampedus rufipennis	0.59	1.24	PSFOR837-13	Ampedus pomonae	6.96
Elateridae	Ampedus sanguineus	0.23	0.46	PSFOR721-13	Ampedus aurilegulus	2.45
Elateridae	Ampedus sanguinolentus	N/A	N/A	PSFOR837-13	Ampedus pomonae	1.86
Elateridae	Ampedus scrofa	0.54	1.76	PSFOR848-13	Ampedus praestus	2.82
Elateridae	Ampedus sinuatus	N/A	N/A	PSFOR339-13	Ampedus rufipennis	11.9
Elateridae	Athous haemorrhoidalis	N/A	N/A	PSFOR1054-14	Athous vittatus	13.5
Elateridae	Athous vittatus	0.17	0.17	PSFOR1058-14	Athous haemorrhoidalis	13.5
Elateridae	Brachygonus campadelli	N/A	N/A	PSFOR972-14	Reitterelater bouyoni	9.54
Elateridae	Brachygonus megerlei	N/A	N/A	PSFOR740-13	Brachygonus campadelli	9.56
Elateridae	Brachygonus ruficeps	0	0	PSFOR973-14	Reitterelater dubius	10.83
Elateridae	Calambus bipustulatus	0	0	PSFOR814-13	Brachygonus ruficeps	16.2
Elateridae	Cardiophorus anticus	N/A	N/A	PSFOR774-13	Cardiophorus vestigialis	12.39
Elateridae	Cardiophorus ruficollis	N/A	N/A	PSFOR225-13	Stenomax foudrasi	17.22
Elateridae	Cardiophorus rufipes	N/A	N/A	PSFOR774-13	Cardiophorus vestigialis	10.77
Elateridae	Cardiophorus vestigialis	N/A	N/A	PSFOR975-14	Cardiophorus rufipes	10.77
Elateridae	Dalopius marginatus	N/A	N/A	PSFOR772-13	Idolus picipennis	12.57
Elateridae	Danosoma fasciata	0	0	PSFOR755-13	Lacon punctatus	14.31
Elateridae	Denticollis linearis	1.9	2.85	PSFOR749-13	Denticollis rubens	11.35
Elateridae	Denticollis rubens	0	0	PSFOR865-14	Denticollis linearis	11.35
Elateridae	Hemicrepidius hirtus	0.15	0.15	PSFOR764-13	Melanotus crassicollis	17.32
Elateridae	Hypoganus inunctus	0	0	PSFOR978-14	Athous vittatus	15.51
Elateridae	Idolus picipennis	N/A	N/A	PSFOR1055-14	Dalopius marginatus	12.57
Elateridae	Ischnodes sanguinicollis	N/A	N/A	PSFOR772-13	Idolus picipennis	19.26
Elateridae	Lacon punctatus	N/A	N/A	PSFOR969-14	Danosoma fasciata	14.31
Elateridae	Melanotus castanipes	5.93	5.93	PSFOR1042-14	Melanotus villosus	8.67
Elateridae	Melanotus crassicollis	N/A	N/A	PSFOR886-14	Melanotus castanipes	13.39
Elateridae	Melanotus villosus	3.8	3.8	PSFOR886-14	Melanotus castanipes	8.67
Elateridae	Nothodes parvulus	0.16	0.16	PSFOR883-14	Hypoganus inunctus	15.98
Elateridae	Podeonius acuticornis	0.15	0.15	PSFOR1042-14	Melanotus villosus	17.36
Elateridae	Procraerus tibialis	N/A	N/A	PSFOR753-13	Hypoganus inunctus	17.71
Elateridae	Reitterelater bouyoni	N/A	N/A	PSFOR740-13	Brachygonus campadelli	9.54
Elateridae	Reitterelater dubius	N/A	N/A	PSFOR971-14	Brachygonus ruficeps	10.83
Elateridae	Stenagostus rhombeus	N/A	N/A	PSFOR772-13	Idolus picipennis	16.19
Endomychidae	Endomychus coccineus	0.16	0.16	PSFOR862-14	Schizotus pectinicornis	16.08
Erotylidae	Triplax lepida	N/A	N/A	PSFOR981-14	Nacerdes carniolica	18.65
Erotylidae	Tritoma bipustulata	N/A	N/A	PSFOR457-13	Litargus connexus	20.71
Eucinetidae	Nycteus meridionalis	N/A	N/A	PSFOR085-13	Rhamnusium bicolor	19.05
Eucnemidae	Eucnemis capucina	N/A	N/A	PSFOR382-13	Ptilinus pectinicornis	23.47
Eucnemidae	Isorhipis marmottani	N/A	N/A	PSFOR1010-14	Isorhipis melasoides	15.5
Eucnemidae	Isorhipis melasoides	N/A	N/A	PSFOR315-13	Isorhipis marmottani	15.5
Eucnemidae	Melasis buprestoides	0	0	PSFOR1010-14	Isorhipis melasoides	21.76
Eucnemidae	Microrhagus pygmaeus	0	0	PSFOR780-13	Lissodema lituratum	26.31
Histeridae	Plegaderus dissectus	N/A	N/A	PSFOR225-13	Stenomax foudrasi	21.31
Laemophloeidae	Laemophloeus monilis	N/A	N/A	PSFOR165-13	Stictoleptura trisignata	20.52
Laemophloeidae	Notolaemus unifasciatus	N/A	N/A	PSFOR791-13	Colydium elongatum	16.54
Leiodidae	Anisotoma humeralis	0.17	0.17	PSFOR188-13	Mycetophagus multipunctatus	15.77
Leiodidae	Colon latum	N/A	N/A	PSFOR791-13	Colydium elongatum	18.34
Lucanidae	Aesalus scarabaeoides	N/A	N/A	PSFOR911-14	Colon latum	21.38
Lucanidae	Dorcus parallelipipedus	0	0	PSFOR102-13	Anastrangalia dubia	19.89
Lucanidae	Lucanus cervus	N/A	N/A	PSFOR258-13	Lucanus cervus fabiani	0
Lucanidae	Lucanus cervus fabiani	N/A	N/A	PSFOR257-13	Lucanus cervus	0
Lucanidae	Sinodendron cylindricum	1.77	2.66	PSFOR1038-14	Trox perrisii	17.36
Lycidae	Benibotarus alternatus	N/A	N/A	PSFOR1022-14	Lygistopterus sanguineus	18.33
Lycidae	Dictyopterus aurora	N/A	N/A	PSFOR638-13	Benibotarus alternatus	21.41
Lycidae	Lygistopterus sanguineus	N/A	N/A	PSFOR638-13	Benibotarus alternatus	18.33
Lycidae	Pyropterus nigroruber	N/A	N/A	PSFOR638-13	Benibotarus alternatus	19.67
Lymexylidae	Elateroides dermestoides	0	0	PSFOR607-13	Biphyllus lunatus	19.16
Lymexylidae	Lymexylon navale	0	0	PSFOR430-13	Anoplodera sexguttata	17.95
Melandryidae	Abdera bifasciata	N/A	N/A	PSFOR276-13	Phloiotrya rufipes	13.26
Melandryidae	Conopalpus brevicollis	N/A	N/A	PSFOR274-13	Osphya aeneipennis	14.33
Melandryidae	Conopalpus testaceus	0	0	PSFOR083-13	Rhagium inquisitor	15.08
Melandryidae	Dircaea australis	N/A	N/A	PSFOR361-13	Abdera bifasciata	15.56
Melandryidae	Hypulus quercinus	0	0	PSFOR050-13	Dinoptera collaris	15.61
Melandryidae	Marolia variegata	N/A	N/A	PSFOR791-13	Colydium elongatum	15.03
Melandryidae	Melandrya barbata	0	0	PSFOR268-13	Melandrya caraboides	13.73
Melandryidae	Melandrya caraboides	0.31	0.46	PSFOR471-13	Melandrya barbata	13.73
Melandryidae	Orchesia minor	N/A	N/A	PSFOR266-13	Marolia variegata	15.23
Melandryidae	Orchesia undulata	0	0	PSFOR791-13	Colydium elongatum	15.19
Melandryidae	Osphya aeneipennis	N/A	N/A	PSFOR264-13	Conopalpus brevicollis	14.33
Melandryidae	Phloiotrya rufipes	0	0	PSFOR277-13	Phloiotrya tenuis	13
Melandryidae	Phloiotrya tenuis	N/A	N/A	PSFOR276-13	Phloiotrya rufipes	13
Melandryidae	Rushia parreyssi	N/A	N/A	PSFOR1007-14	Biphyllus lunatus	16.6
Melandryidae	Serropalpus barbatus	0	0	PSFOR471-13	Melandrya barbata	15.78
Melandryidae	Zilora obscura	N/A	N/A	PSFOR277-13	Phloiotrya tenuis	17.35
Monotomidae	Rhizophagus aeneus	N/A	N/A	PSFOR564-13	Rhizophagus cribratus	13.33
Monotomidae	Rhizophagus brancsiki	N/A	N/A	PSFOR568-13	Rhizophagus paralellocollis	11.2
Monotomidae	Rhizophagus cribratus	0.52	0.75	PSFOR560-13	Rhizophagus aeneus	13.33
Monotomidae	Rhizophagus depressus	N/A	N/A	PSFOR566-13	Rhizophagus nitidulus	15.48
Monotomidae	Rhizophagus nitidulus	N/A	N/A	PSFOR565-13	Rhizophagus perforatus	12.49
Monotomidae	Rhizophagus paralellocollis	N/A	N/A	PSFOR569-13	Rhizophagus brancsiki	11.2
Monotomidae	Rhizophagus perforatus	N/A	N/A	PSFOR568-13	Rhizophagus paralellocollis	12.1
Mycetophagidae	Eulagius filicornis	0	0	PSFOR294-13	Pyrochroa serraticornis	16.35
Mycetophagidae	Litargus balteatus	N/A	N/A	PSFOR791-13	Colydium elongatum	14.47
Mycetophagidae	Litargus connexus	N/A	N/A	PSFOR1007-14	Biphyllus lunatus	13.83
Mycetophagidae	Mycetophagus decempunctatus	N/A	N/A	PSFOR861-14	Endomychus coccineus	16.34
Mycetophagidae	Mycetophagus fulvicollis	N/A	N/A	PSFOR359-13	Mycetophagus quadriguttatus	13.04
Mycetophagidae	Mycetophagus multipunctatus	N/A	N/A	PSFOR106-13	Arhopalus ferus	12.65
Mycetophagidae	Mycetophagus piceus	N/A	N/A	PSFOR187-13	Mycetophagus fulvicollis	14.32
Mycetophagidae	Mycetophagus populi	N/A	N/A	PSFOR187-13	Mycetophagus fulvicollis	15.07
Mycetophagidae	Mycetophagus quadriguttatus	N/A	N/A	PSFOR187-13	Mycetophagus fulvicollis	13.04
Mycetophagidae	Mycetophagus quadripustulatus	N/A	N/A	PSFOR357-13	Mycetophagus piceus	14.54
Mycetophagidae	Triphyllus bicolor	N/A	N/A	PSFOR359-13	Mycetophagus quadriguttatus	14.92
Nitidulidae	Cryptarcha strigata	2.17	2.17	PSFOR802-13	Pityophagus ferrugineus	18.43
Nitidulidae	Cychramus luteus	N/A	N/A	PSFOR102-13	Anastrangalia dubia	20.2
Nitidulidae	Cychramus variegatus	N/A	N/A	PSFOR041-13	Asemum striatum	17.35
Nitidulidae	Pityophagus ferrugineus	N/A	N/A	PSFOR647-13	Pityophagus laevior	1.91
Nitidulidae	Pityophagus laevior	N/A	N/A	PSFOR802-13	Pityophagus ferrugineus	1.91
Oedemeridae	Chrysanthia viridissima	N/A	N/A	PSFOR188-13	Mycetophagus multipunctatus	16.85
Oedemeridae	Ischnomera caerulea	N/A	N/A	PSFOR1067-14	Ischnomera cyanea	8.29
Oedemeridae	Ischnomera cyanea	N/A	N/A	PSFOR982-14	Ischnomera caerulea	8.29
Oedemeridae	Nacerdes carniolica	0	0	PSFOR370-13	Tillus elongatus	15.23
Oedemeridae	Oedemera barbara	N/A	N/A	PSFOR102-13	Anastrangalia dubia	16.46
Oedemeridae	Oedemera femoralis	N/A	N/A	PSFOR368-13	Oedemera podagrariae	11.92
Oedemeridae	Oedemera nobilis	N/A	N/A	PSFOR368-13	Oedemera podagrariae	13.76
Oedemeridae	Oedemera podagrariae	0.98	0.98	PSFOR660-13	Oedemera femoralis	11.92
Prostomidae	Prostomis mandibularis	N/A	N/A	PSFOR102-13	Anastrangalia dubia	18.78
Ptinidae	Anobium hederae	N/A	N/A	PSFOR702-13	Hemicoelus fulvicornis	17.67
Ptinidae	Anobium inexspectatum	N/A	N/A	PSFOR694-13	Anobium hederae	17.75
Ptinidae	Gastrallus knizeki	N/A	N/A	PSFOR1040-14	Gastrallus laevigatus	3.14
Ptinidae	Gastrallus laevigatus	N/A	N/A	PSFOR697-13	Gastrallus knizeki	3.14
Ptinidae	Grynobius planus	N/A	N/A	PSFOR764-13	Melanotus crassicollis	20.78
Ptinidae	Hadrobregmus denticollis	0	0	PSFOR791-13	Colydium elongatum	20.52
Ptinidae	Hadrobregmus pertinax	N/A	N/A	PSFOR004-13	Tillus elongatus	21.83
Ptinidae	Hedobia pubescens	N/A	N/A	PSFOR457-13	Litargus connexus	19.52
Ptinidae	Hemicoelus canaliculatus	N/A	N/A	PSFOR1007-14	Biphyllus lunatus	17.15
Ptinidae	Hemicoelus fulvicornis	N/A	N/A	PSFOR694-13	Anobium hederae	17.67
Ptinidae	Ochina latreillei	N/A	N/A	PSFOR379-13	Ochina ptinoides	19.43
Ptinidae	Ochina ptinoides	0.31	0.31	PSFOR626-13	Opilo pallidus	17.14
Ptinidae	Ptilinus fuscus	N/A	N/A	PSFOR382-13	Ptilinus pectinicornis	12.36
Ptinidae	Ptilinus pectinicornis	0.06	0.17	PSFOR679-13	Ptilinus fuscus	12.36
Ptinidae	Ptinomorphus regalis	0	0	PSFOR457-13	Litargus connexus	19.38
Ptinidae	Ptinus italicus	N/A	N/A	PSFOR685-13	Ptinus palliatus	20.14
Ptinidae	Ptinus palliatus	N/A	N/A	PSFOR032-13	Anaesthetis testacea	19.94
Ptinidae	Xestobium declive	N/A	N/A	PSFOR1042-14	Melanotus villosus	18.57
Ptinidae	Xestobium plumbeum	N/A	N/A	PSFOR379-13	Ochina ptinoides	20.3
Ptinidae	Xestobium rufovillosum	0.26	0.26	PSFOR225-13	Stenomax foudrasi	19.93
Pyrochroidae	Pyrochroa coccinea	0	0	PSFOR294-13	Pyrochroa serraticornis	9.28
Pyrochroidae	Pyrochroa serraticornis	N/A	N/A	PSFOR295-13	Pyrochroa coccinea	9.28
Pyrochroidae	Schizotus pectinicornis	0.33	0.33	PSFOR295-13	Pyrochroa coccinea	10.83
Pythidae	Pytho depressus	N/A	N/A	PSFOR981-14	Nacerdes carniolica	15.79
Salpingidae	Colposis mutilatus	N/A	N/A	PSFOR892-14	Stictoleptura rubra	17.51
Salpingidae	Lissodema cursor	2.82	2.82	PSFOR457-13	Litargus connexus	14.86
Salpingidae	Lissodema lituratum	N/A	N/A	PSFOR120-13	Cortodera femorata	15.05
Salpingidae	Rabocerus foveolatus	N/A	N/A	PSFOR783-13	Sphaeriestes castaneus	12.84
Salpingidae	Salpingus planirostris	N/A	N/A	PSFOR102-13	Anastrangalia dubia	16.79
Salpingidae	Salpingus ruficollis	N/A	N/A	PSFOR345-13	Salpingus planirostris	18.02
Salpingidae	Salpingus tapirus	N/A	N/A	PSFOR782-13	Salpingus zeneus	12.68
Salpingidae	Salpingus zeneus	N/A	N/A	PSFOR781-13	Salpingus tapirus	12.68
Salpingidae	Sphaeriestes castaneus	N/A	N/A	PSFOR777-13	Rabocerus foveolatus	12.84
Scarabaeidae	Cetonia aurata	0.46	0.46	PSFOR252-13	Protaetia oblonga	13.24
Scarabaeidae	Cetonischema aeruginosa	N/A	N/A	PSFOR243-13	Protaetia affinis	11.73
Scarabaeidae	Gnorimus nobilis	N/A	N/A	PSFOR240-13	Gnorimus variabilis	14.23
Scarabaeidae	Gnorimus variabilis	N/A	N/A	PSFOR239-13	Gnorimus nobilis	14.23
Scarabaeidae	Oxythyrea funesta	N/A	N/A	PSFOR250-13	Protaetia cuprea	13.94
Scarabaeidae	Protaetia affinis	N/A	N/A	PSFOR242-13	Cetonischema aeruginosa	11.73
Scarabaeidae	Protaetia cuprea	N/A	N/A	PSFOR249-13	Protaetia cuprea metallica	1.24
Scarabaeidae	Protaetia cuprea metallica	N/A	N/A	PSFOR250-13	Protaetia cuprea	1.24
Scarabaeidae	Protaetia fieberi	N/A	N/A	PSFOR245-13	Protaetia morio	7.64
Scarabaeidae	Protaetia lugubris	N/A	N/A	PSFOR242-13	Cetonischema aeruginosa	11.94
Scarabaeidae	Protaetia morio	N/A	N/A	PSFOR251-13	Protaetia fieberi	7.64
Scarabaeidae	Protaetia oblonga	N/A	N/A	PSFOR251-13	Protaetia fieberi	9.19
Scarabaeidae	Protaetia opaca	N/A	N/A	PSFOR245-13	Protaetia morio	10.05
Scarabaeidae	Trichius fasciatus	N/A	N/A	PSFOR254-13	Trichius zonatus	8.48
Scarabaeidae	Trichius zonatus	N/A	N/A	PSFOR253-13	Trichius fasciatus	8.48
Silvanidae	Silvanus bidentatus	N/A	N/A	PSFOR051-13	Evodinus clathratus	23.95
Sphindidae	Odontosphindus grandis	N/A	N/A	PSFOR471-13	Melandrya barbata	17.49
Sphindidae	Sphindus dubius	N/A	N/A	PSFOR1062-14	Cis boleti	10.36
Tenebrionidae	Bolitophagus reticulatus	1.08	1.08	PSFOR370-13	Tillus elongatus	19.19
Tenebrionidae	Clamoris crenata	N/A	N/A	PSFOR051-13	Evodinus clathratus	18.88
Tenebrionidae	Corticeus bicolor	N/A	N/A	PSFOR233-13	Corticeus pini	18.15
Tenebrionidae	Corticeus linearis	N/A	N/A	PSFOR233-13	Corticeus pini	15.03
Tenebrionidae	Corticeus pini	0.31	0.31	PSFOR791-13	Colydium elongatum	14.48
Tenebrionidae	Corticeus unicolor	0	0	PSFOR1007-14	Biphyllus lunatus	16.62
Tenebrionidae	Cteniopus sulphureus	0	0	PSFOR209-13	Megischia curvipes	14.62
Tenebrionidae	Diaperis boleti	0.15	0.15	PSFOR357-13	Mycetophagus piceus	15.97
Tenebrionidae	Gonodera luperus	0	0	PSFOR199-13	Pseudocistela ceramboides	17.01
Tenebrionidae	Helops coeruleus	N/A	N/A	PSFOR225-13	Stenomax foudrasi	16.96
Tenebrionidae	Hymenalia rufipes	N/A	N/A	PSFOR218-13	Omophlus lepturoides	16.01
Tenebrionidae	Hymenophorus doublieri	N/A	N/A	PSFOR225-13	Stenomax foudrasi	20.49
Tenebrionidae	Megischia curvipes	N/A	N/A	PSFOR218-13	Omophlus lepturoides	13.54
Tenebrionidae	Mycetochara humeralis	N/A	N/A	PSFOR211-13	Mycetochara maura	15.1
Tenebrionidae	Mycetochara maura	0	0	PSFOR391-13	Mycetochara humeralis	15.1
Tenebrionidae	Mycetochara quadrimaculata	0	0	PSFOR211-13	Mycetochara maura	19.2
Tenebrionidae	Nalassus assimilis	N/A	N/A	PSFOR225-13	Stenomax foudrasi	16.58
Tenebrionidae	Nalassus dryadophilus	0	0	PSFOR225-13	Stenomax foudrasi	14.75
Tenebrionidae	Nalassus ecoffeti	9.7	14.93	PSFOR225-13	Stenomax foudrasi	13.59
Tenebrionidae	Nalassus laevioctostriatus	0.55	0.82	PSFOR216-13	Nalassus ecoffeti	14.97
Tenebrionidae	Omophlus lepturoides	N/A	N/A	PSFOR209-13	Megischia curvipes	13.54
Tenebrionidae	Omophlus pubescens	N/A	N/A	PSFOR218-13	Omophlus lepturoides	13.92
Tenebrionidae	Palorus depressus	0	0	PSFOR391-13	Mycetochara humeralis	16.98
Tenebrionidae	Pentaphyllus testaceus	N/A	N/A	PSFOR225-13	Stenomax foudrasi	20.17
Tenebrionidae	Platydema europaeum	N/A	N/A	PSFOR791-13	Colydium elongatum	16.94
Tenebrionidae	Platydema violaceum	0	0	PSFOR1068-14	Nalassus laevioctostriatus	17.16
Tenebrionidae	Pseudocistela ceramboides	0.2	0.31	PSFOR218-13	Omophlus lepturoides	16.2
Tenebrionidae	Scaphidema metallicum	N/A	N/A	PSFOR492-13	Platydema violaceum	19.46
Tenebrionidae	Stenomax foudrasi	N/A	N/A	PSFOR216-13	Nalassus ecoffeti	13.59
Tenebrionidae	Tenebrio obscurus	N/A	N/A	PSFOR389-13	Palorus depressus	18.18
Tenebrionidae	Uloma culinaris	N/A	N/A	PSFOR225-13	Stenomax foudrasi	14.9
Tetratomidae	Hallomenus binotatus	N/A	N/A	PSFOR457-13	Litargus connexus	16.66
Trogidae	Trox perrisii	0	0	PSFOR584-13	Chrysobothris affinis	16.55
Trogossitidae	Calitys scabra	N/A	N/A	PSFOR102-13	Anastrangalia dubia	17.66
Trogossitidae	Grynocharis oblonga	N/A	N/A	PSFOR375-13	Tillus elongatus	16.32
Trogossitidae	Nemozoma cornutum	N/A	N/A	PSFOR551-13	Nemozoma elongatum	11.2
Trogossitidae	Nemozoma elongatum	0.13	0.25	PSFOR552-13	Nemozoma cornutum	11.2
Trogossitidae	Peltis ferruginea	N/A	N/A	PSFOR884-14	Rhagium mordax	17.62
Trogossitidae	Peltis grossa	N/A	N/A	PSFOR813-13	Opilo pallidus	17.69
Trogossitidae	Temnoscheila coerulea	N/A	N/A	PSFOR764-13	Melanotus crassicollis	20.64
Trogossitidae	Tenebroides fuscus	N/A	N/A	PSFOR051-13	Evodinus clathratus	21.37
Trogossitidae	Thymalus limbatus	0.16	0.32	PSFOR361-13	Abdera bifasciata	18.56
Zopheridae	Colobicus hirtus	N/A	N/A	PSFOR357-13	Mycetophagus piceus	18.67
Zopheridae	Colydium elongatum	N/A	N/A	PSFOR057-13	Leptura aurulenta	13.54
Zopheridae	Coxelus pictus	2.98	2.98	PSFOR261-13	Hypulus quercinus	21.13
Zopheridae	Endophloeus markovichianus	N/A	N/A	PSFOR349-13	Eulagius filicornis	16.79
Zopheridae	Synchita mediolanensis	N/A	N/A	PSFOR225-13	Stenomax foudrasi	20.28
Zopheridae	Synchita variegata	N/A	N/A	PSFOR791-13	Colydium elongatum	20.79
